# Supplementary material for: PARP1 as a biomarker for early detection and intraoperative tumor delineation in epithelial cancers – first-in-human results
Source: bioRxiv or medRxiv preprint supplement (doi:10.1101/663385), 2019-06-14
Supplement: Supplementary file [file media-2.pdf]

# **PARPi-FL staining of fresh biopsy tissues for identification of tumor and margin tissue**

Blinded study

Training set

# Oral cancer - basic histology

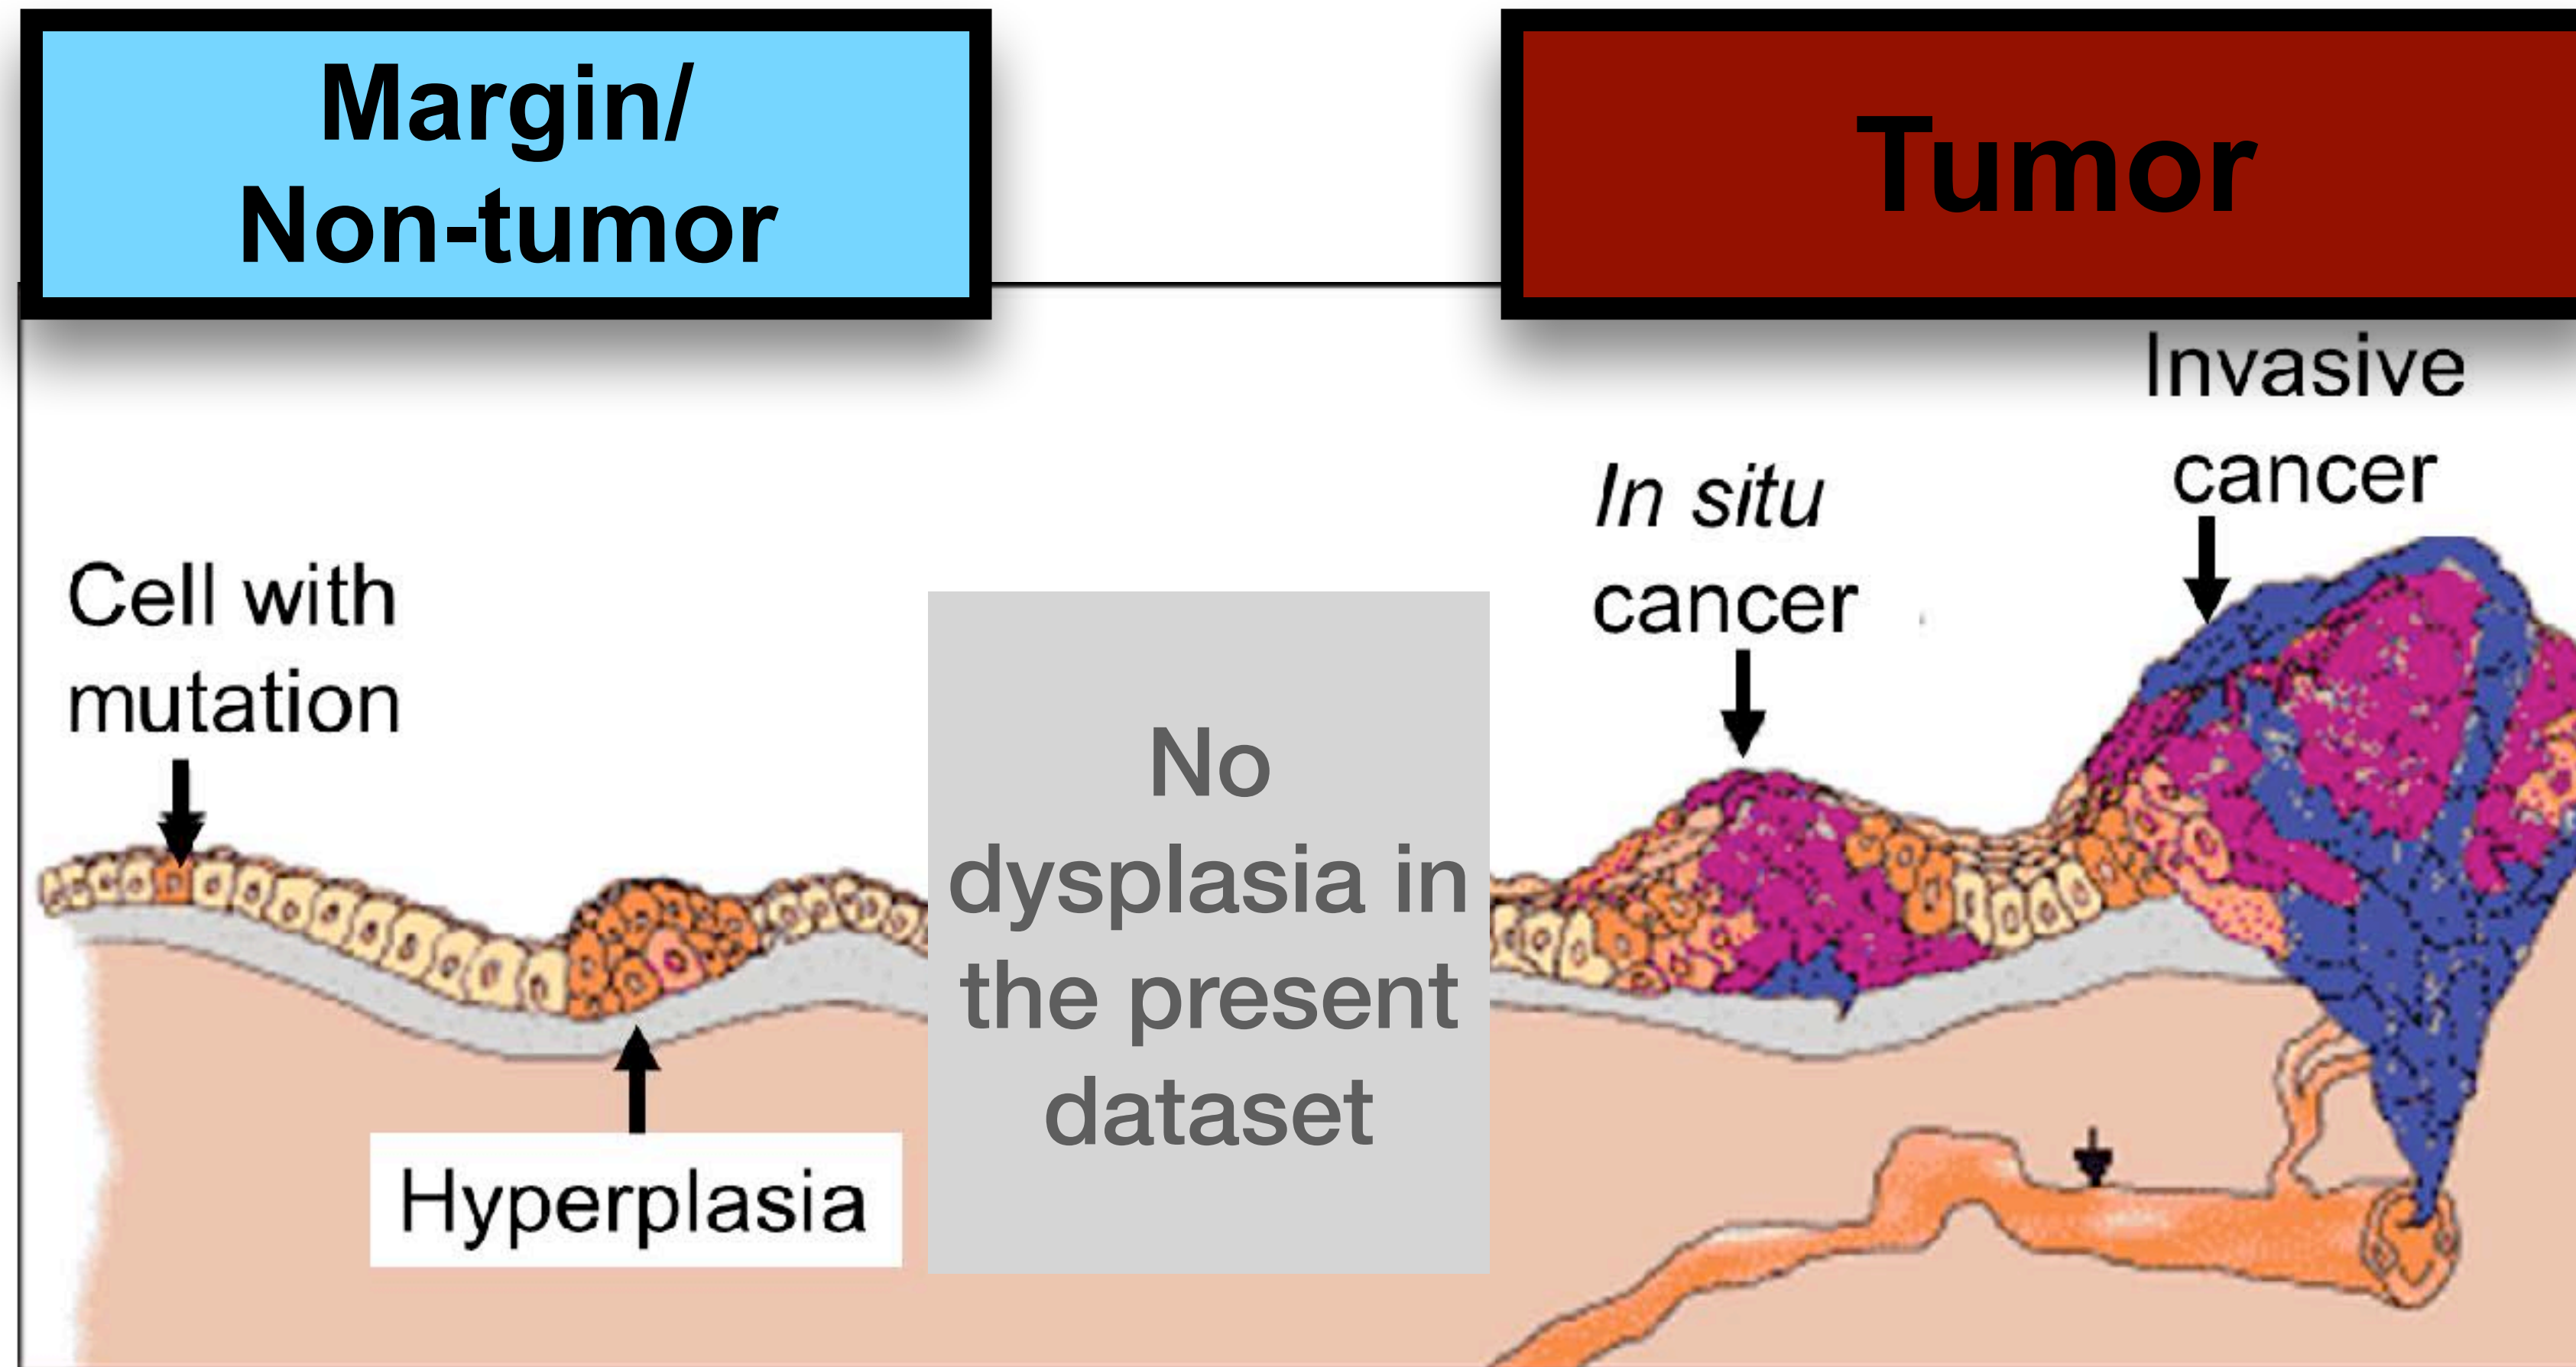

**Goal:** Identify tissues as tumor or margin based on confocal microscopy images (after staining with our fluorescent marker PARPi-FL)

➡ what are the features that define tumor vs. margin tissues?



# Margin [1]

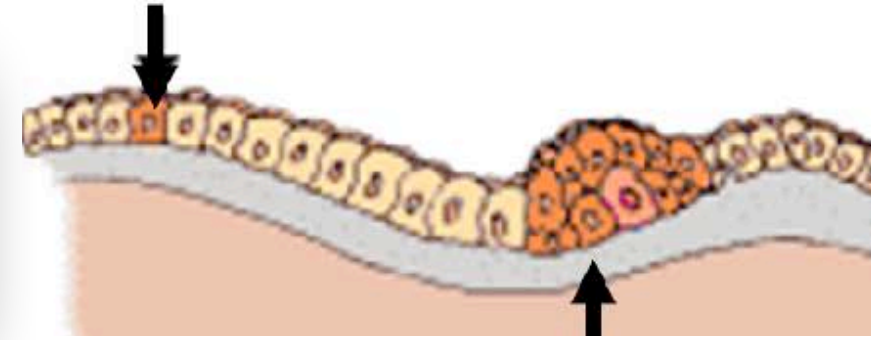

Morphological  
stain (H&E)

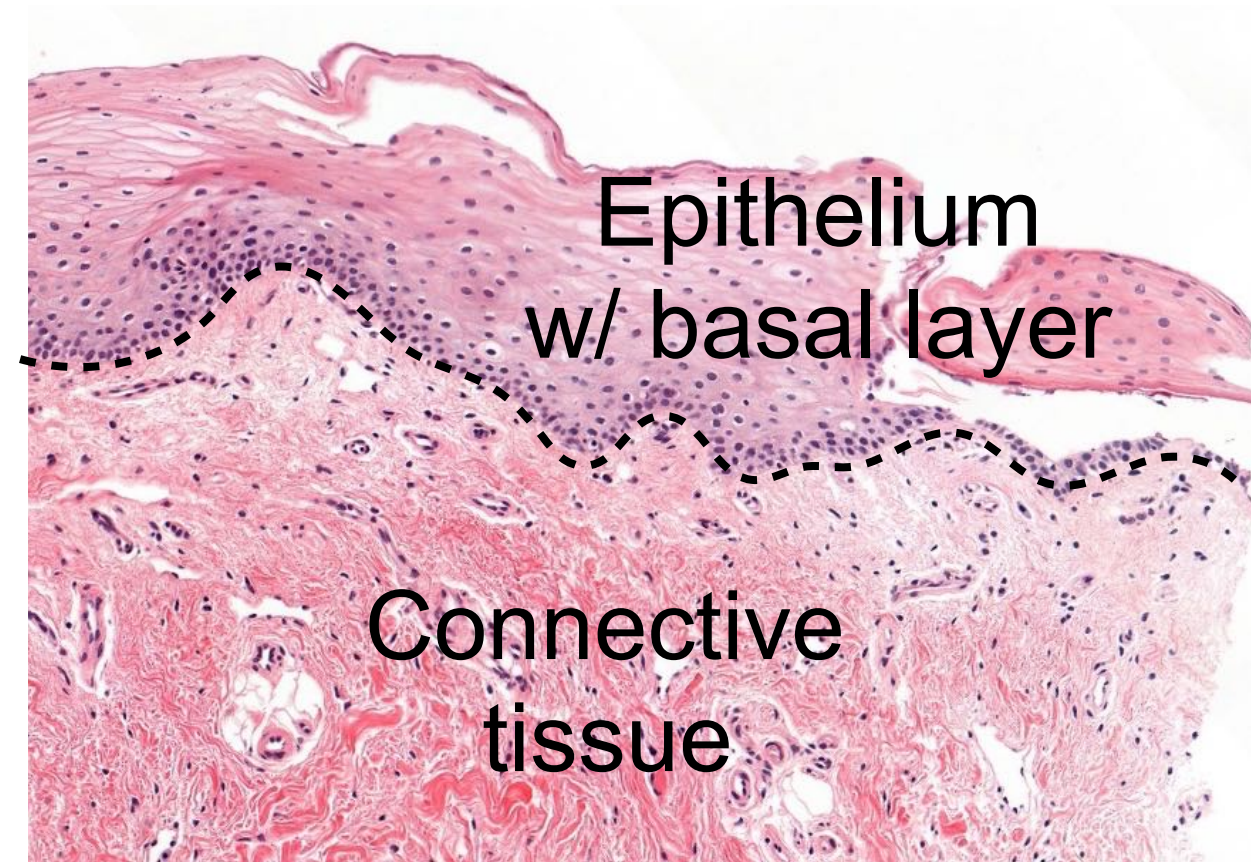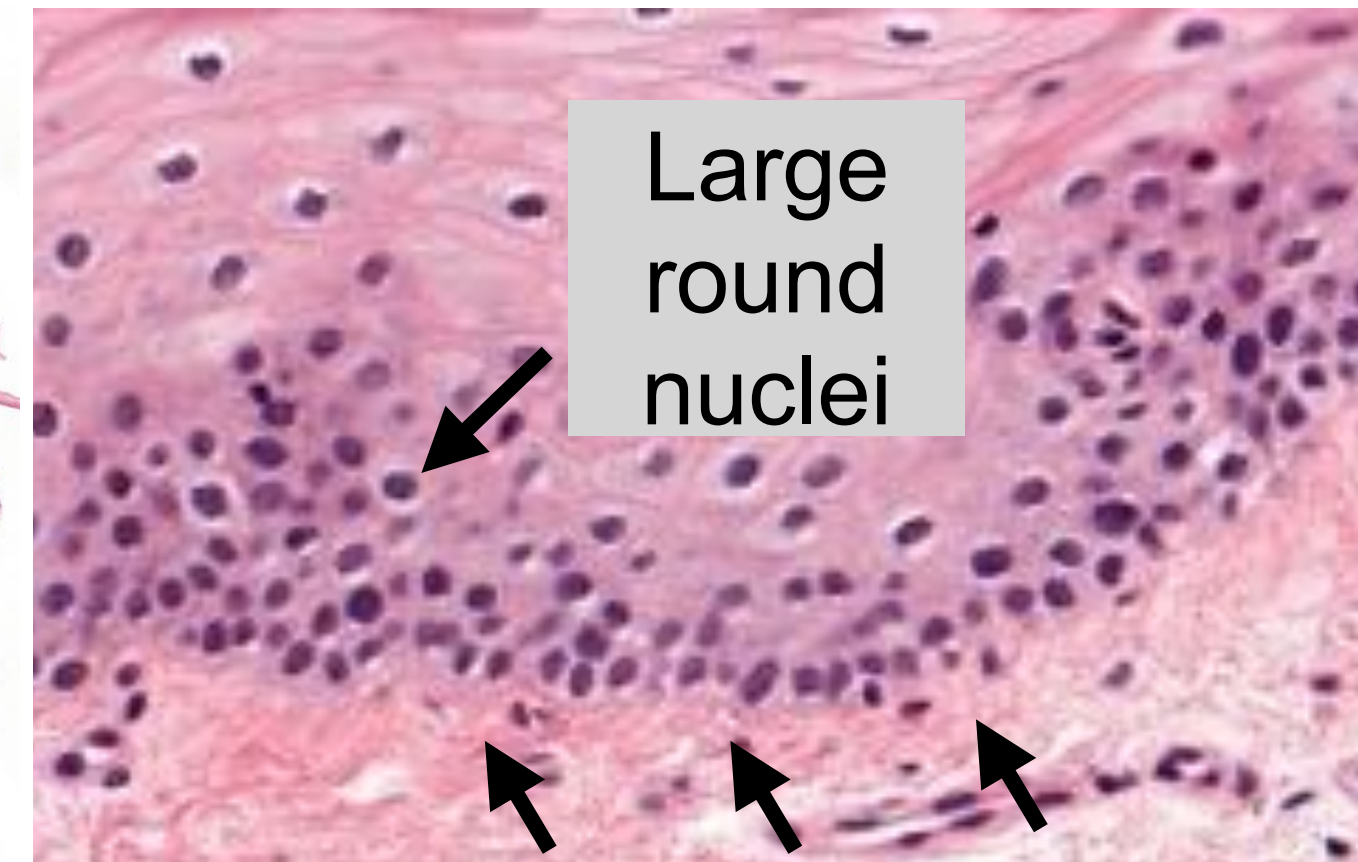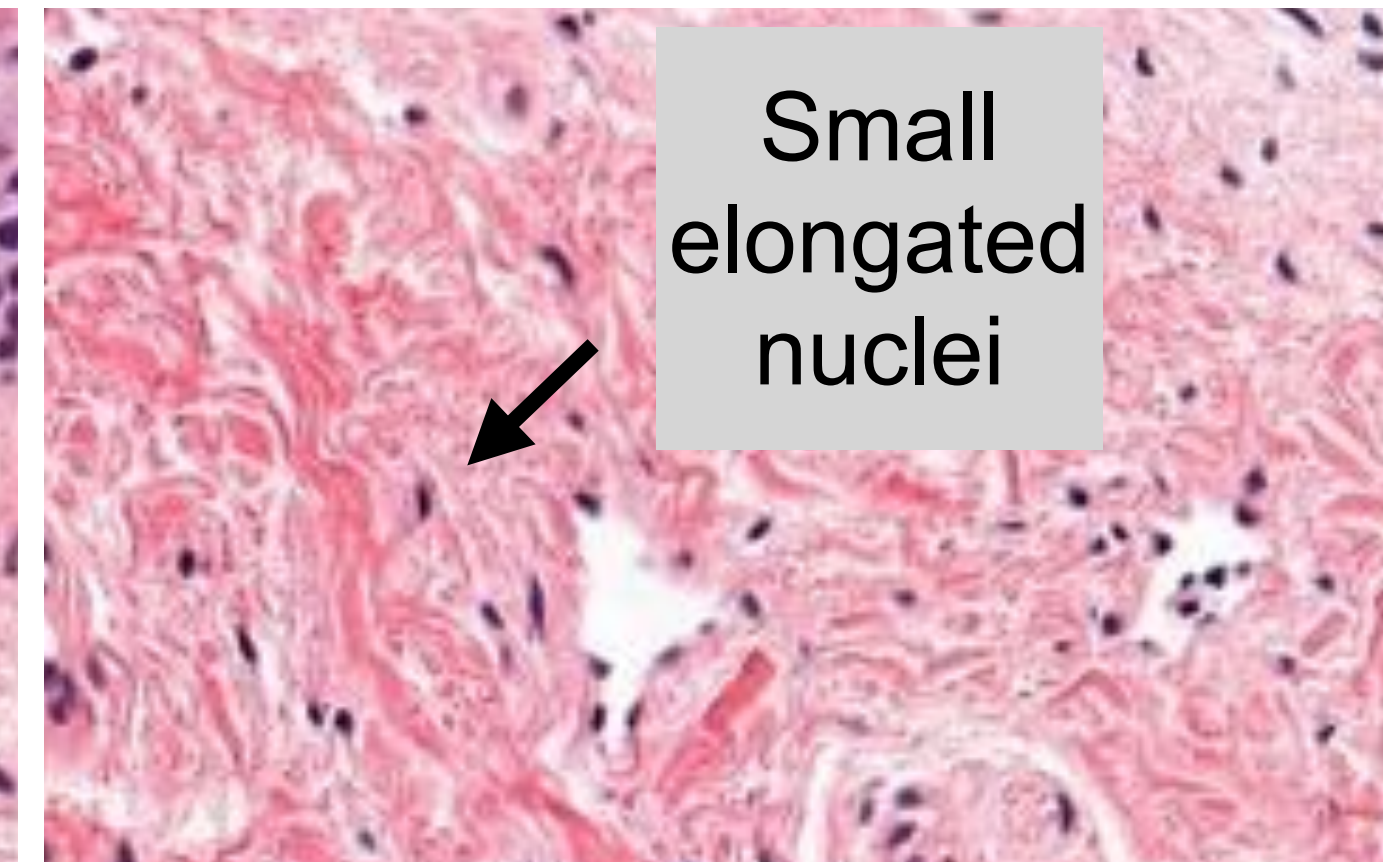

PARP1 stain

[PARP1 = brown  
staining]

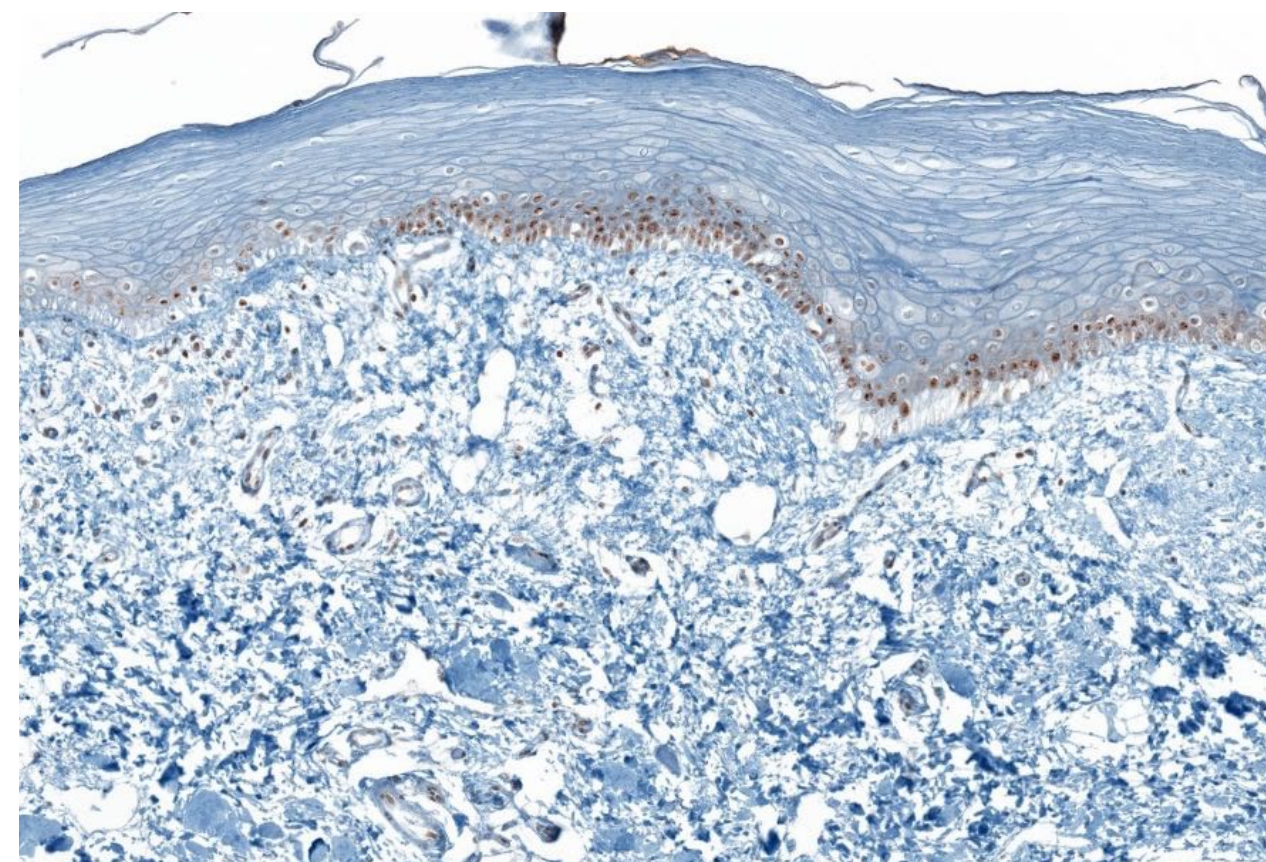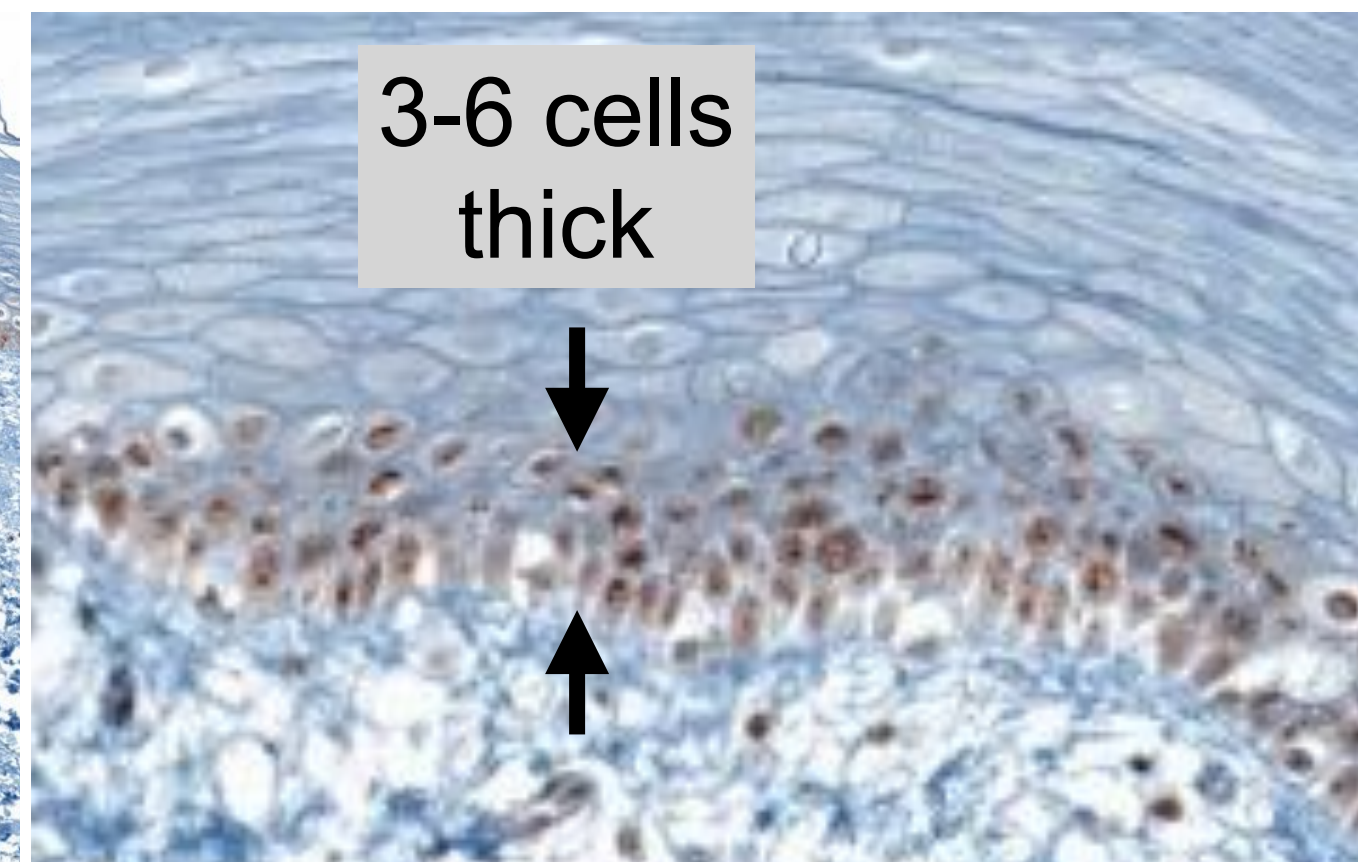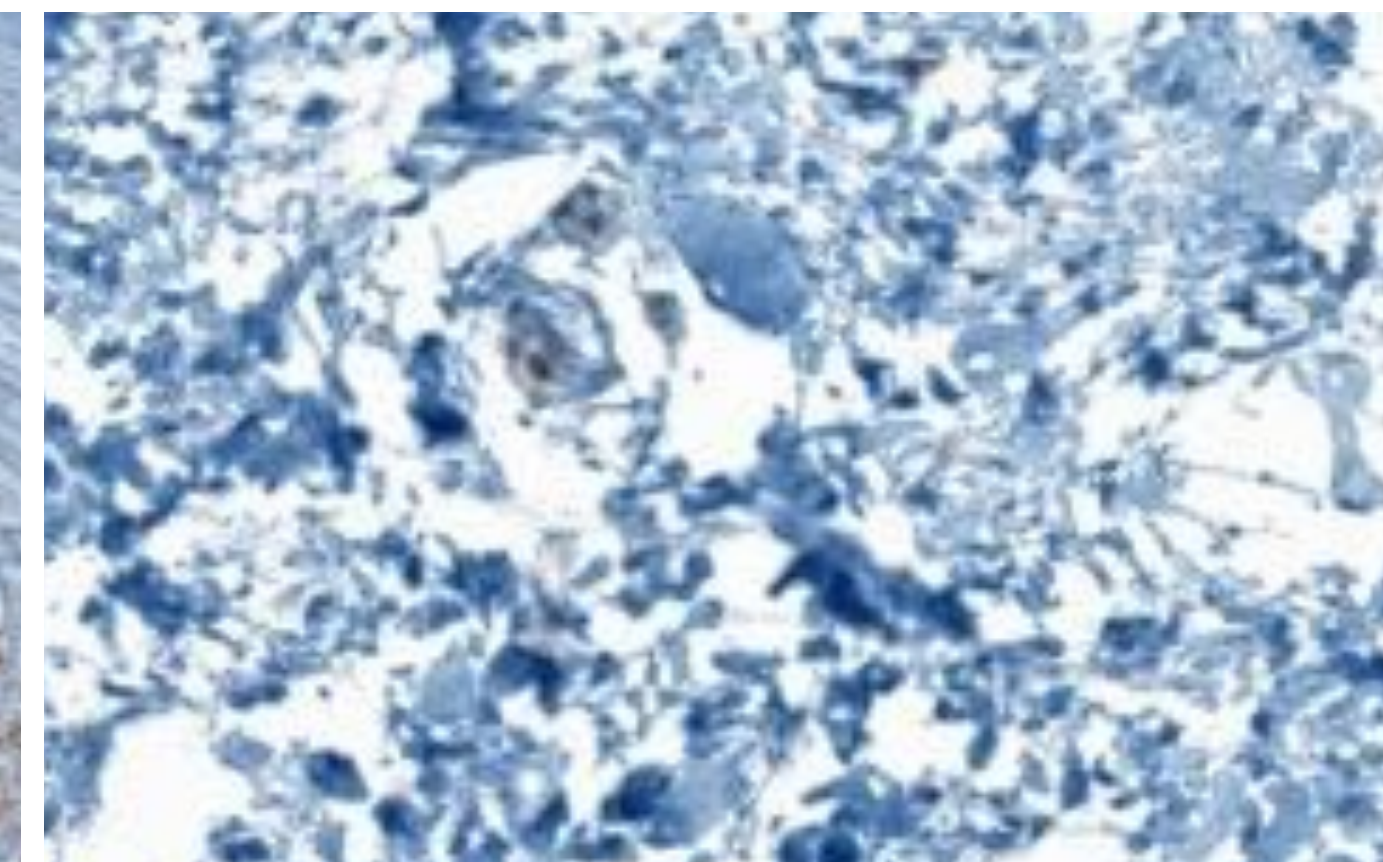

- PARP1 in basal layer
- PARP1 in large, round nuclei
- Thin layer of cells (3-6 cells)
- straight or arched line

- Nuclei smaller and elongated compared to epidermis



# Margin [2]

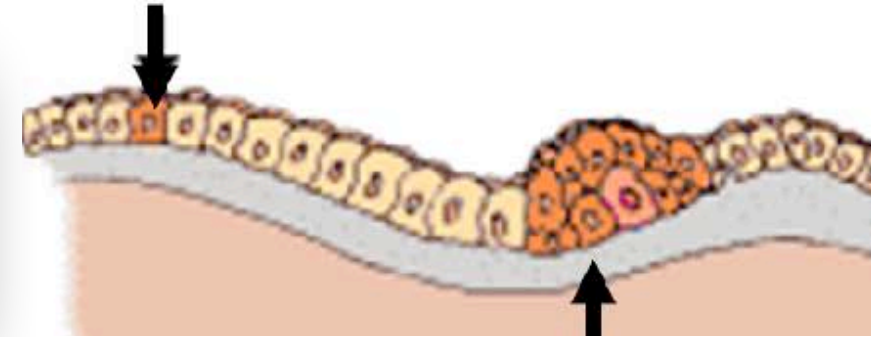

## PARP1 stain

[PARP1 = brown staining]

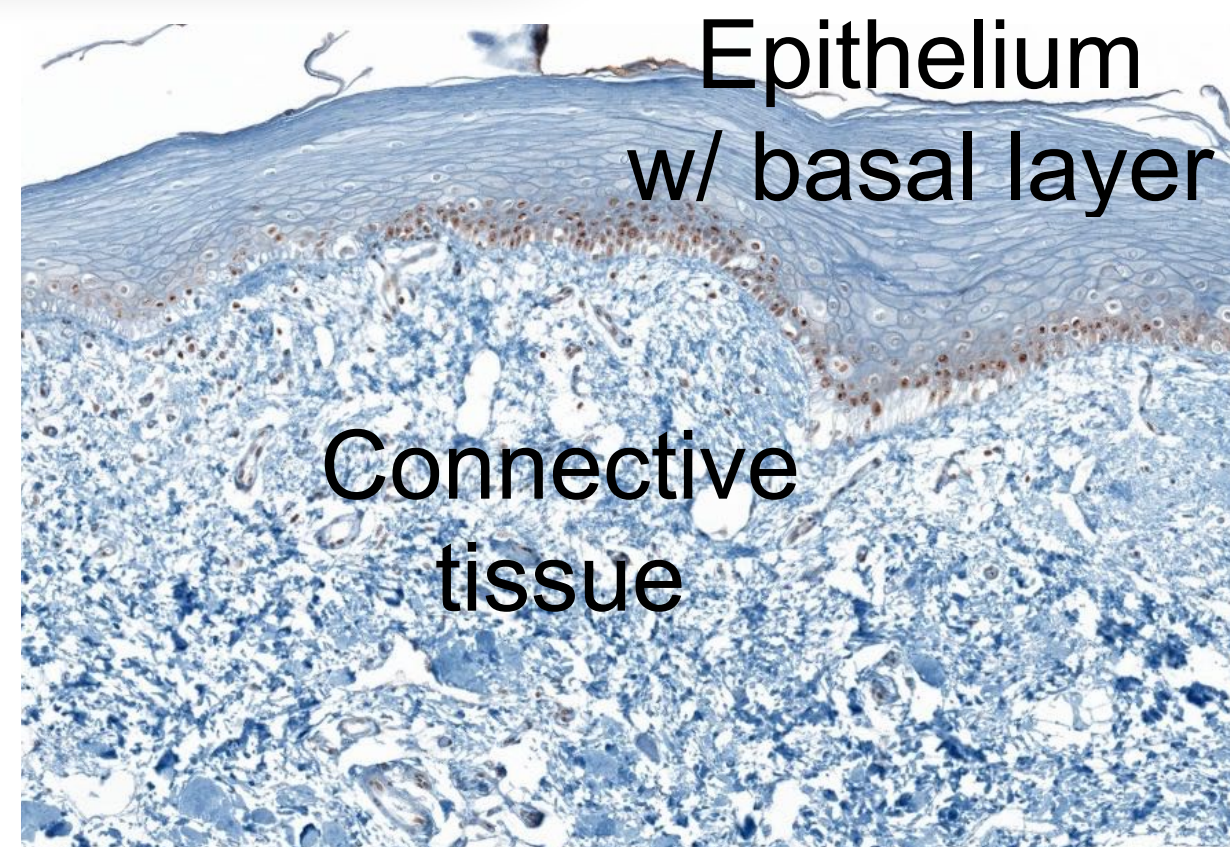

## Basal layer

3-6 cells thick

Large round nuclei

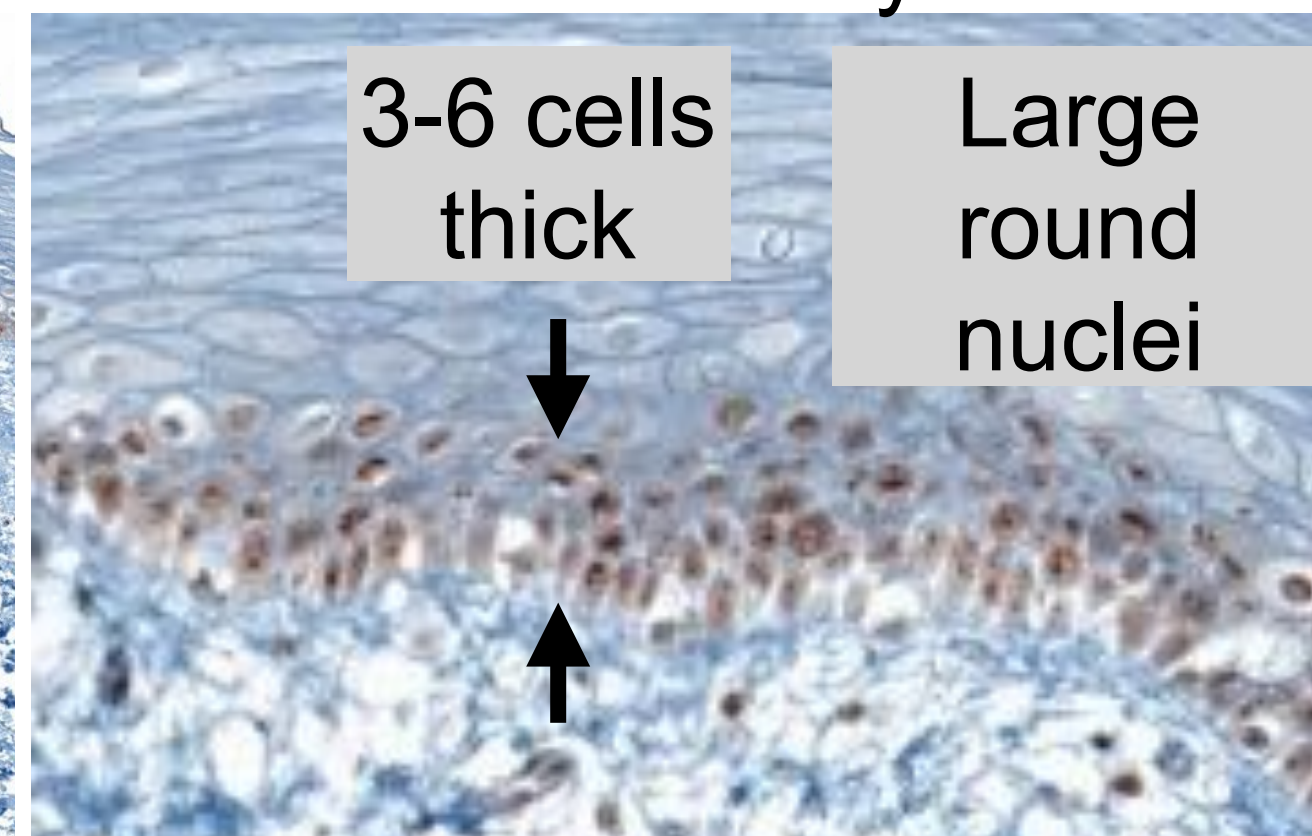

## Connective tissue

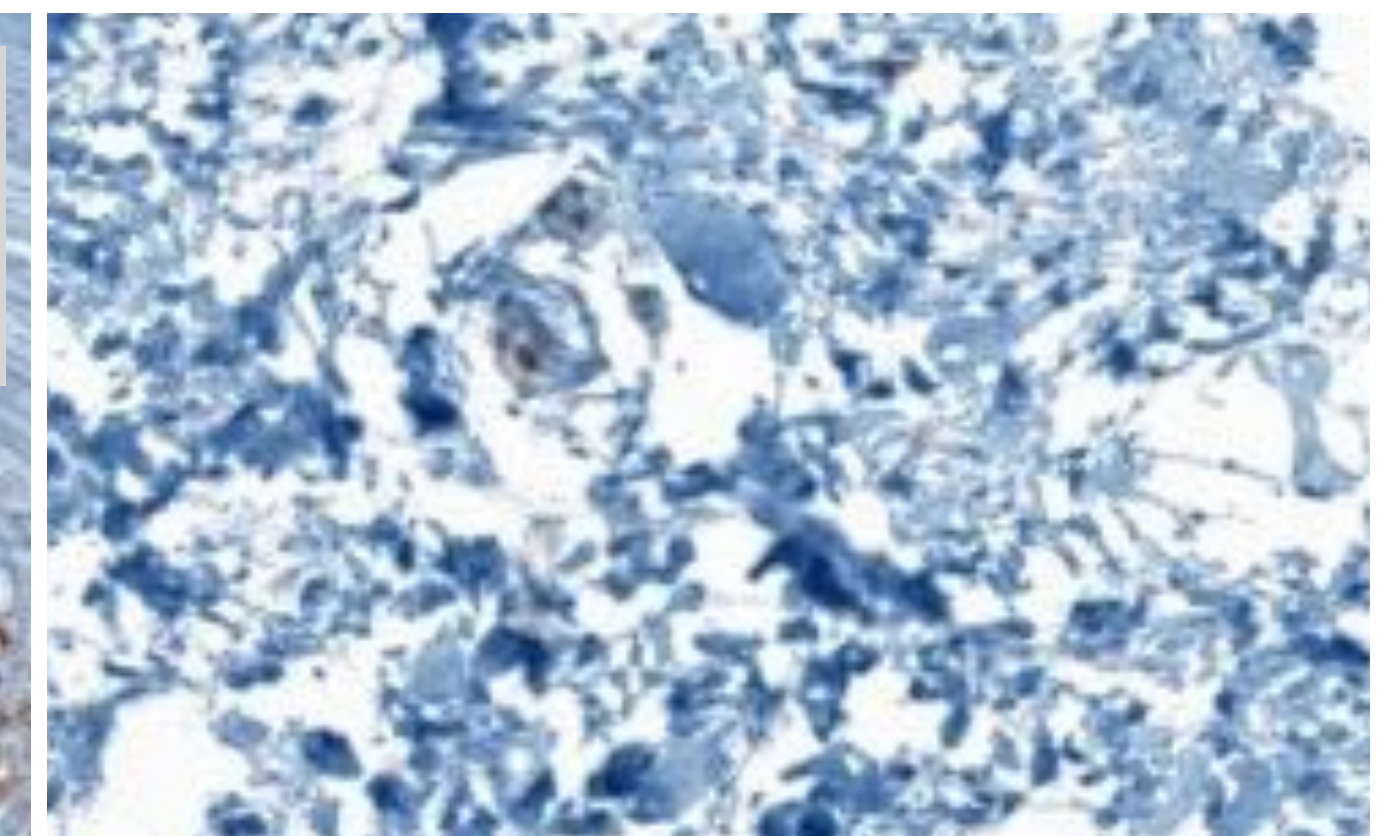

## PARPi-FL

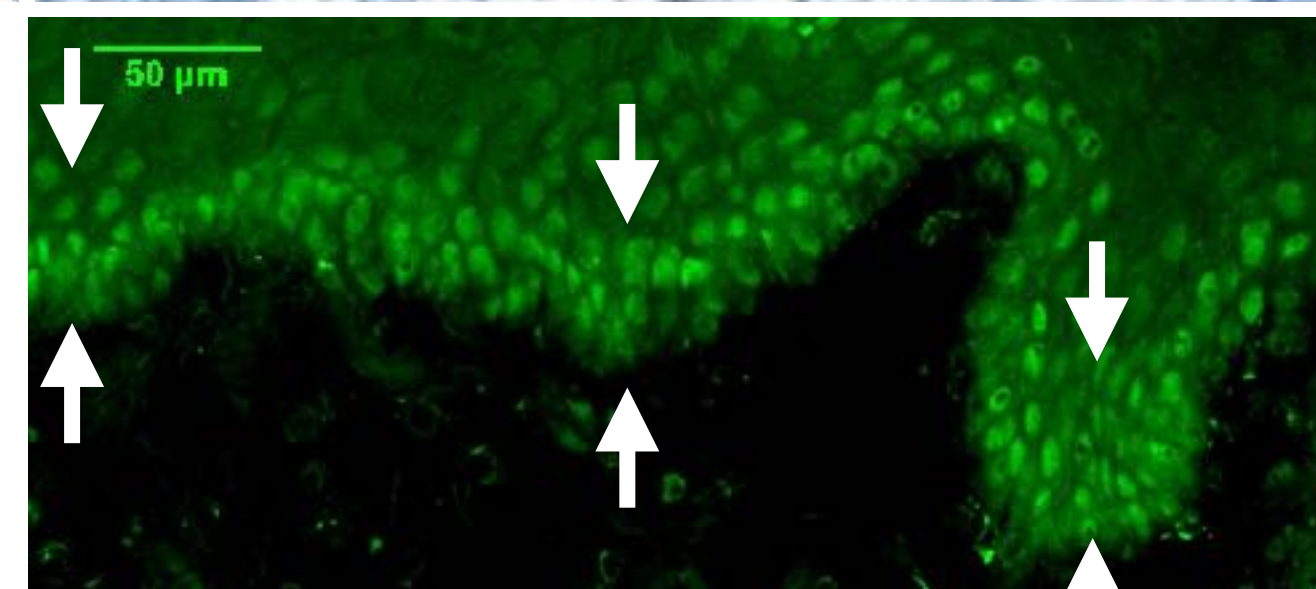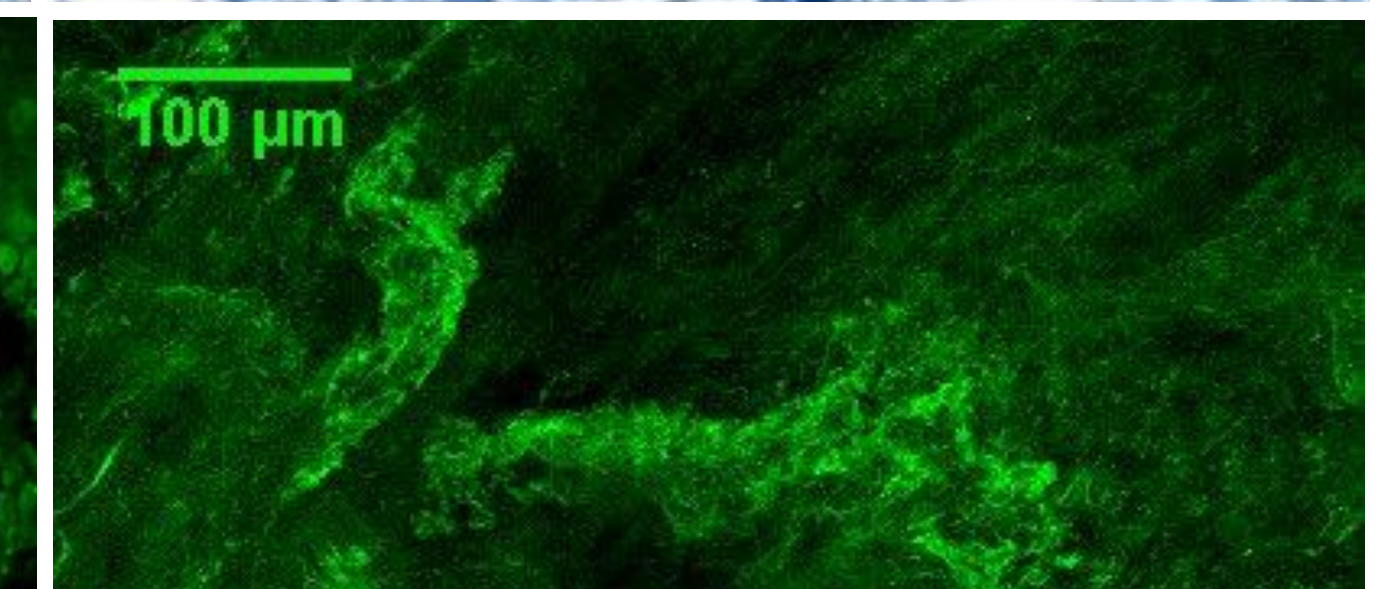

- ▶ PARP-FL related fluorescence confined to basal layer
- ▶ Fluorescence in large, round cell nuclei
- ▶ Straight or arched basal layer

- ▶ Connective tissue can have quite high autofluorescence (AF)
- ▶ AF is flat, uniform fluorescence with sometime very bright streaks
- ▶ No round shapes/cell nuclei!
- ▶ Not indicative if tissue is tumor or margin!



# Tumor

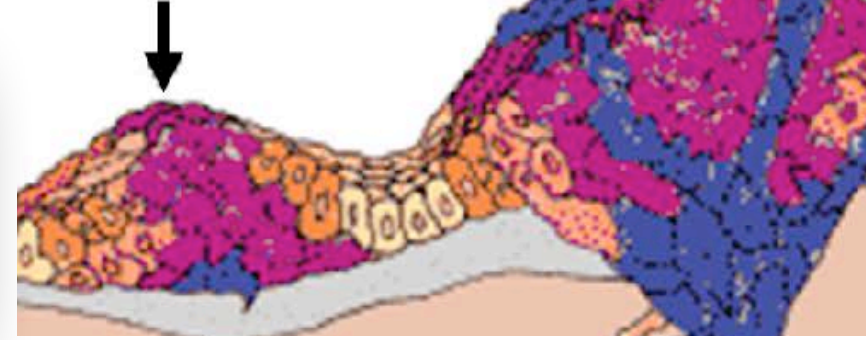

Basal layer

Connective tissue

Morphological  
stain (H&E)

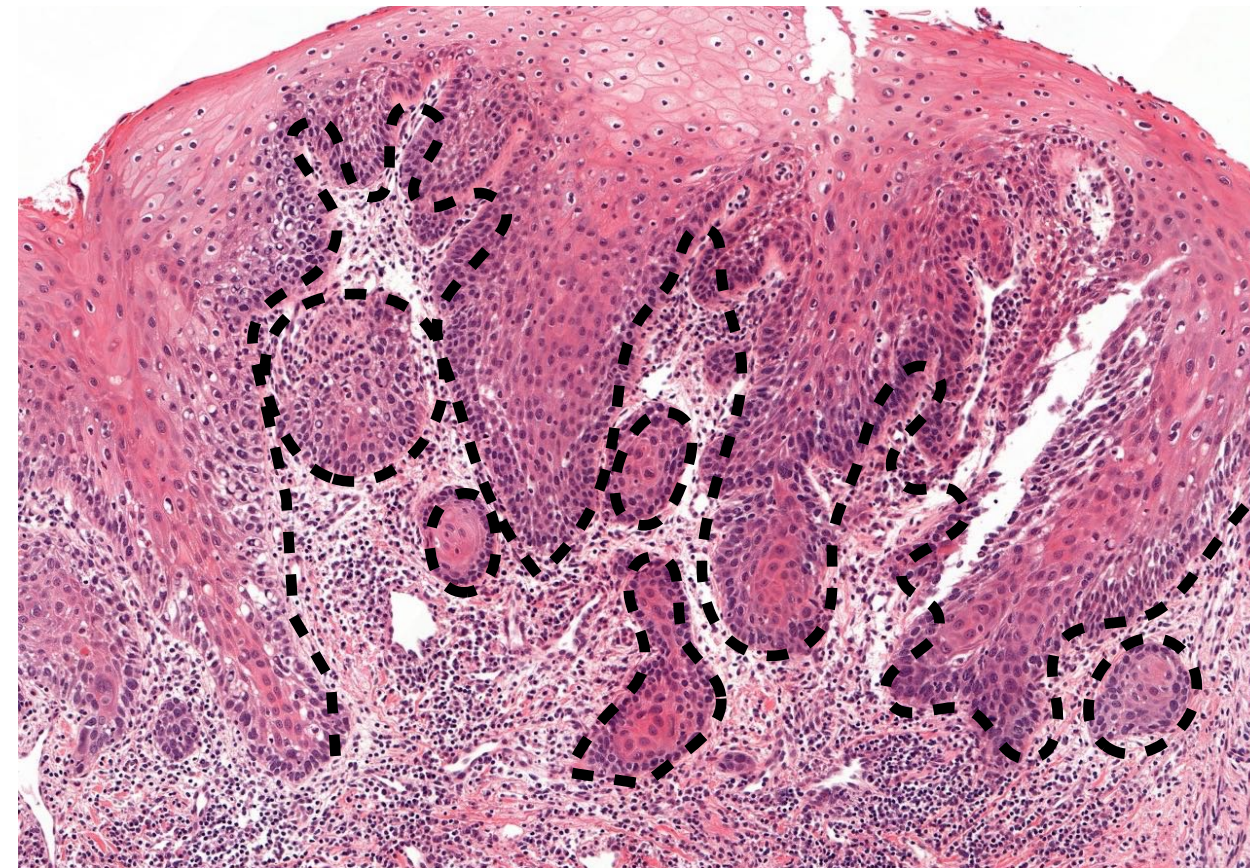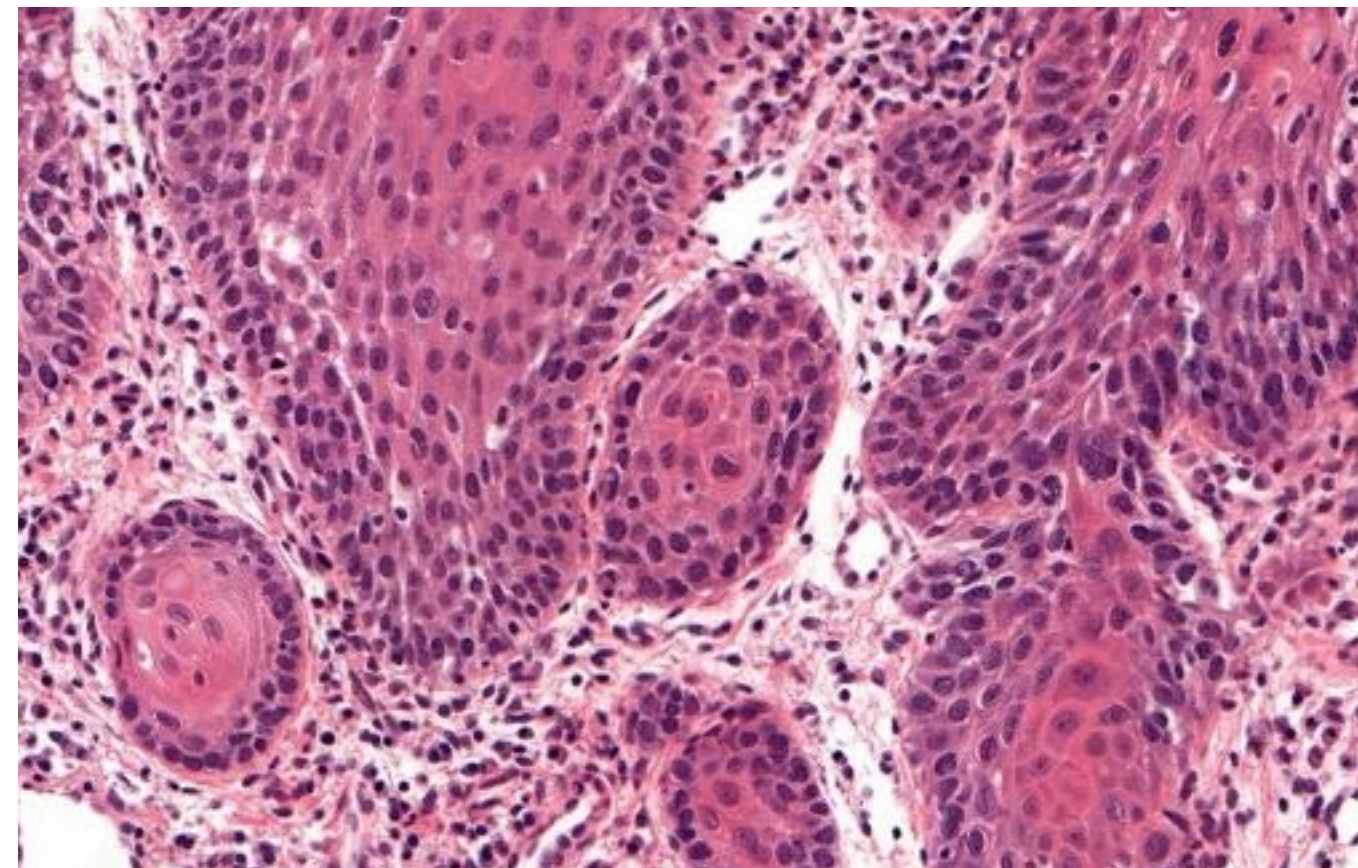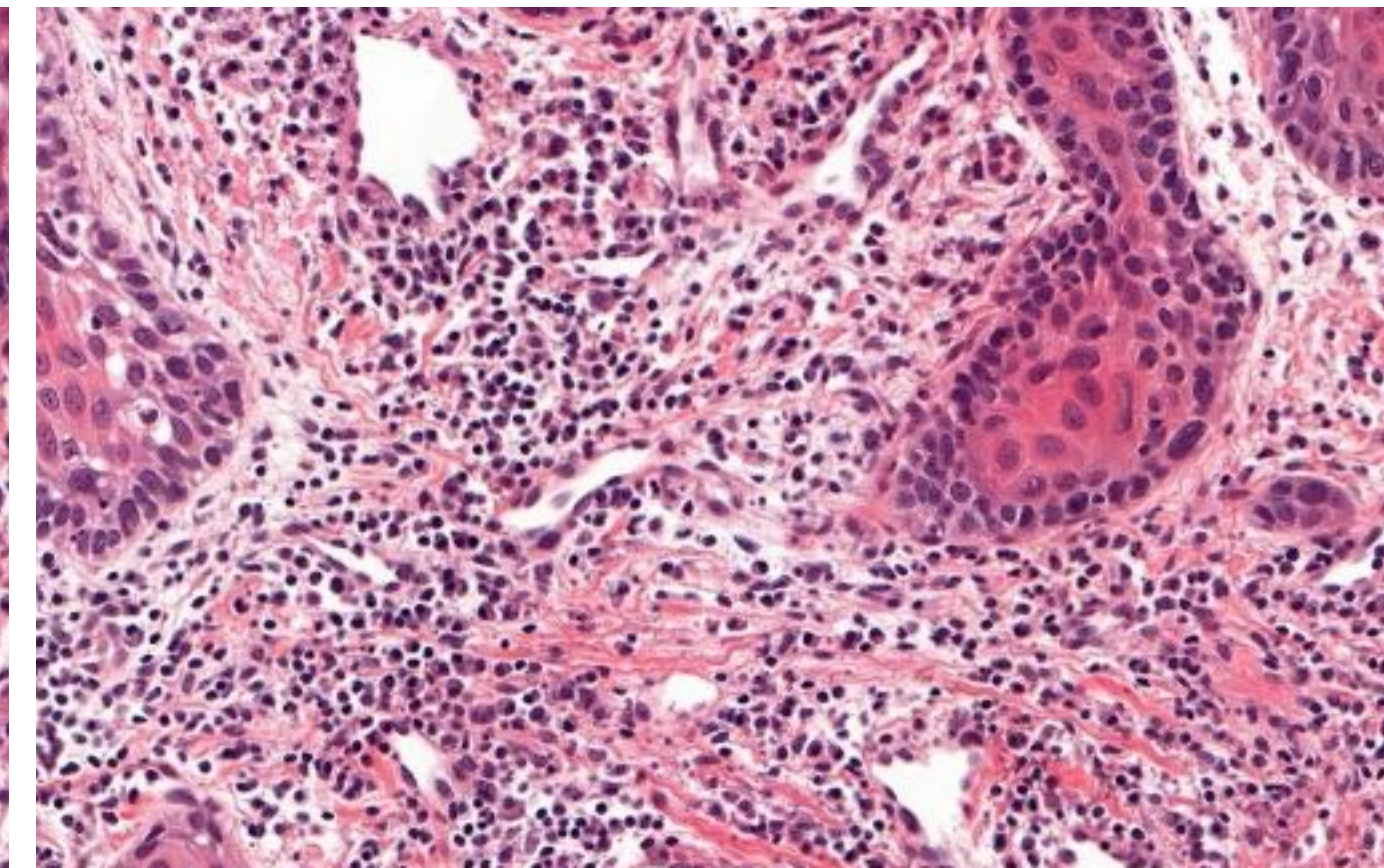

PARP1 stain

[PARP1 = brown  
staining]

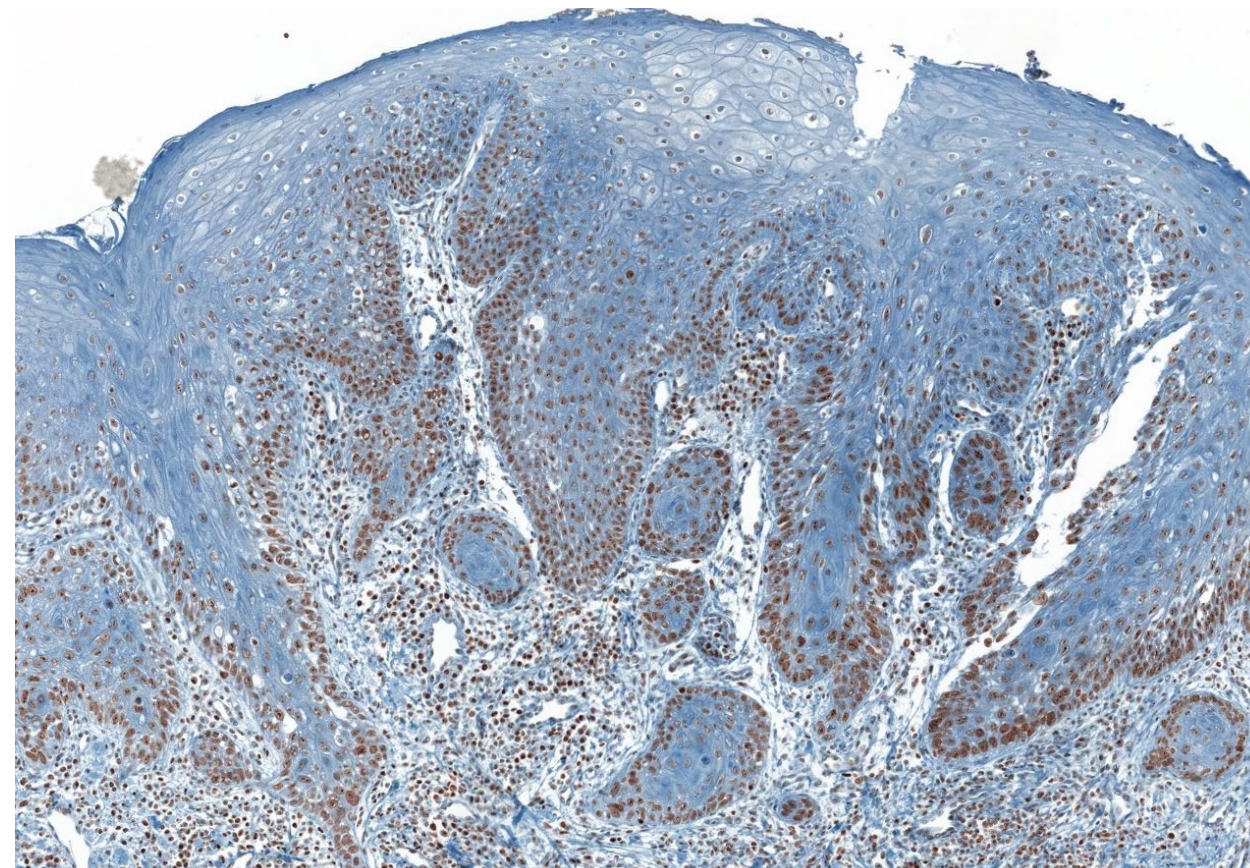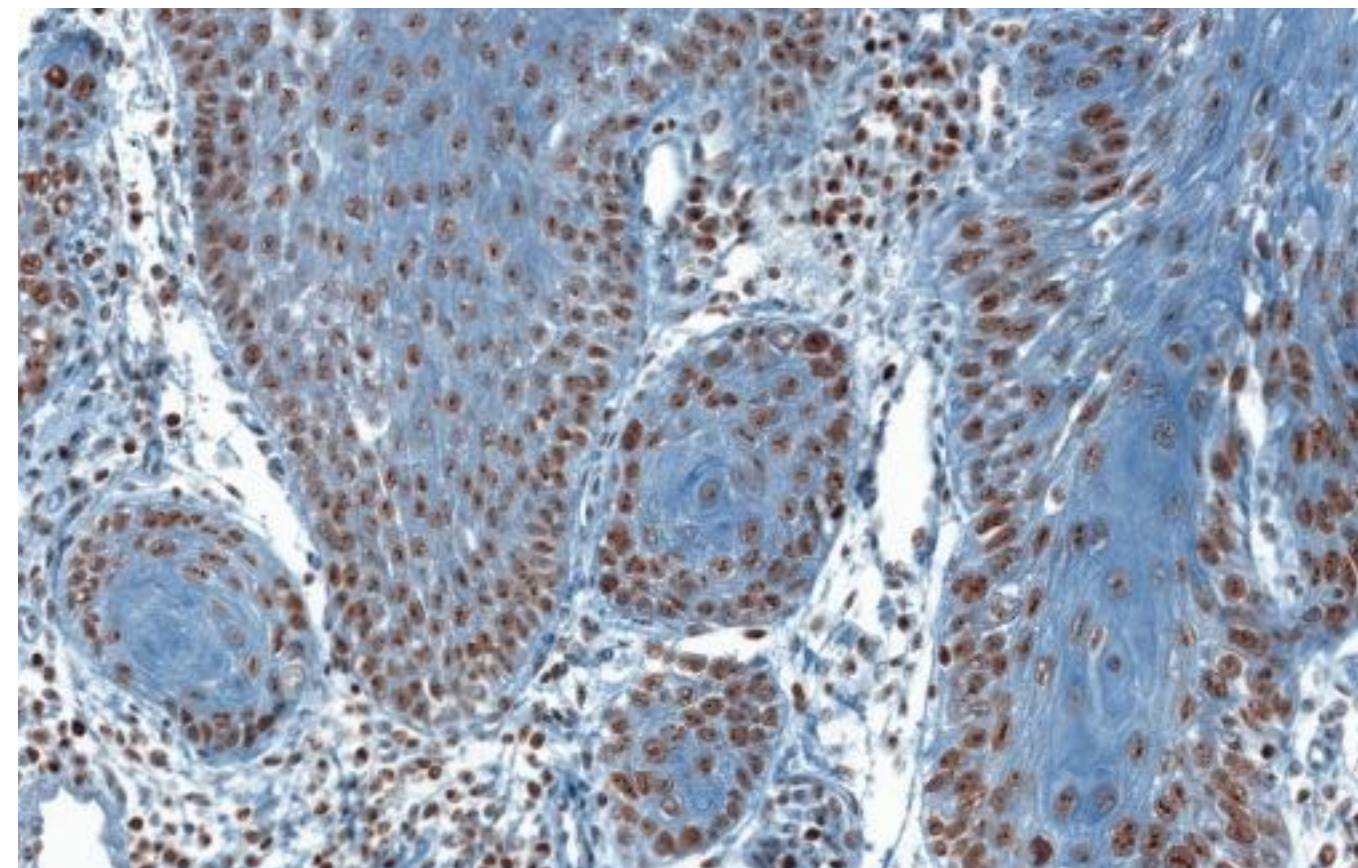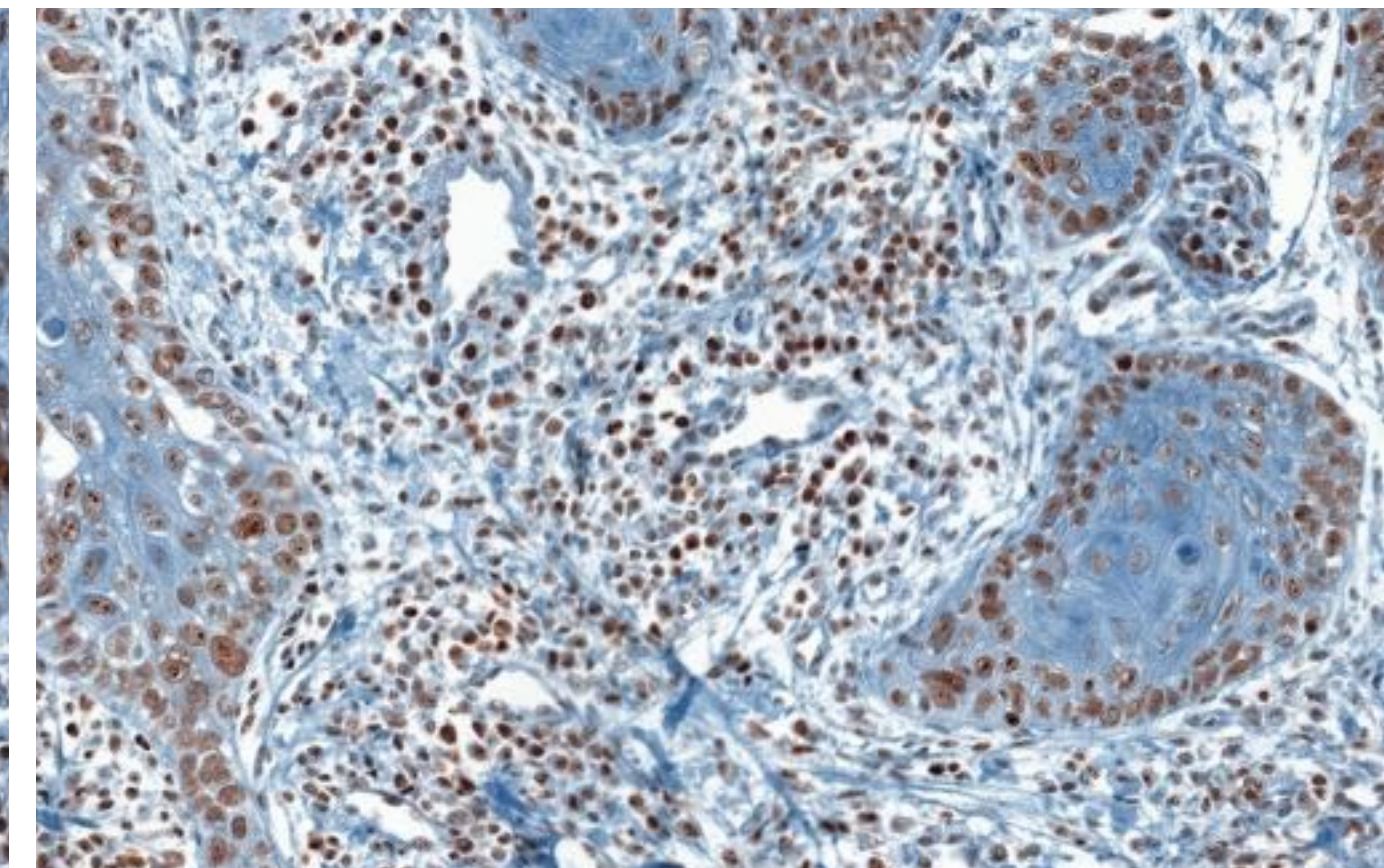

- ▶ Basal layer disorganized (extends into deeper layers)
- ▶ PARP1 in large, round nuclei outside of a basal layer like structure

- ▶ Tumor cells (round nuclei) can extend deep into the connective tissue



# Tumor



Basal layer

Connective tissue

## PARP1 stain

[PARP1 = brown staining]

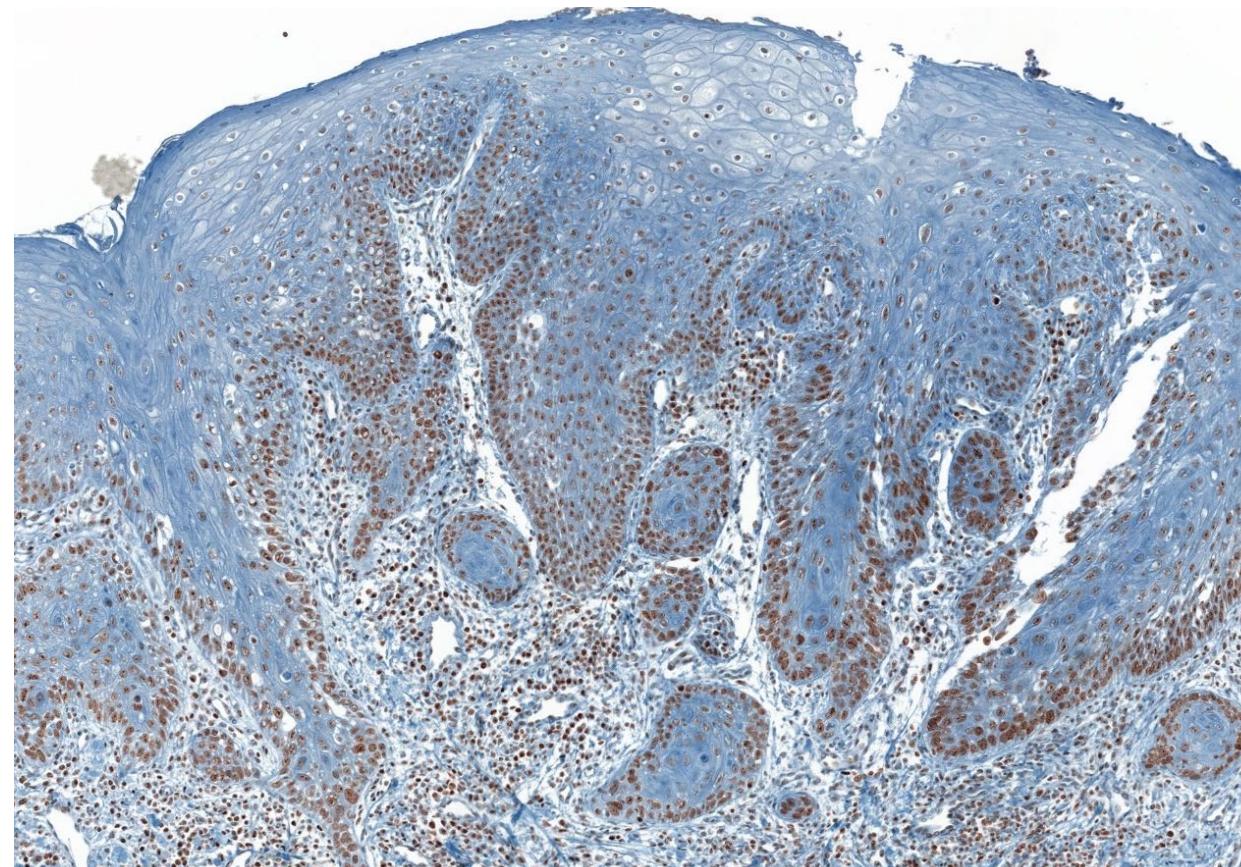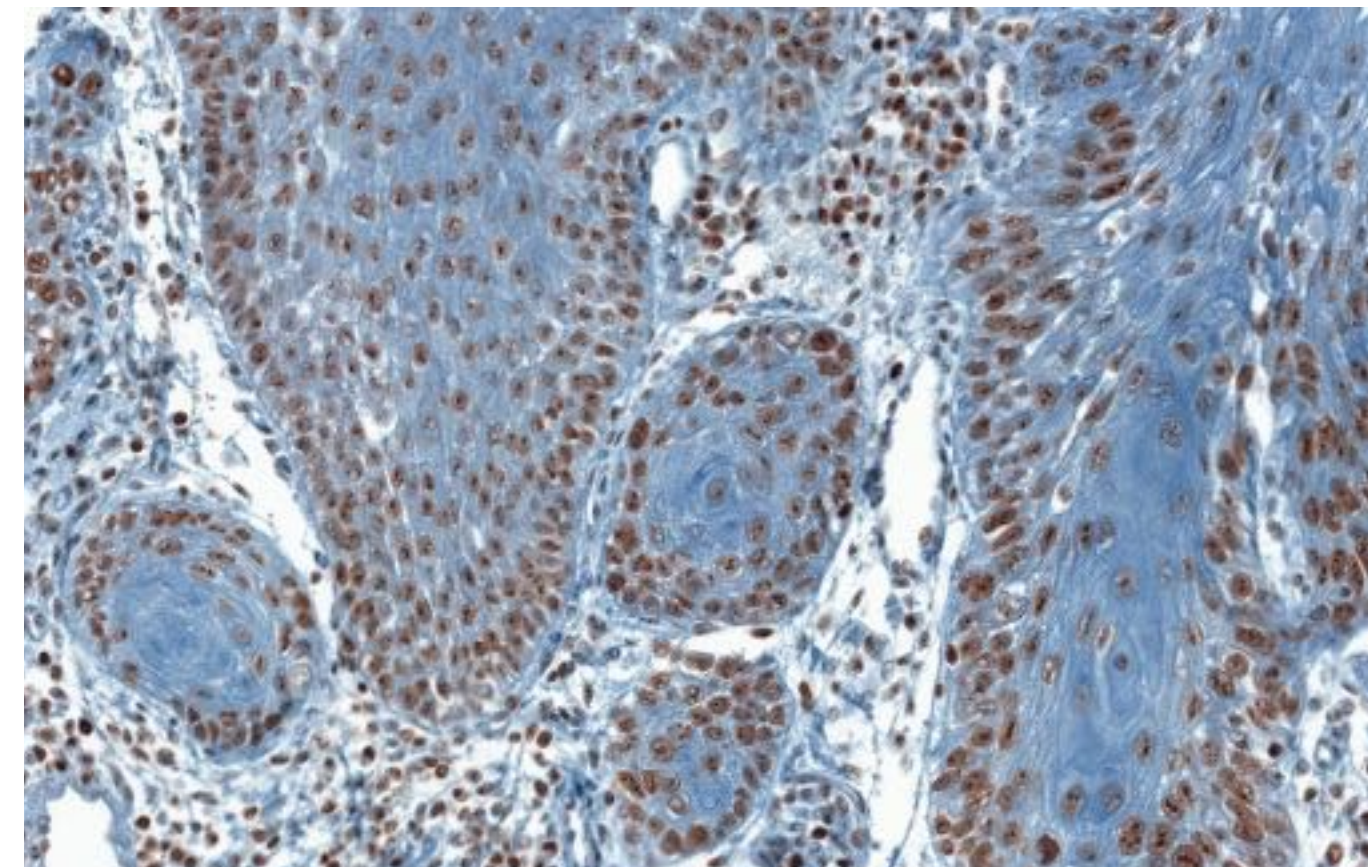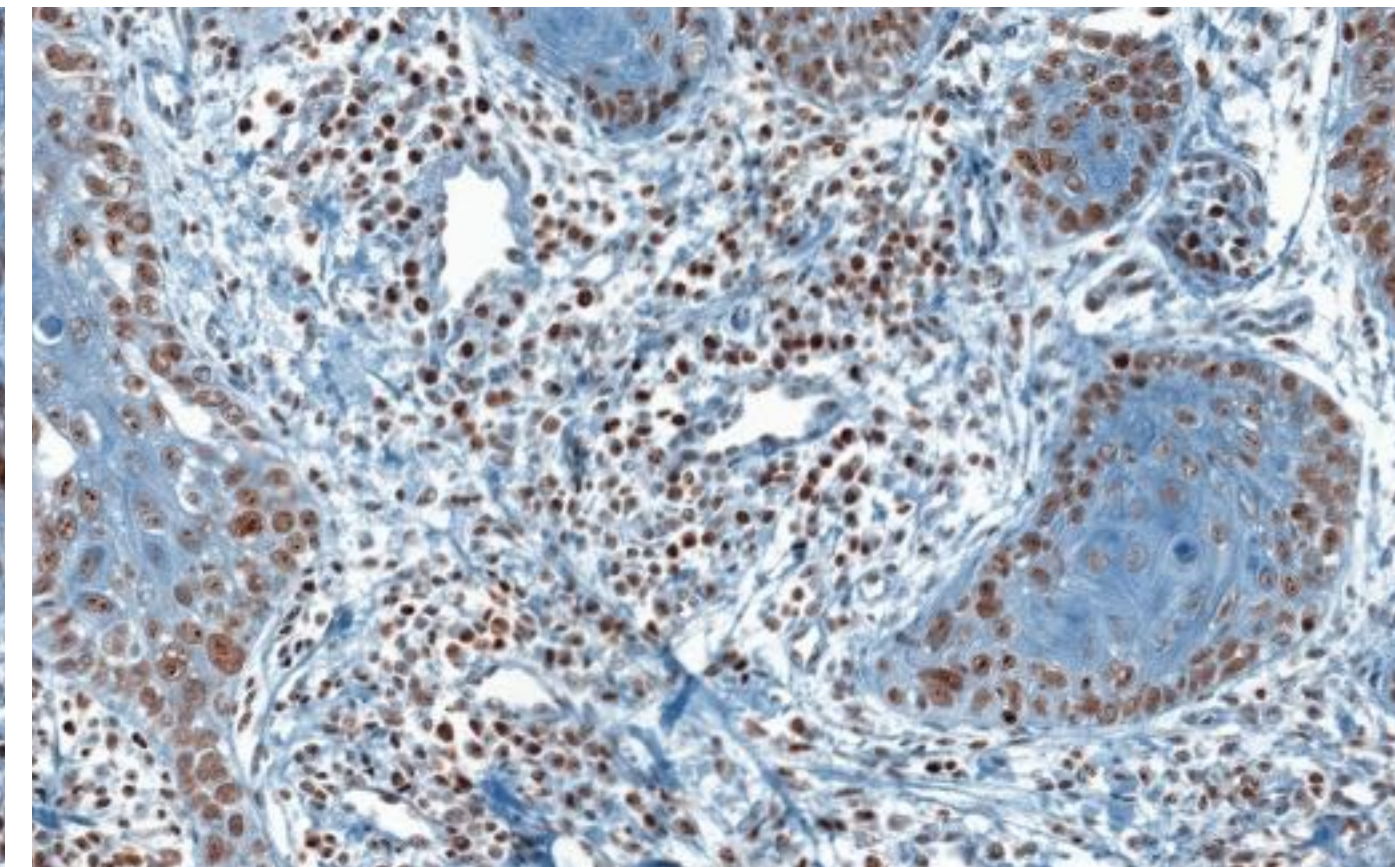

## PARPi-FL

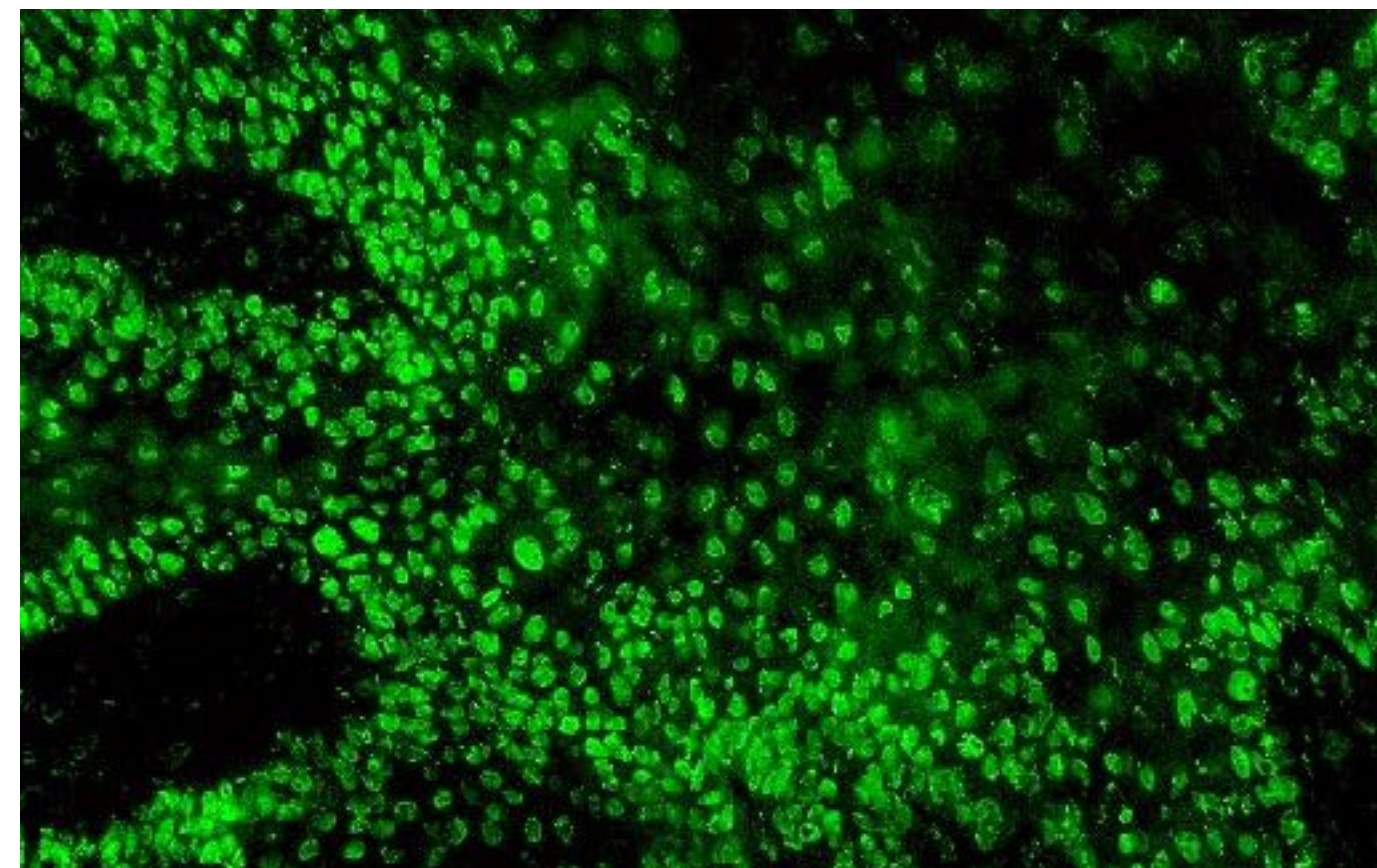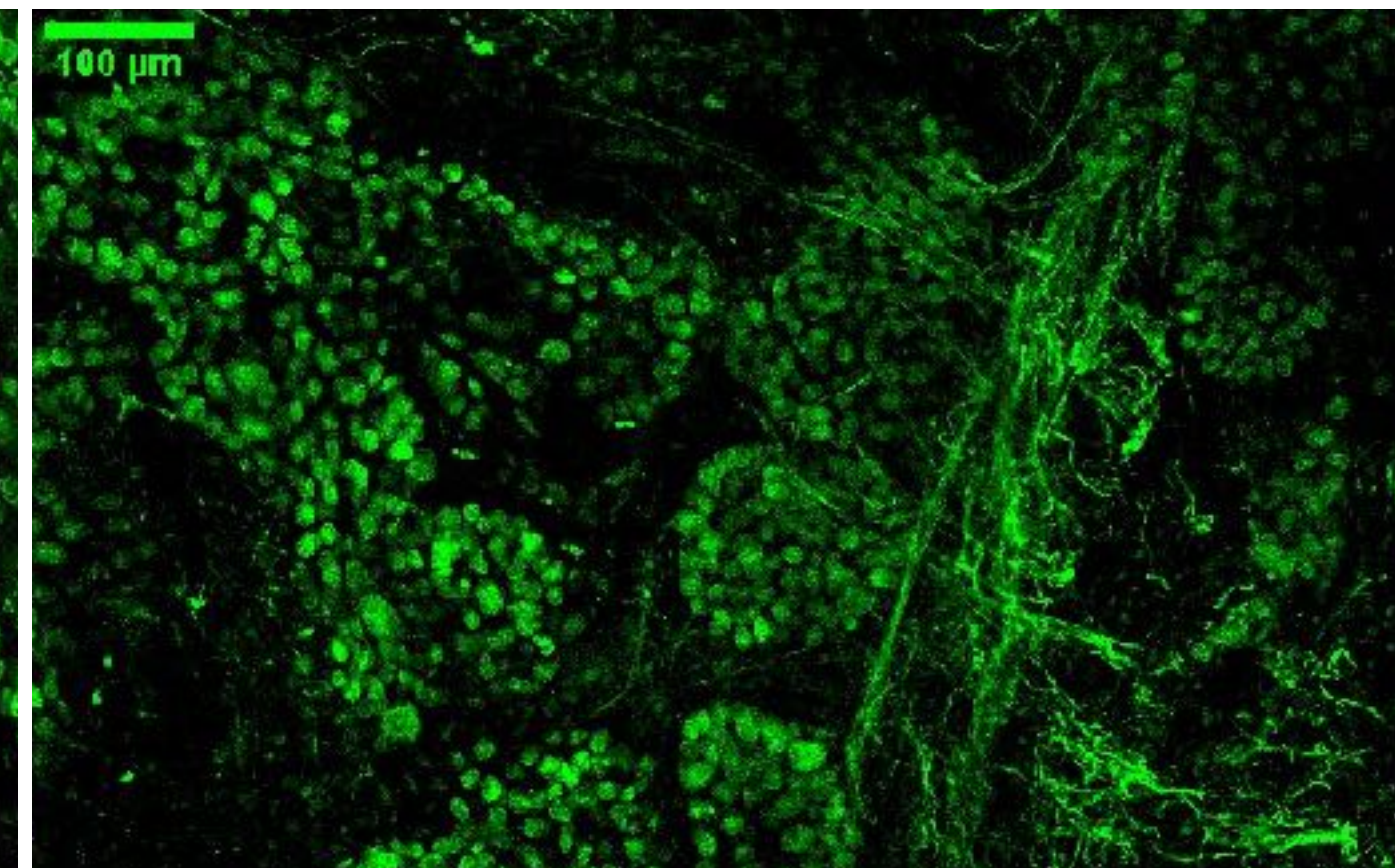

- PARPi-FL in round cells in more or less organized fashion
- Extension of green fluorescent cells beyond a thin basal layer indicates tumor

- Tumor cells (round nuclei) can extend deep into the connective tissue
- Structures with strong AF present (areal, flat fluorescence or bright streaks)



# Autofluorescence

**Green only:**  
PARPi-FL: green  
AF: green

**Overlay:**  
PARPi-FL: green  
AF: red/yellow

## Most important characteristics

### Tumor

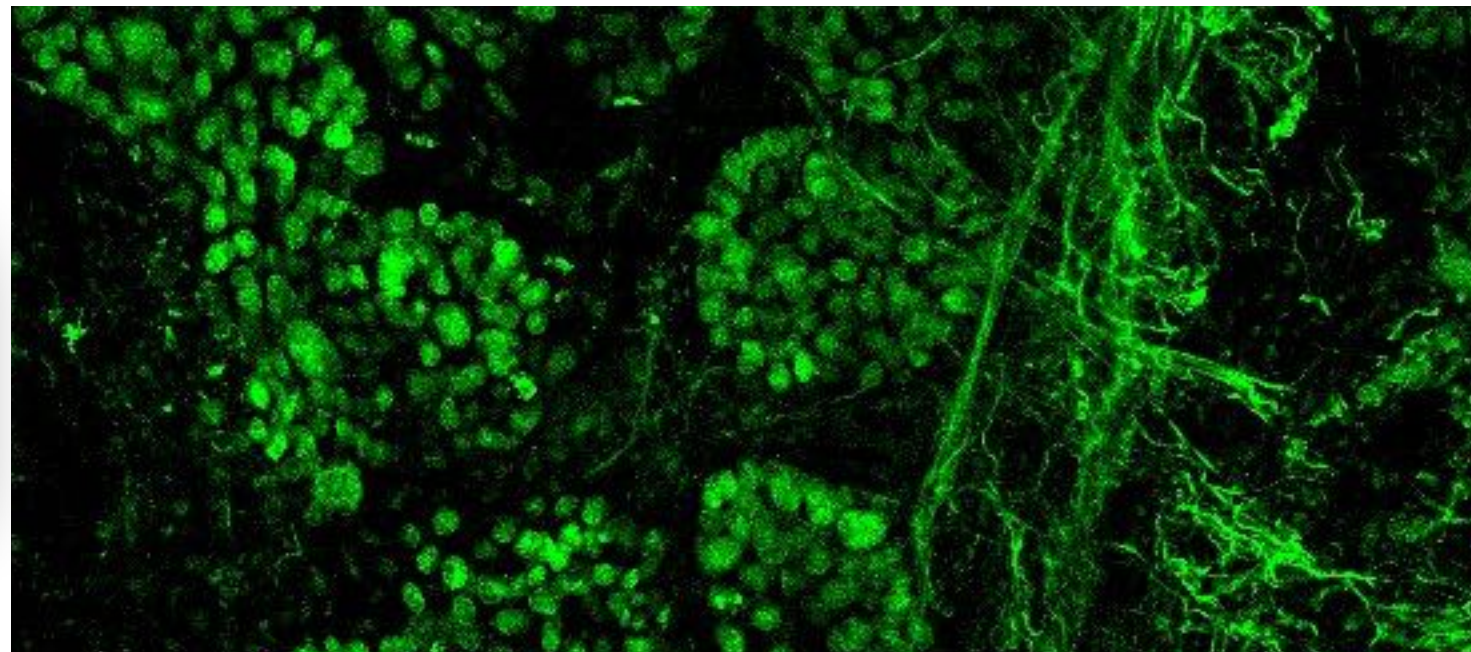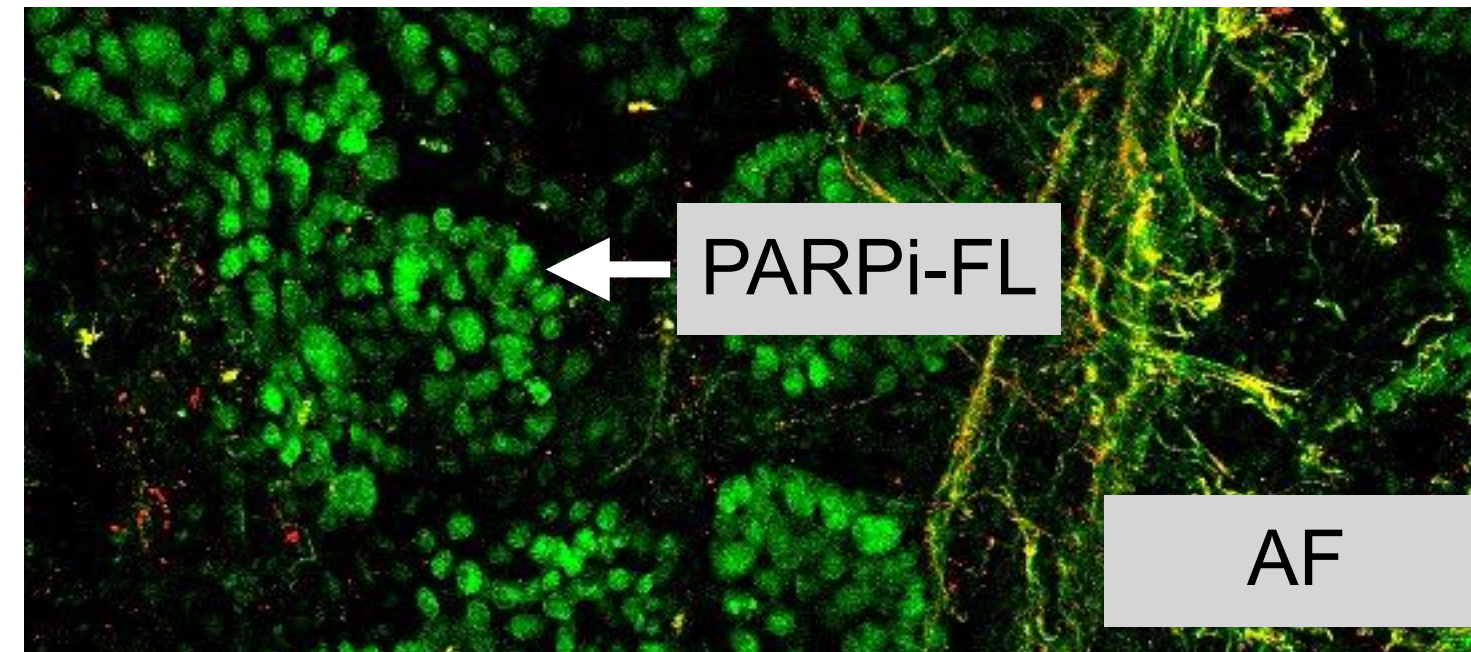

- PARPi-FL stained large, round cells beyond basal layer (**MUST** be present)
- AF **CAN** be present

### Margin

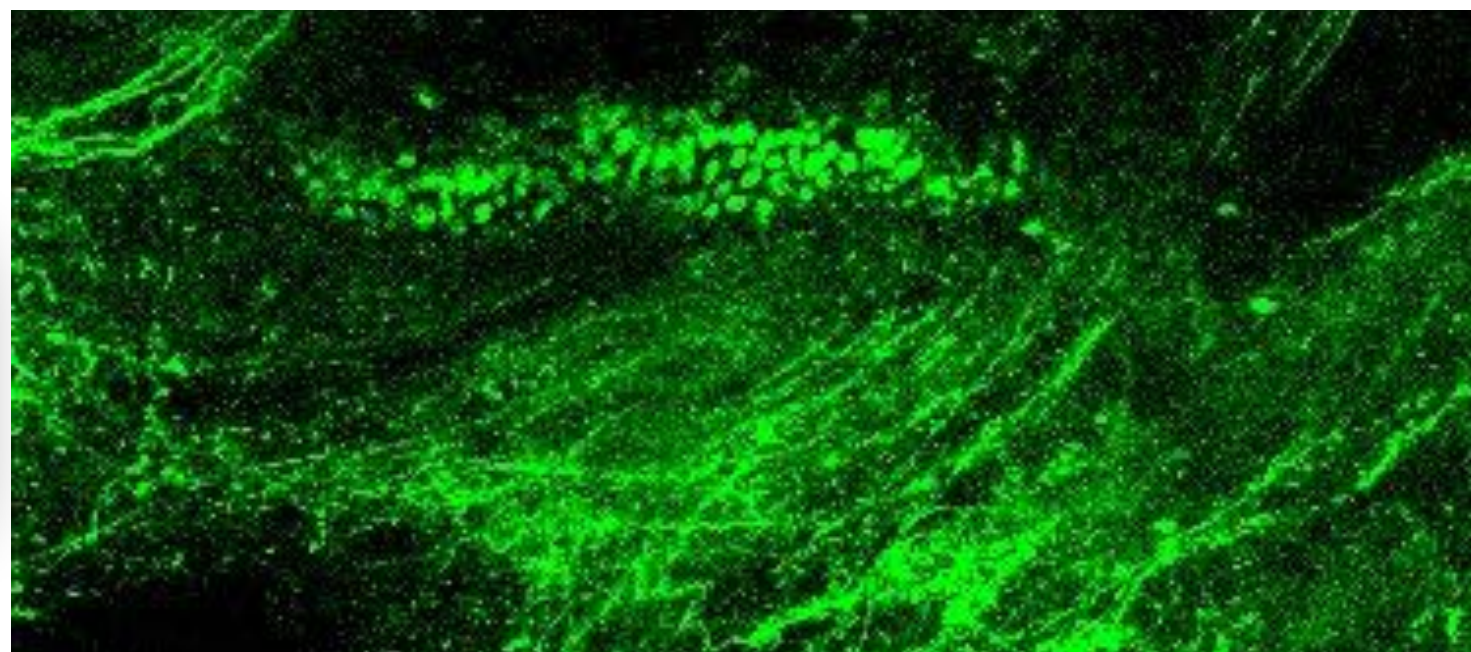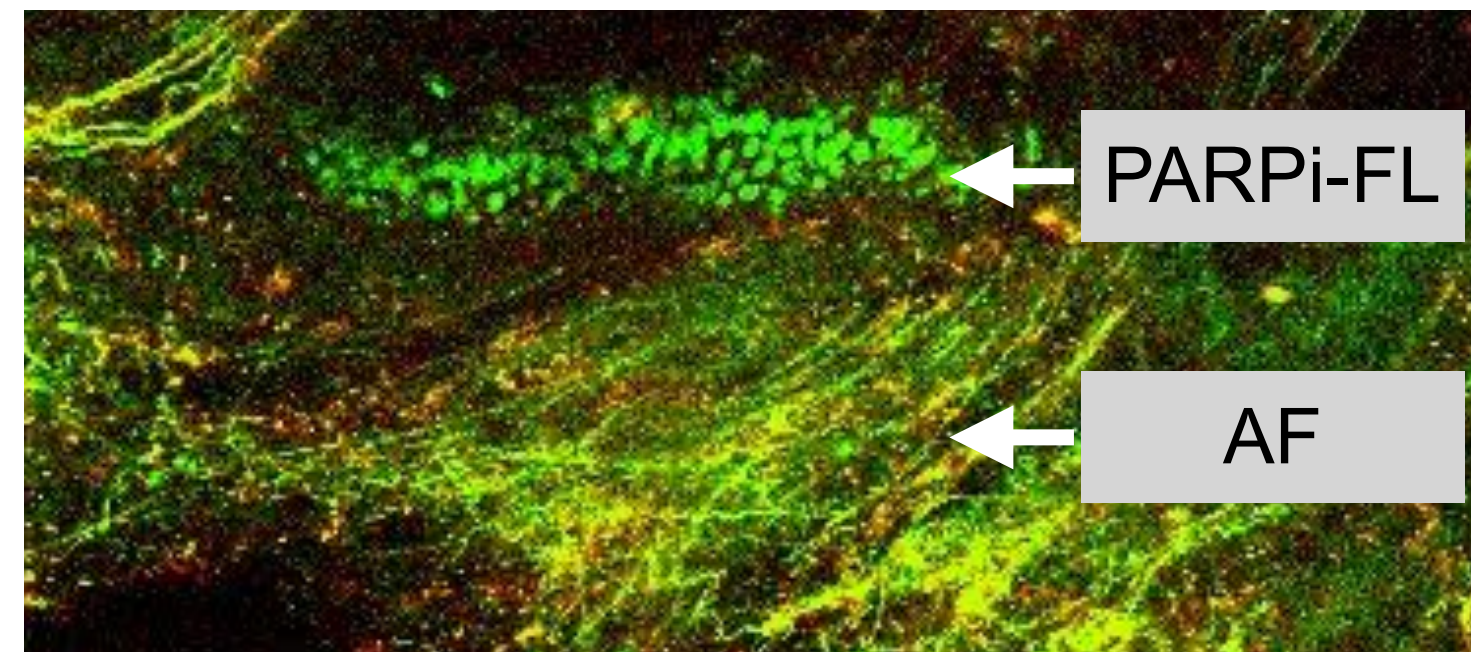

- Thin, regular basal layer with PARPi-FL stained cells (<6 cell layers) **CAN** be present
- AF **CAN** be present

- ➡ Round cells: PARPi-FL
- ➡ flat/area/streak stained: Autofluorescence

- ➡ Green round cells: PARPi-FL
- ➡ red/yellow signals: Autofluorescence (not diagnostic/ does not help to decide if a tissue is tumor or margin)



# Tumor

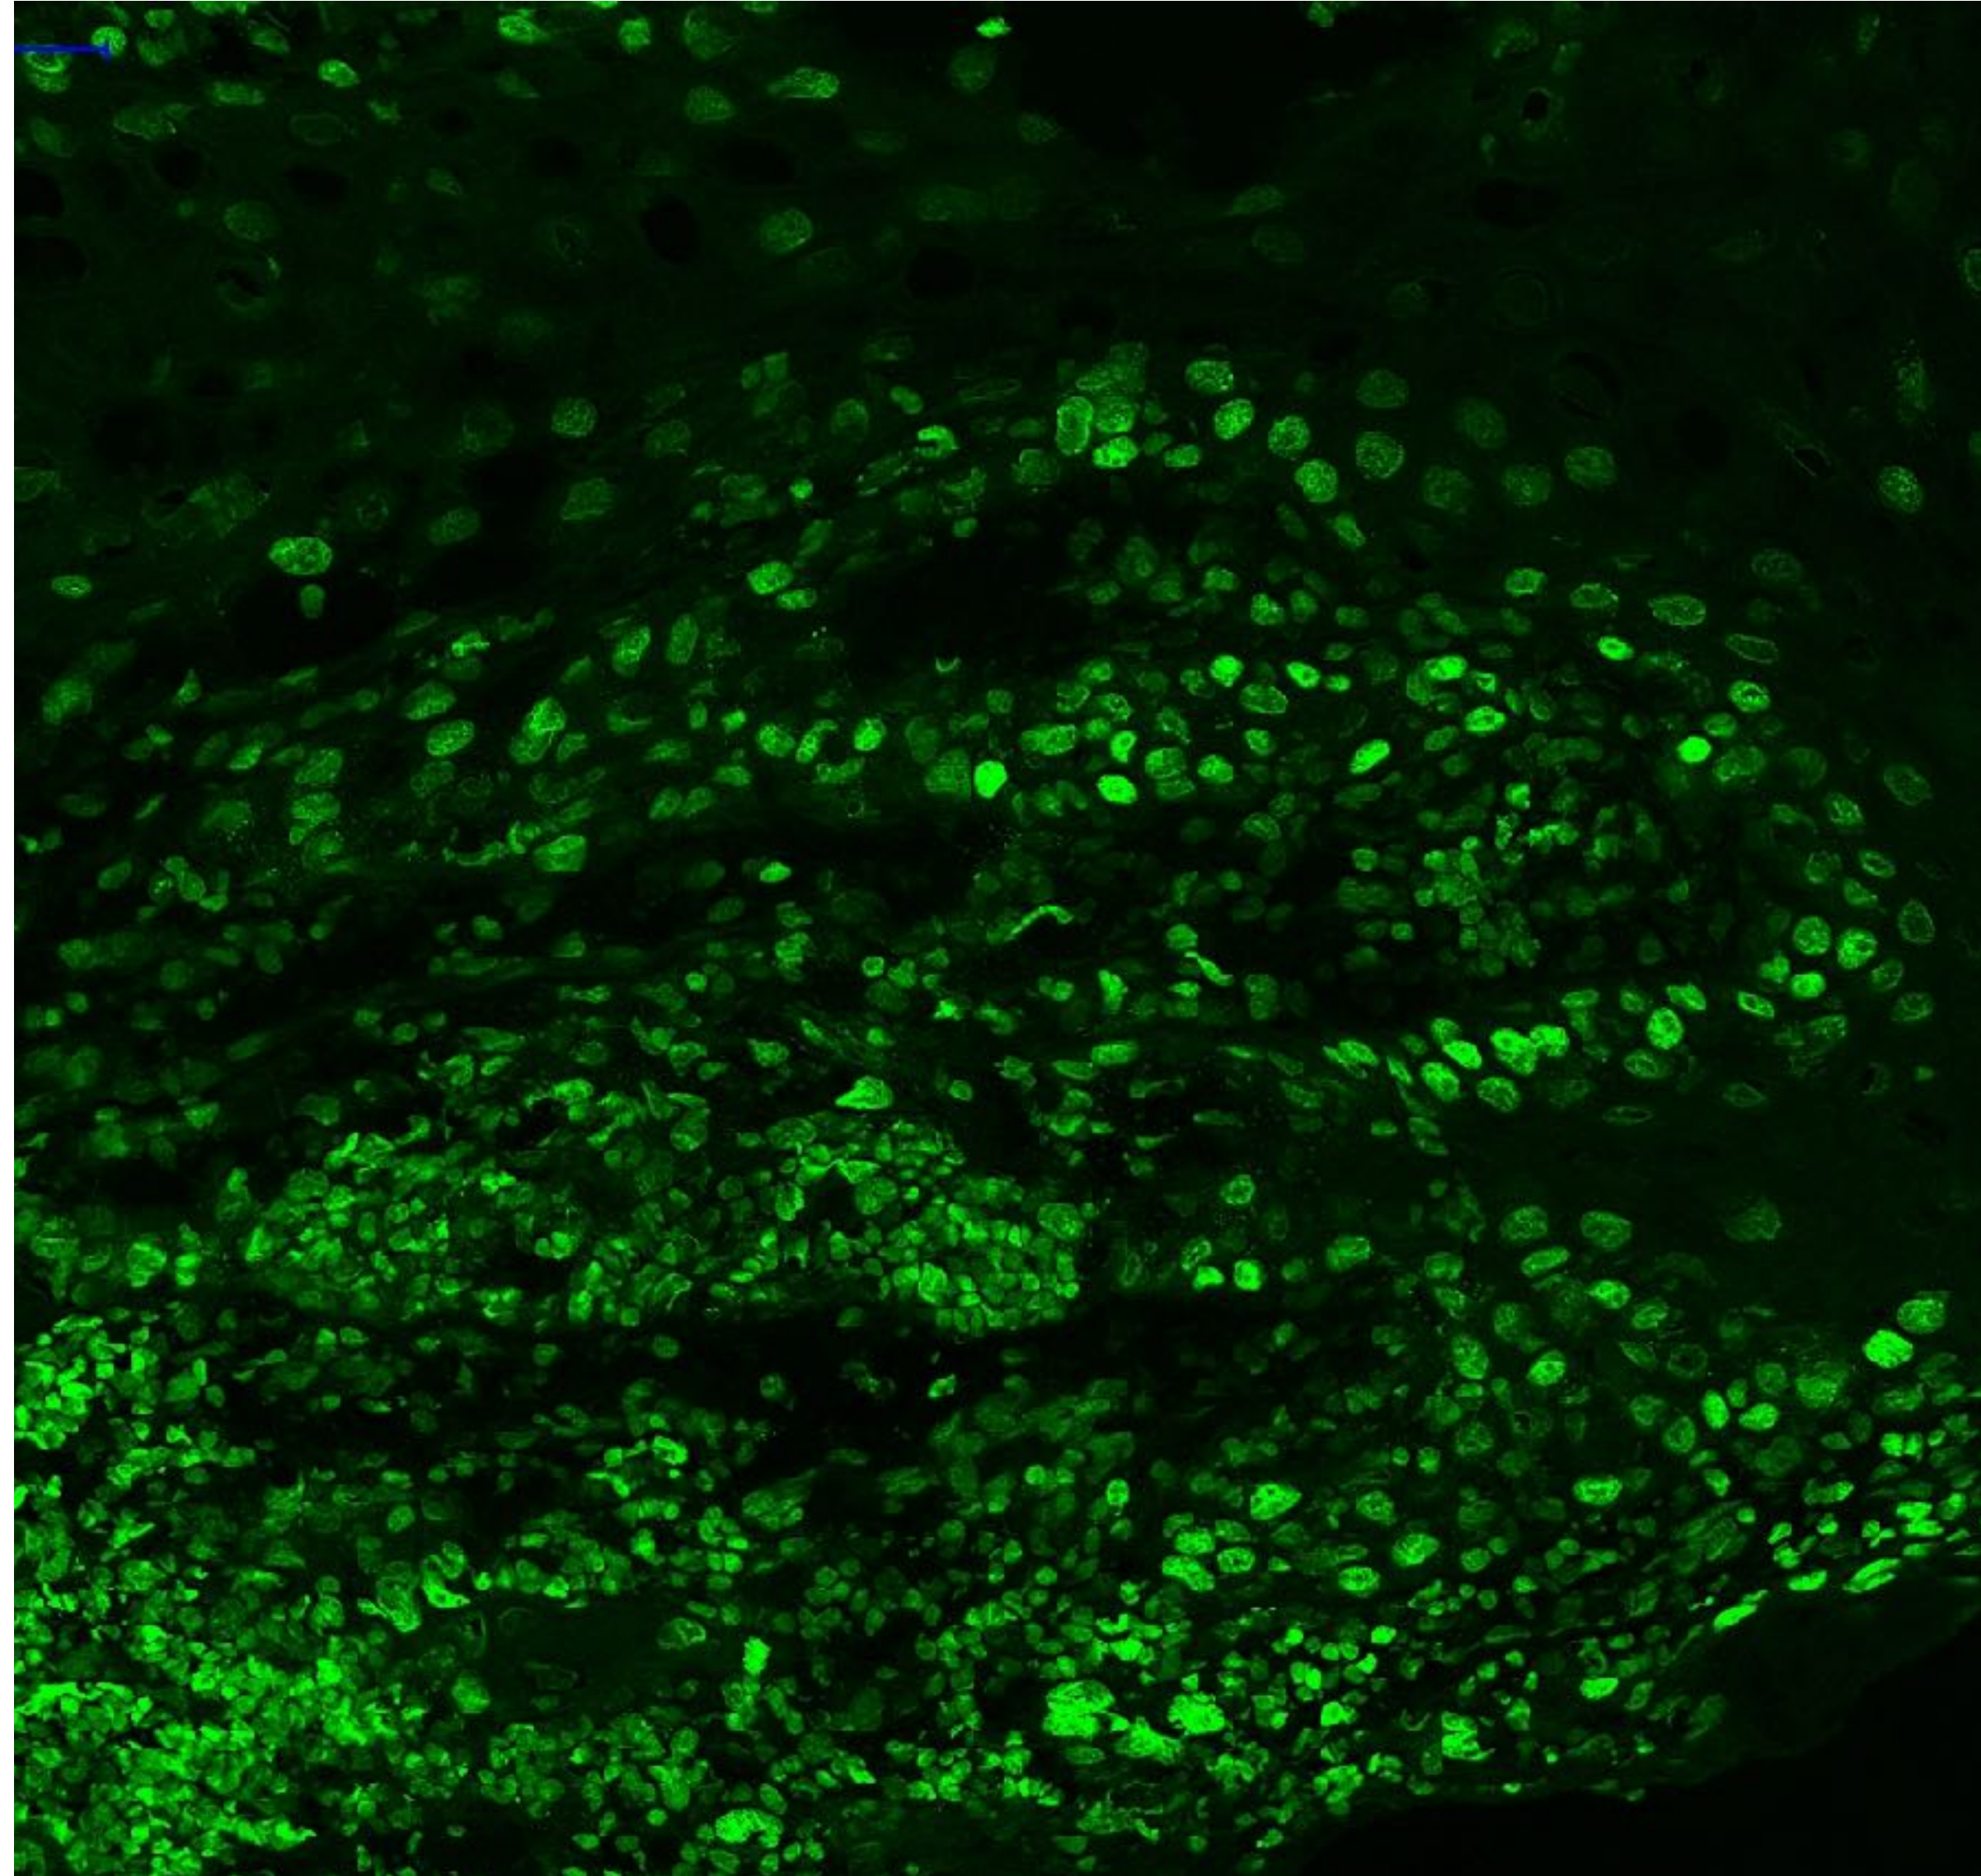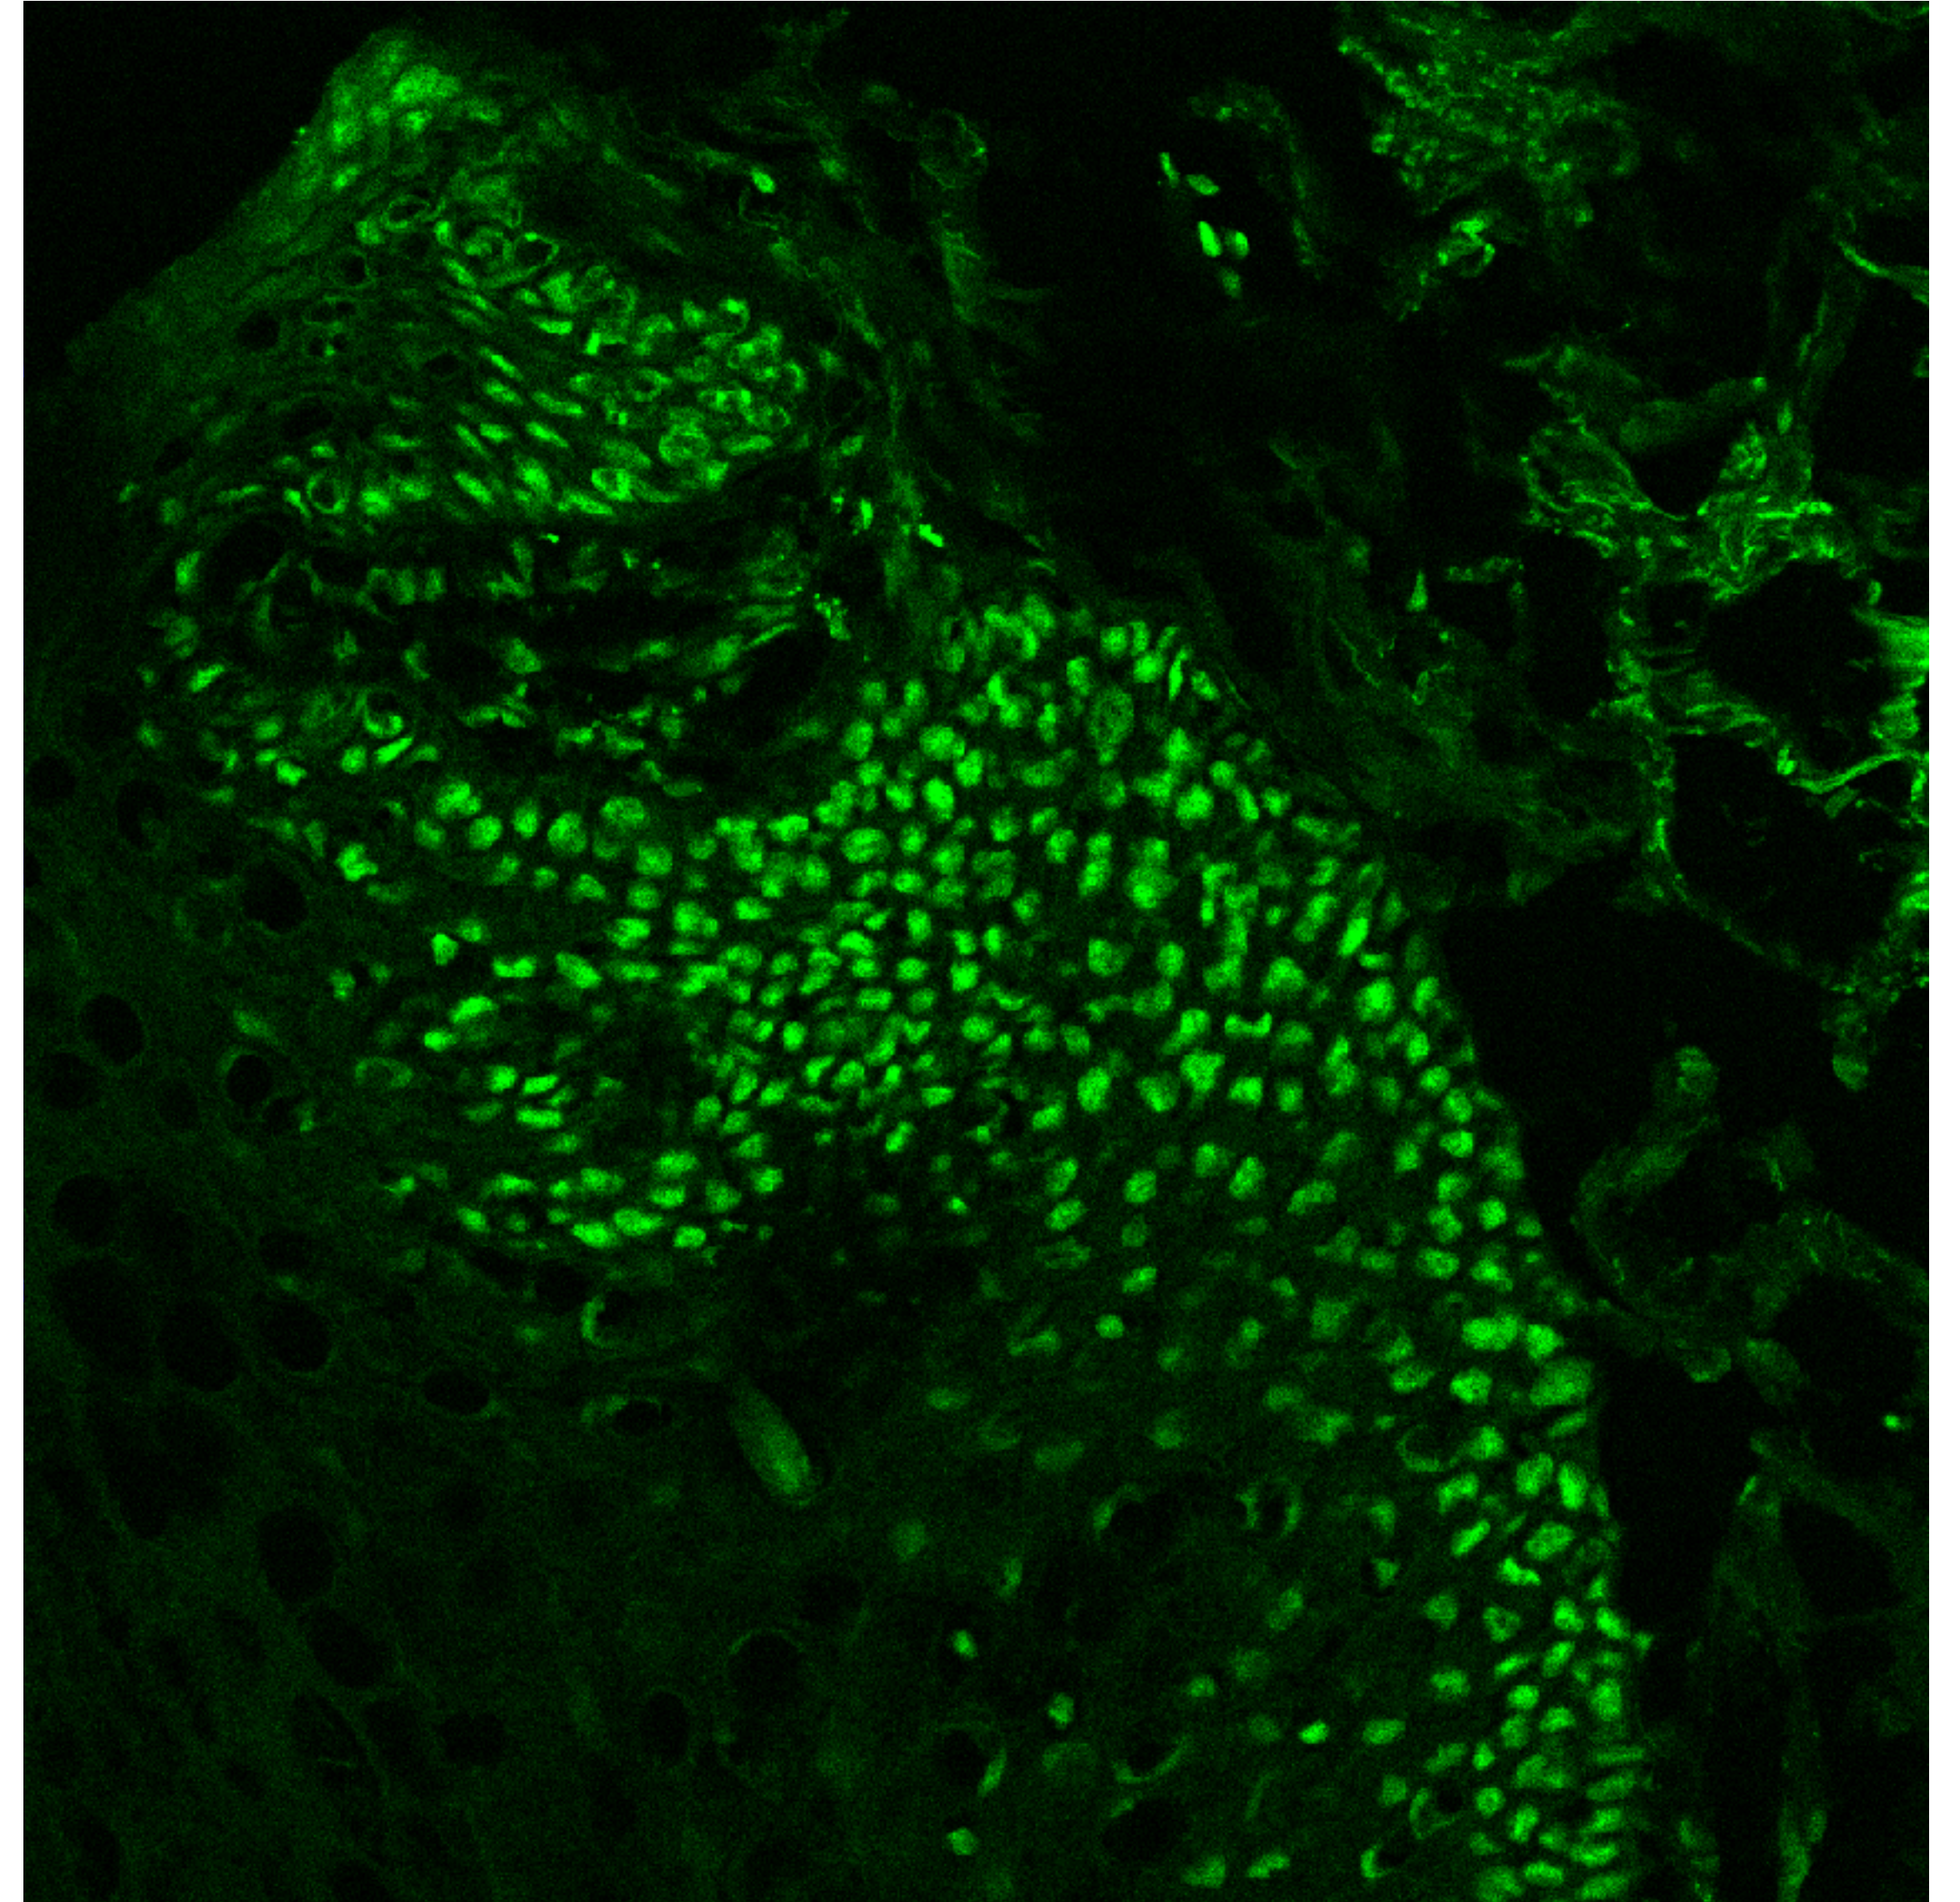

PARPi-FL only (green)



# Margin

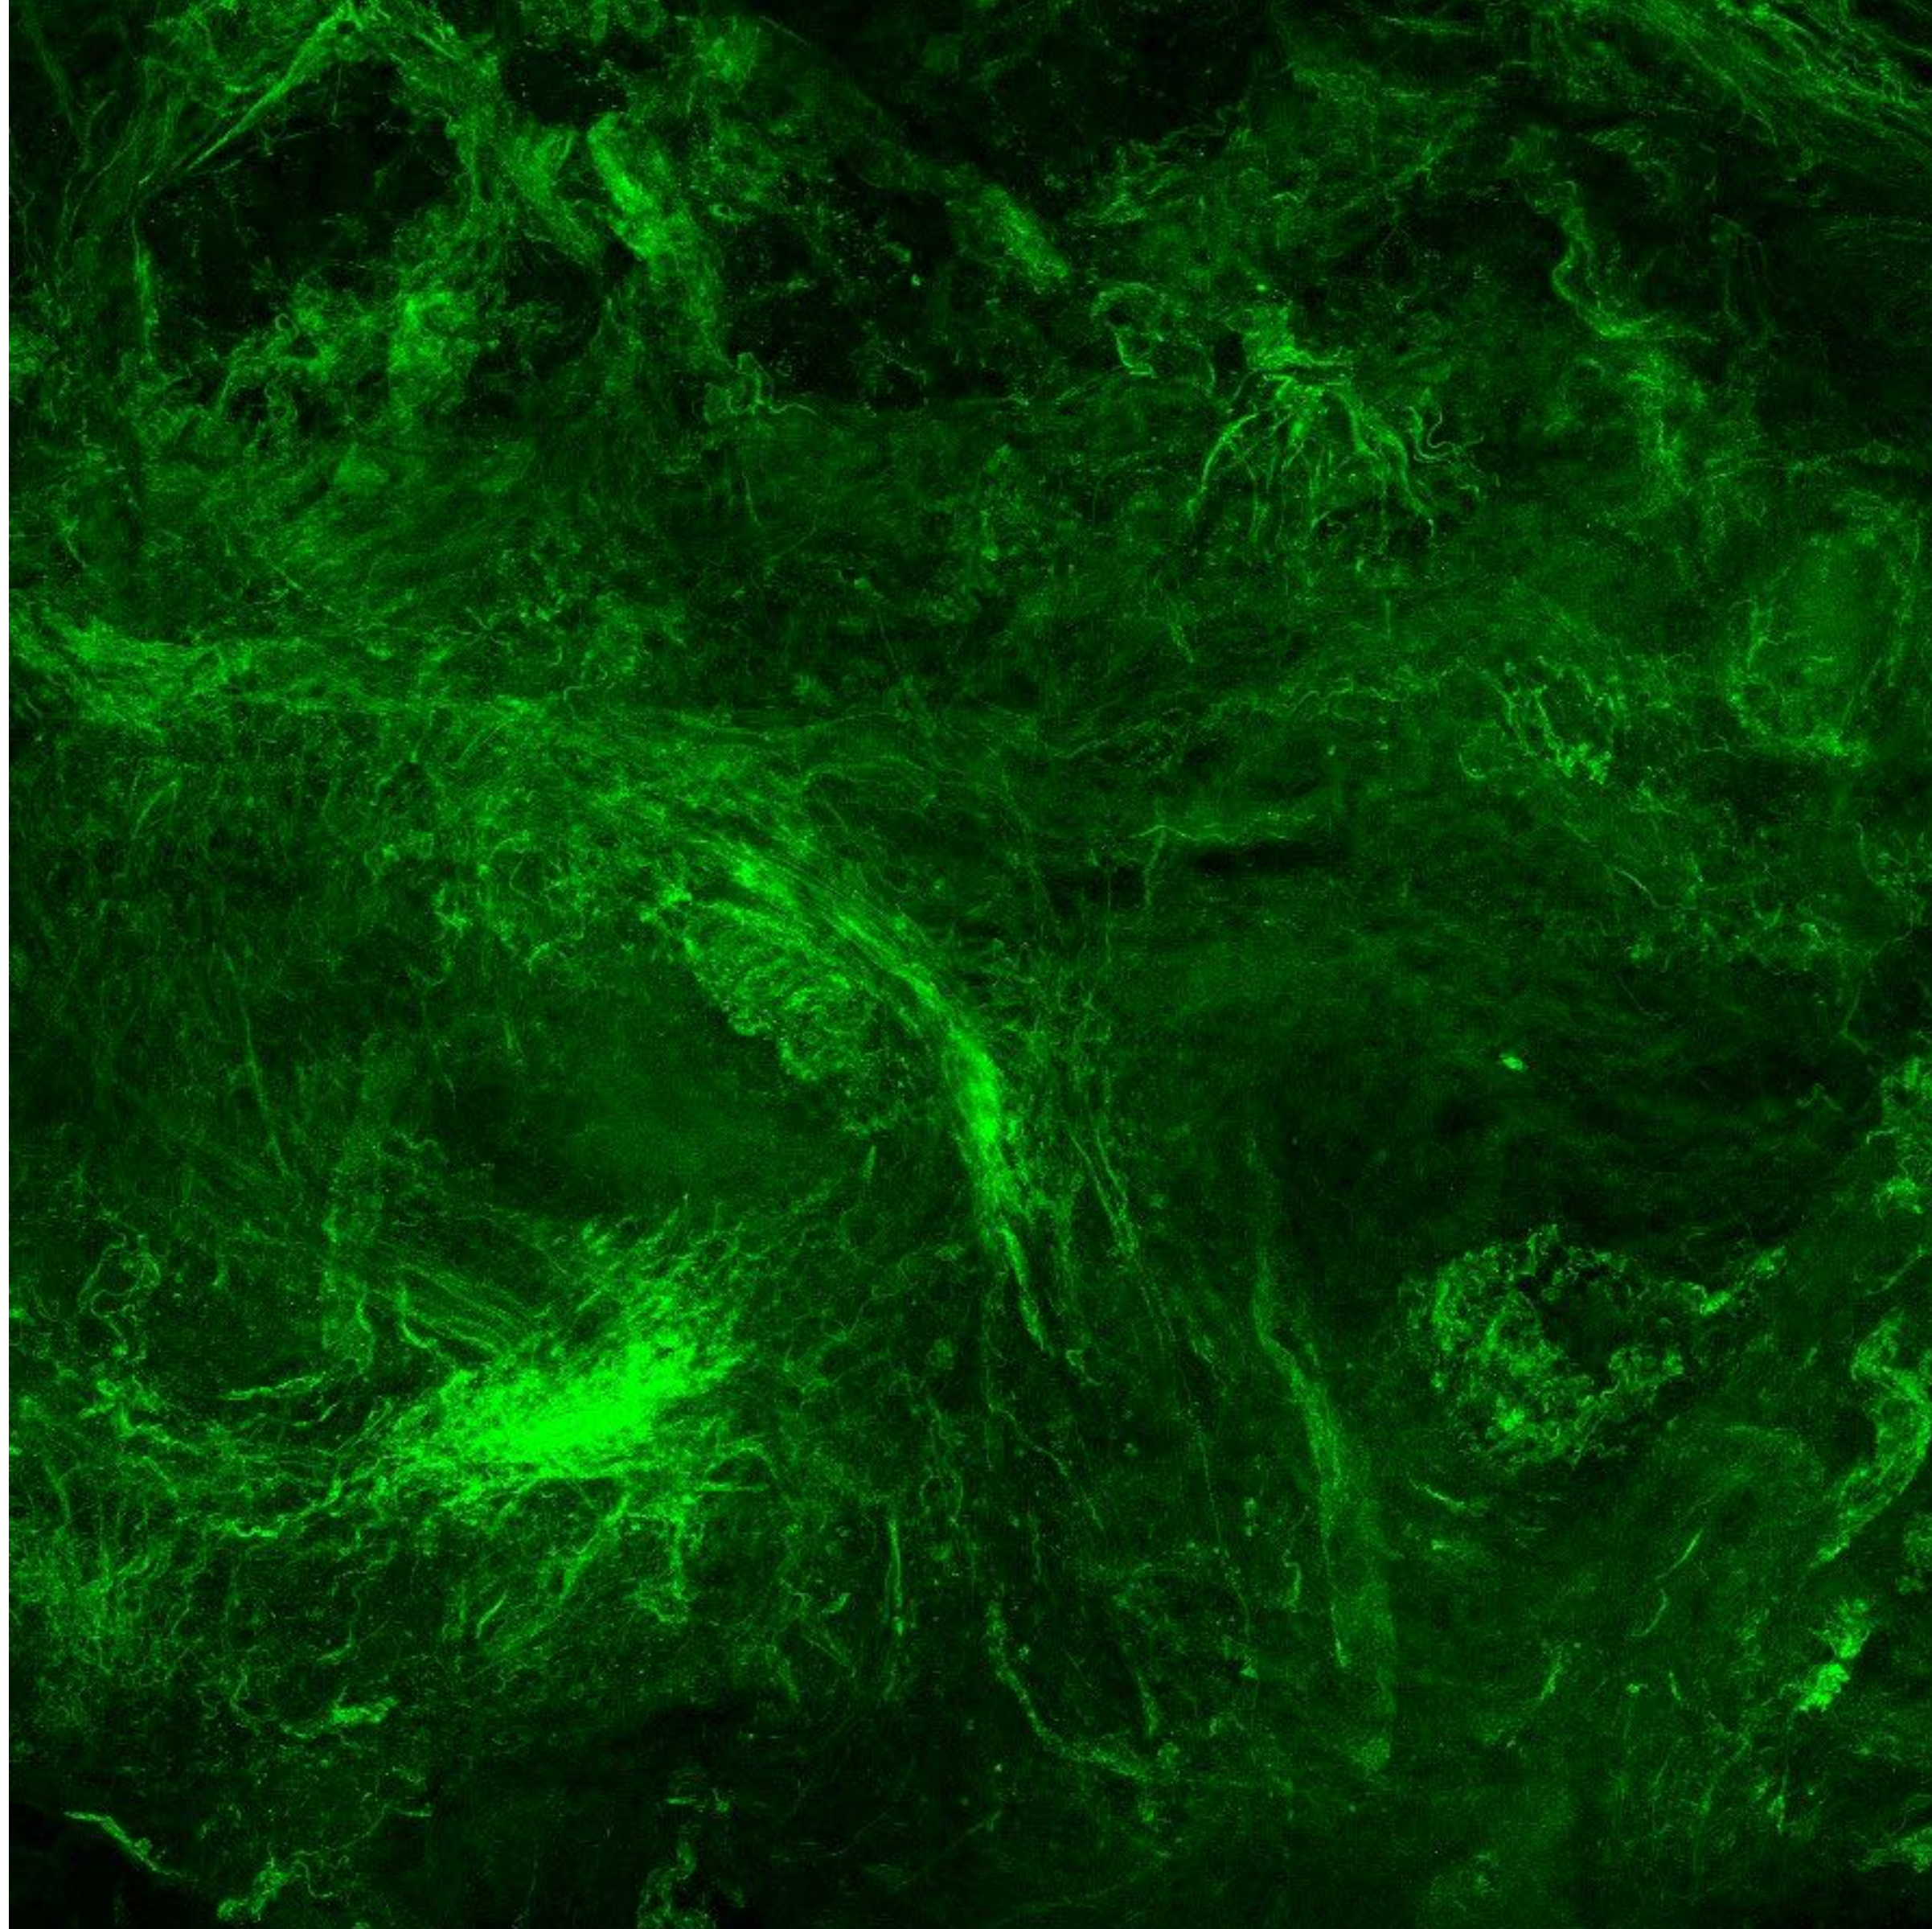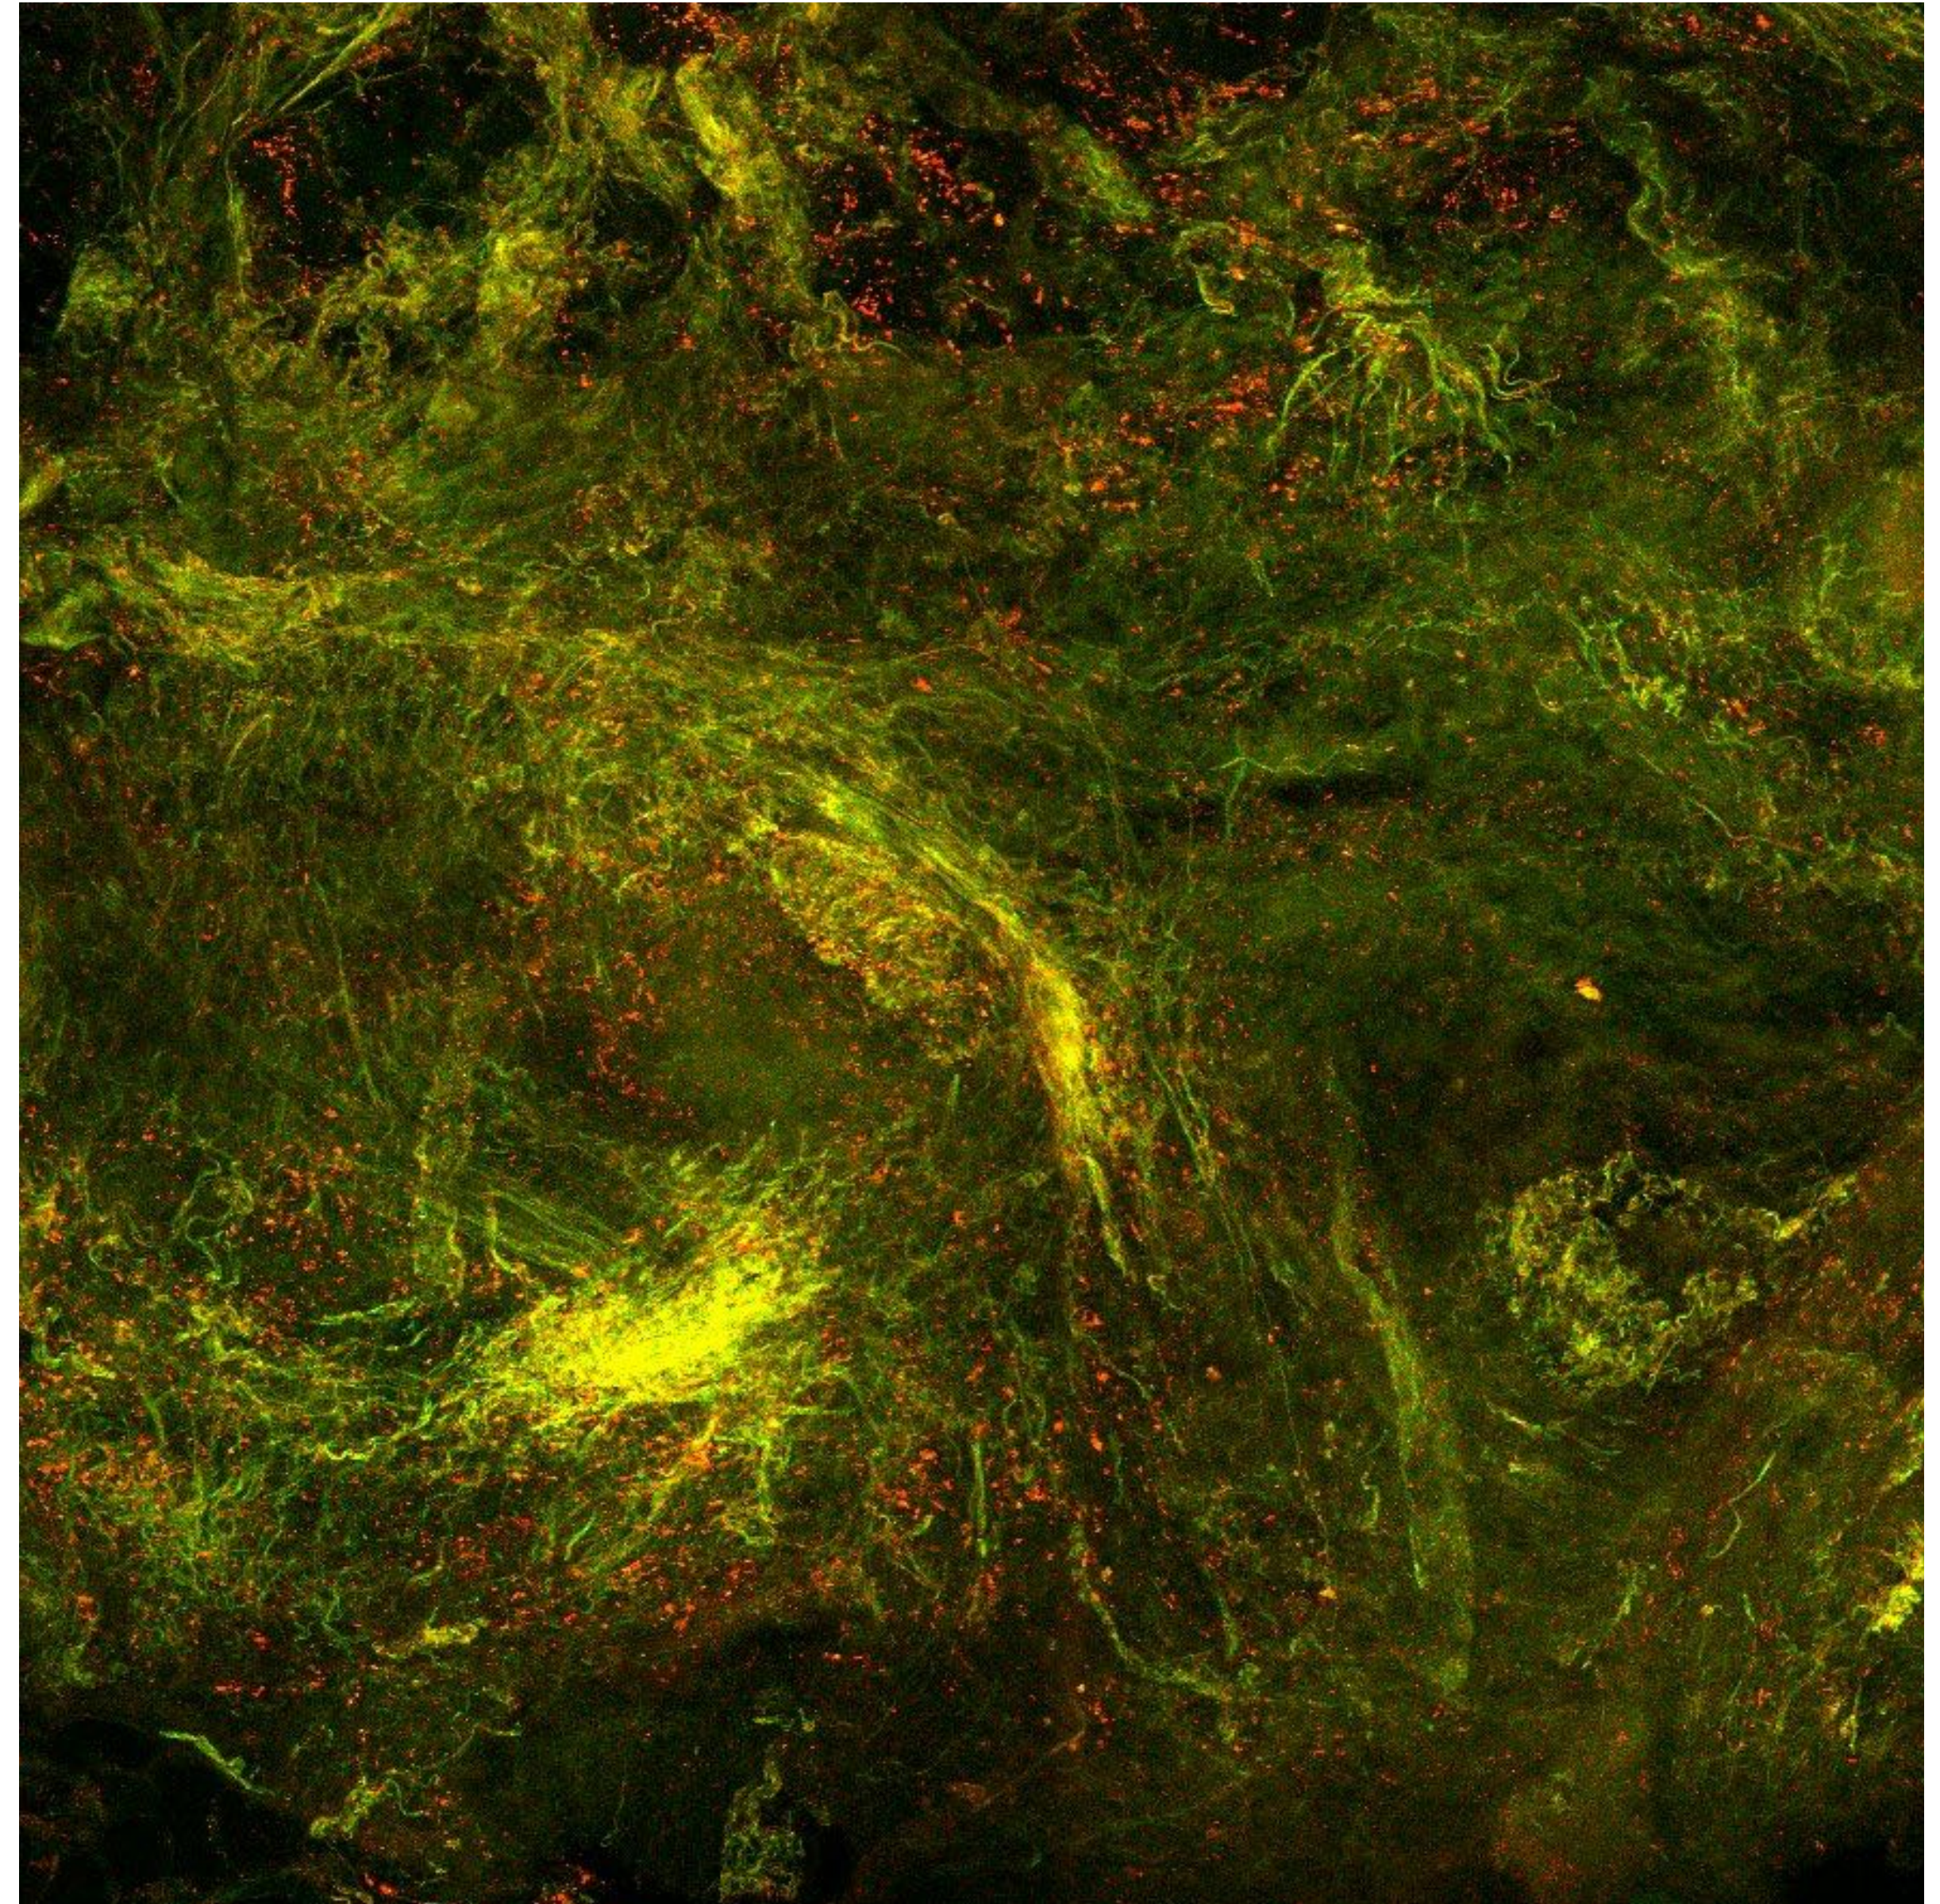



# Margin

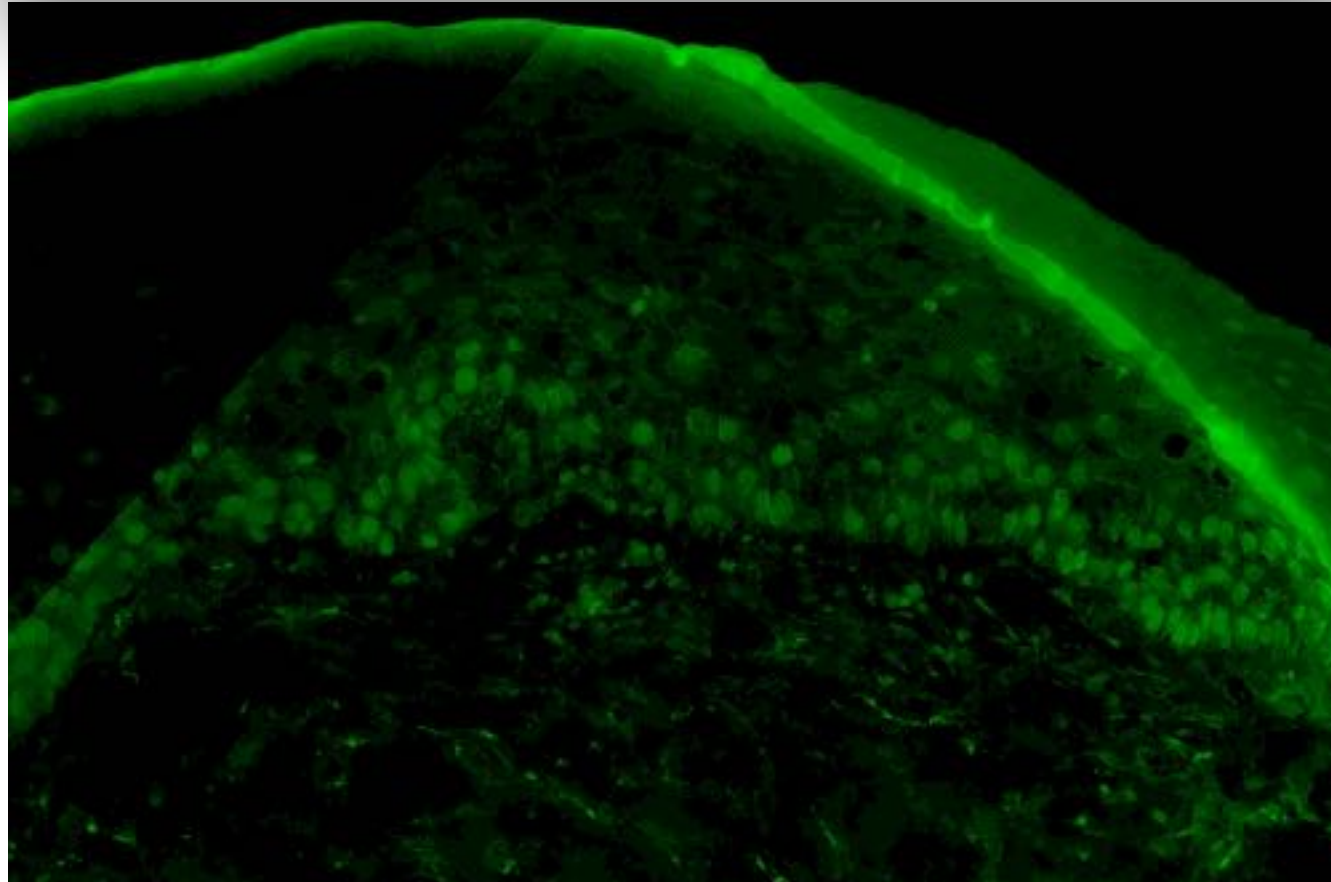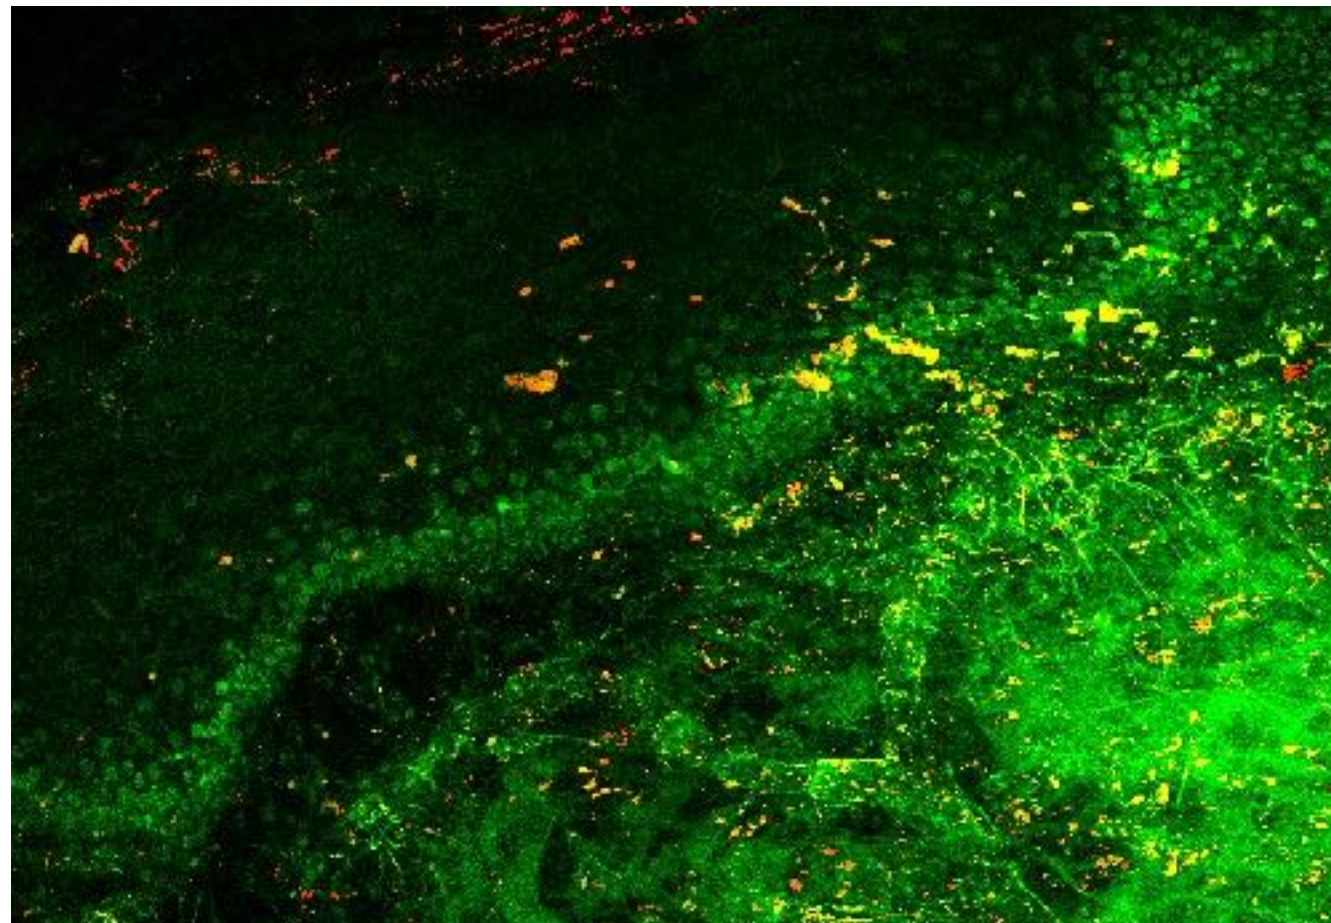

- ▶ PARP-FL related fluorescence confined to thin, regular basal layer (<6 cell layers)
- ▶ PARPi-FL signal in large, round cell nuclei **CAN** be present
- ▶ Autofluorescence **CAN** be present
- ▶ basal layer not always visible

# Tumor

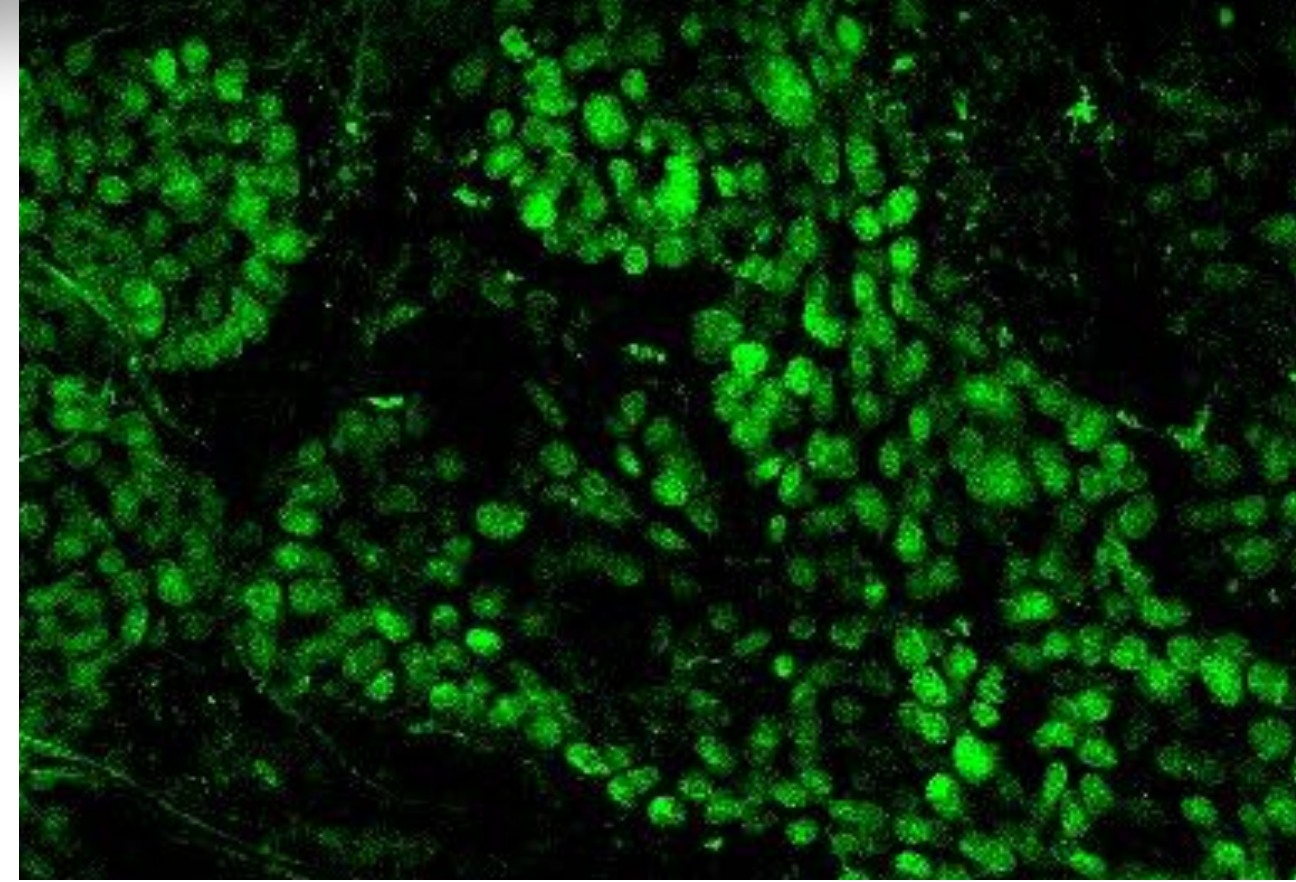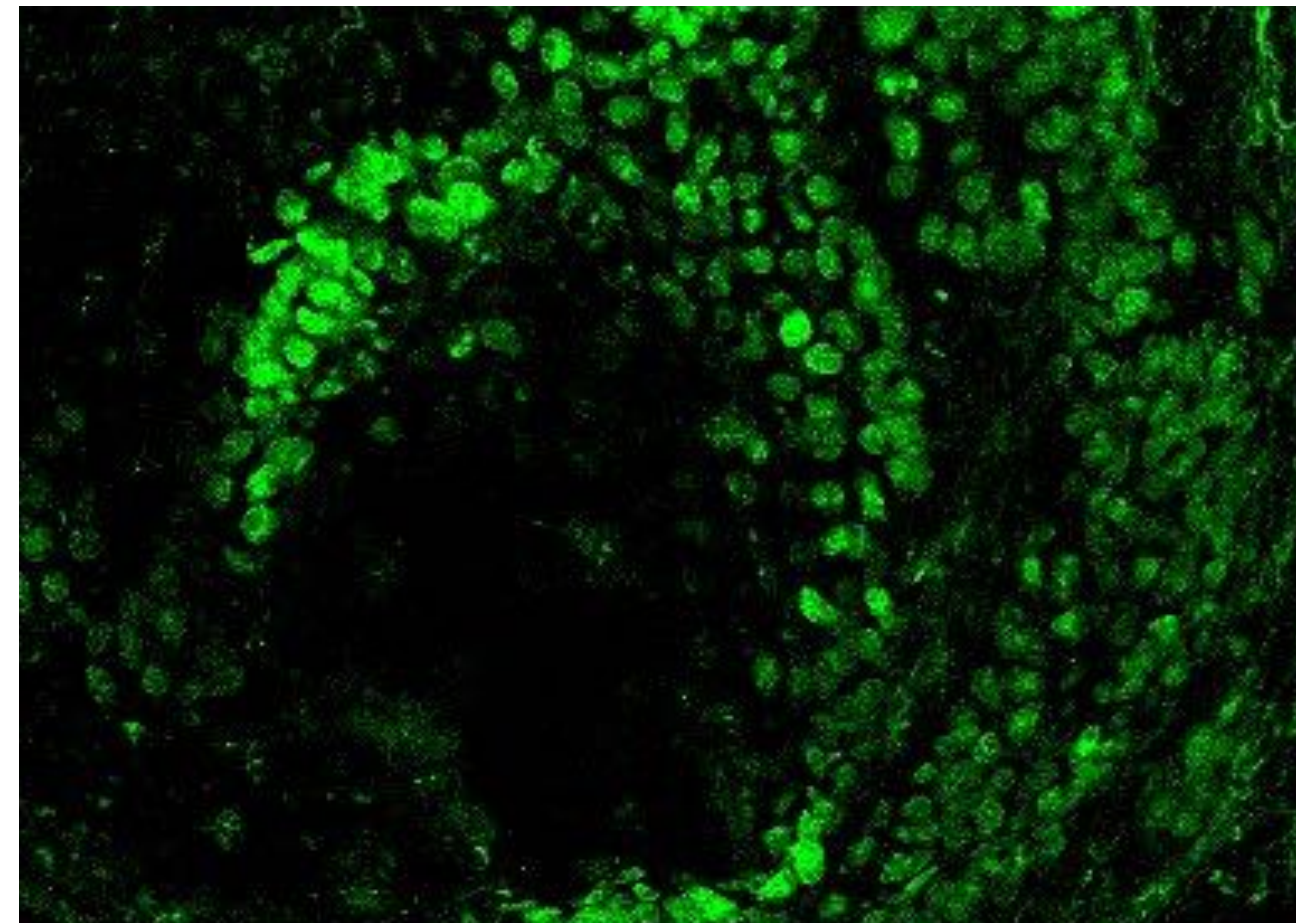

- ▶ PARPi-FL stained large, round cells in structures other than thin, regular basal layer **MUST** be present
- ▶ PARPi-FL signal in large, round cell nuclei
- ▶ AF **CAN** be present (check on overlay image)

## How to decide

Round, green cells present in any of the images?

No

Margin

Yes

Are they confined to a thin basal layer (regular or with arches/crypts)?

Yes

Margin

No

Tumor
