# Supplementary material for: PARP1 as a biomarker for early detection and intraoperative tumor delineation in epithelial cancers – first-in-human results
Source: bioRxiv or medRxiv preprint supplement (doi:10.1101/663385), 2019-06-14
Supplement: Supplementary file [file media-3.pdf]

# **PARPi-FL staining of fresh biopsy tissues for identification of tumor and margin tissue**

Blinded study

Data set



1472

# Overview

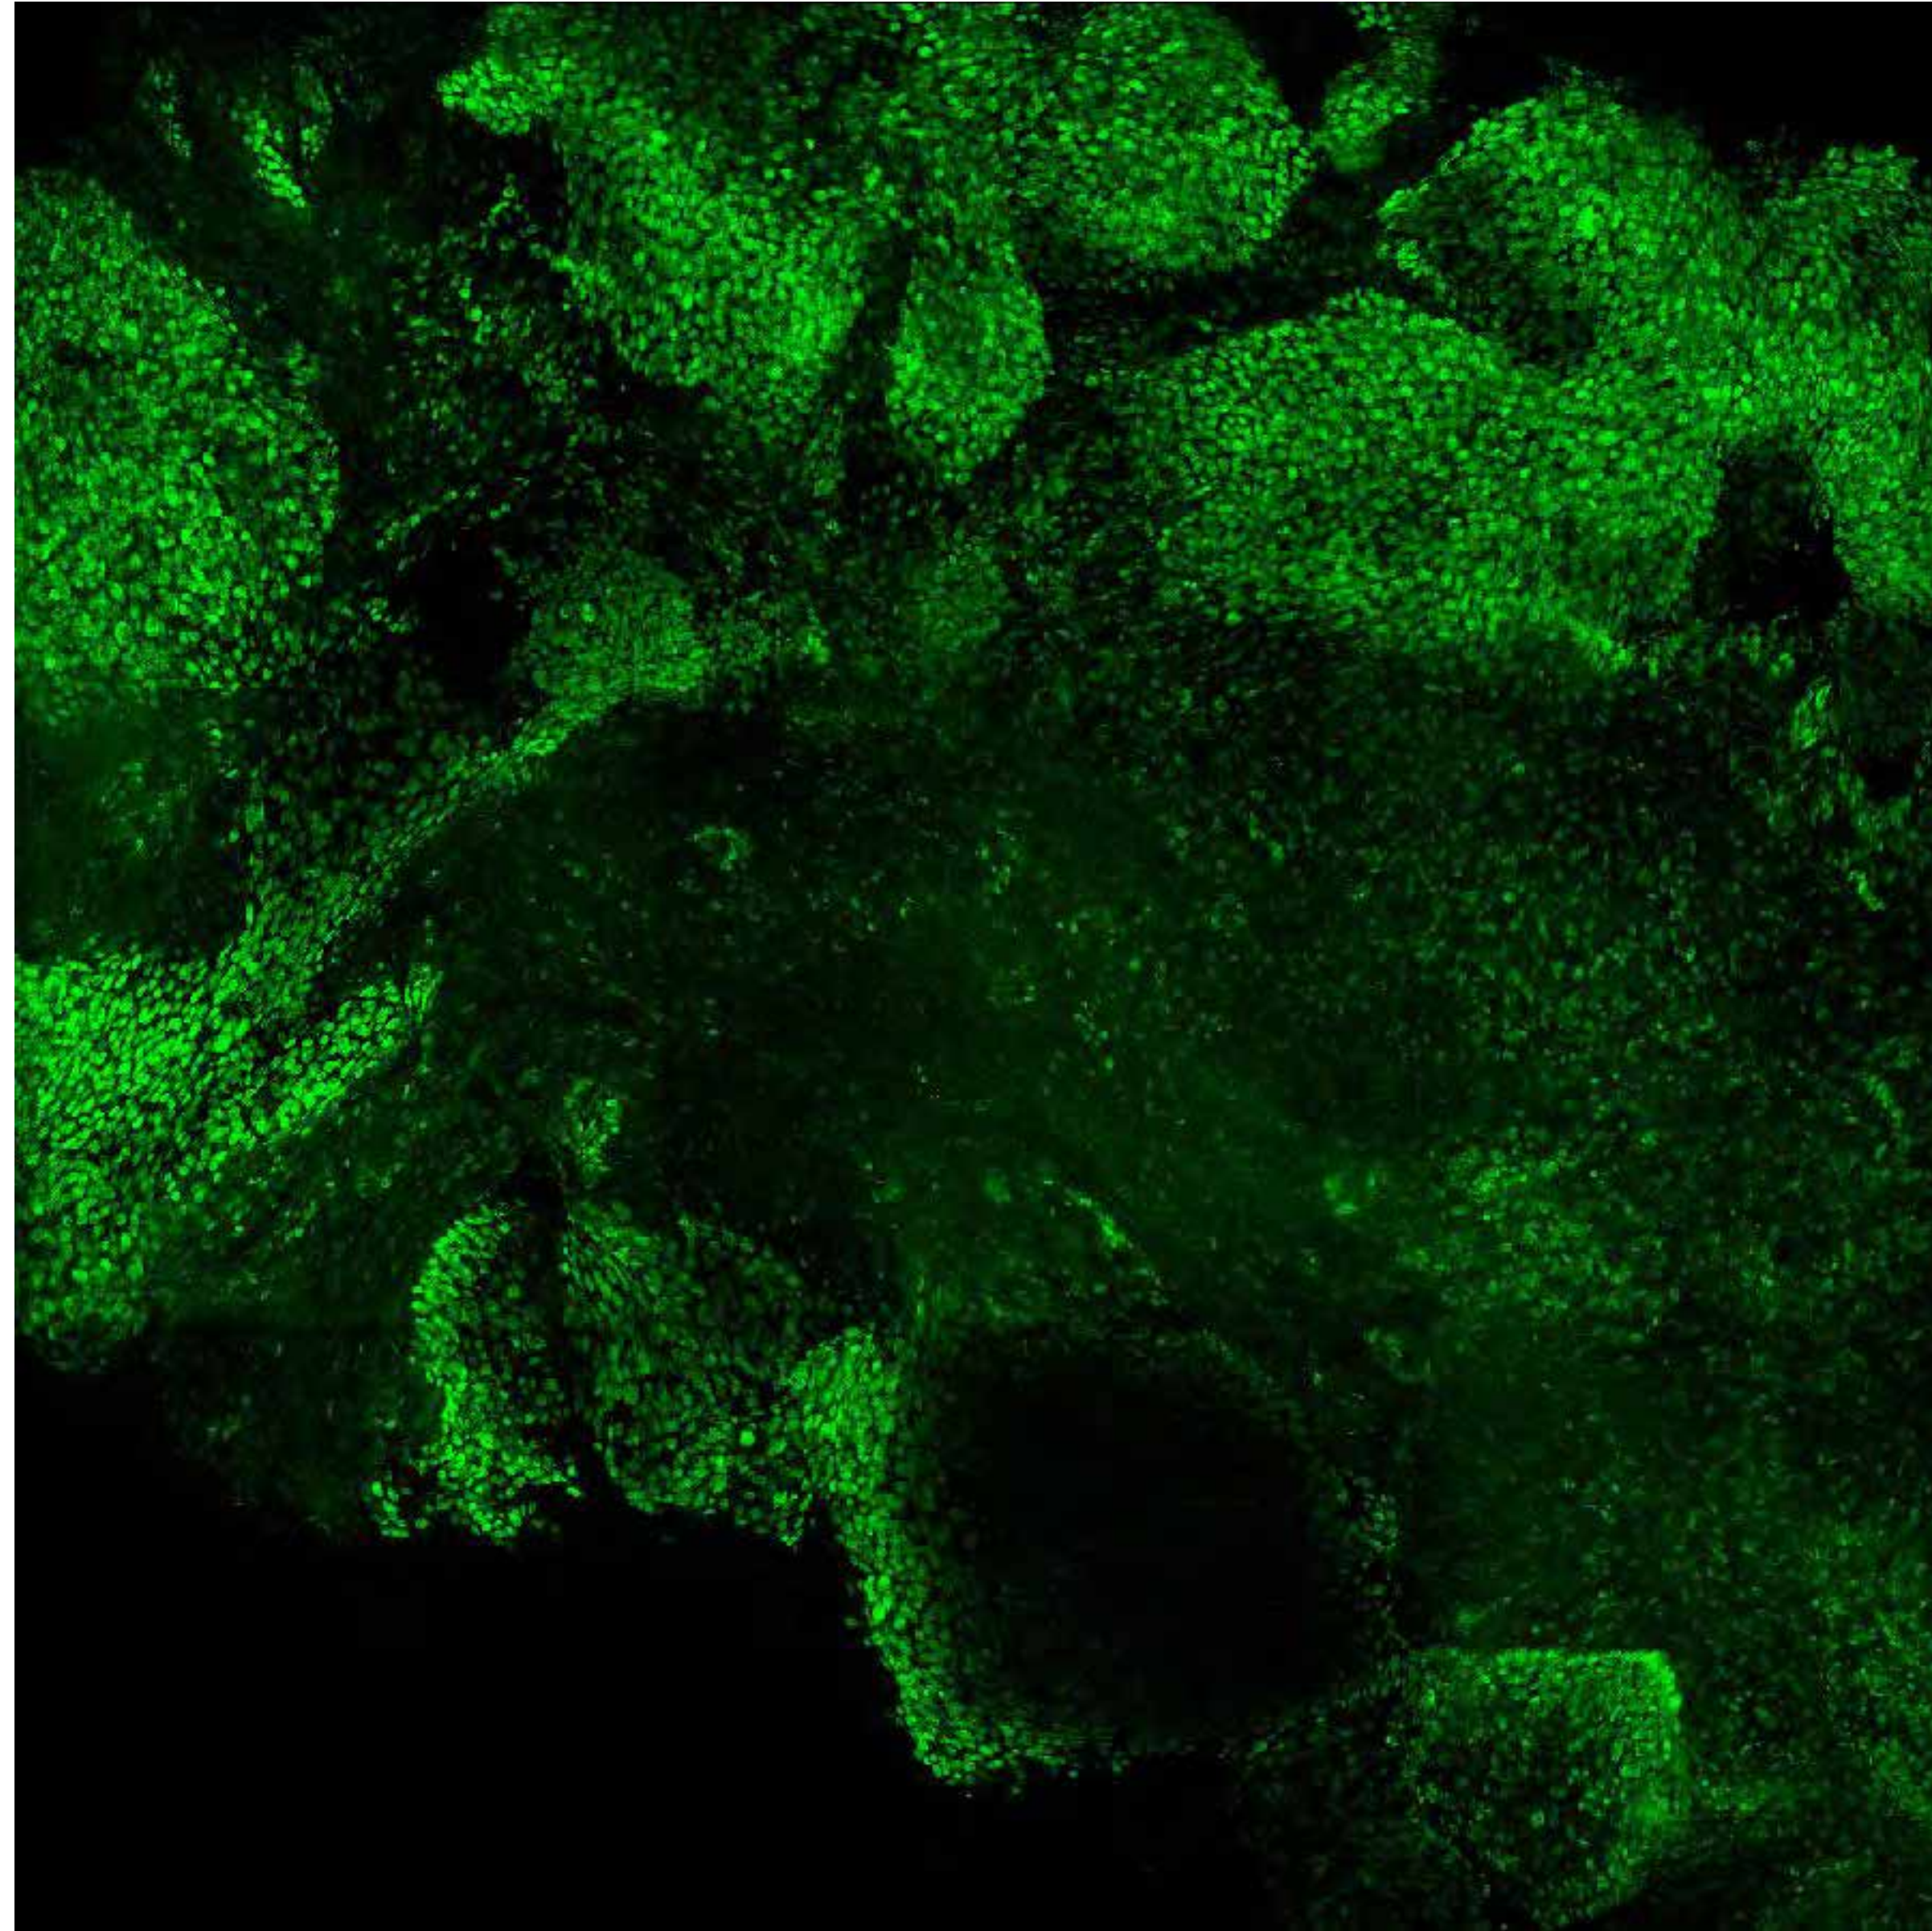

PARPi-FL only (green)

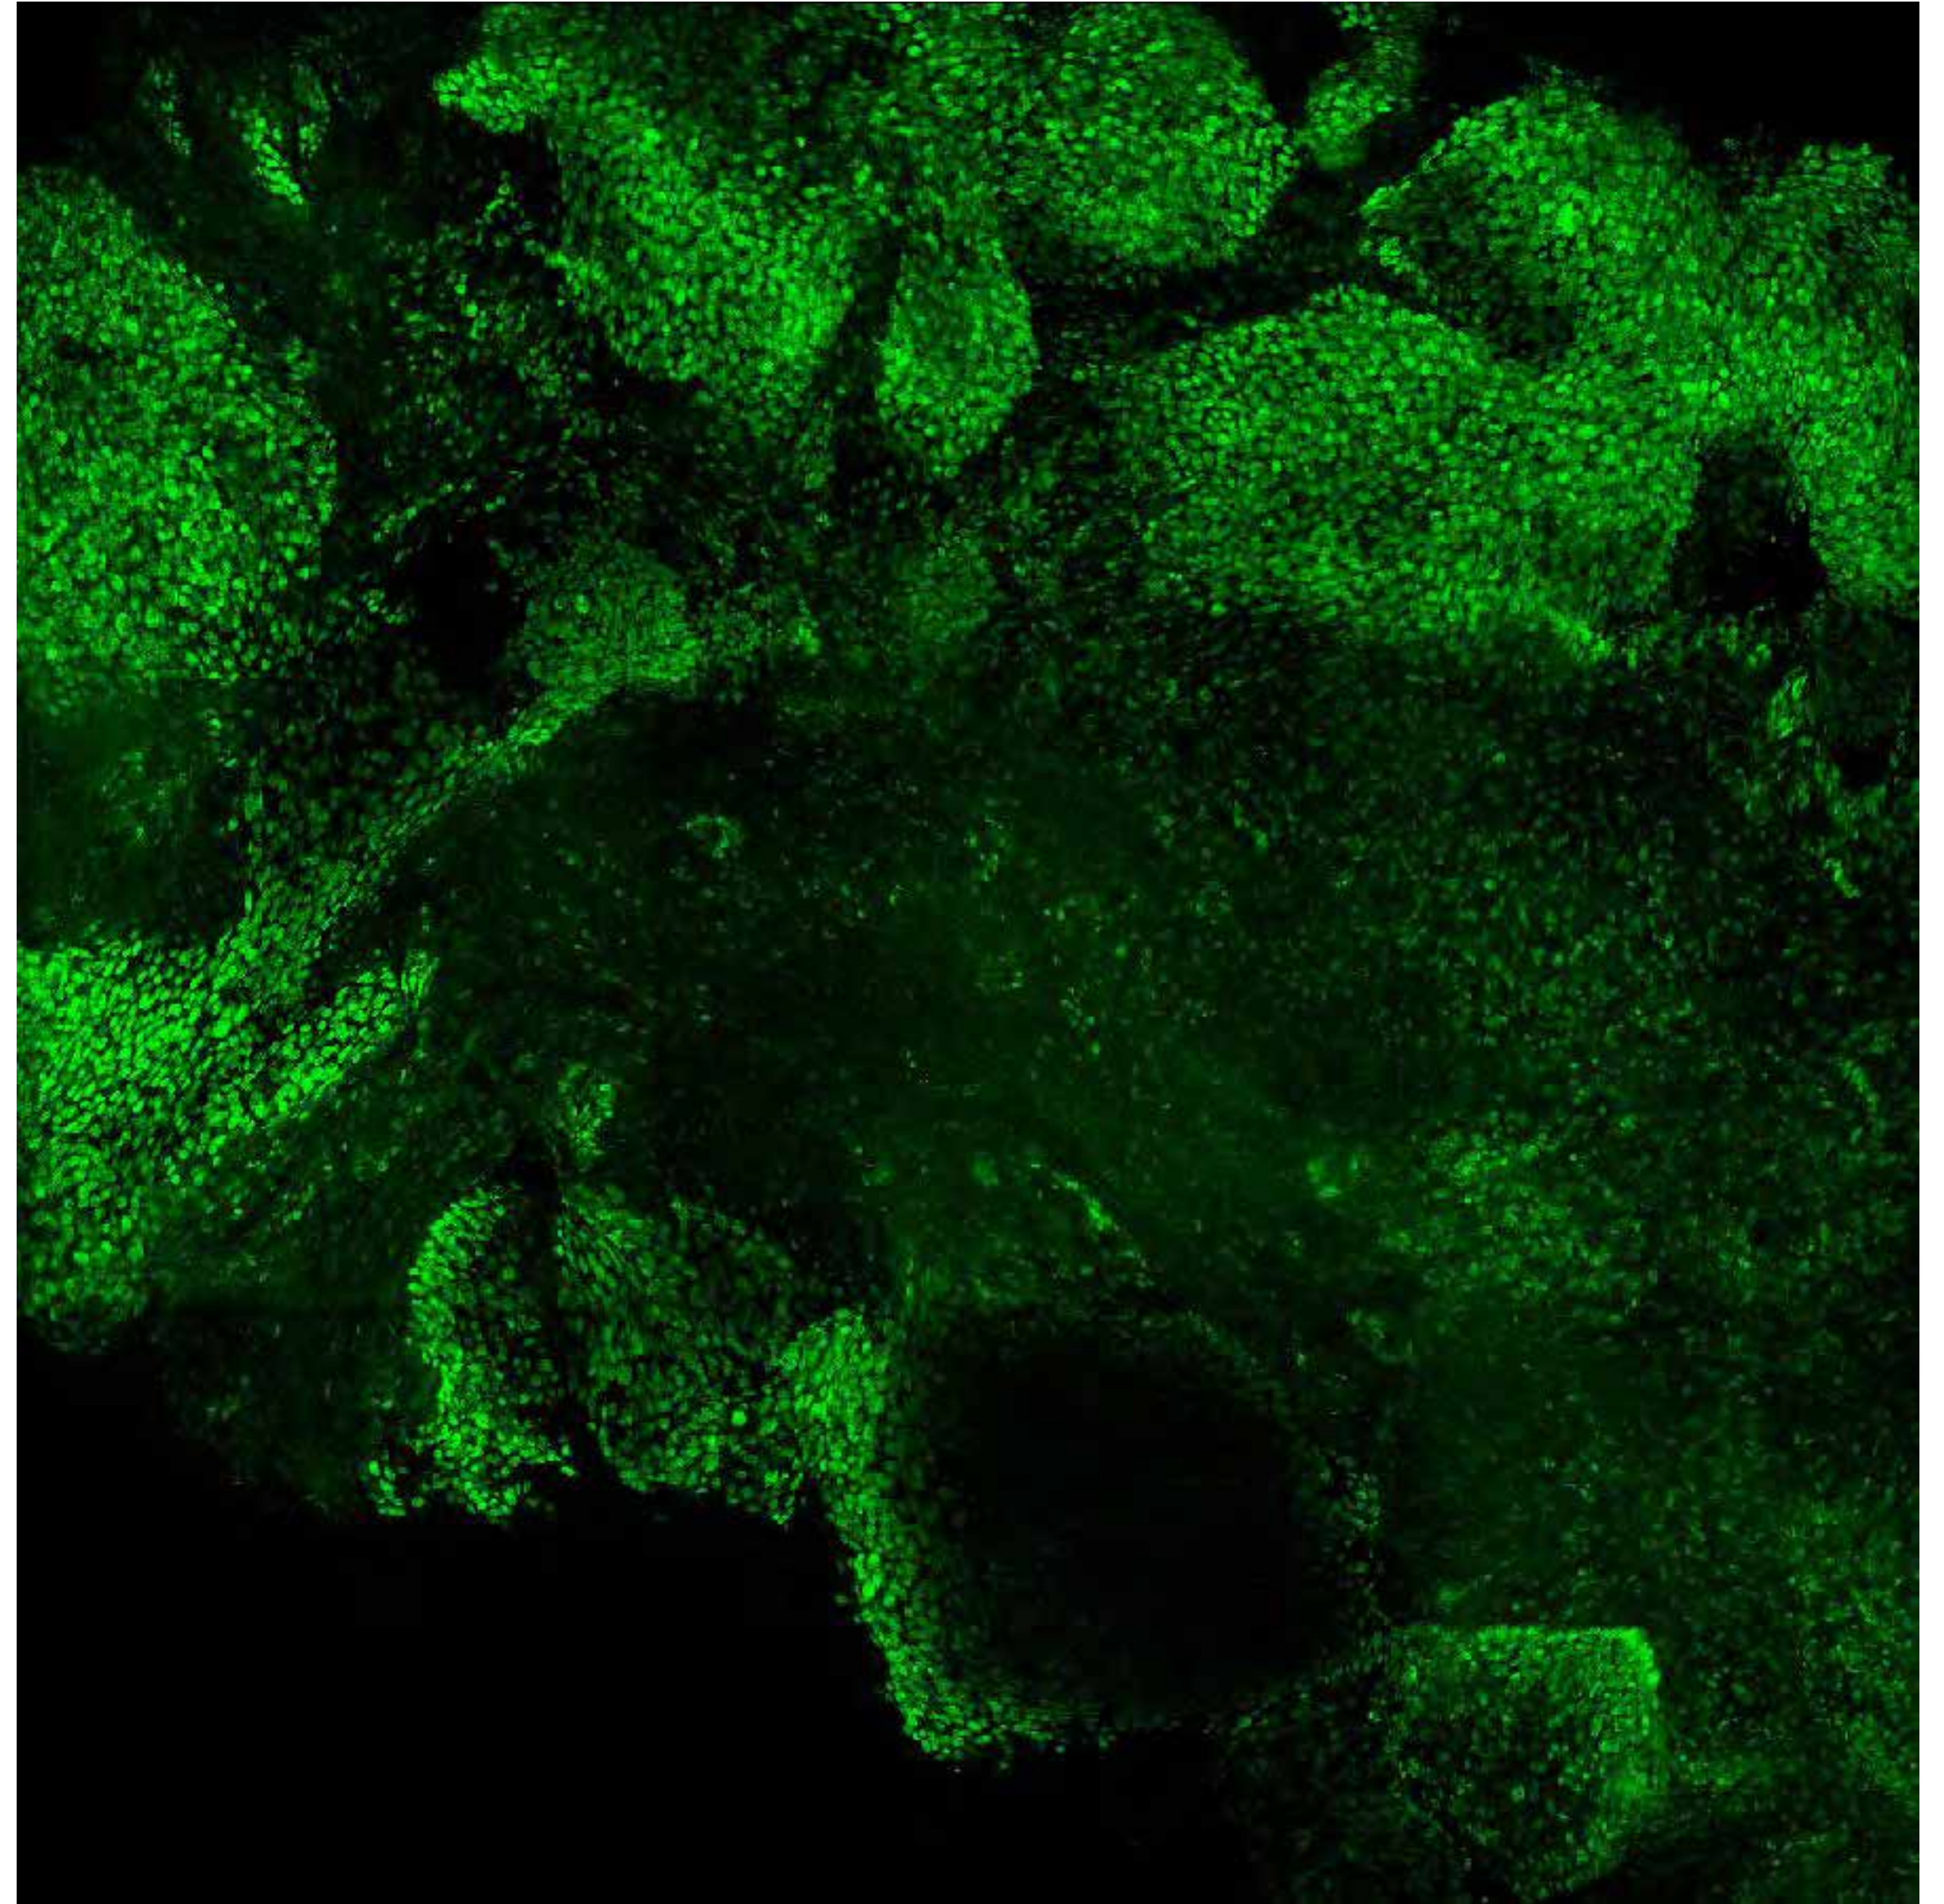

PARPi-FL (green) + Autofluorescence (red/yellow)



1472

Close-up

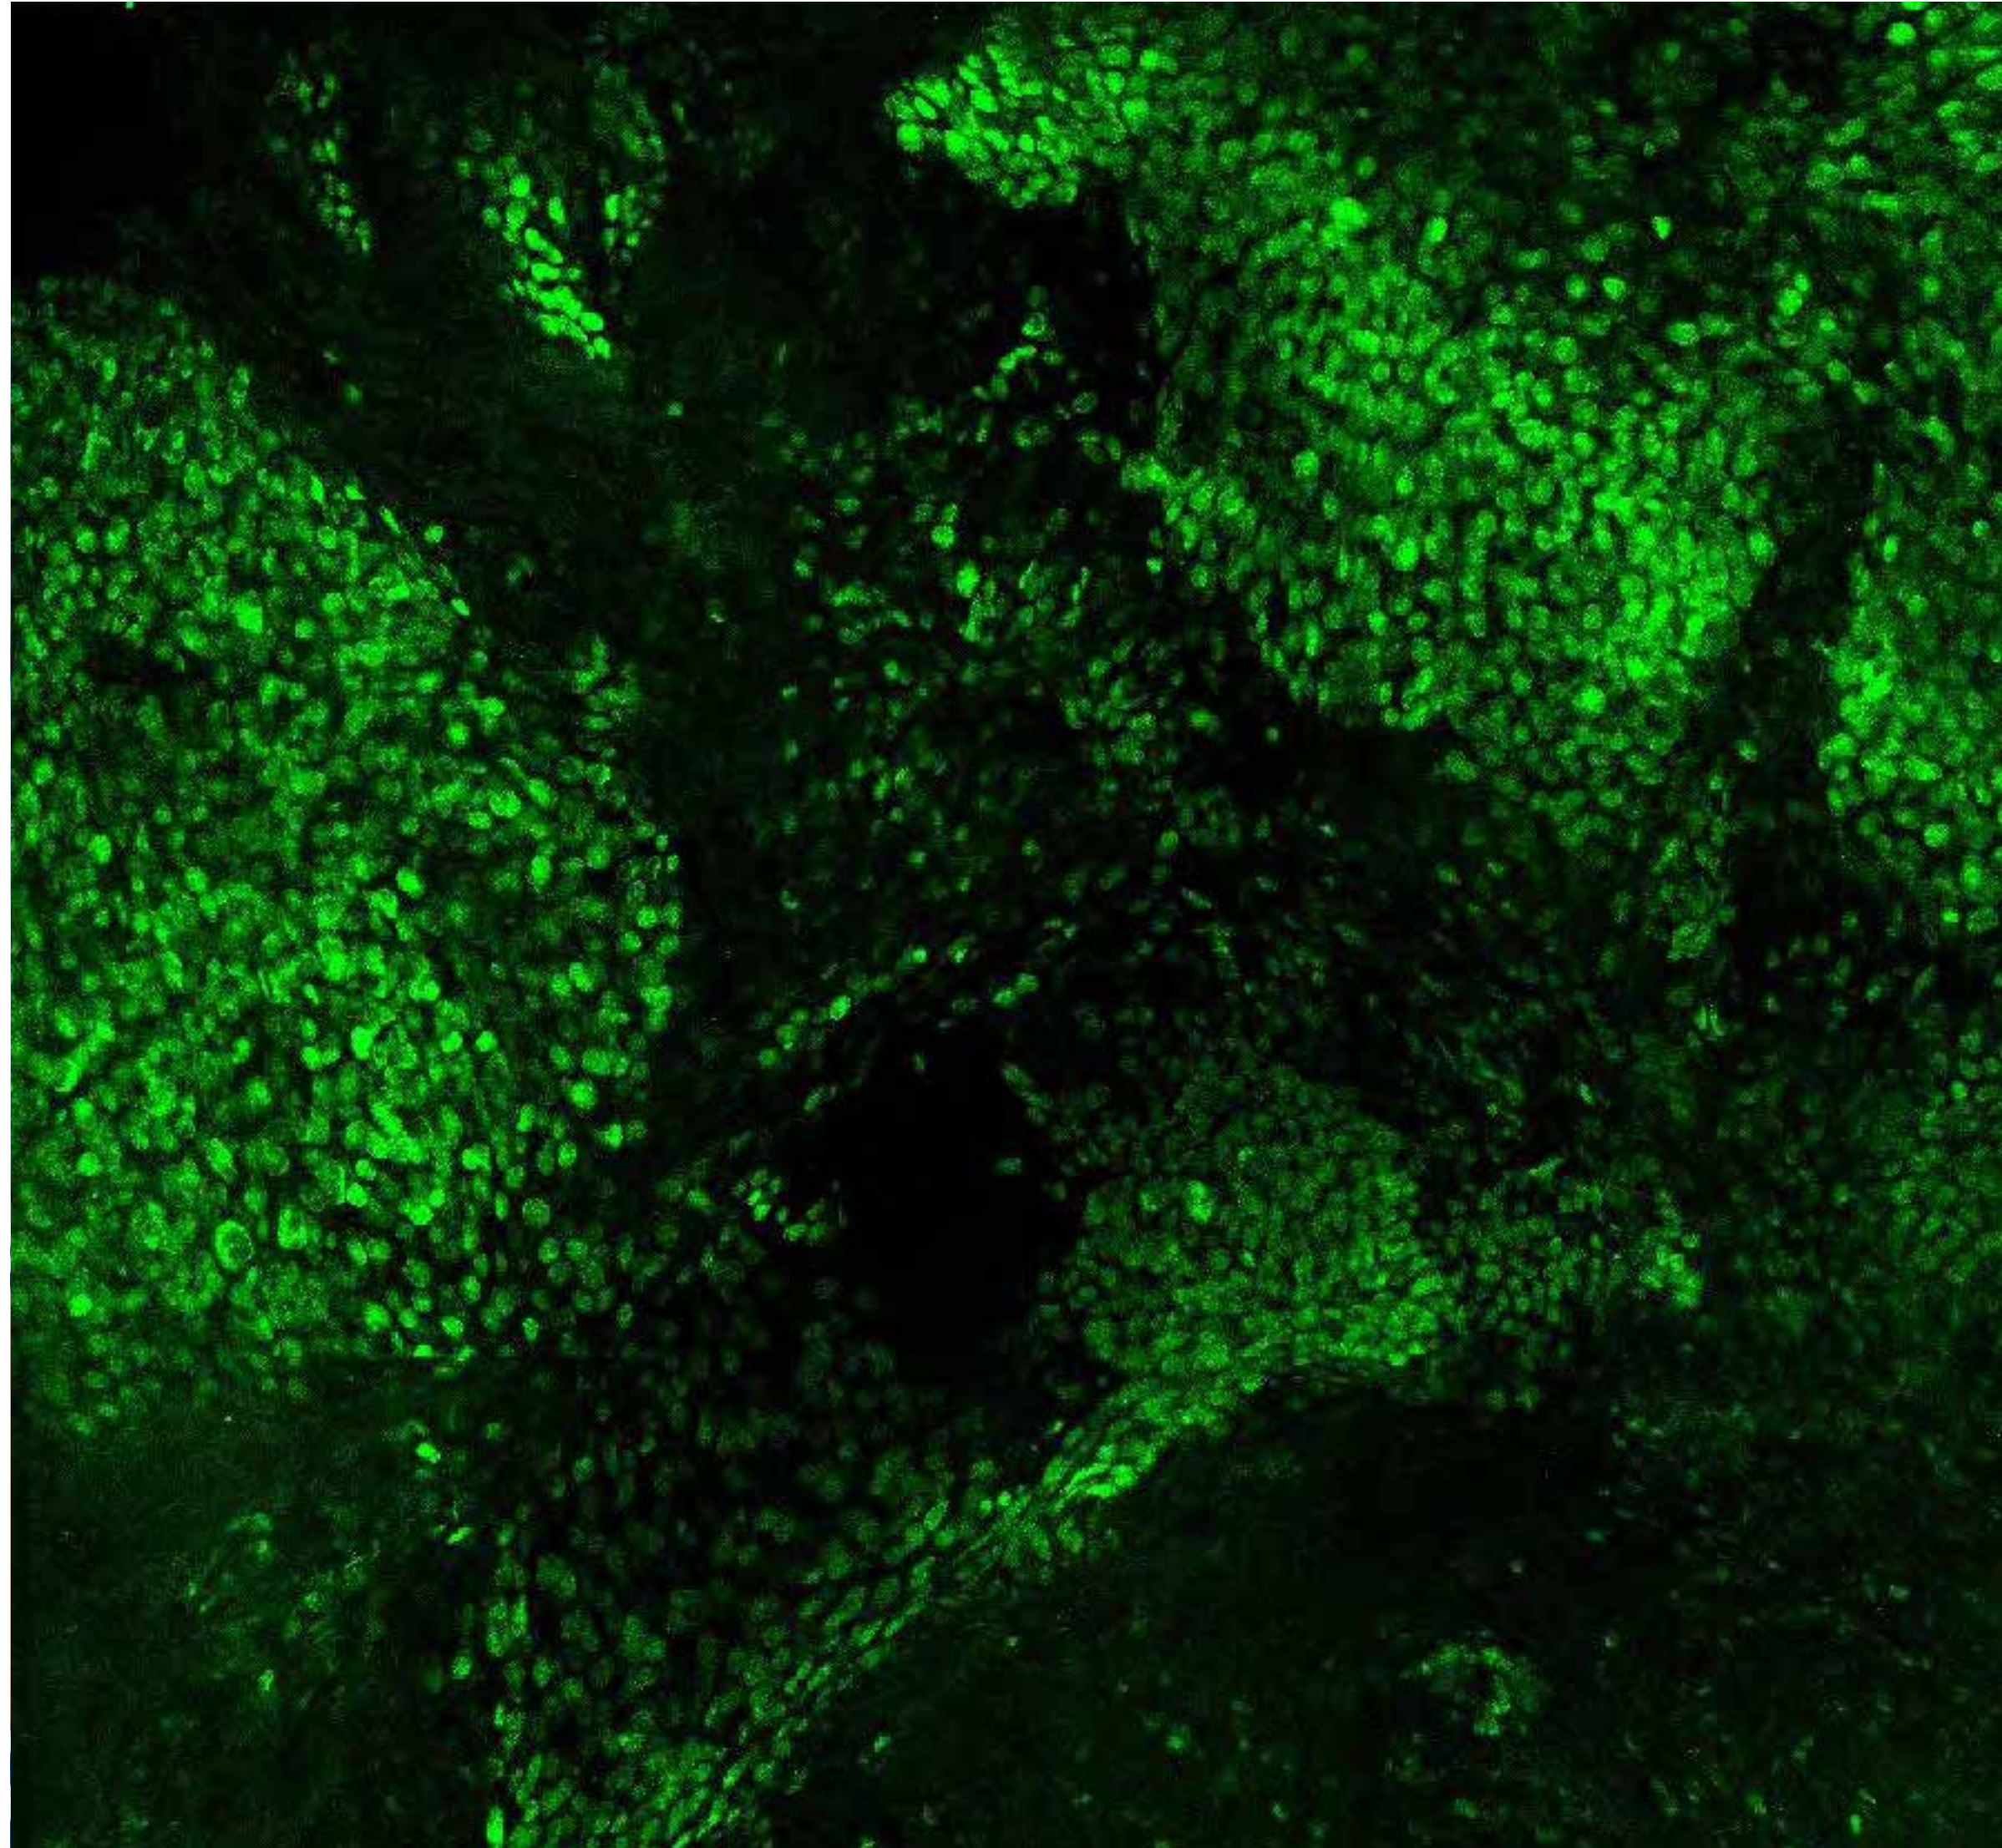

PARPi-FL only (green)

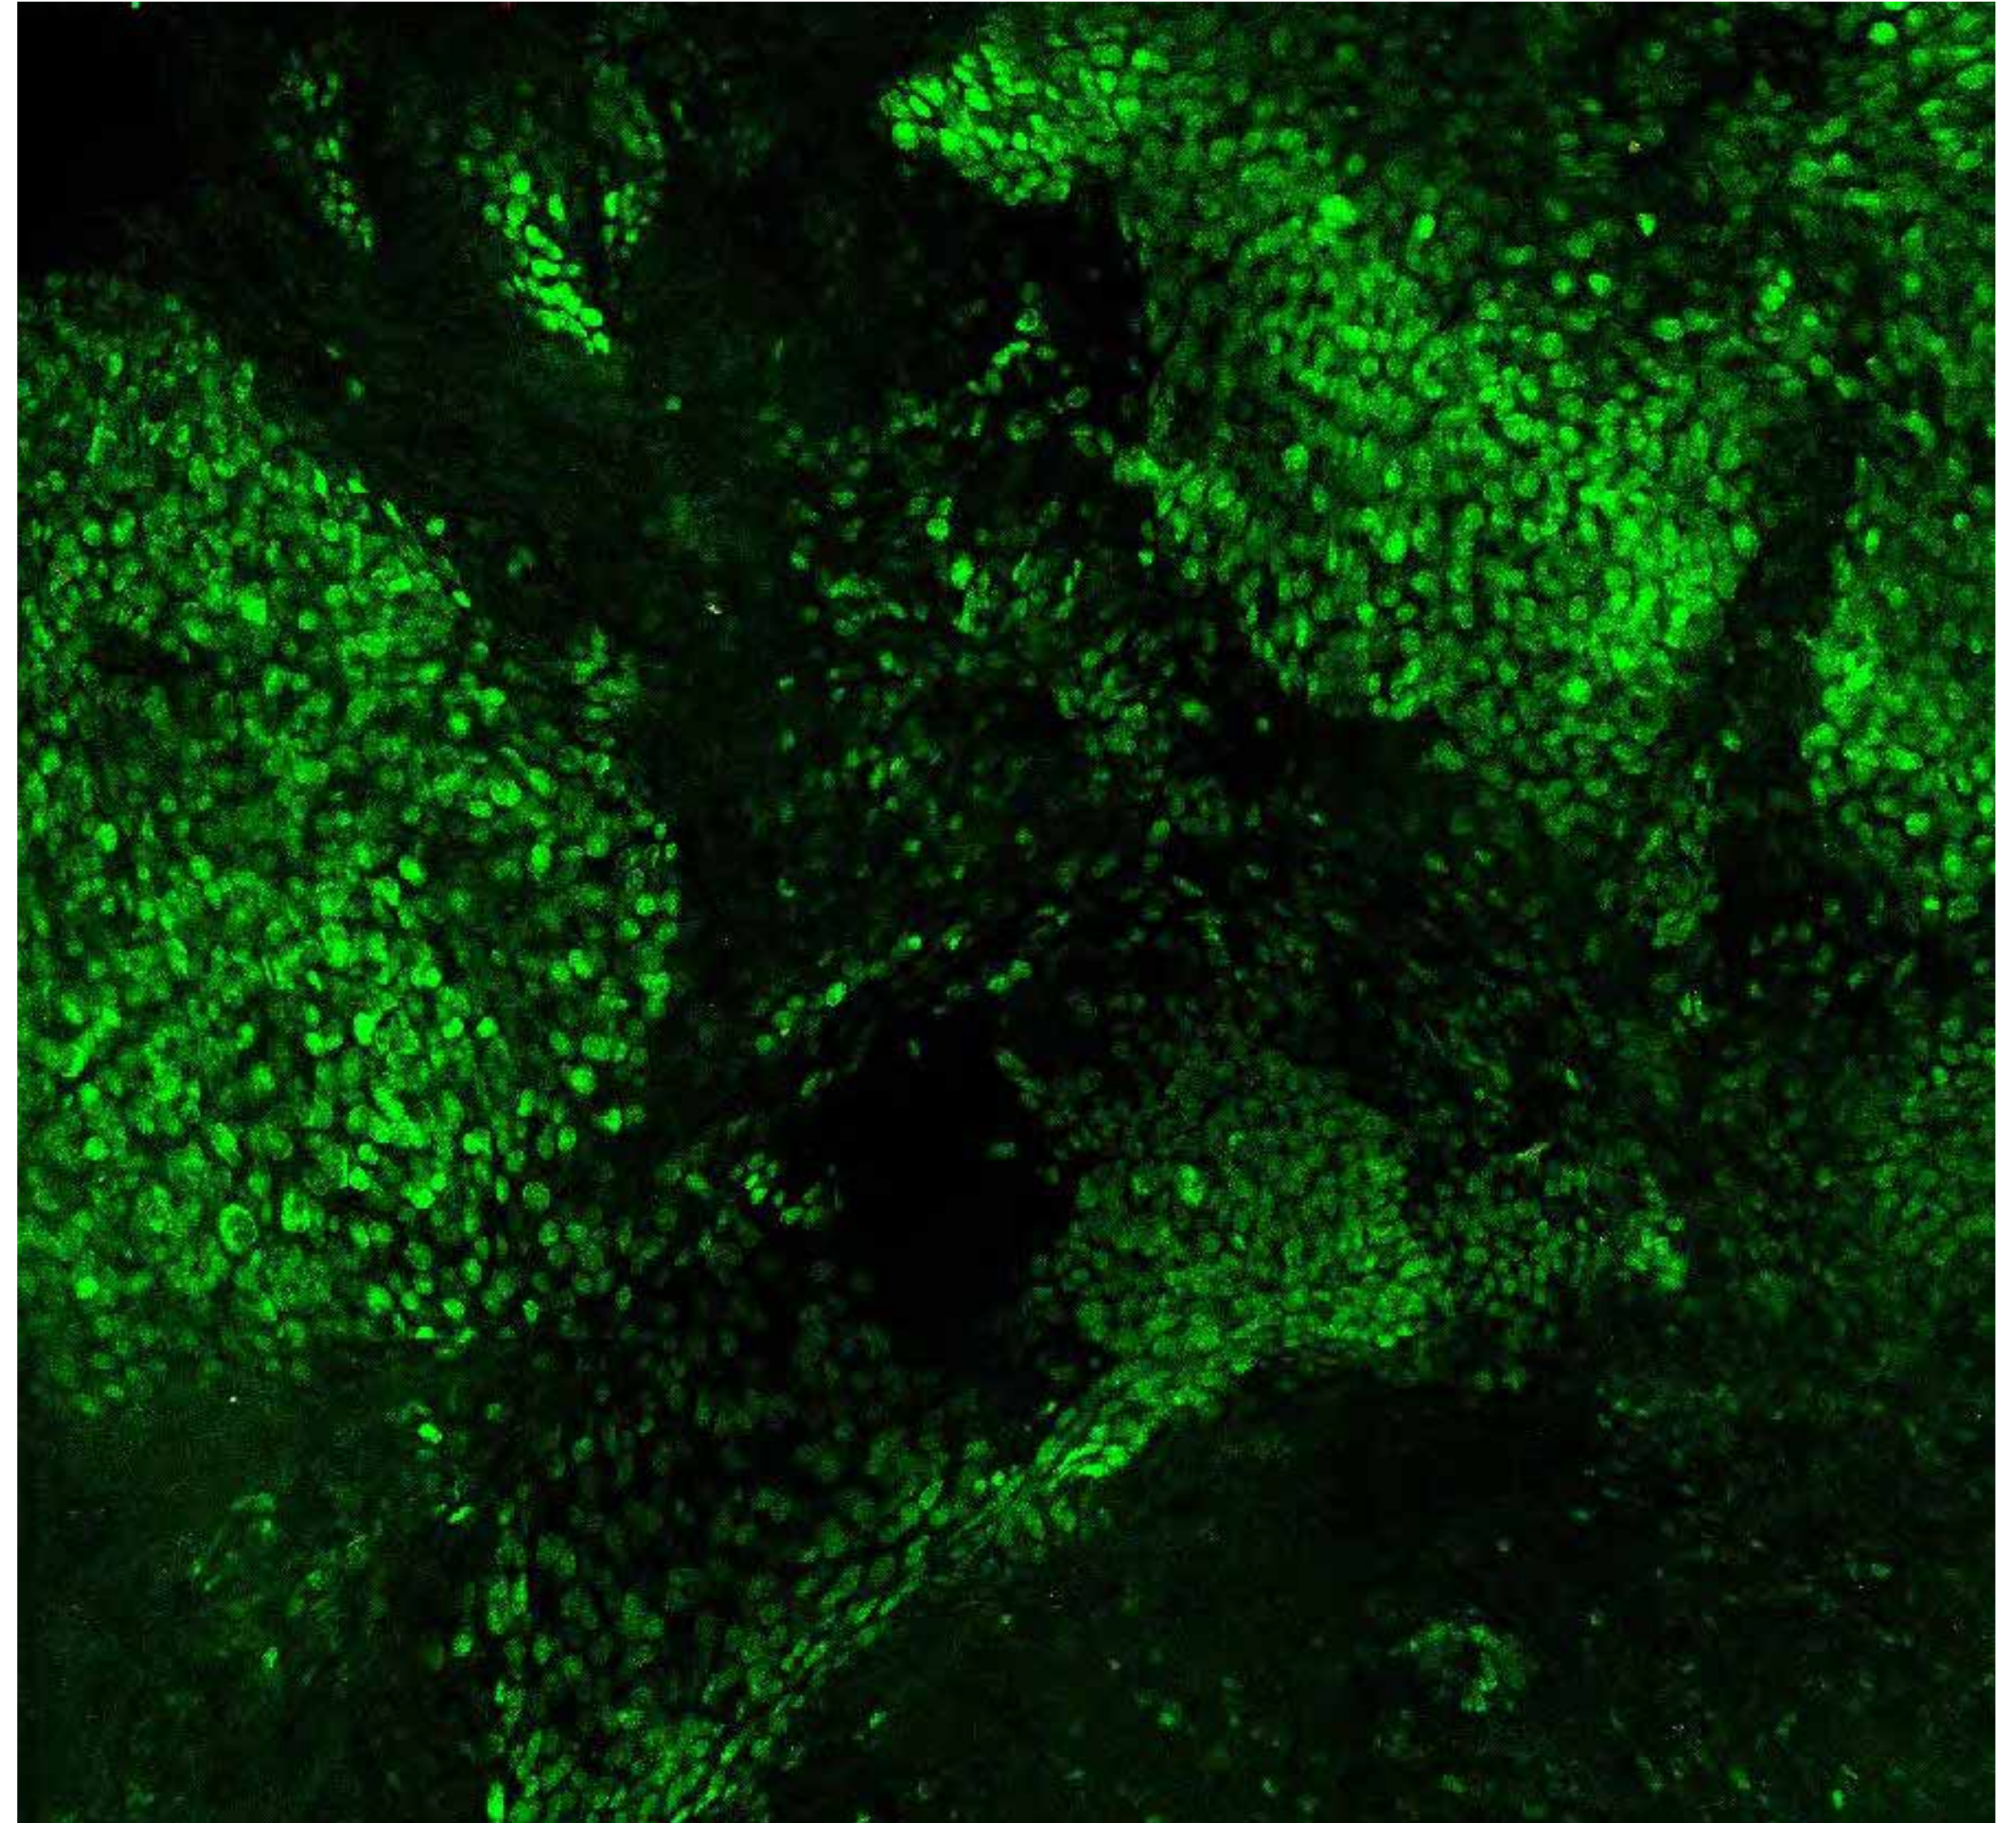

PARPi-FL (green) + Autofluorescence (red/yellow)



1472

Close-up

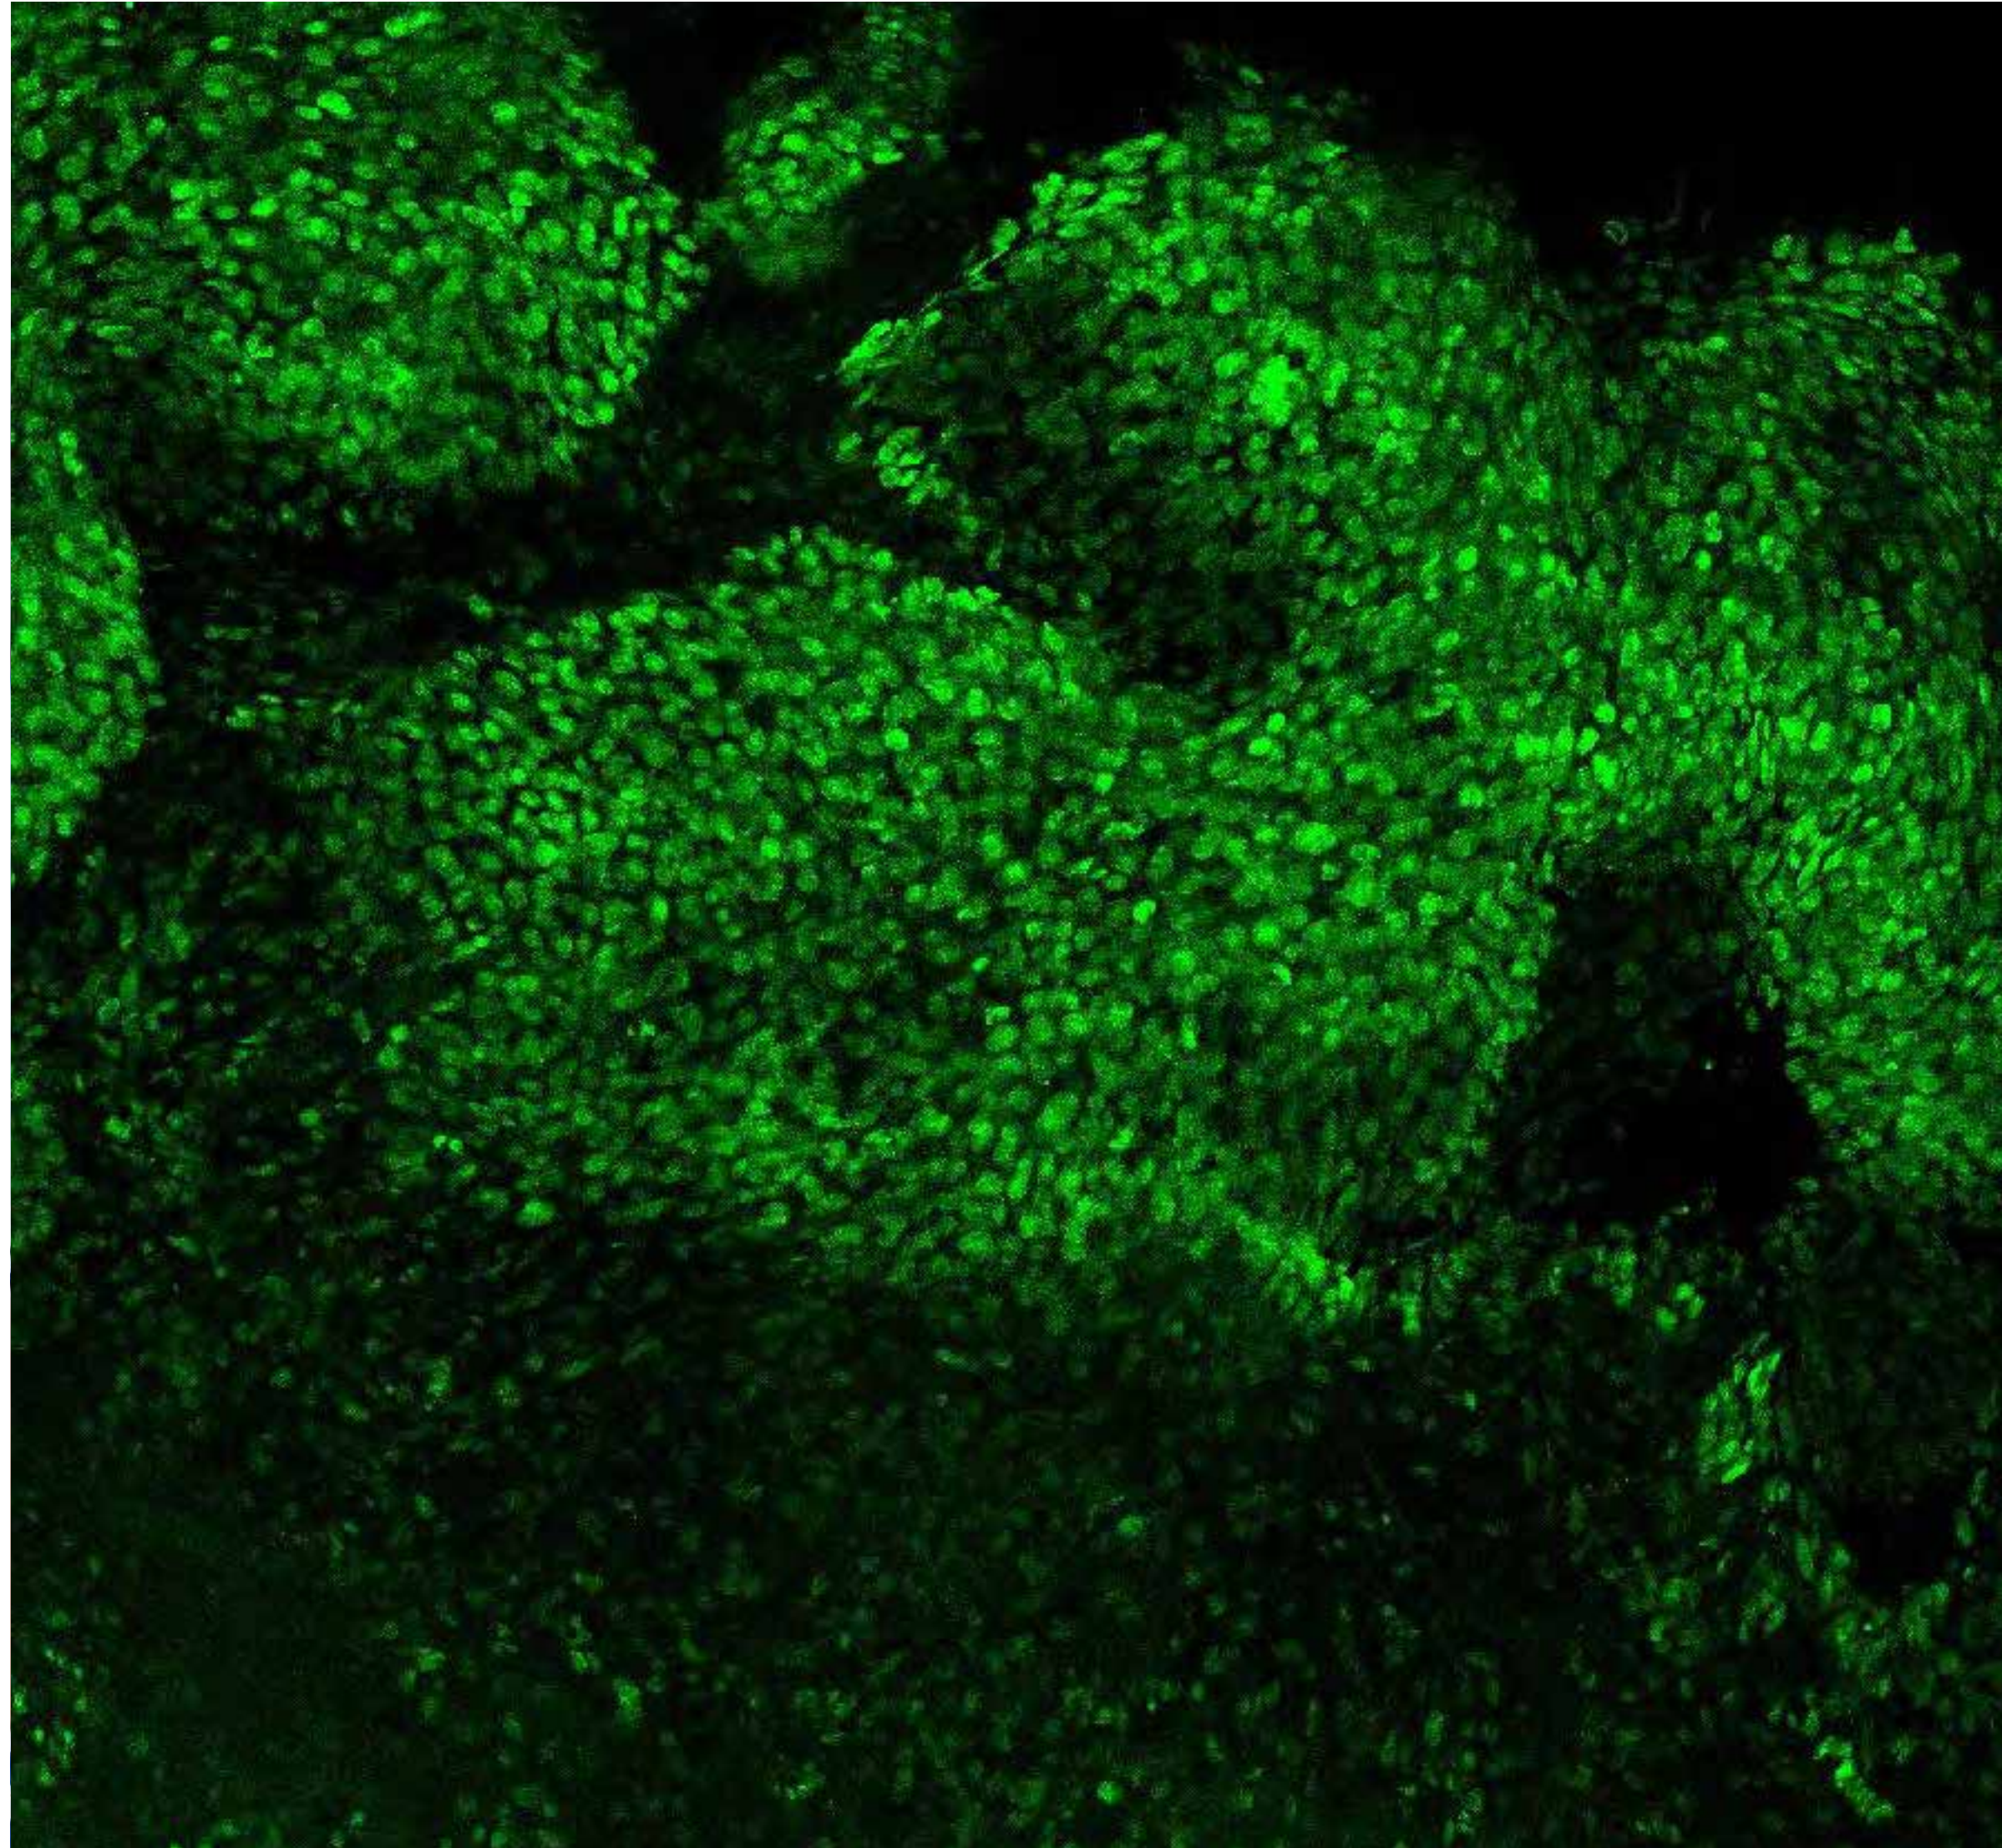

PARPi-FL only (green)

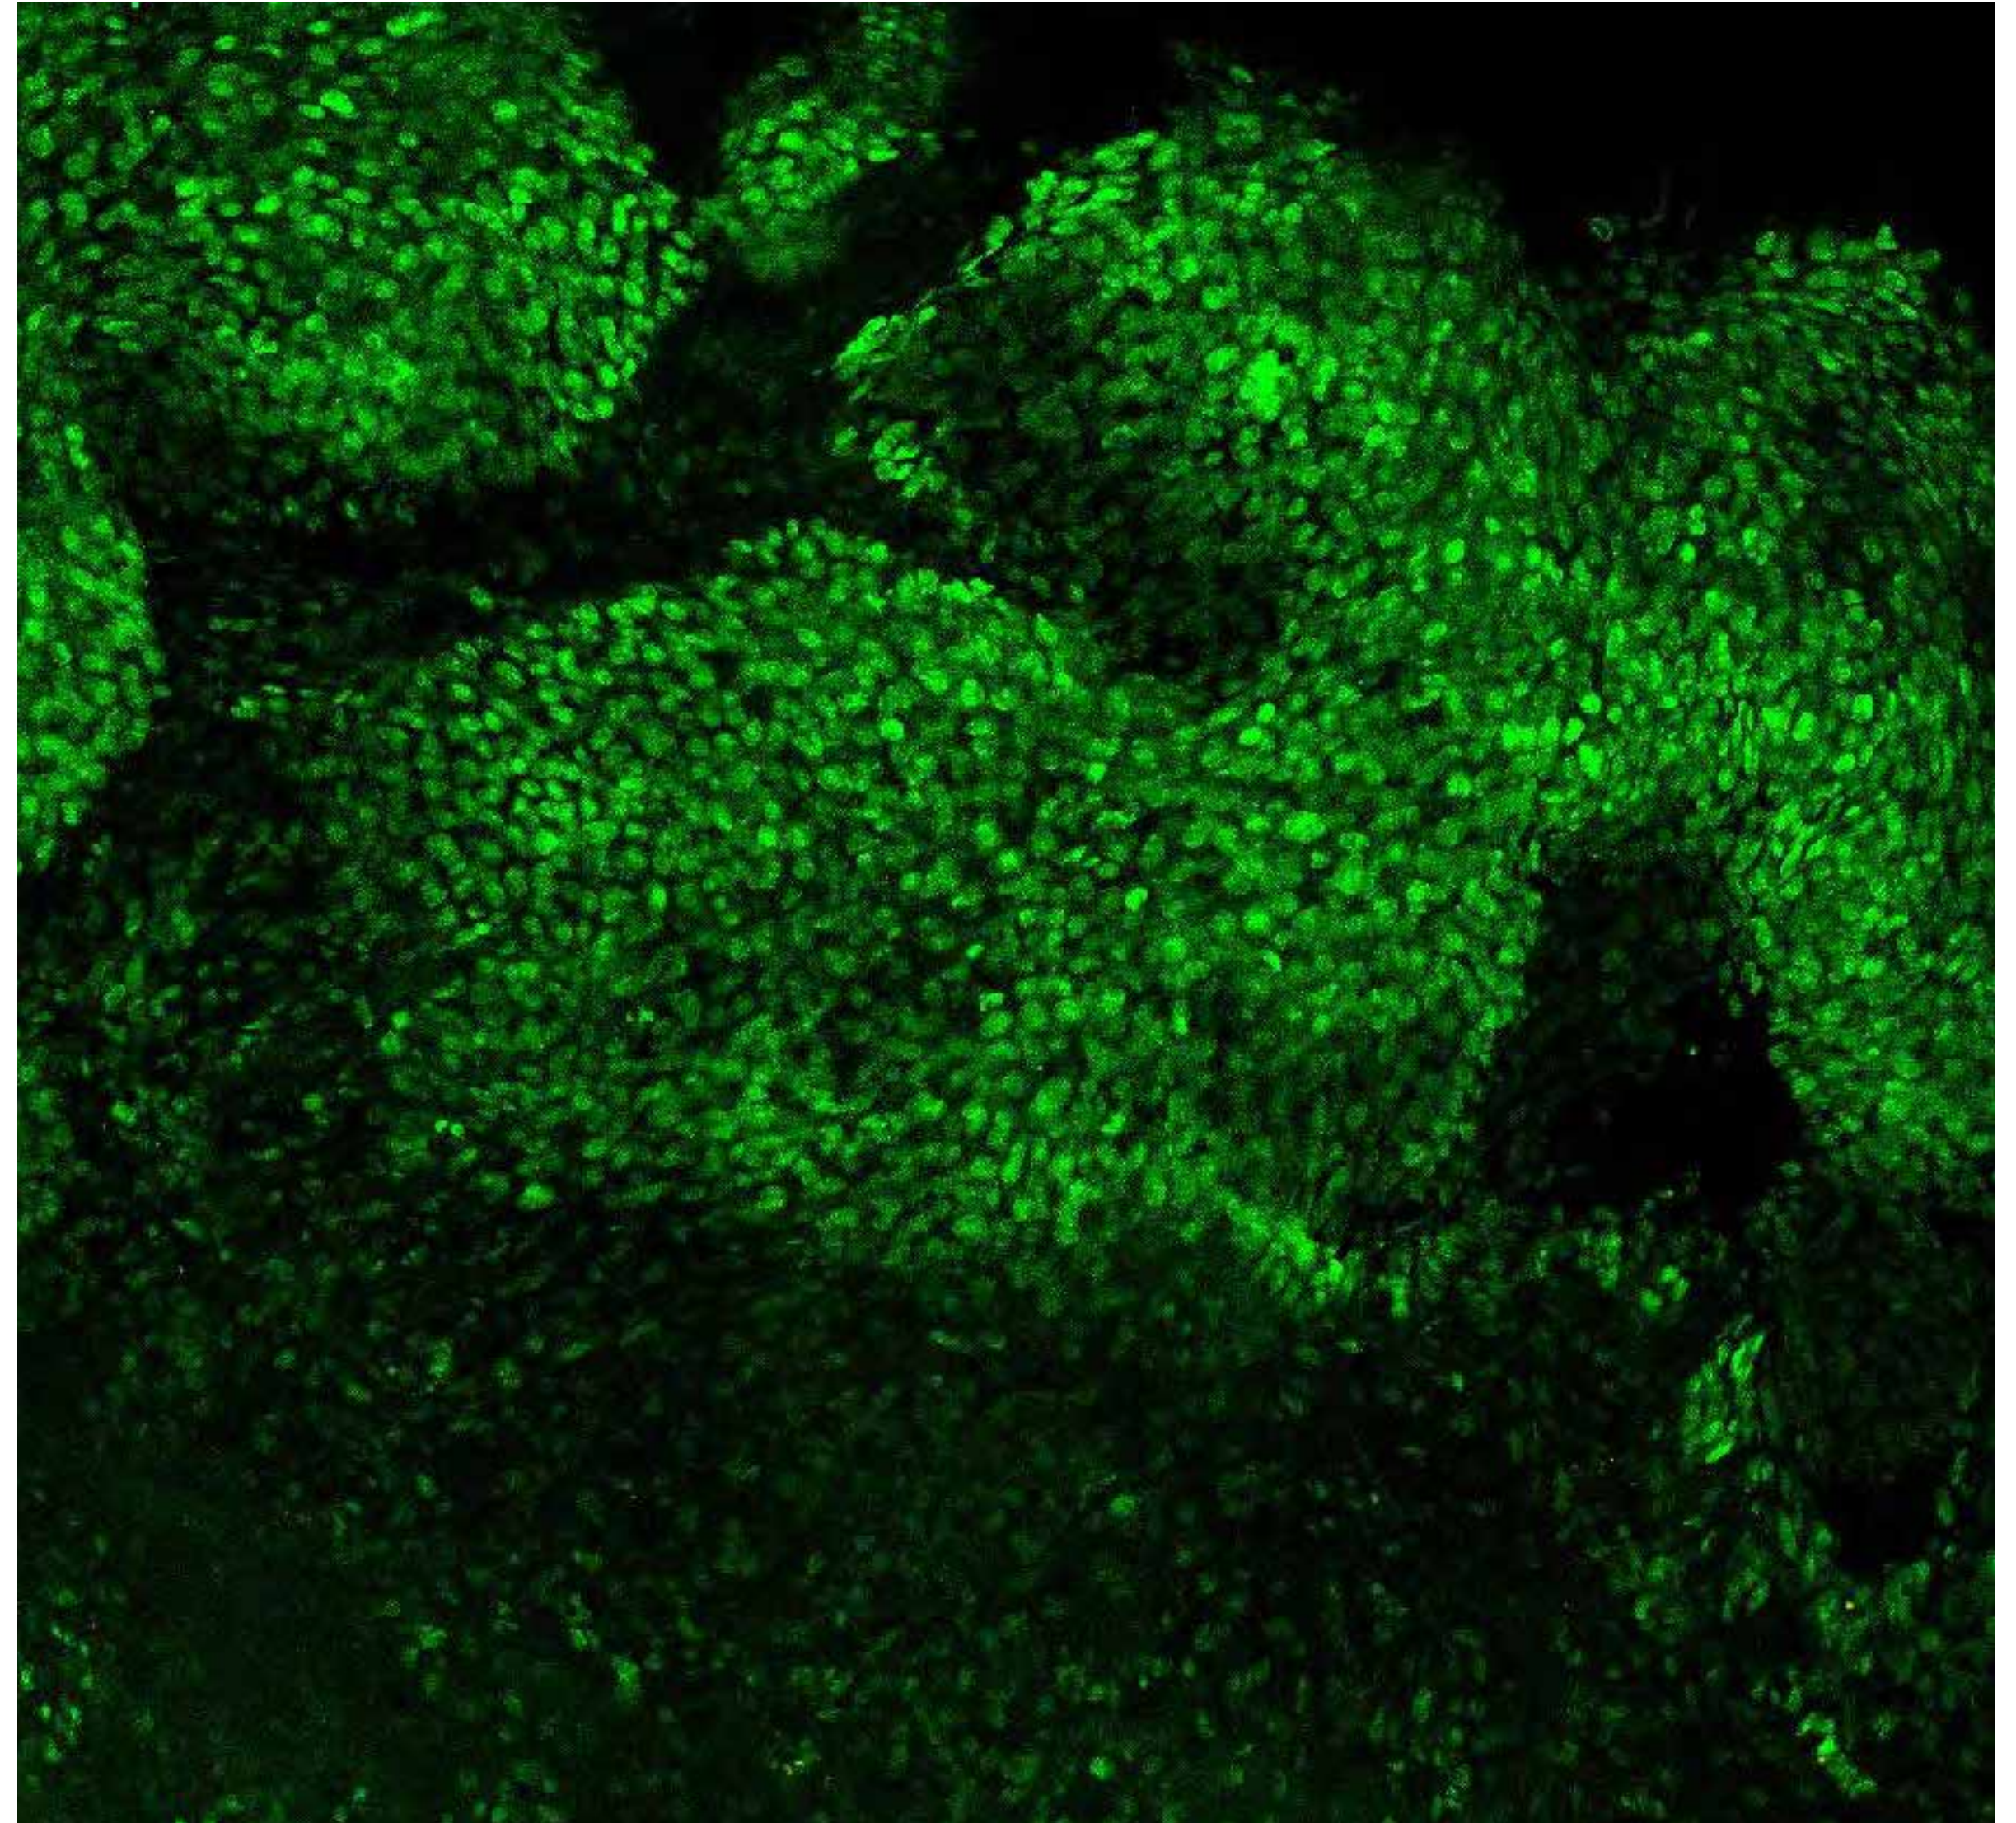

PARPi-FL (green) + Autofluorescence (red/yellow)



1472

Close-up

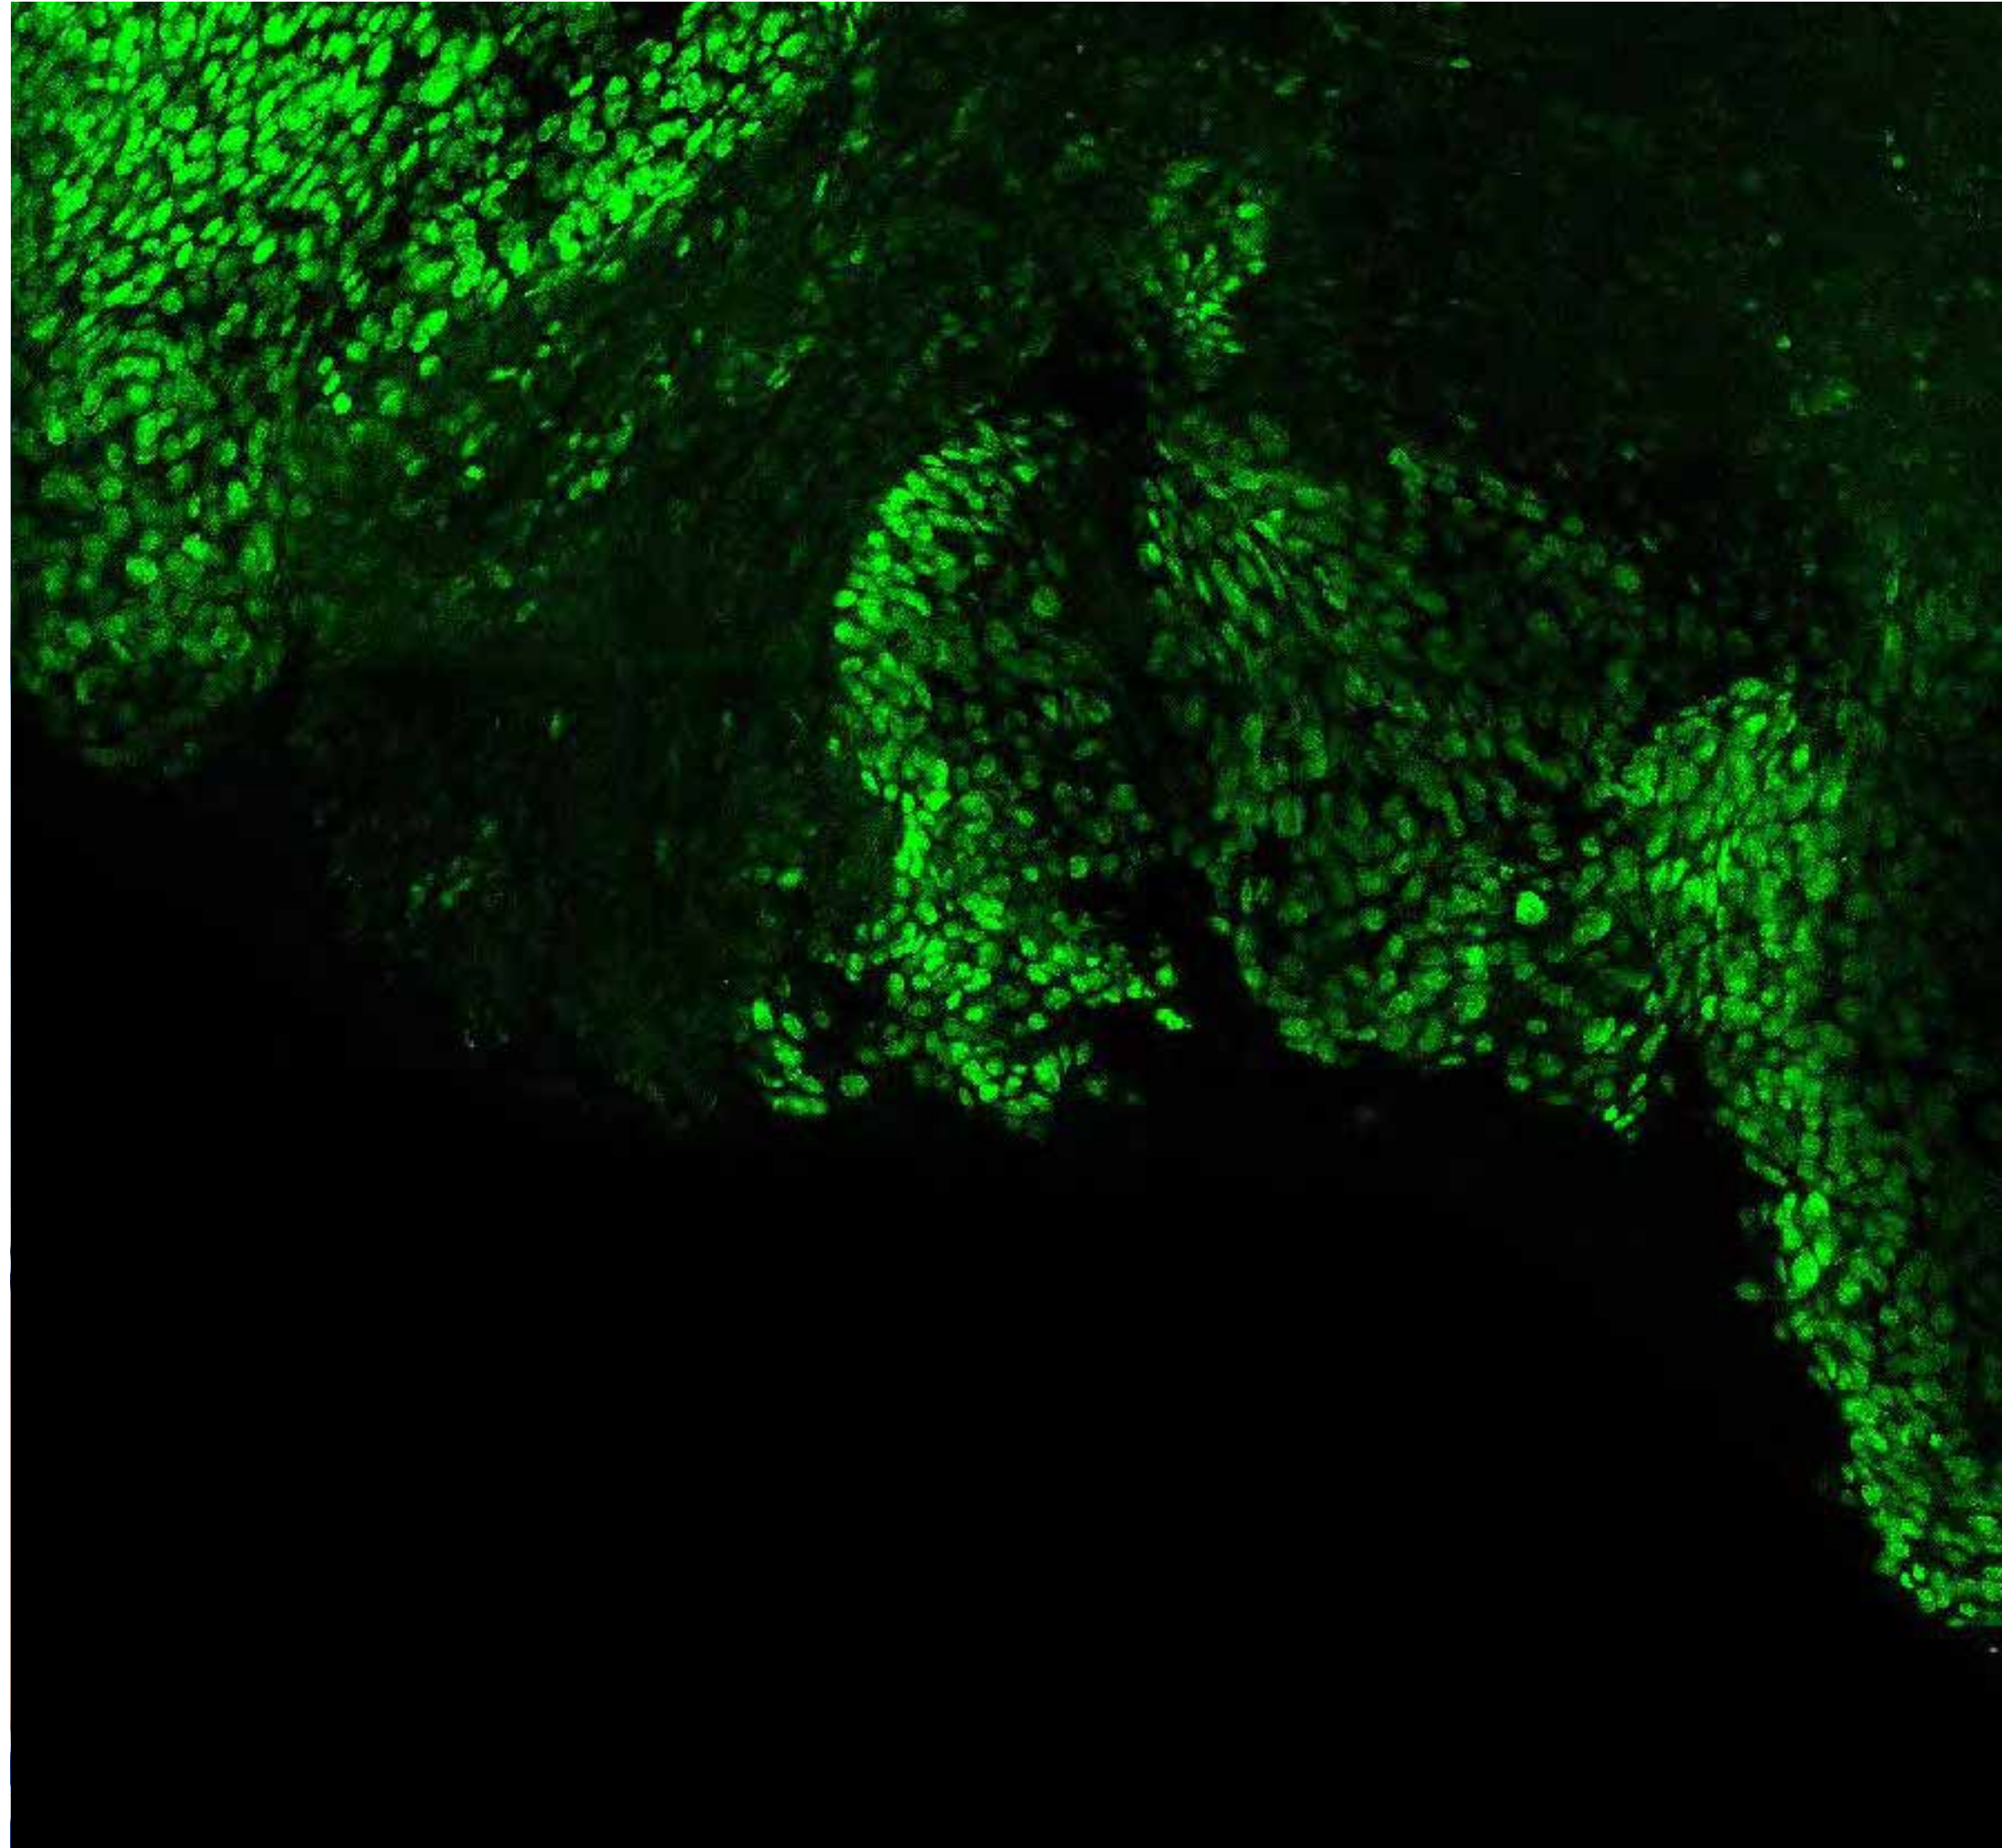

PARPi-FL only (green)

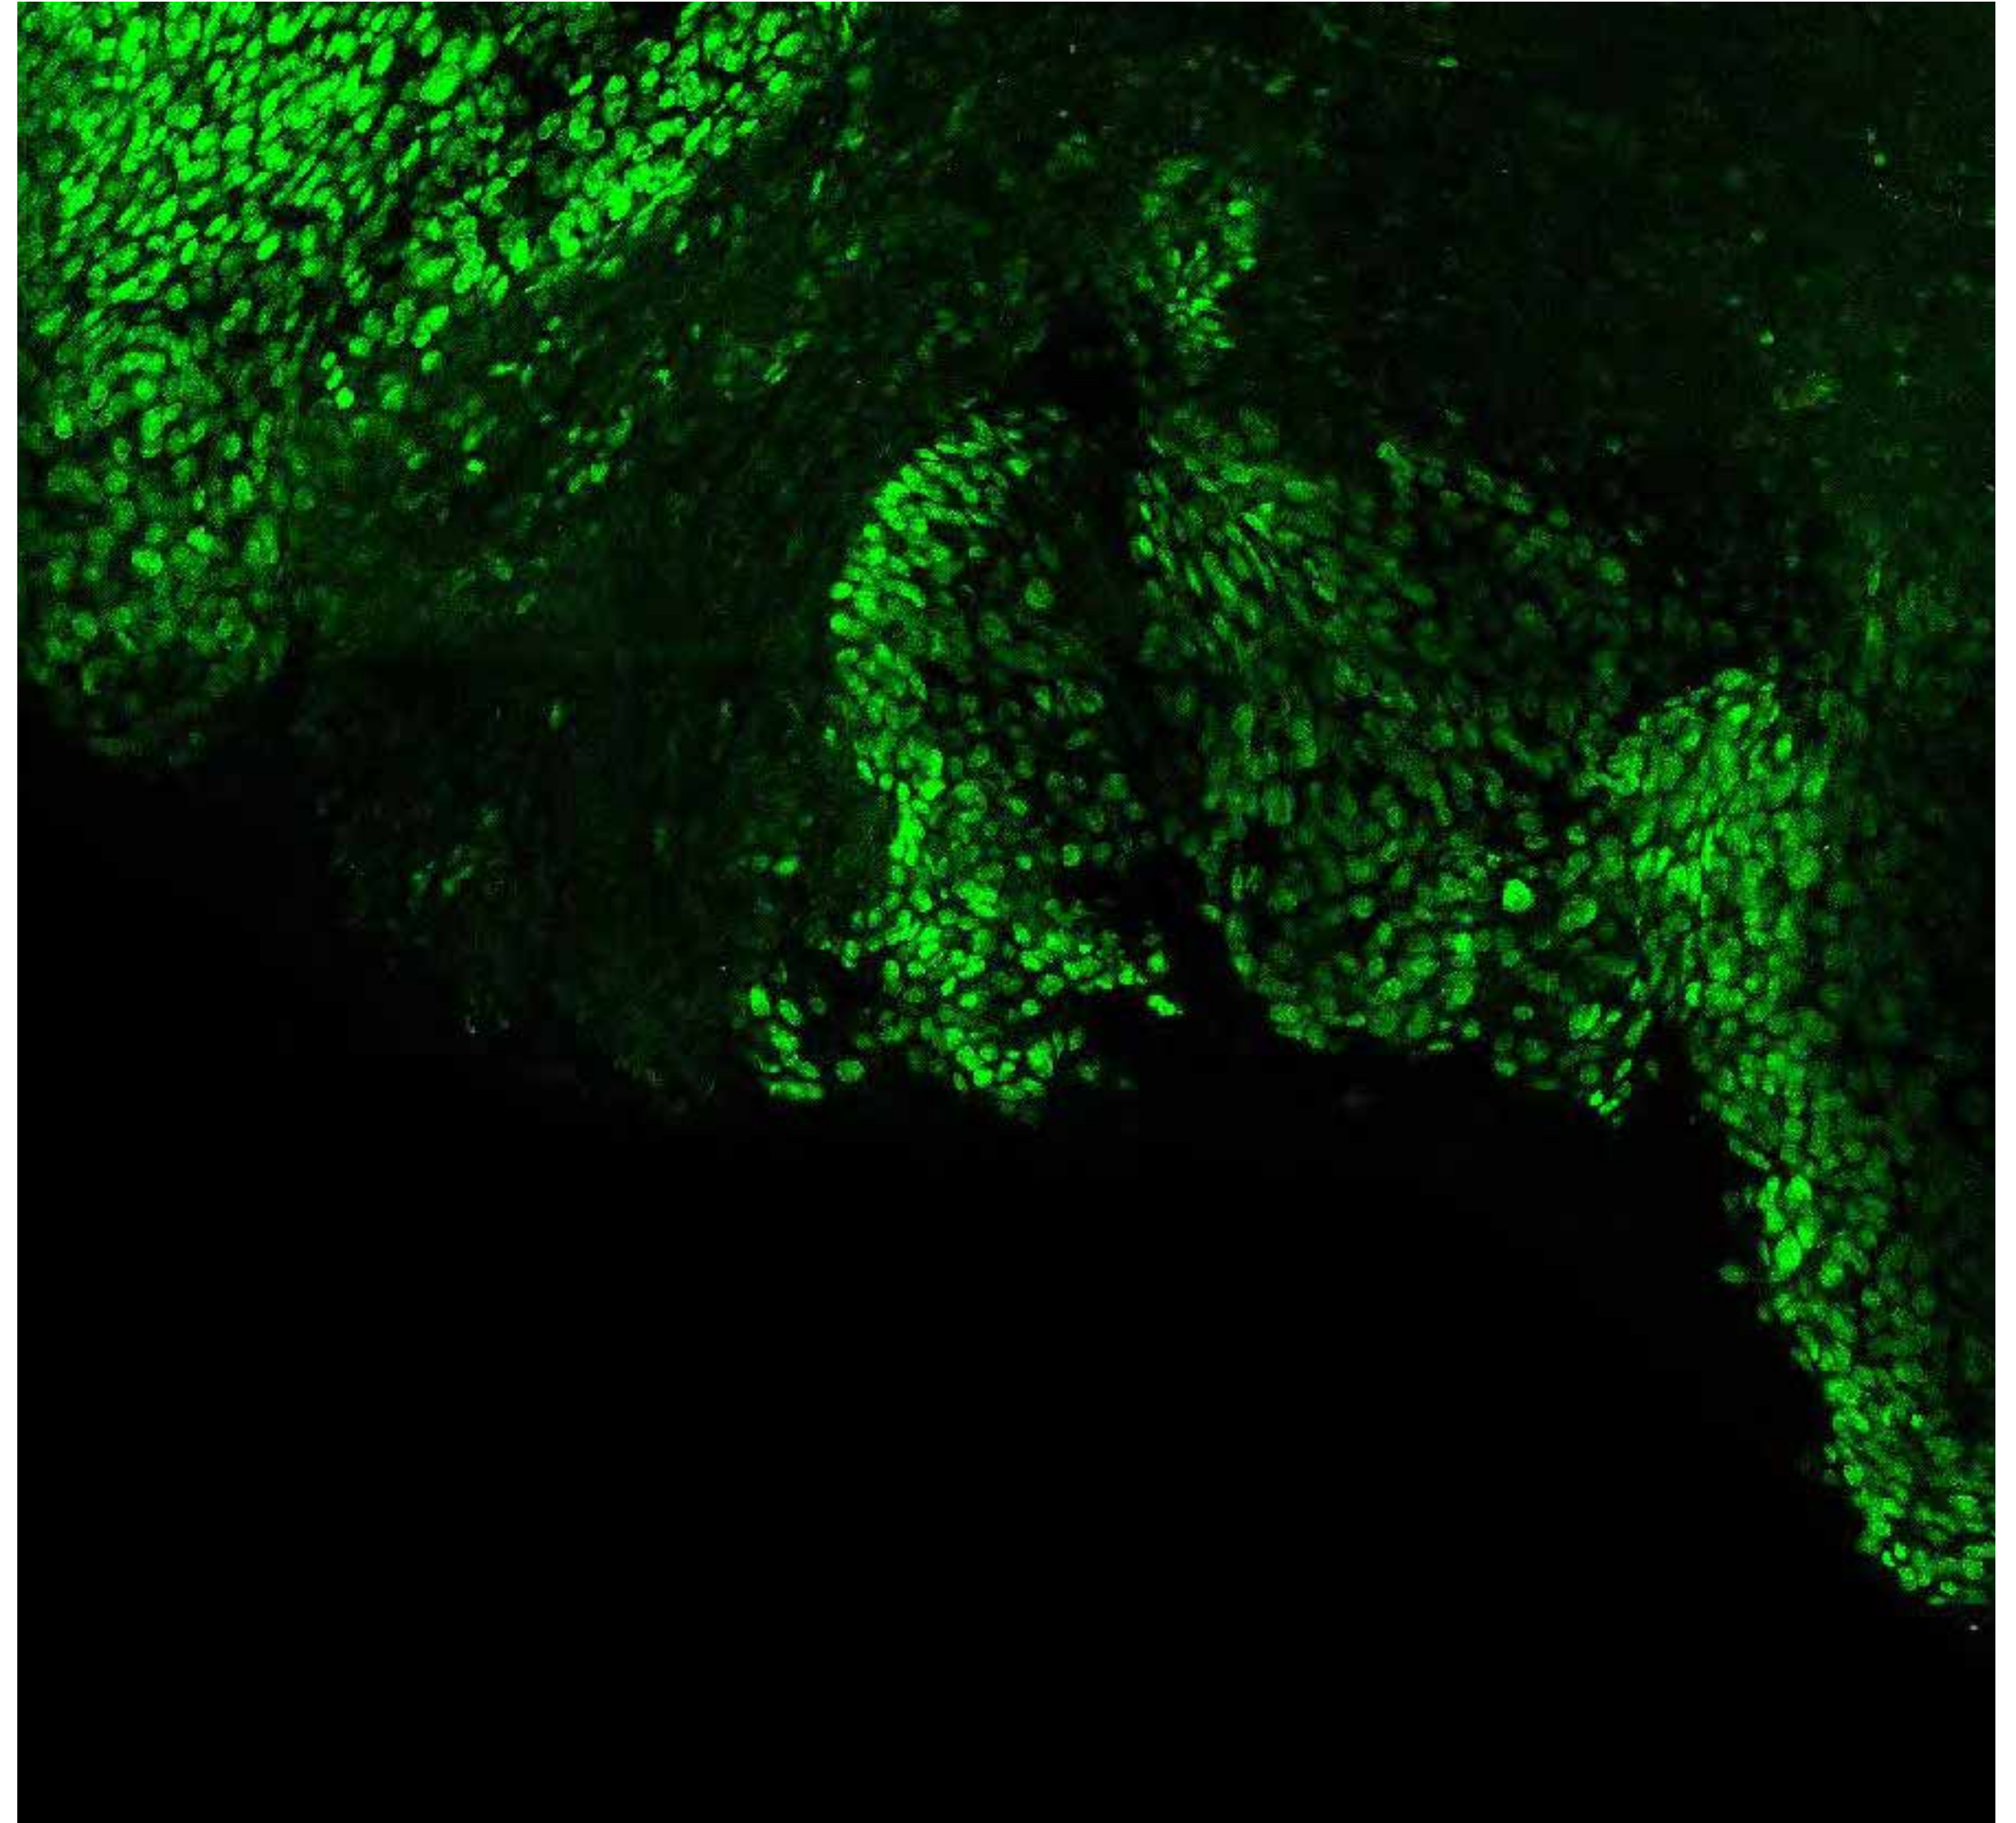

PARPi-FL (green) + Autofluorescence (red/yellow)



1472

Close-up

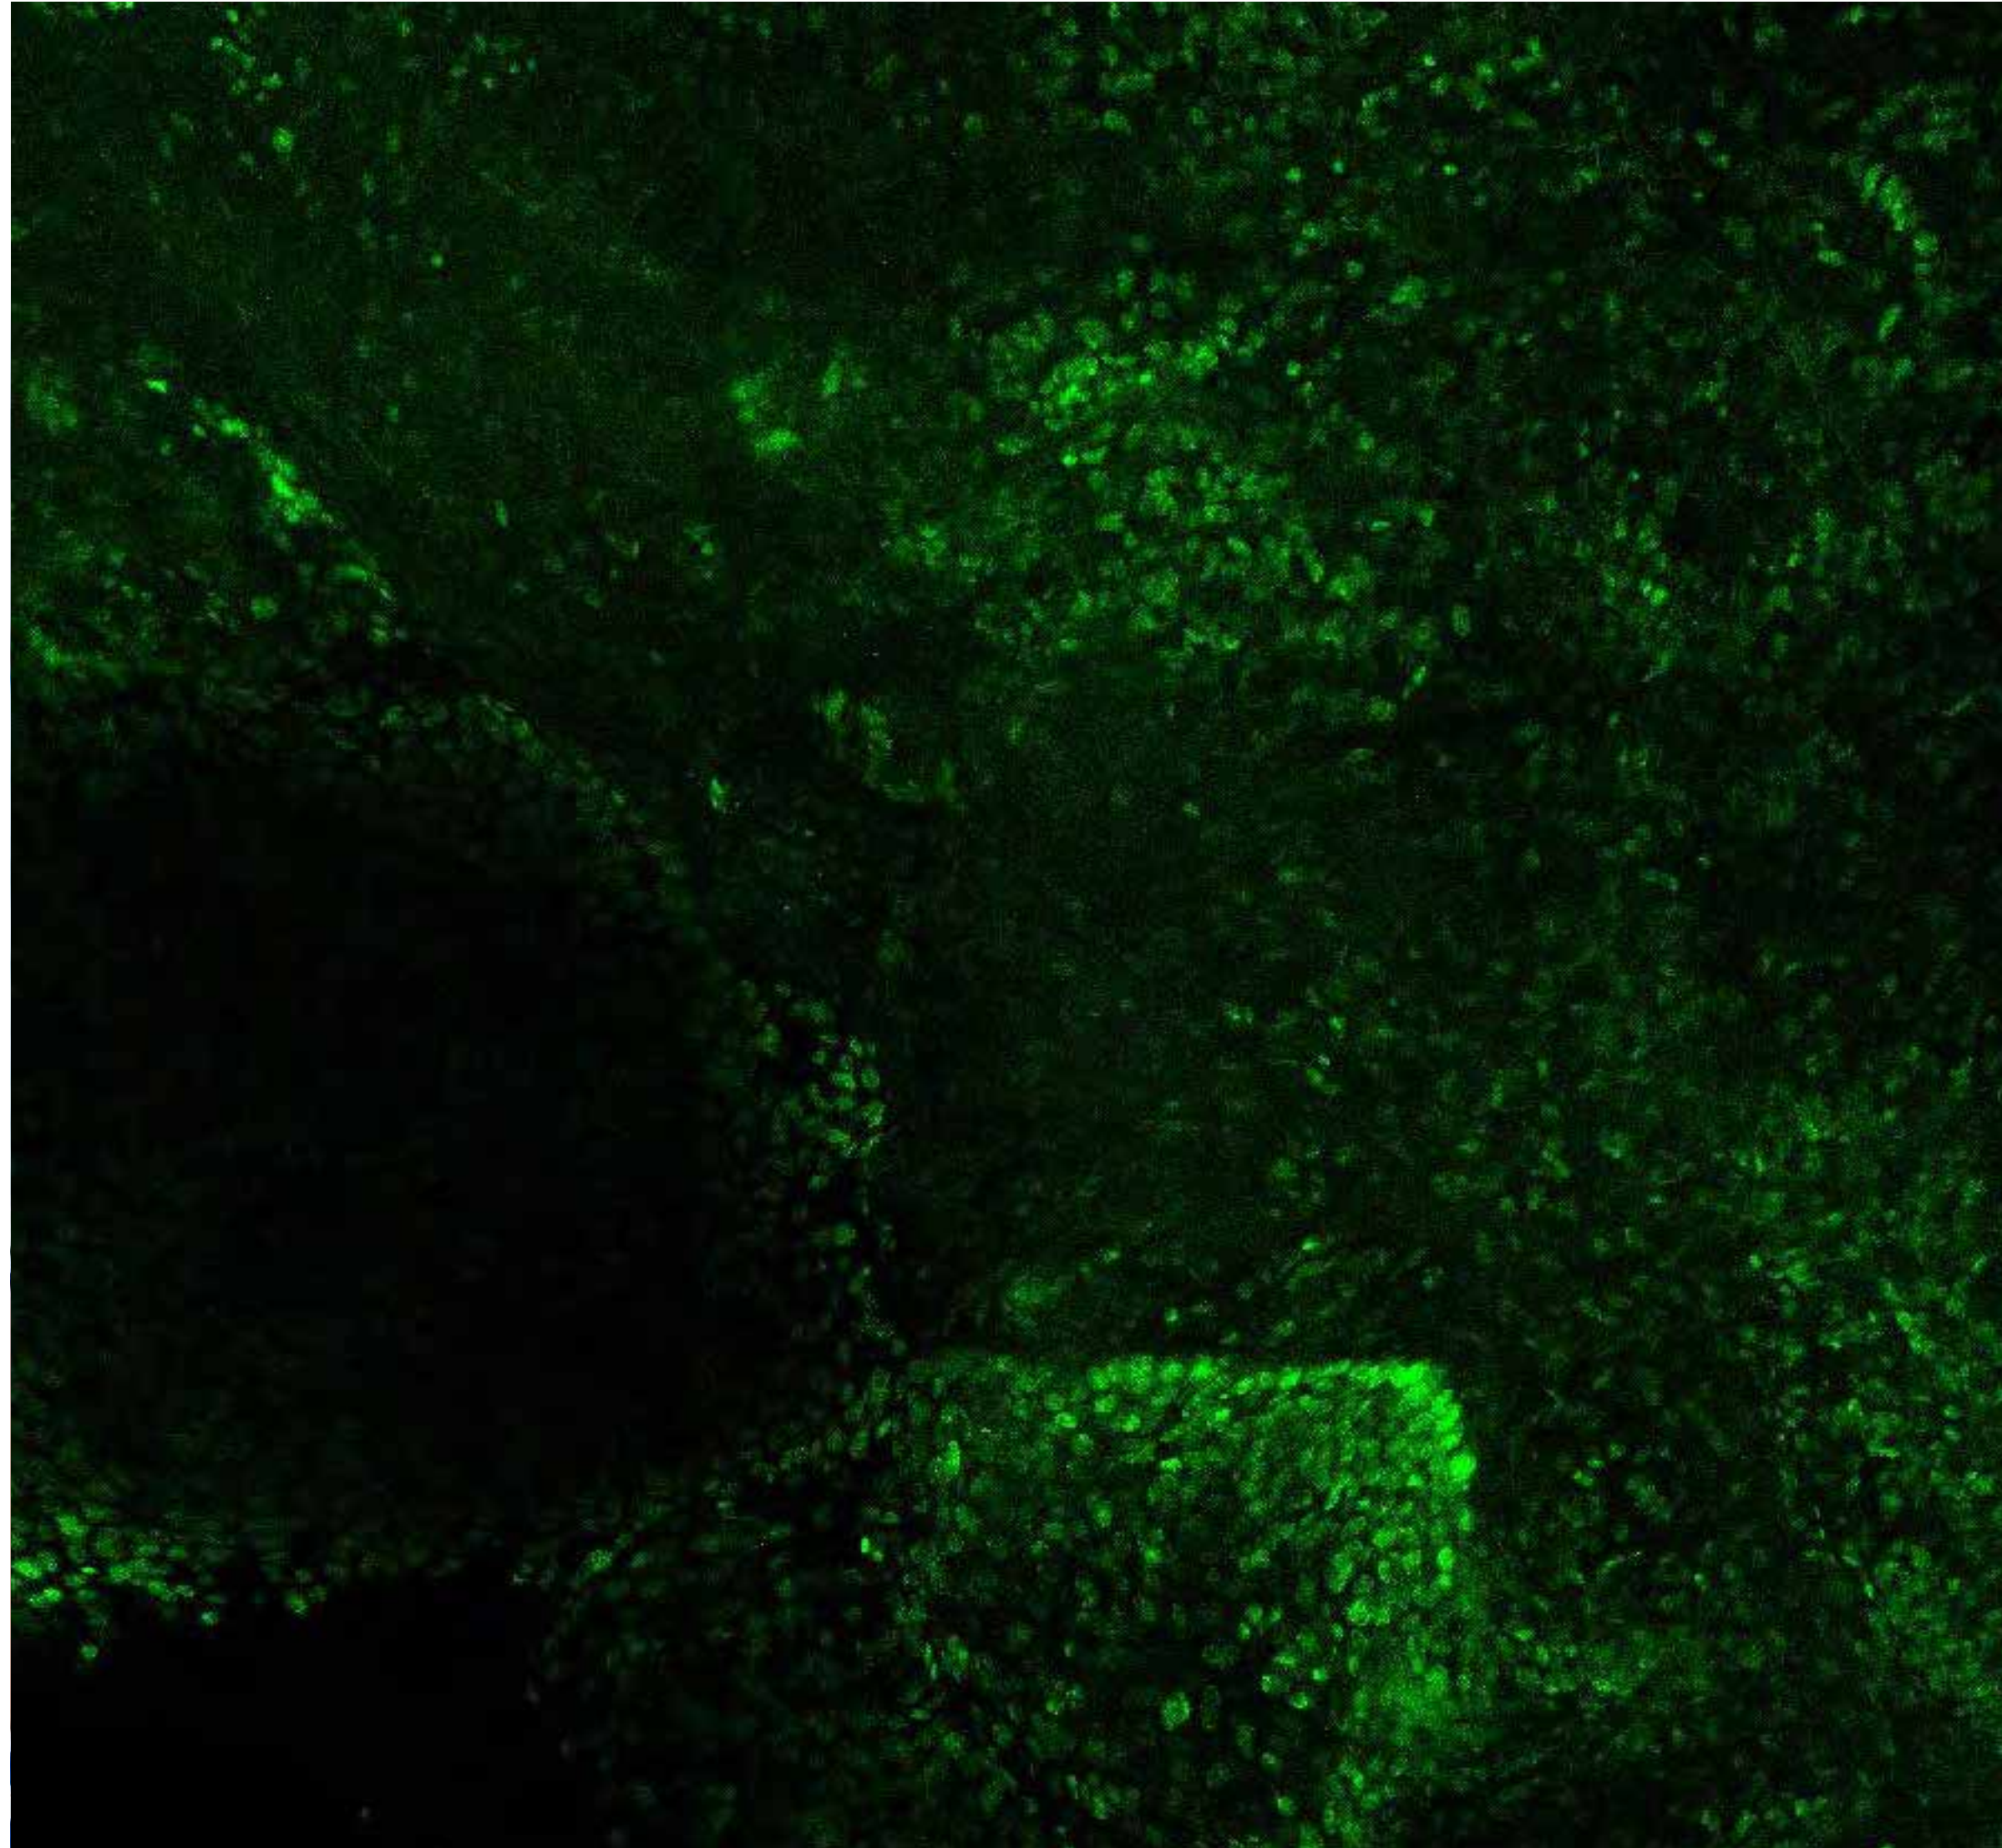

PARPi-FL only (green)

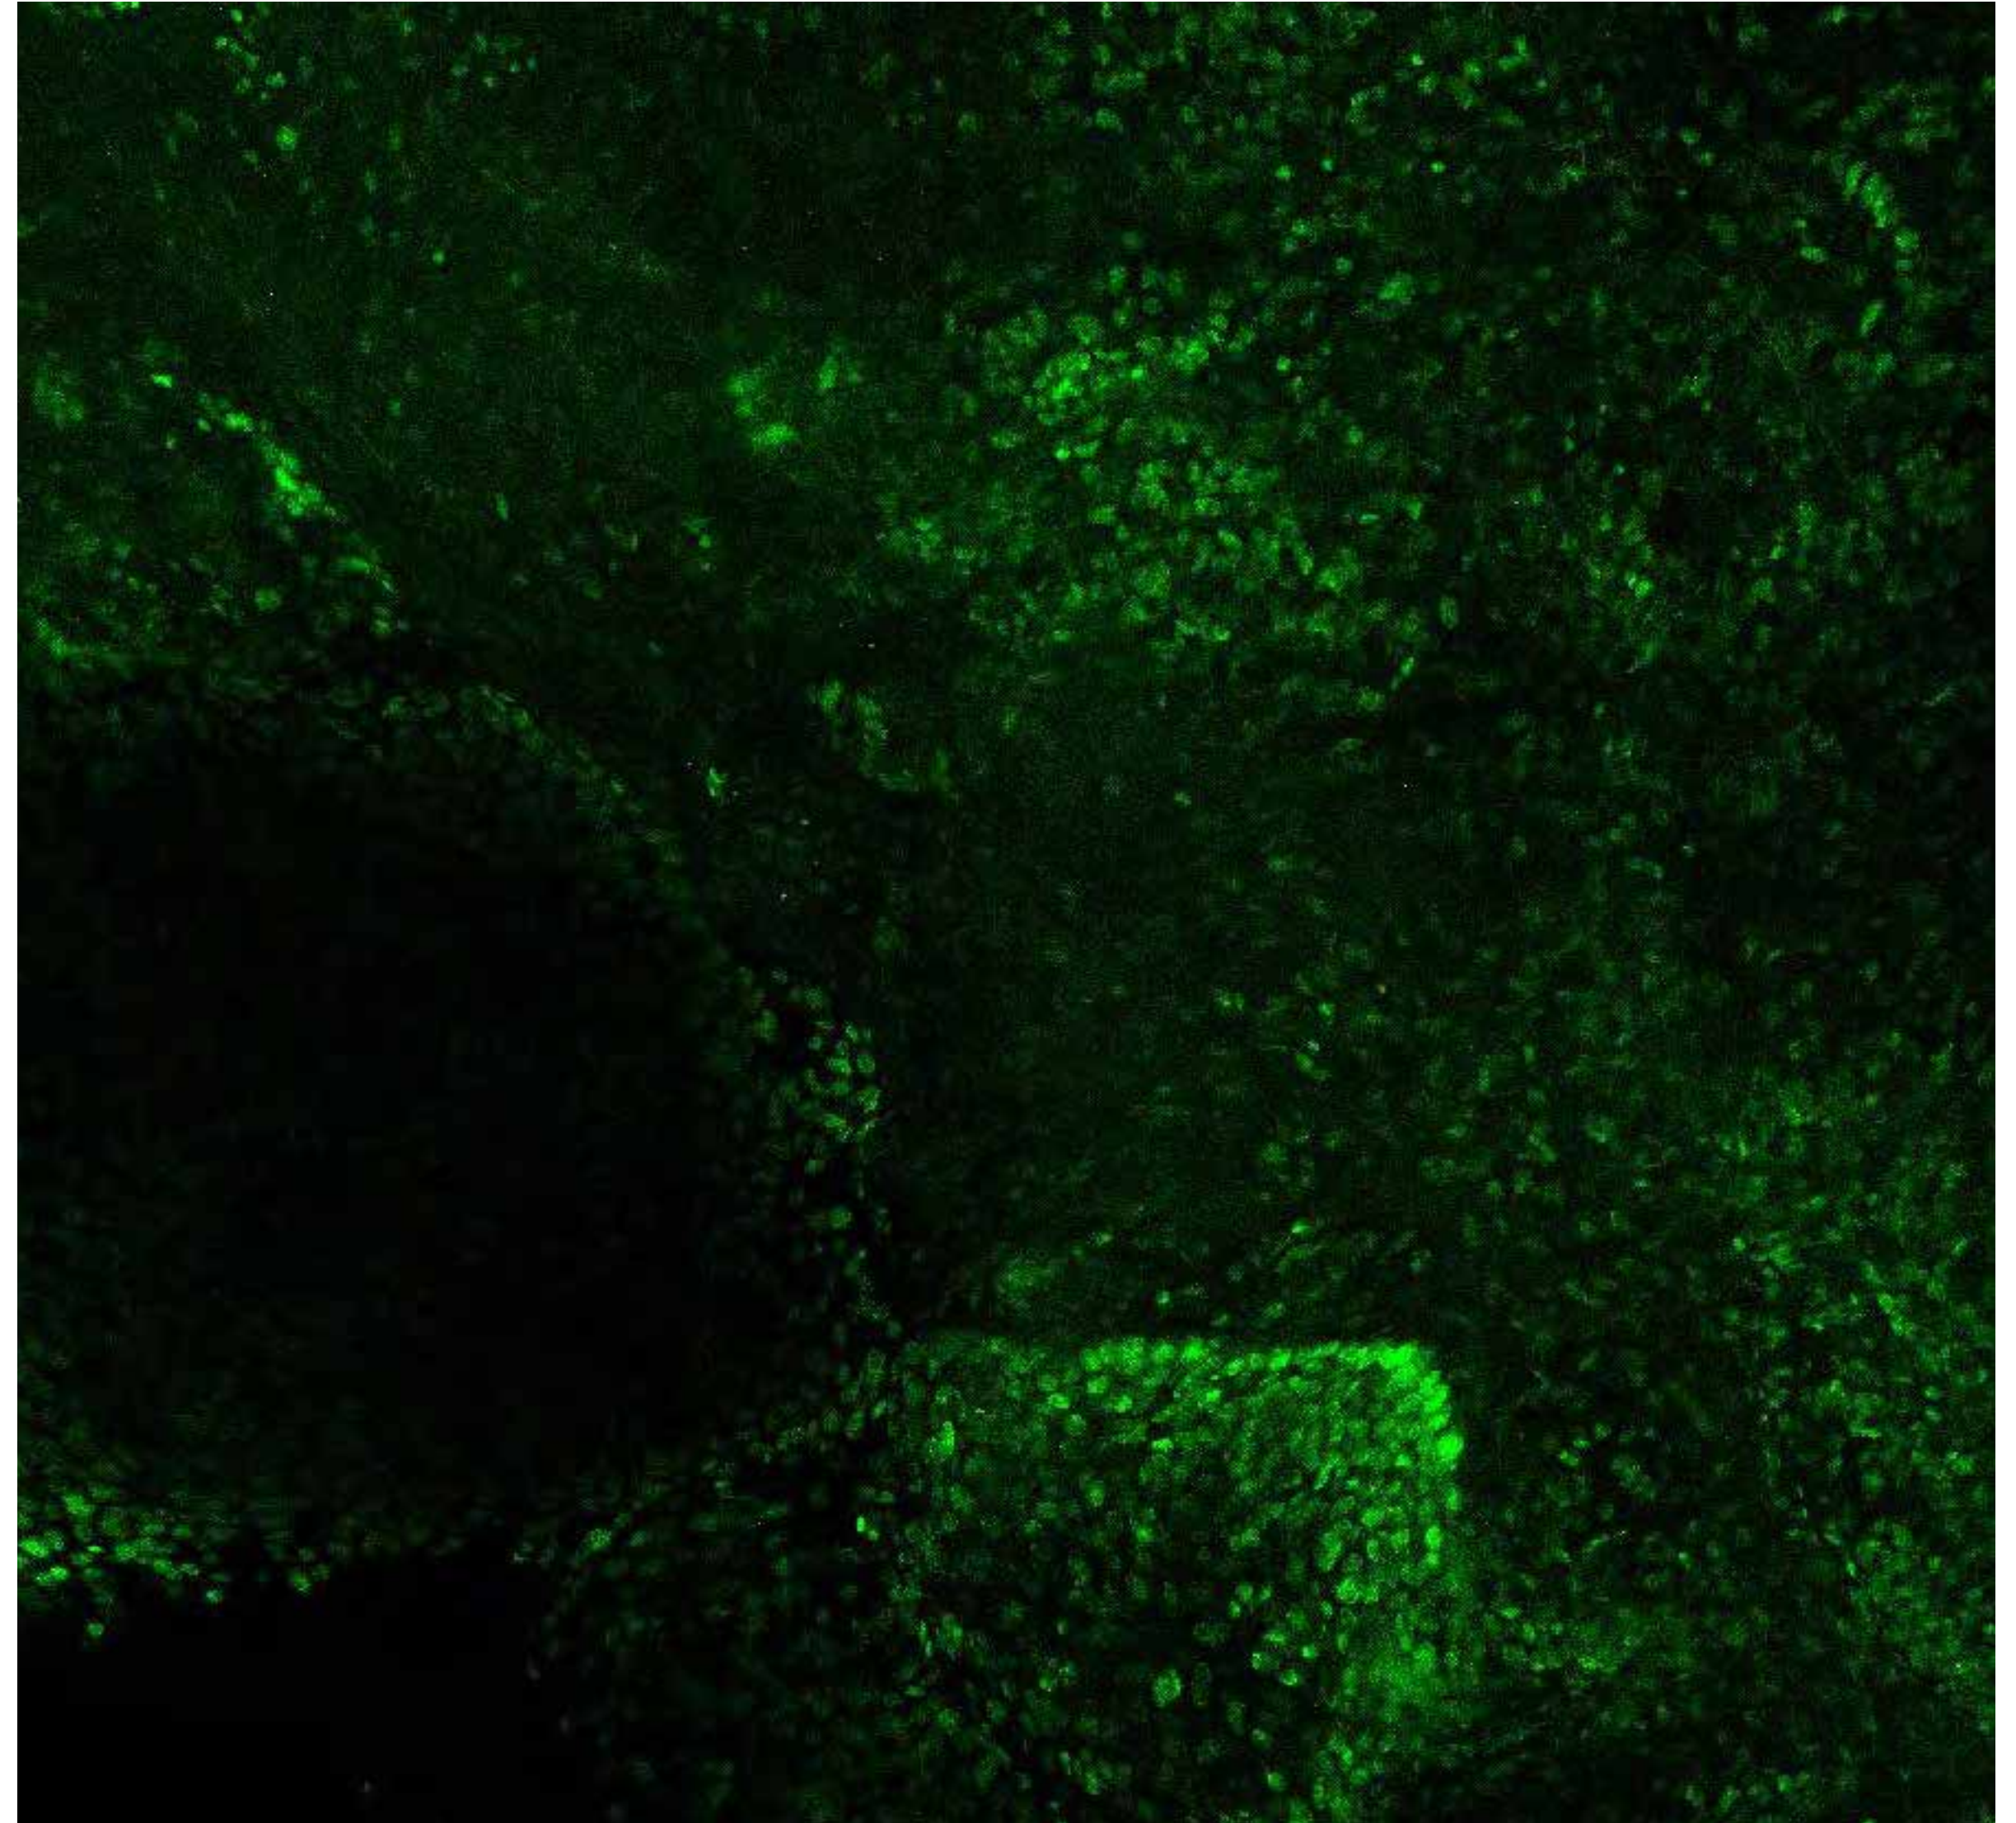

PARPi-FL (green) + Autofluorescence (red/yellow)



1472

10

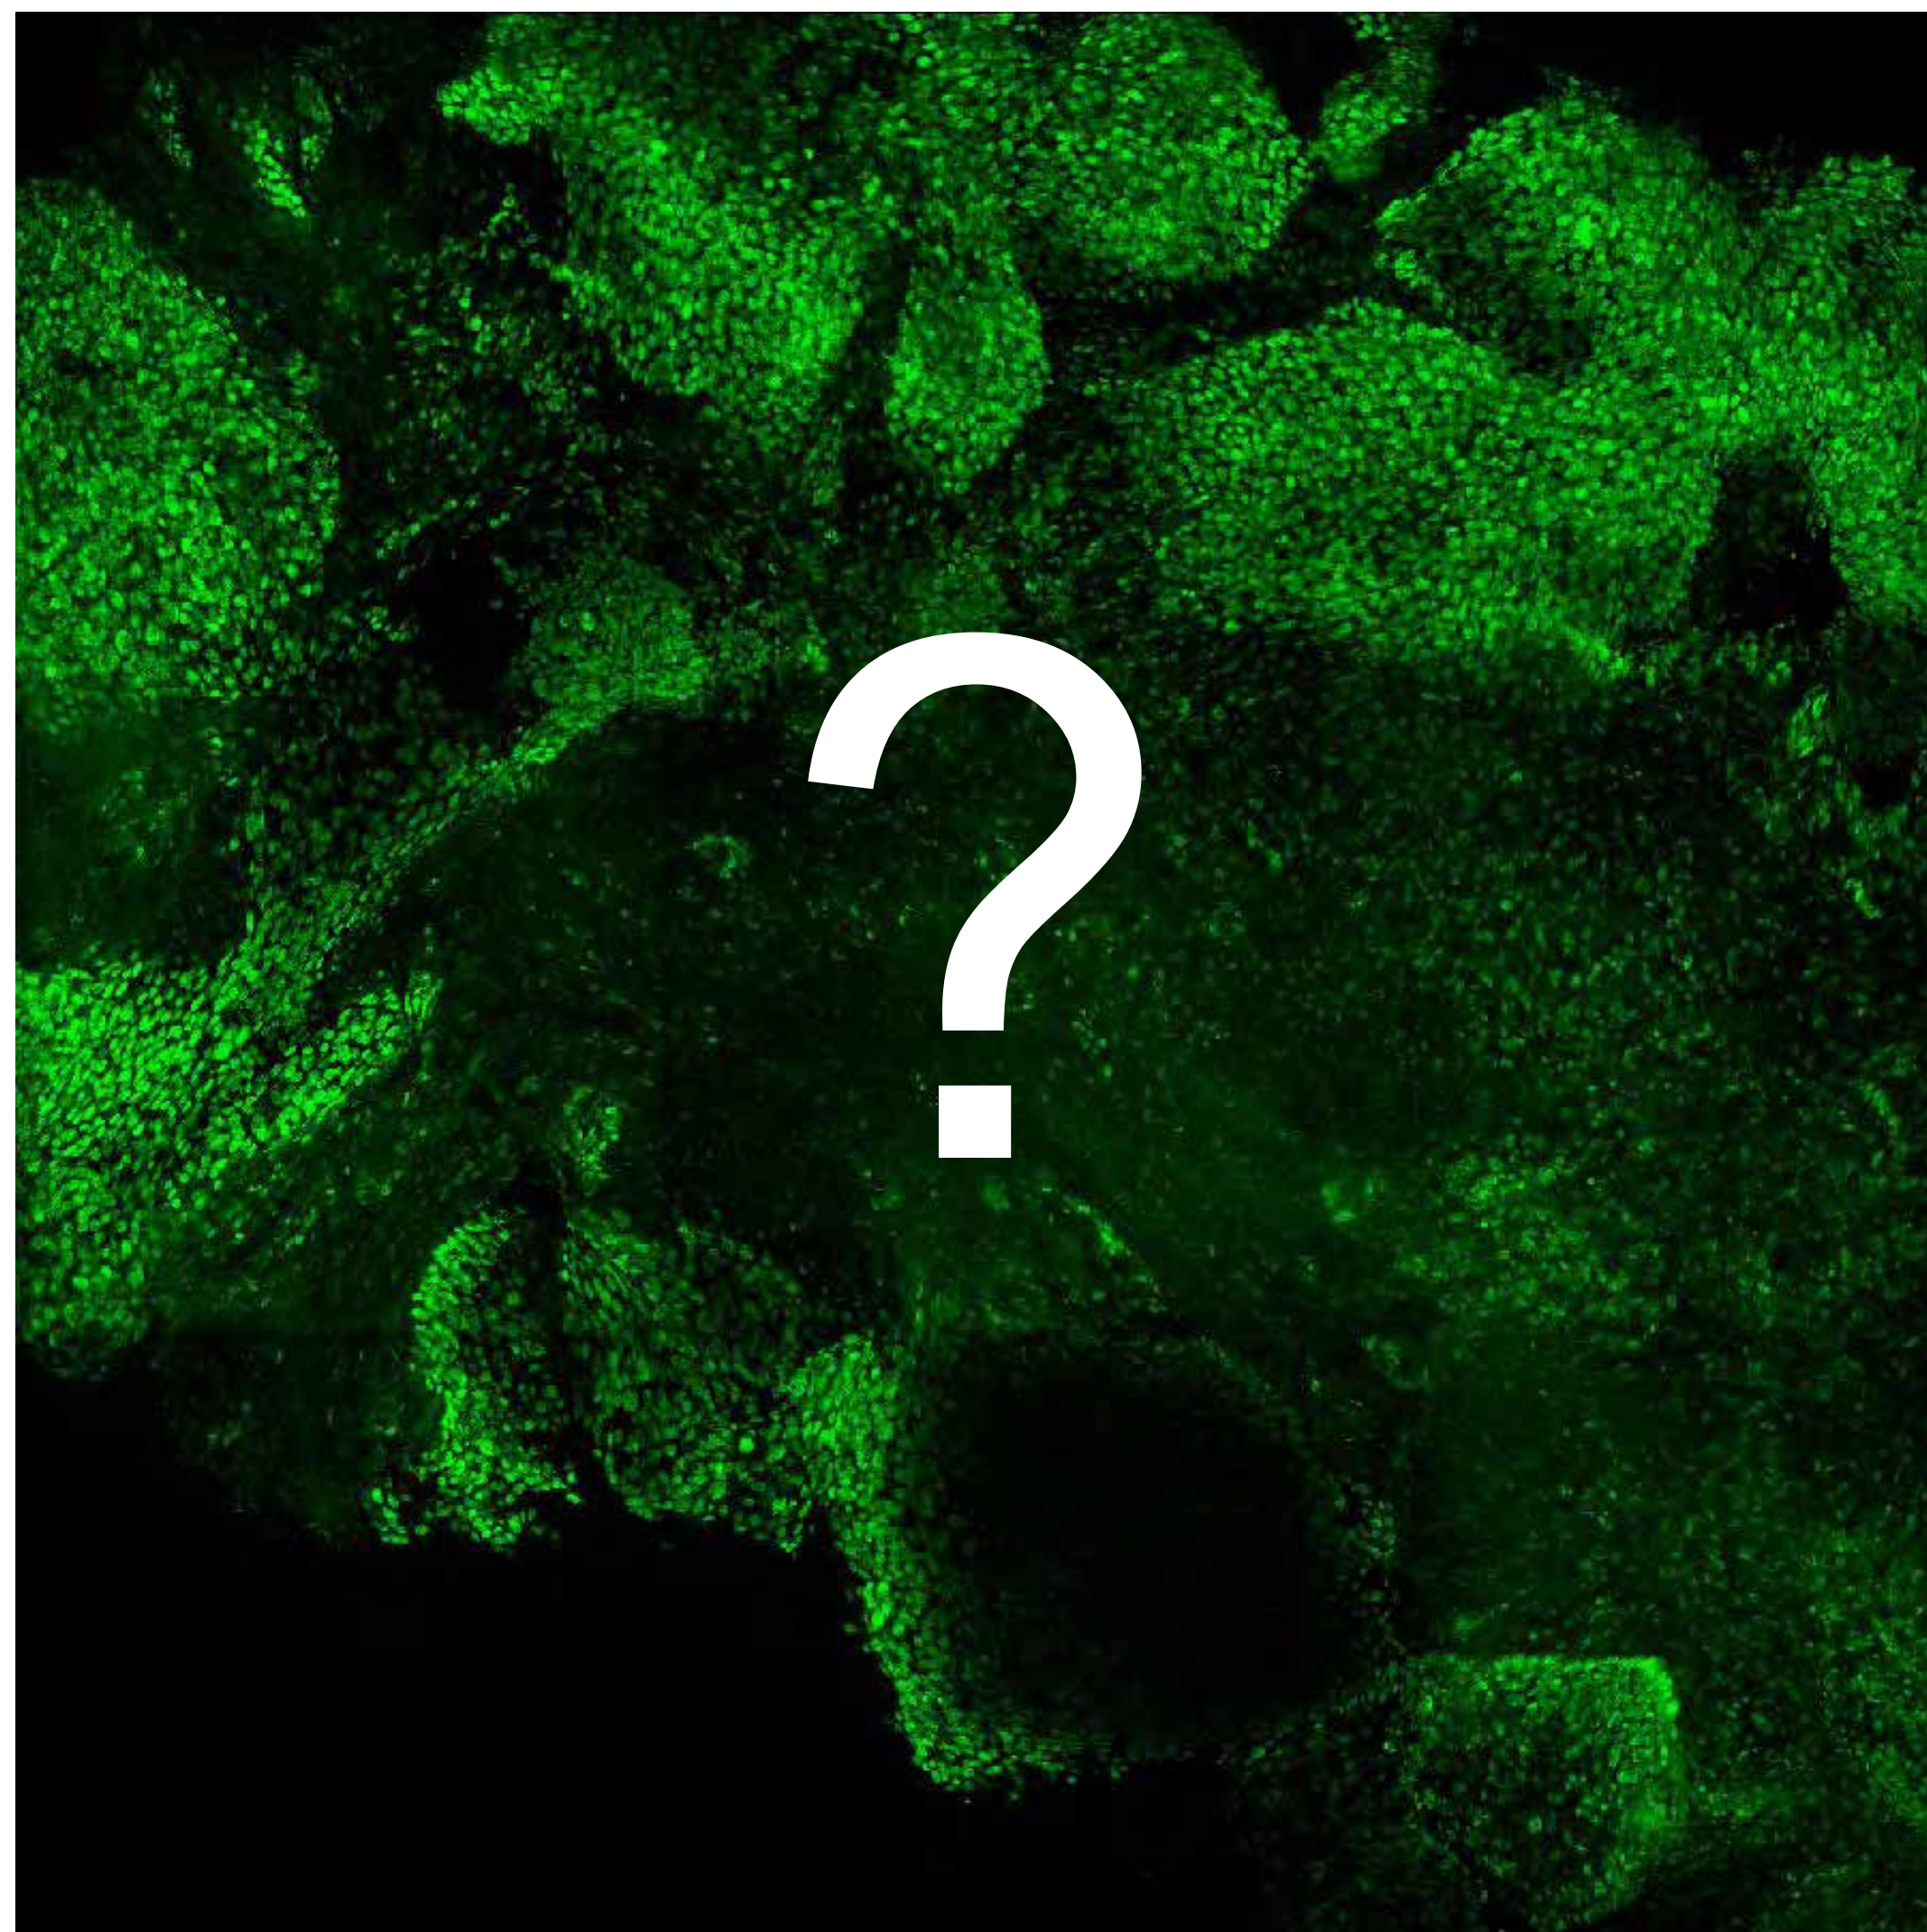

Tumor

Margin



1732

# Overview

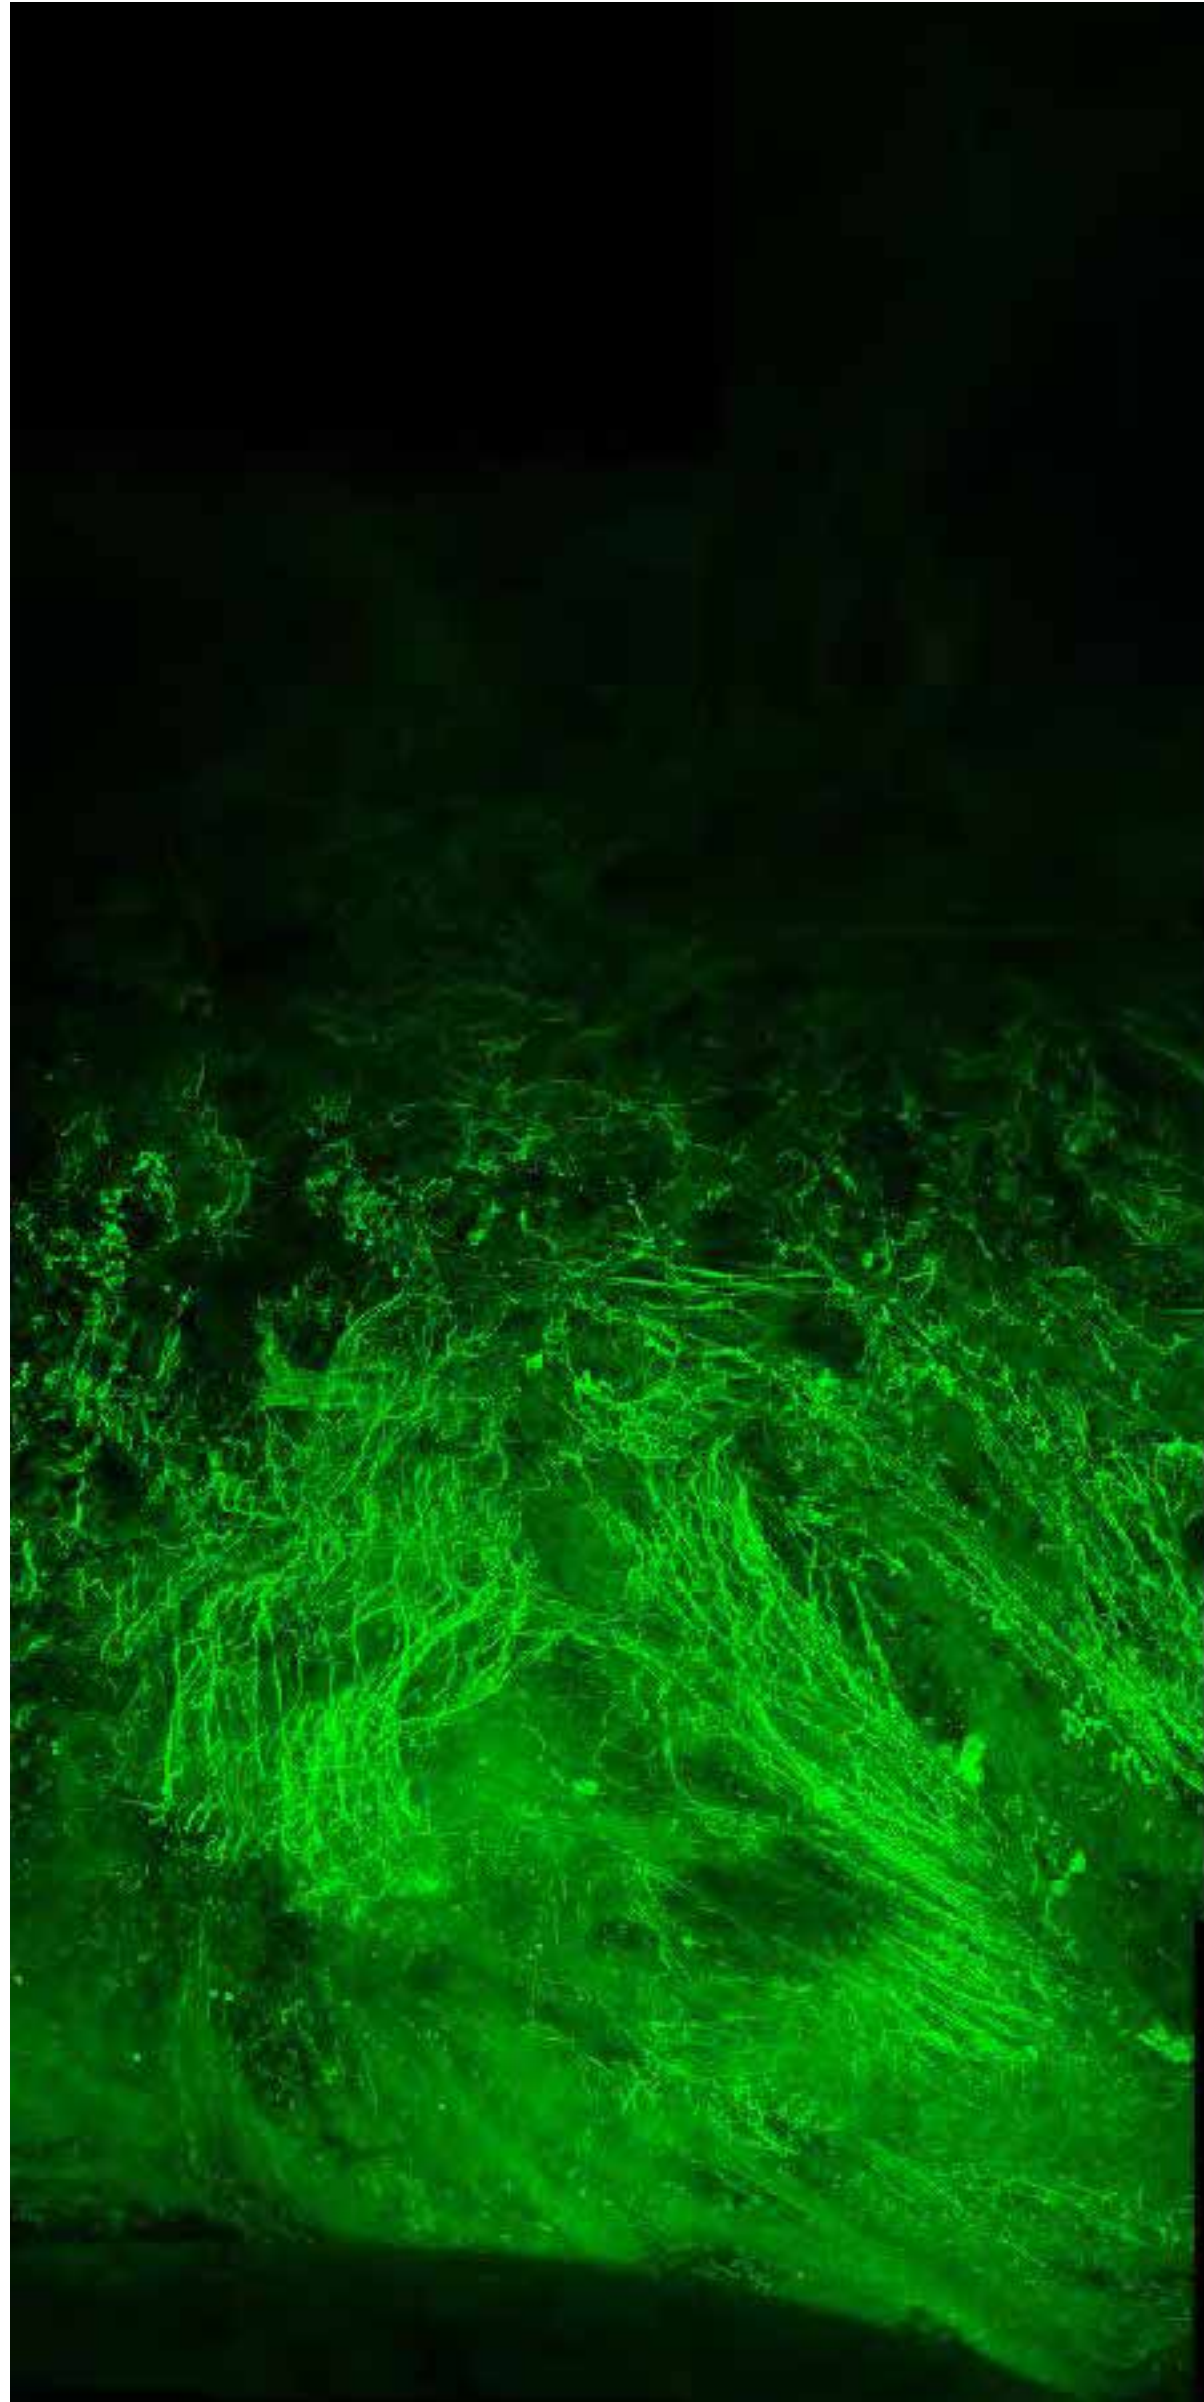

PARPi-FL only (green)

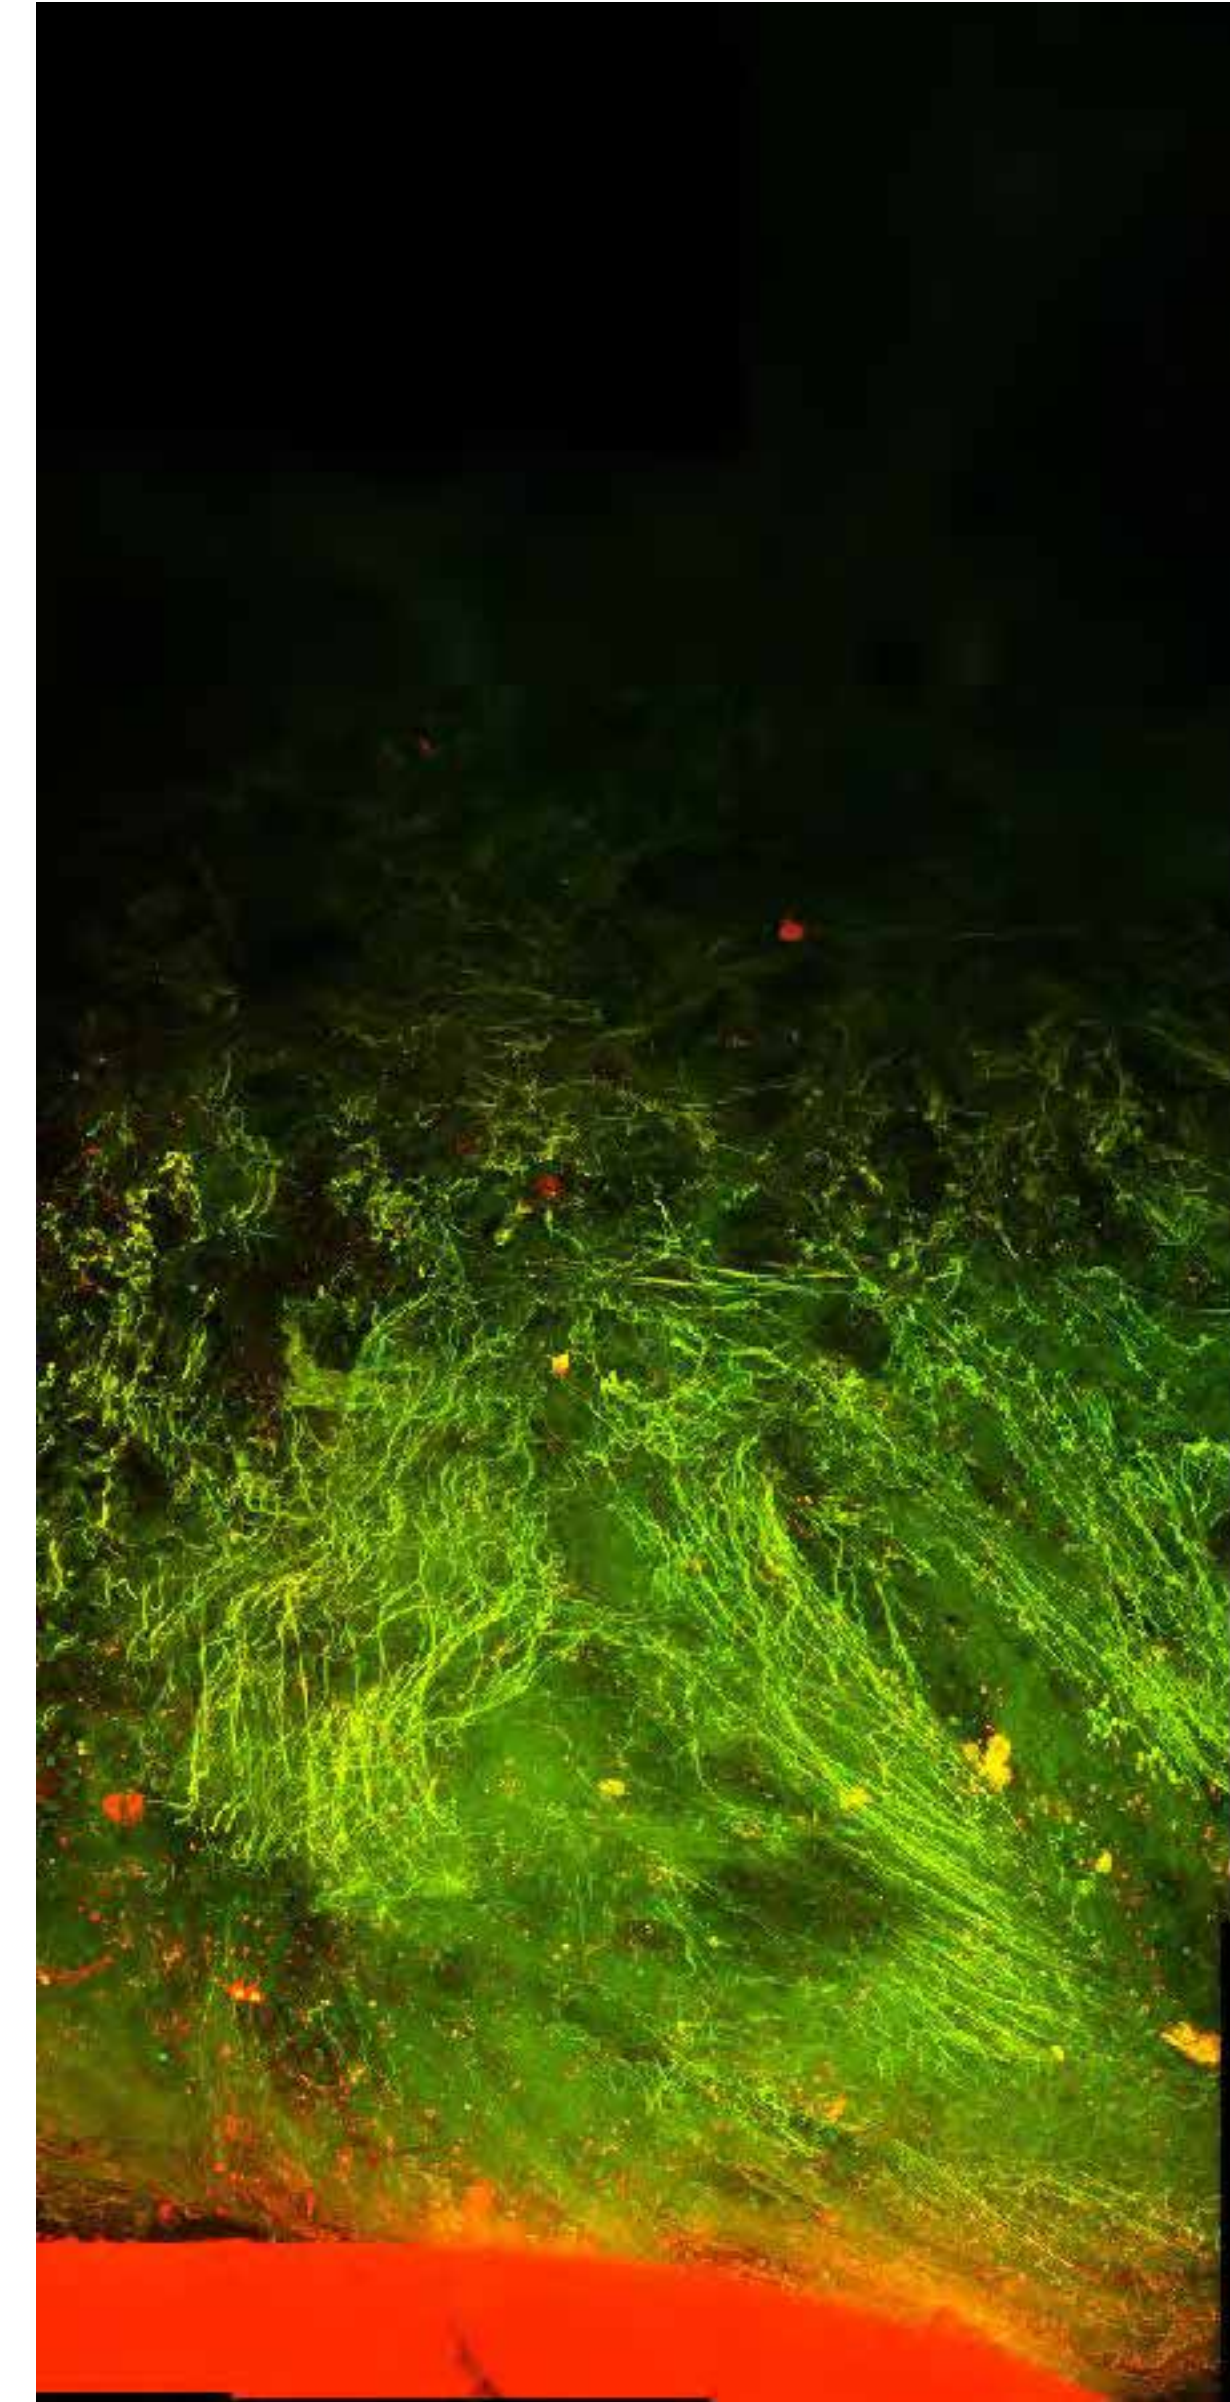

PARPi-FL (green) + Autofluorescence (red/yellow)



1732

Close-up

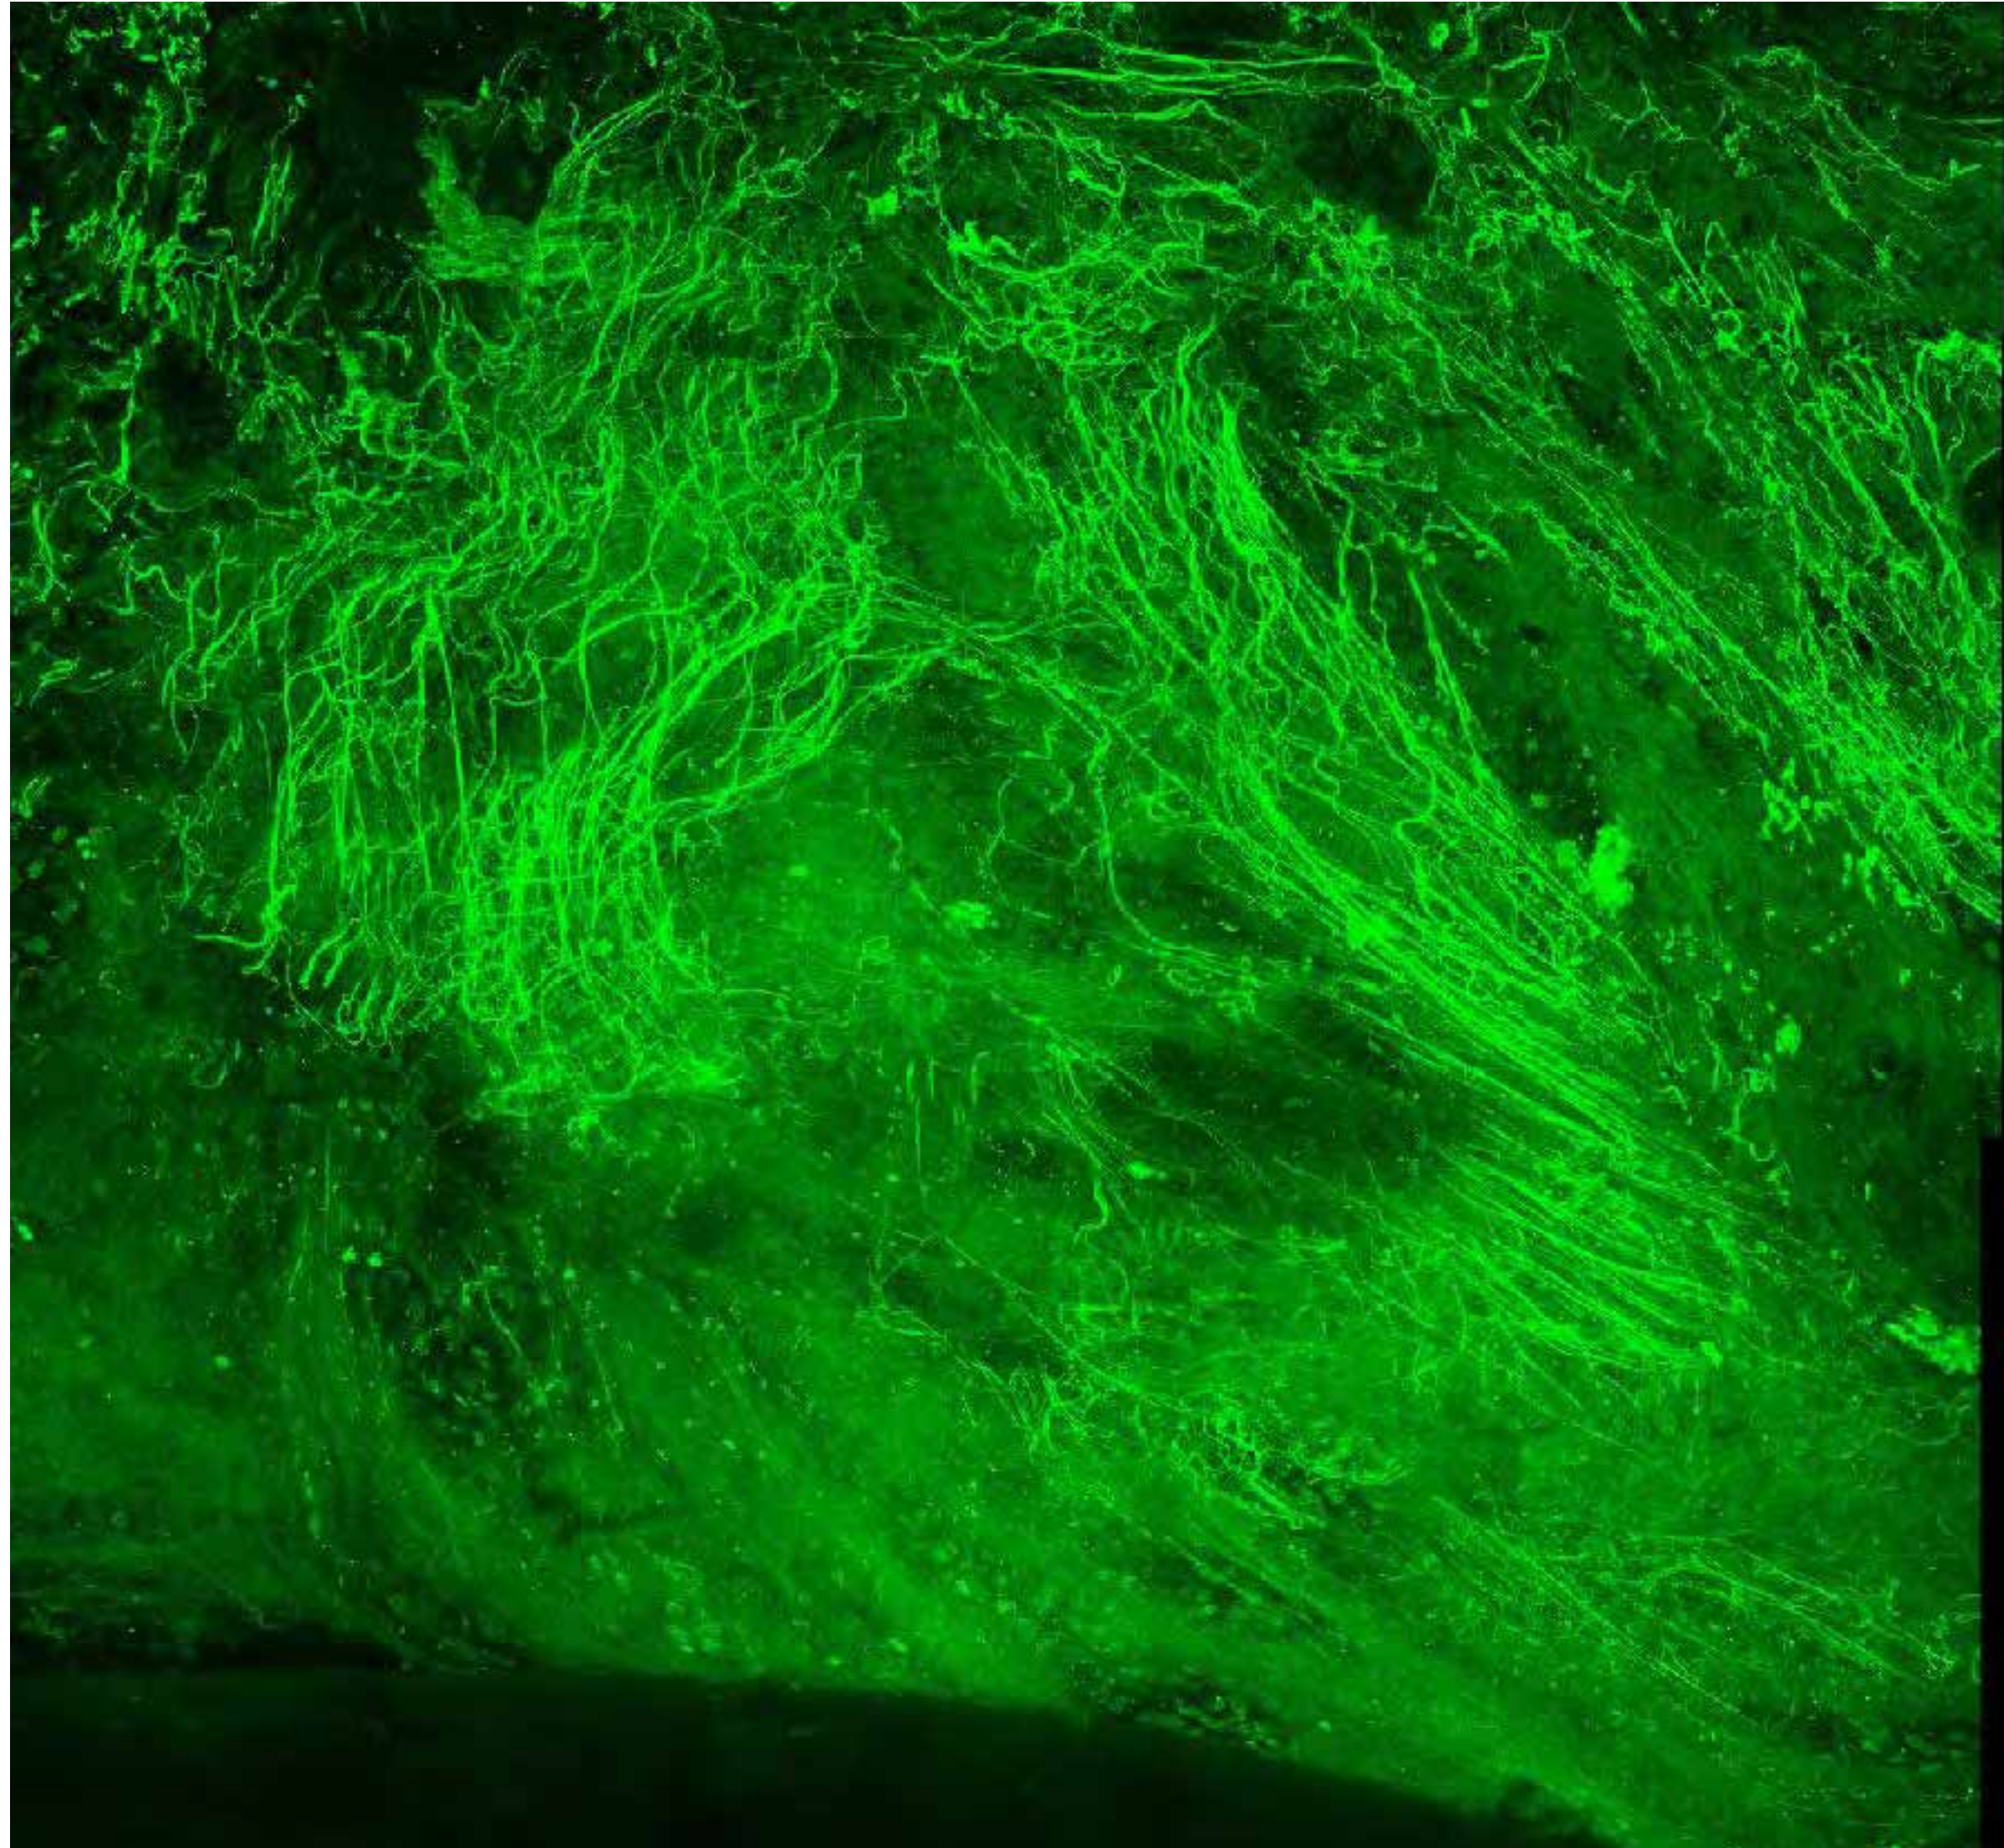

PARPi-FL only (green)

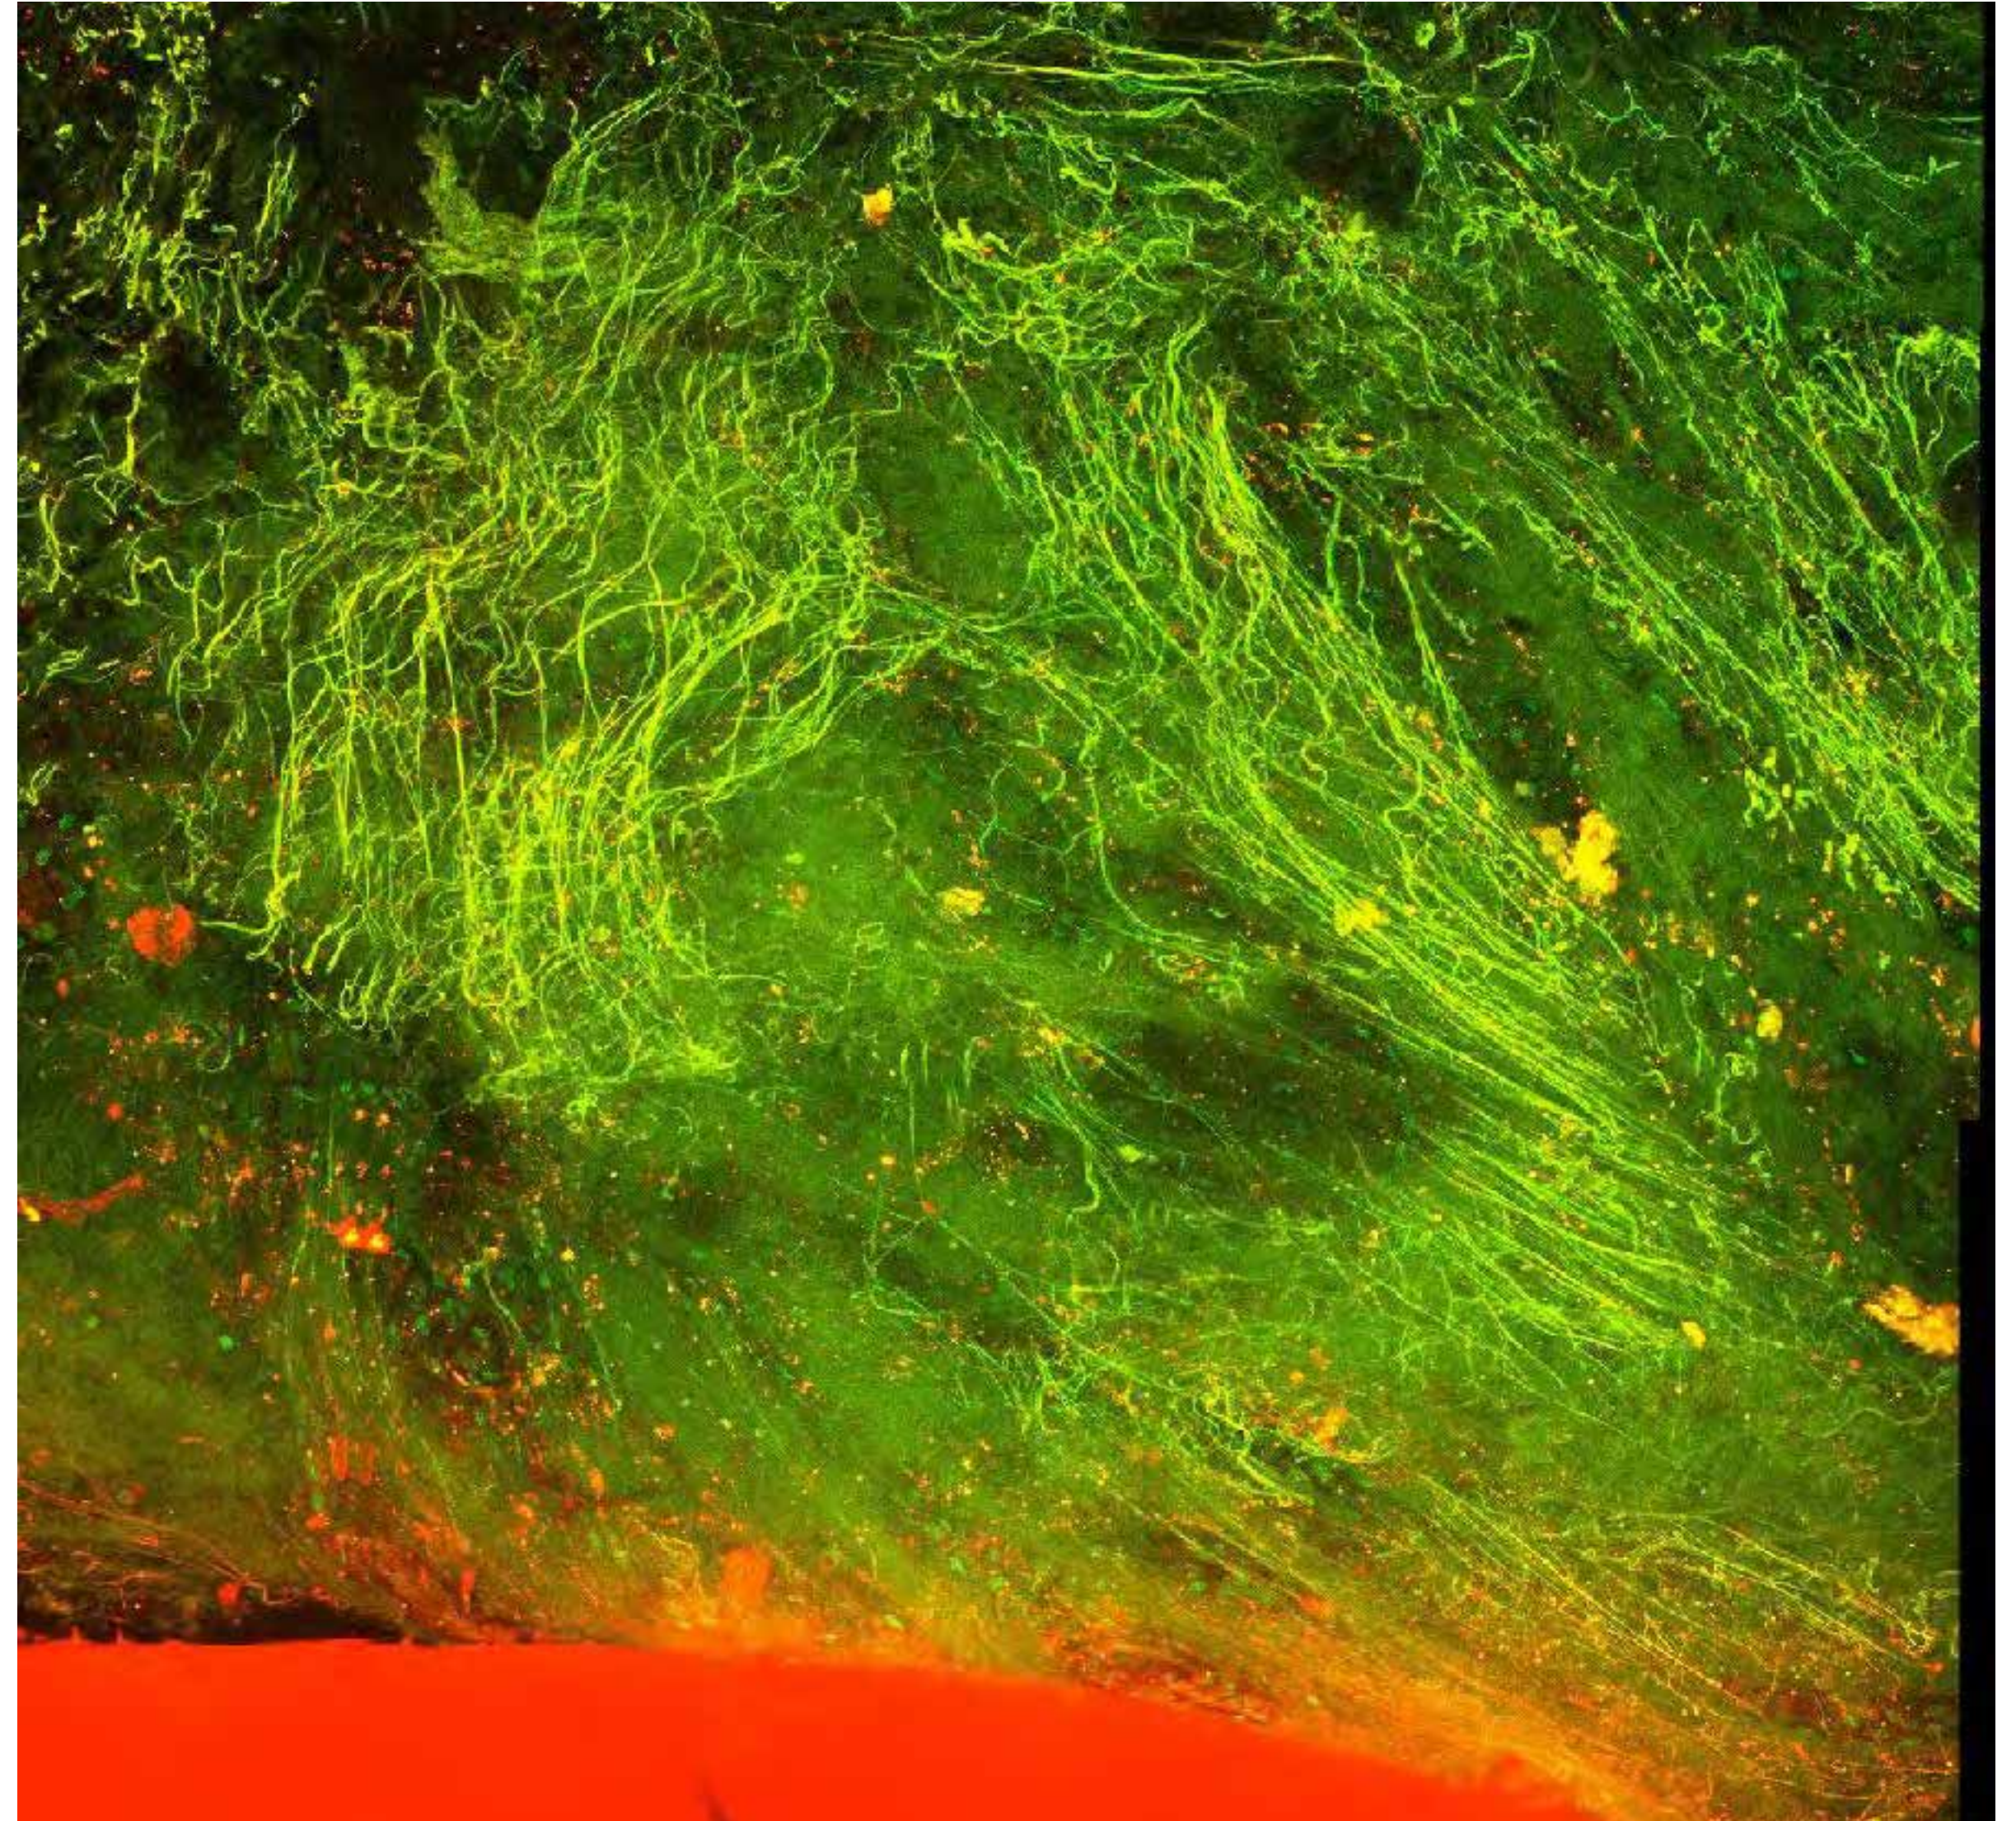

PARPi-FL (green) + Autofluorescence (red/yellow)



1732

10

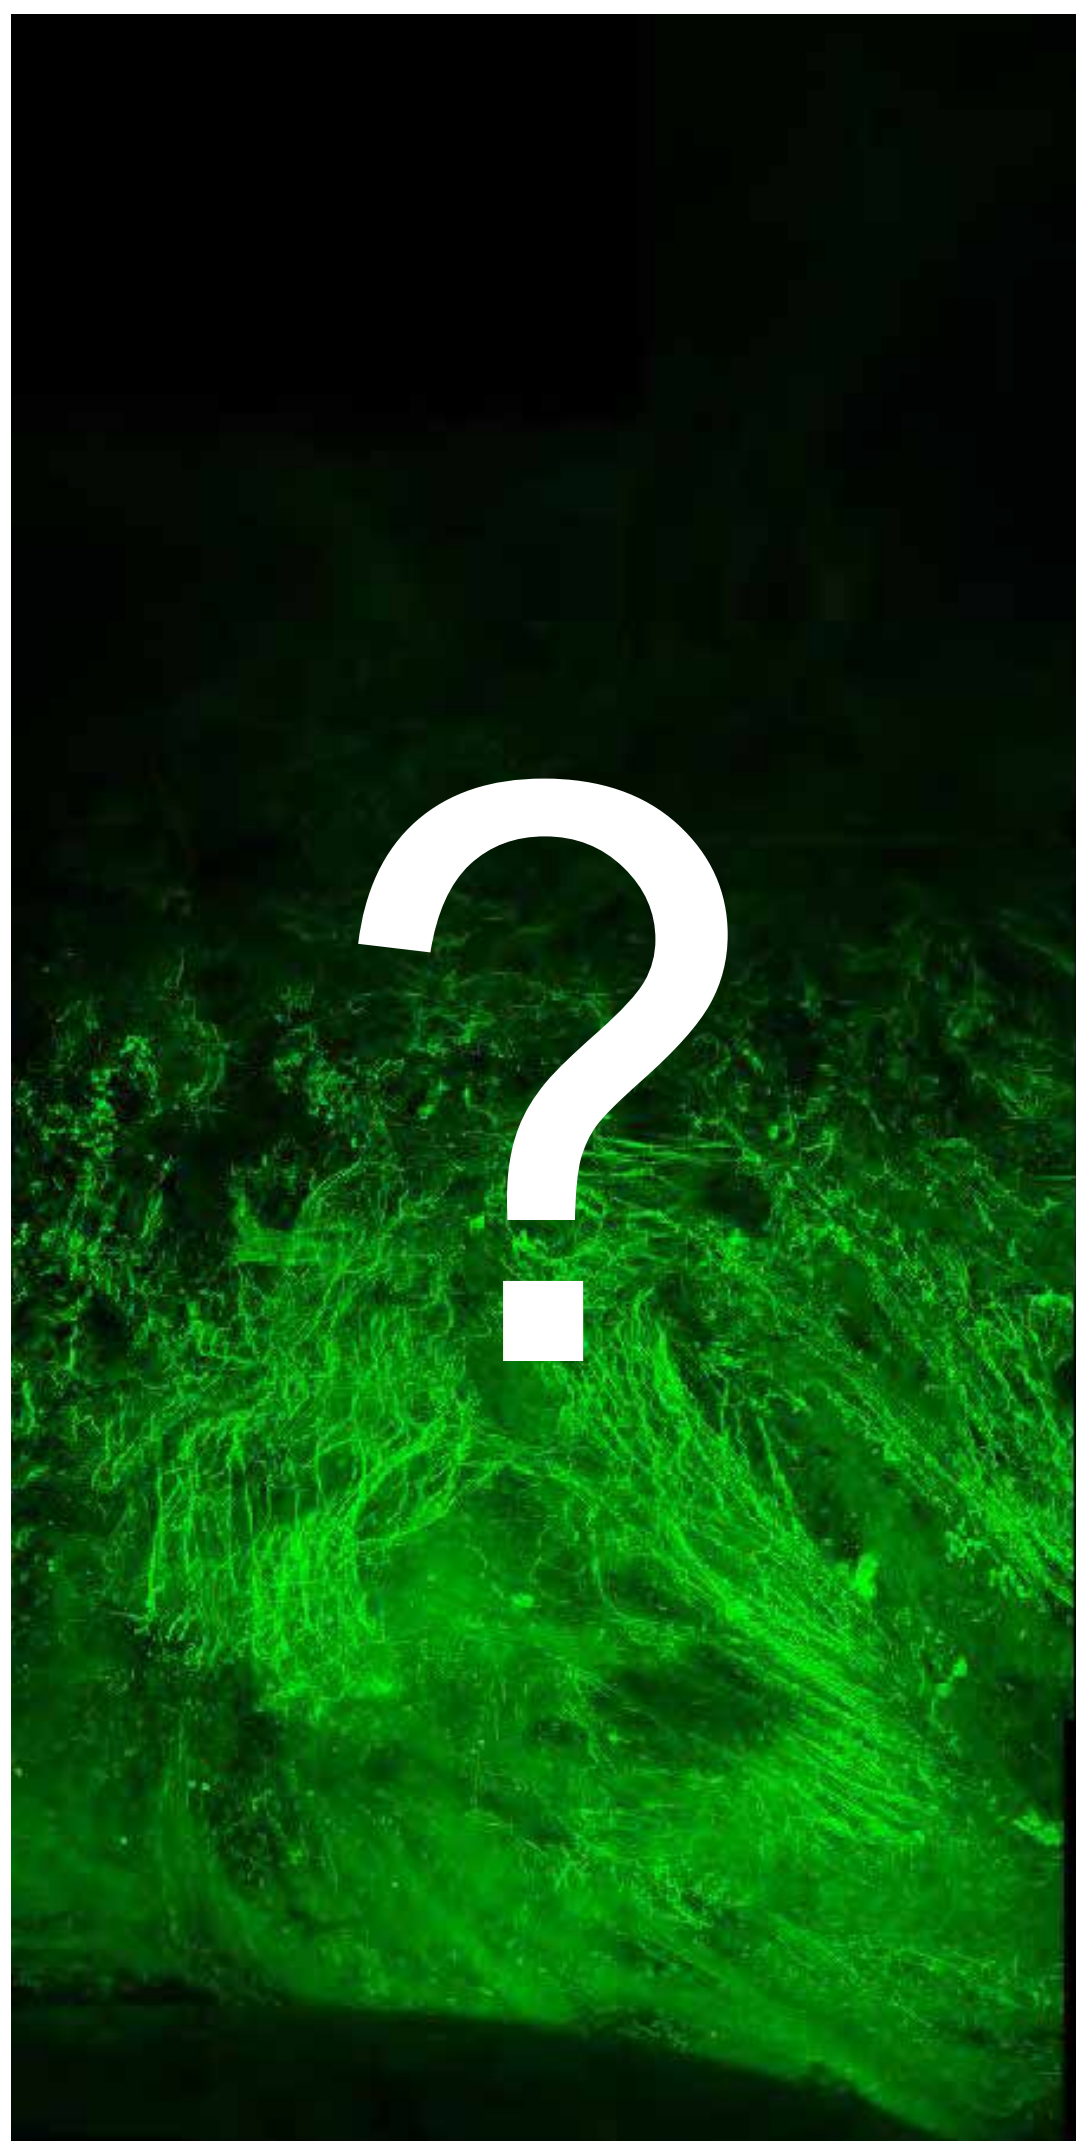

Tumor

Margin



2154

# Overview

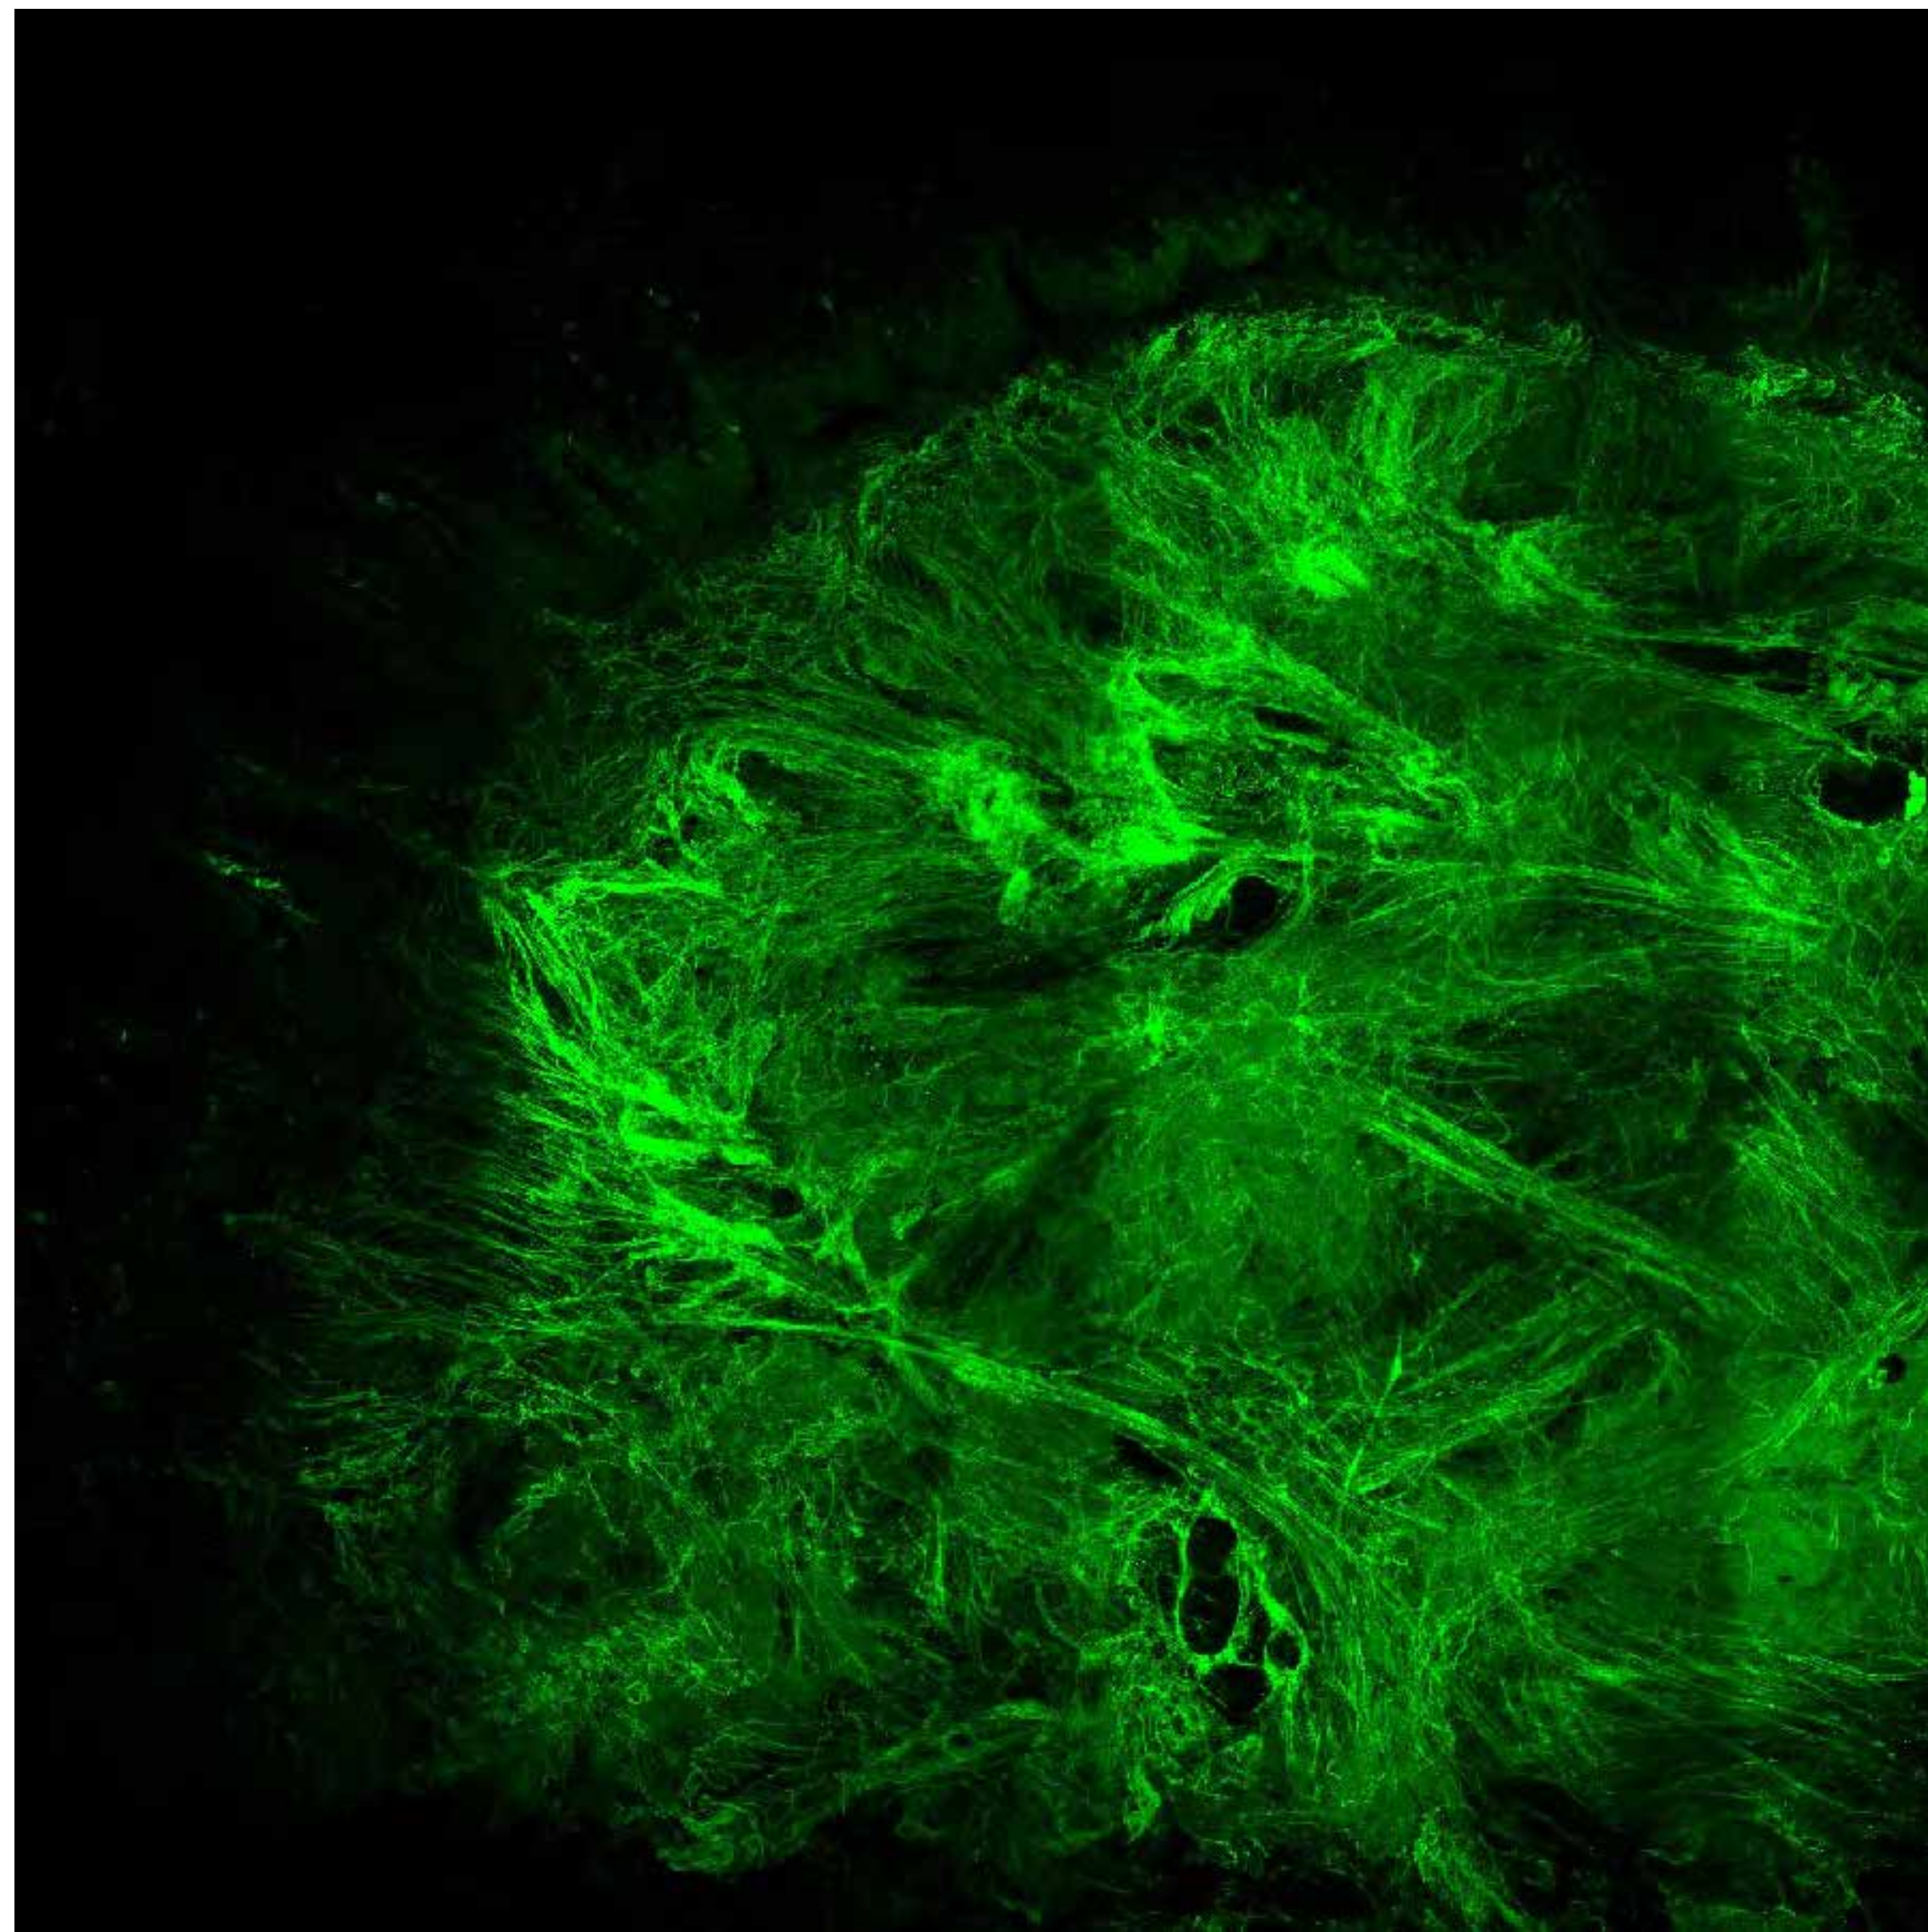

PARPi-FL only (green)

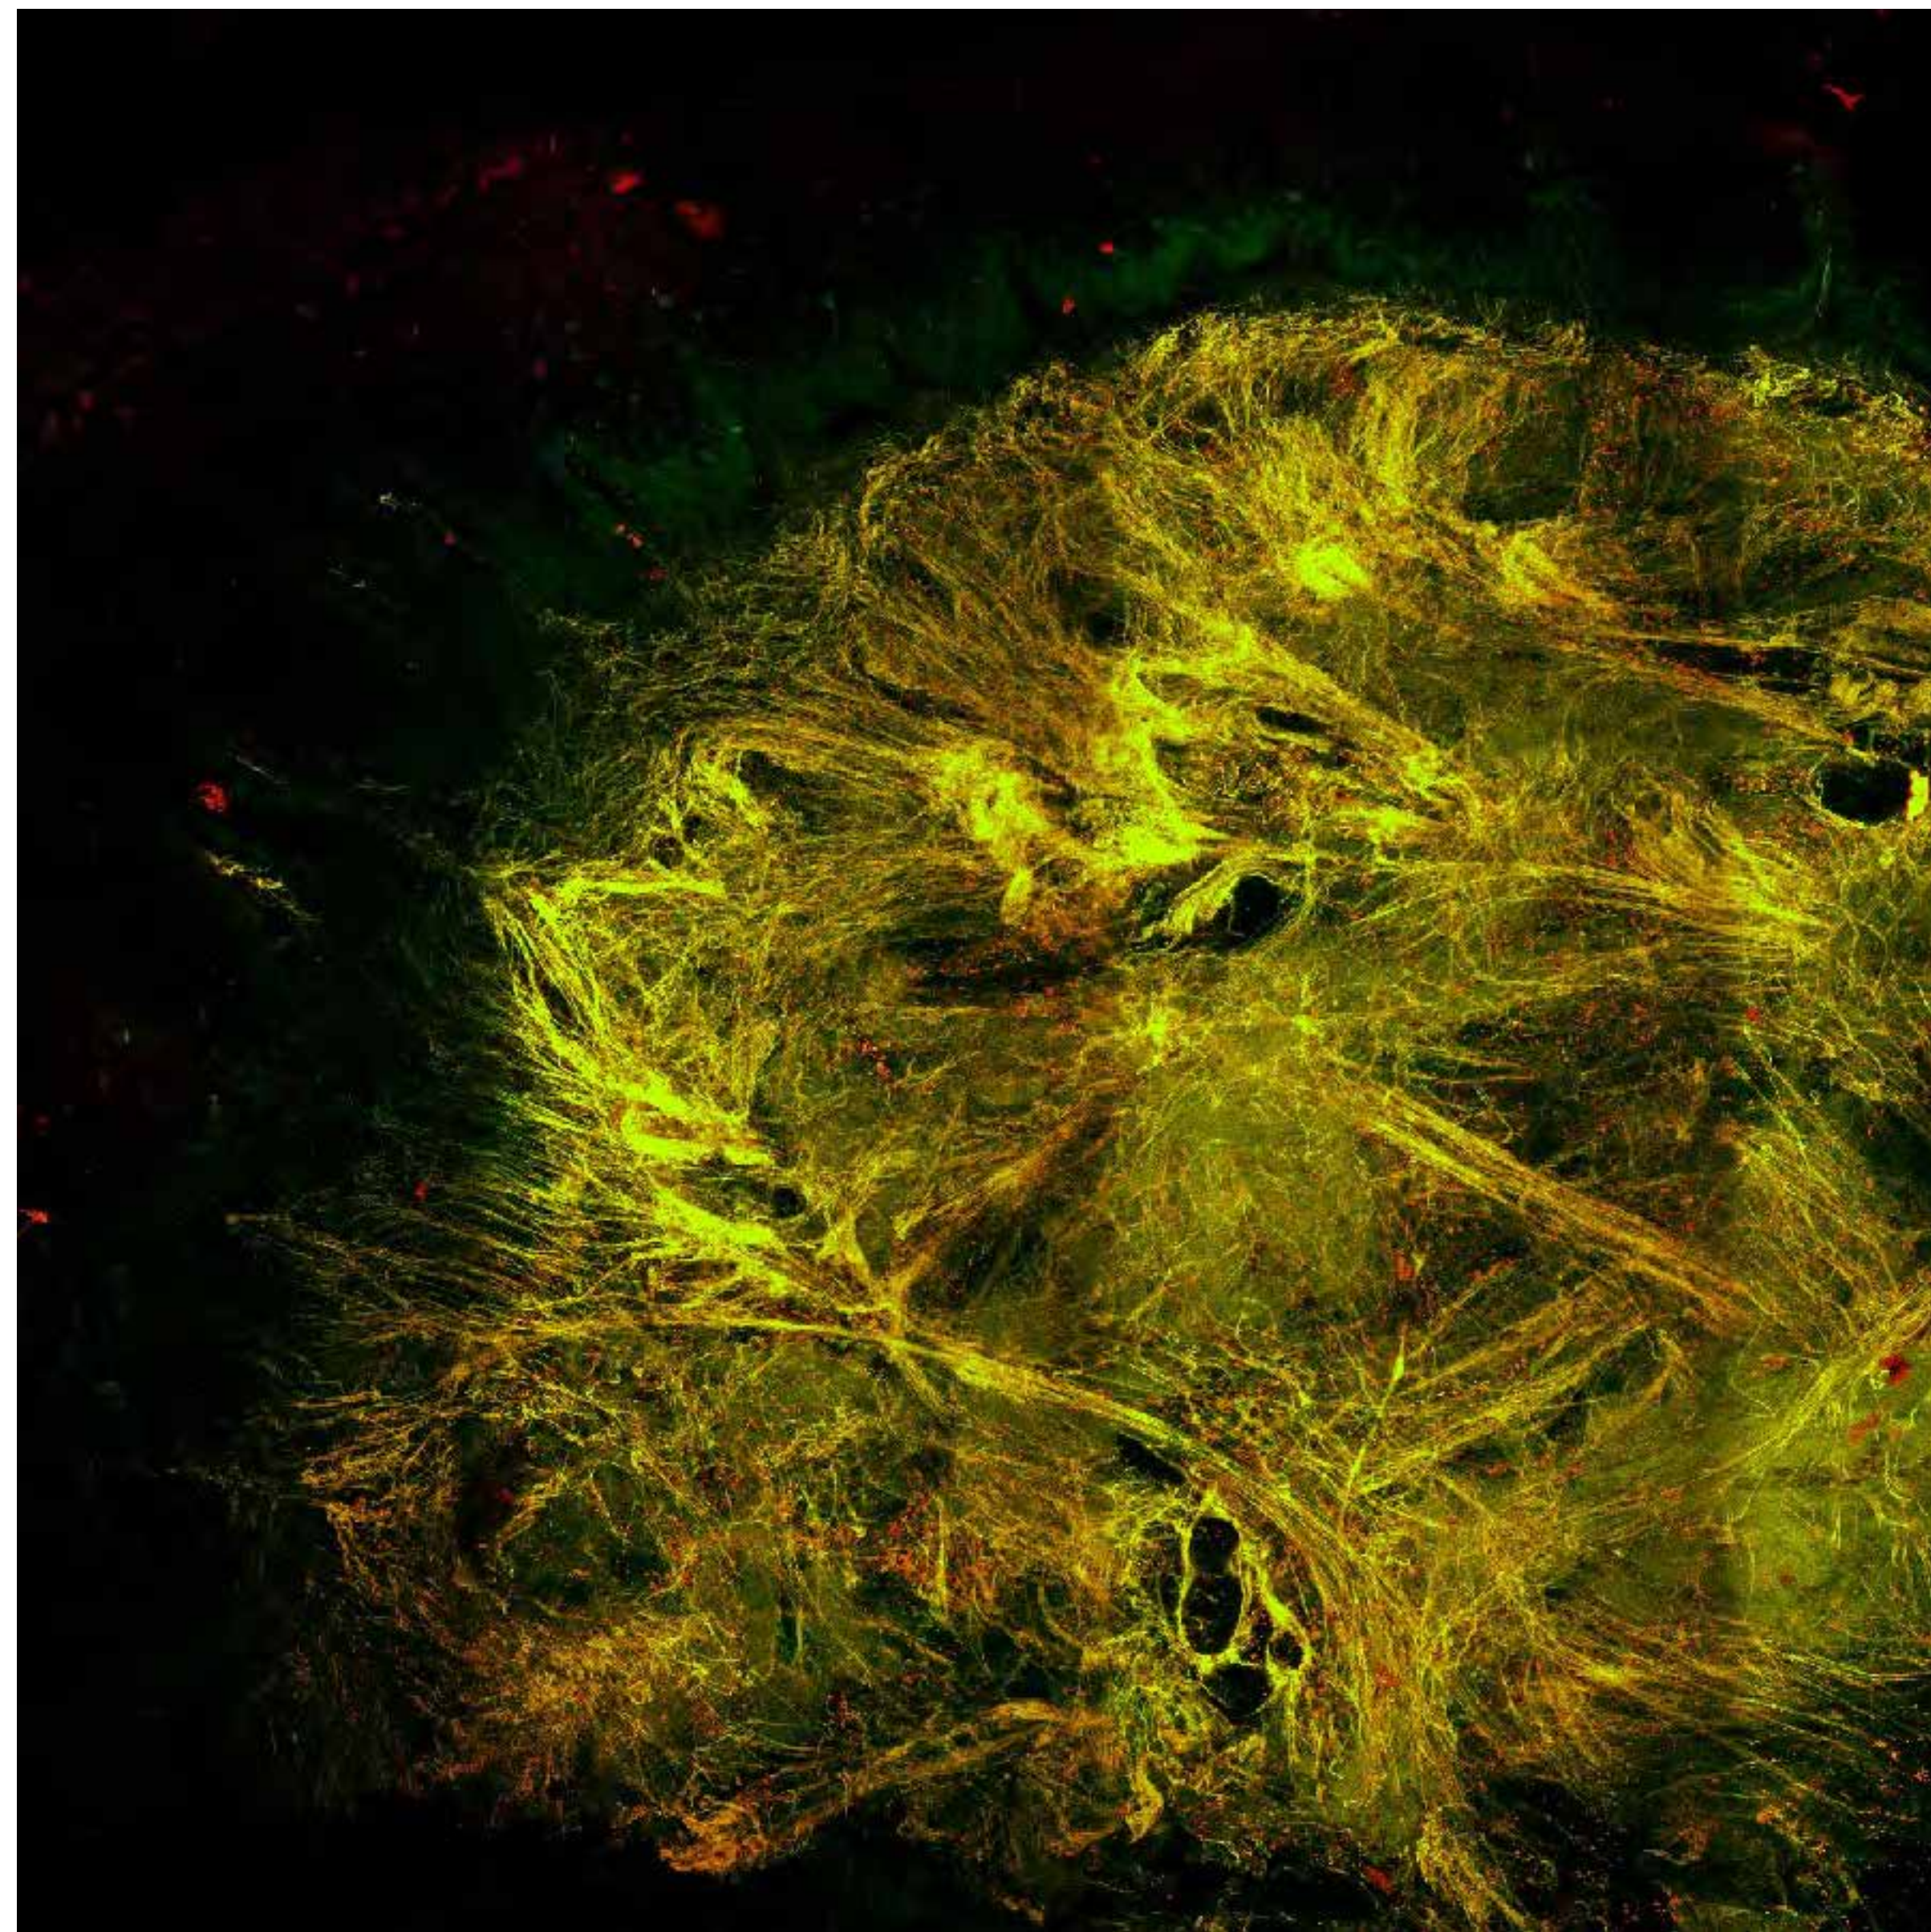

PARPi-FL (green) + Autofluorescence (red/yellow)



2154

Close-up

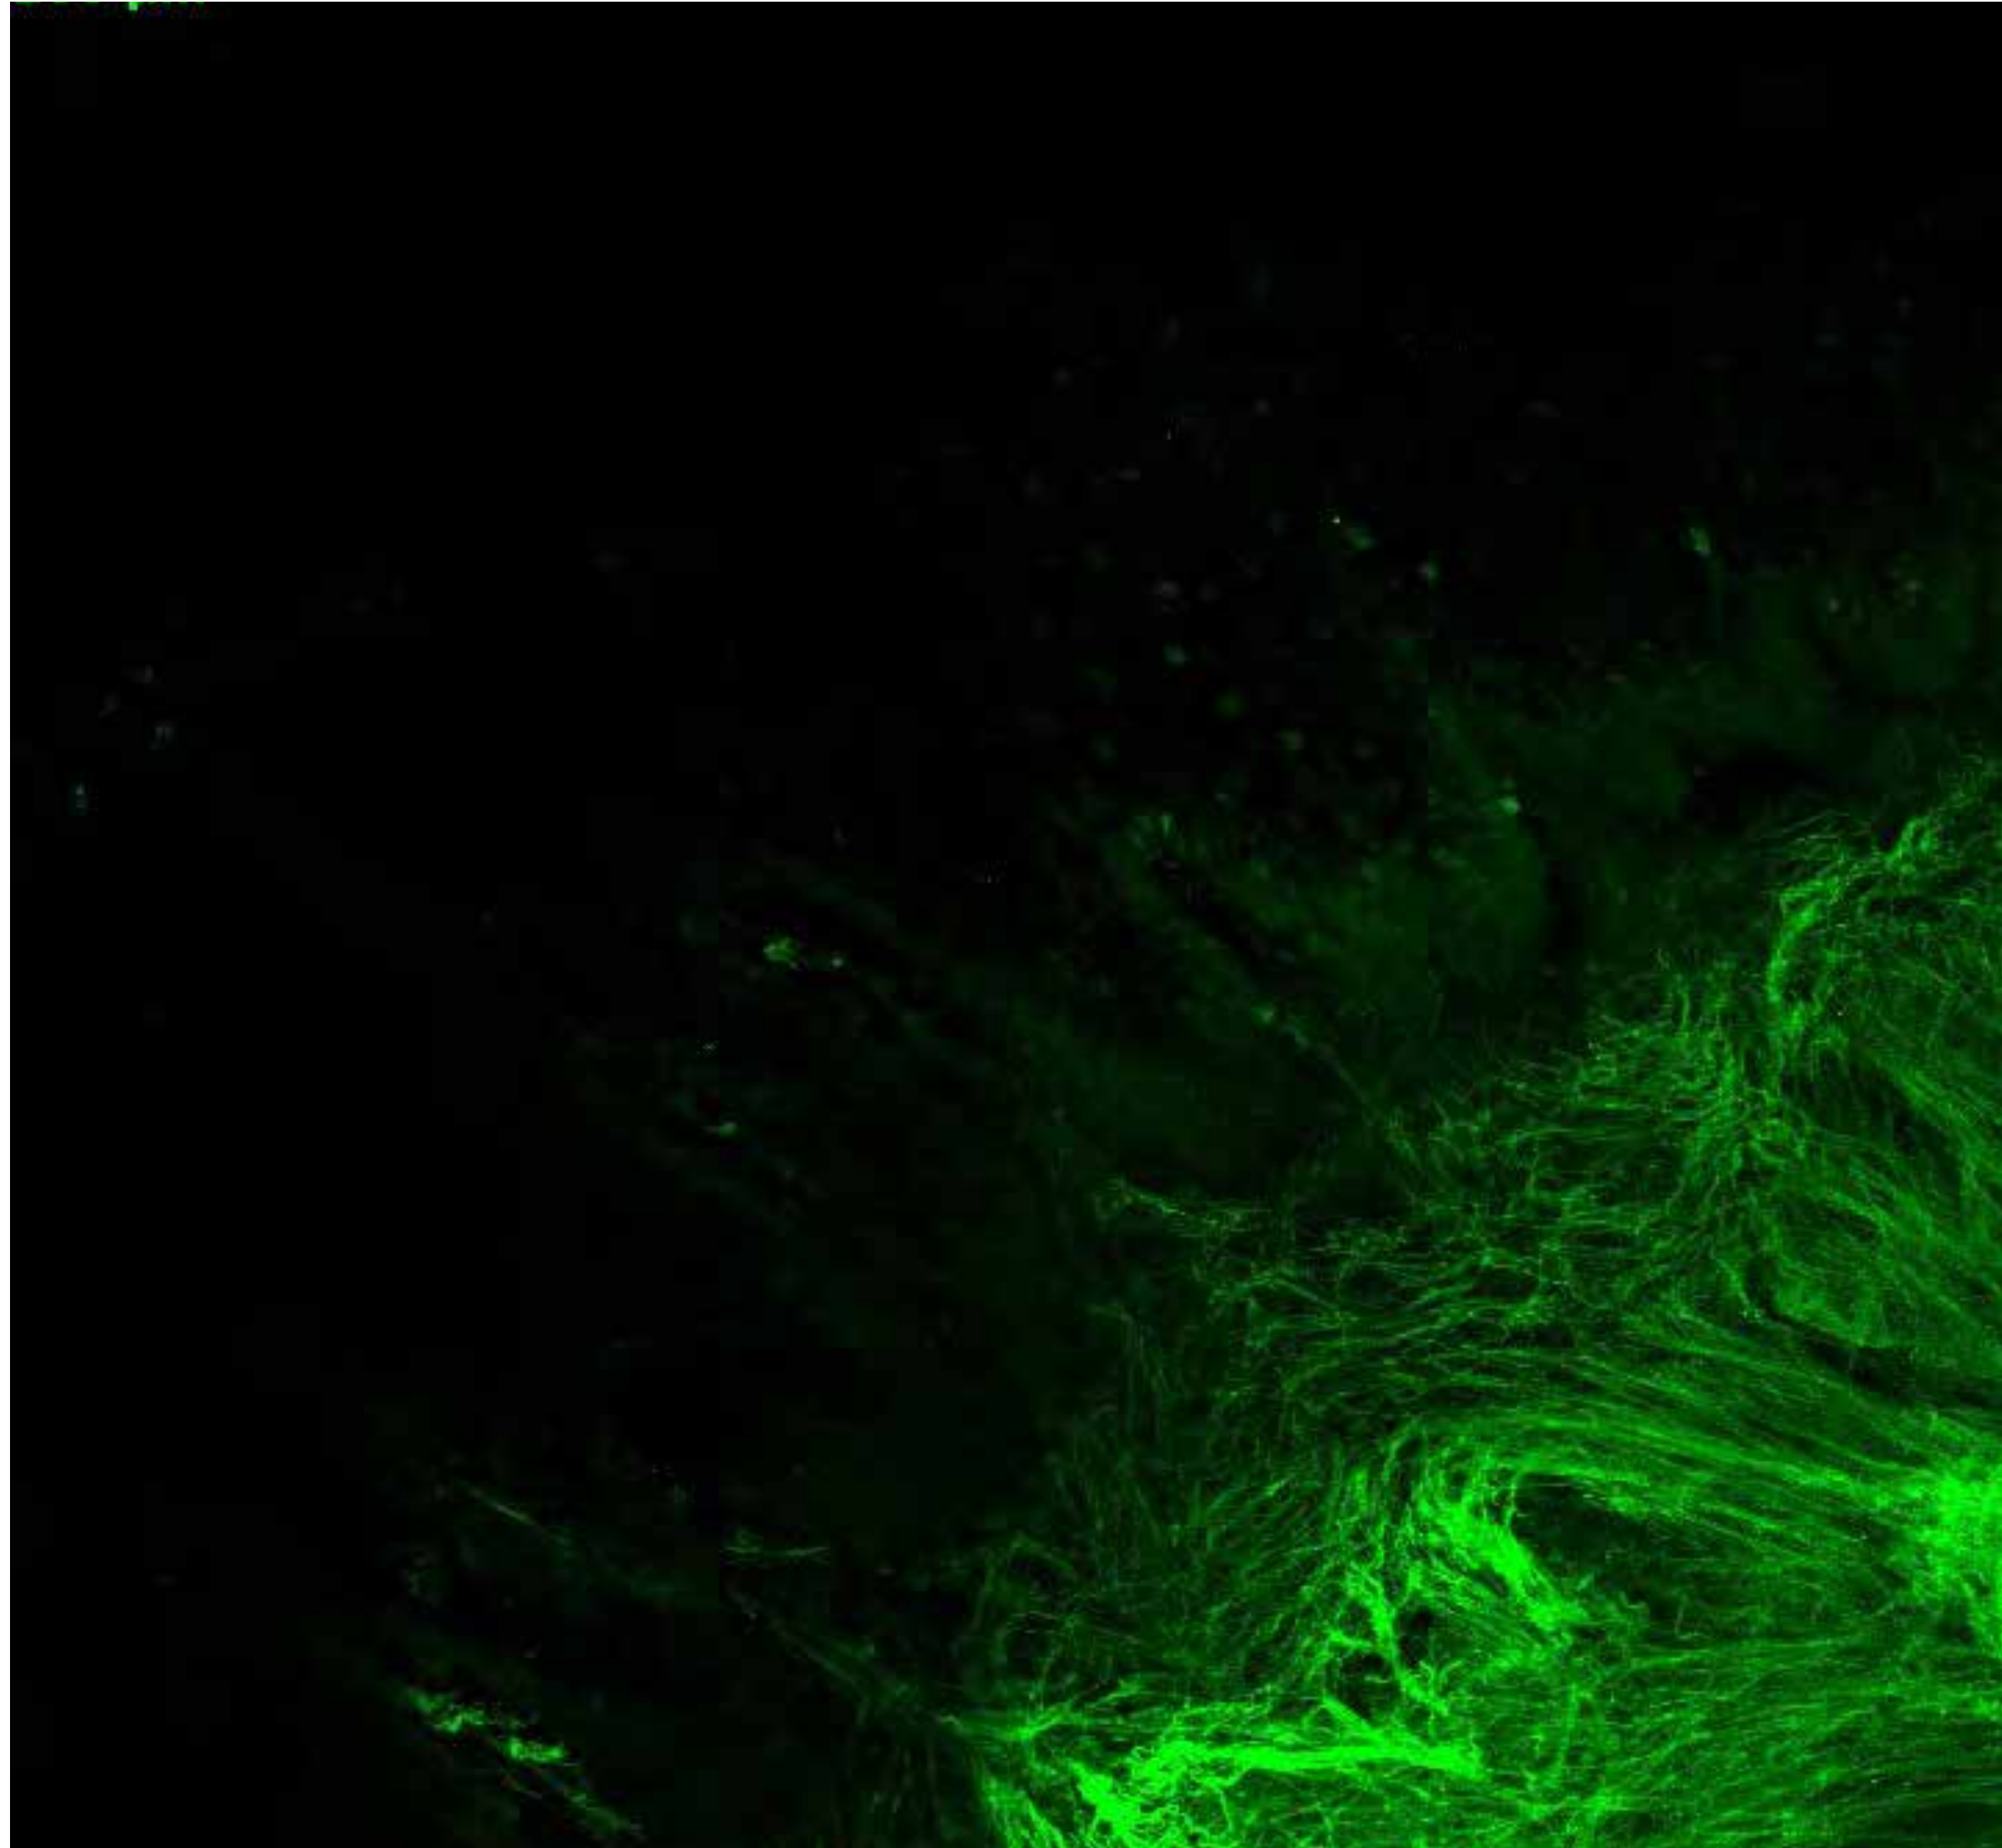

PARPi-FL only (green)

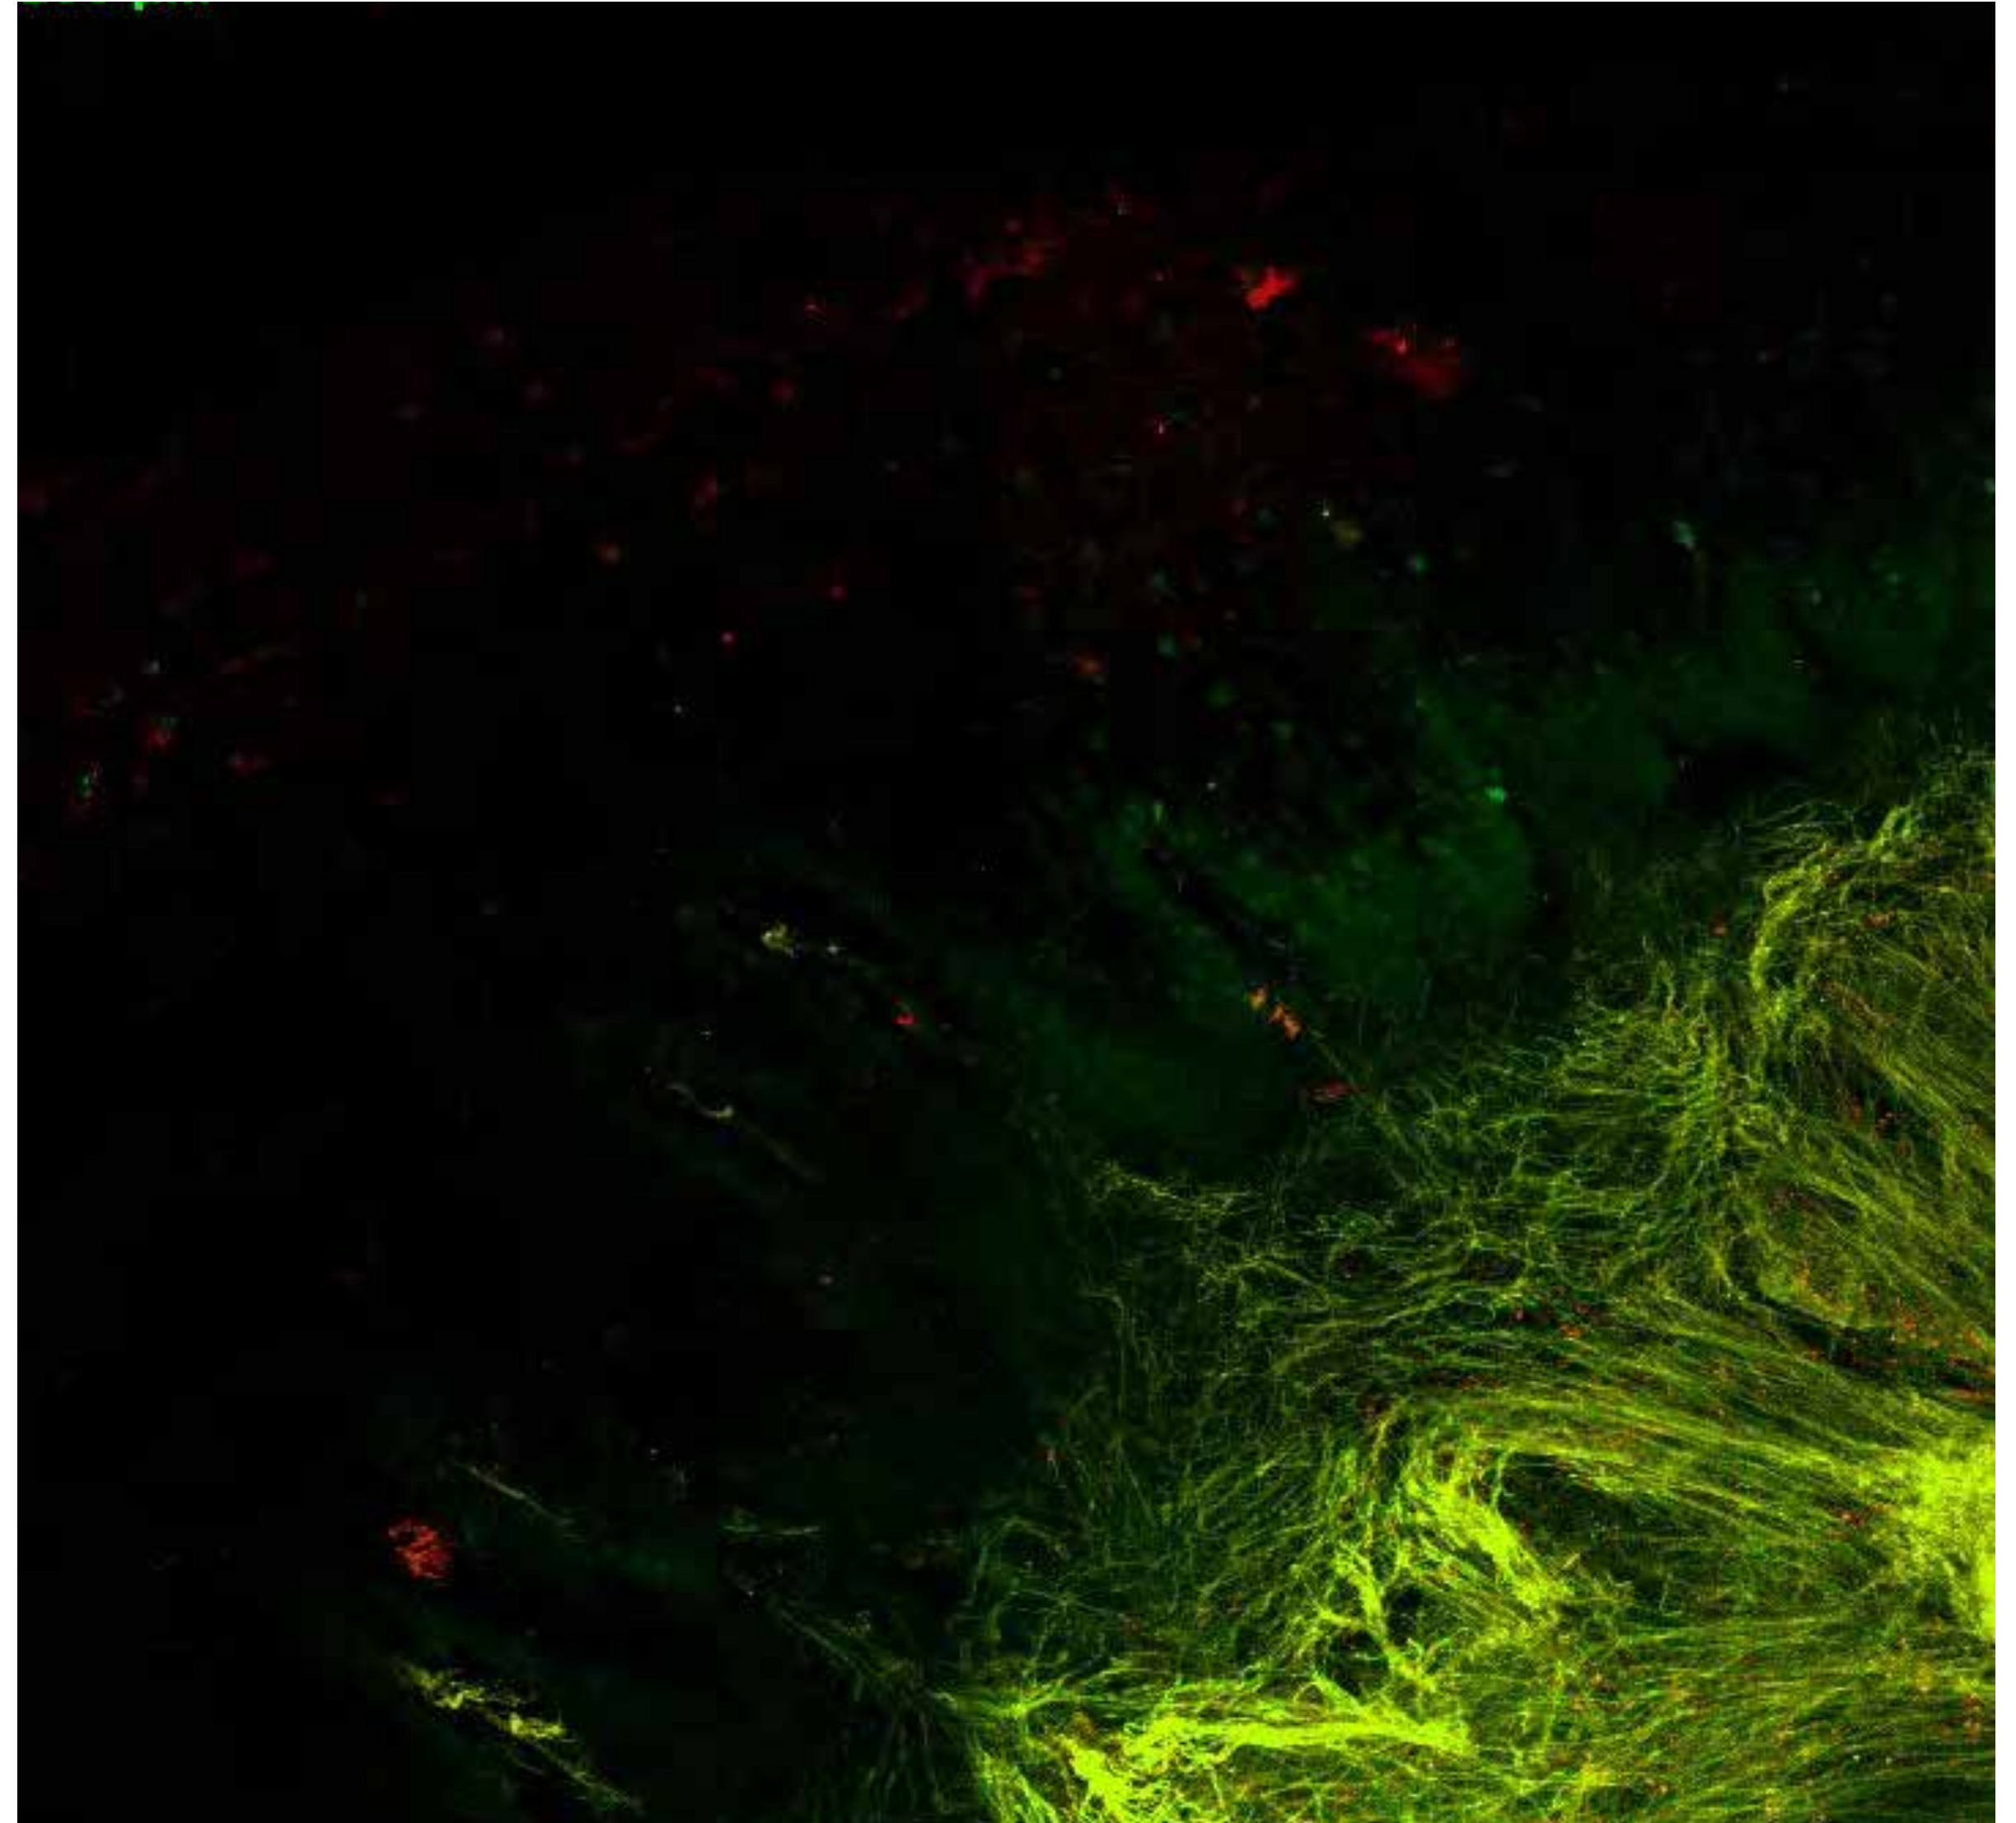

PARPi-FL (green) + Autofluorescence (red/yellow)



2154

Close-up

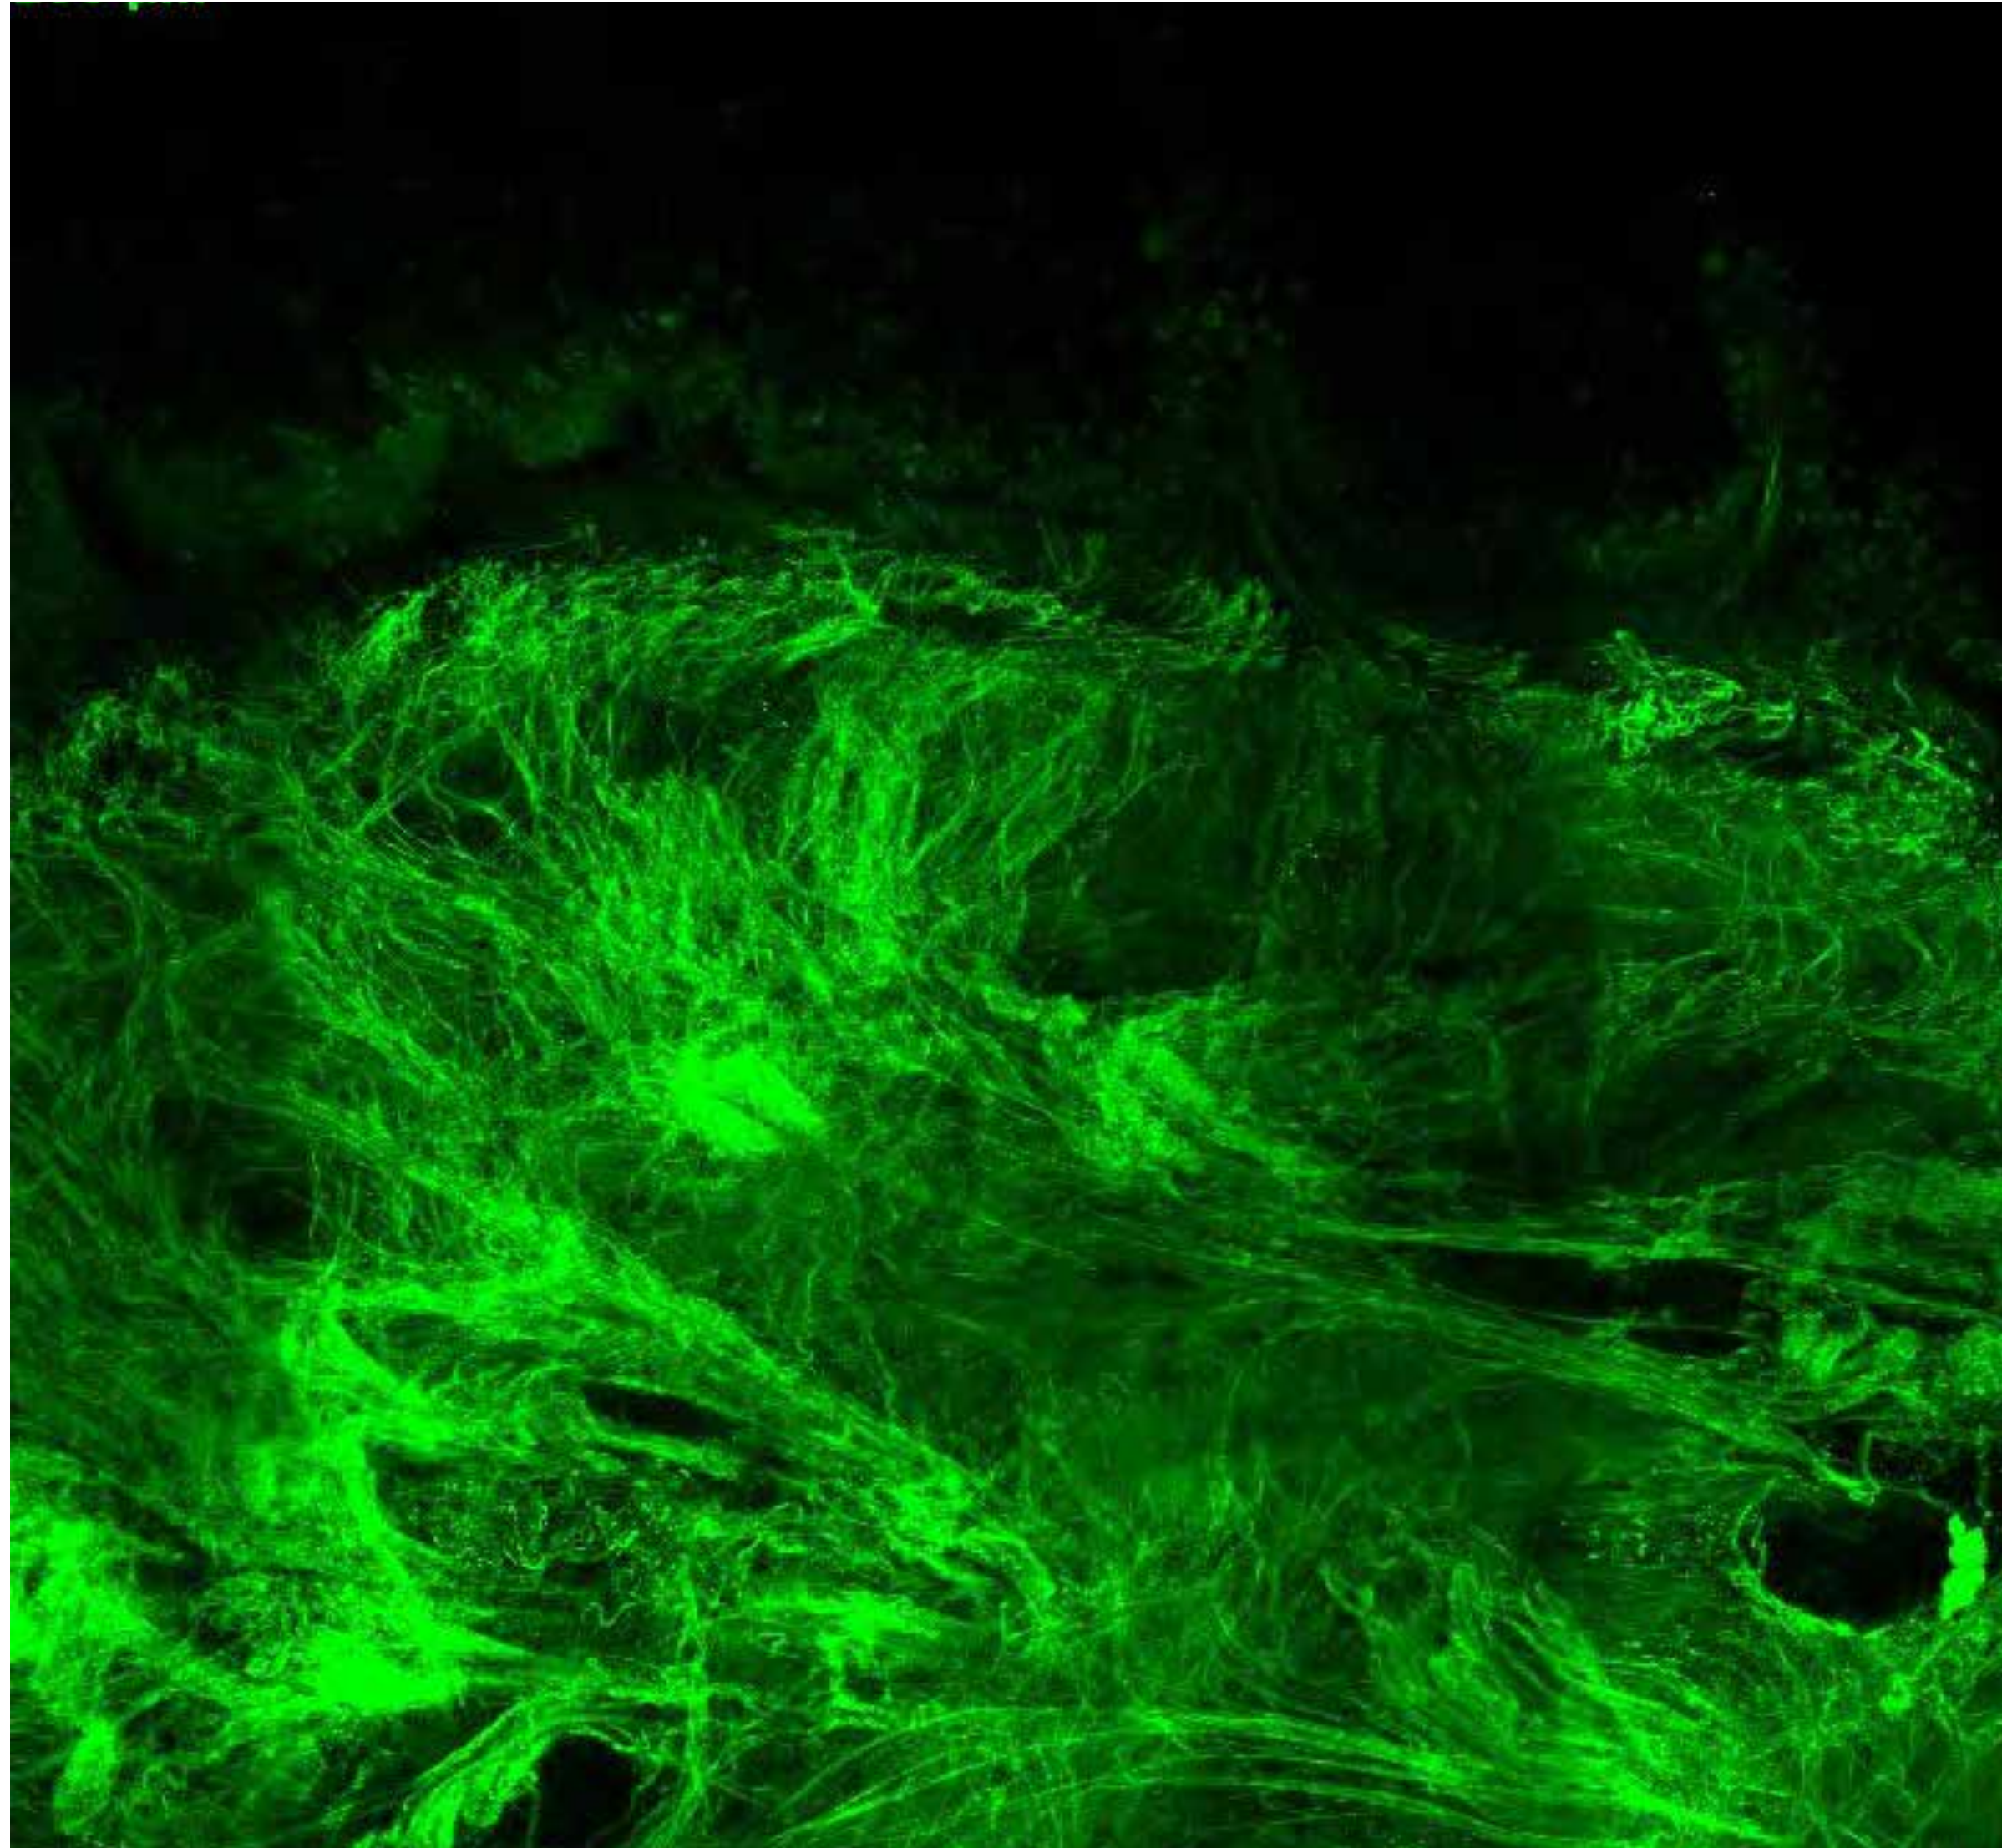

PARPi-FL only (green)

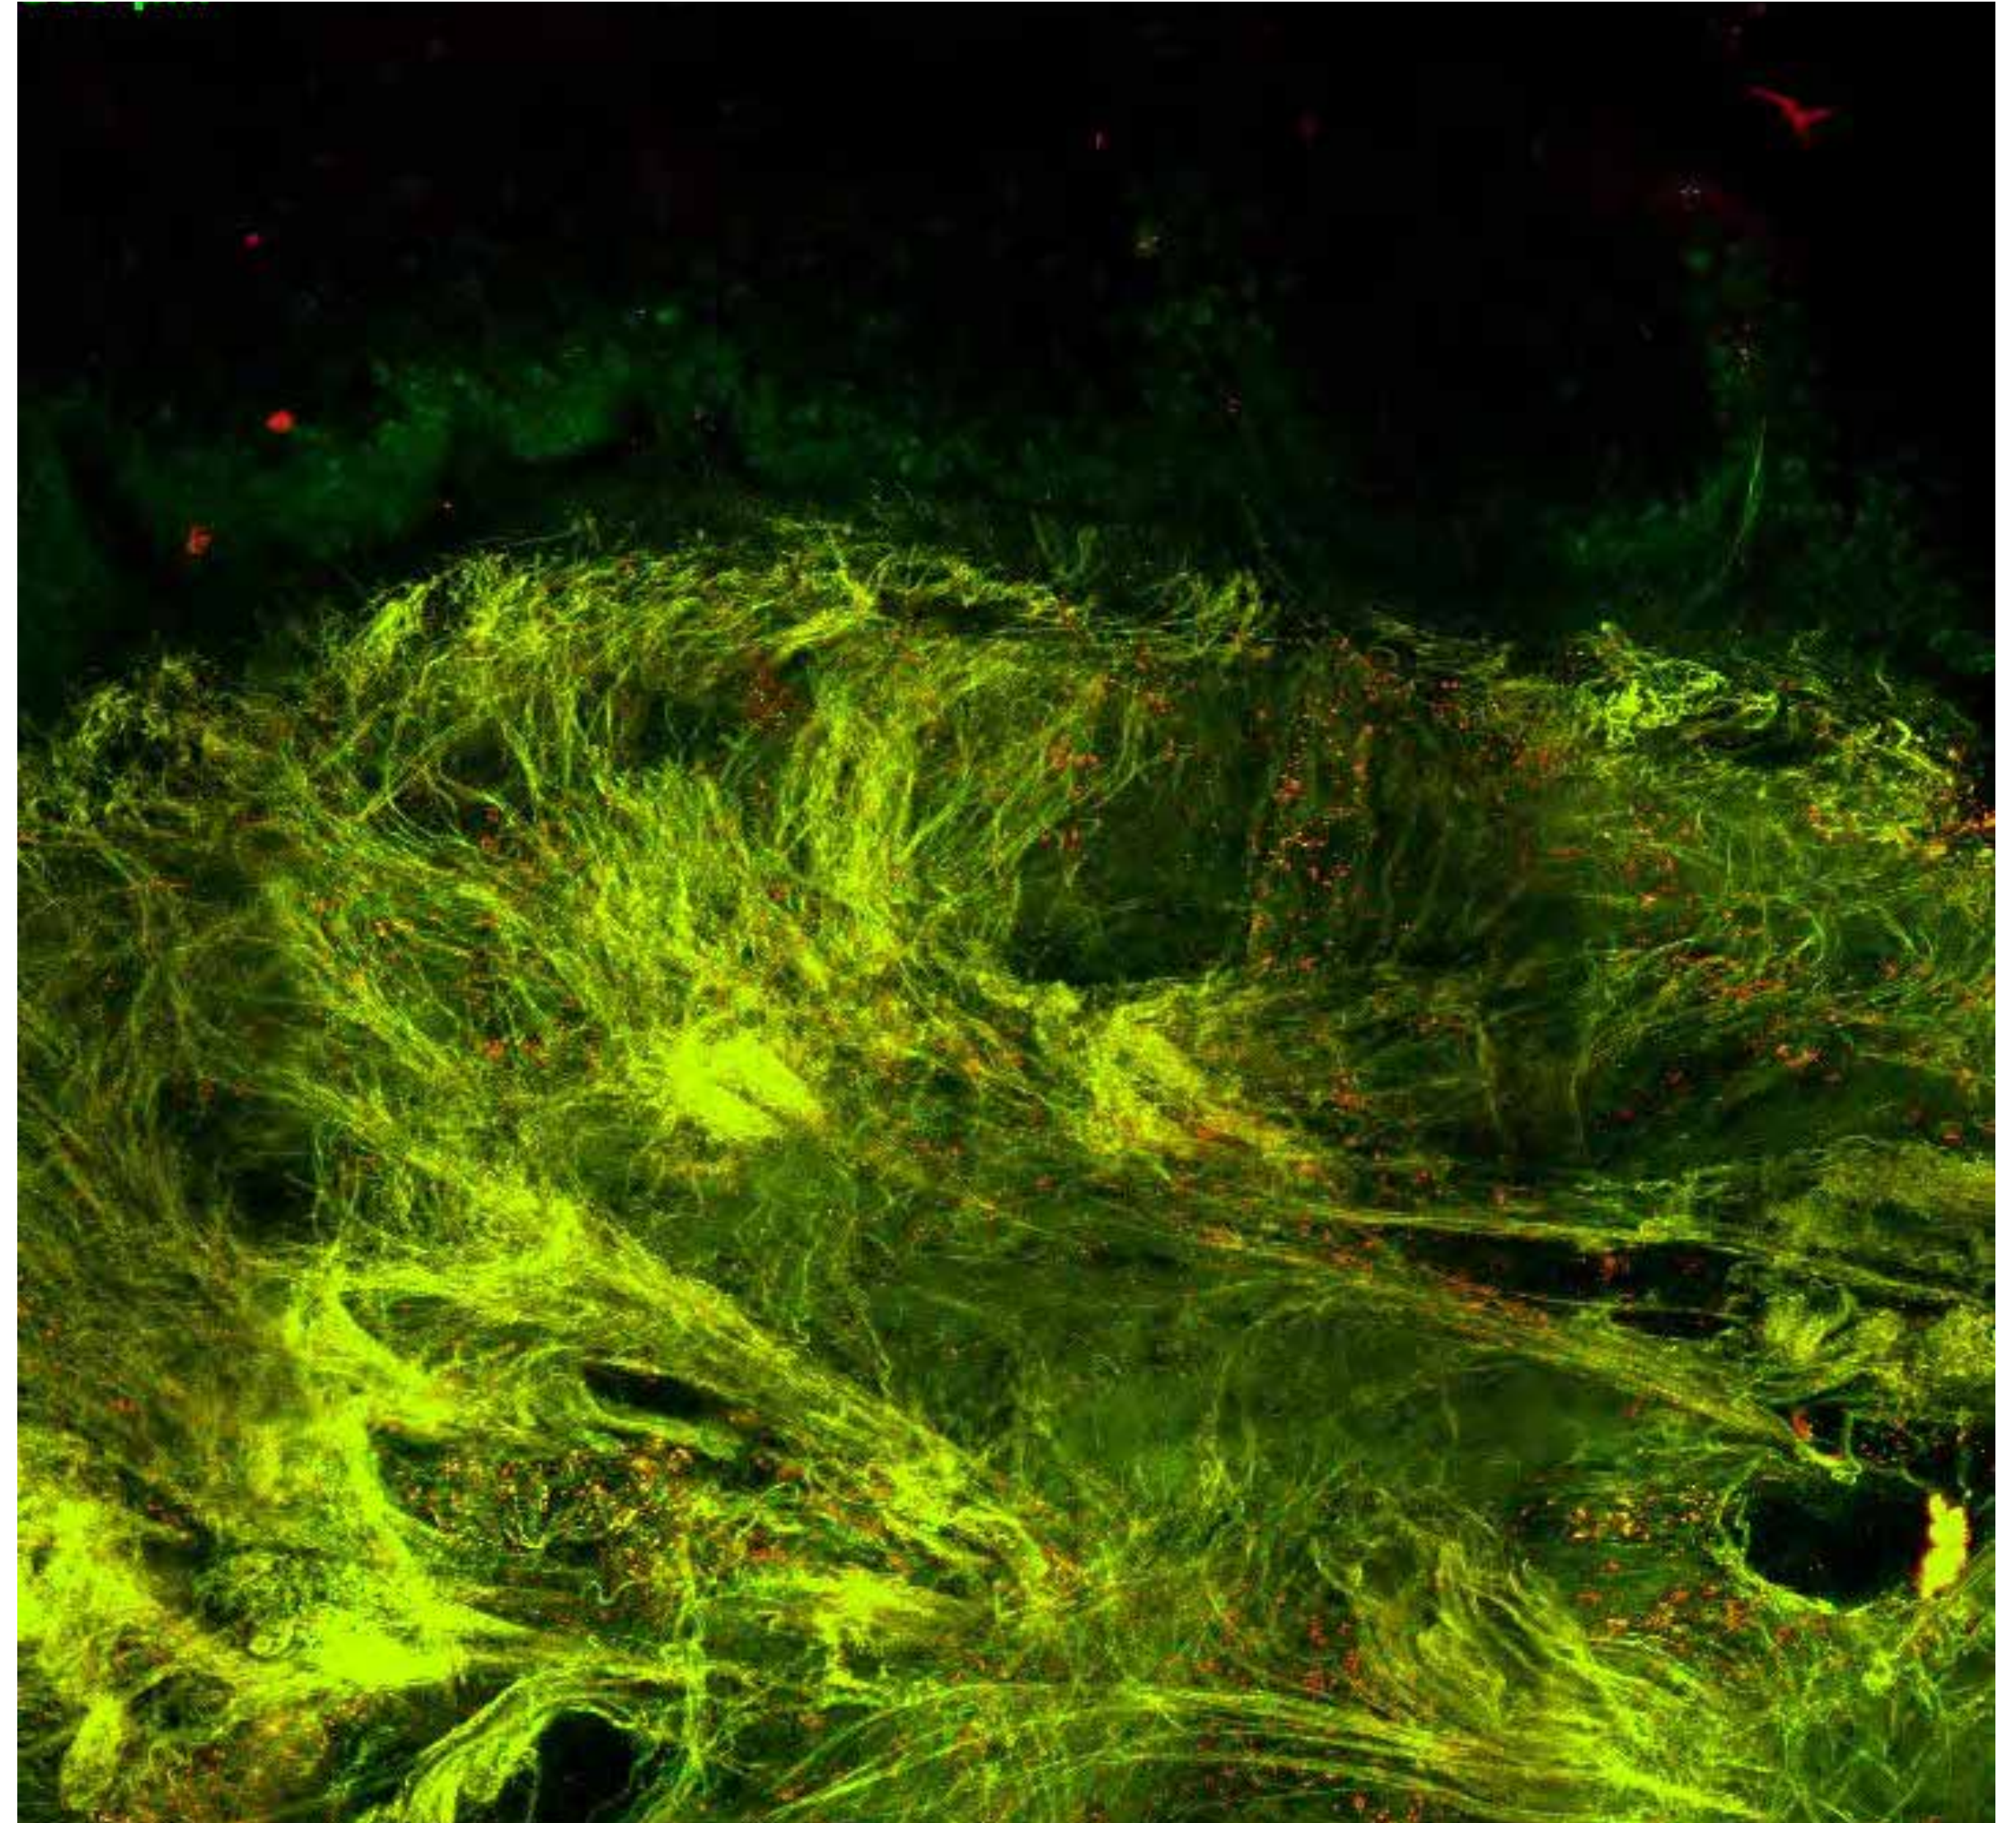

PARPi-FL (green) + Autofluorescence (red/yellow)



2154

Close-up

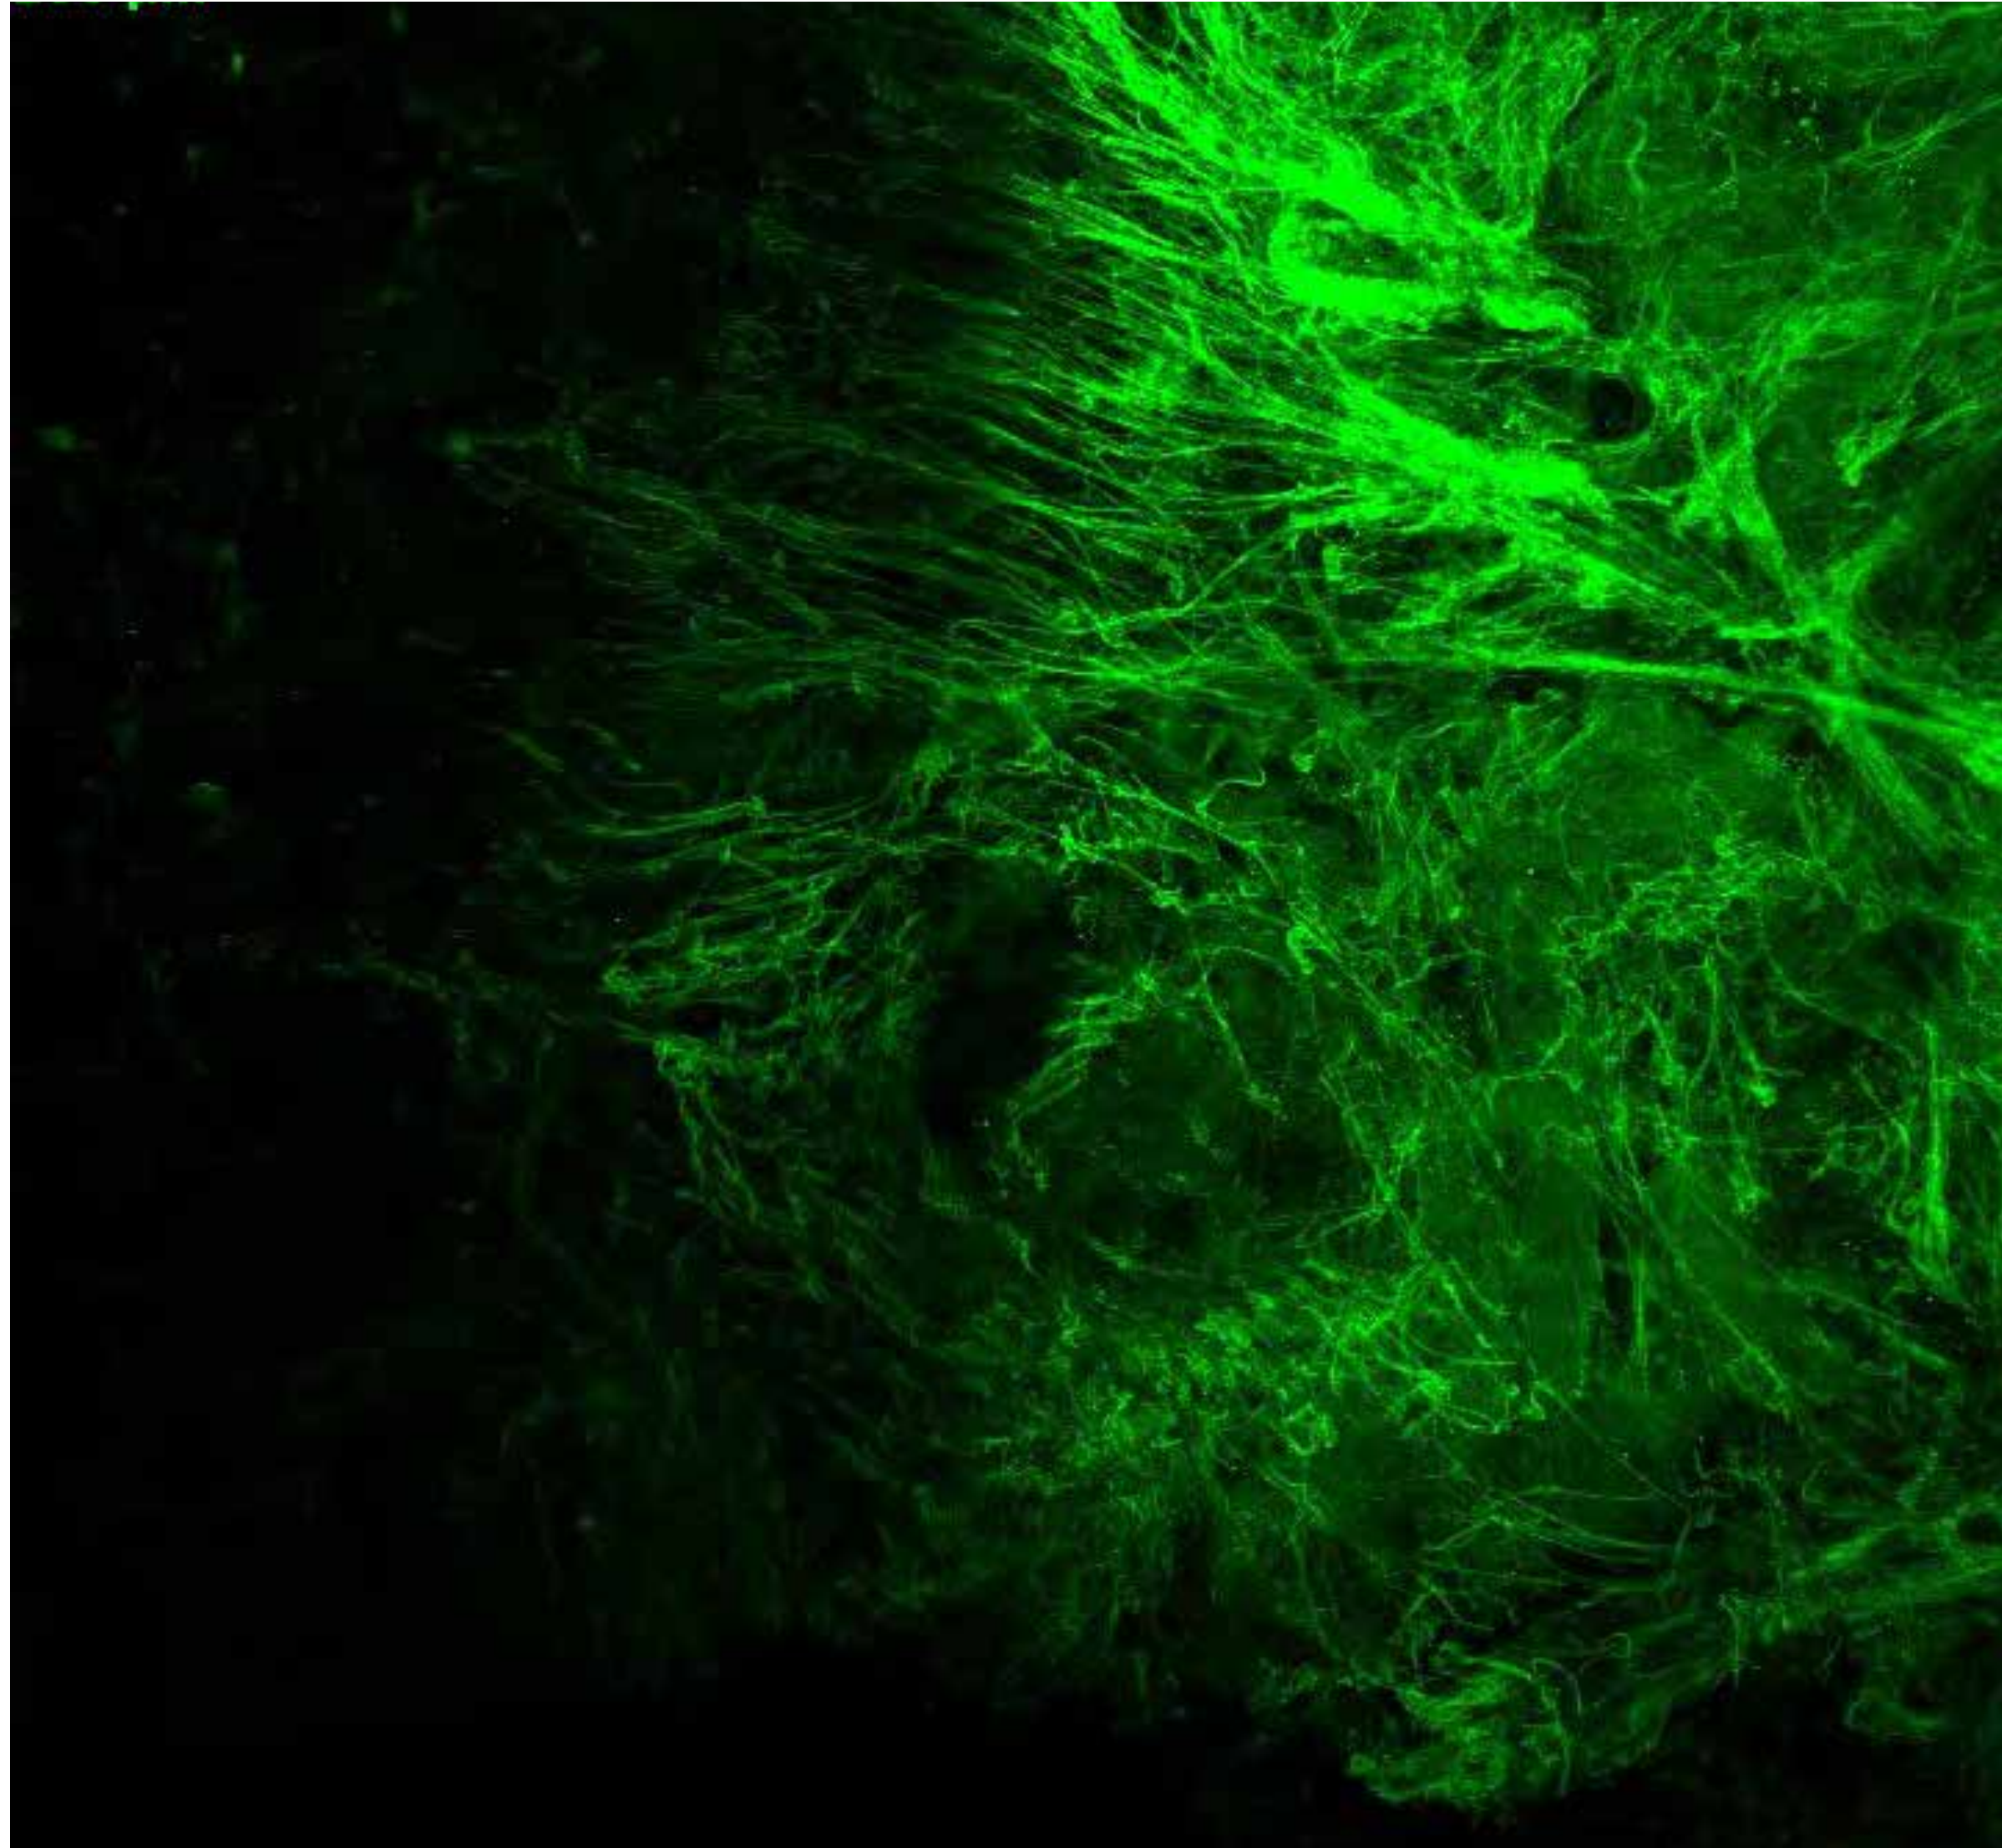

PARPi-FL only (green)

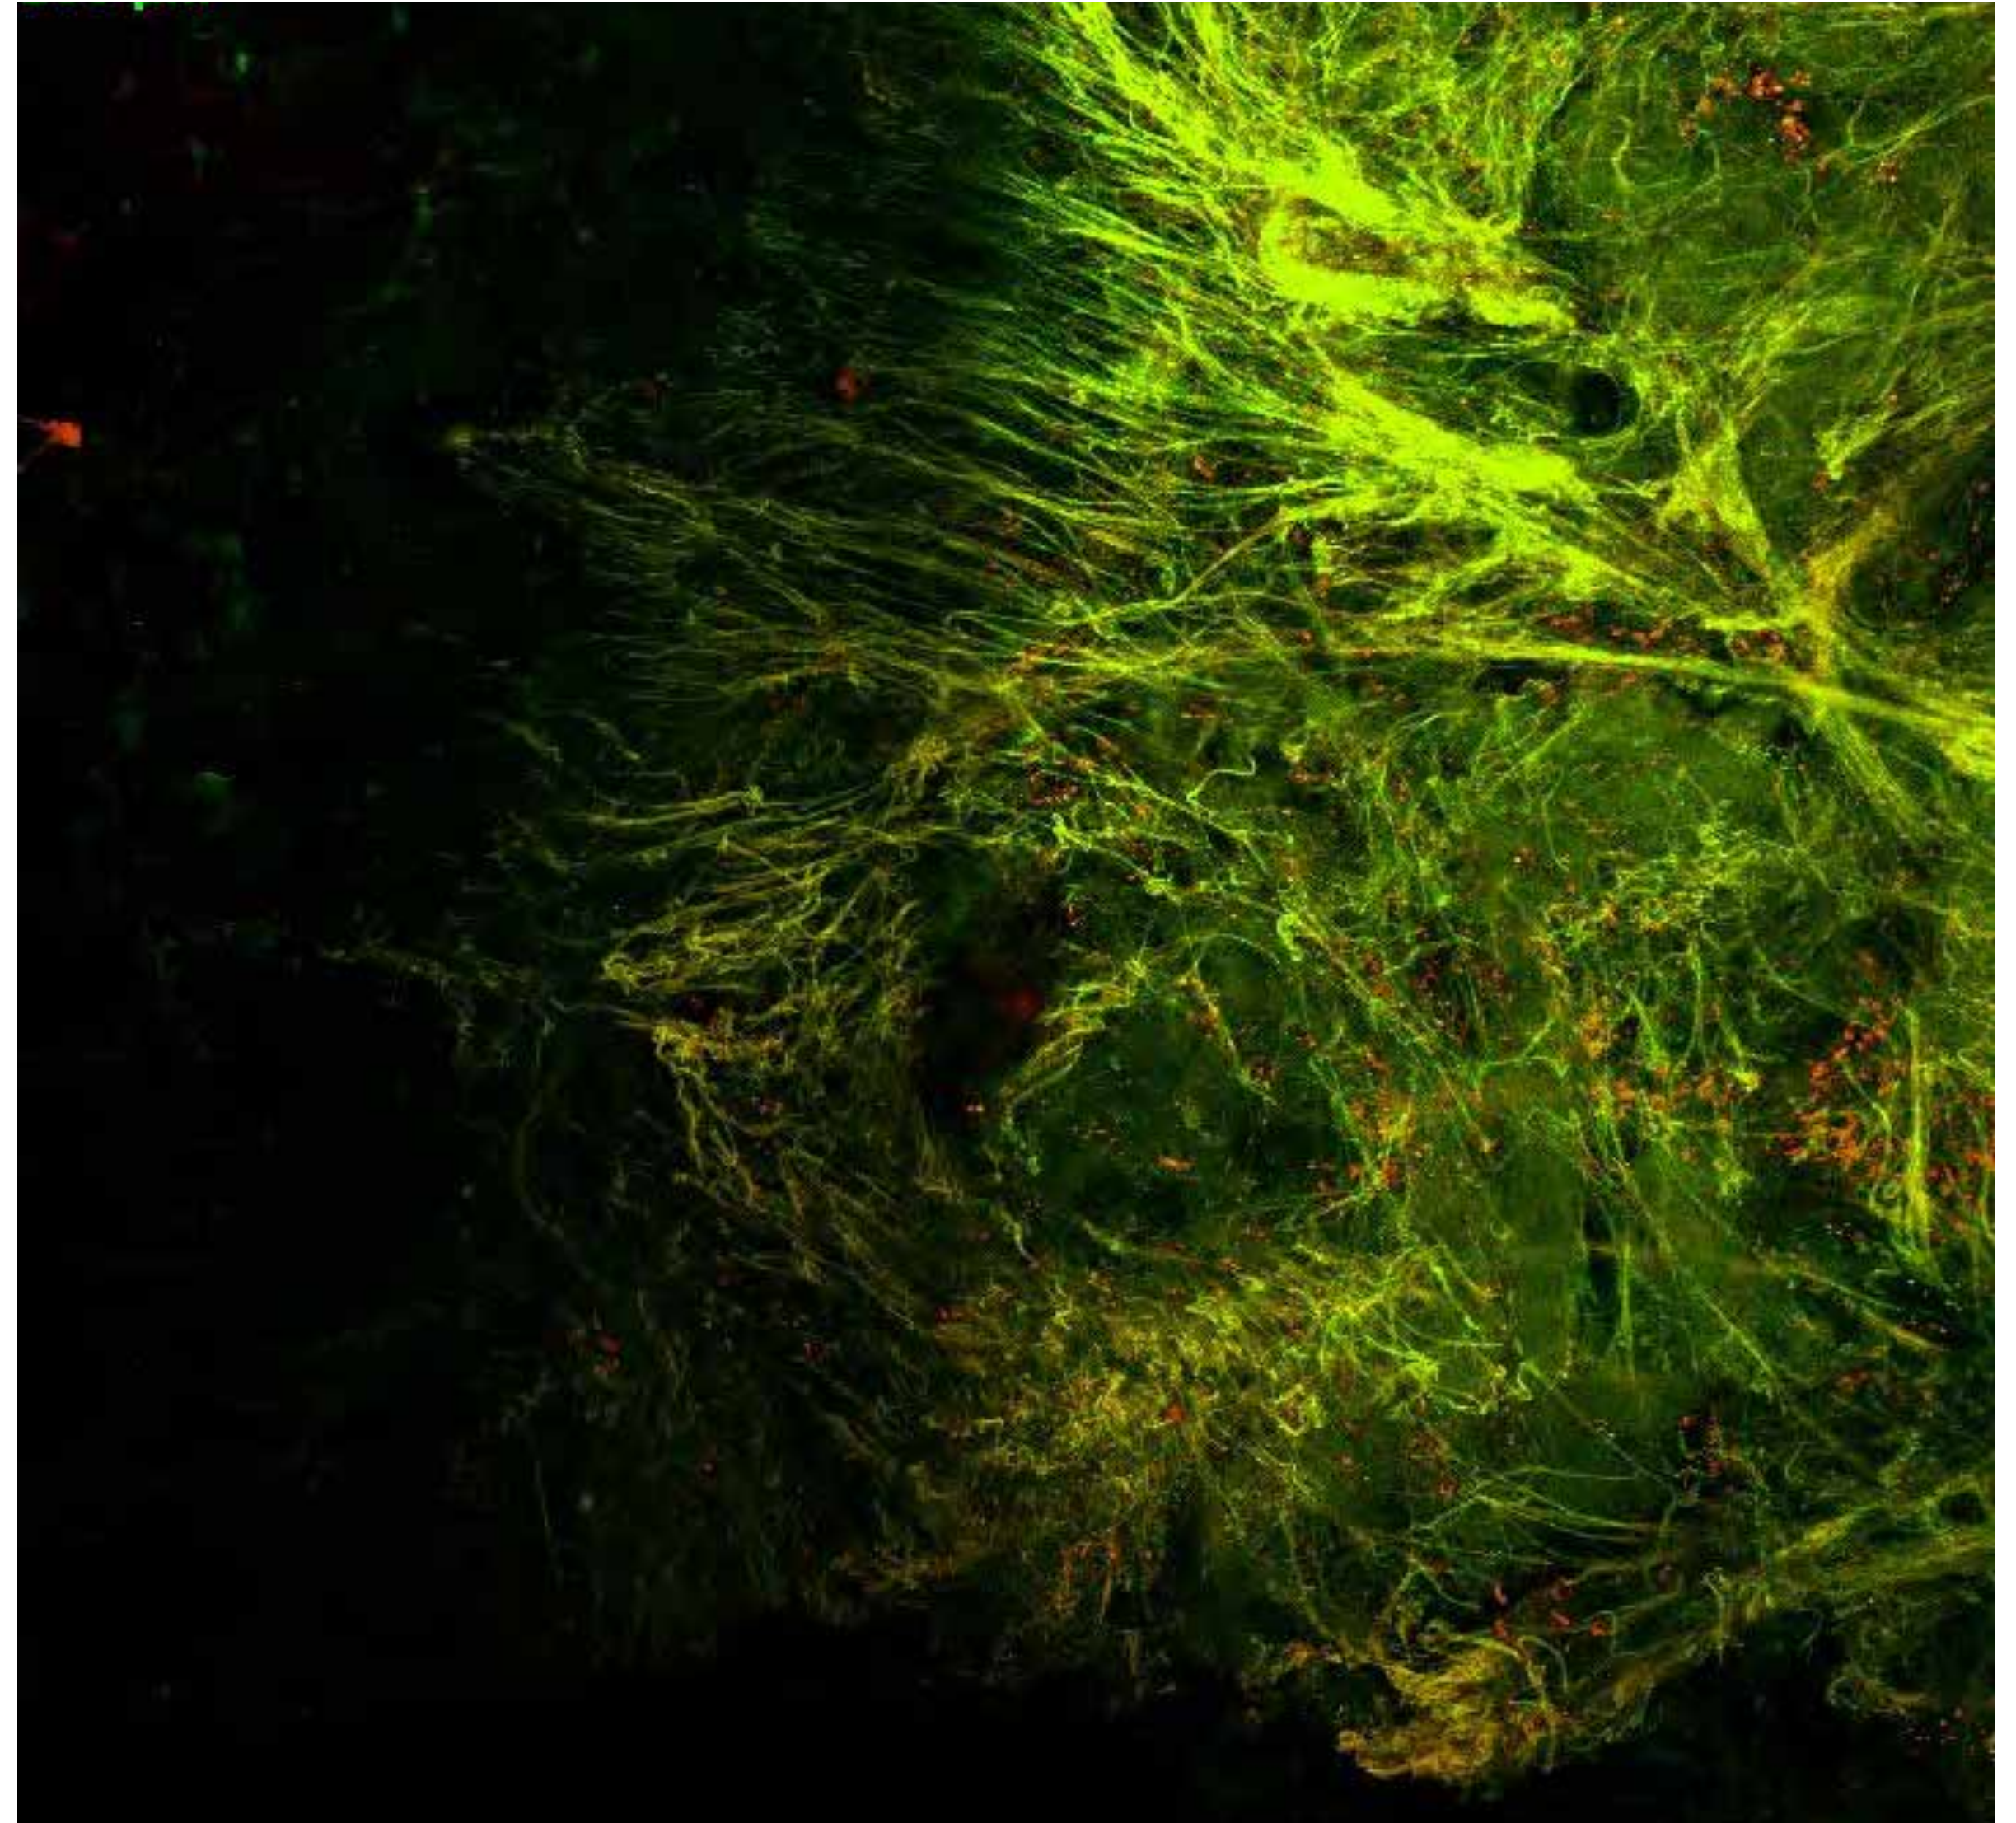

PARPi-FL (green) + Autofluorescence (red/yellow)



2154

Close-up

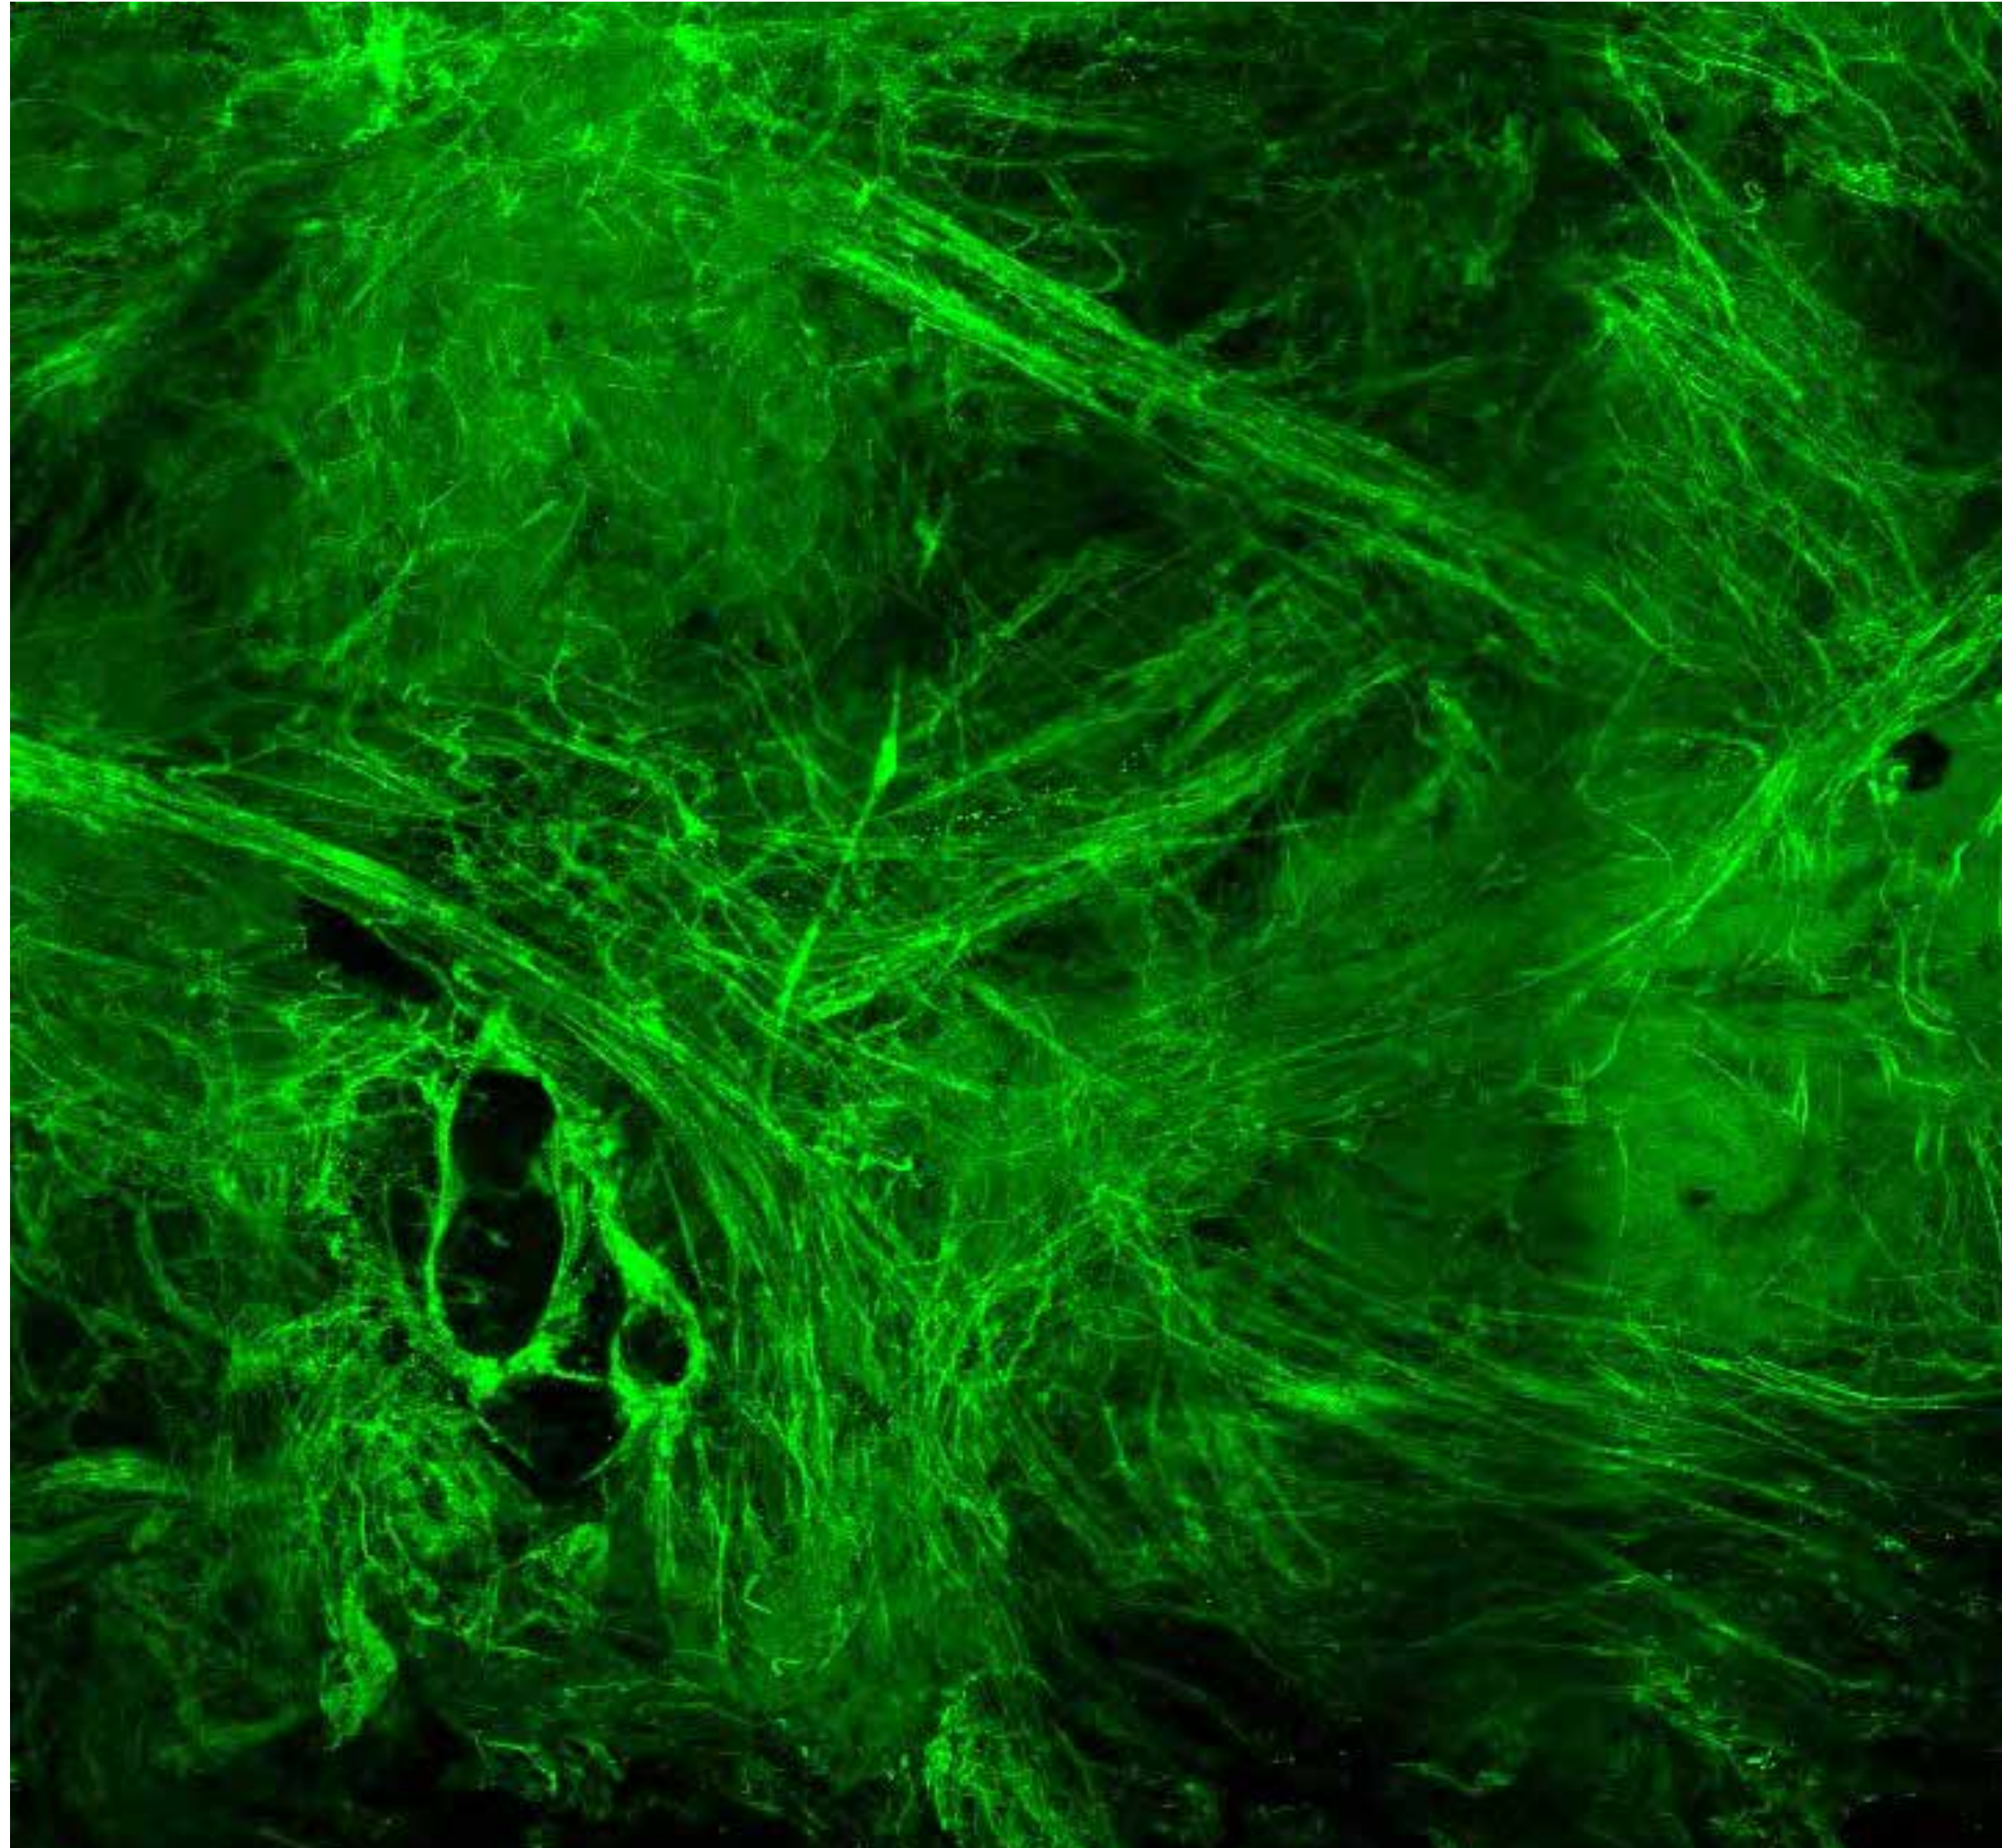

PARPi-FL only (green)

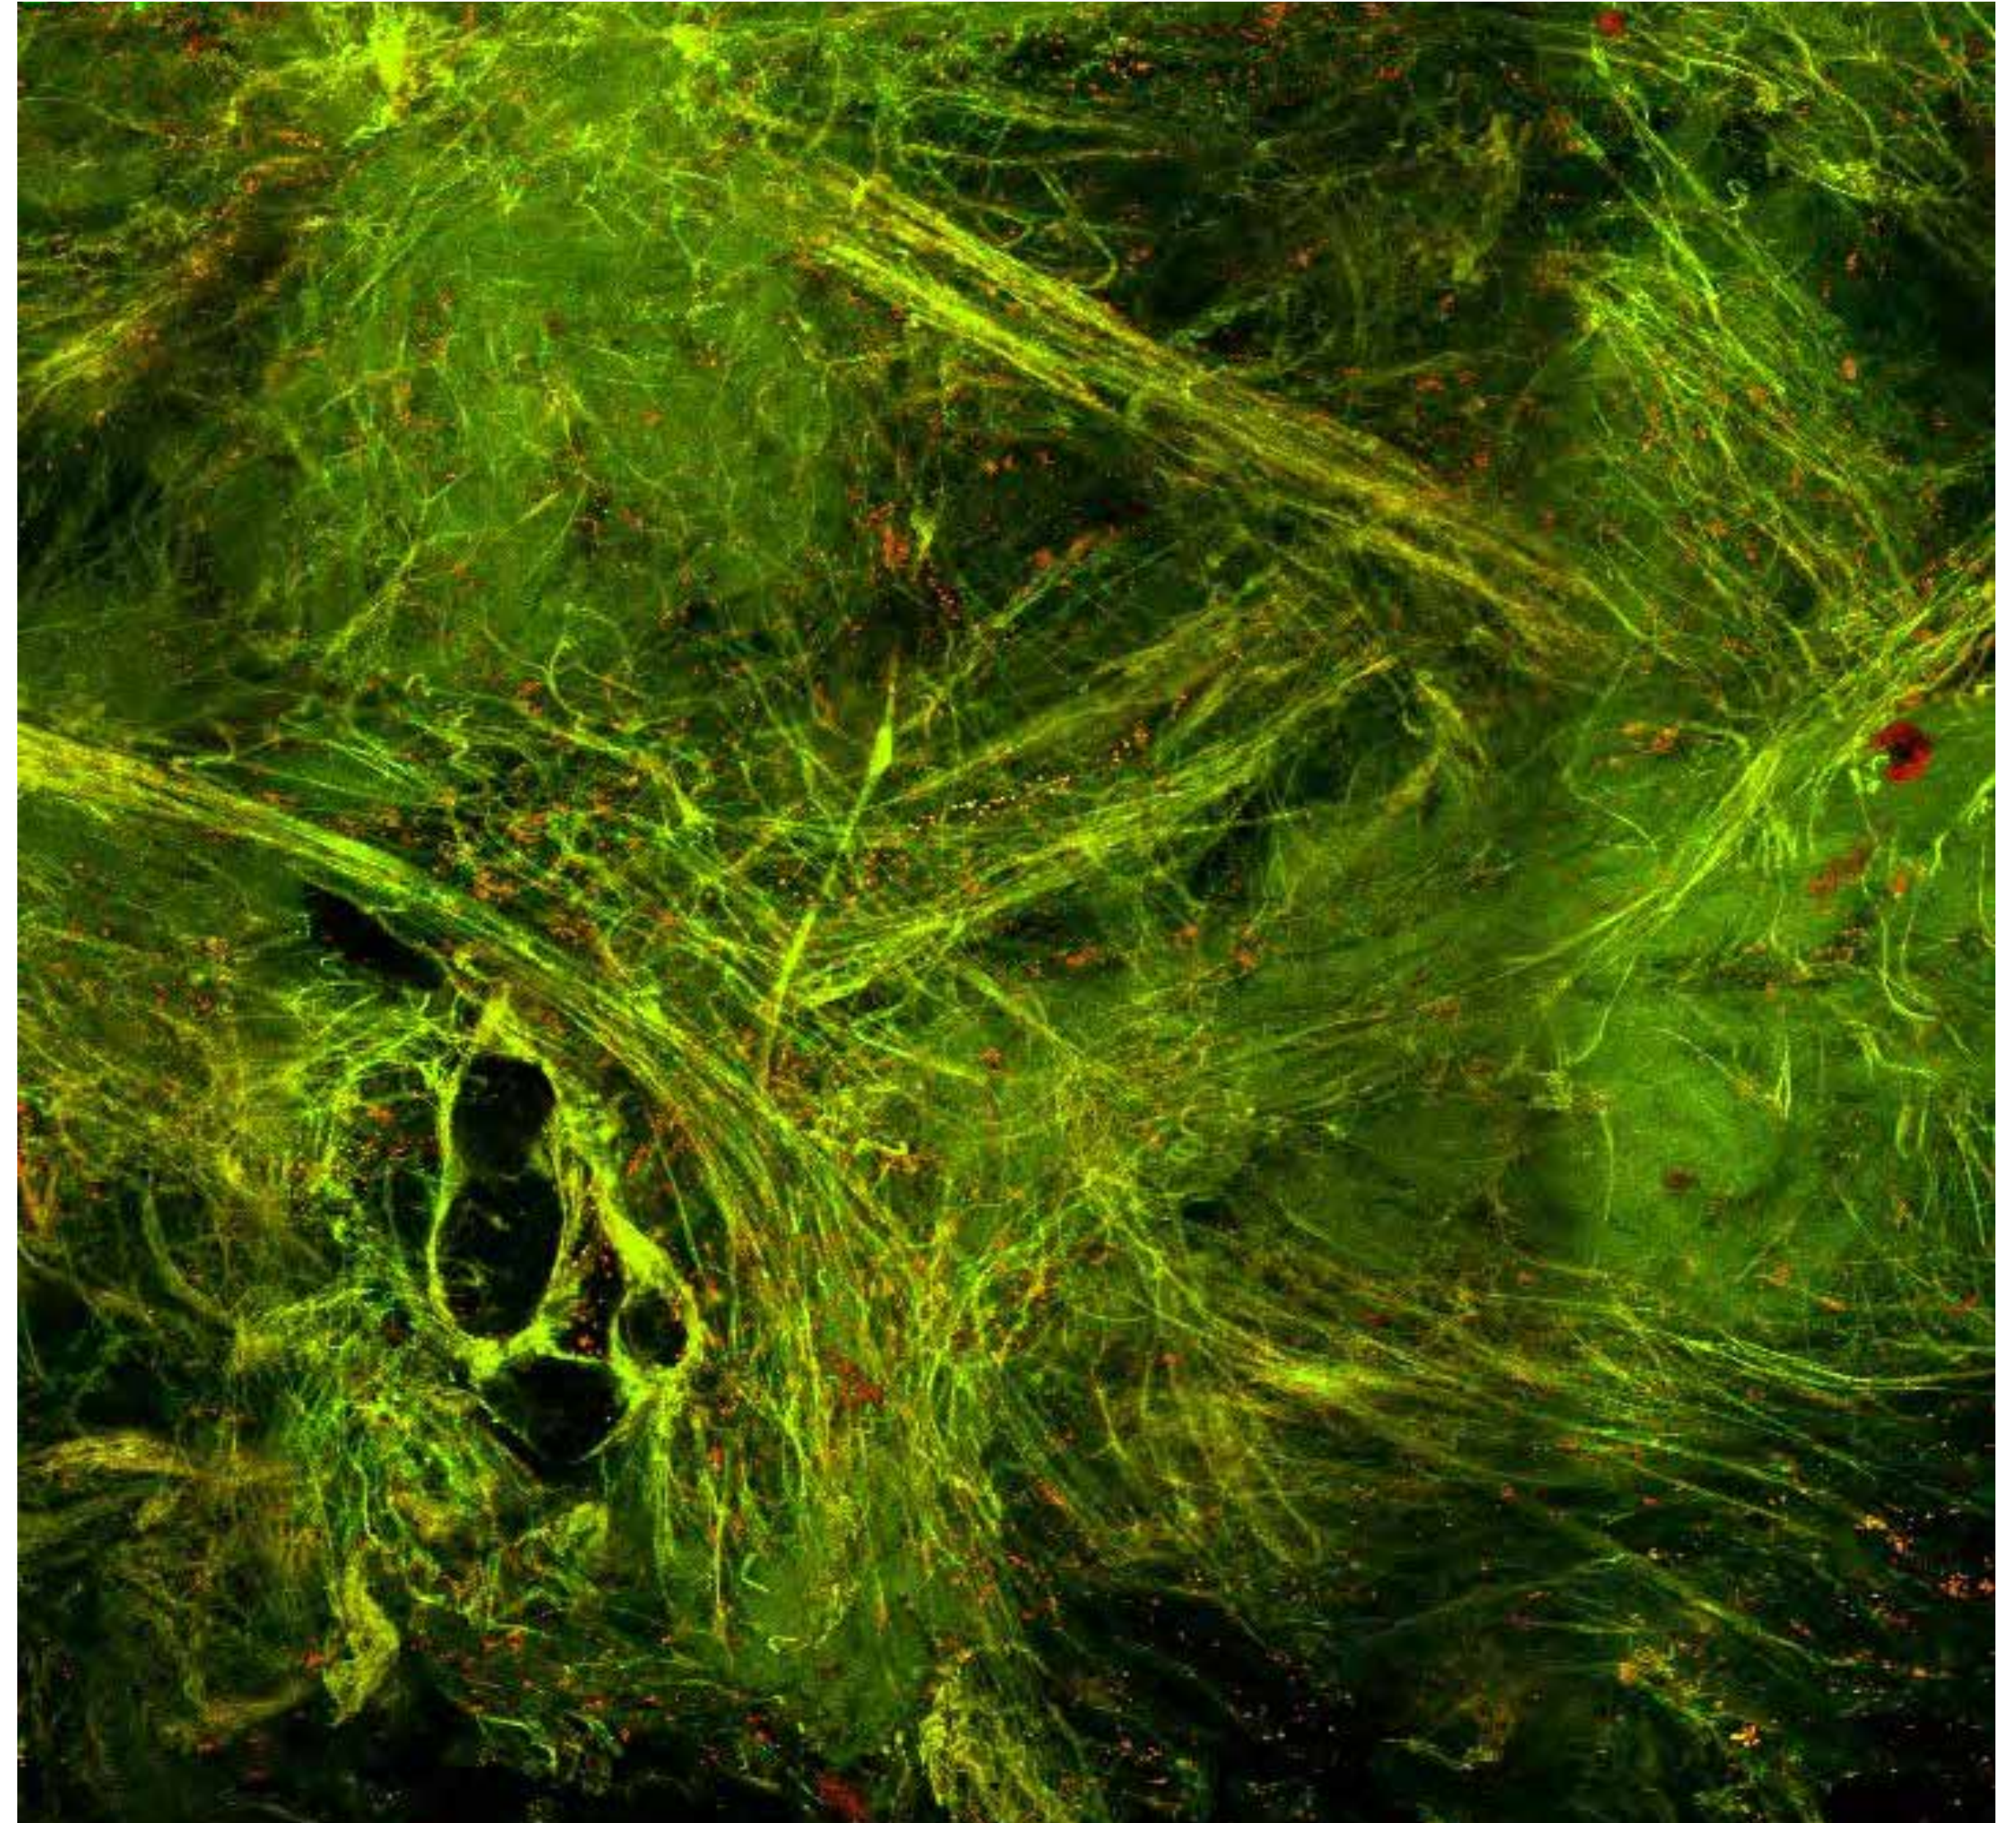

PARPi-FL (green) + Autofluorescence (red/yellow)



2154

10

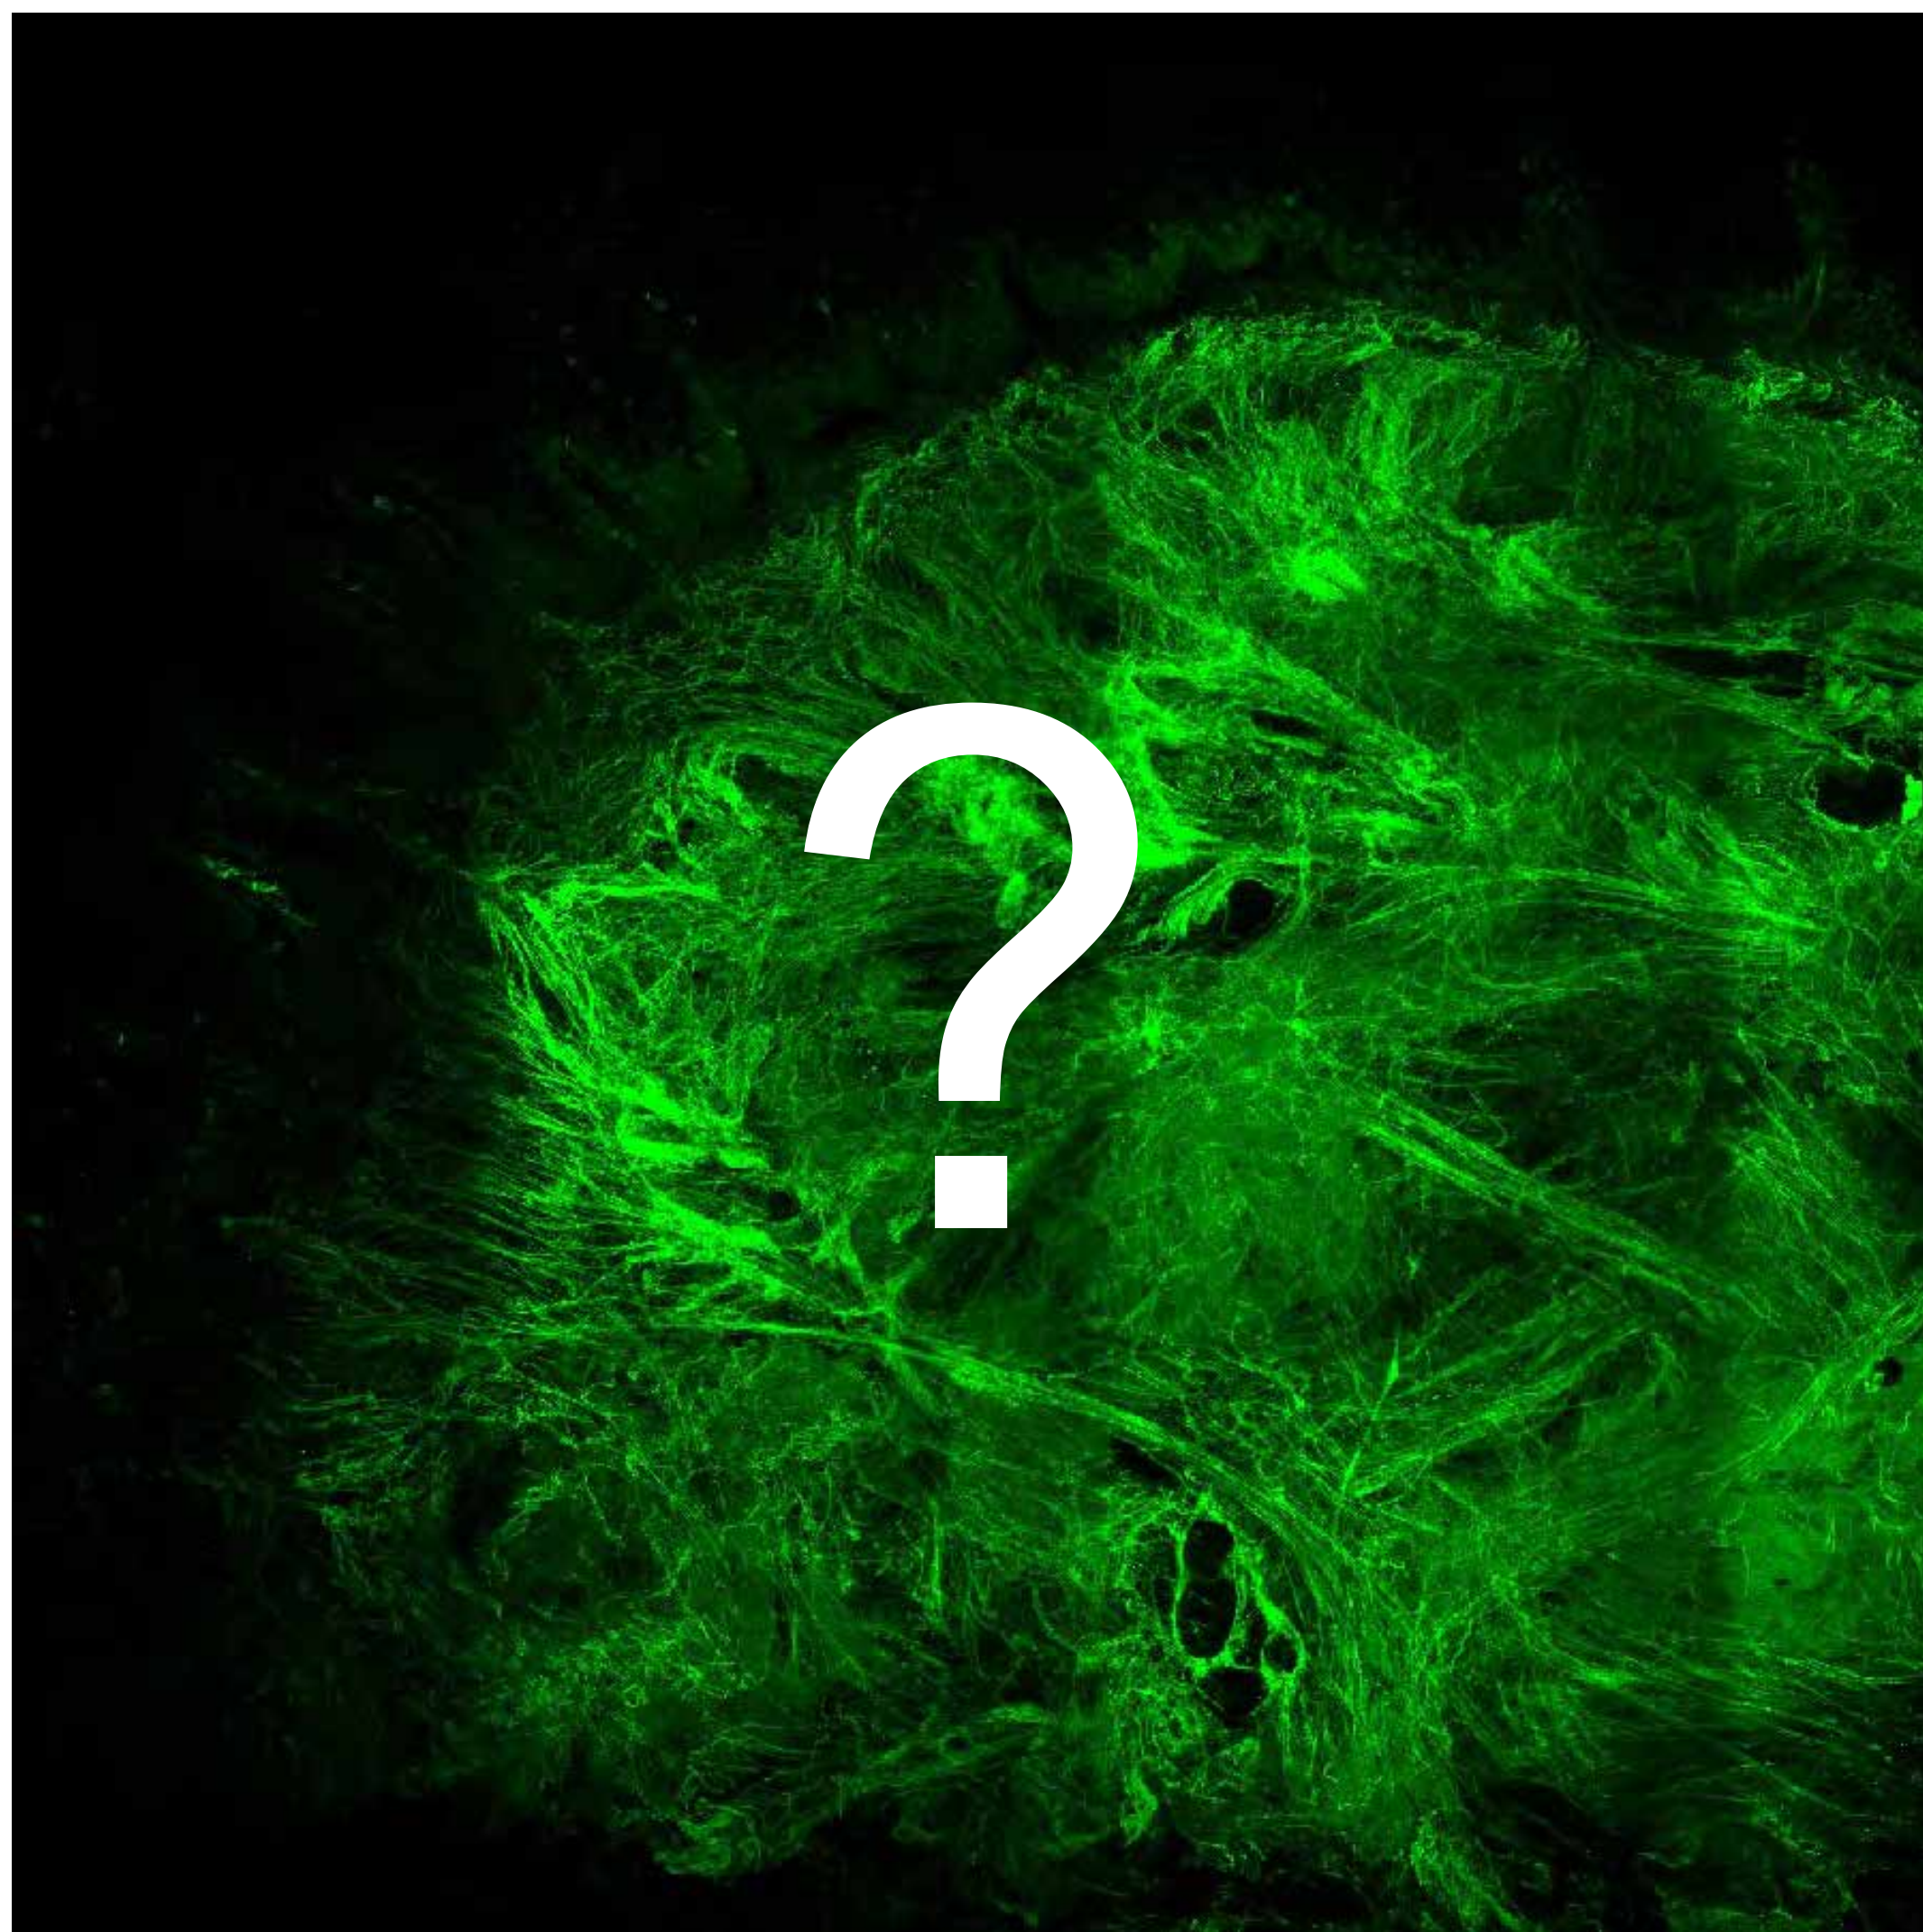

Tumor

Margin



Not available

Not available



2225

Close-up

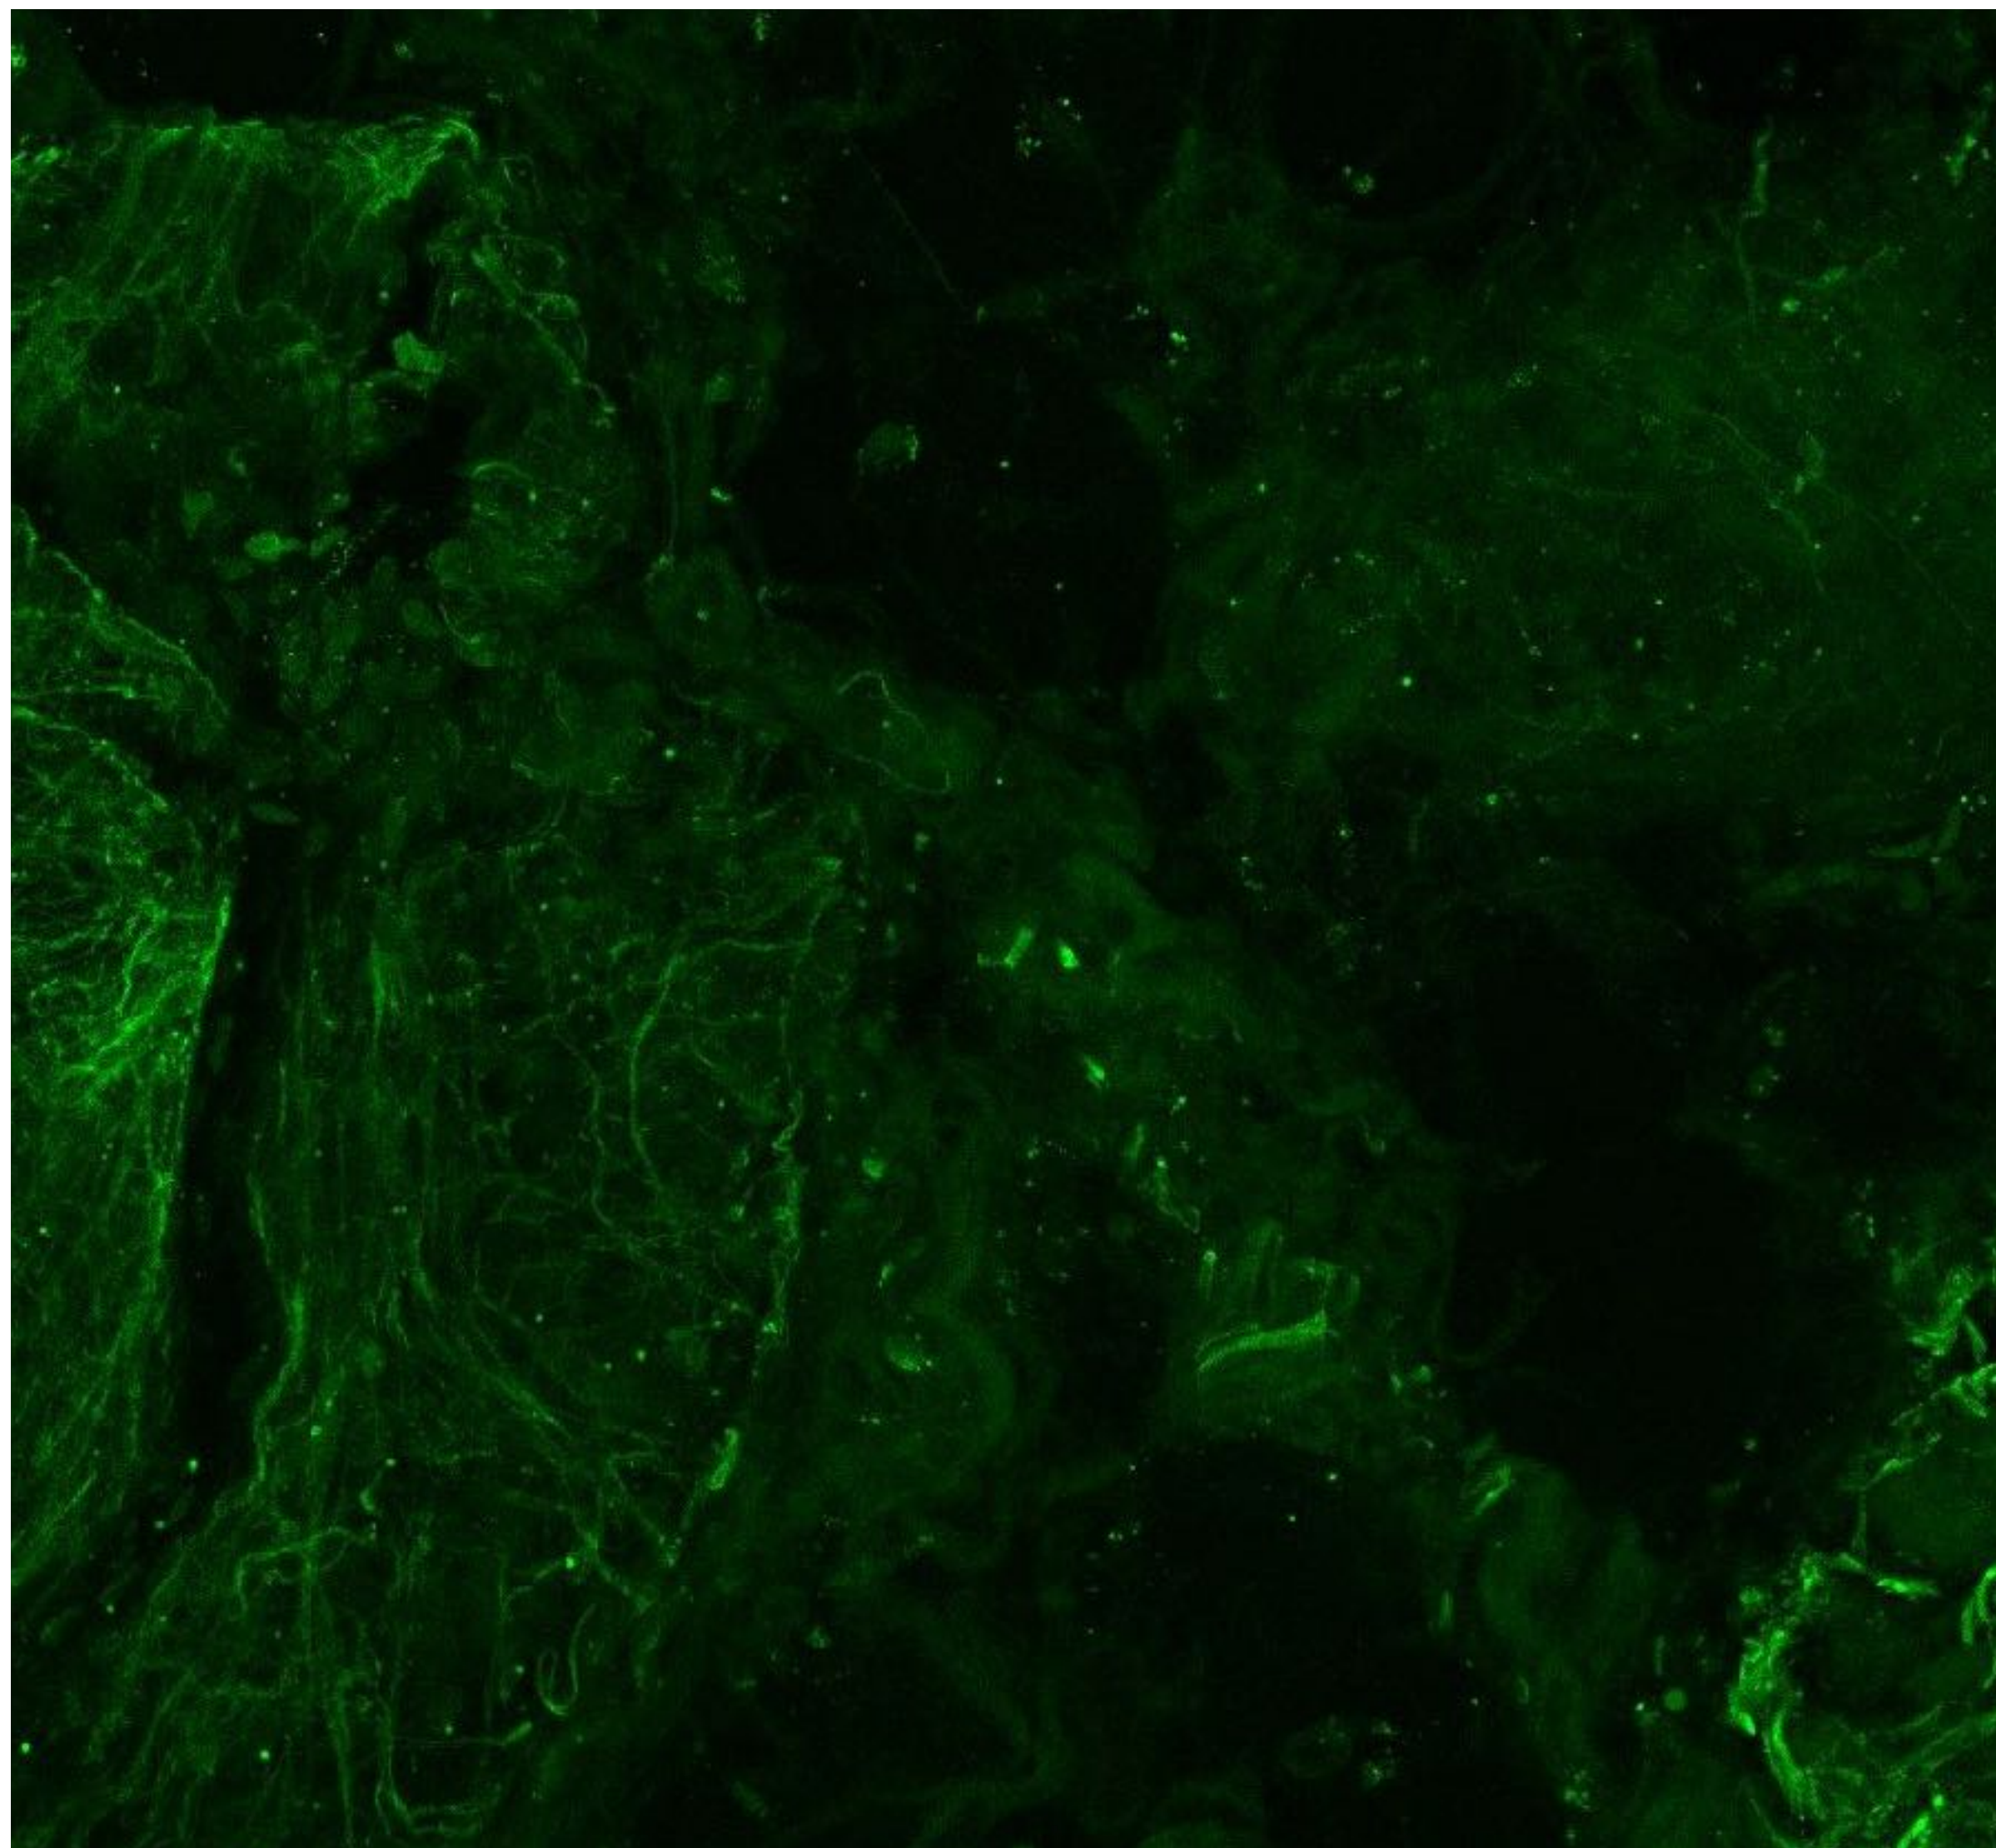

PARPi-FL only (green)

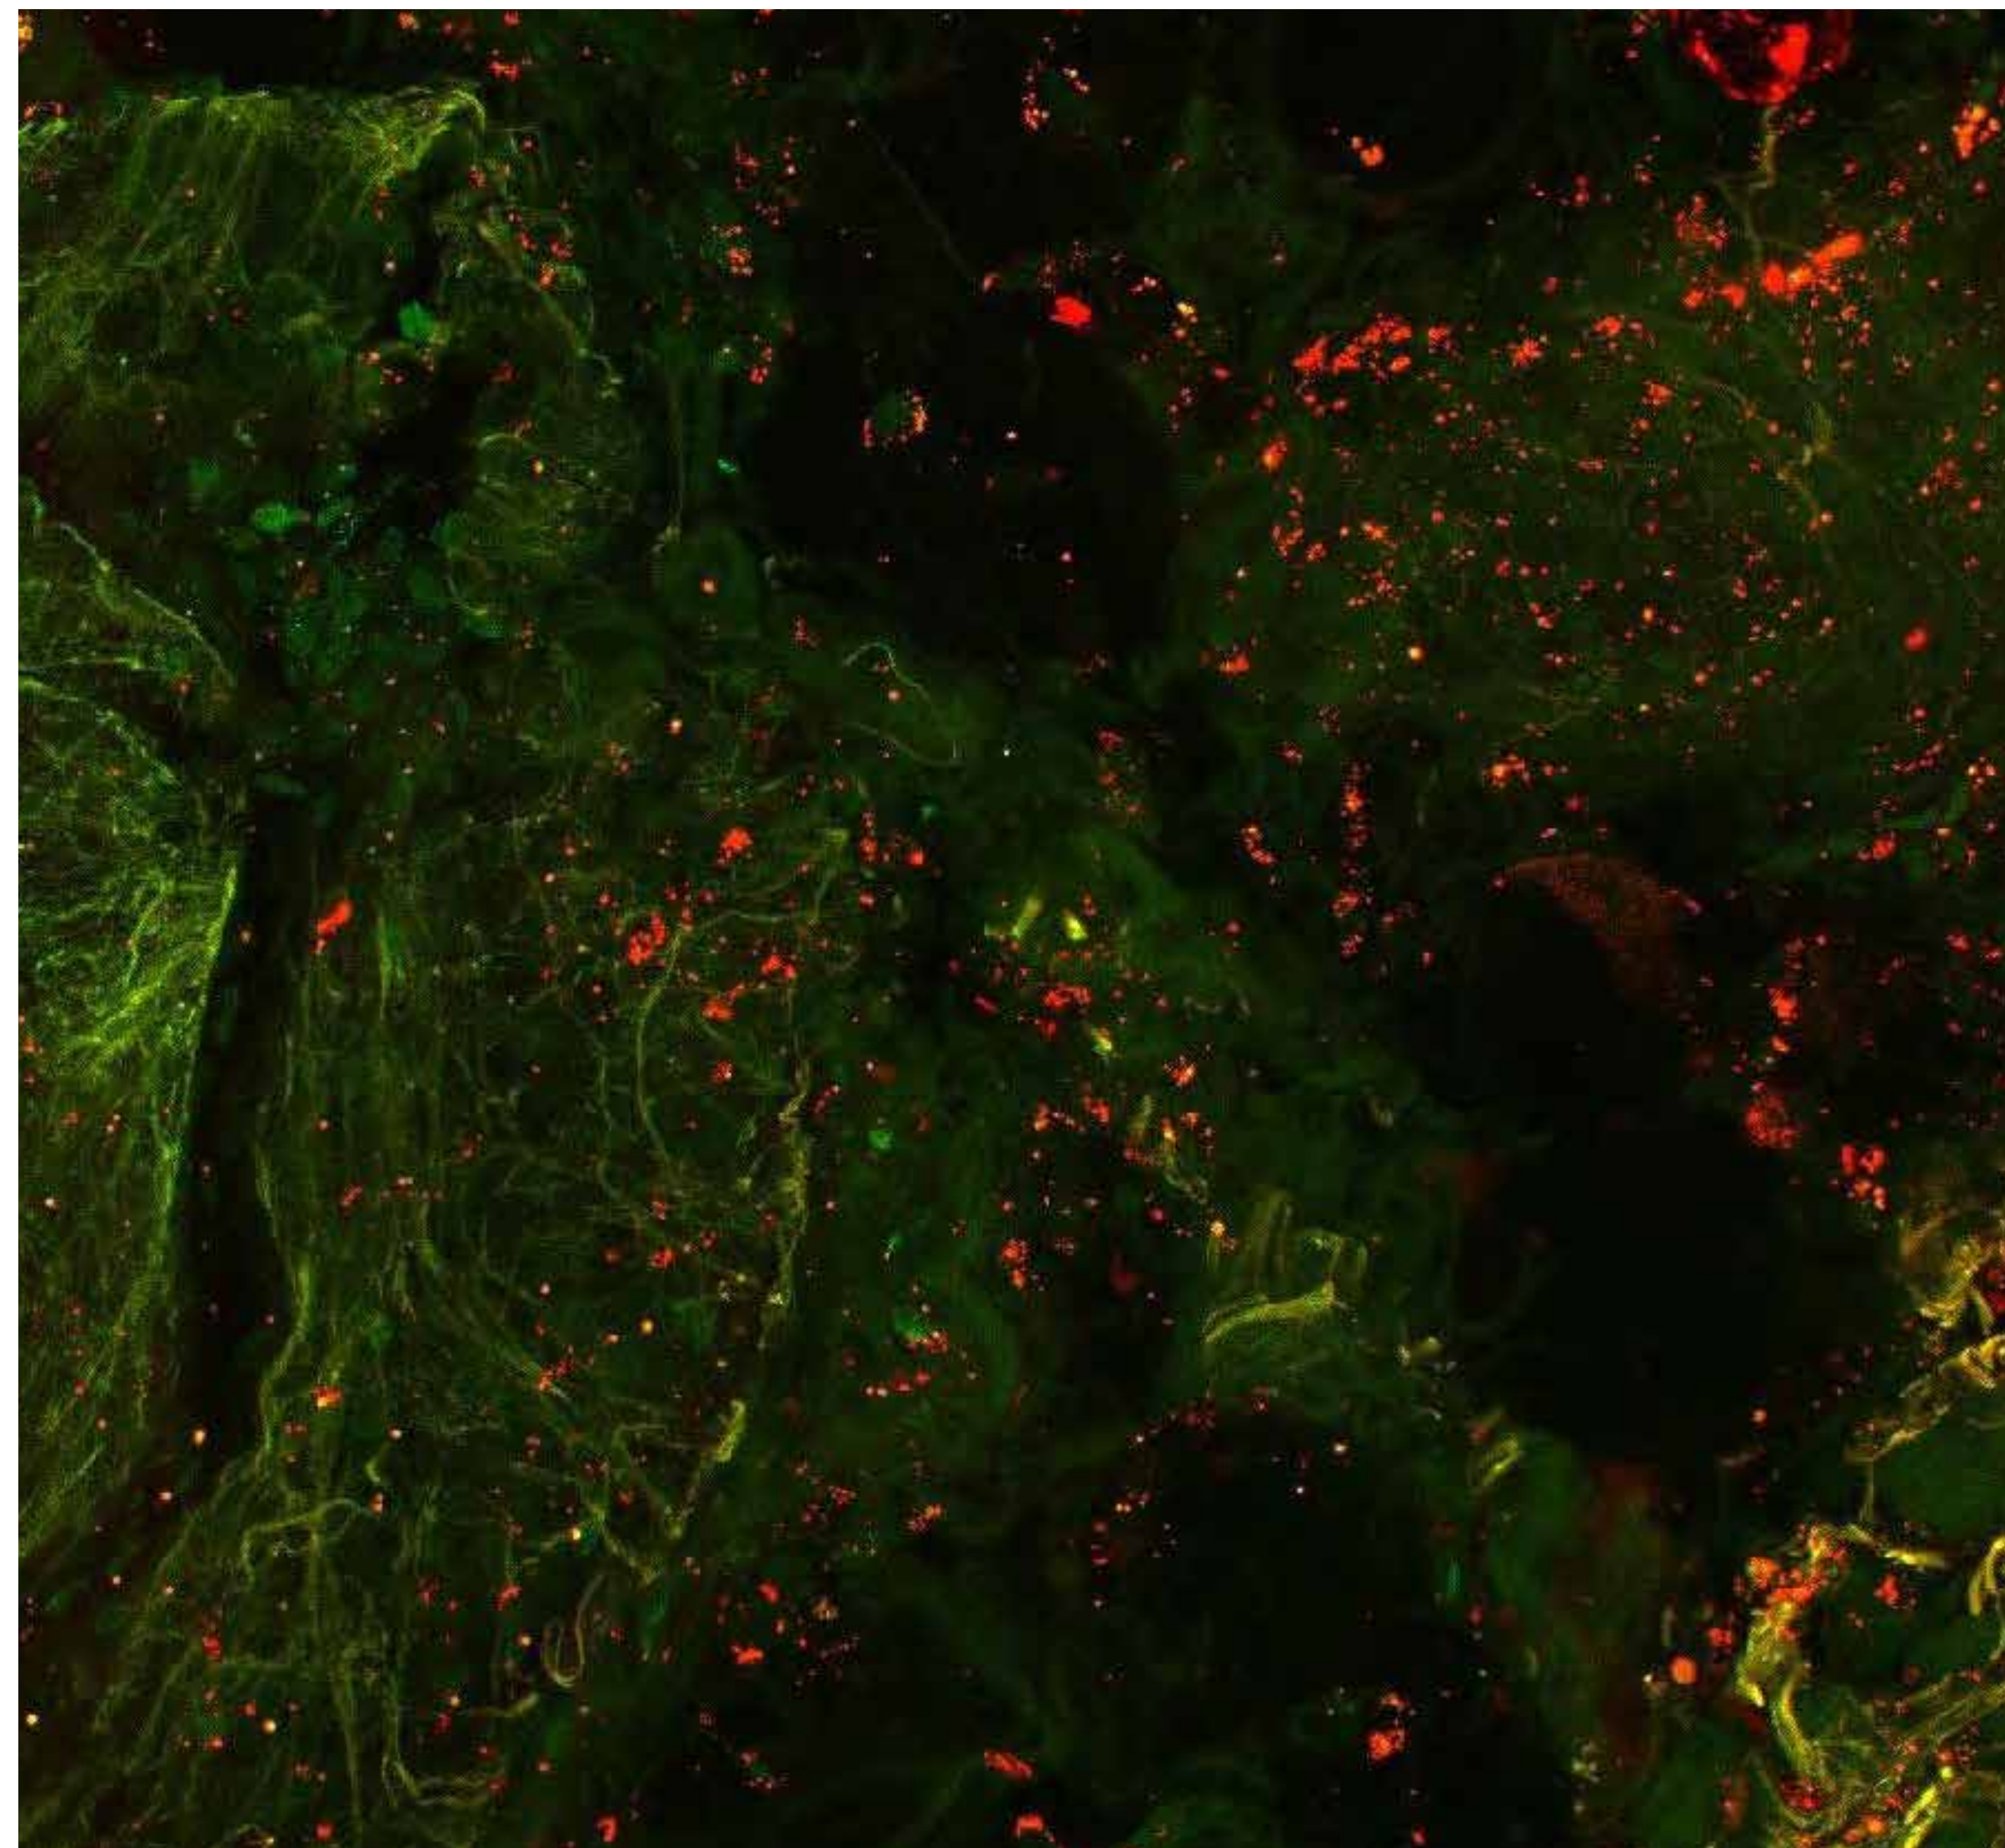

PARPi-FL (green) + Autofluorescence (red/yellow)



2225

Close-up

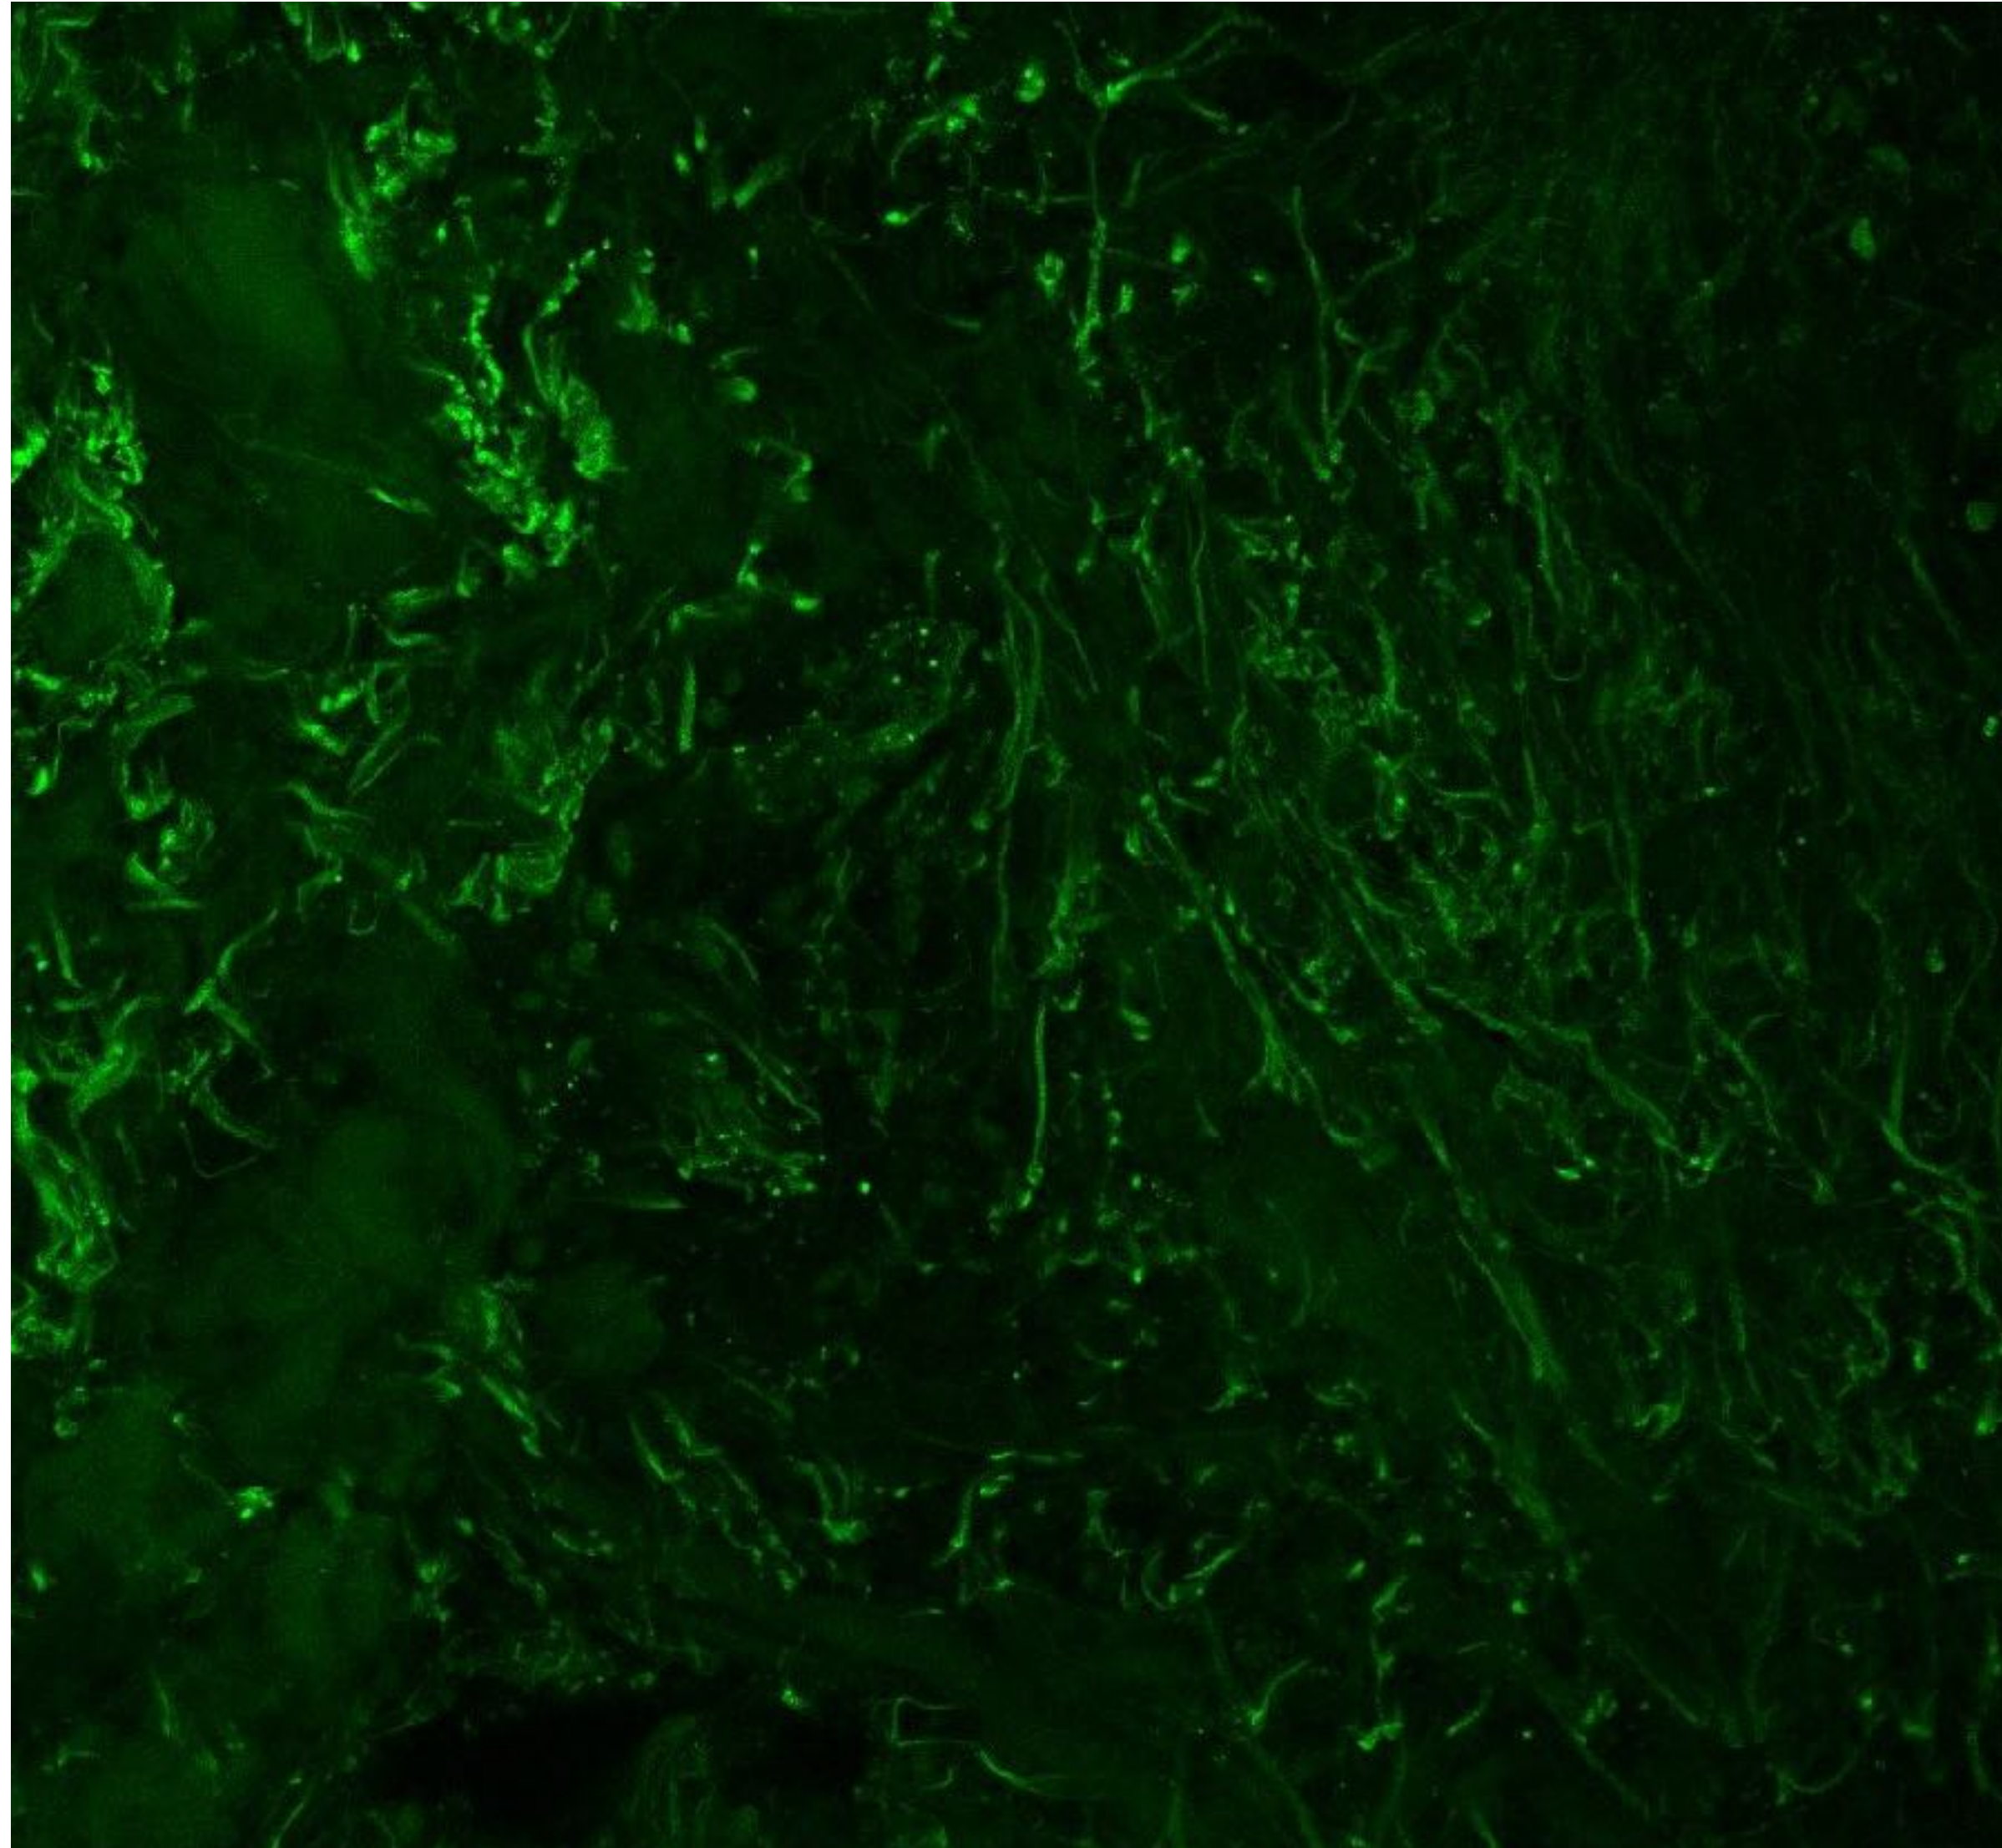

PARPi-FL only (green)

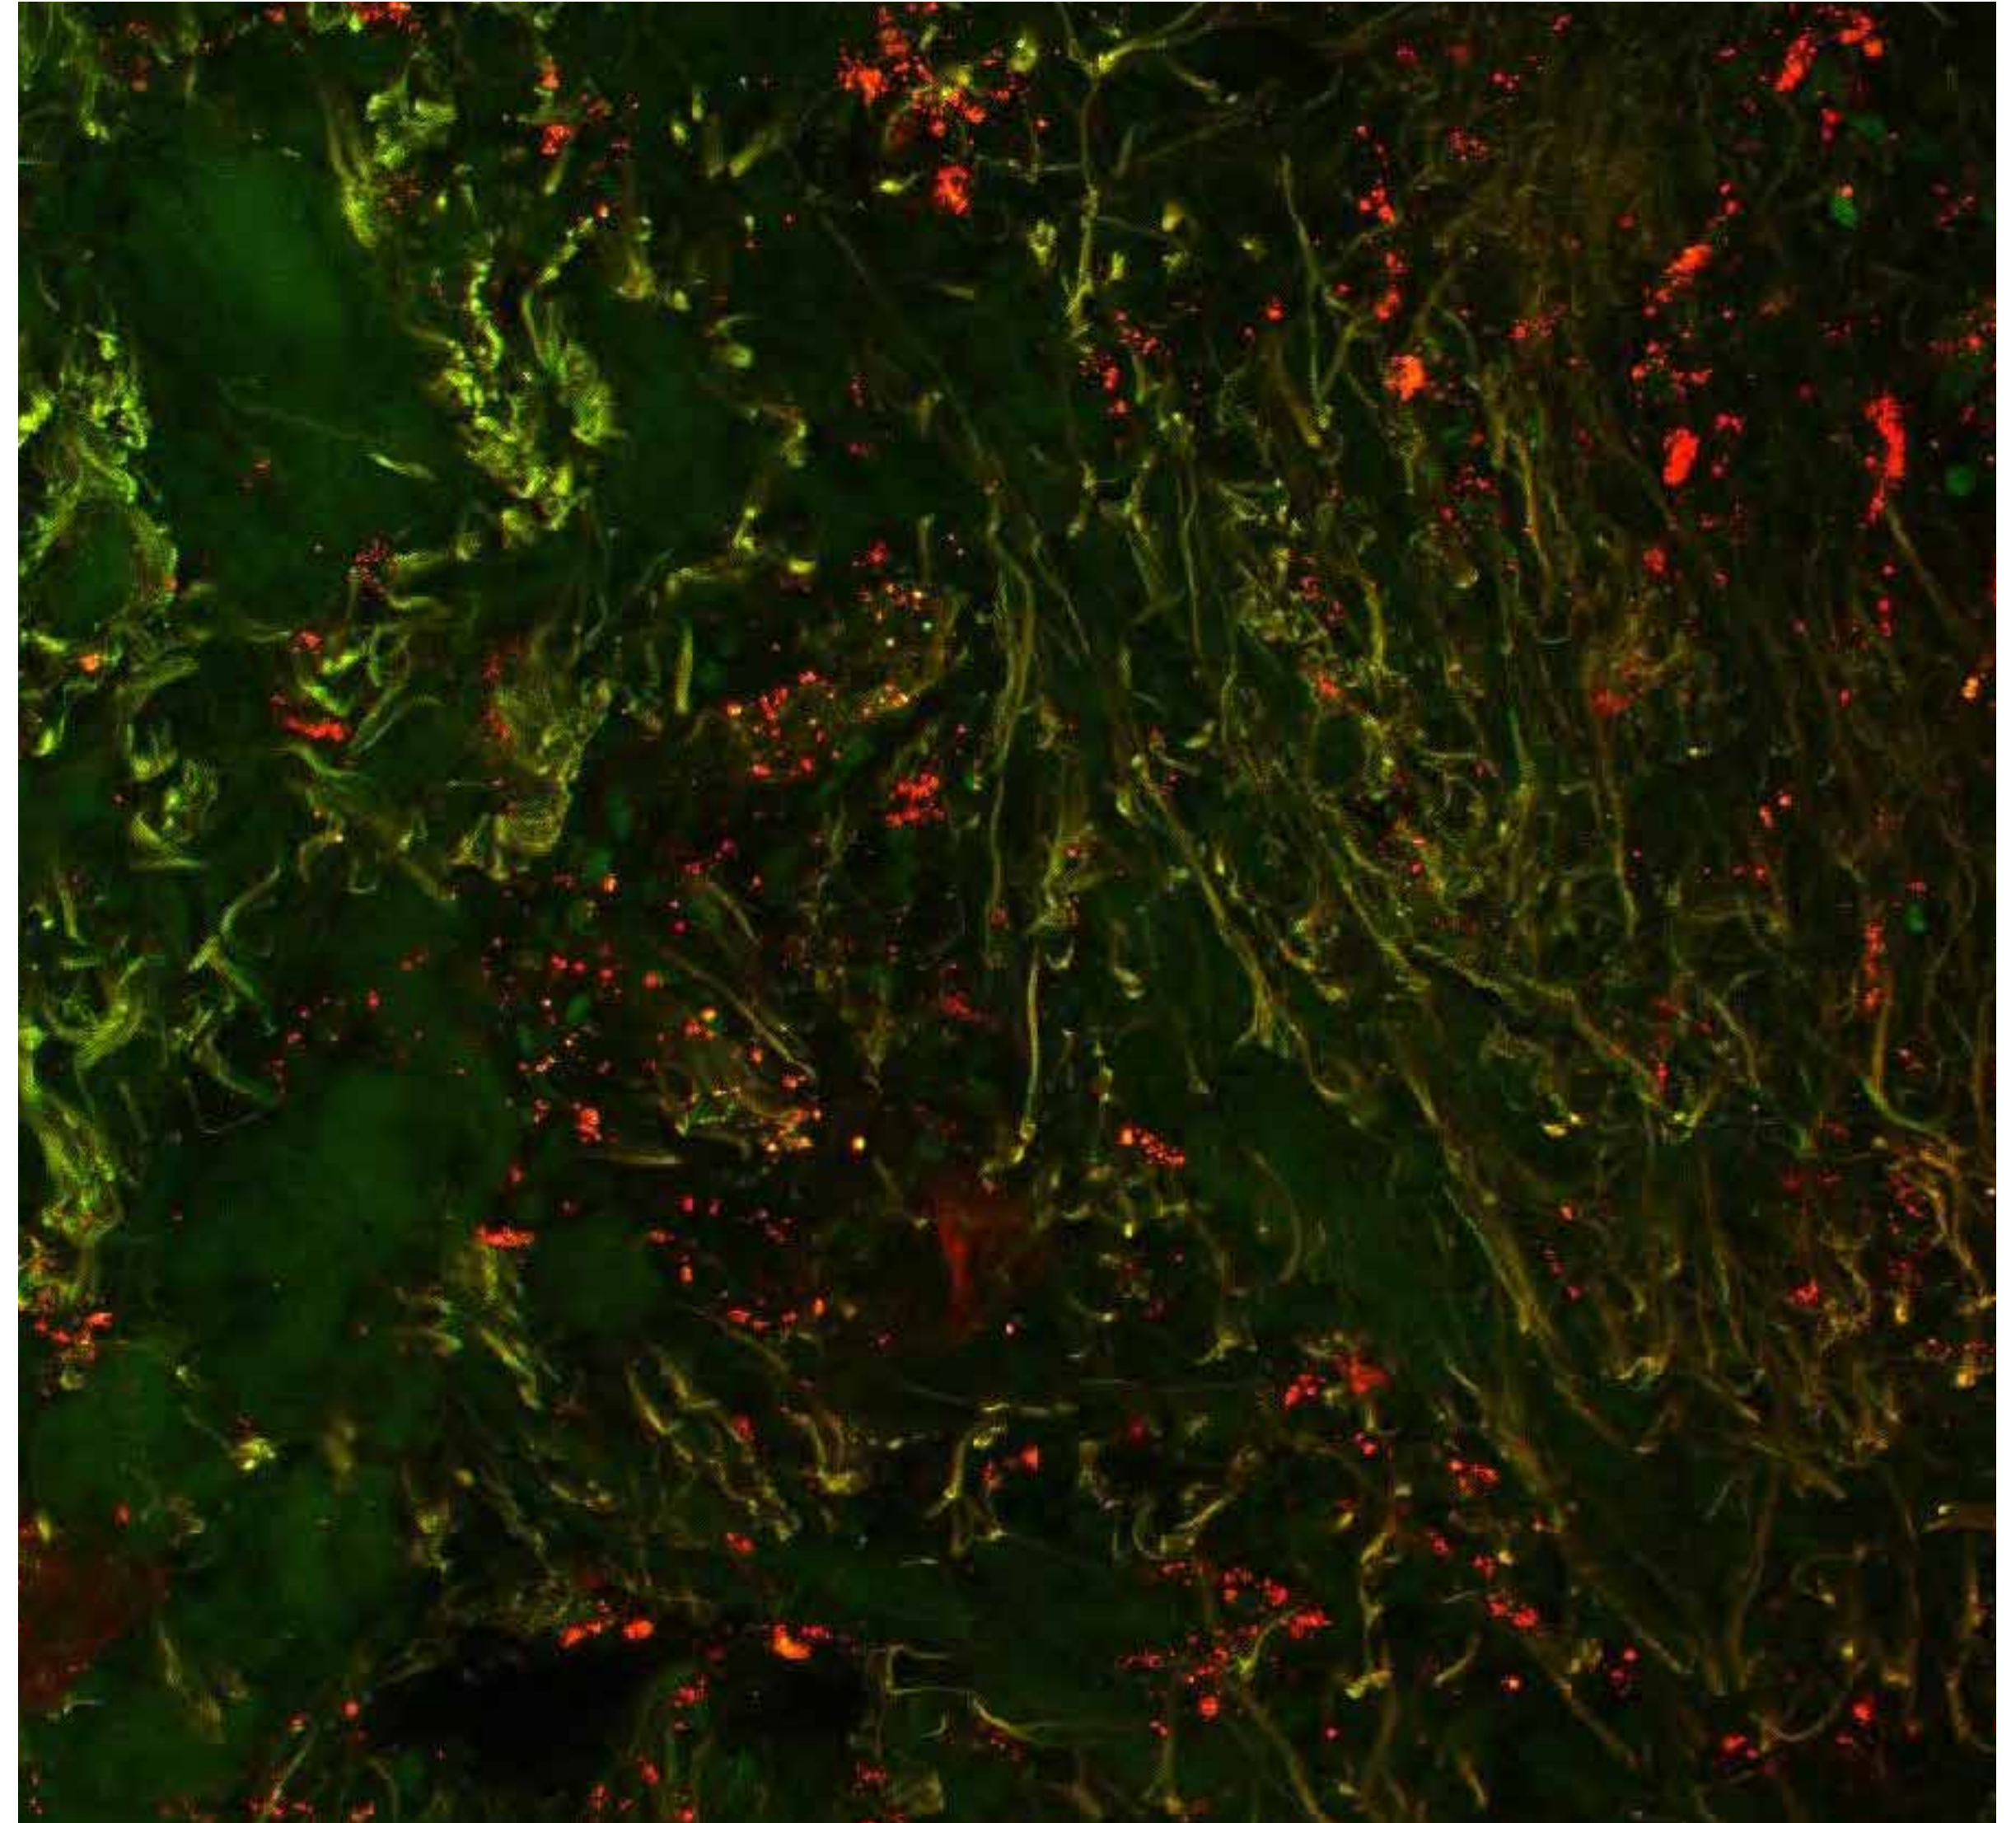

PARPi-FL (green) + Autofluorescence (red/yellow)



2225

Close-up

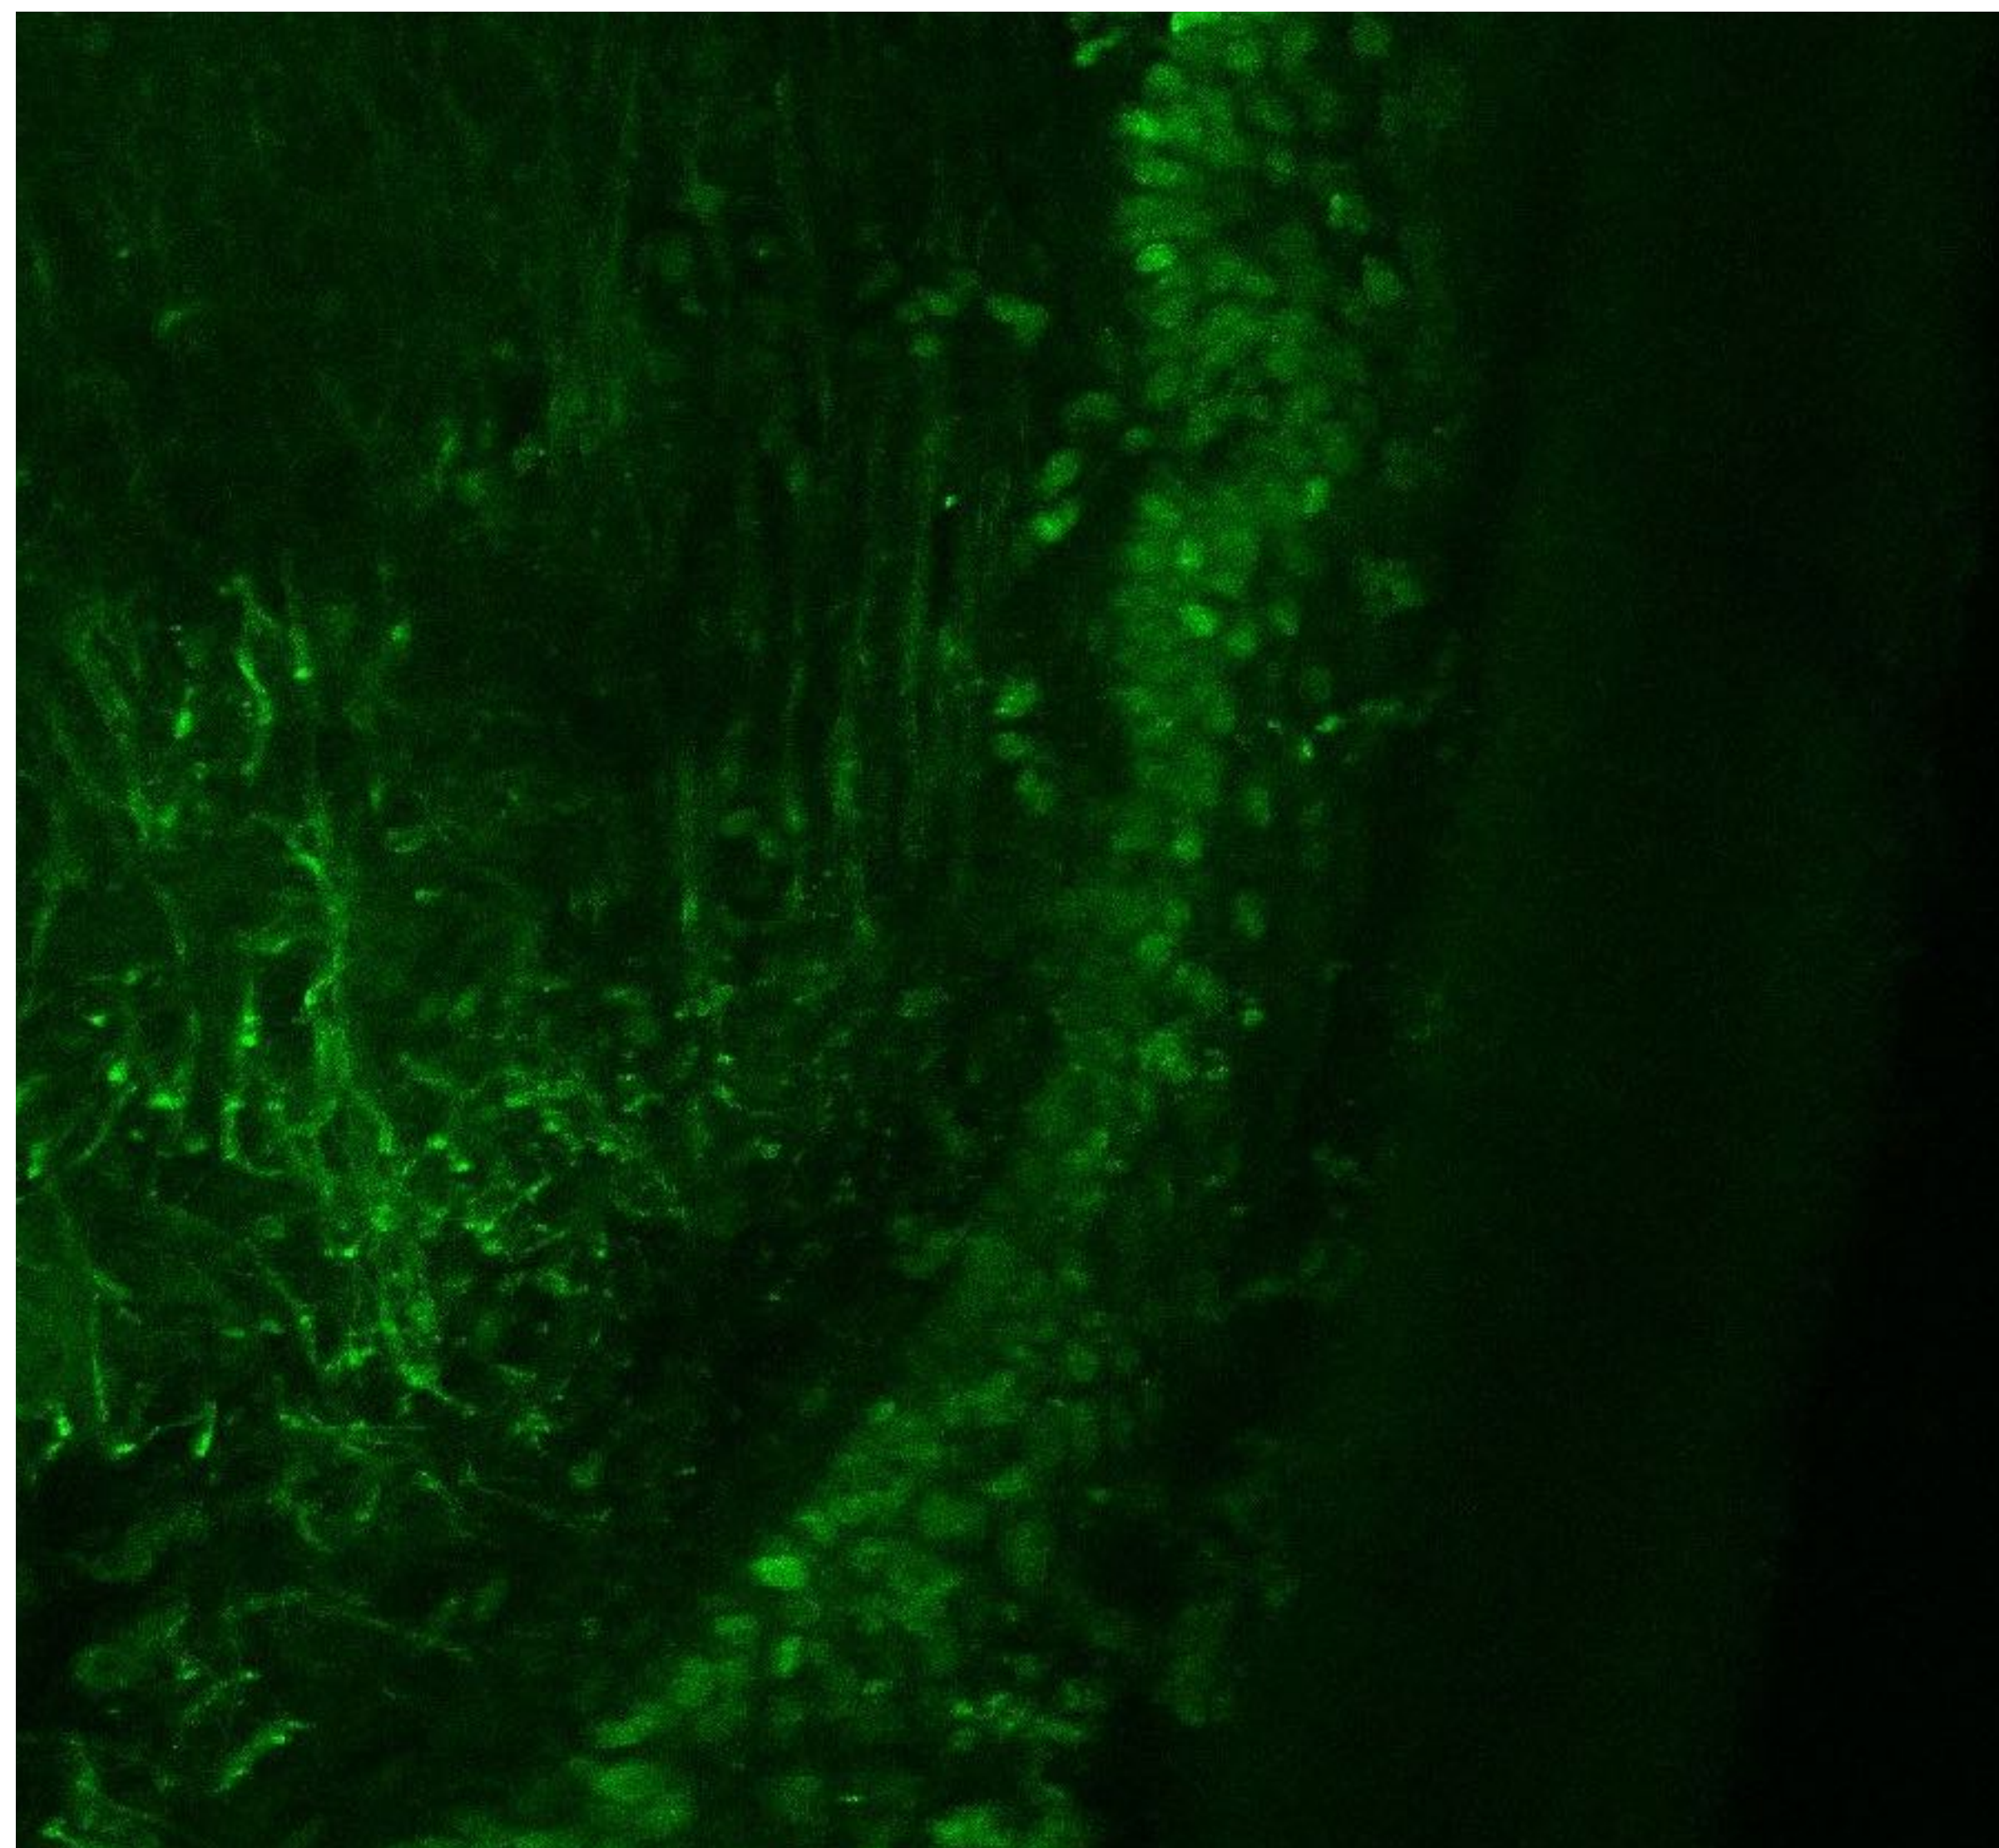

PARPi-FL only (green)

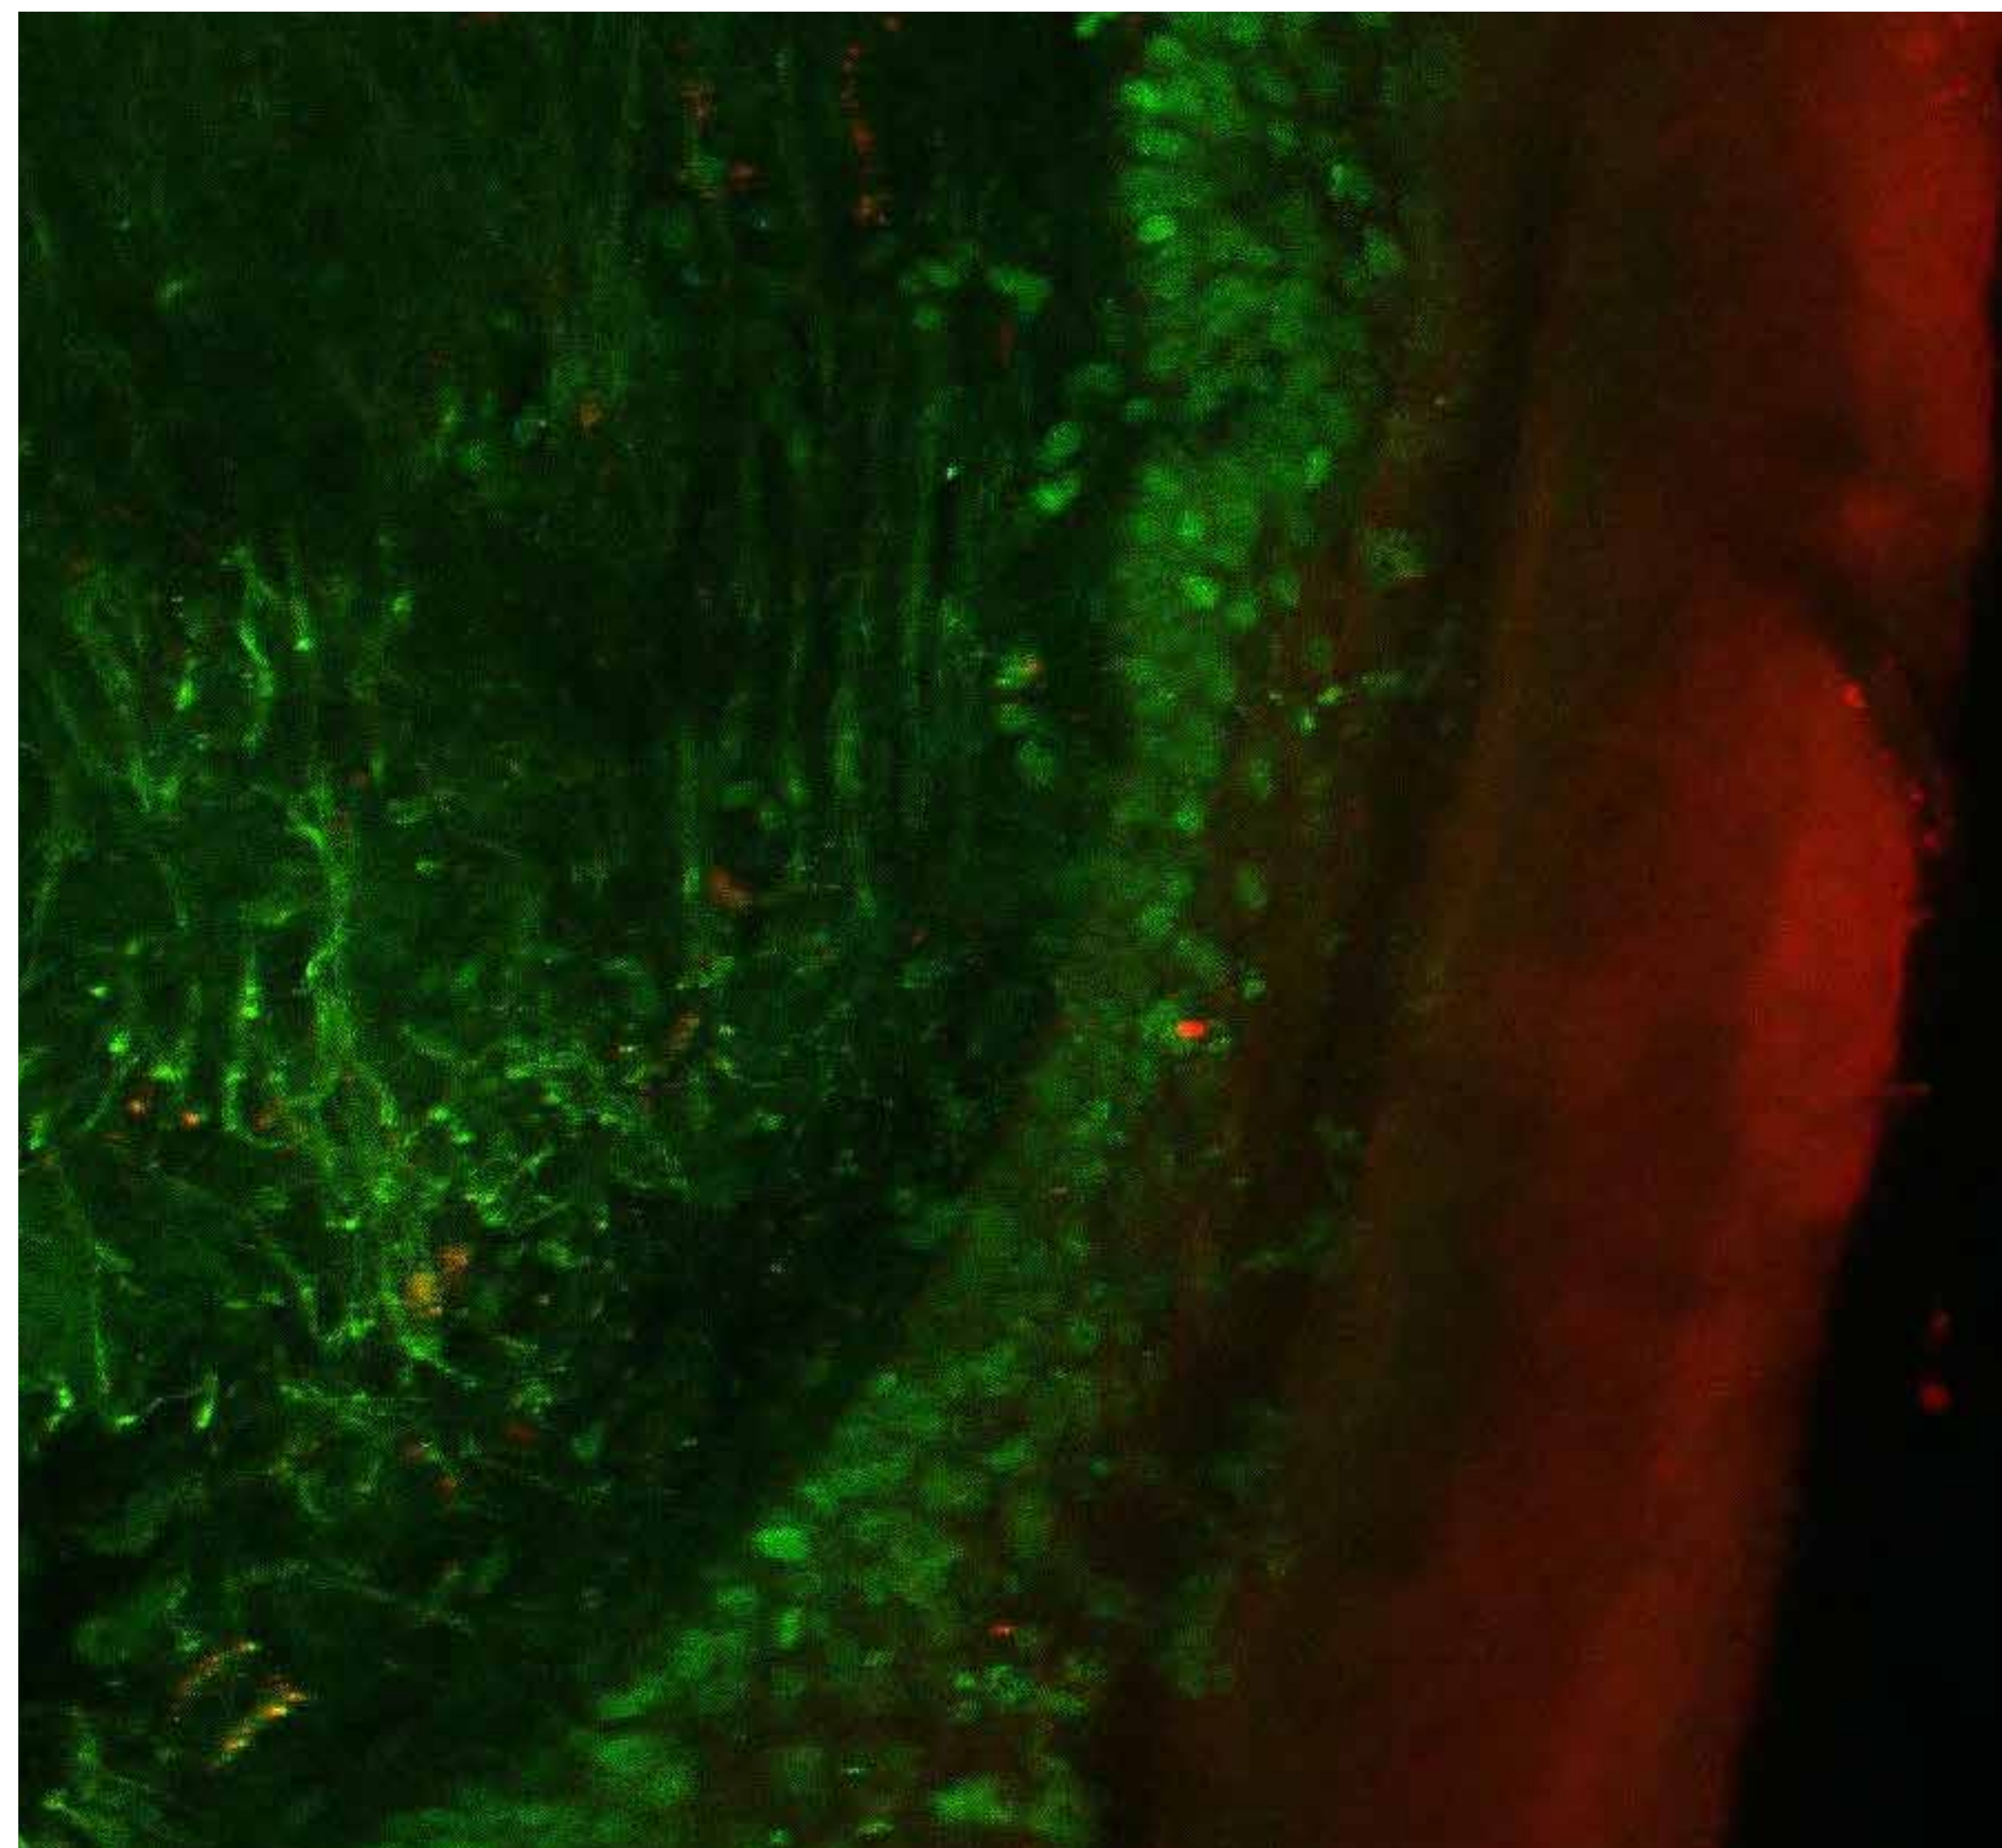

PARPi-FL (green) + Autofluorescence (red/yellow)



2225

10

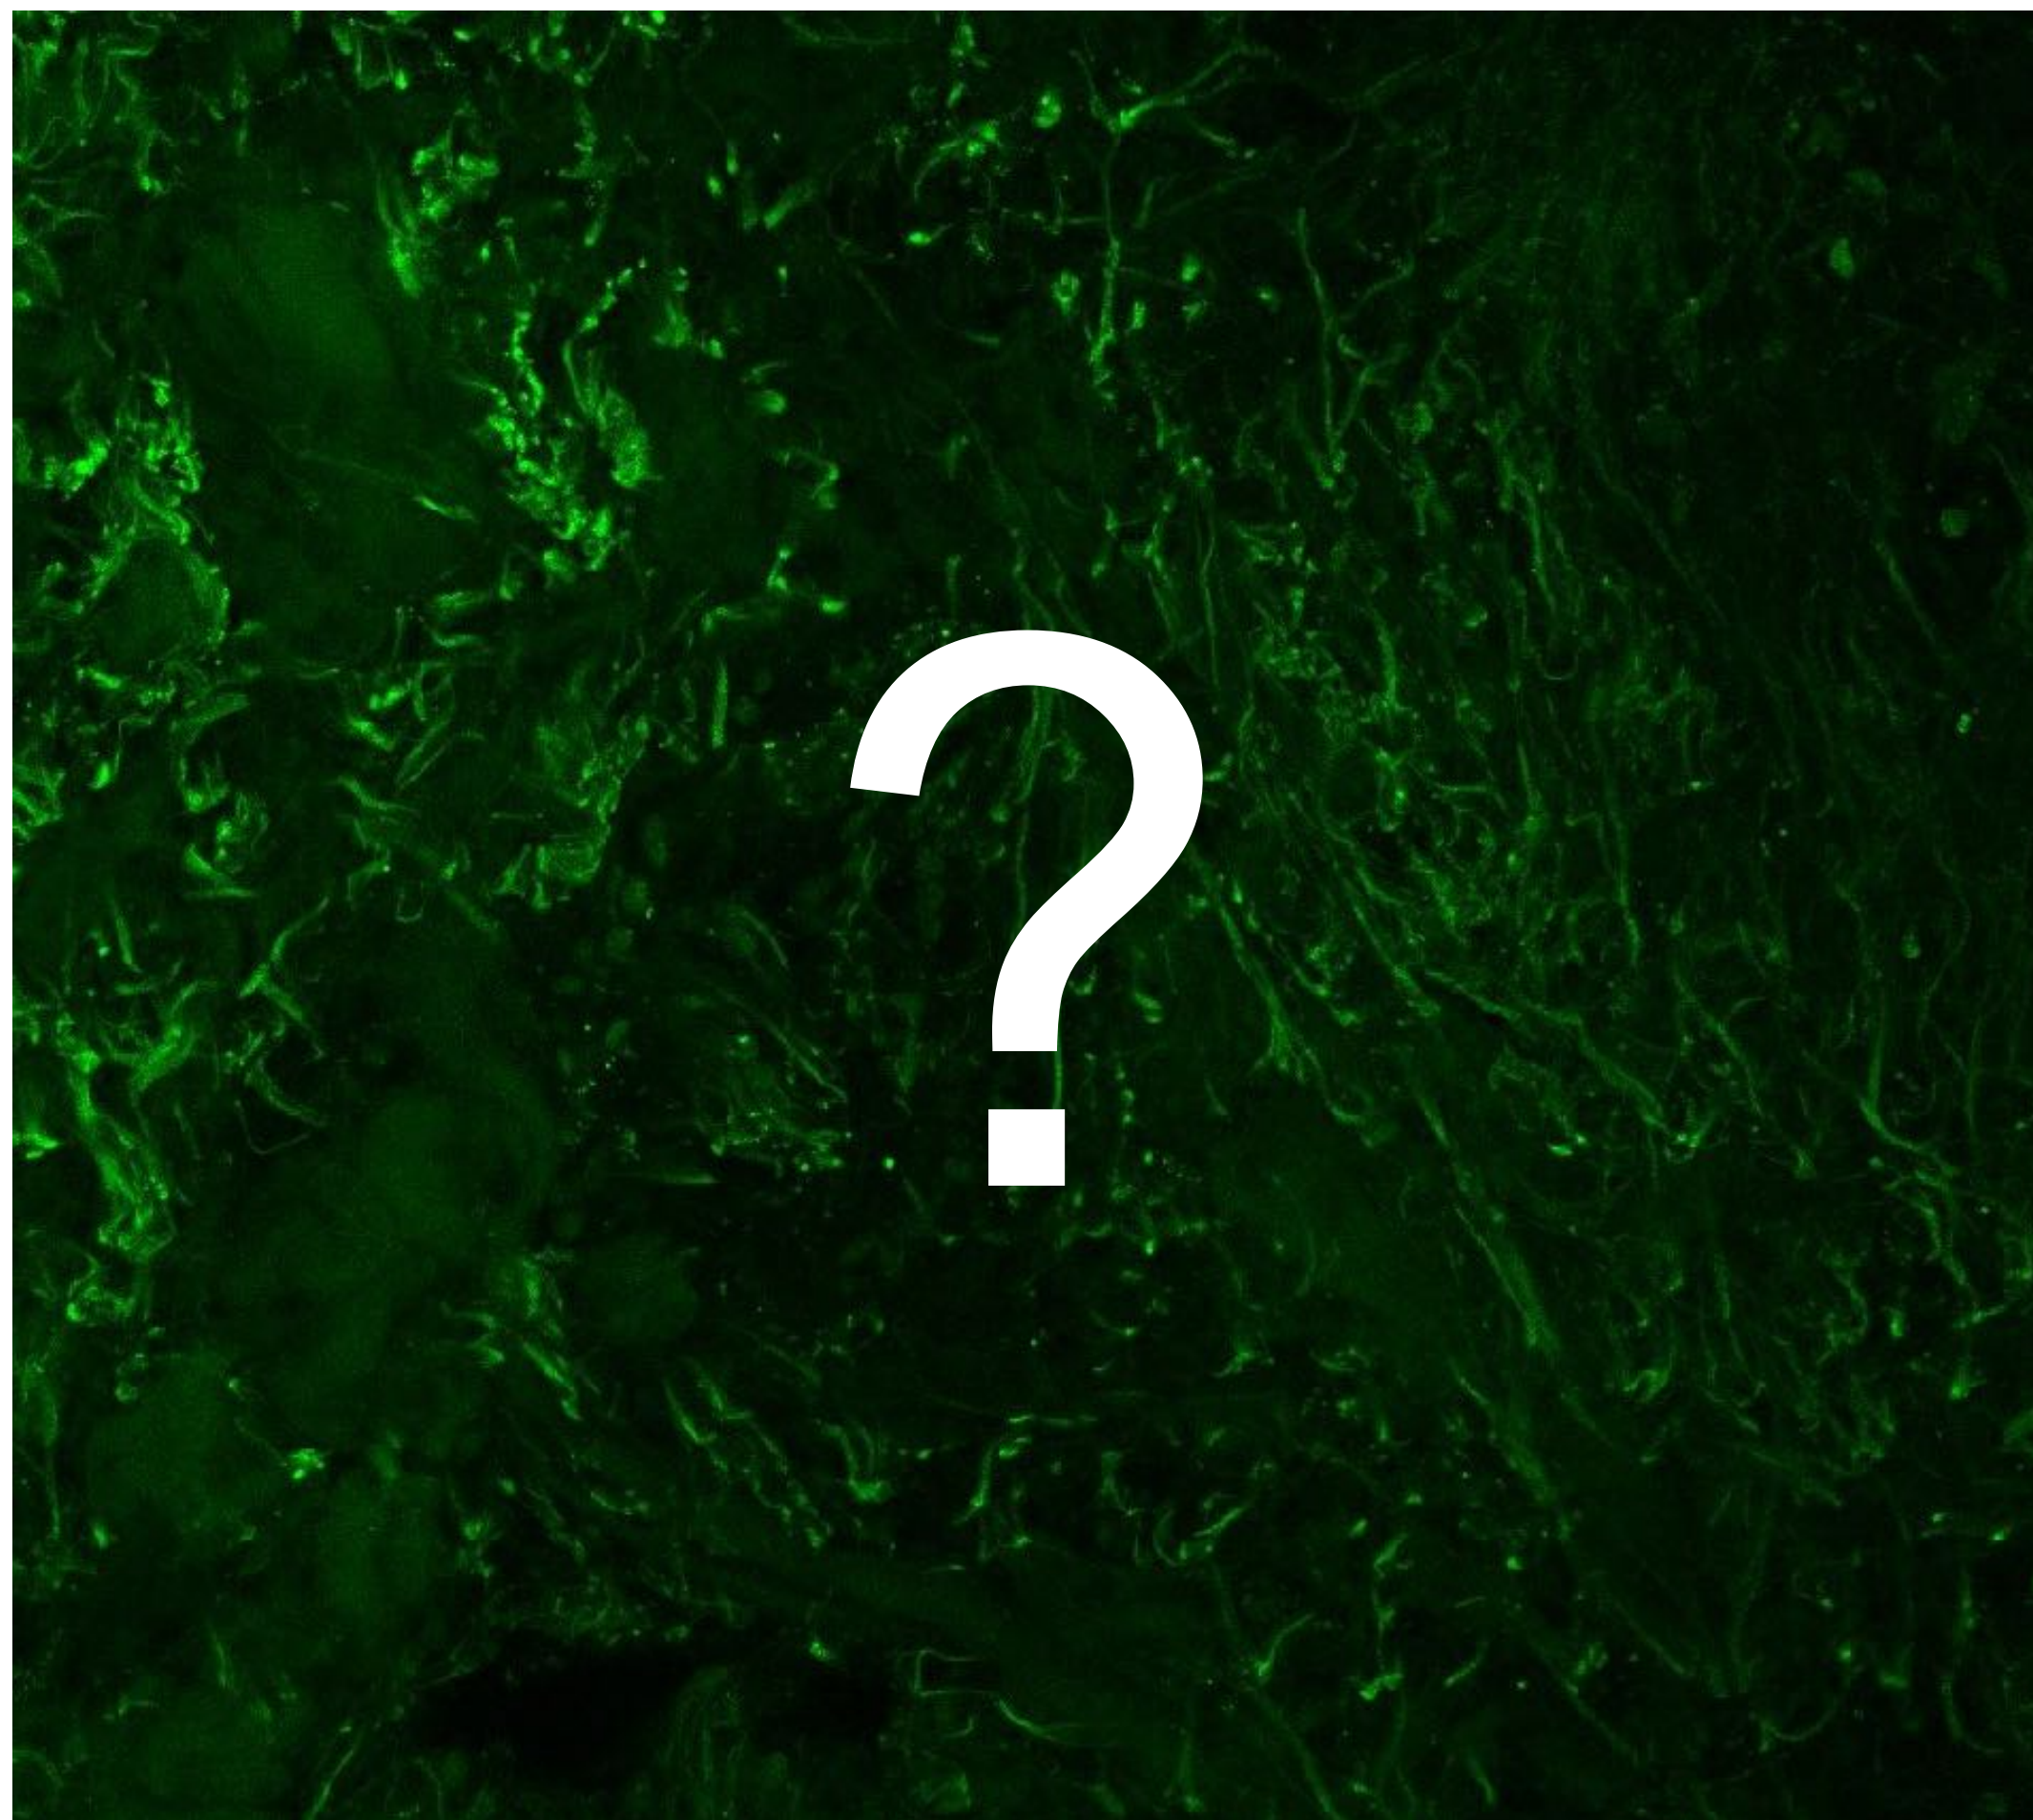

Tumor

Margin



2627

# Overview

Not available

Not available

PARPi-FL only (green)

PARPi-FL (green) + Autofluorescence (red/yellow)



2627

Close-up

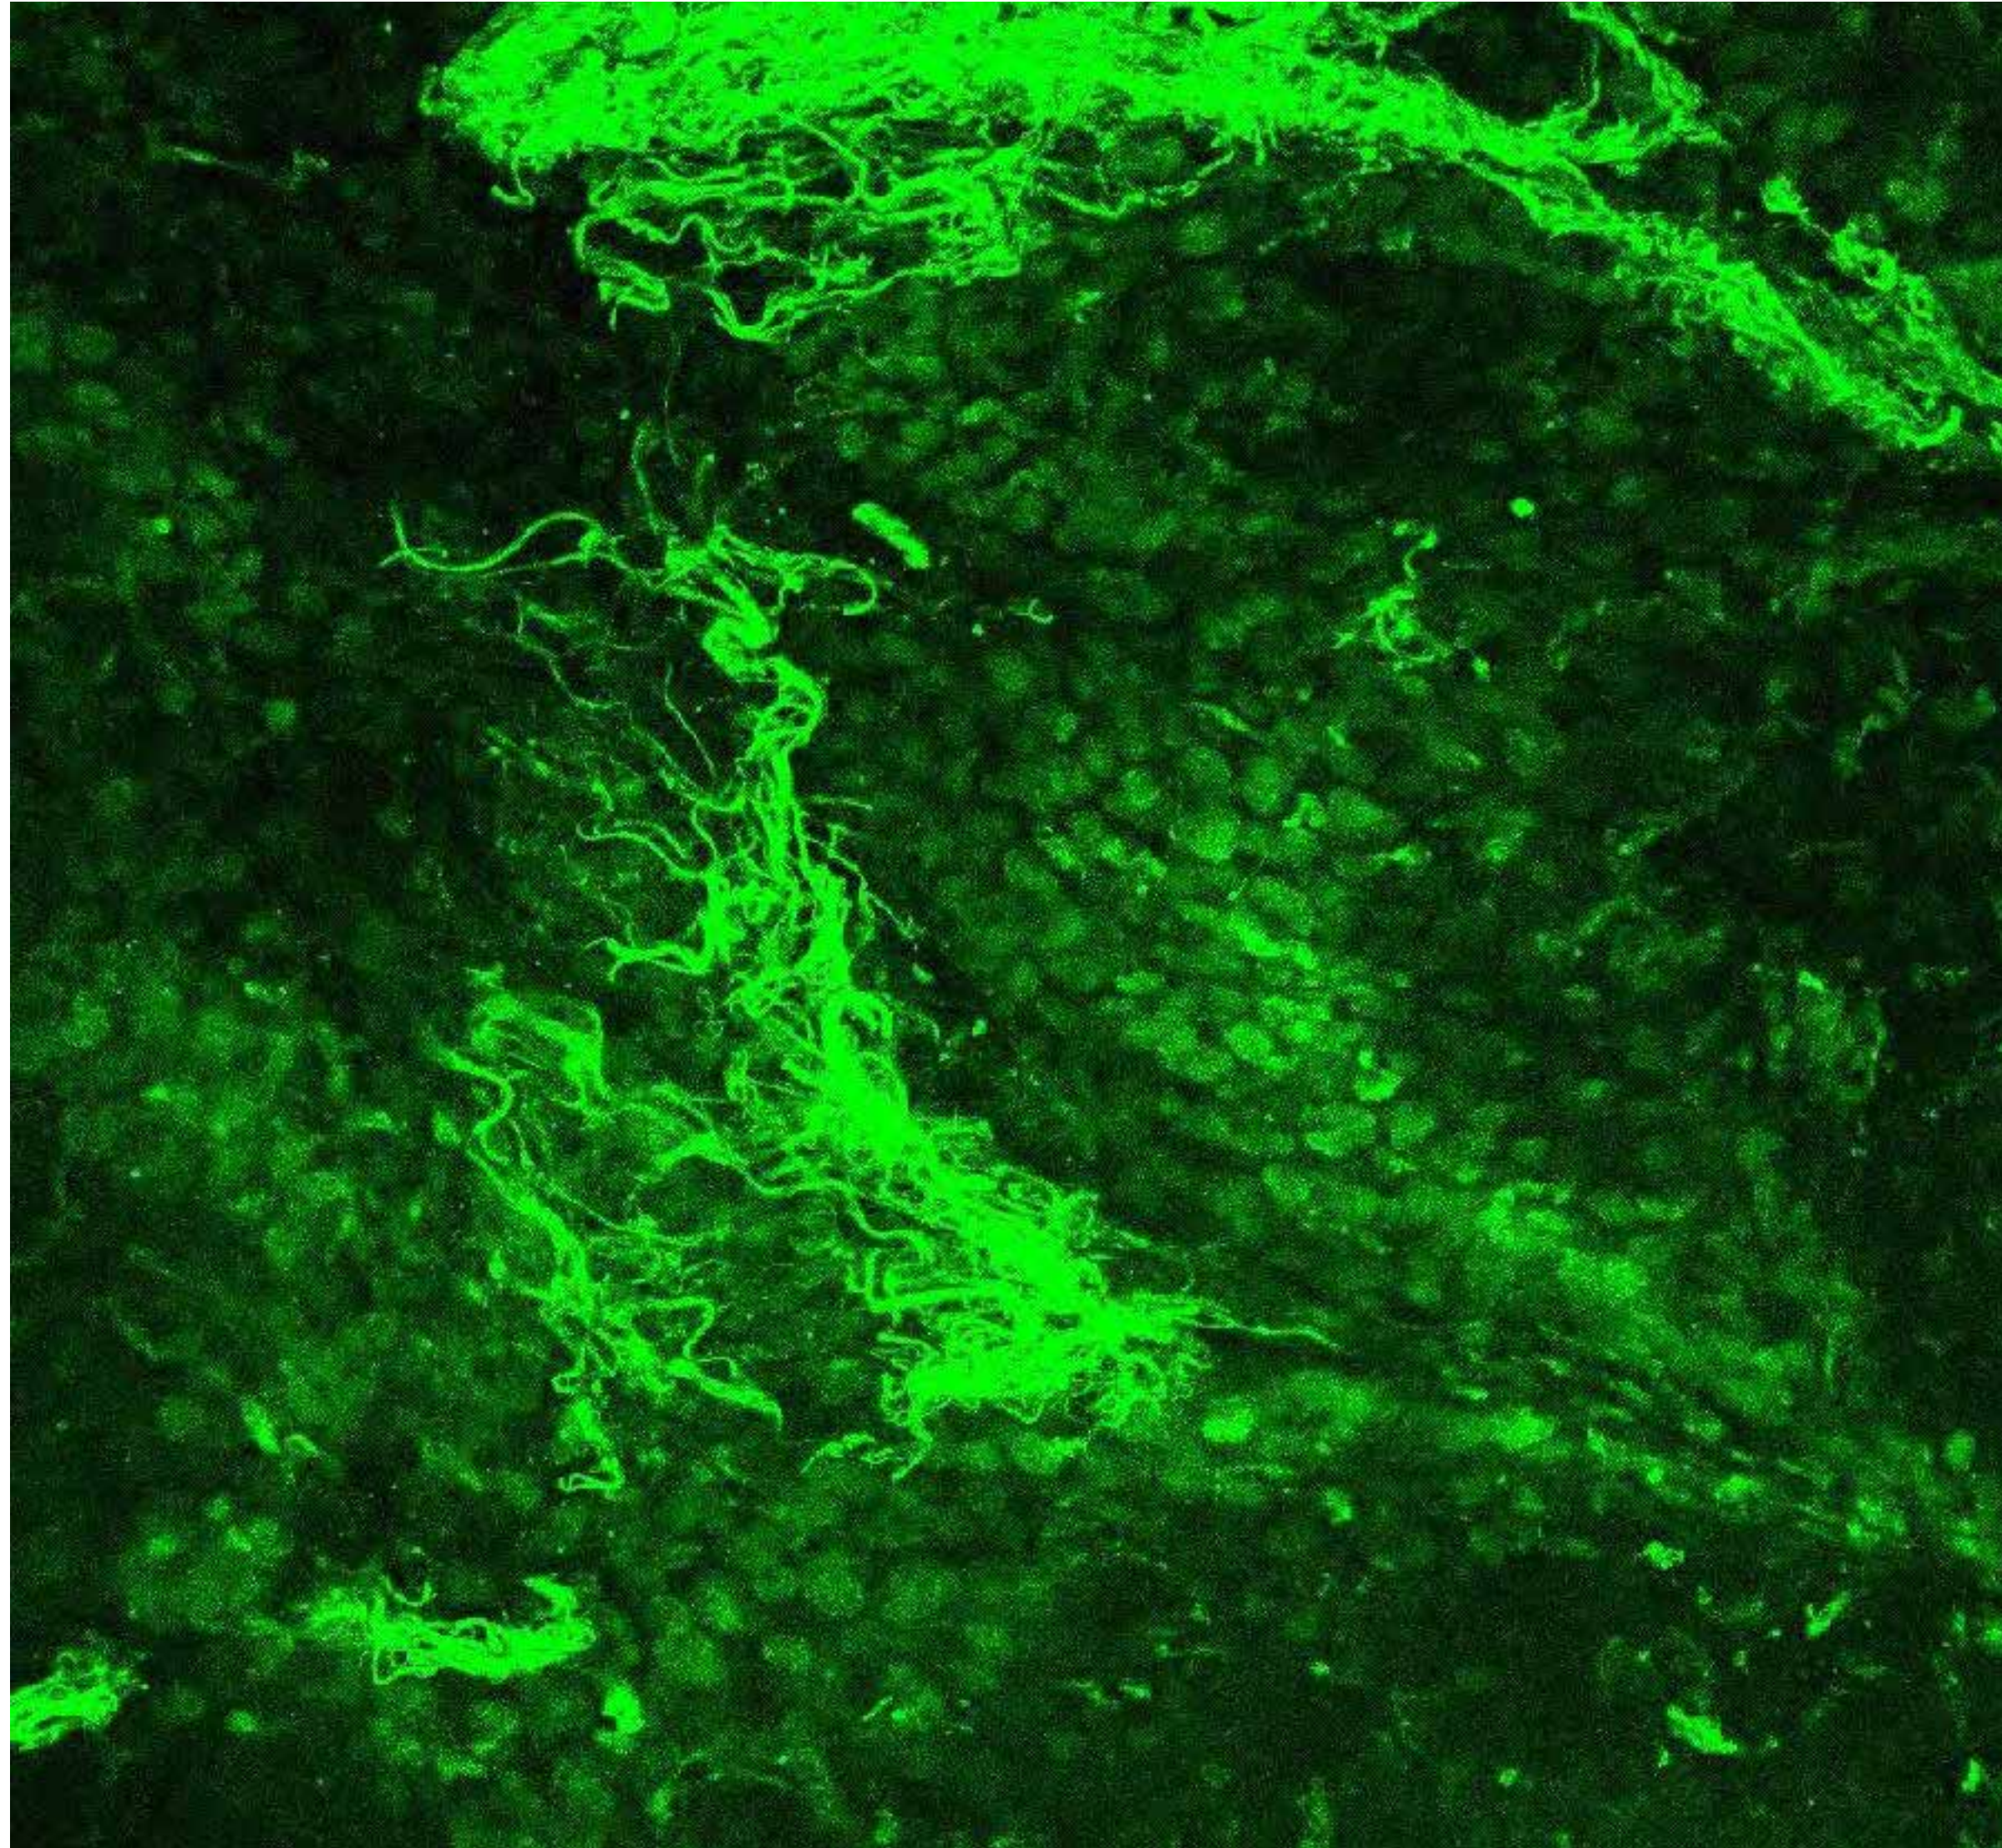

Not available

PARPi-FL only (green)

PARPi-FL (green) + Autofluorescence (red/yellow)



2627

Close-up

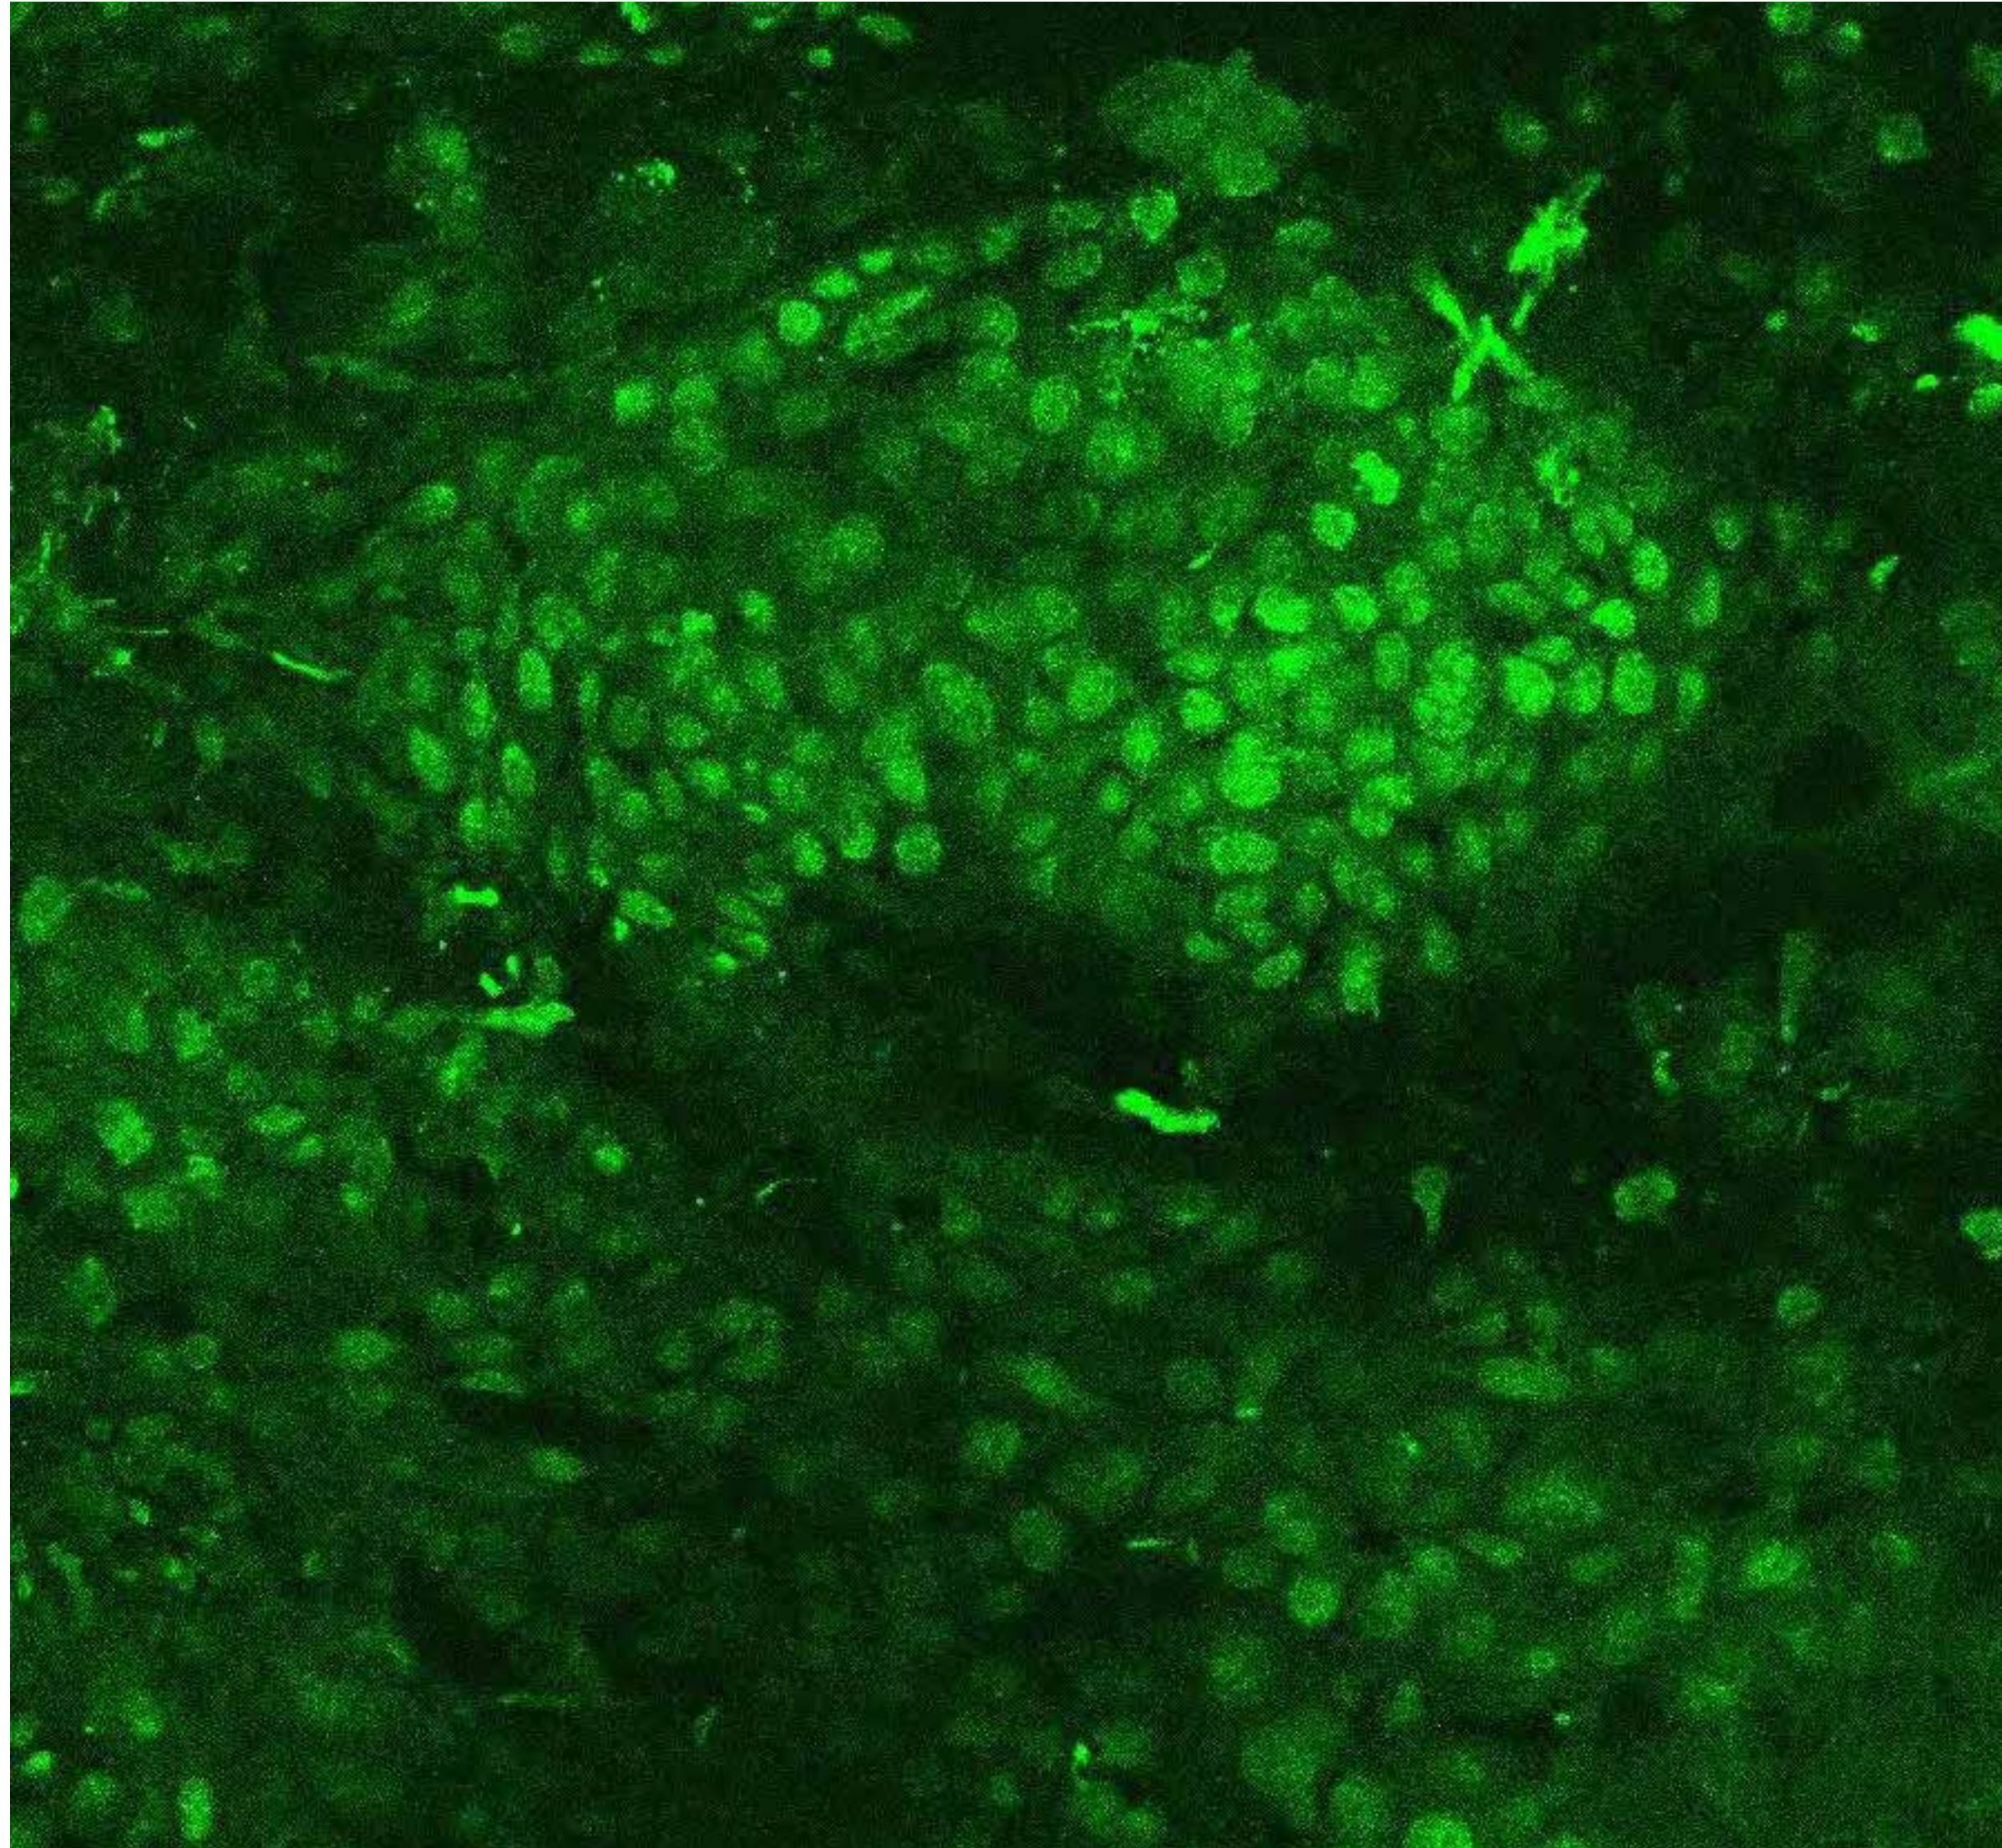

Not available

PARPi-FL only (green)

PARPi-FL (green) + Autofluorescence (red/yellow)



2627

Close-up

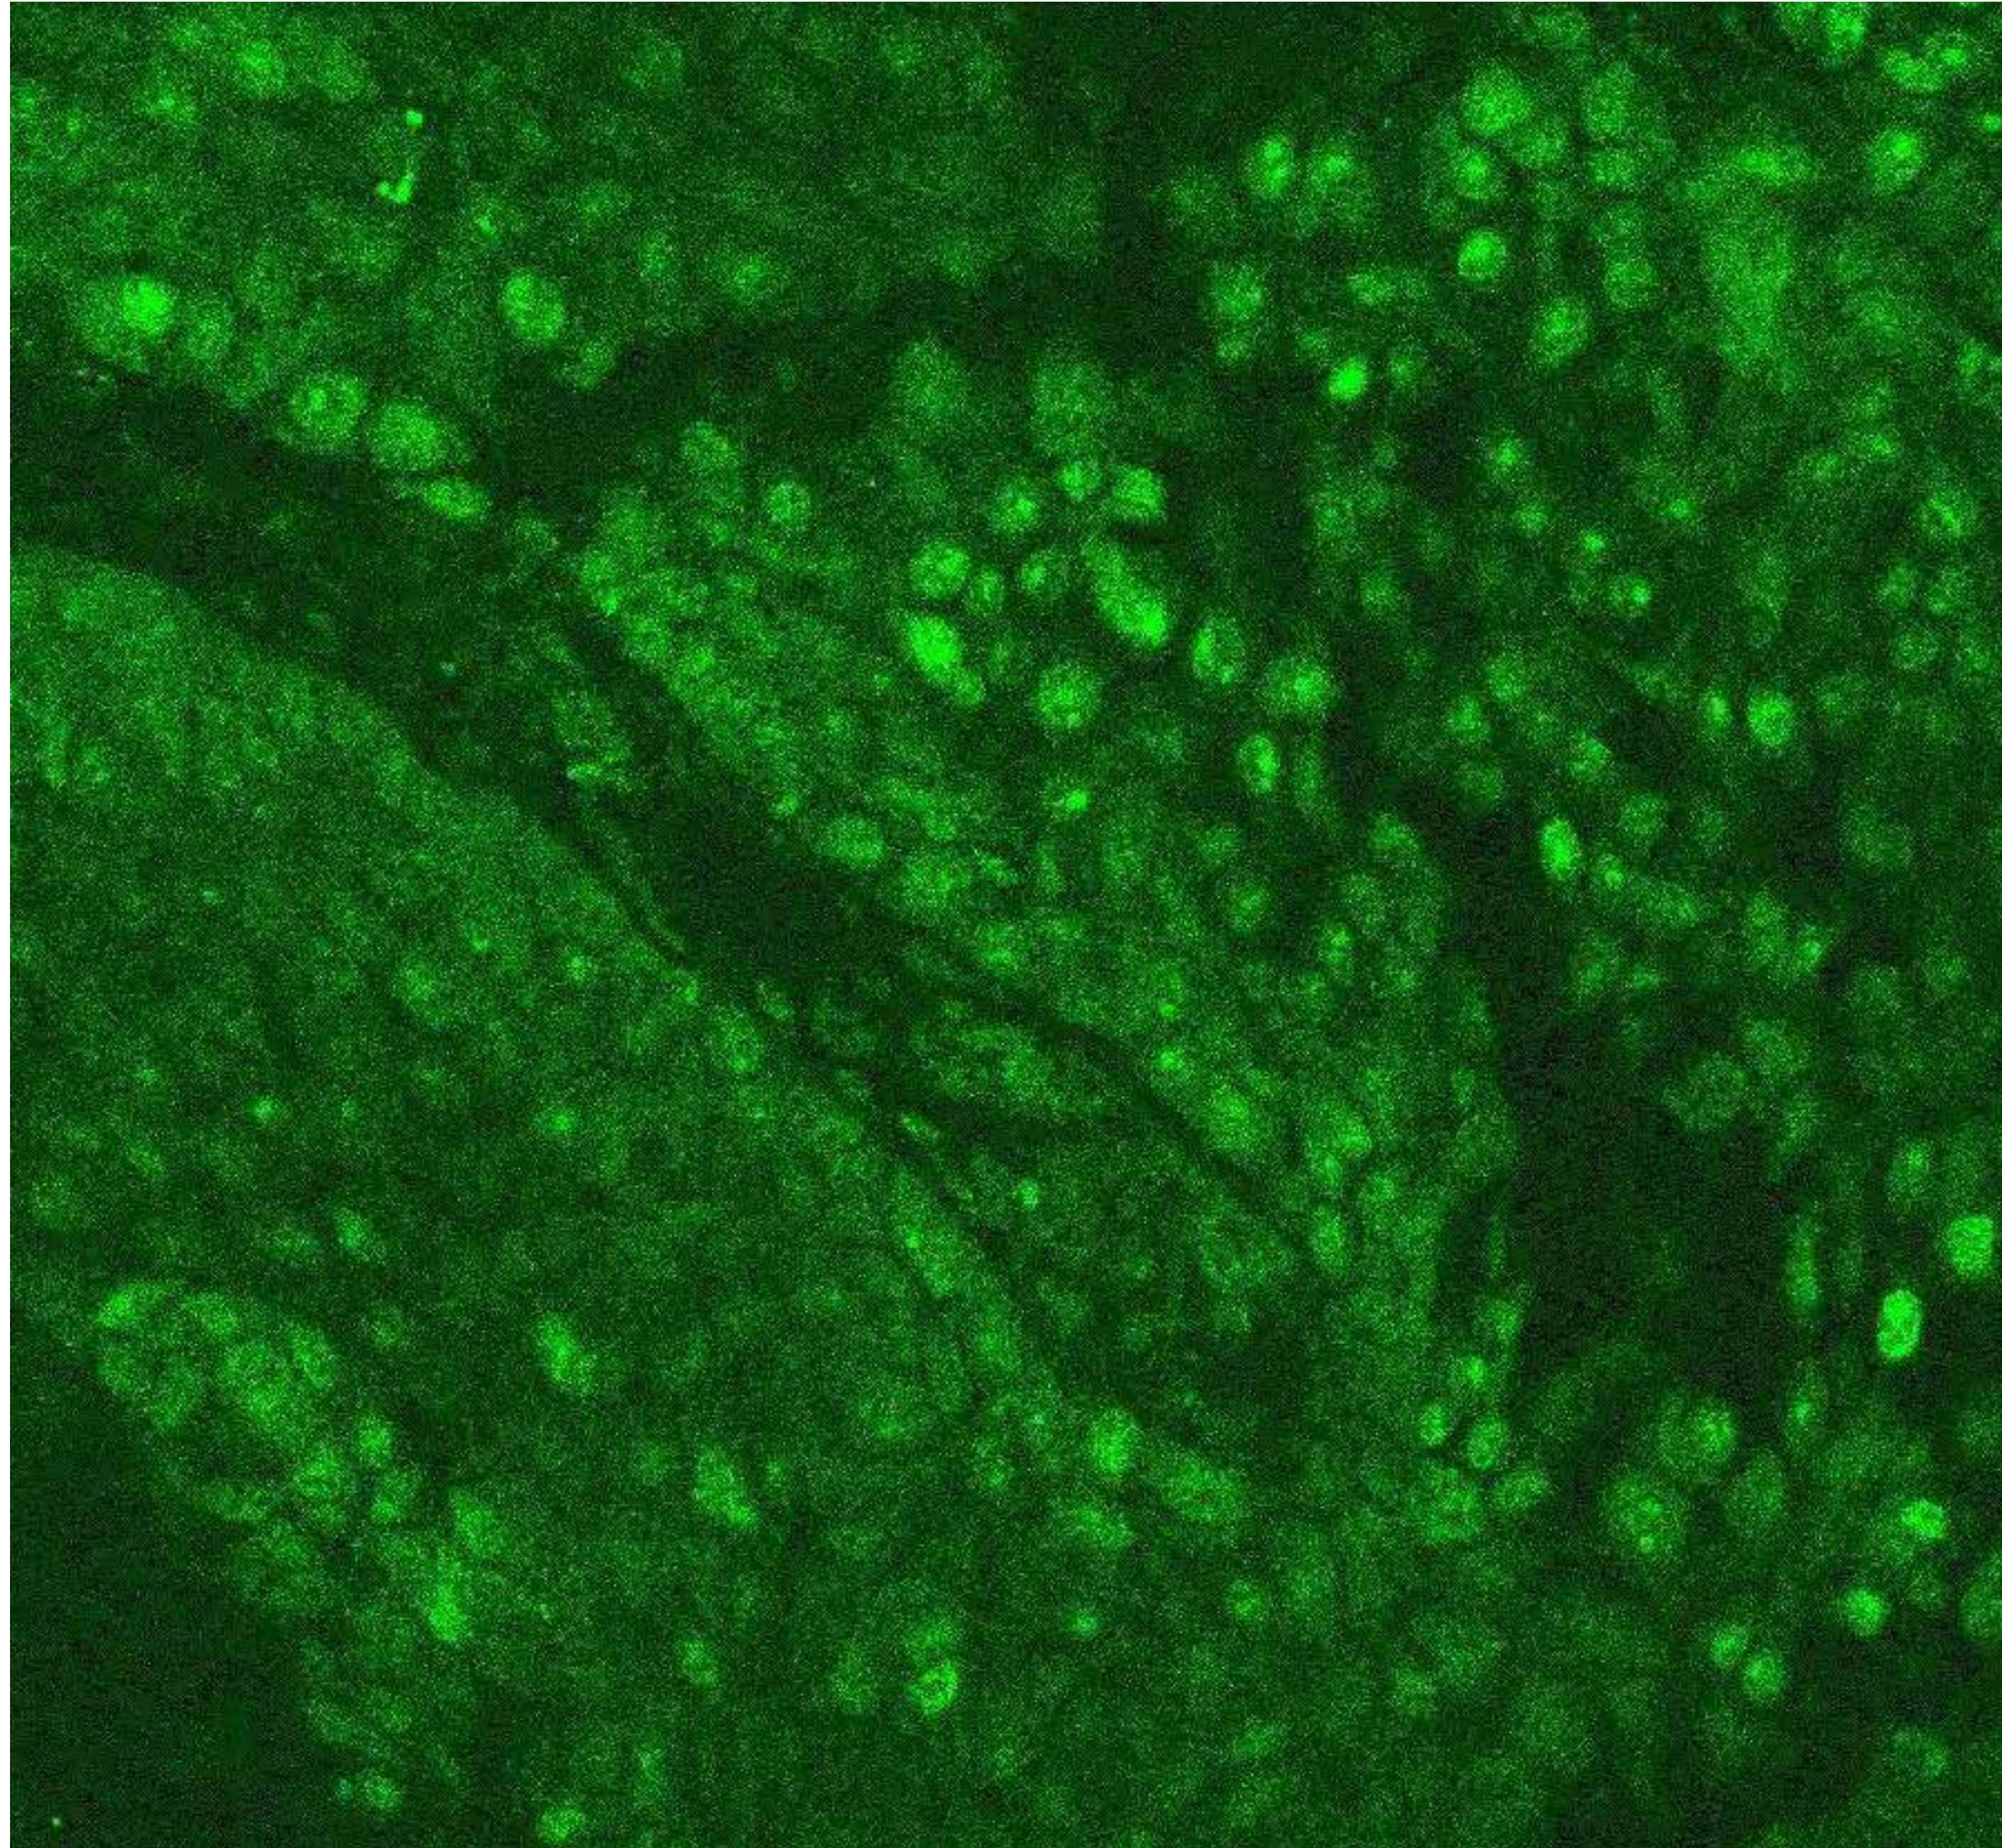

Not available

PARPi-FL only (green)

PARPi-FL (green) + Autofluorescence (red/yellow)



2627

Close-up

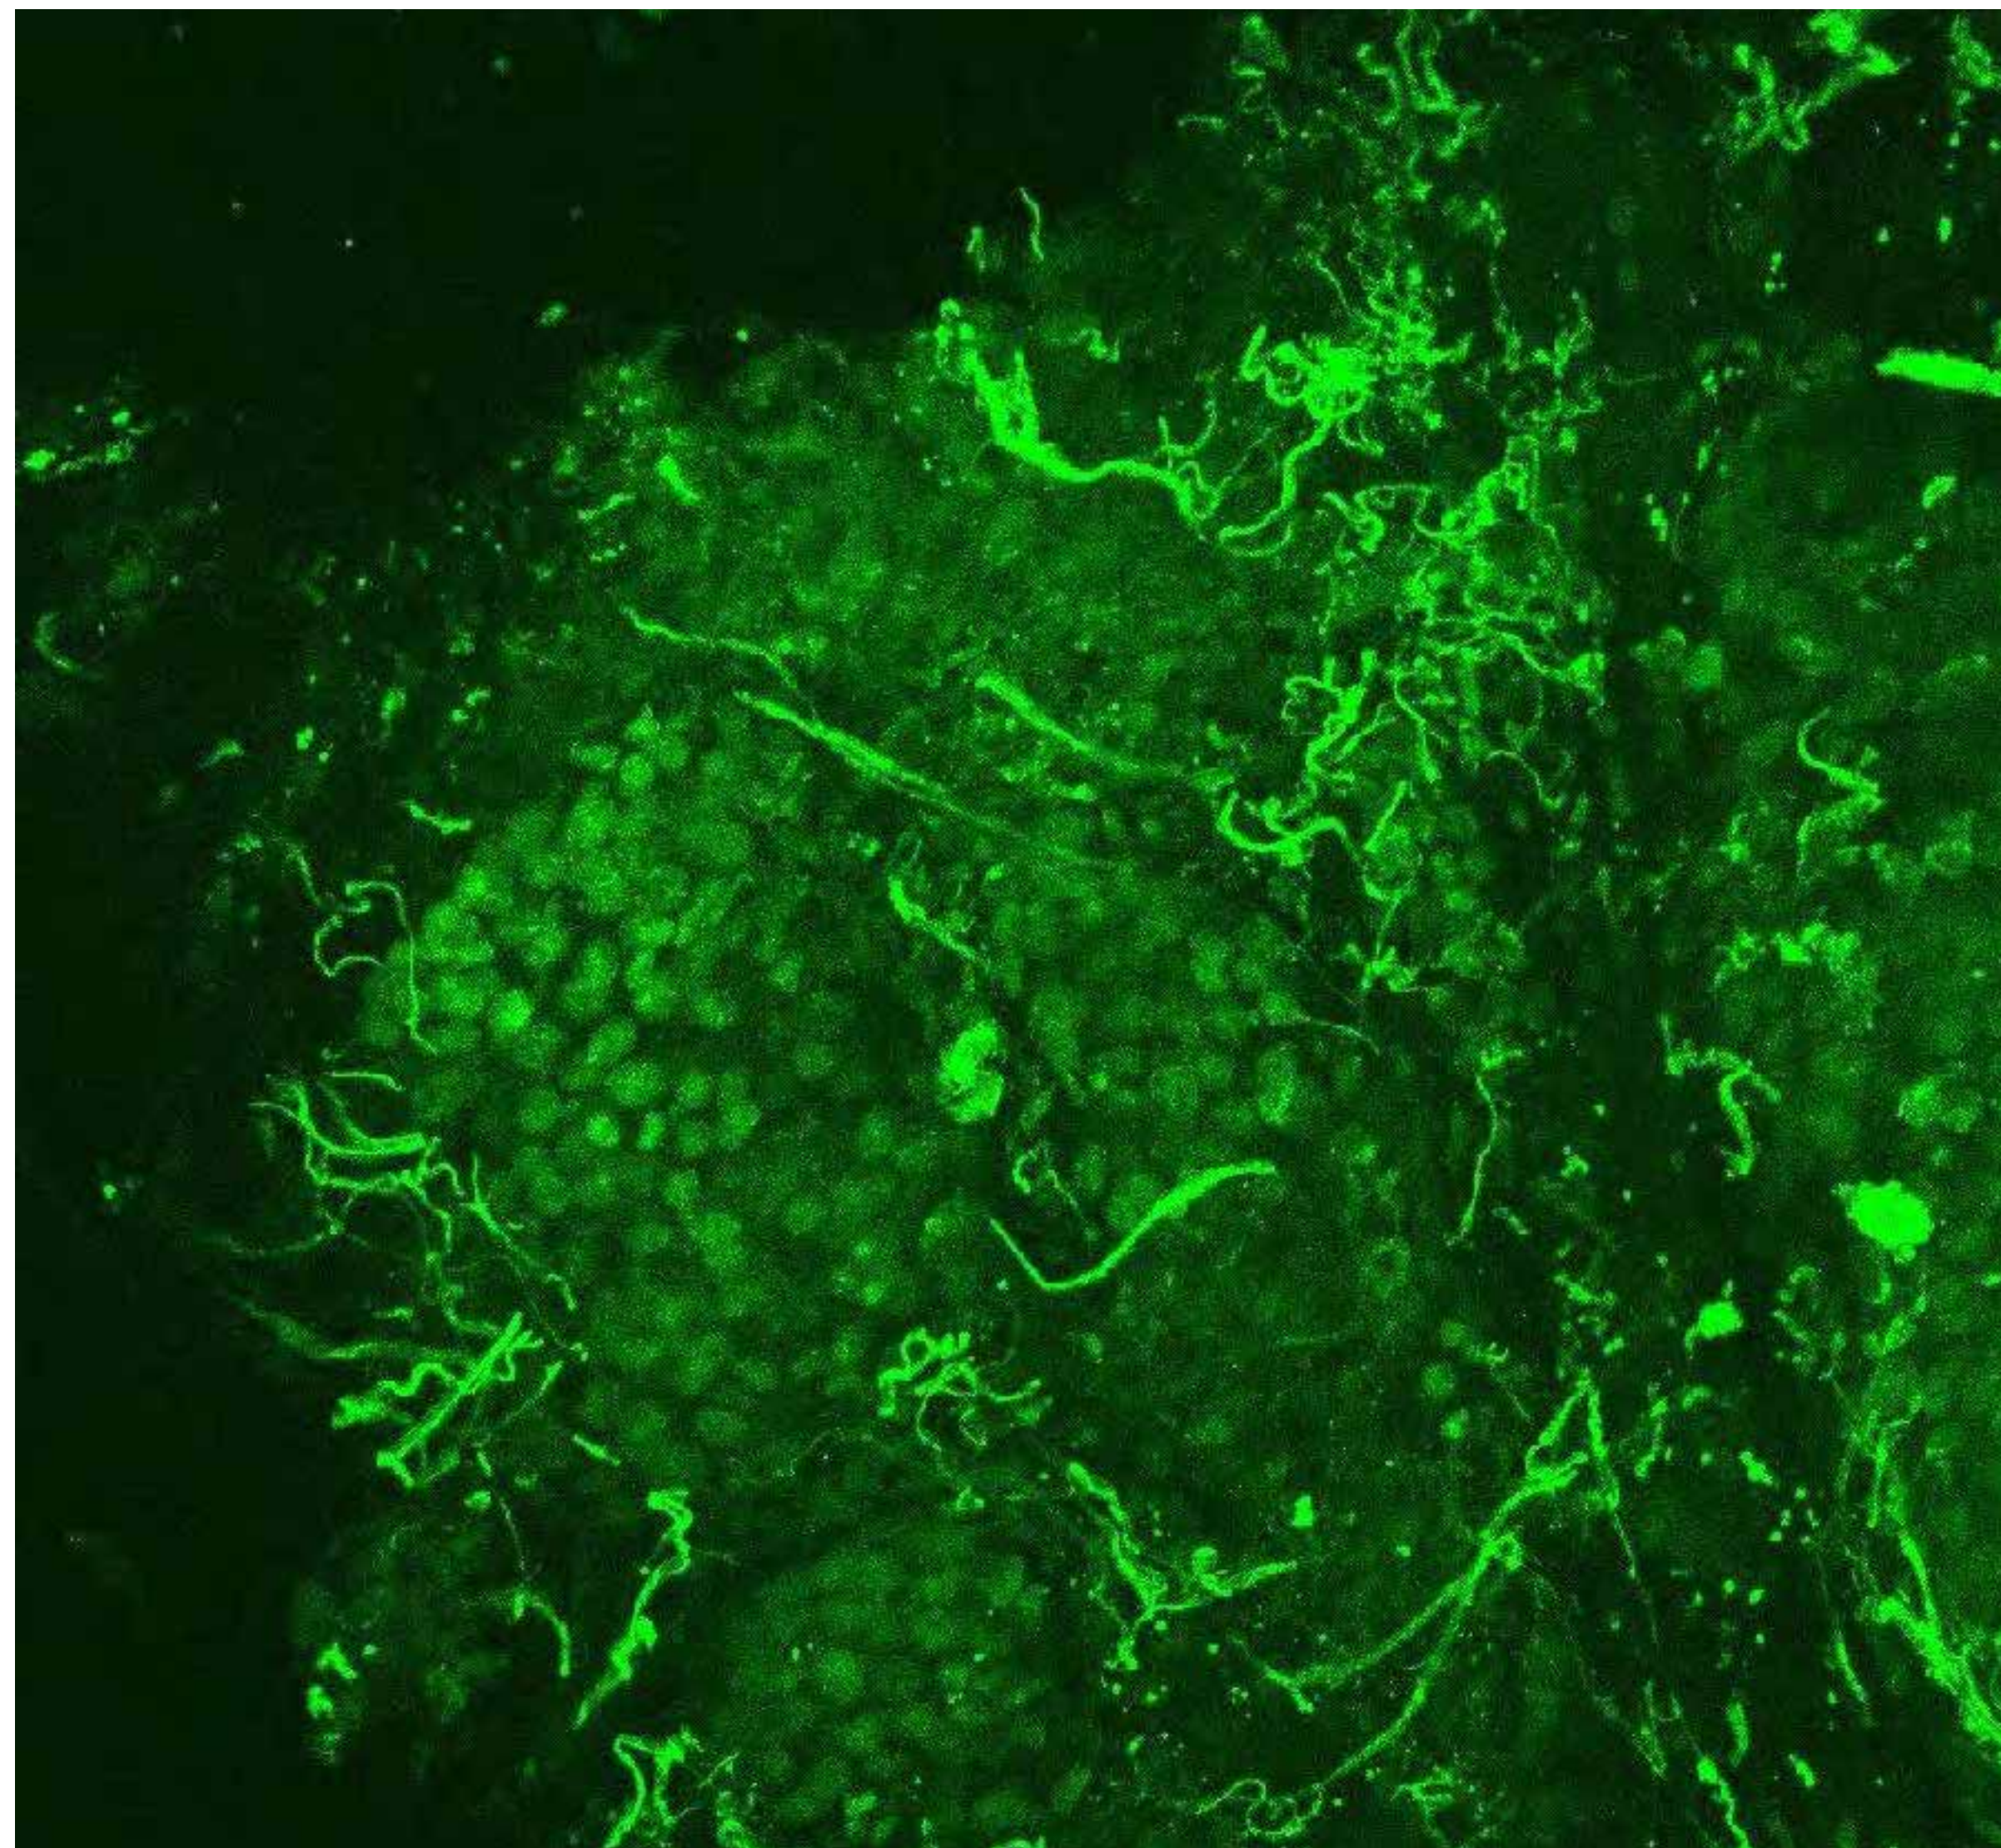

Not available

PARPi-FL only (green)

PARPi-FL (green) + Autofluorescence (red/yellow)



2627

Close-up

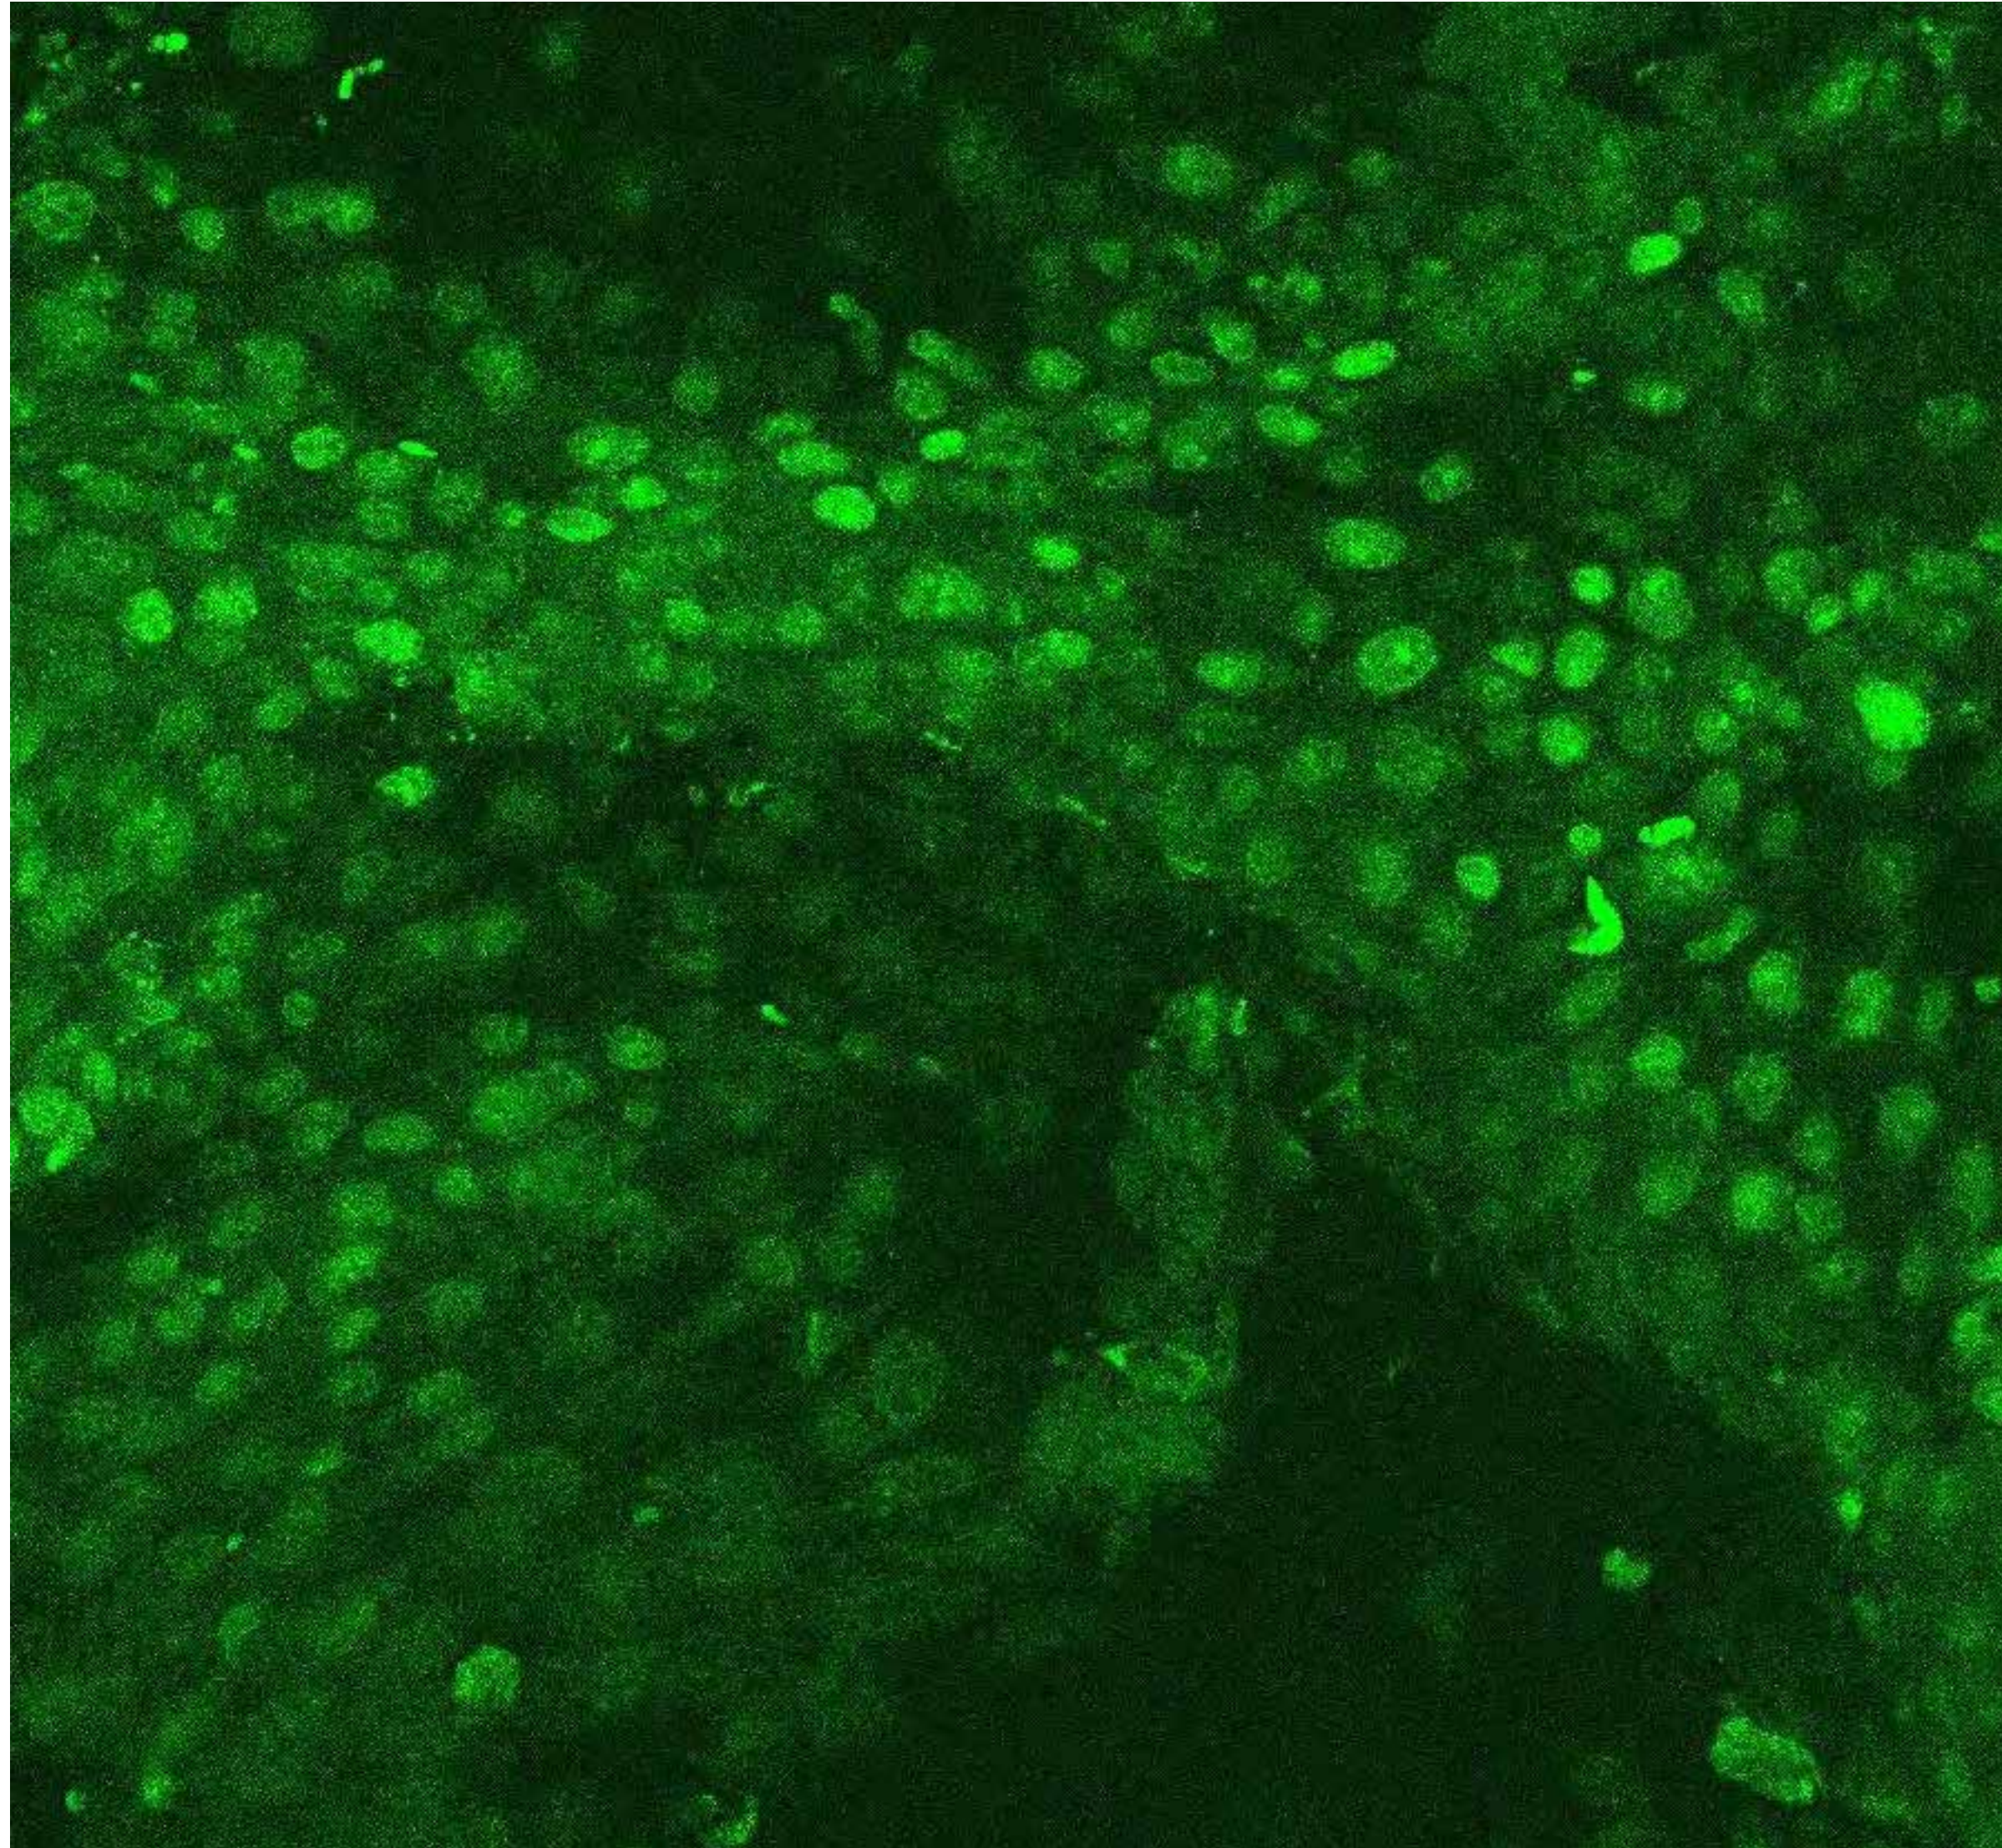

Not available

PARPi-FL only (green)

PARPi-FL (green) + Autofluorescence (red/yellow)



2627

10

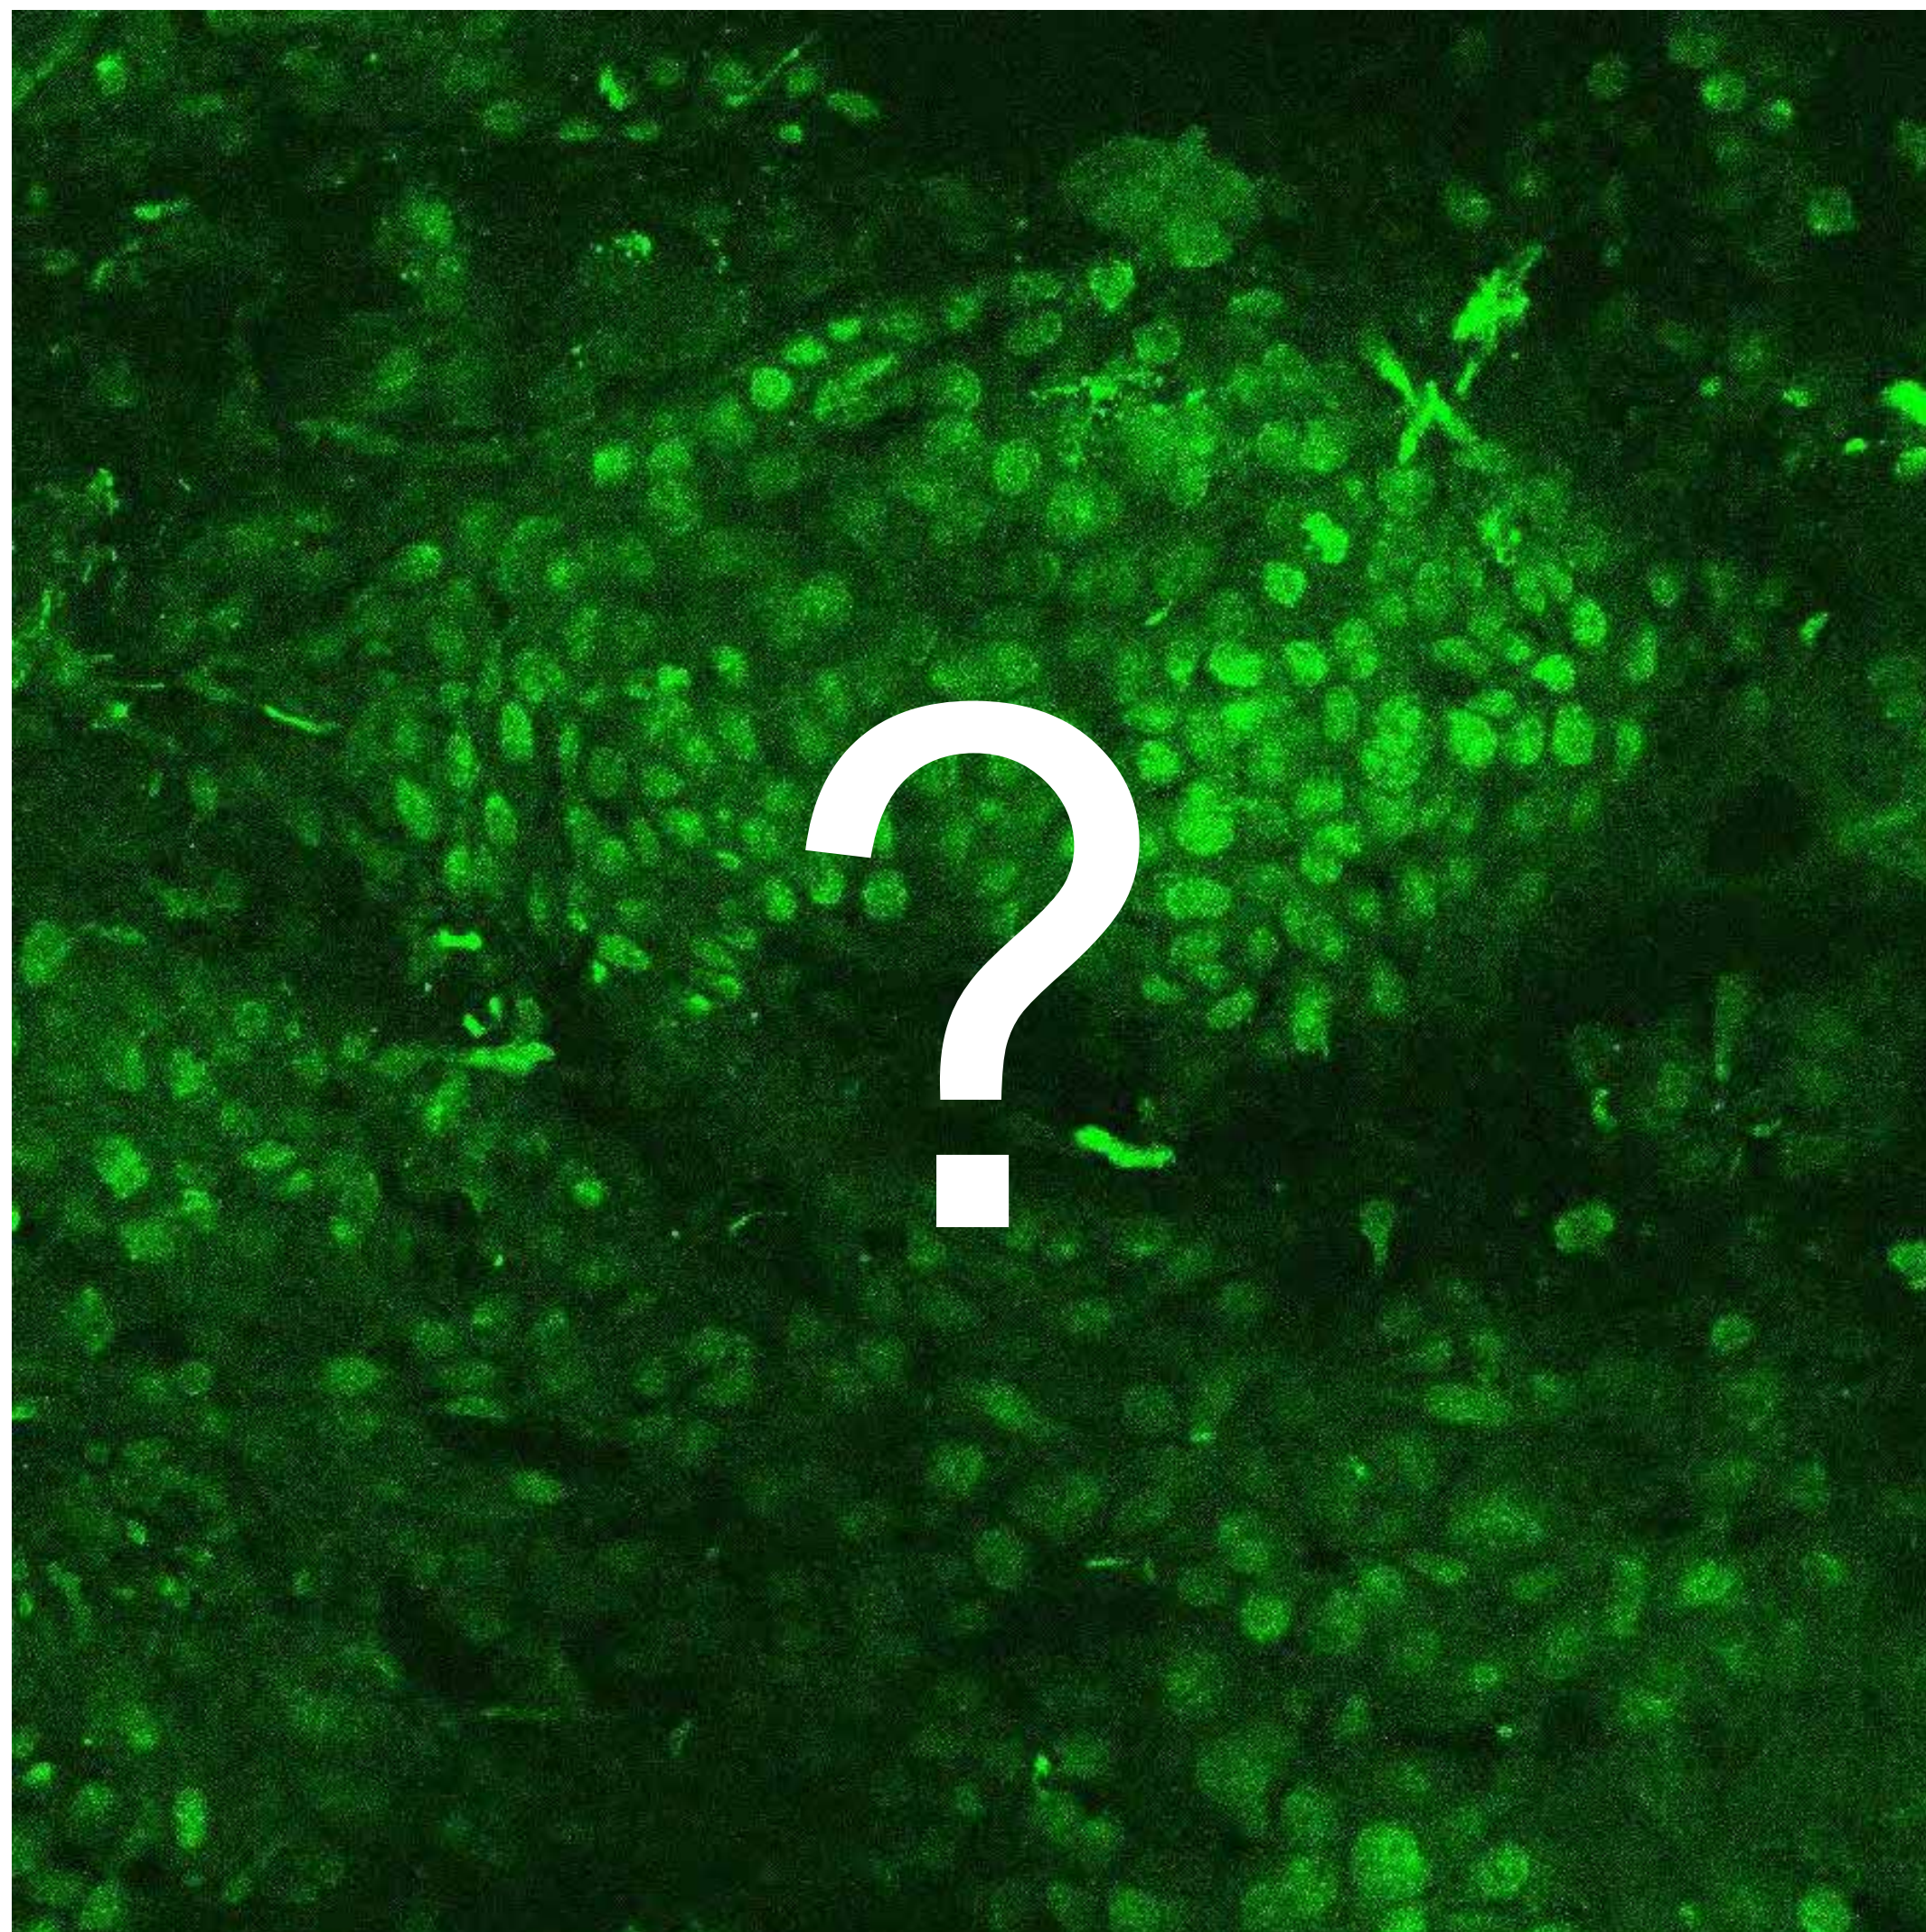

Tumor

Margin



2665

# Overview

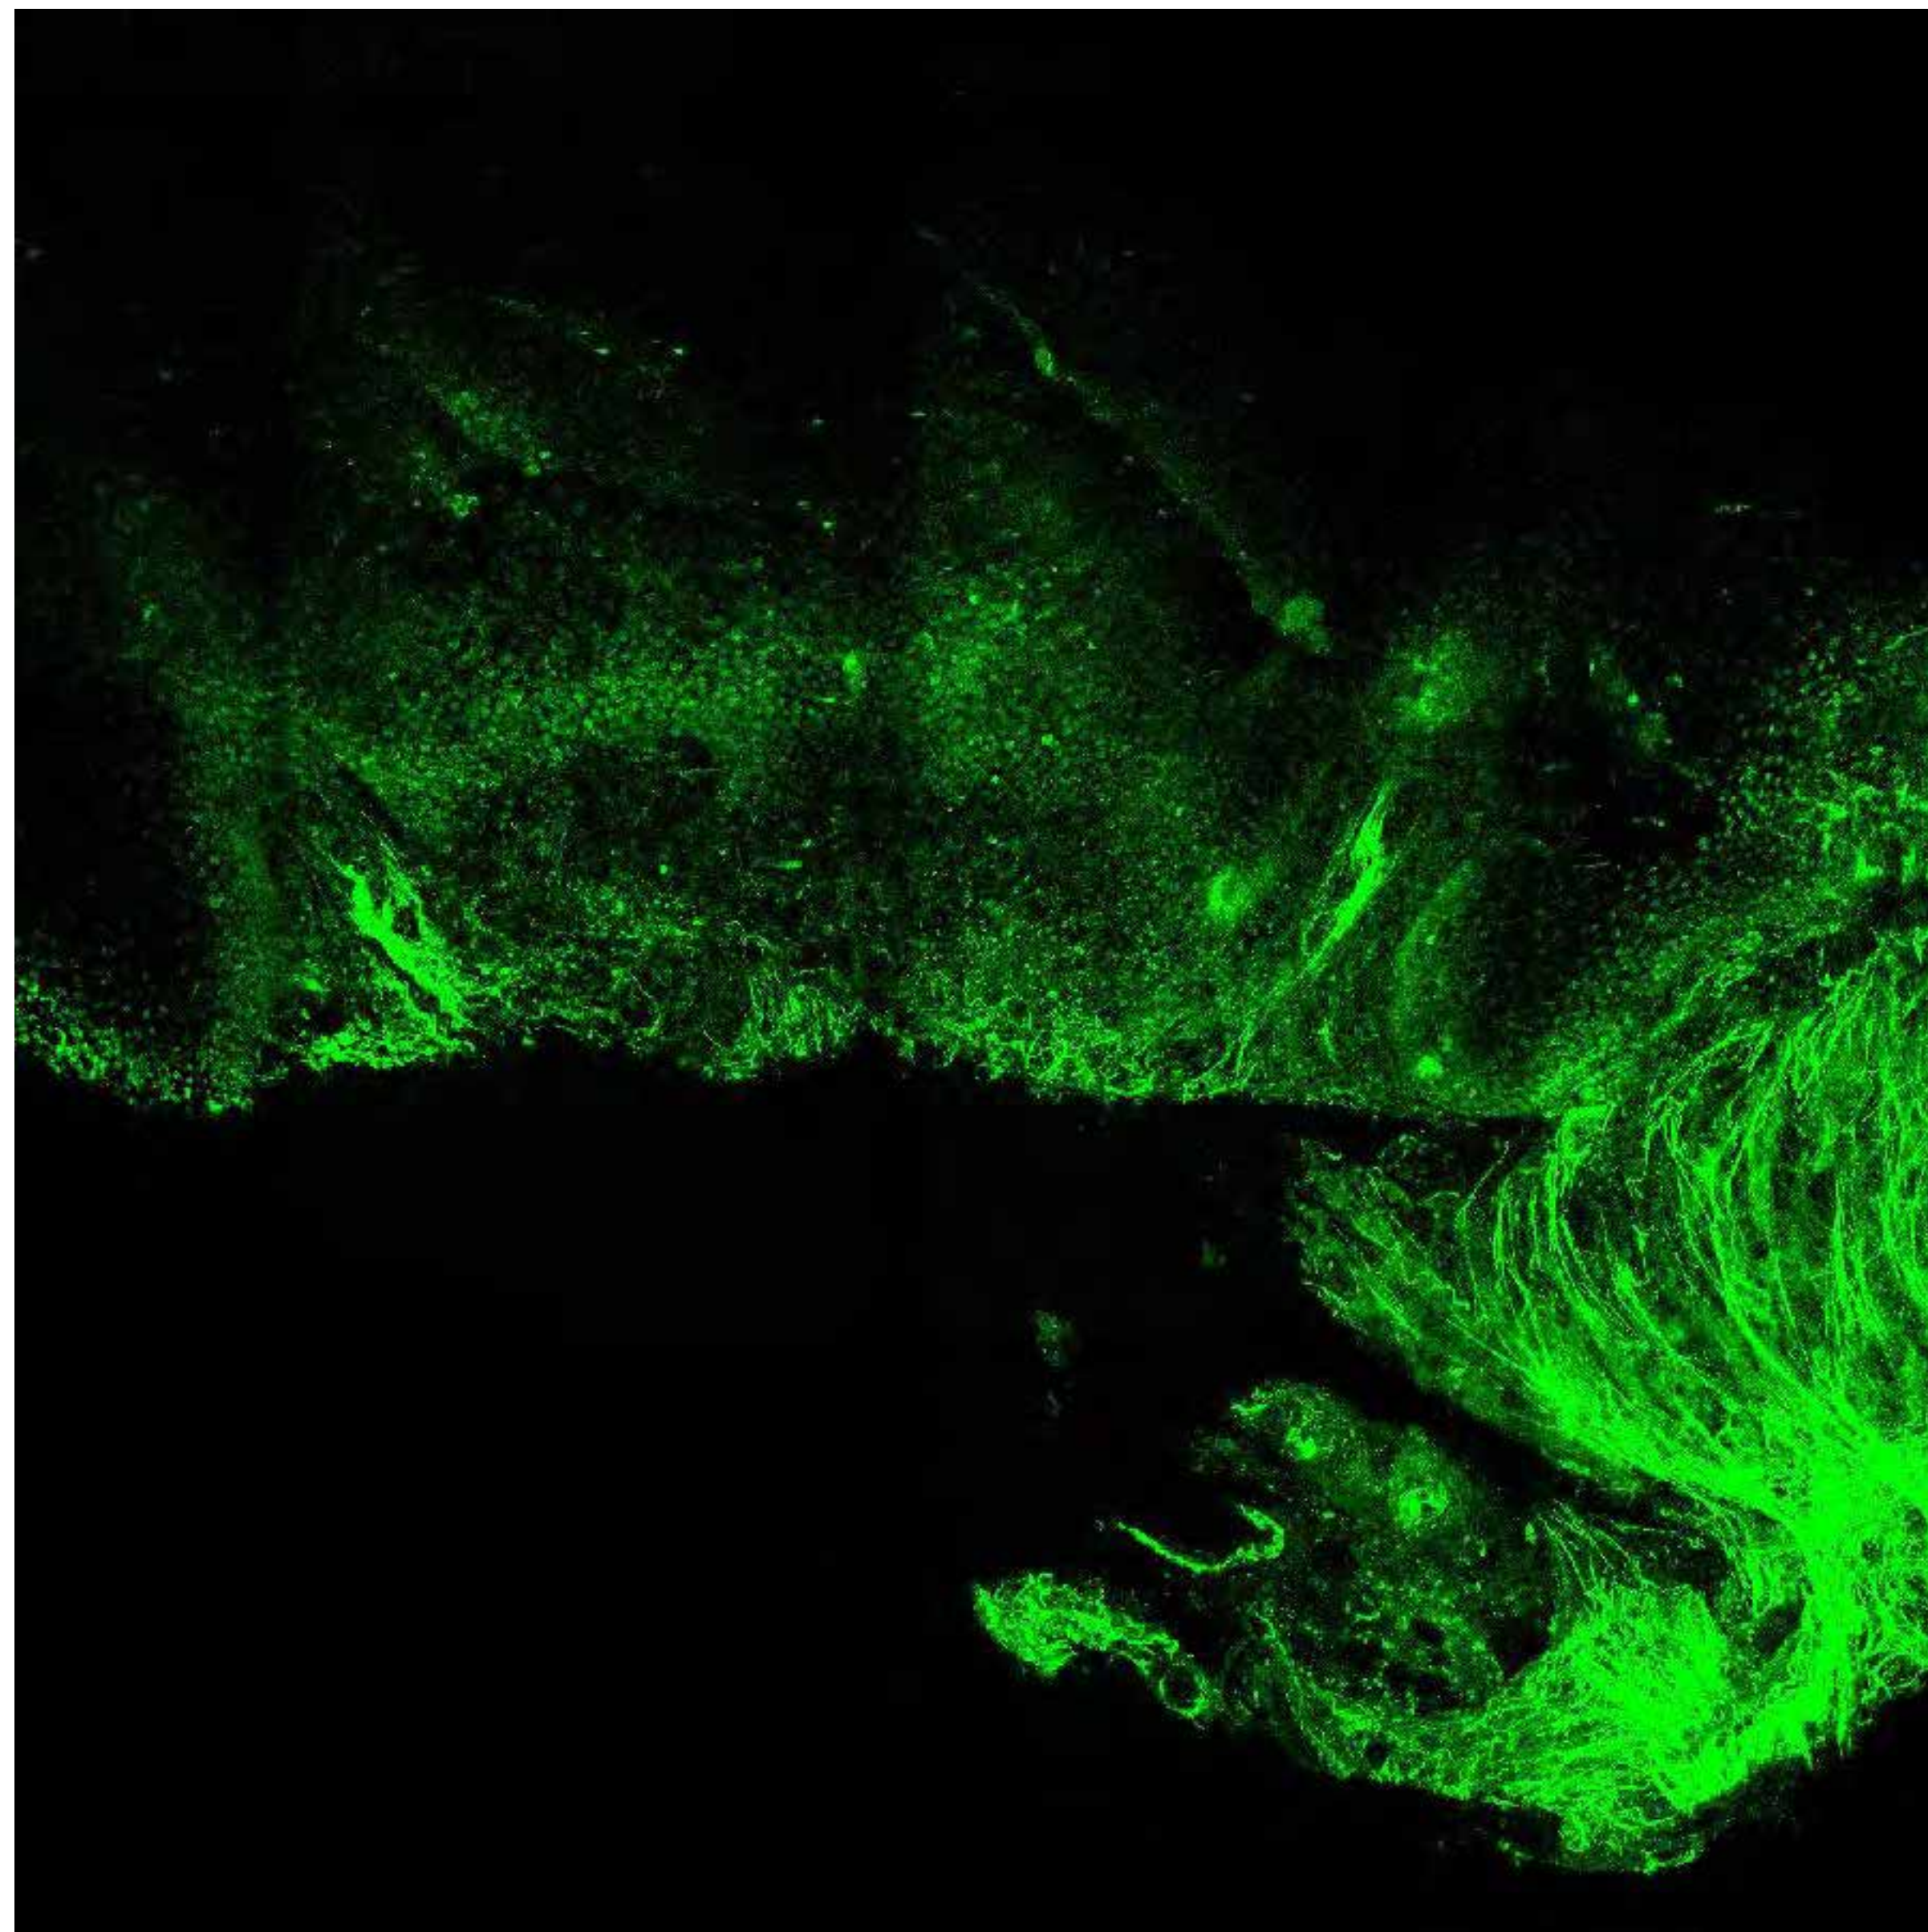

PARPi-FL only (green)

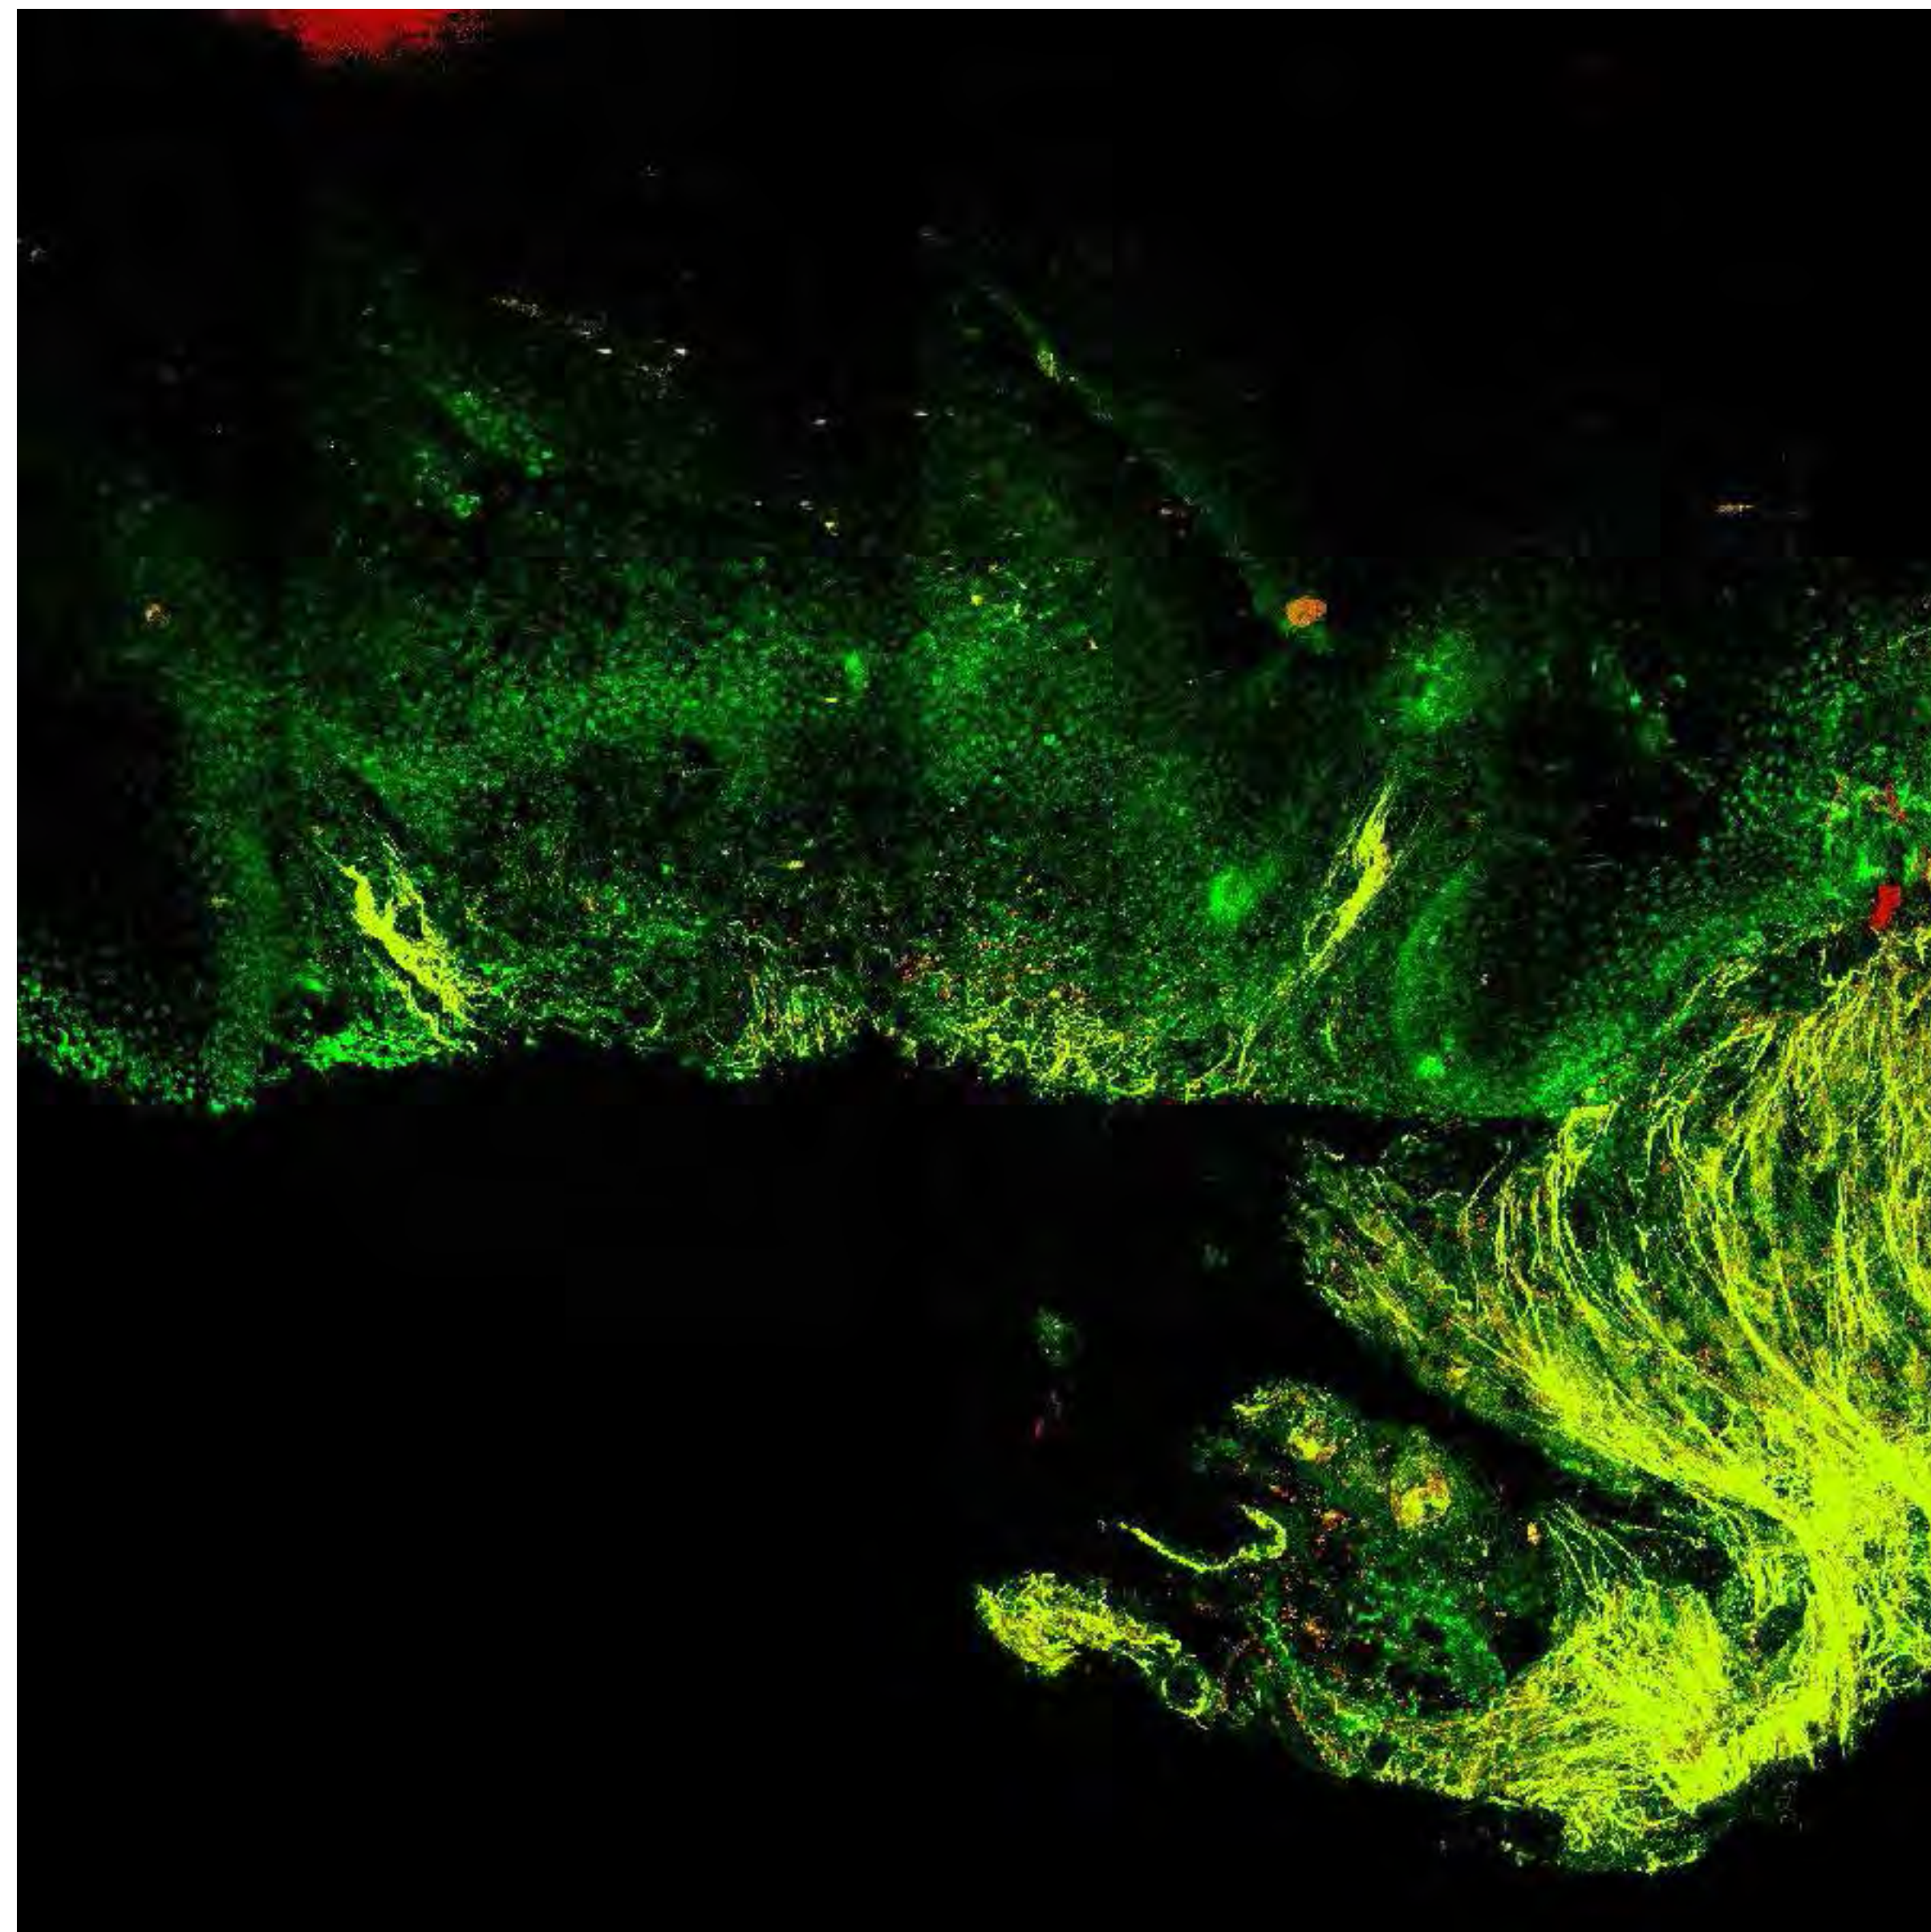

PARPi-FL (green) + Autofluorescence (red/yellow)



2665

Close-up

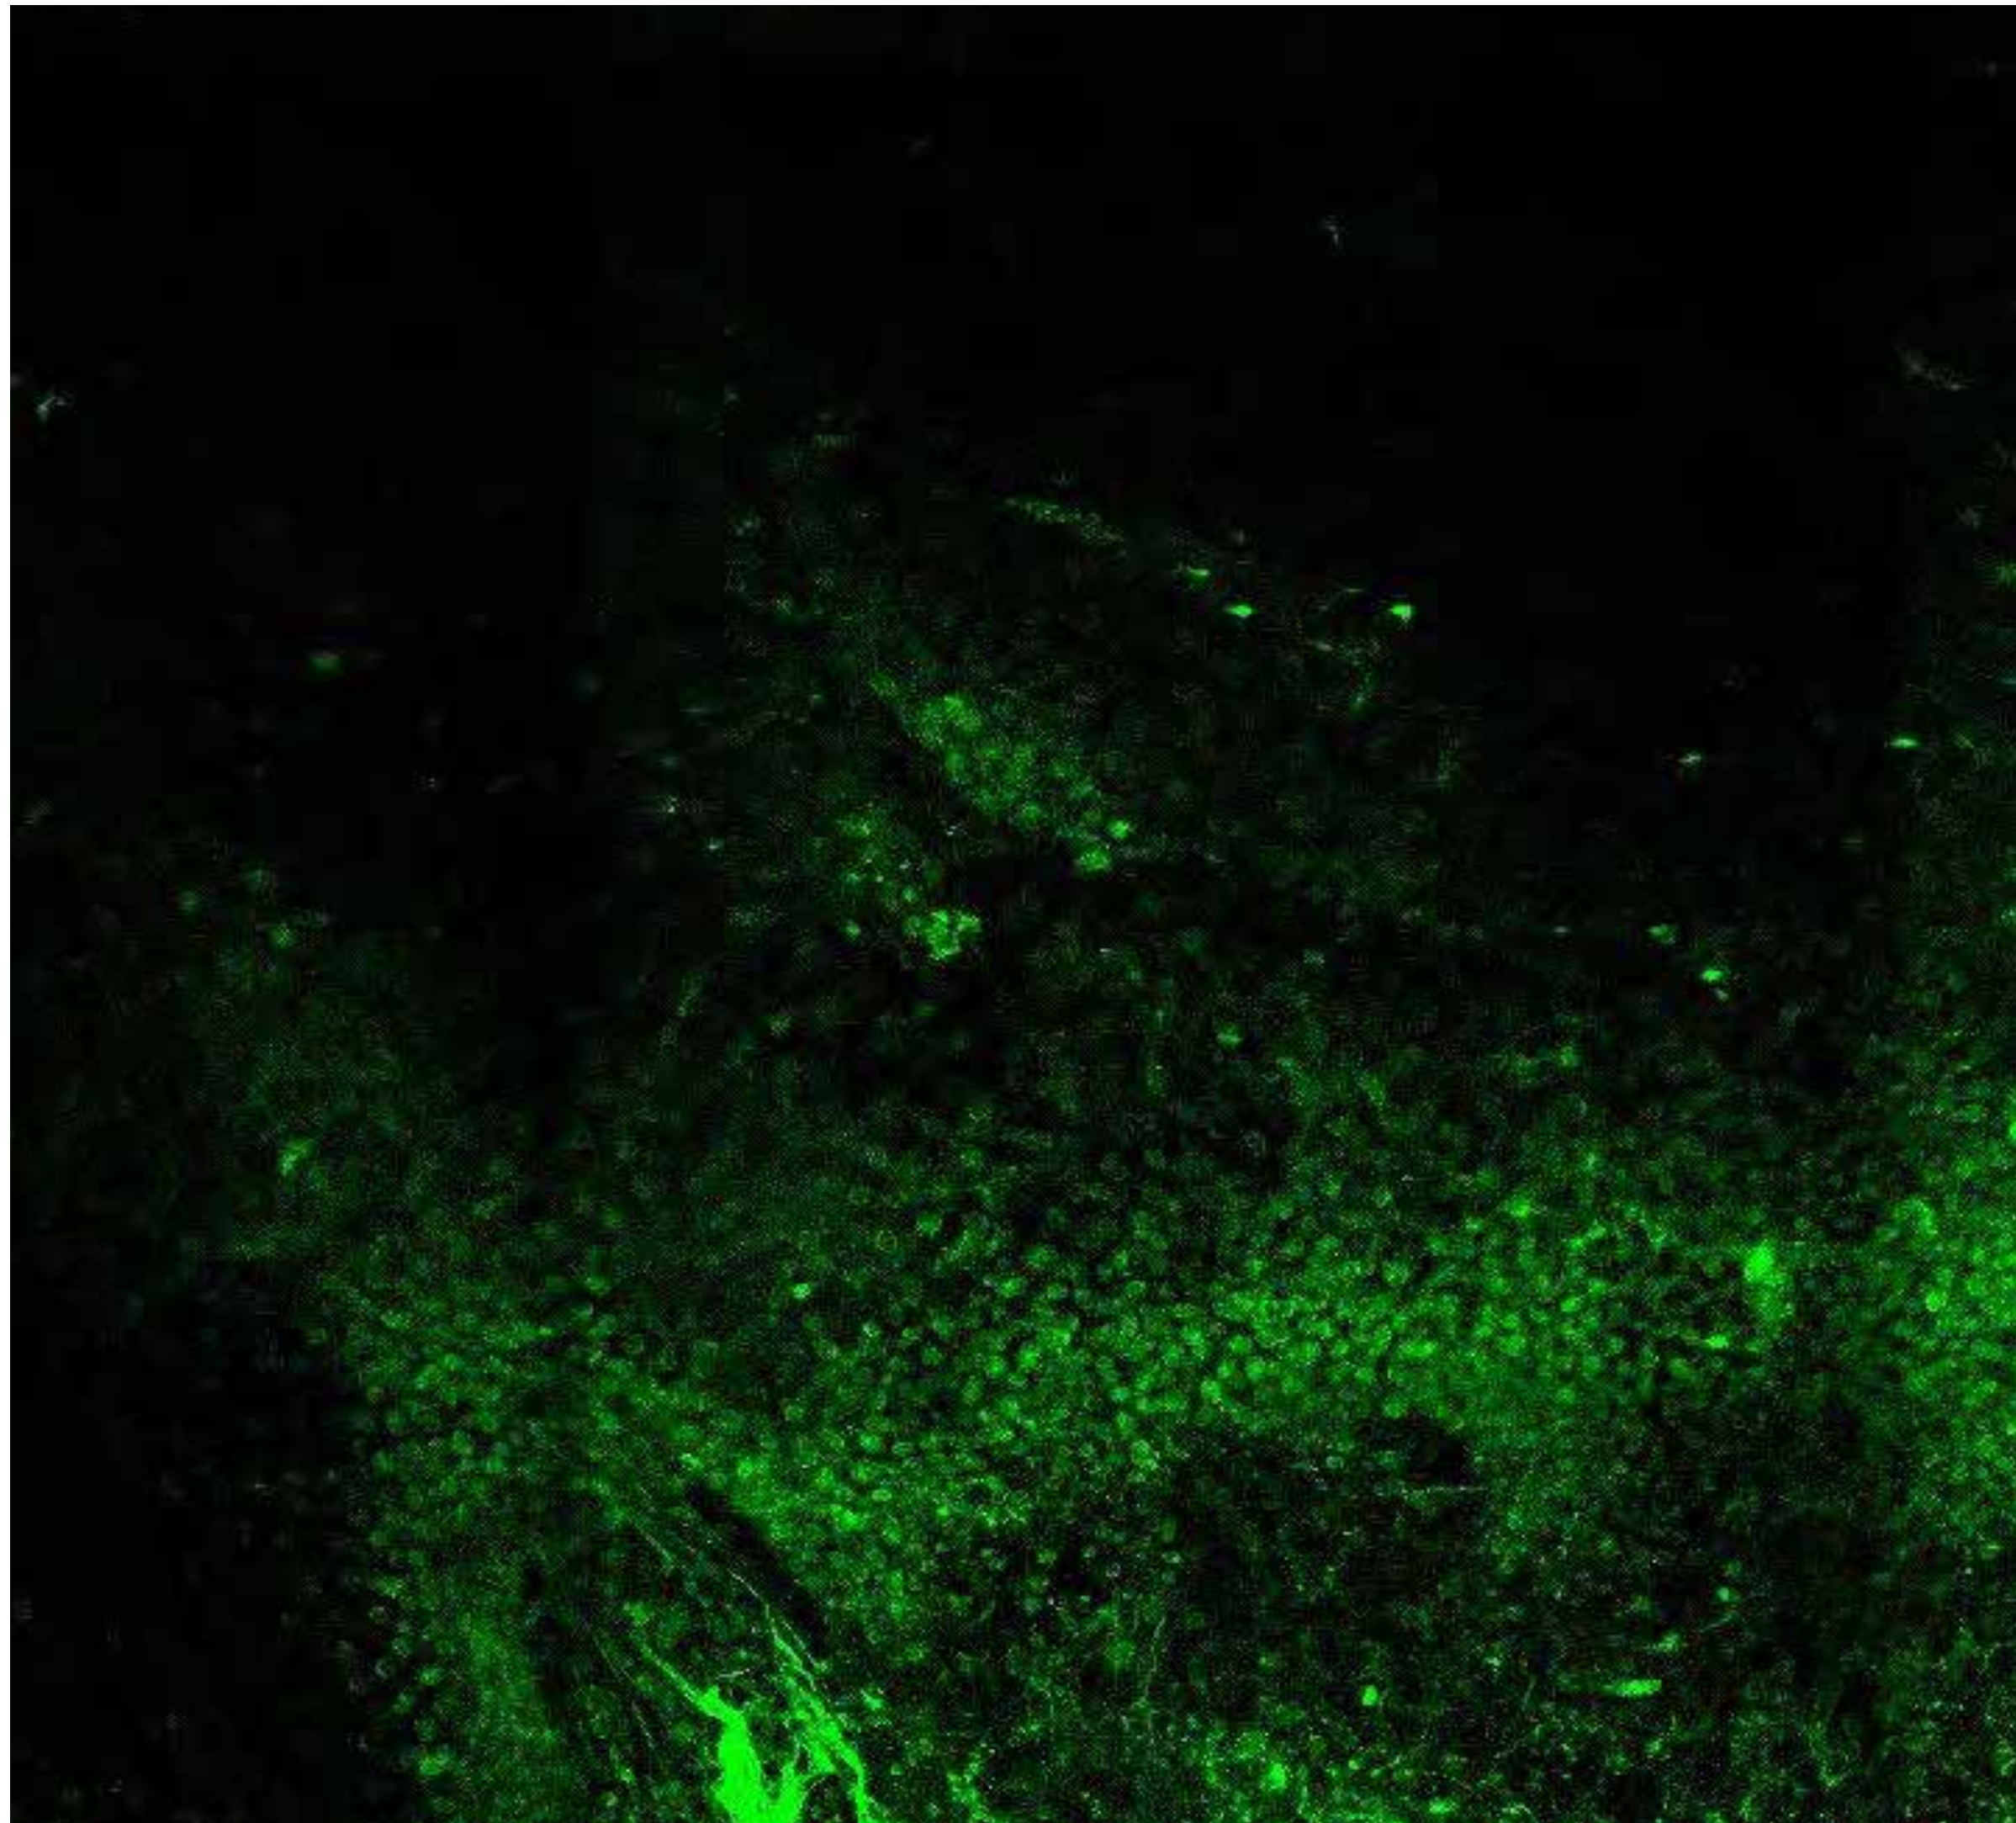

PARPi-FL only (green)

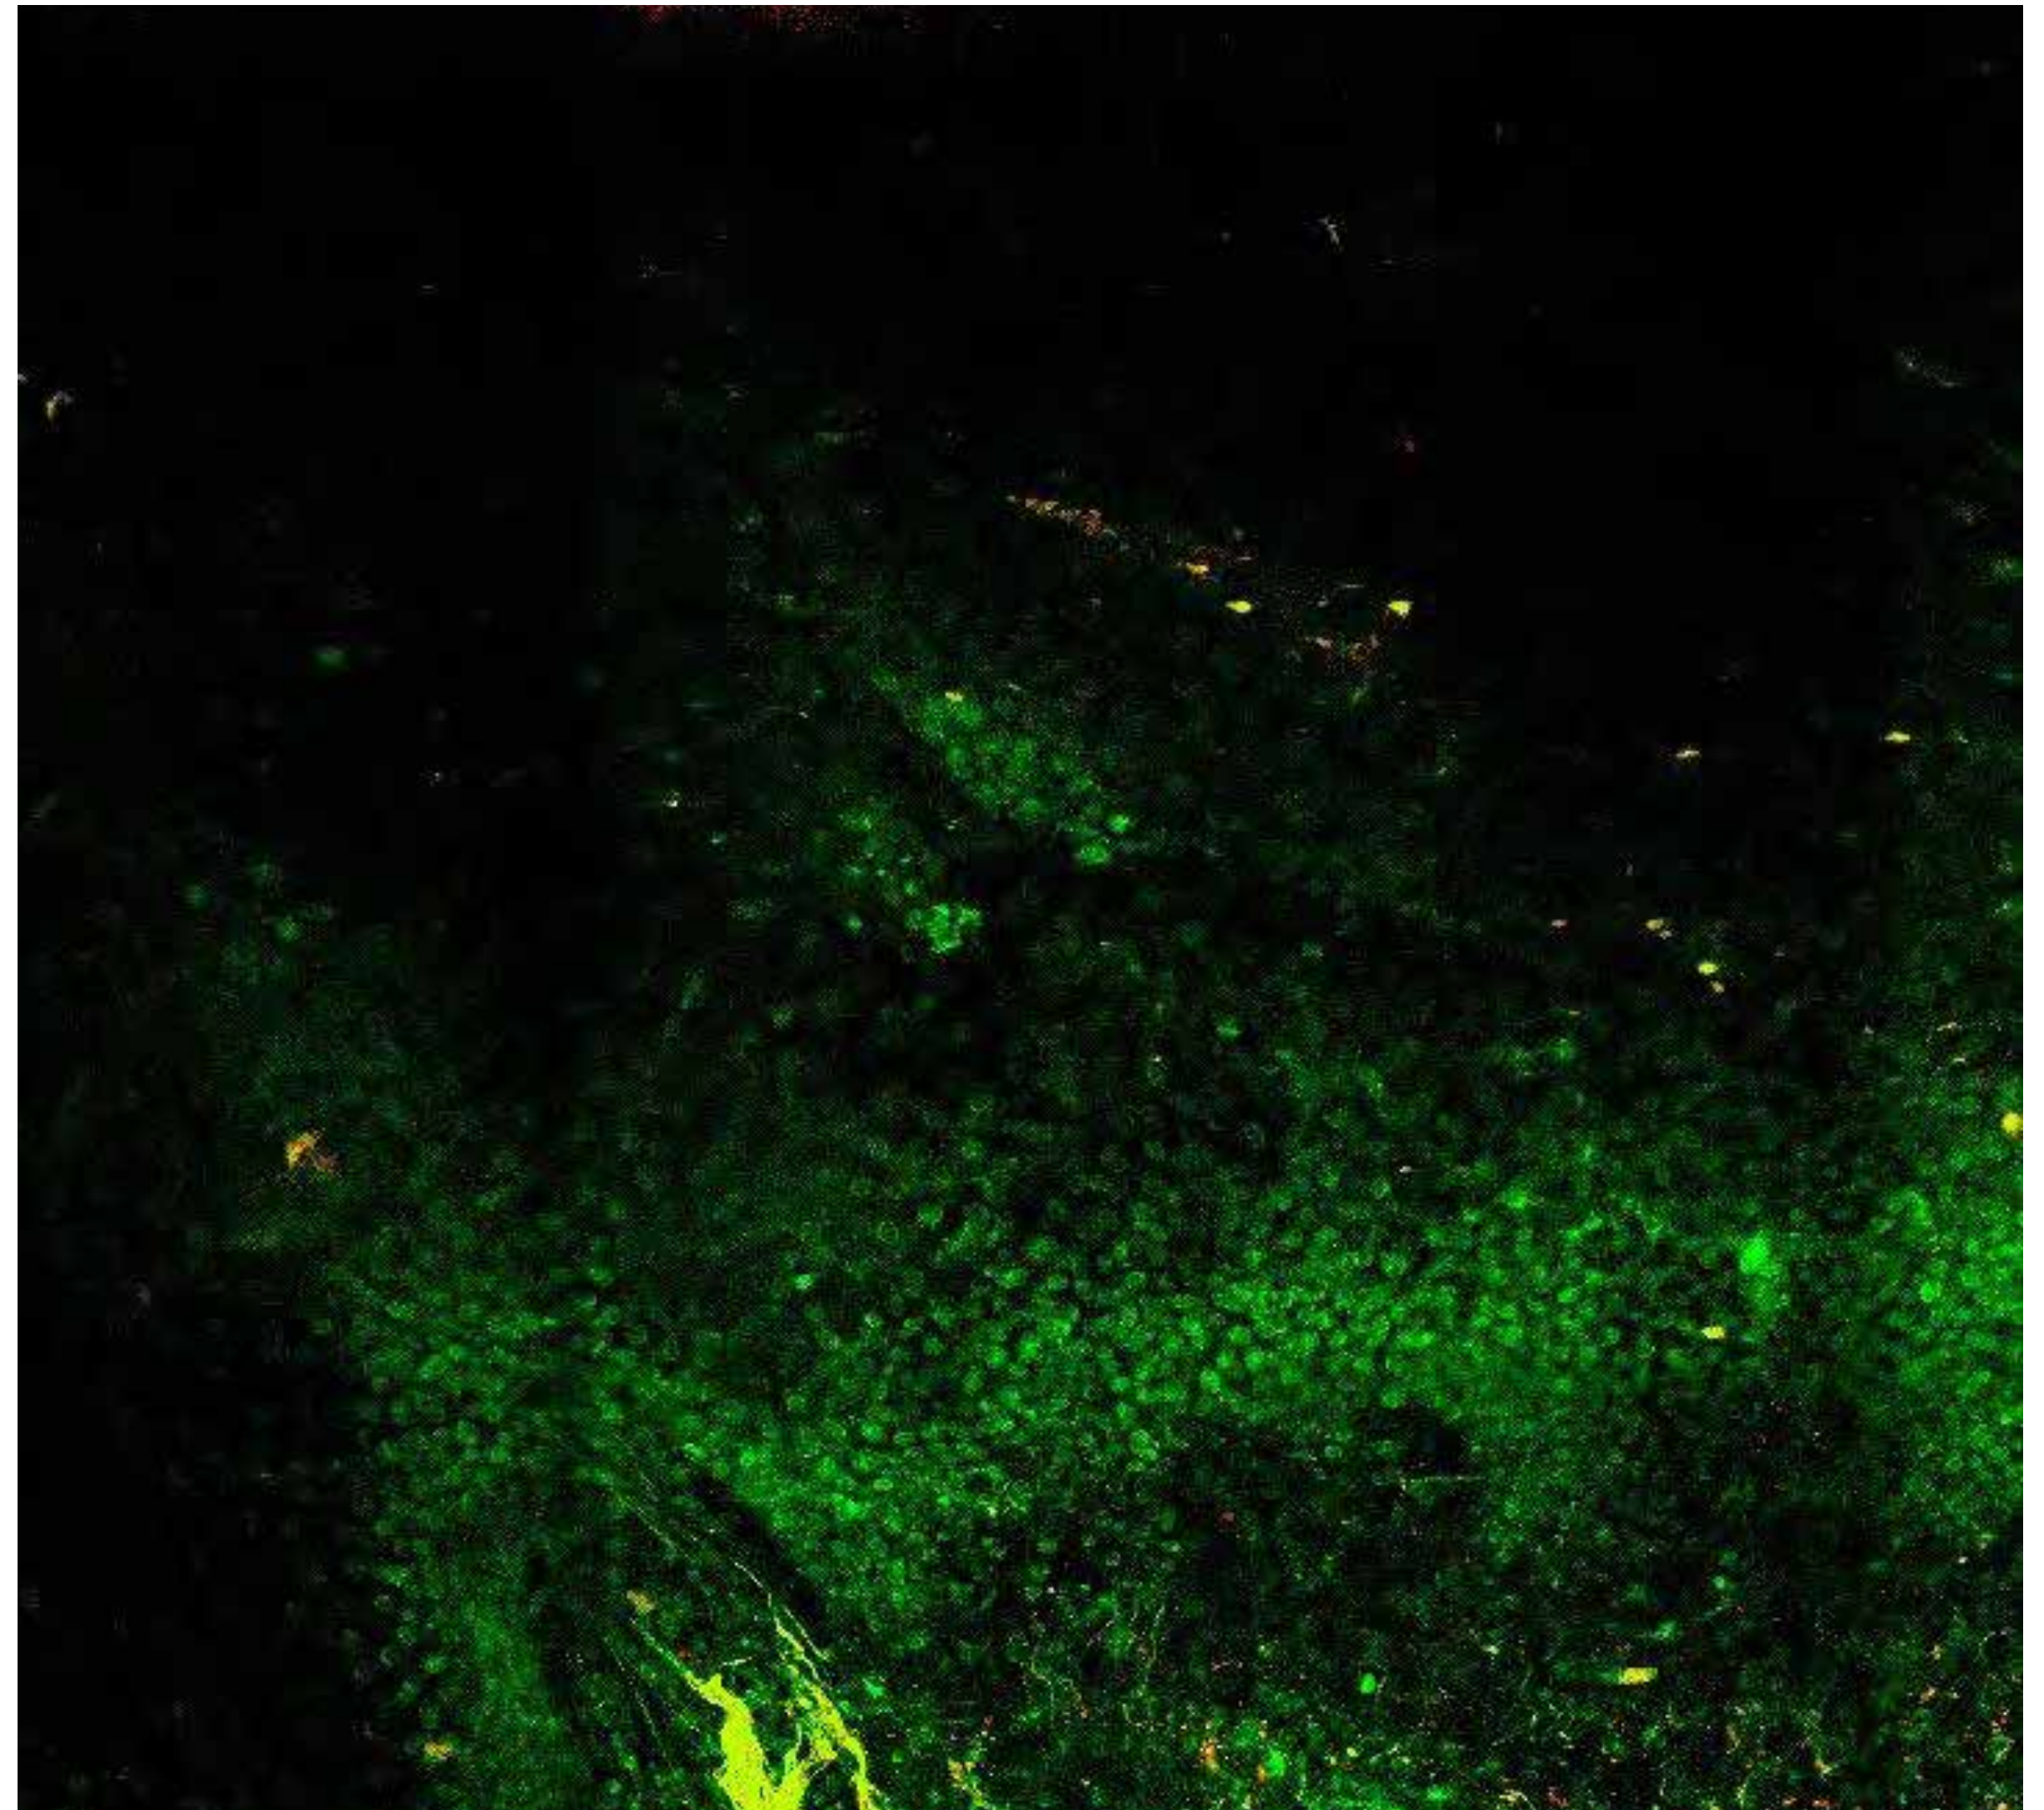

PARPi-FL (green) + Autofluorescence (red/yellow)



2665

Close-up

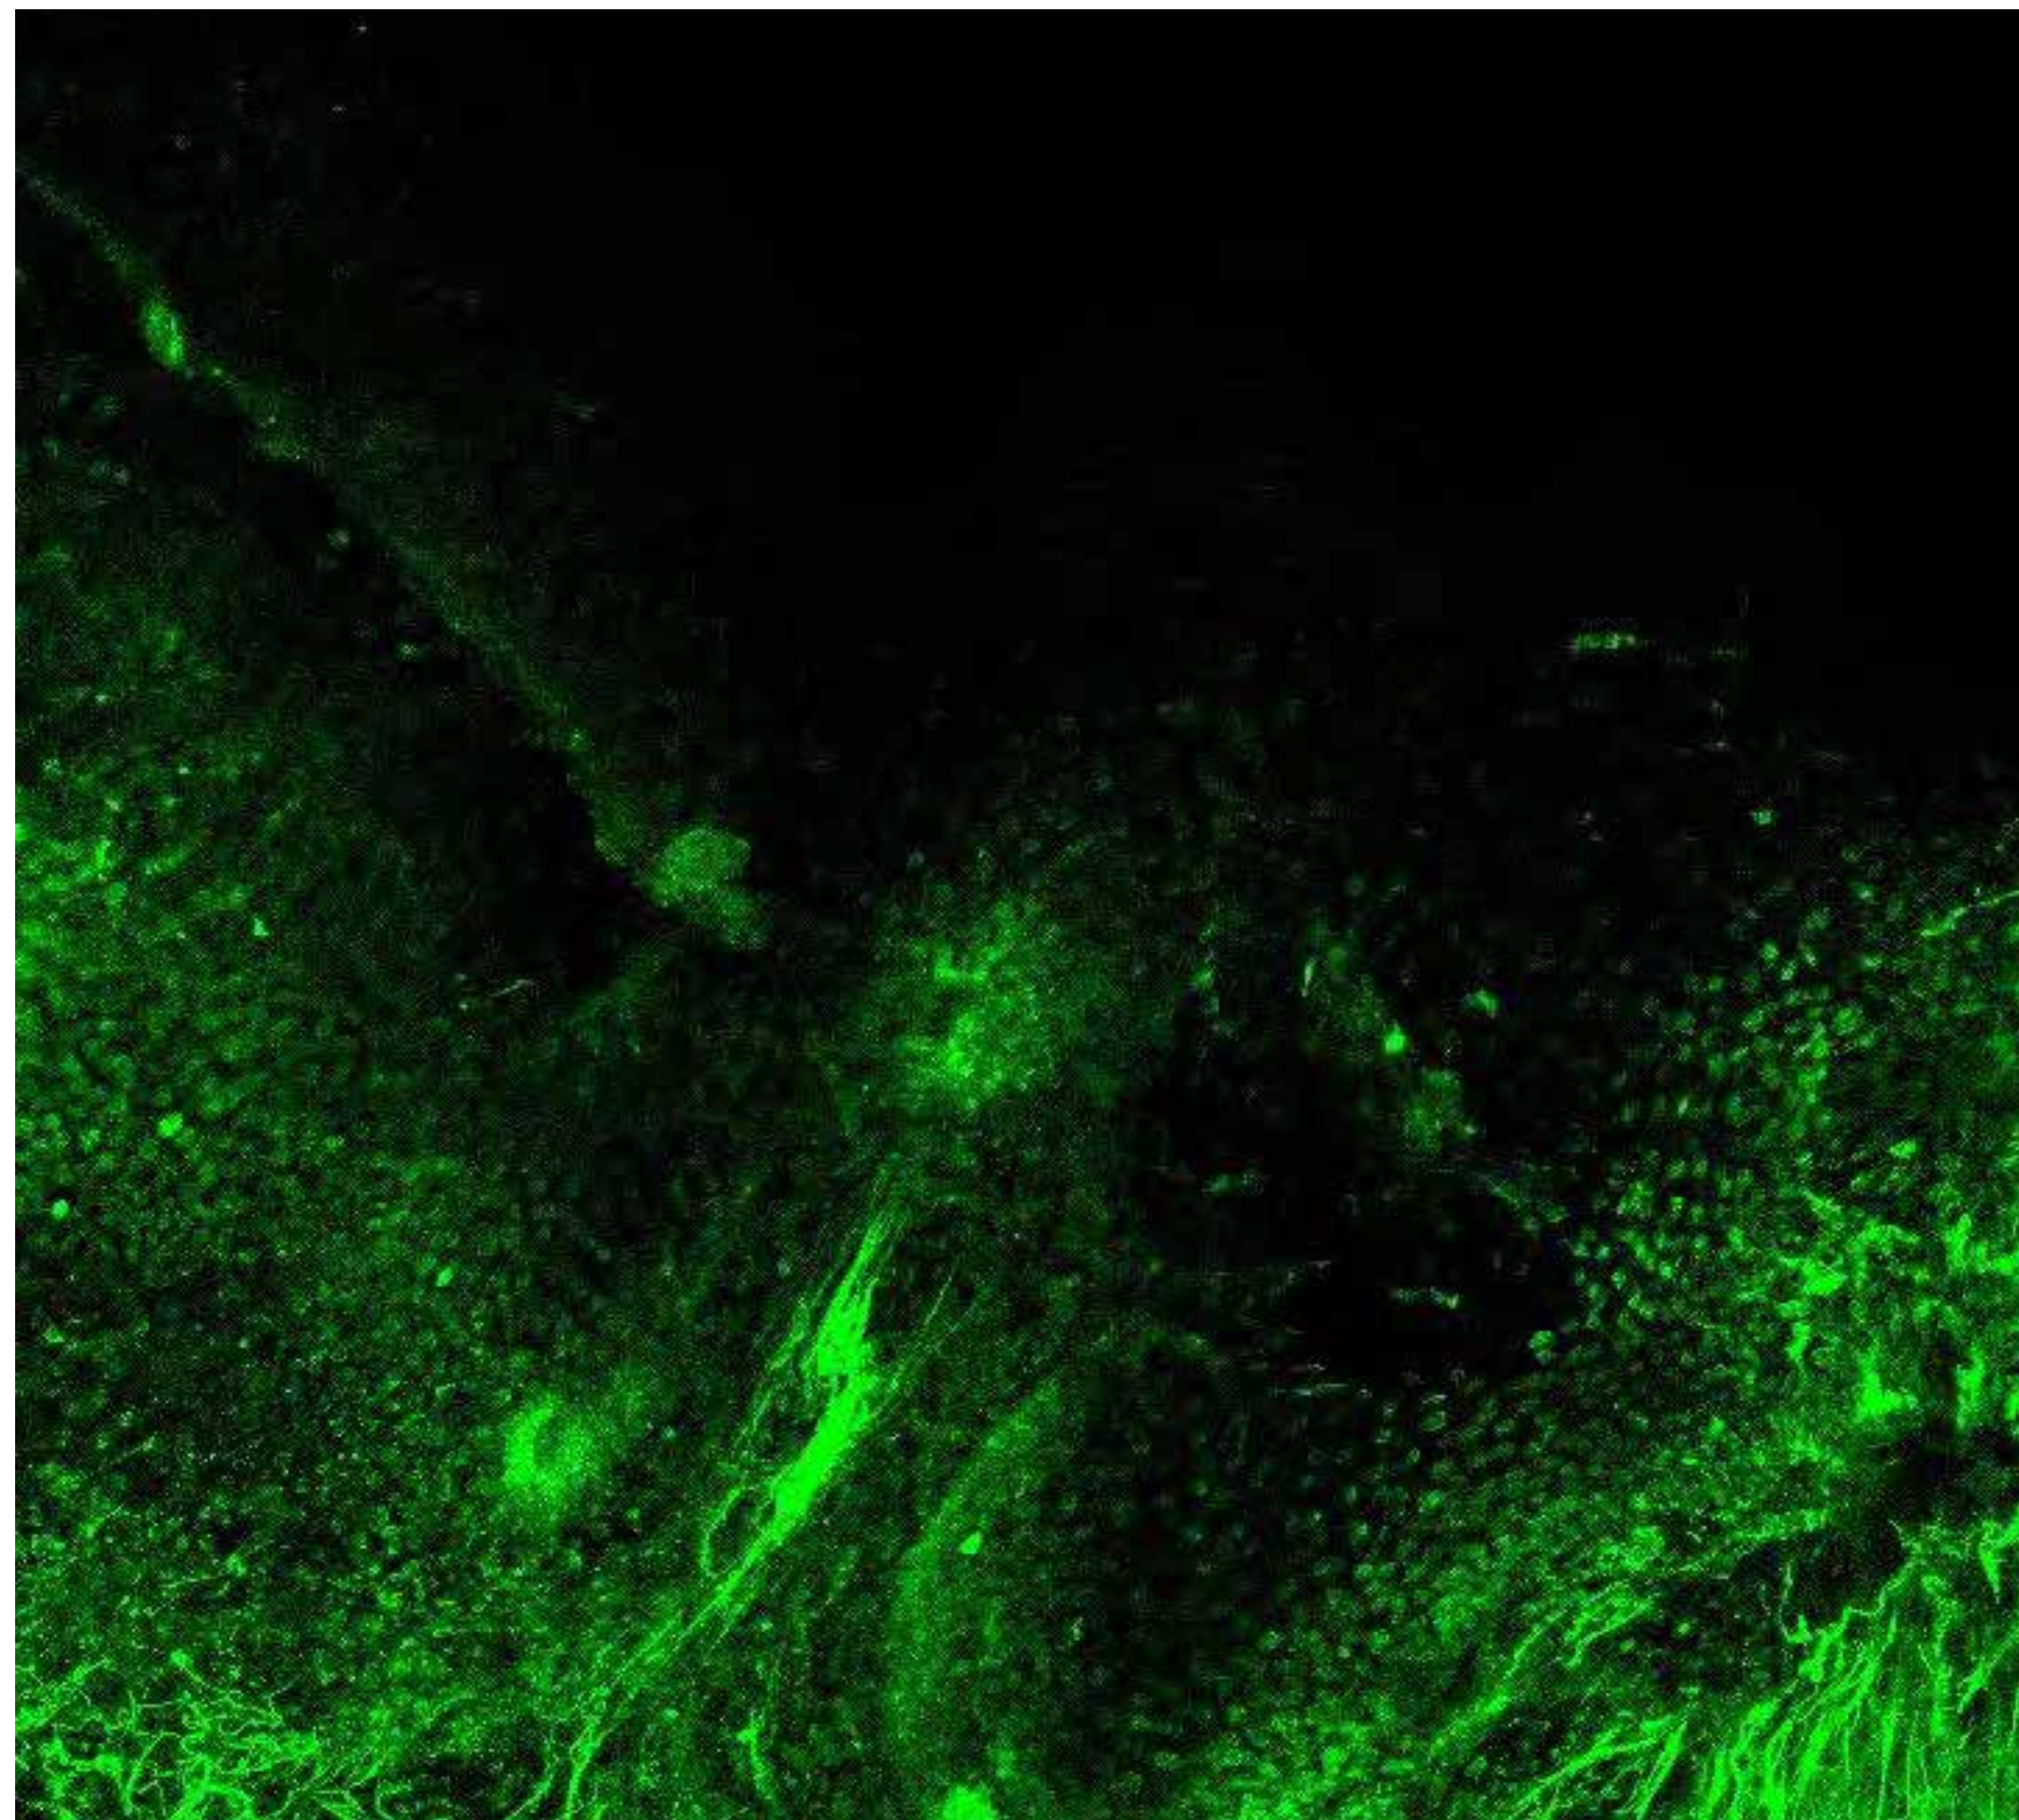

PARPi-FL only (green)

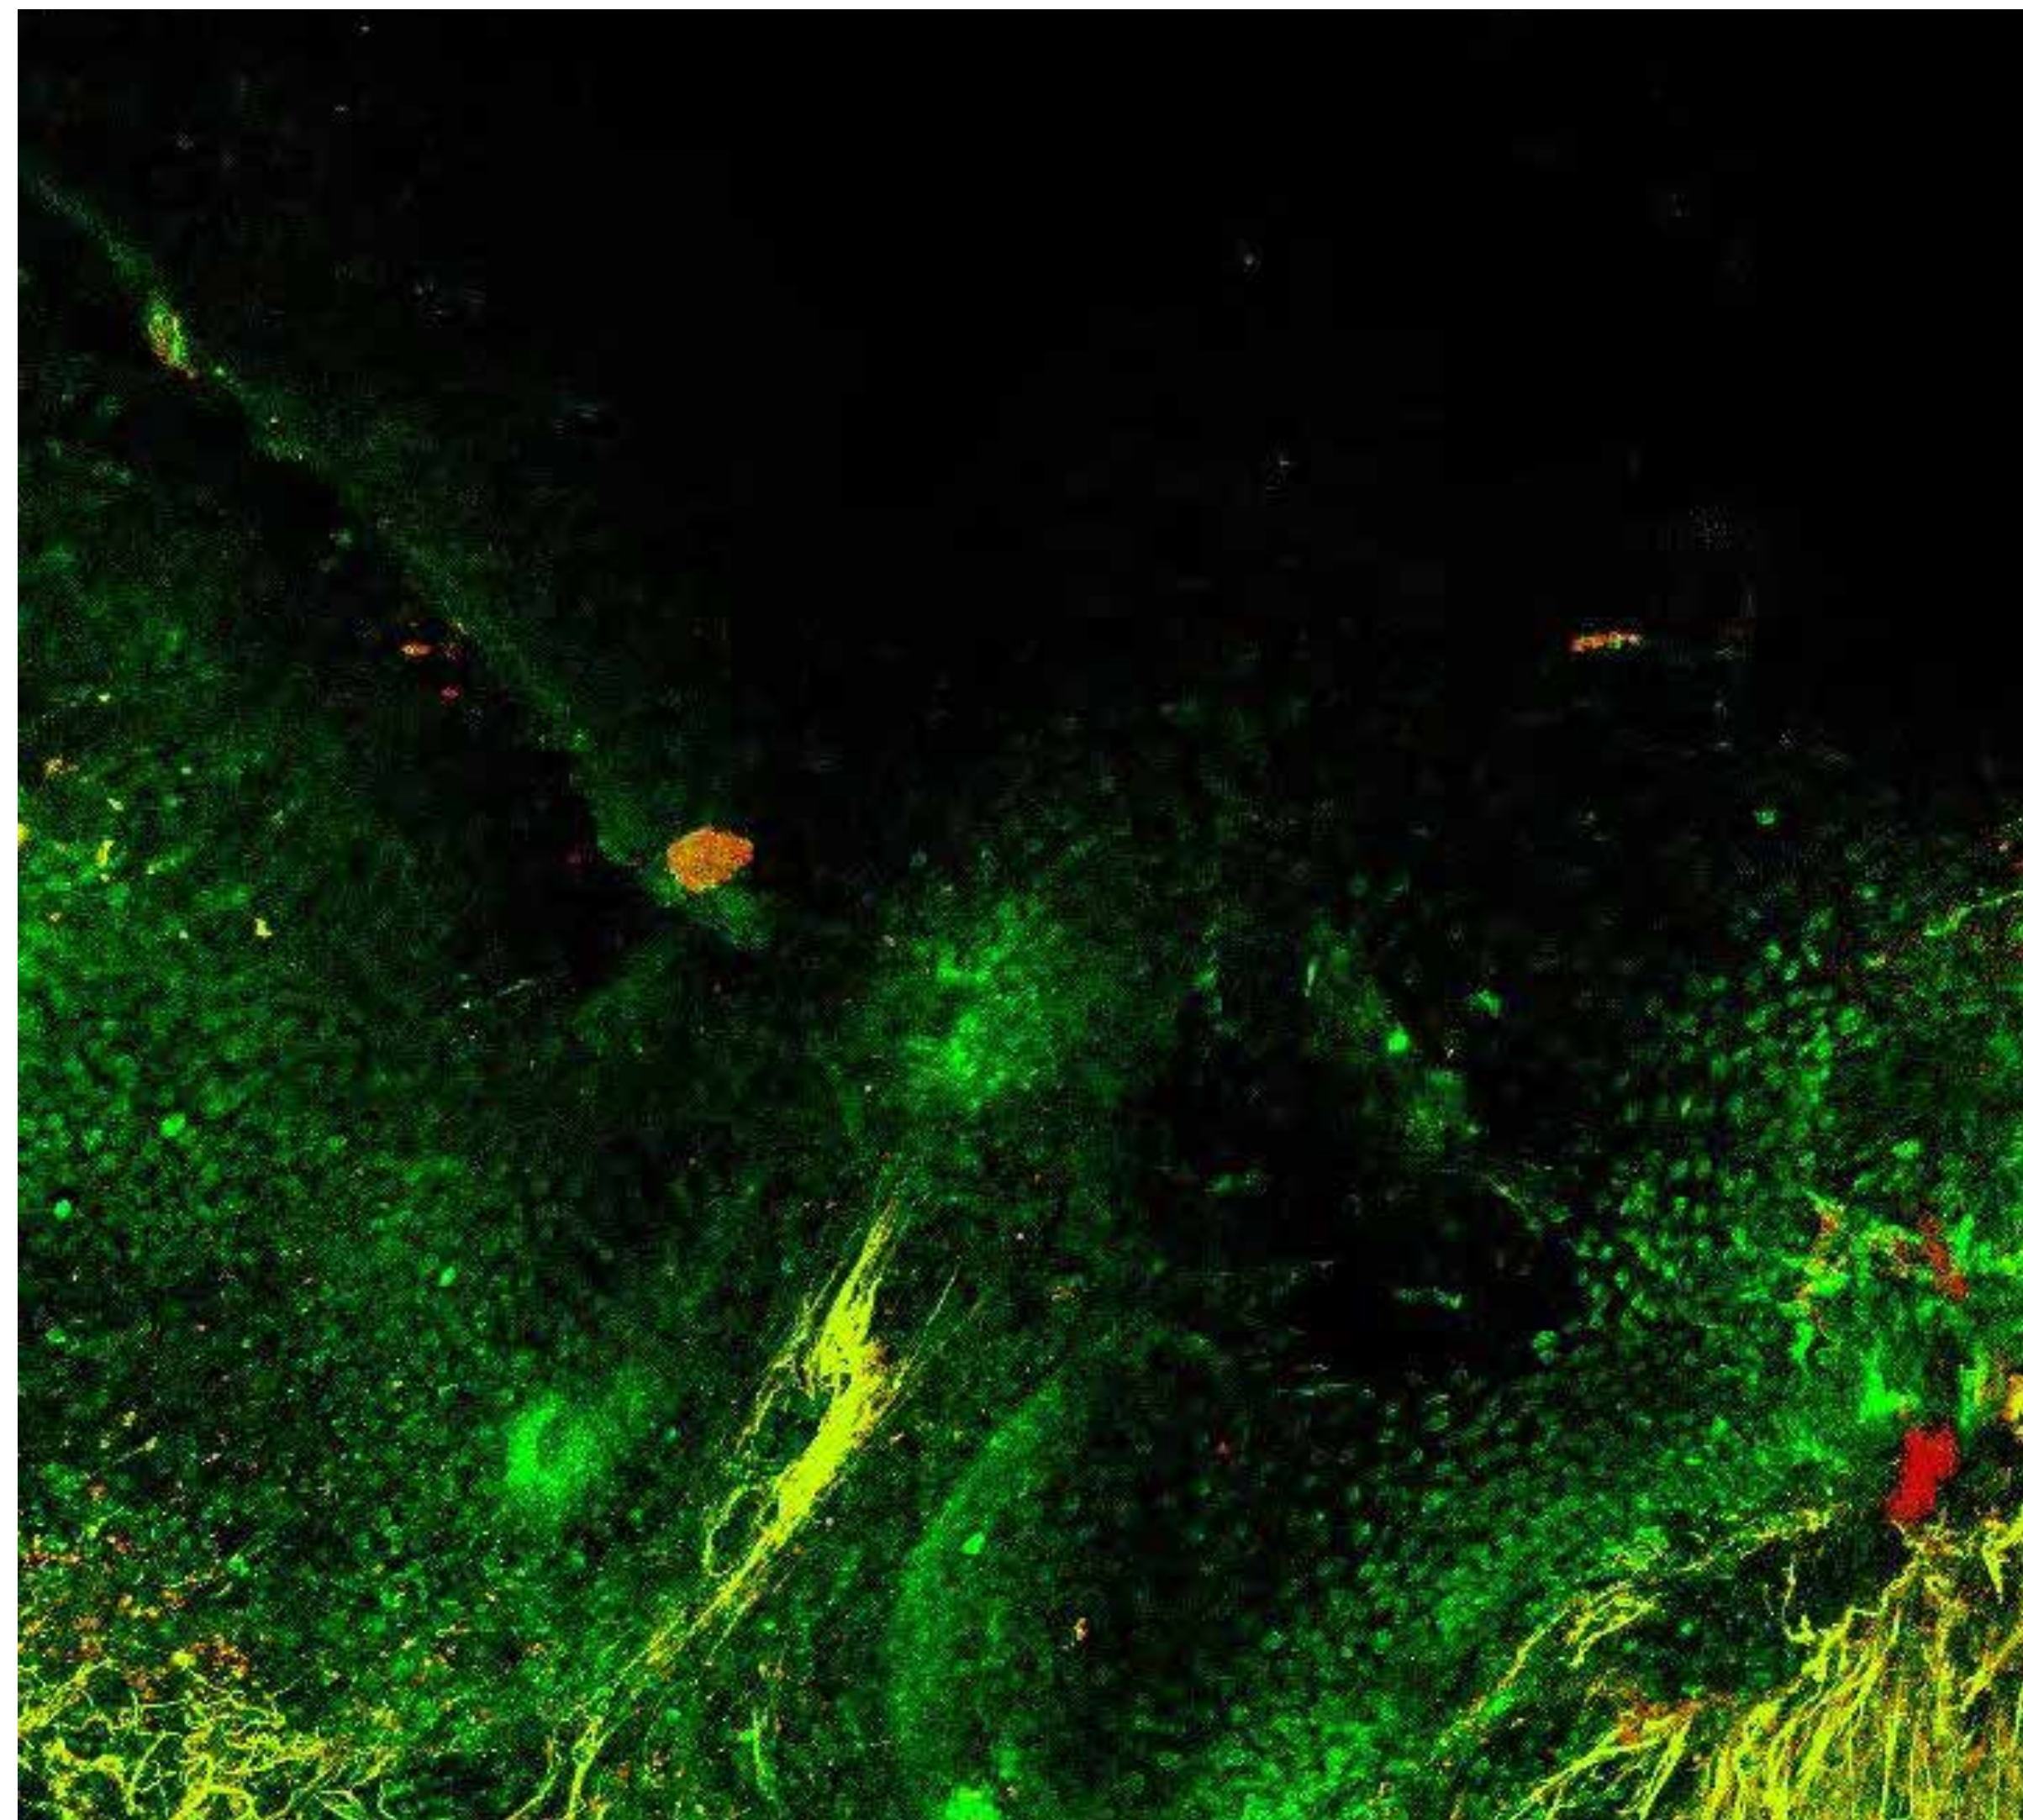

PARPi-FL (green) + Autofluorescence (red/yellow)



2665

Close-up

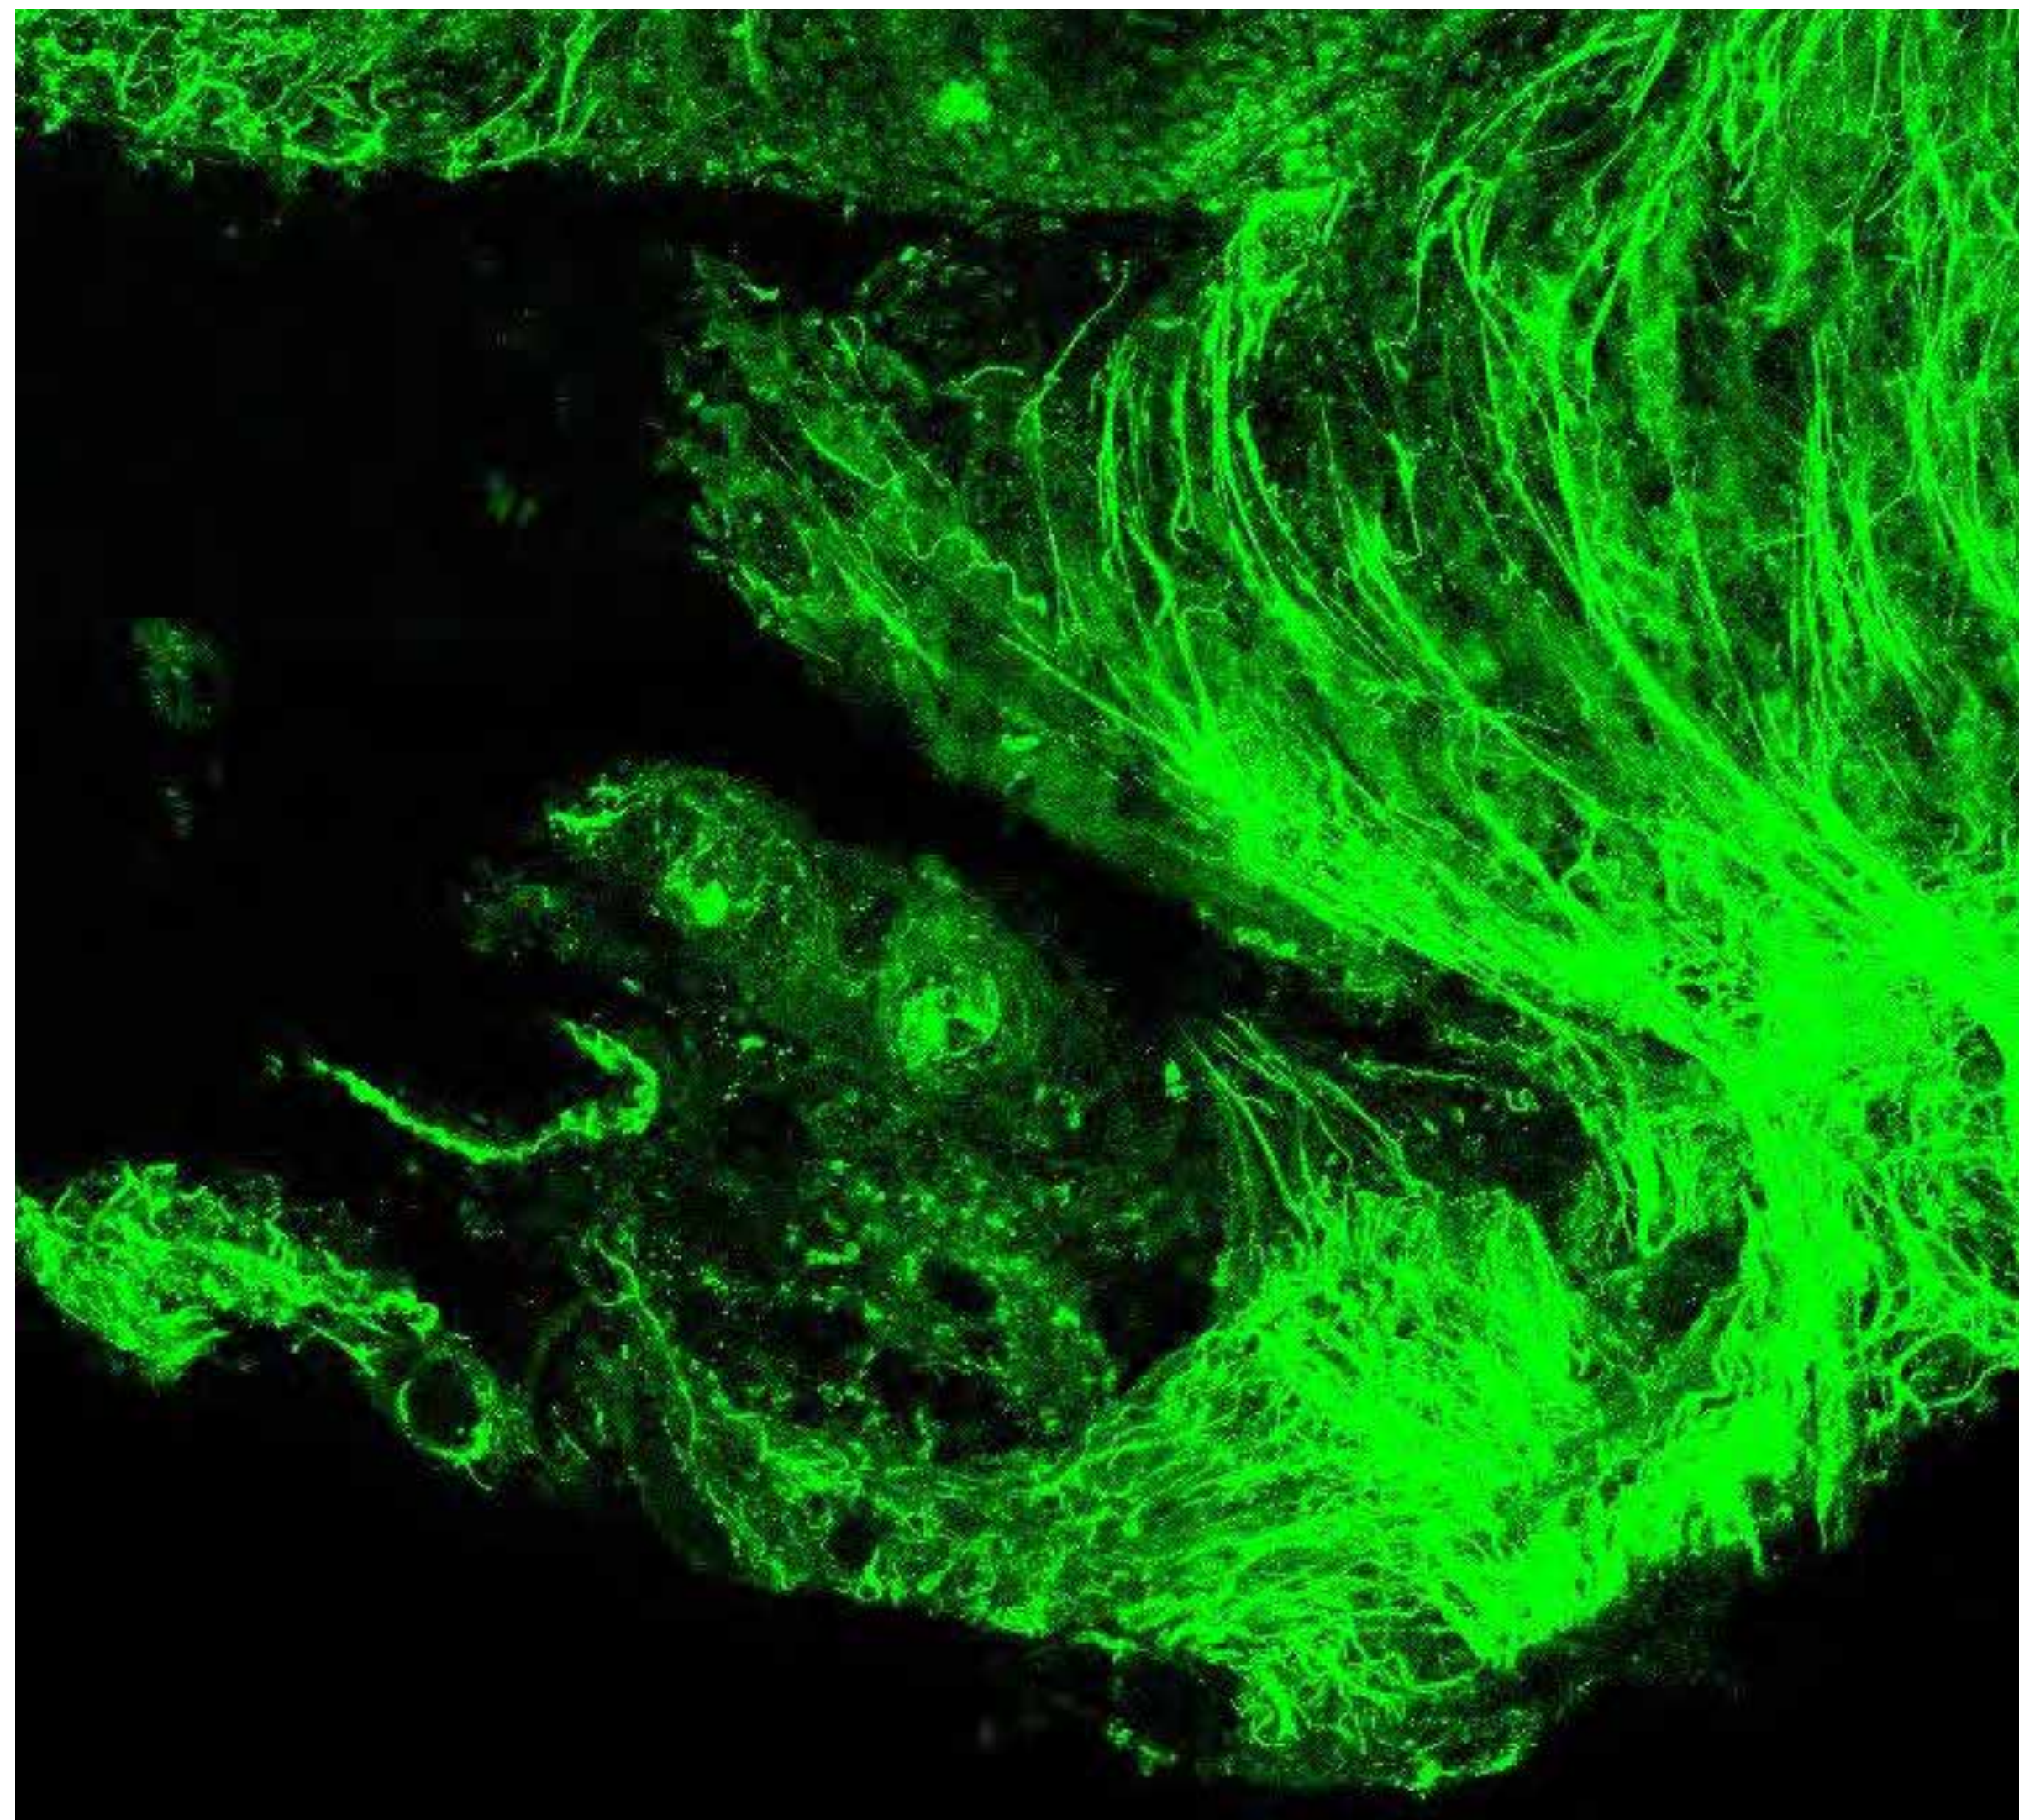

PARPi-FL only (green)

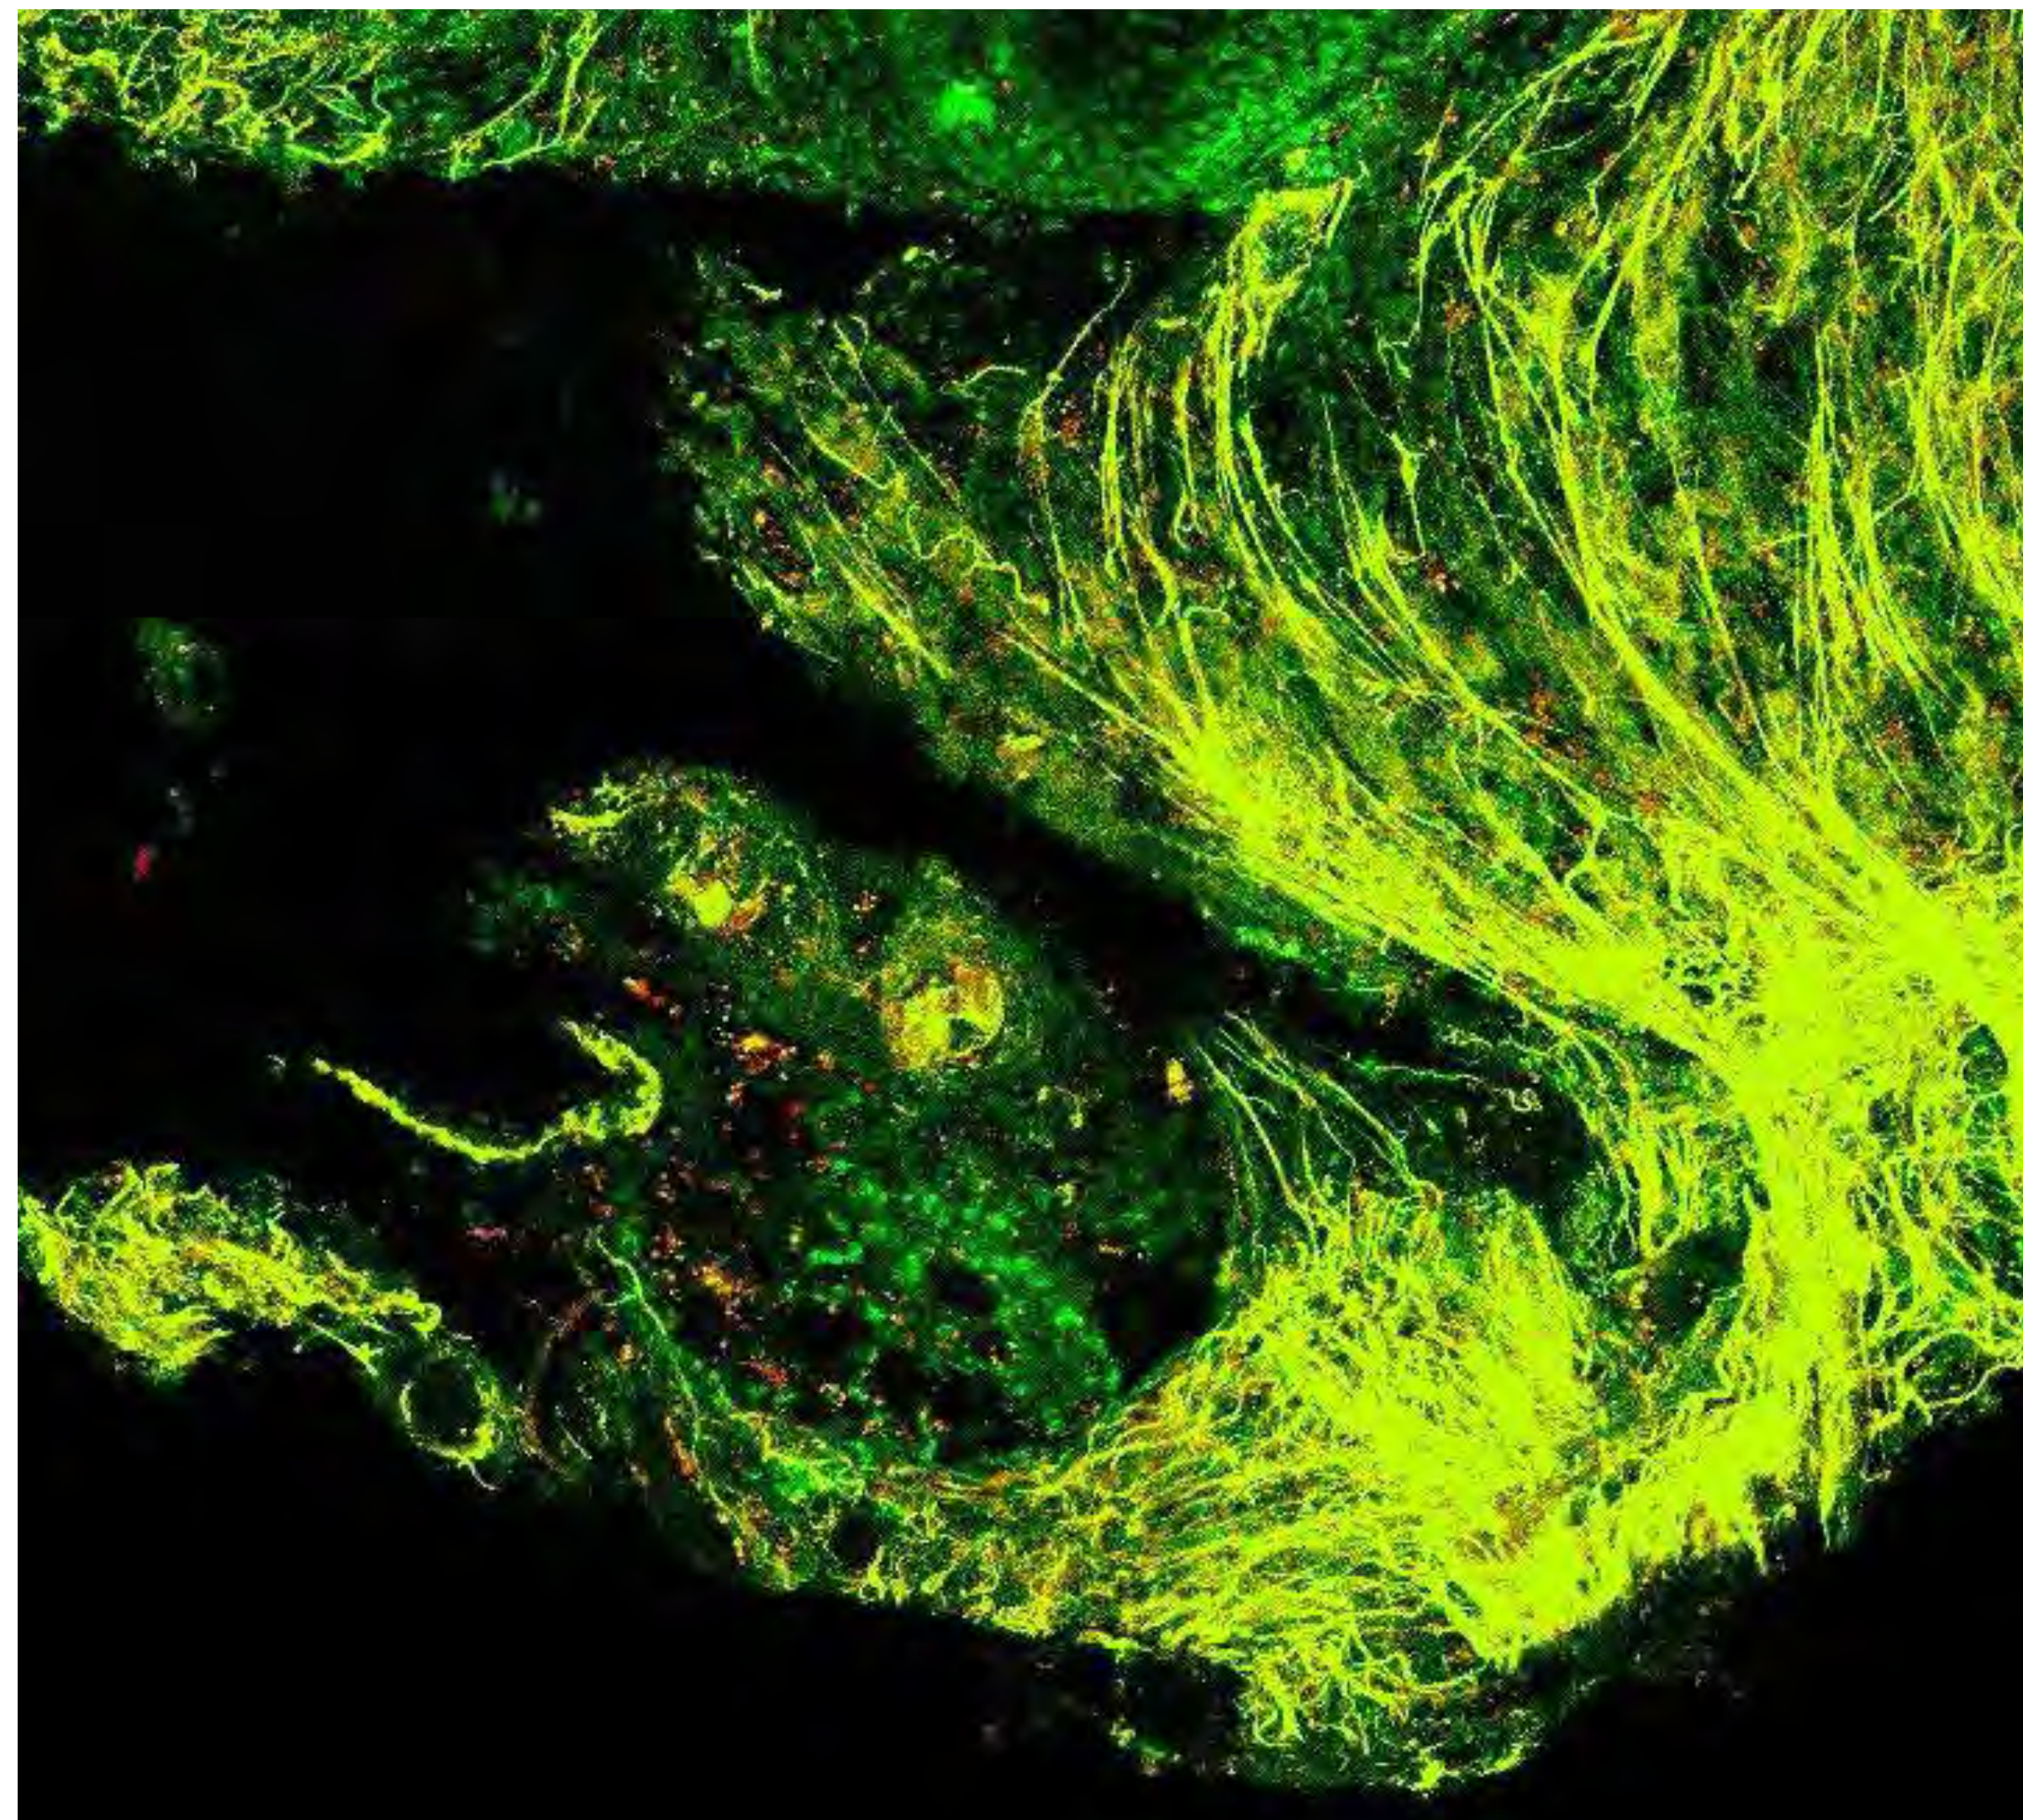

PARPi-FL (green) + Autofluorescence (red/yellow)



2665

10

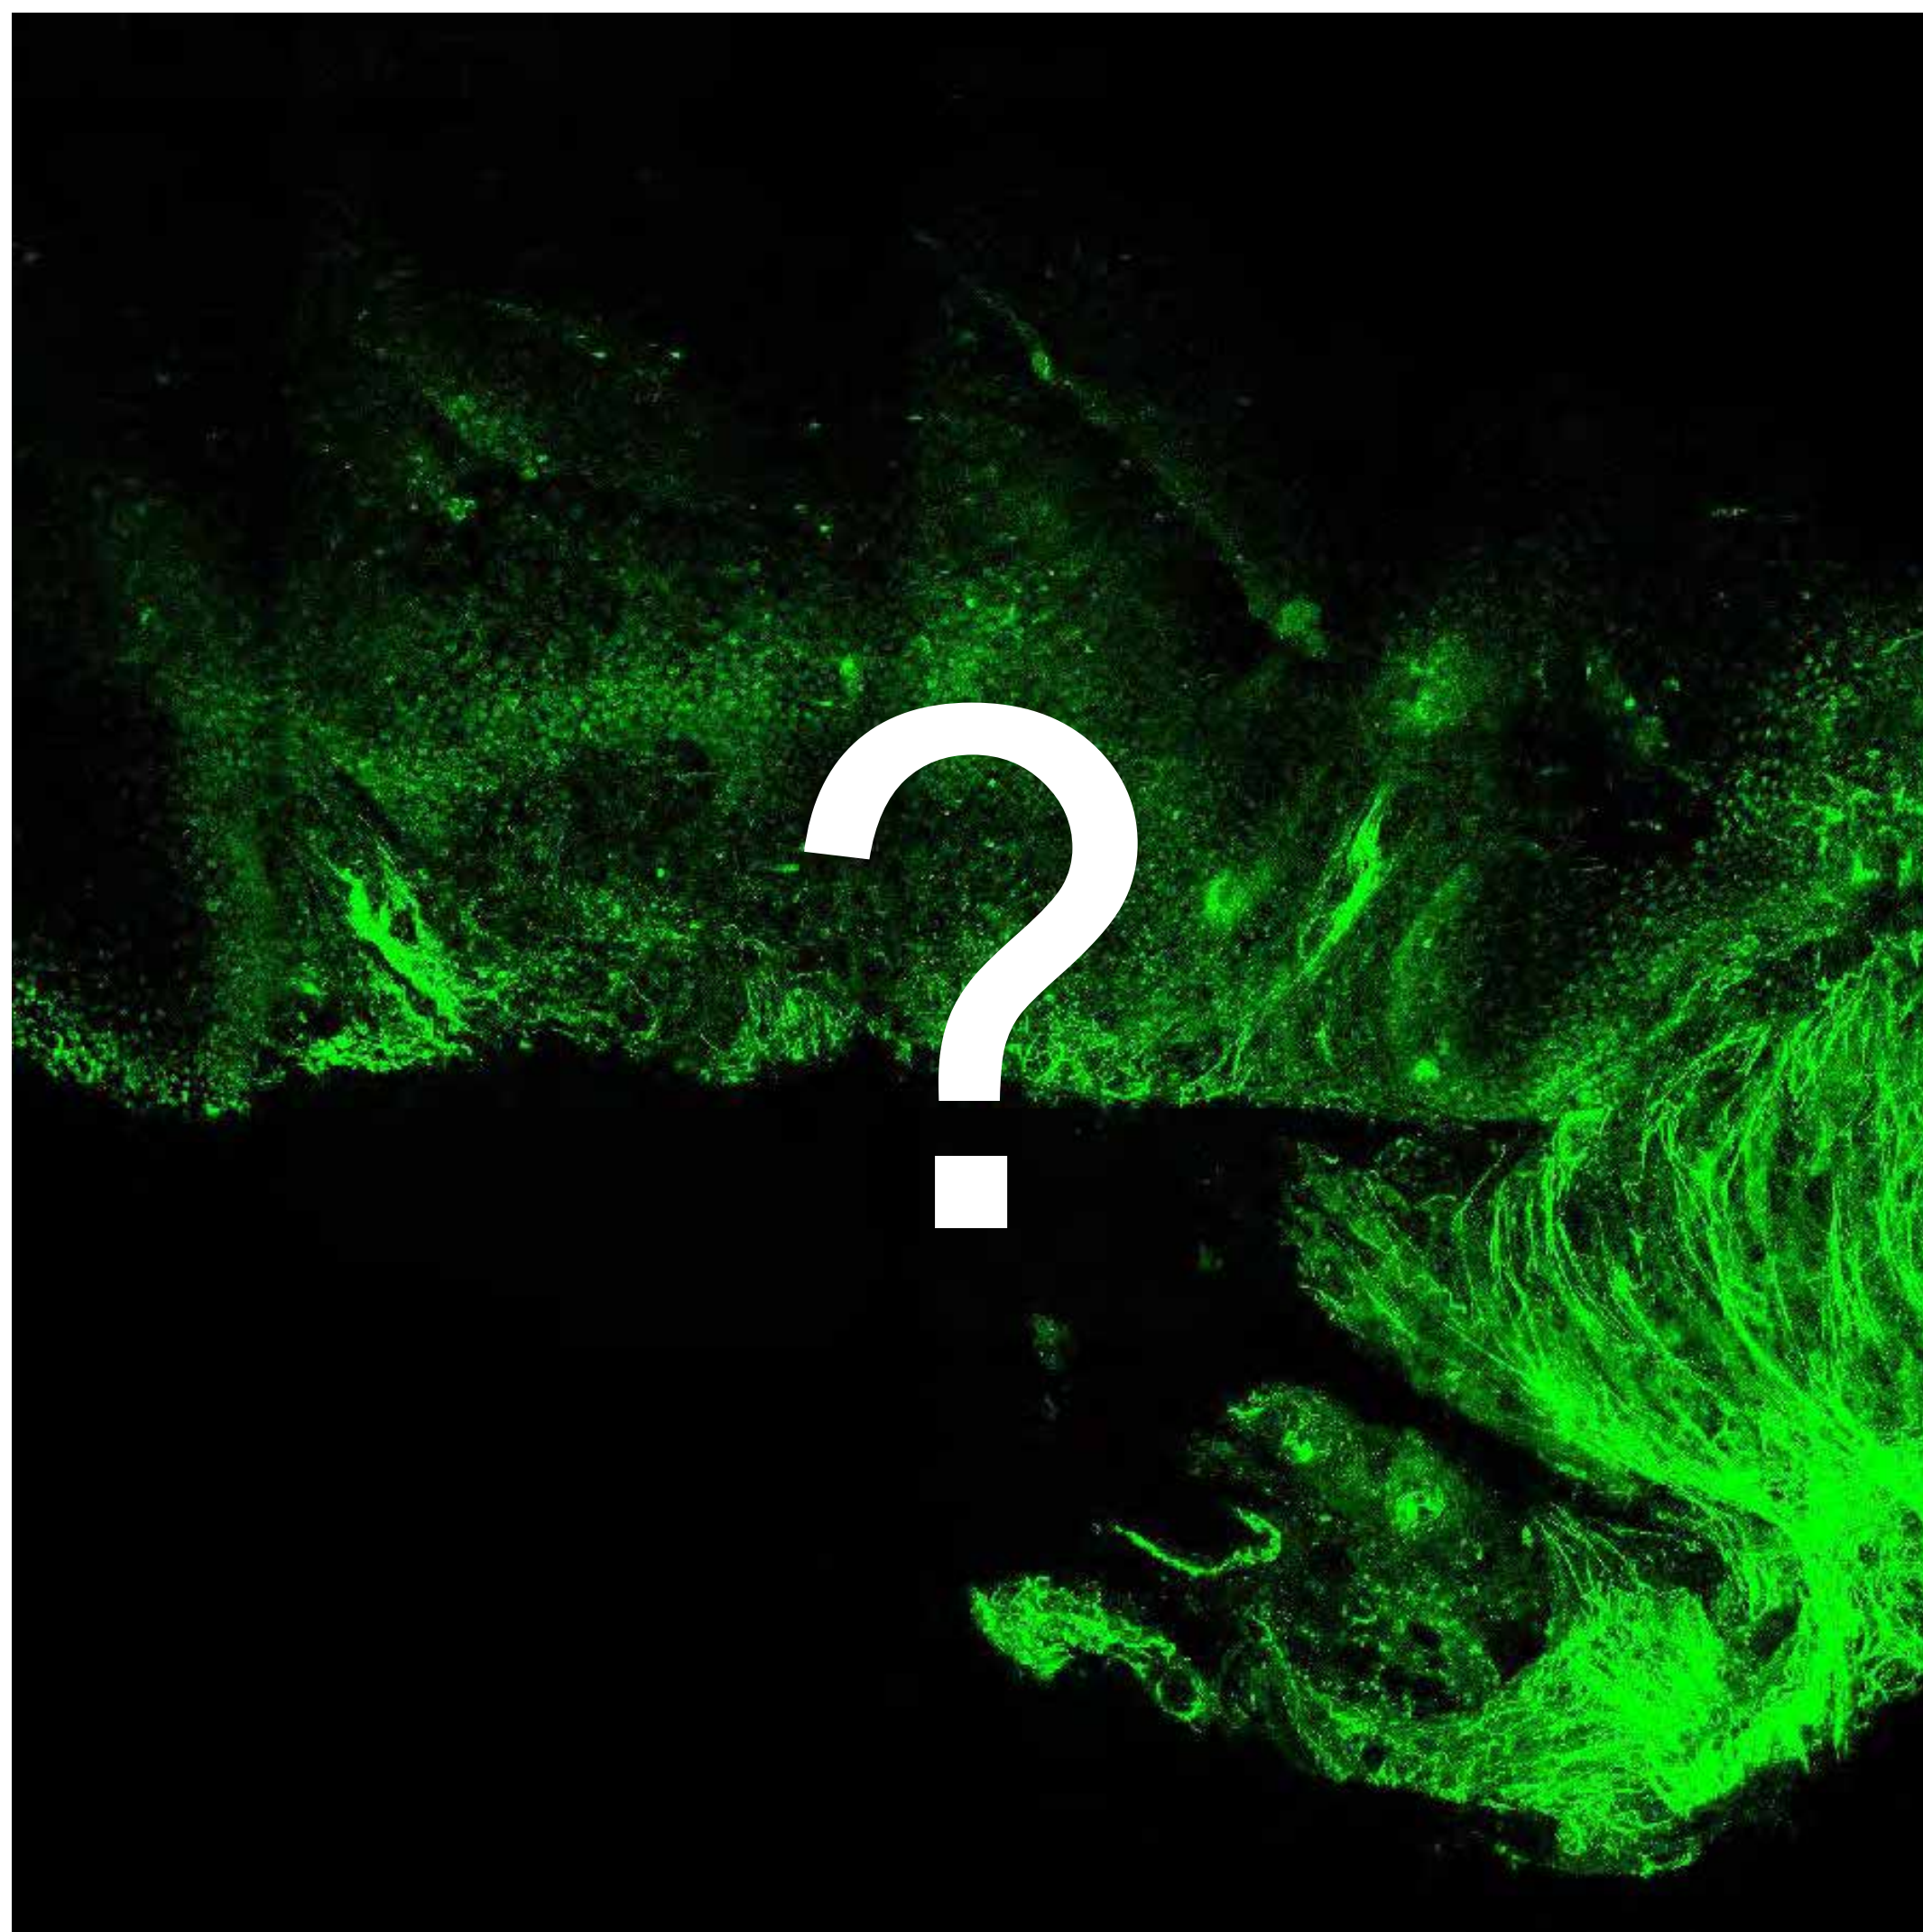

Tumor

Margin



3296

# Overview

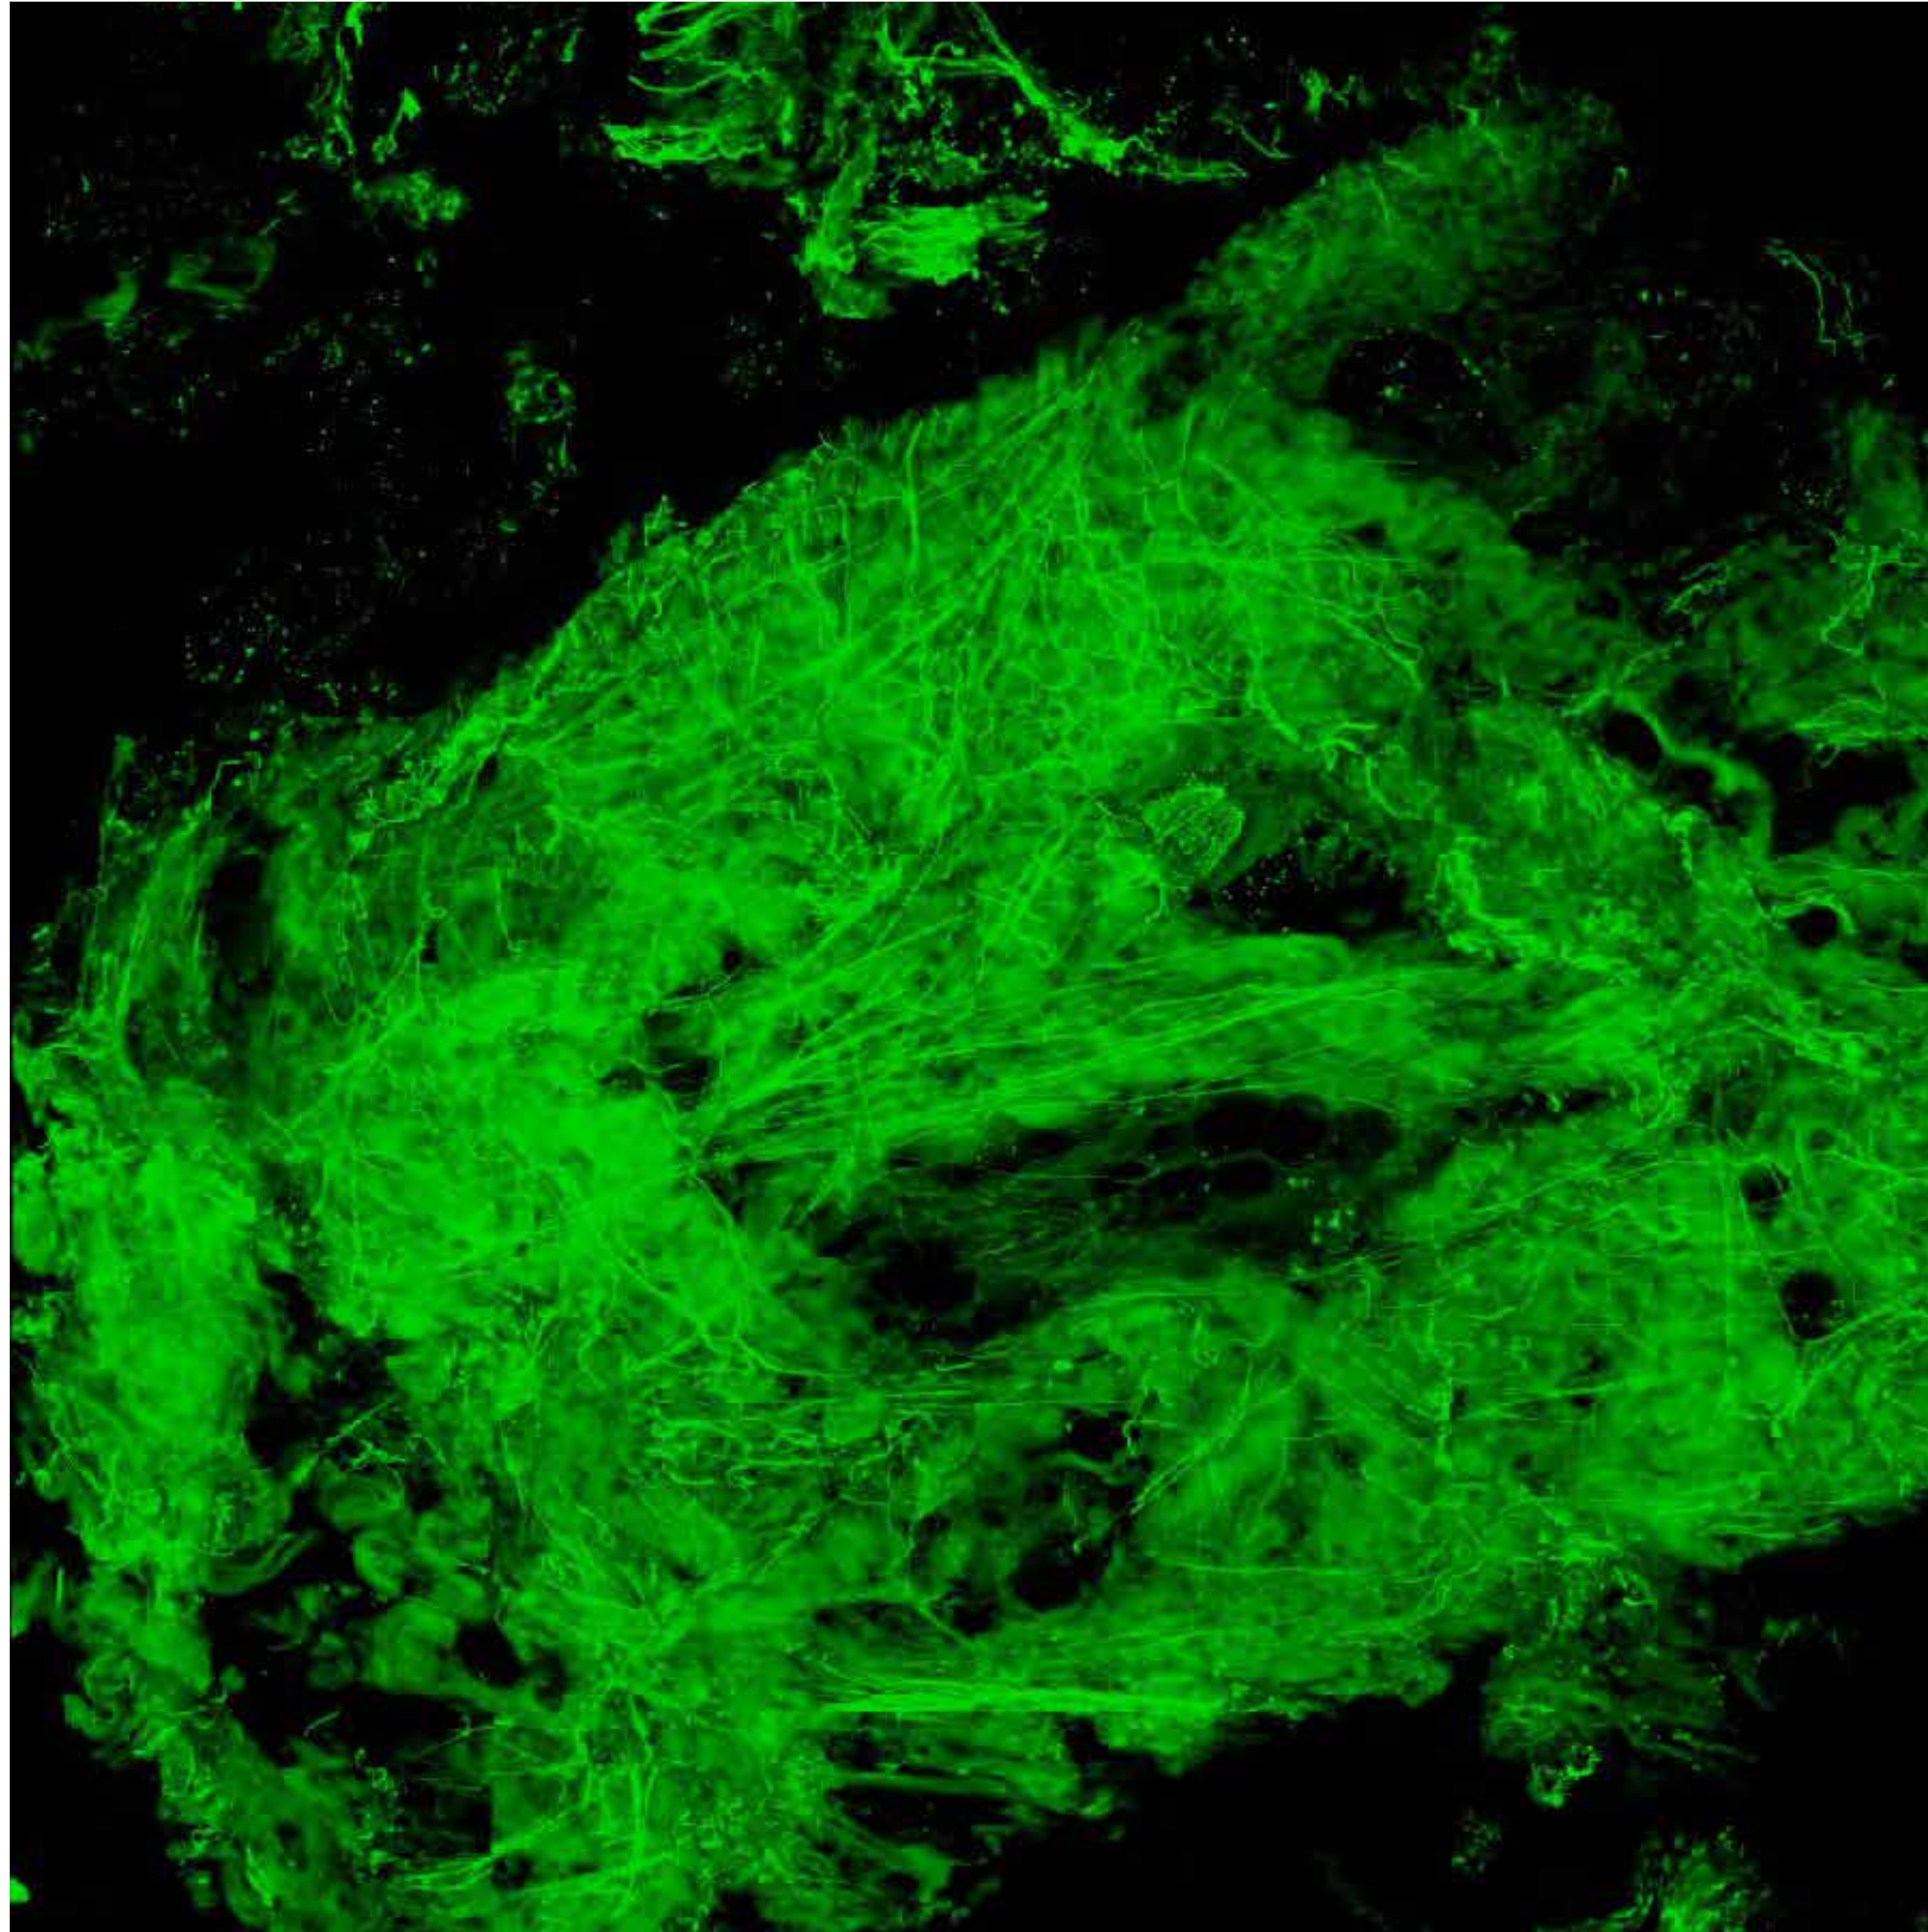

PARPi-FL only (green)

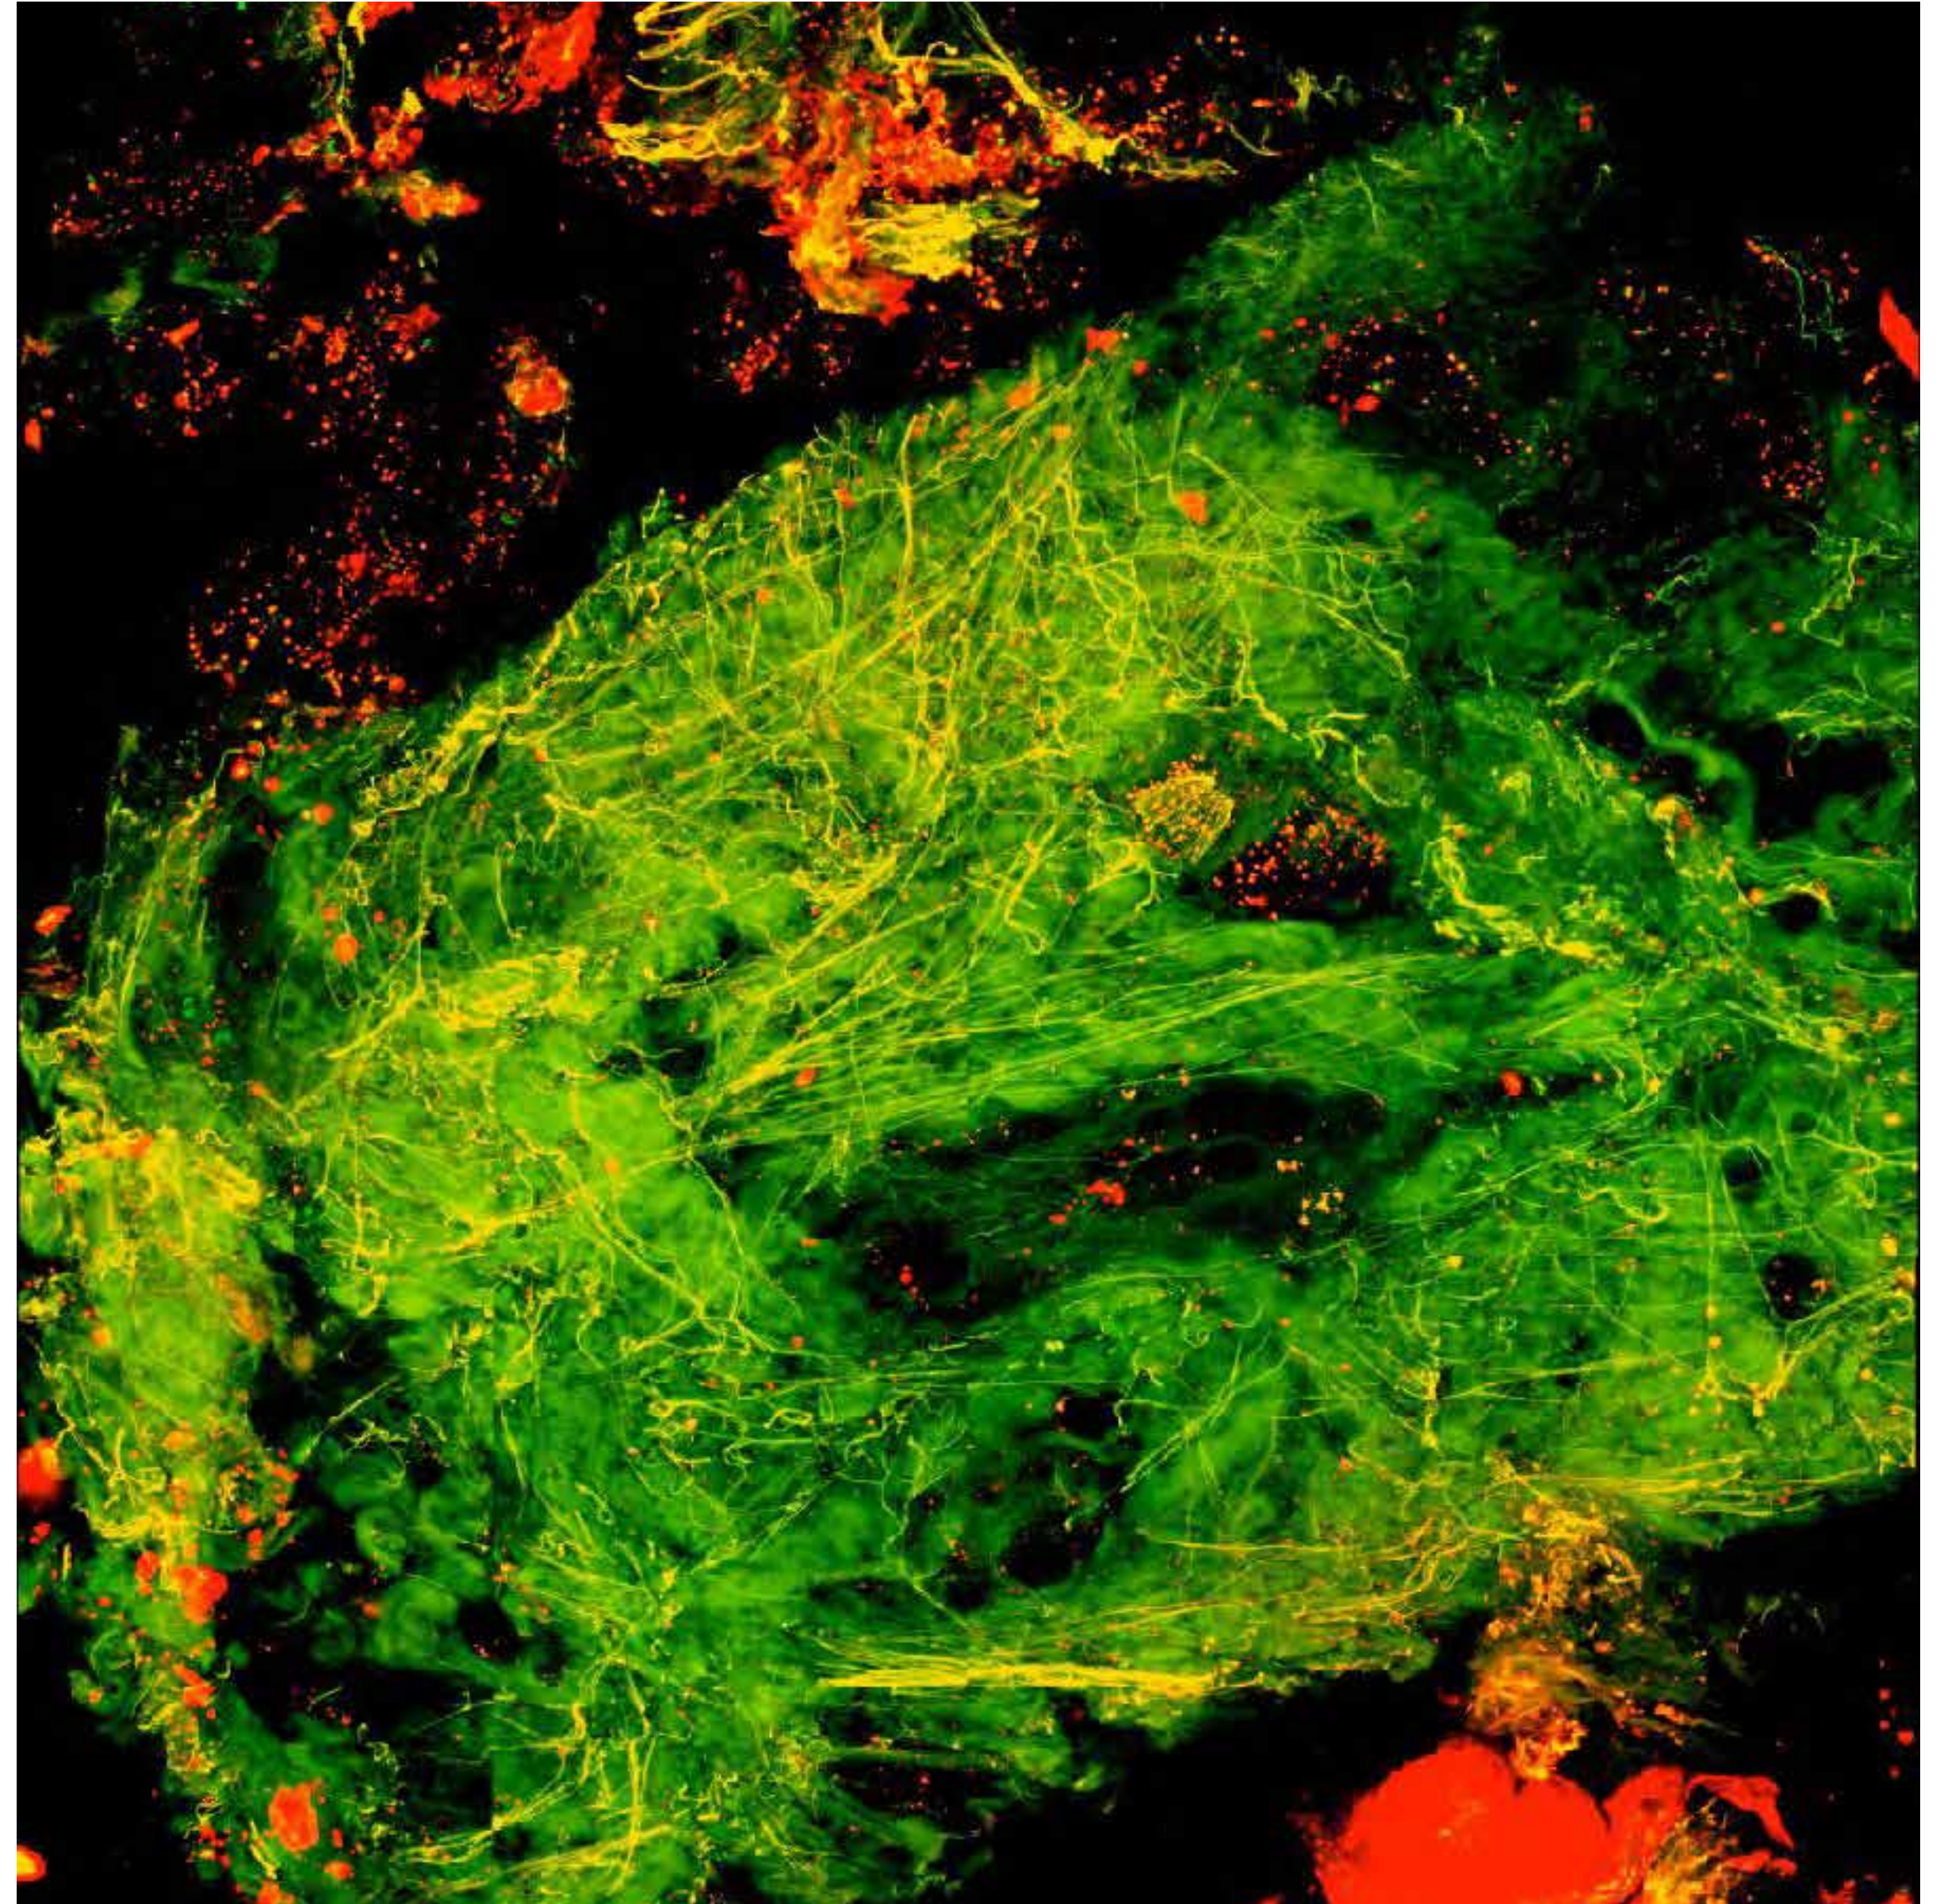

PARPi-FL (green) + Autofluorescence (red/yellow)



3296

Close-up

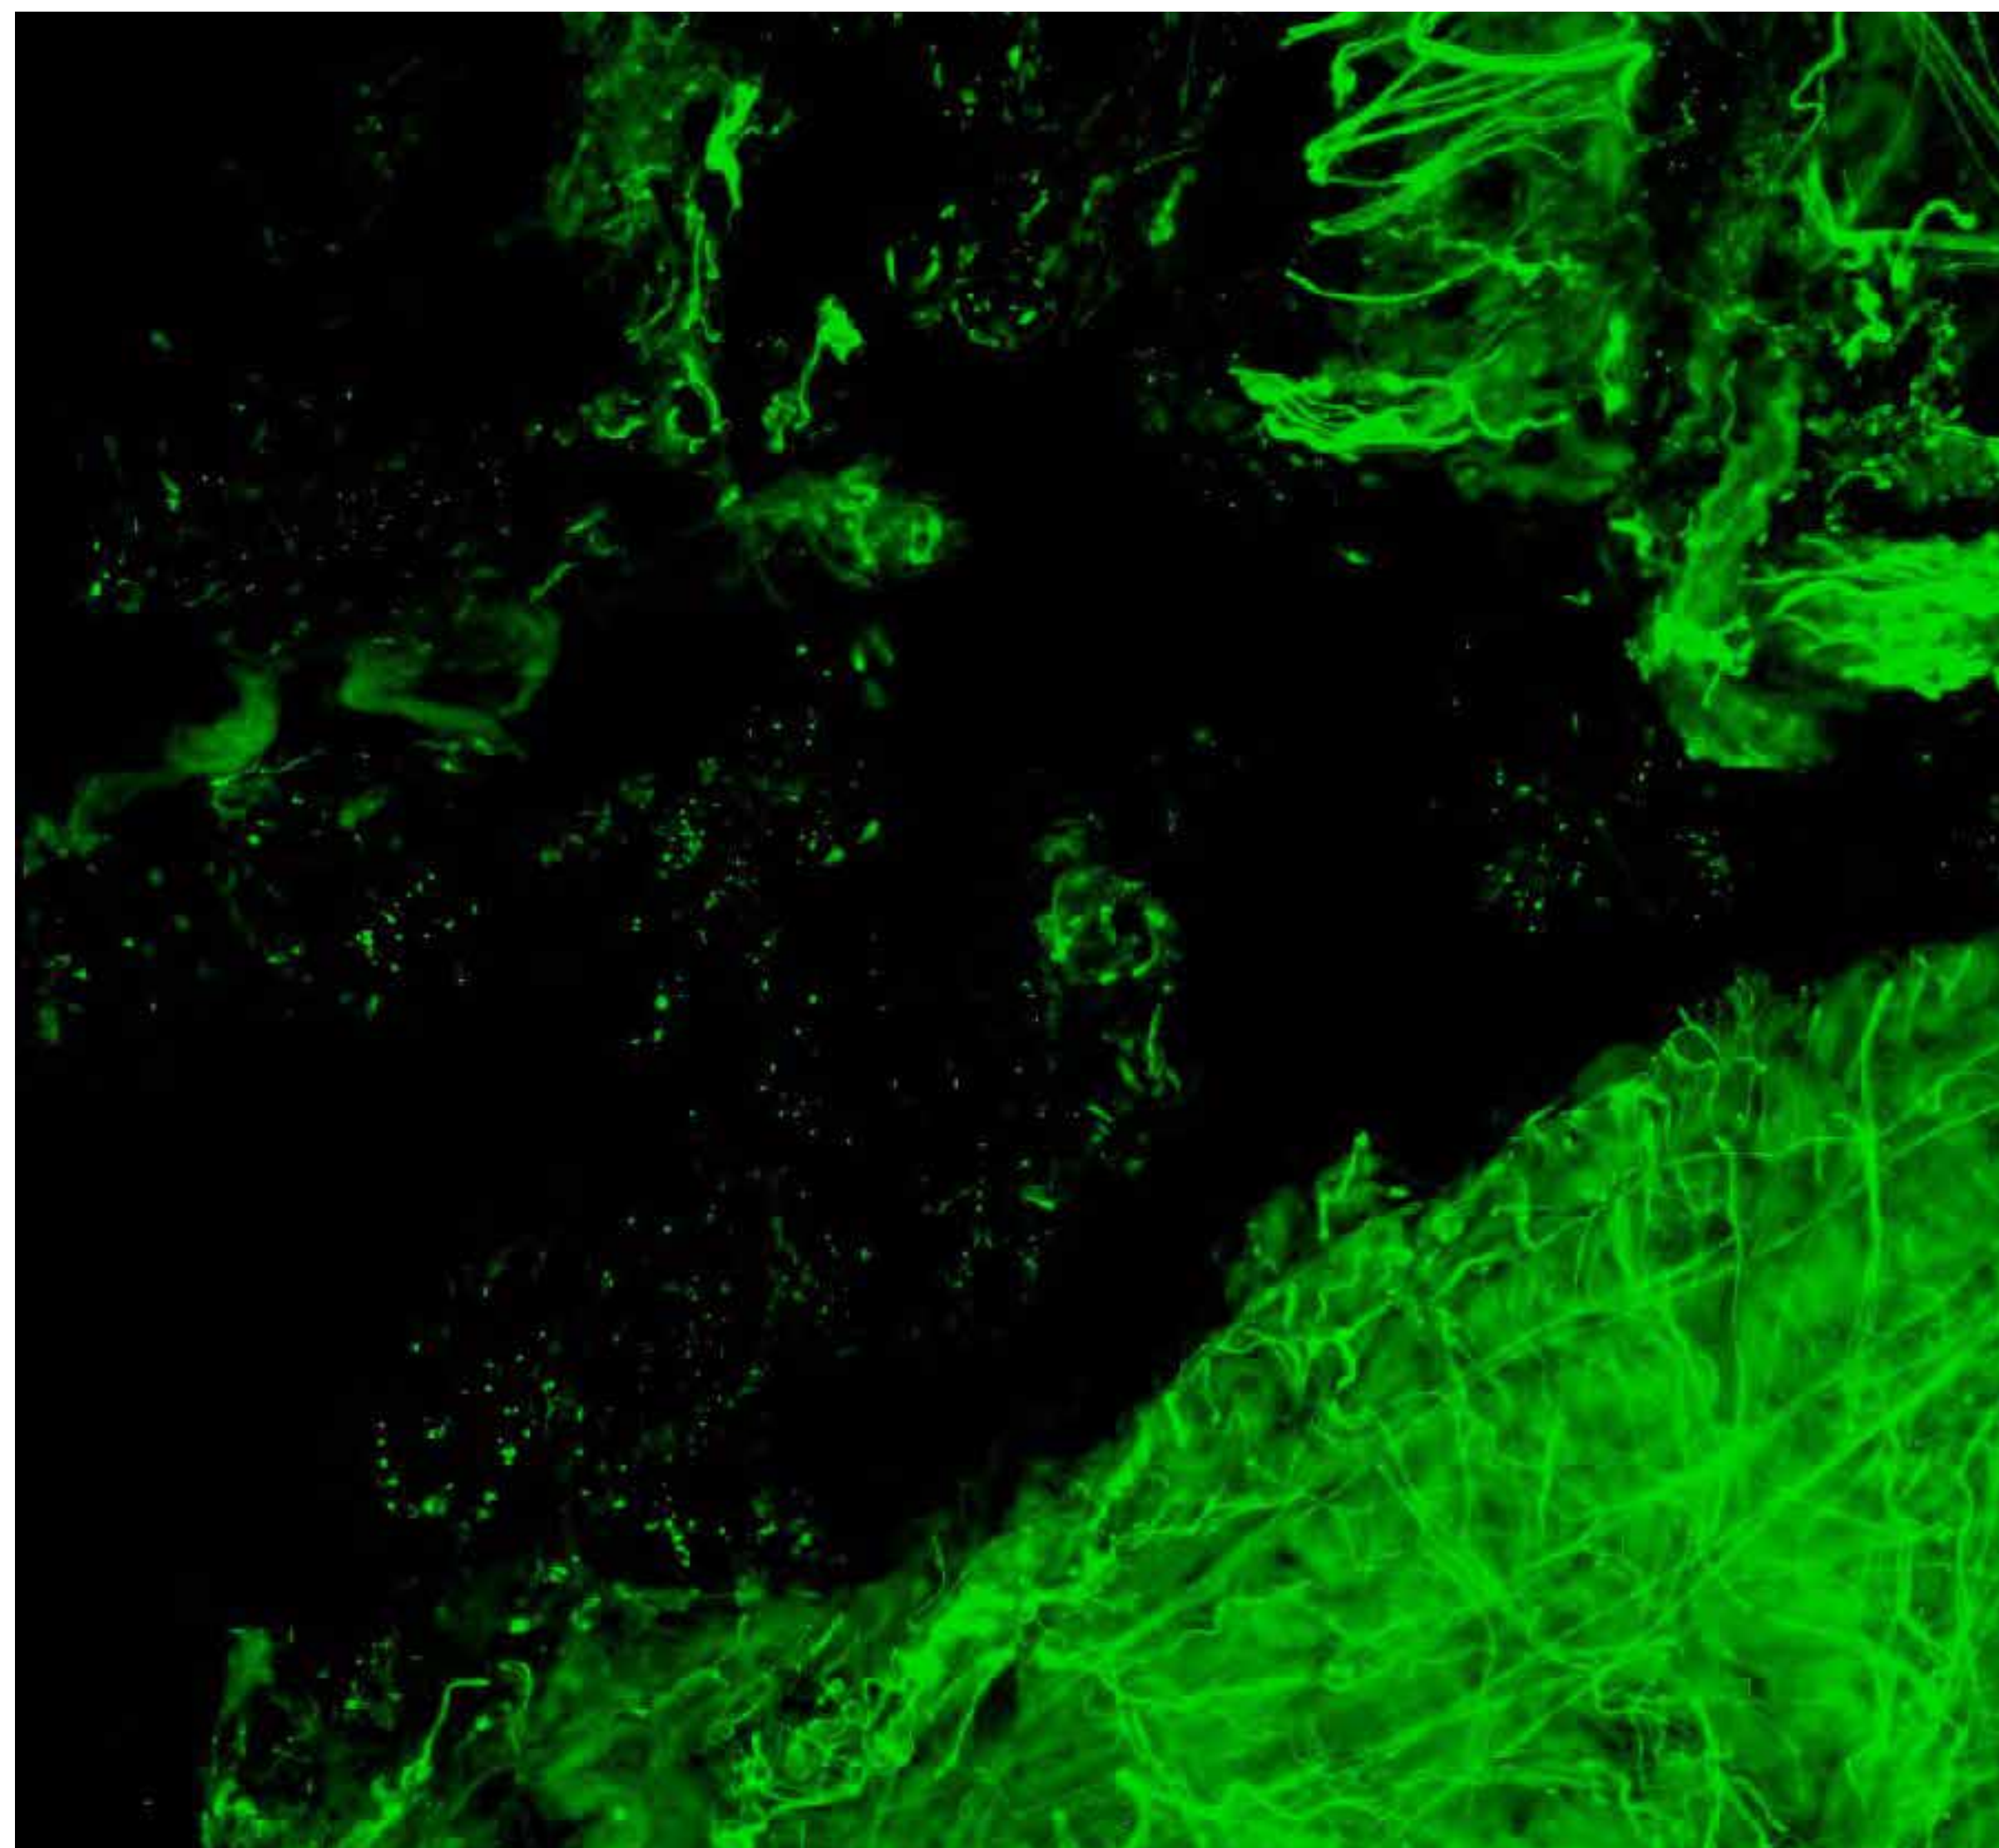

PARPi-FL only (green)

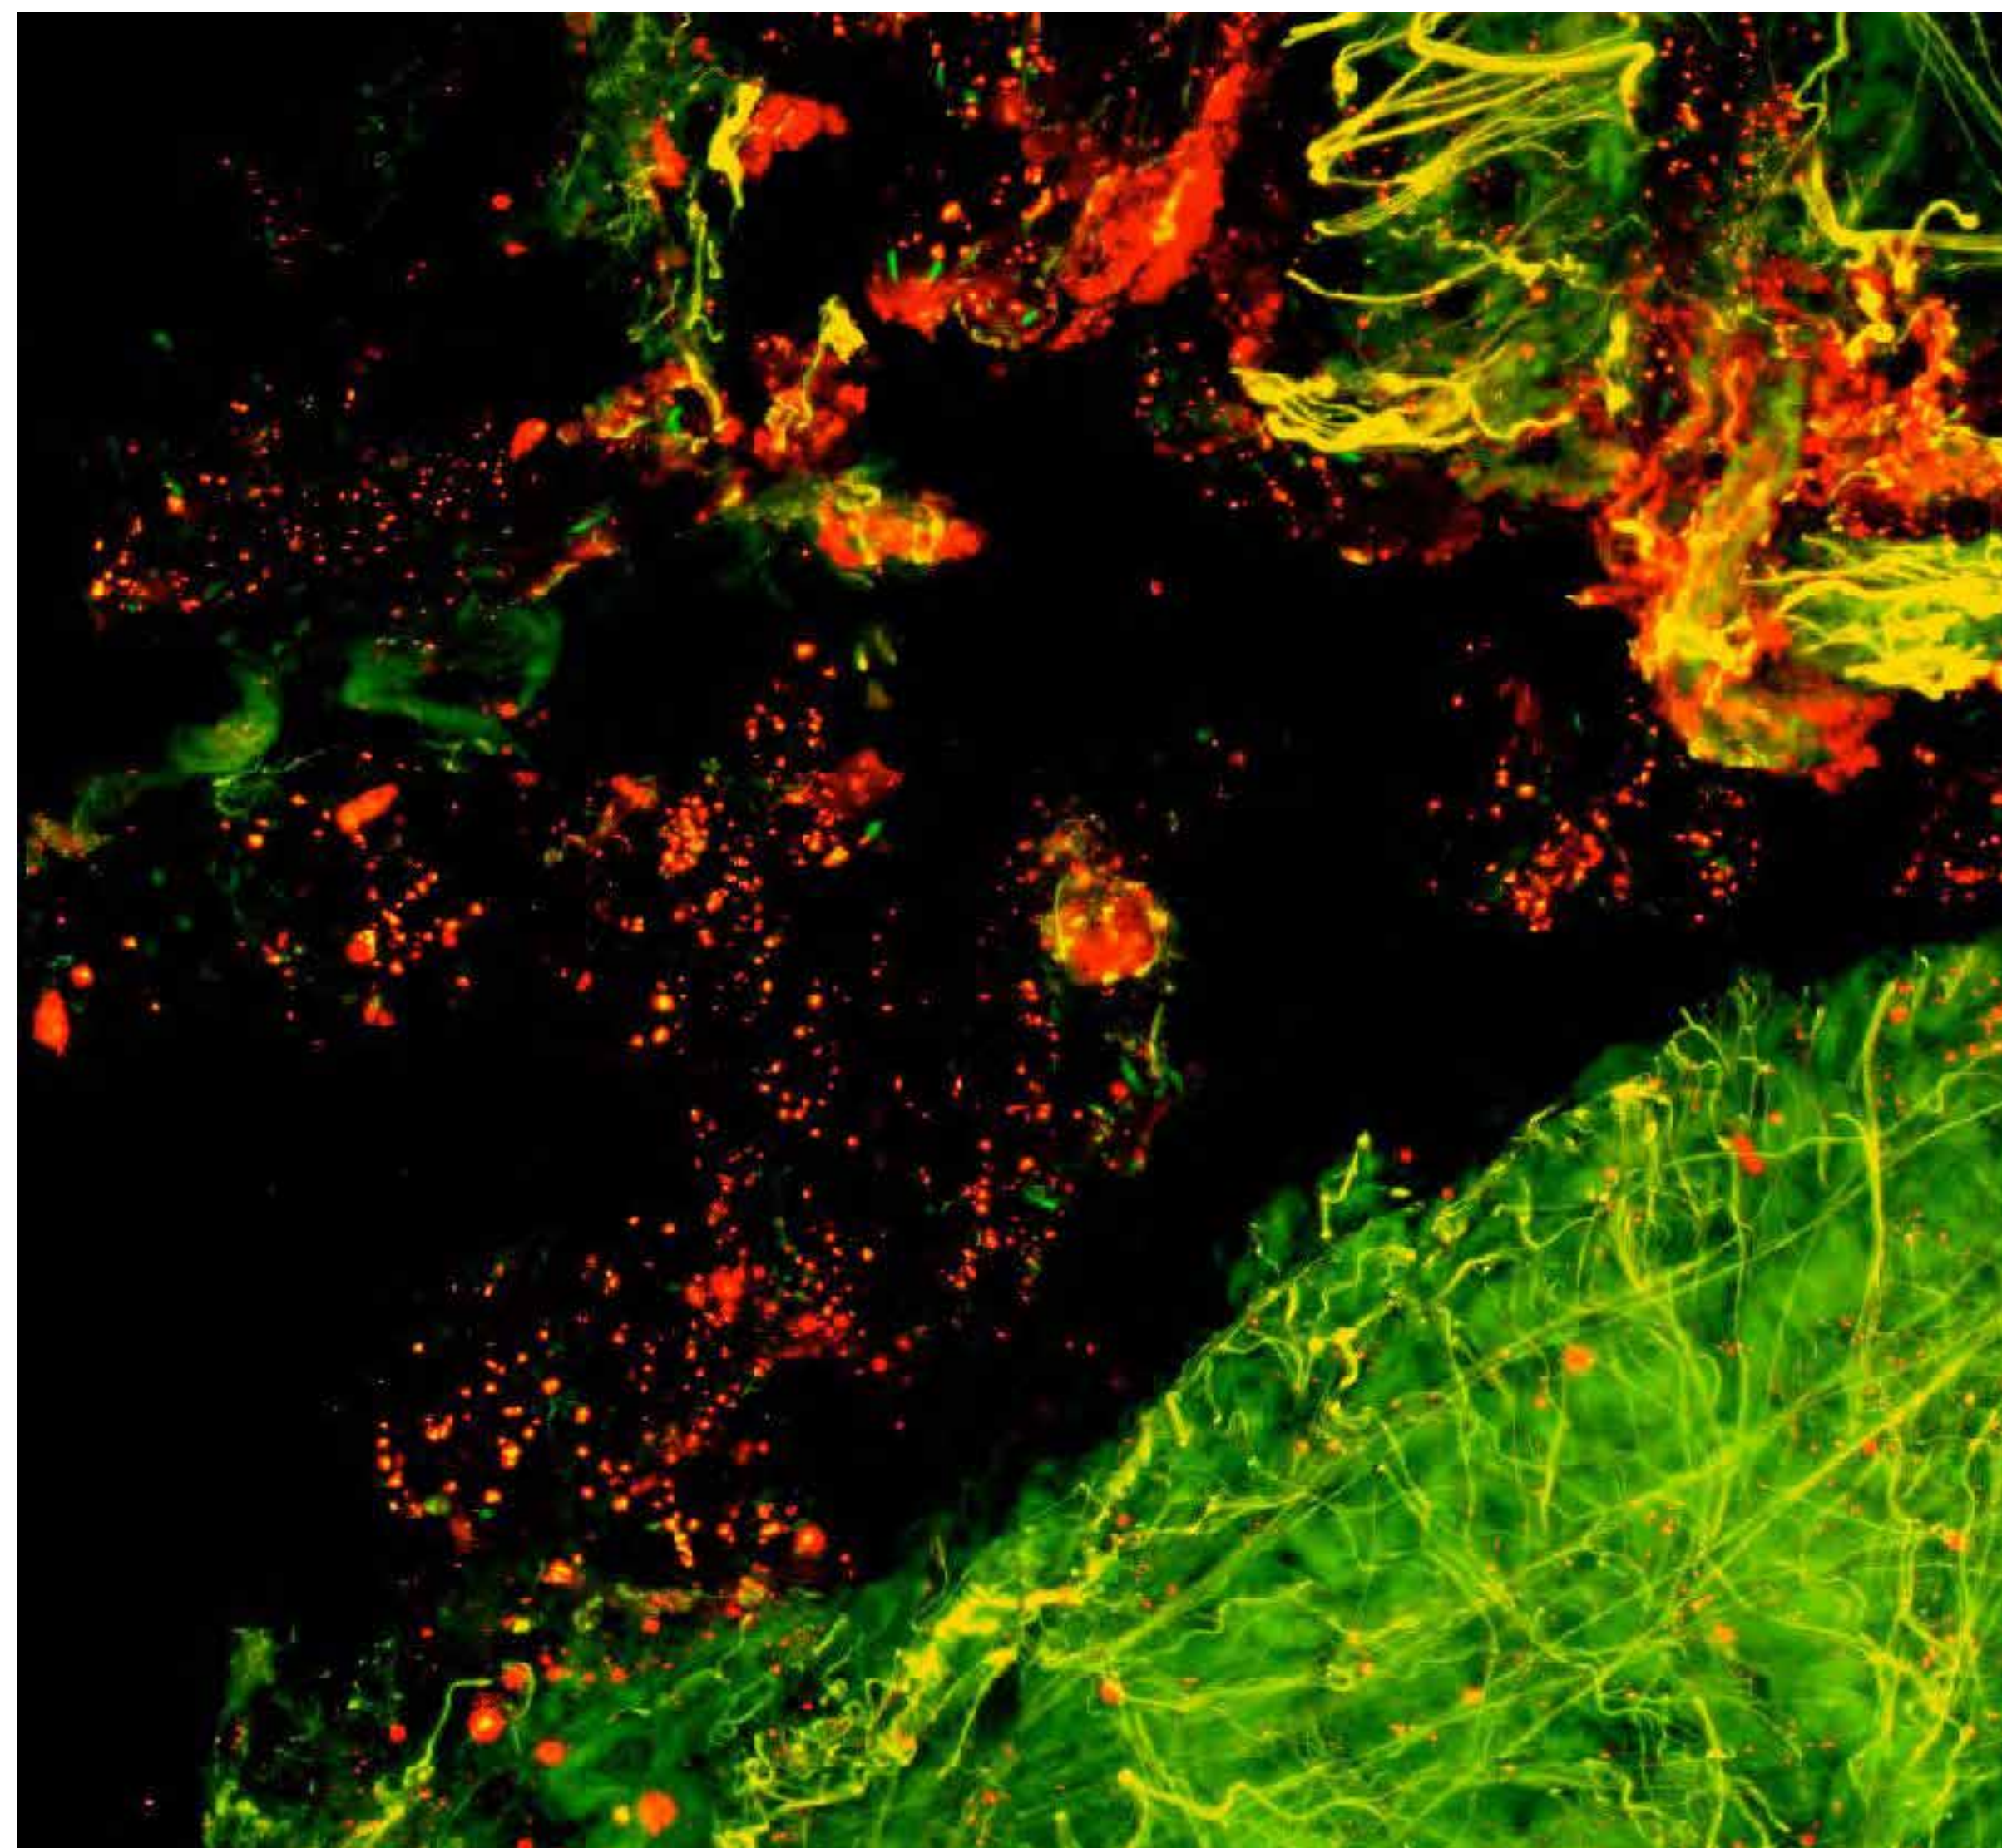

PARPi-FL (green) + Autofluorescence (red/yellow)



3296

Close-up

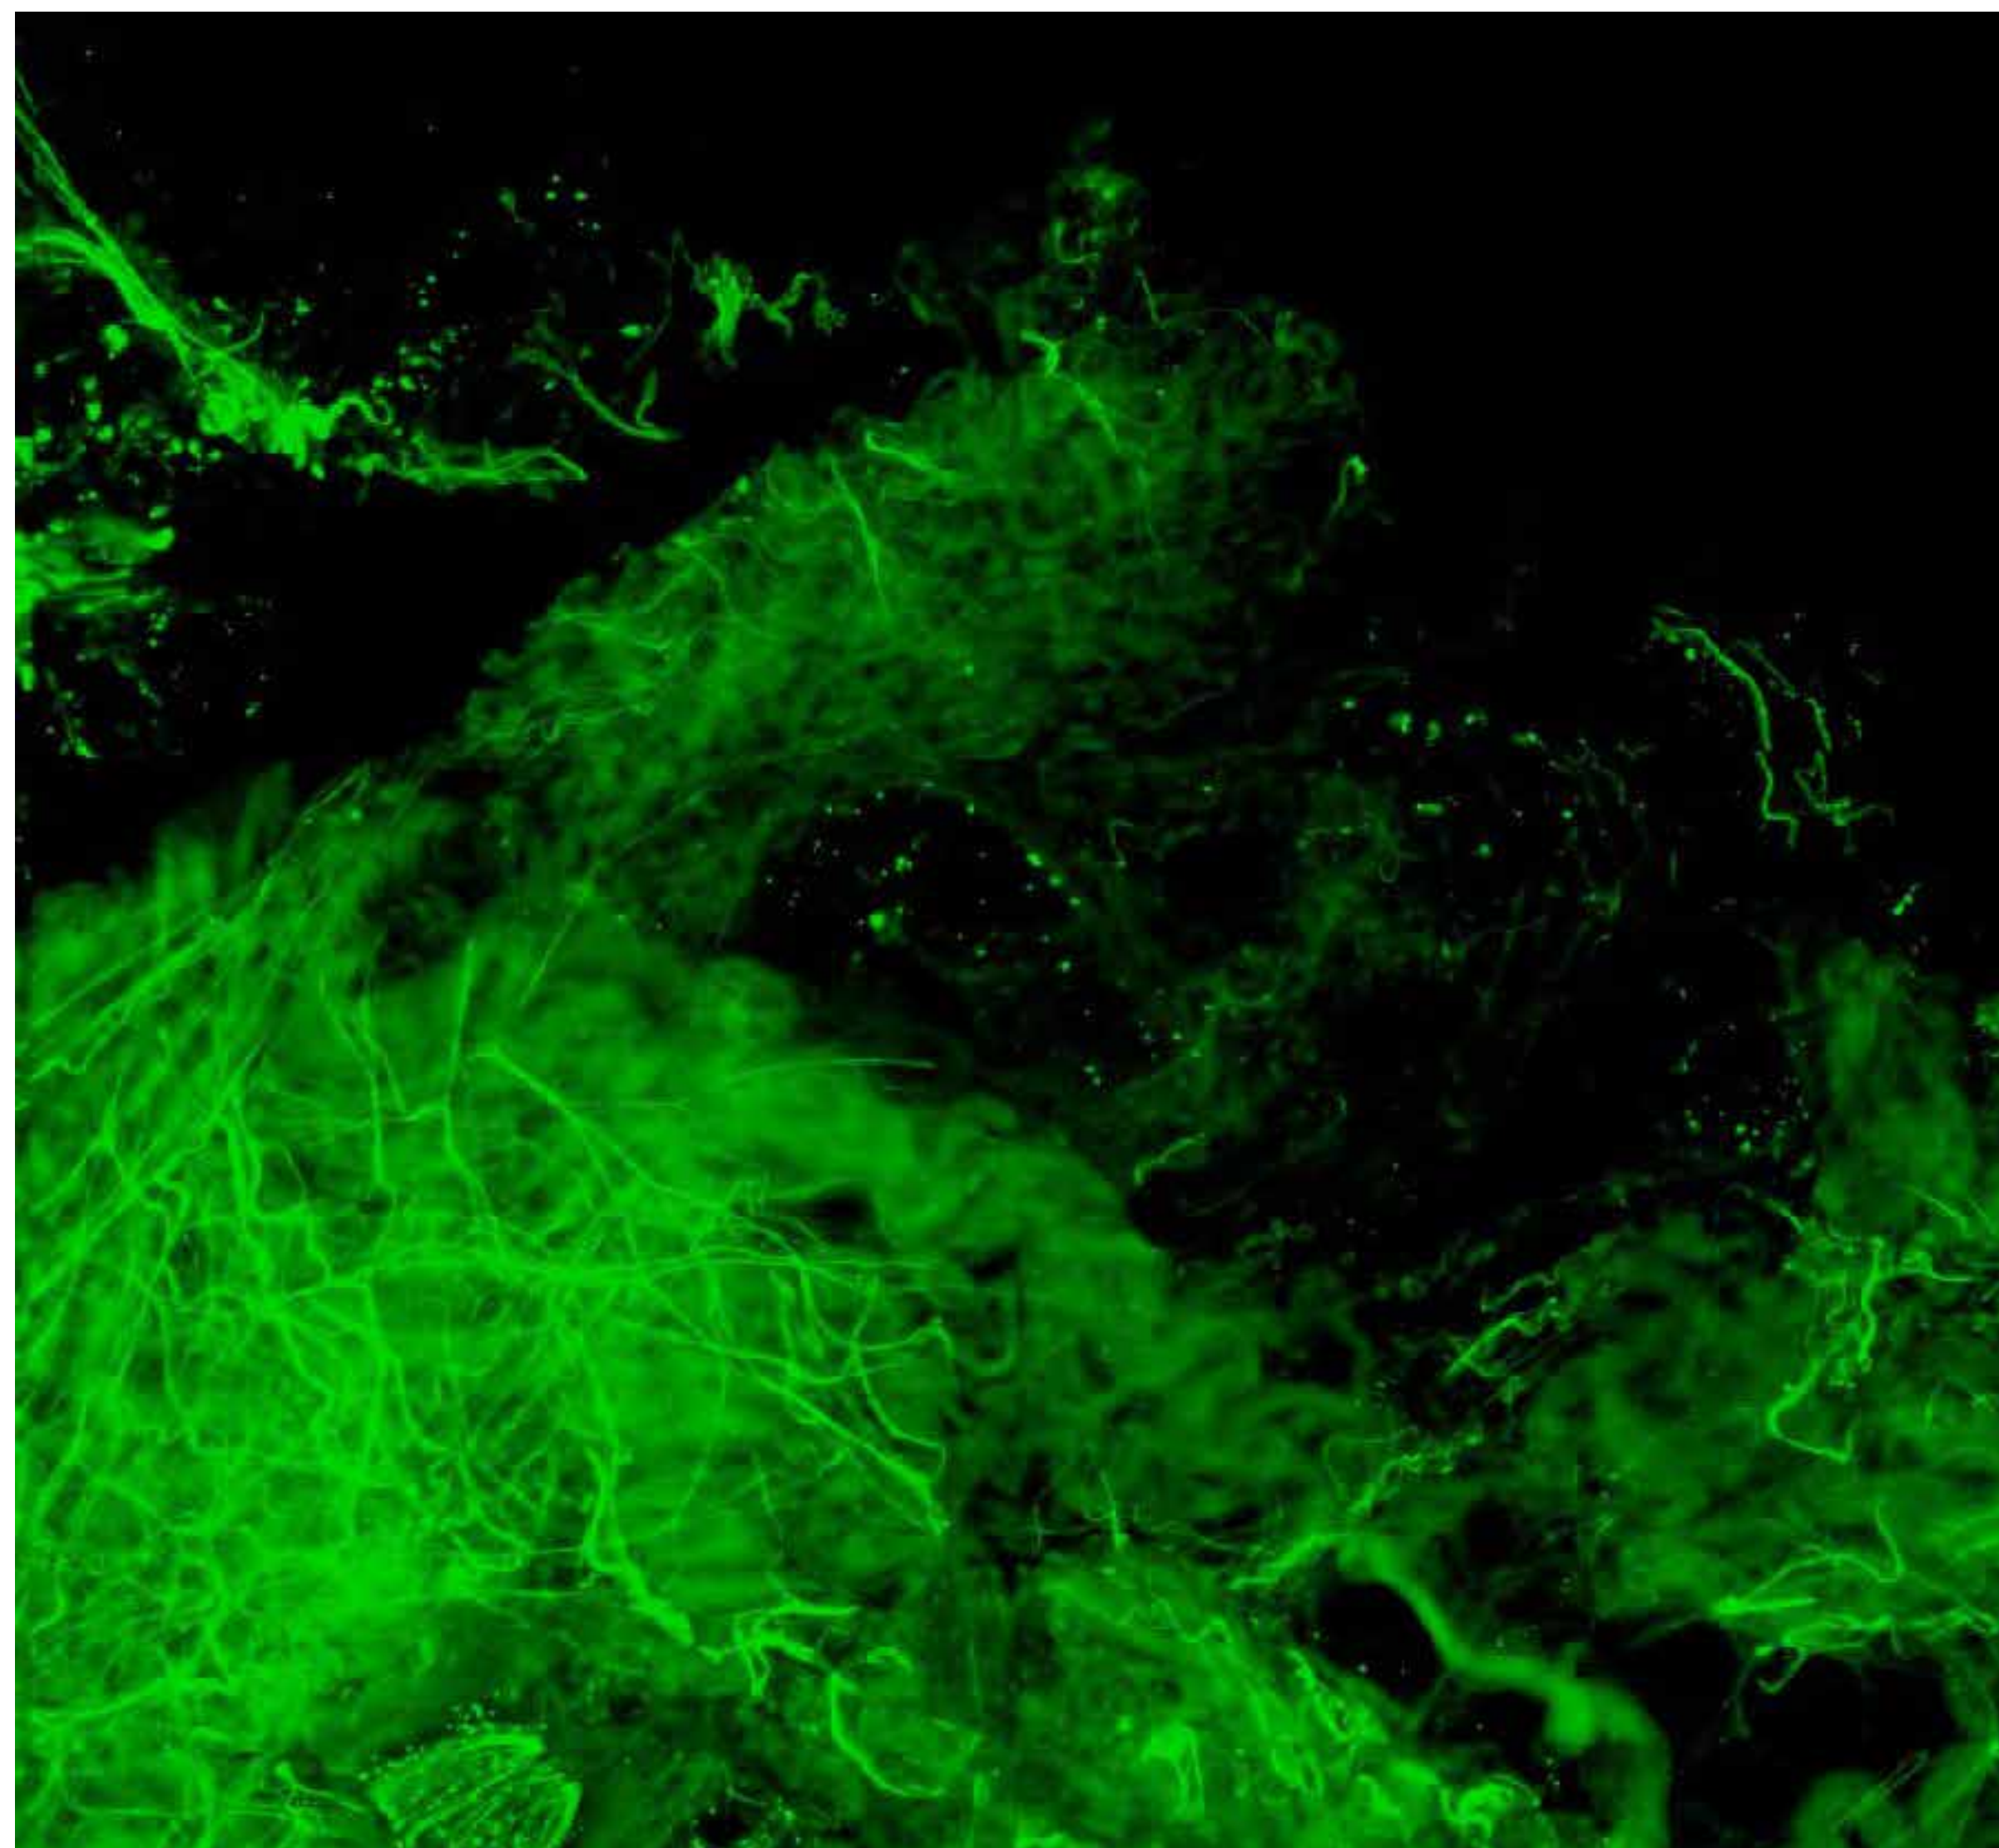

PARPi-FL only (green)

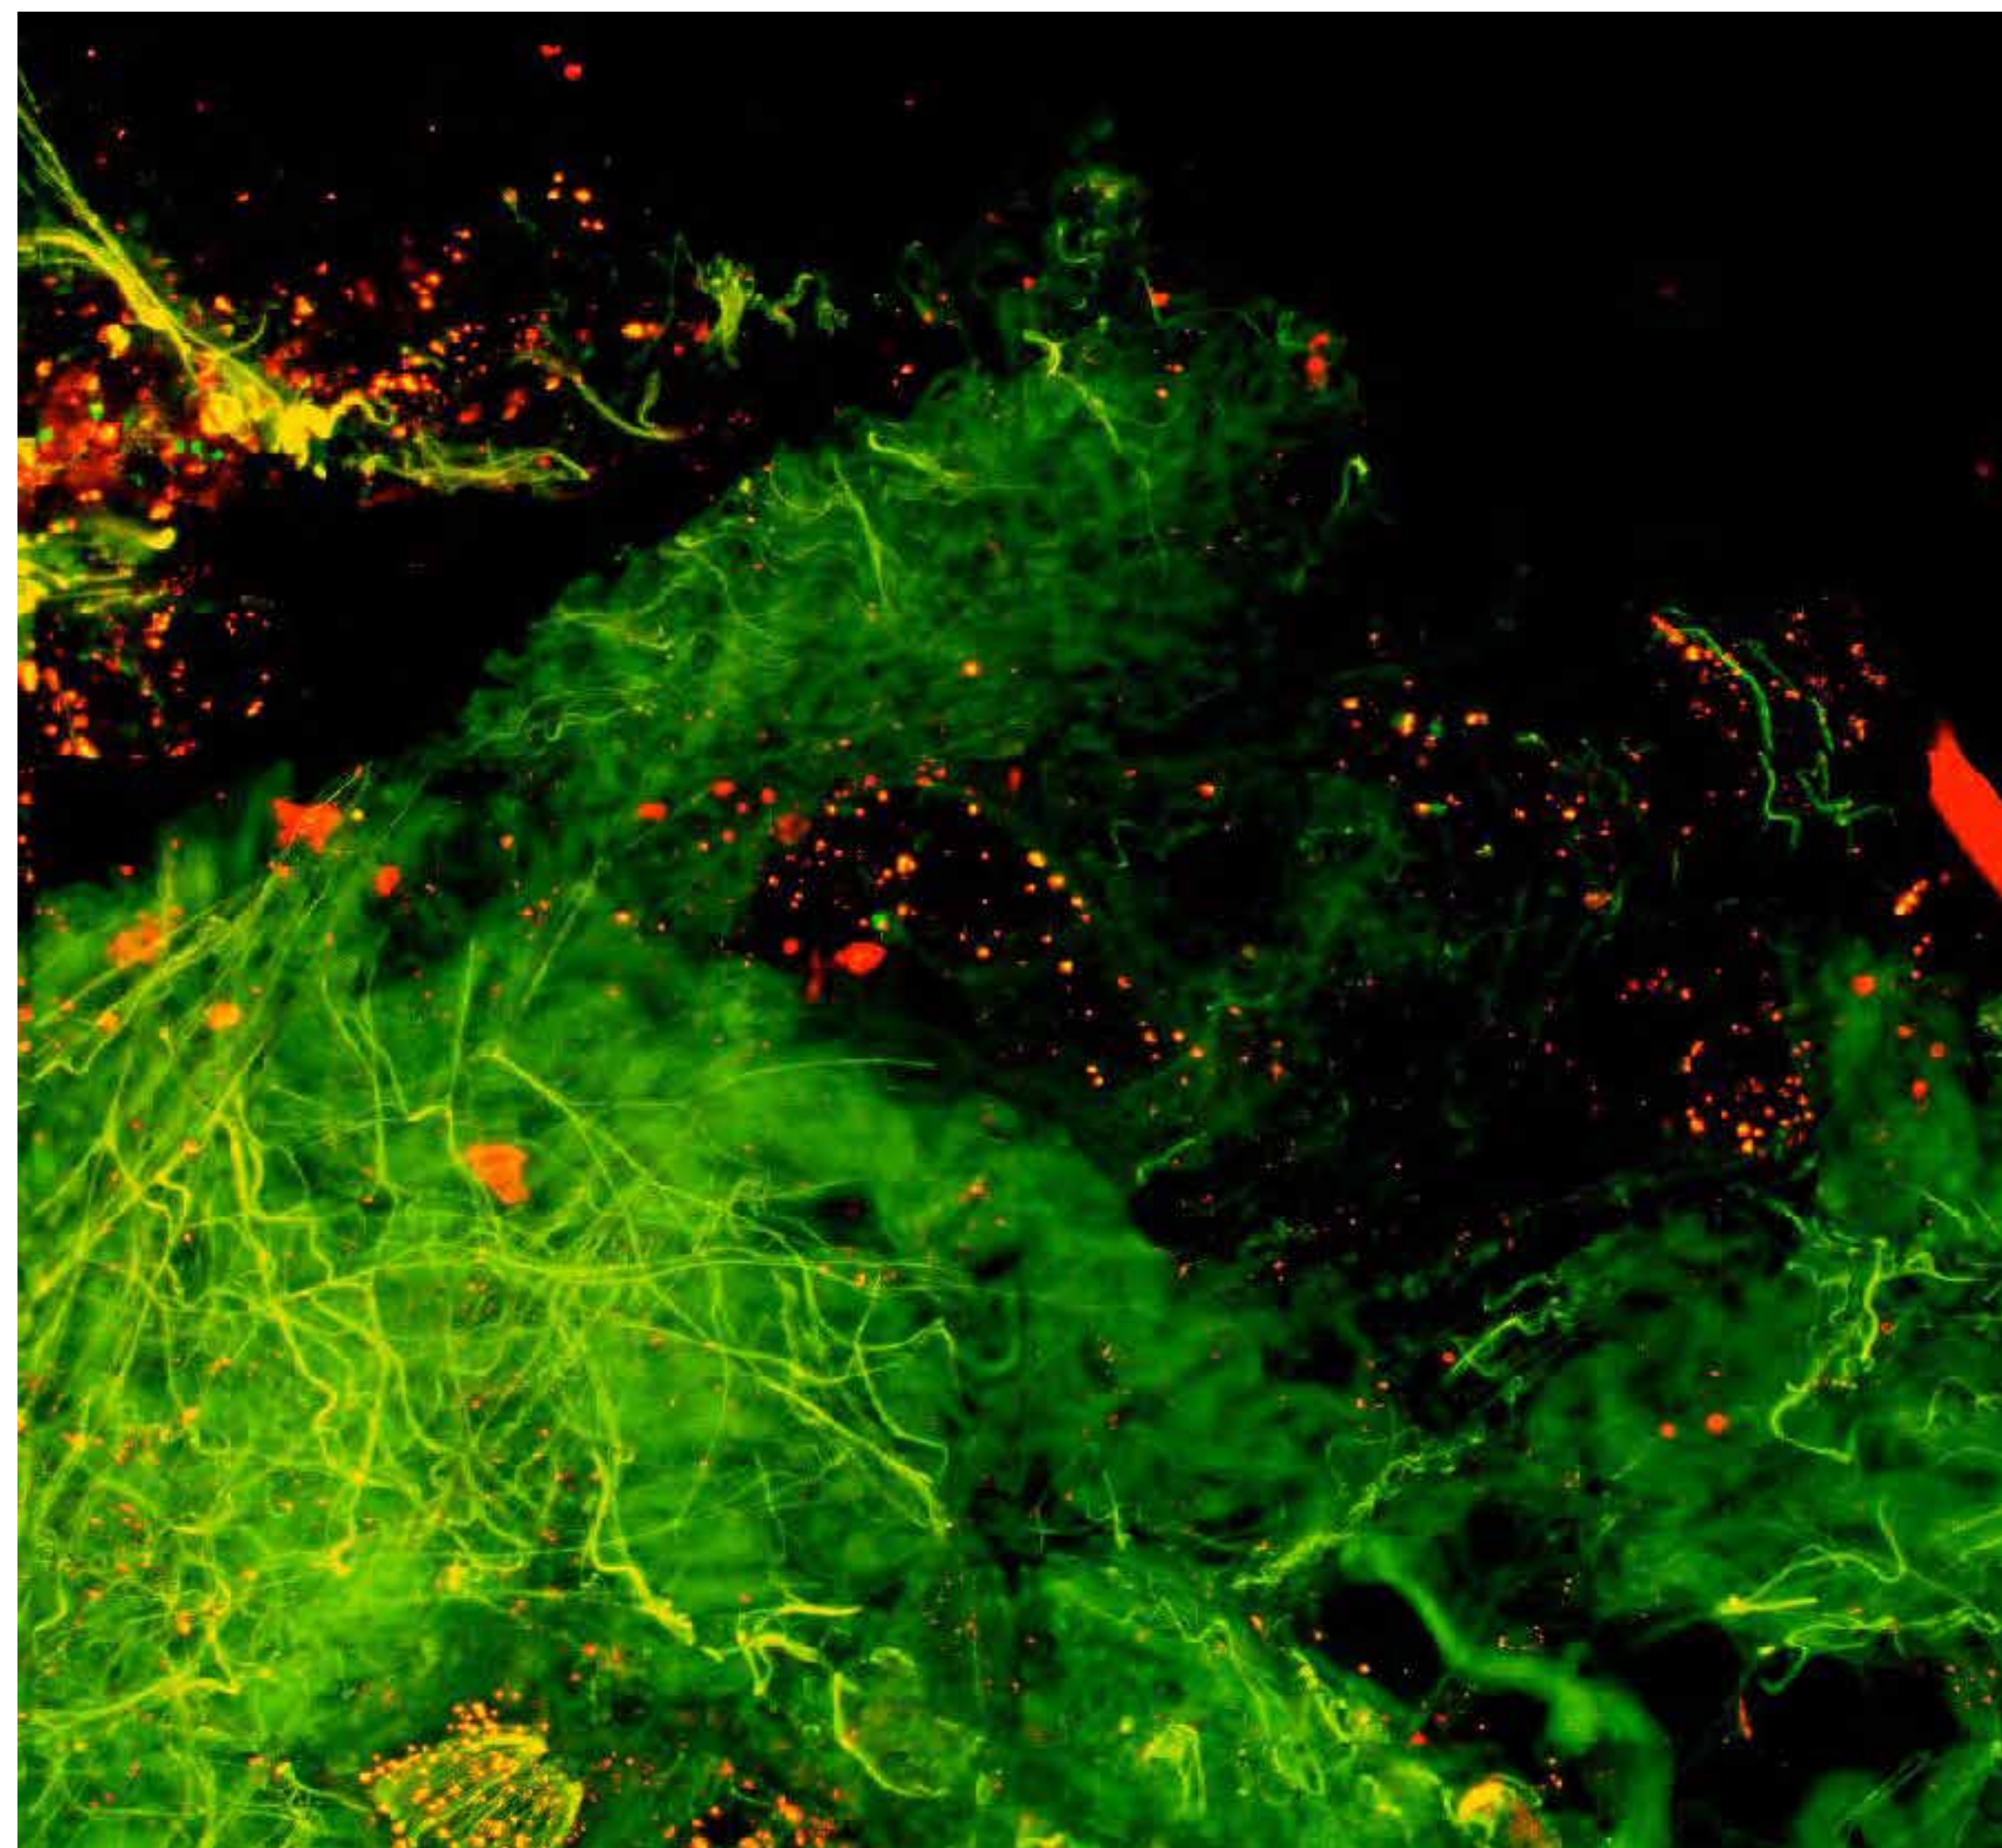

PARPi-FL (green) + Autofluorescence (red/yellow)



3296

Close-up

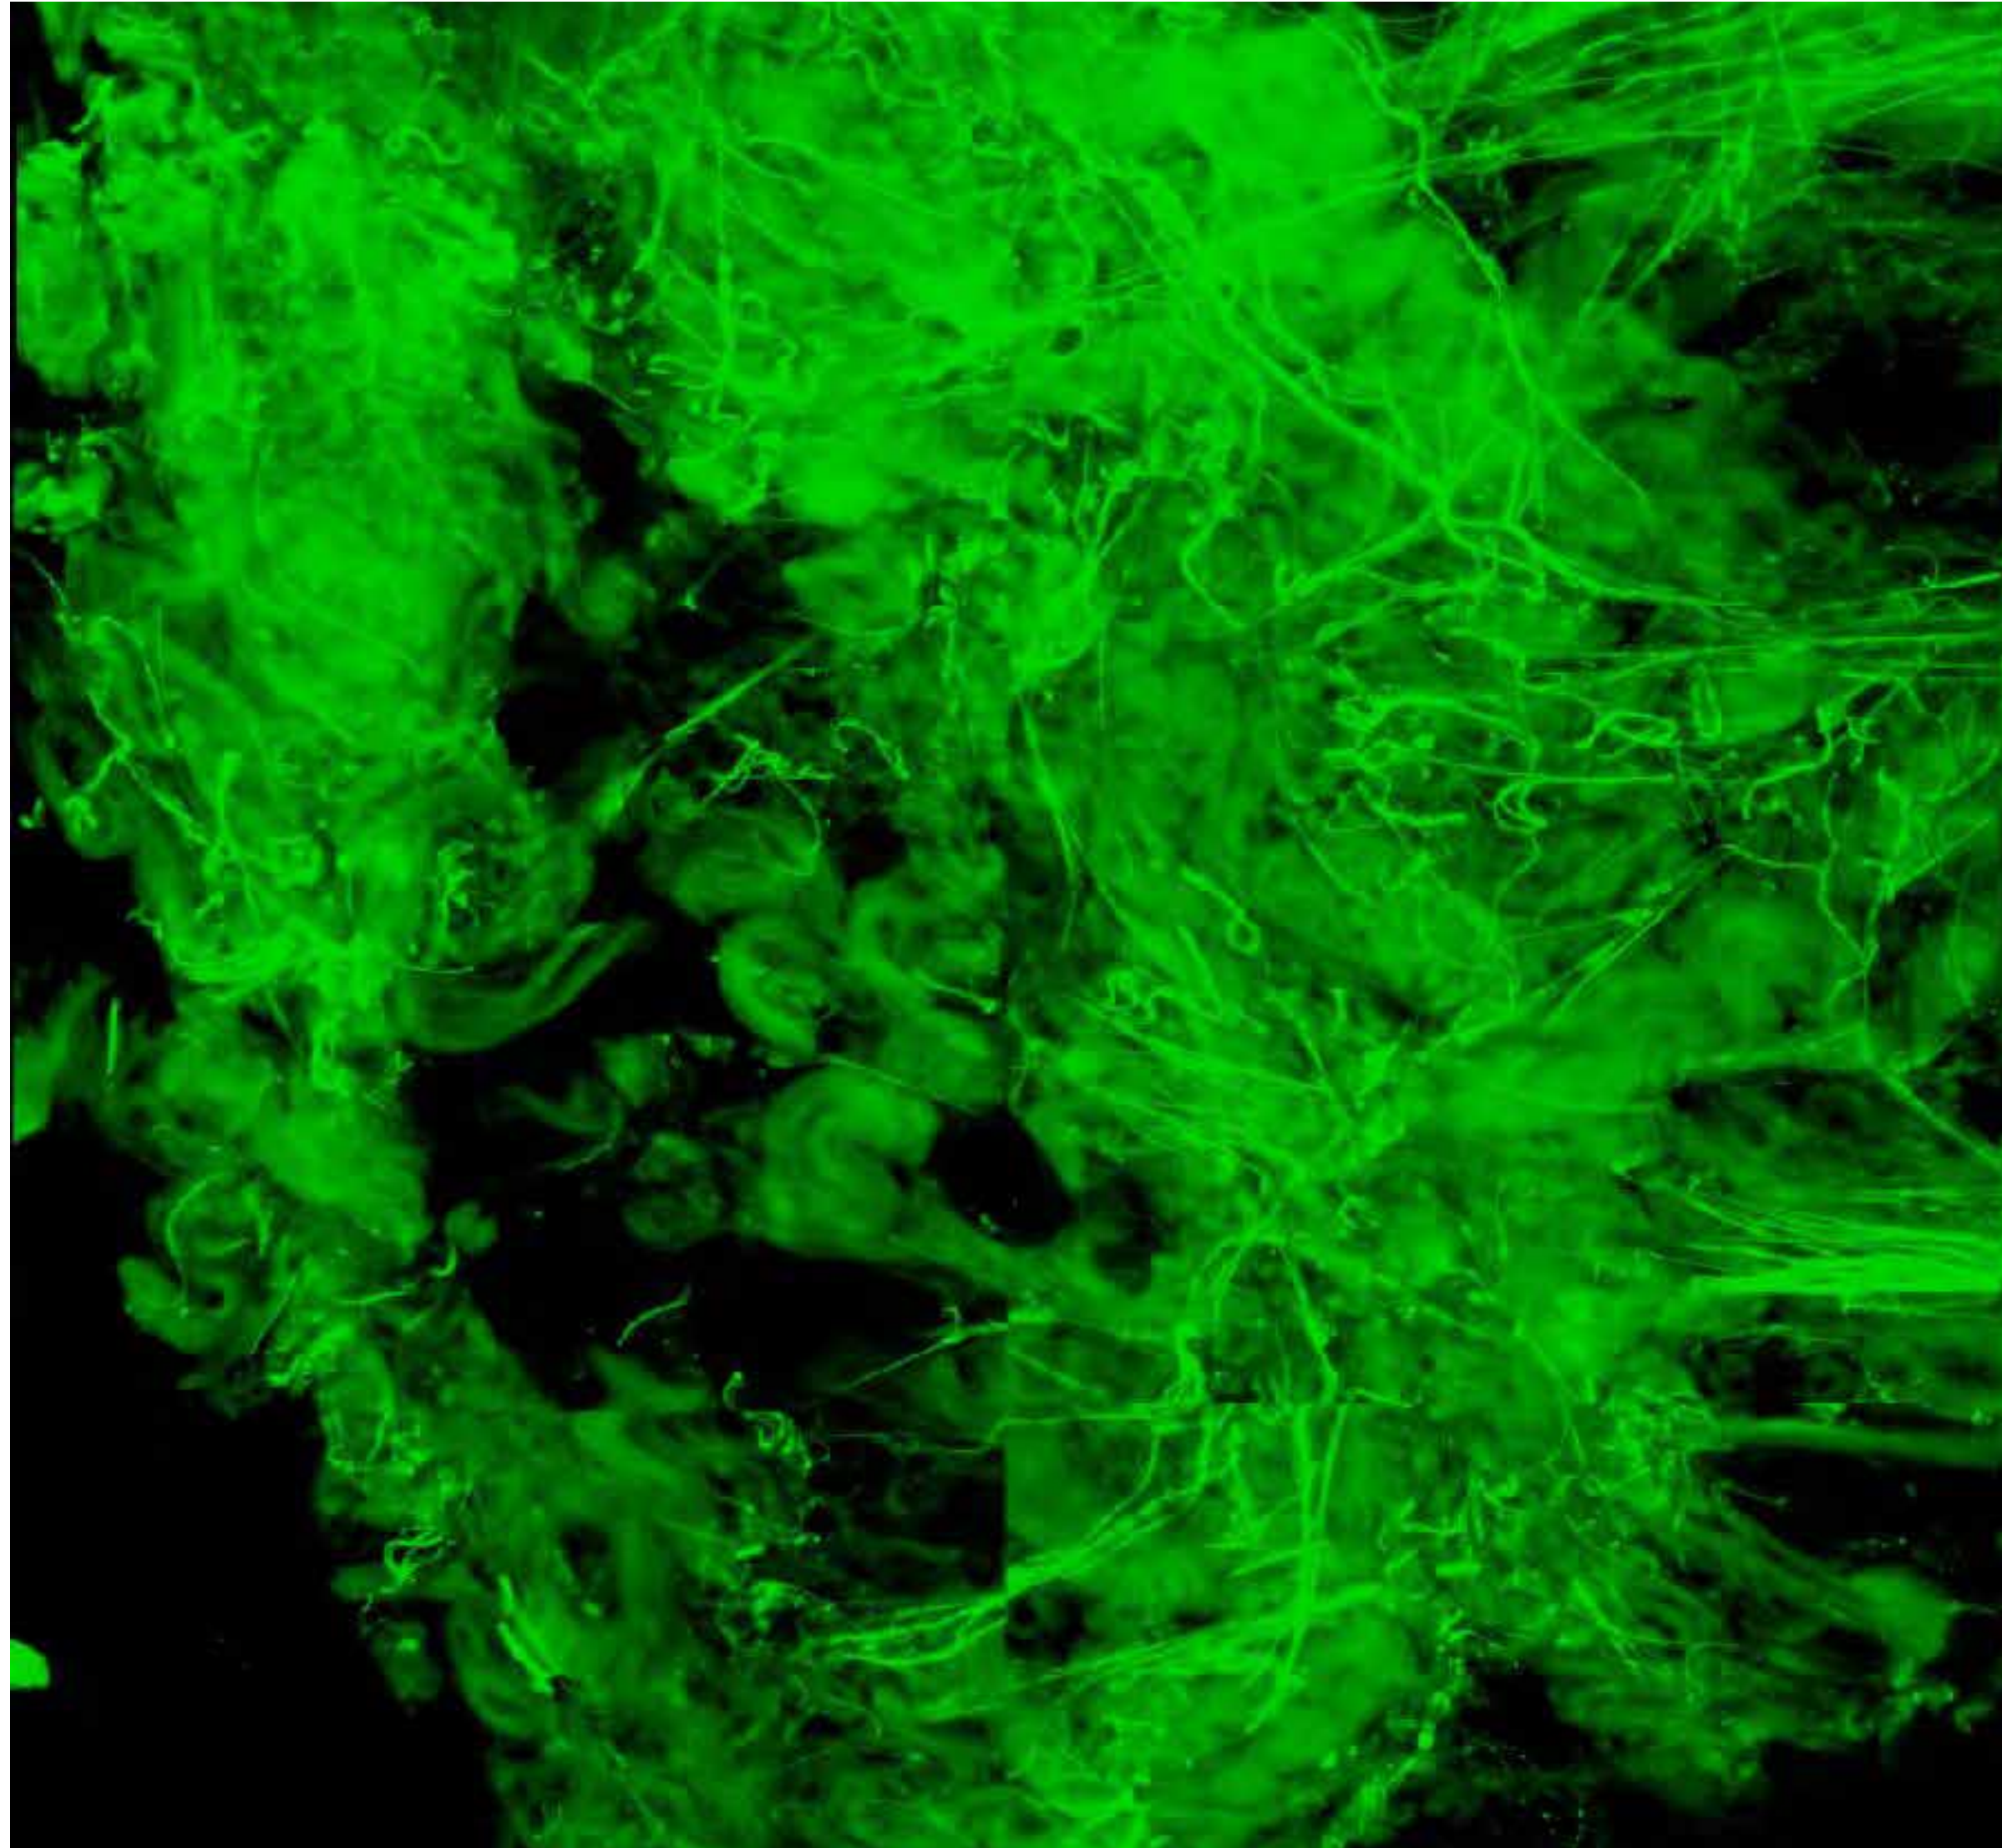

PARPi-FL only (green)

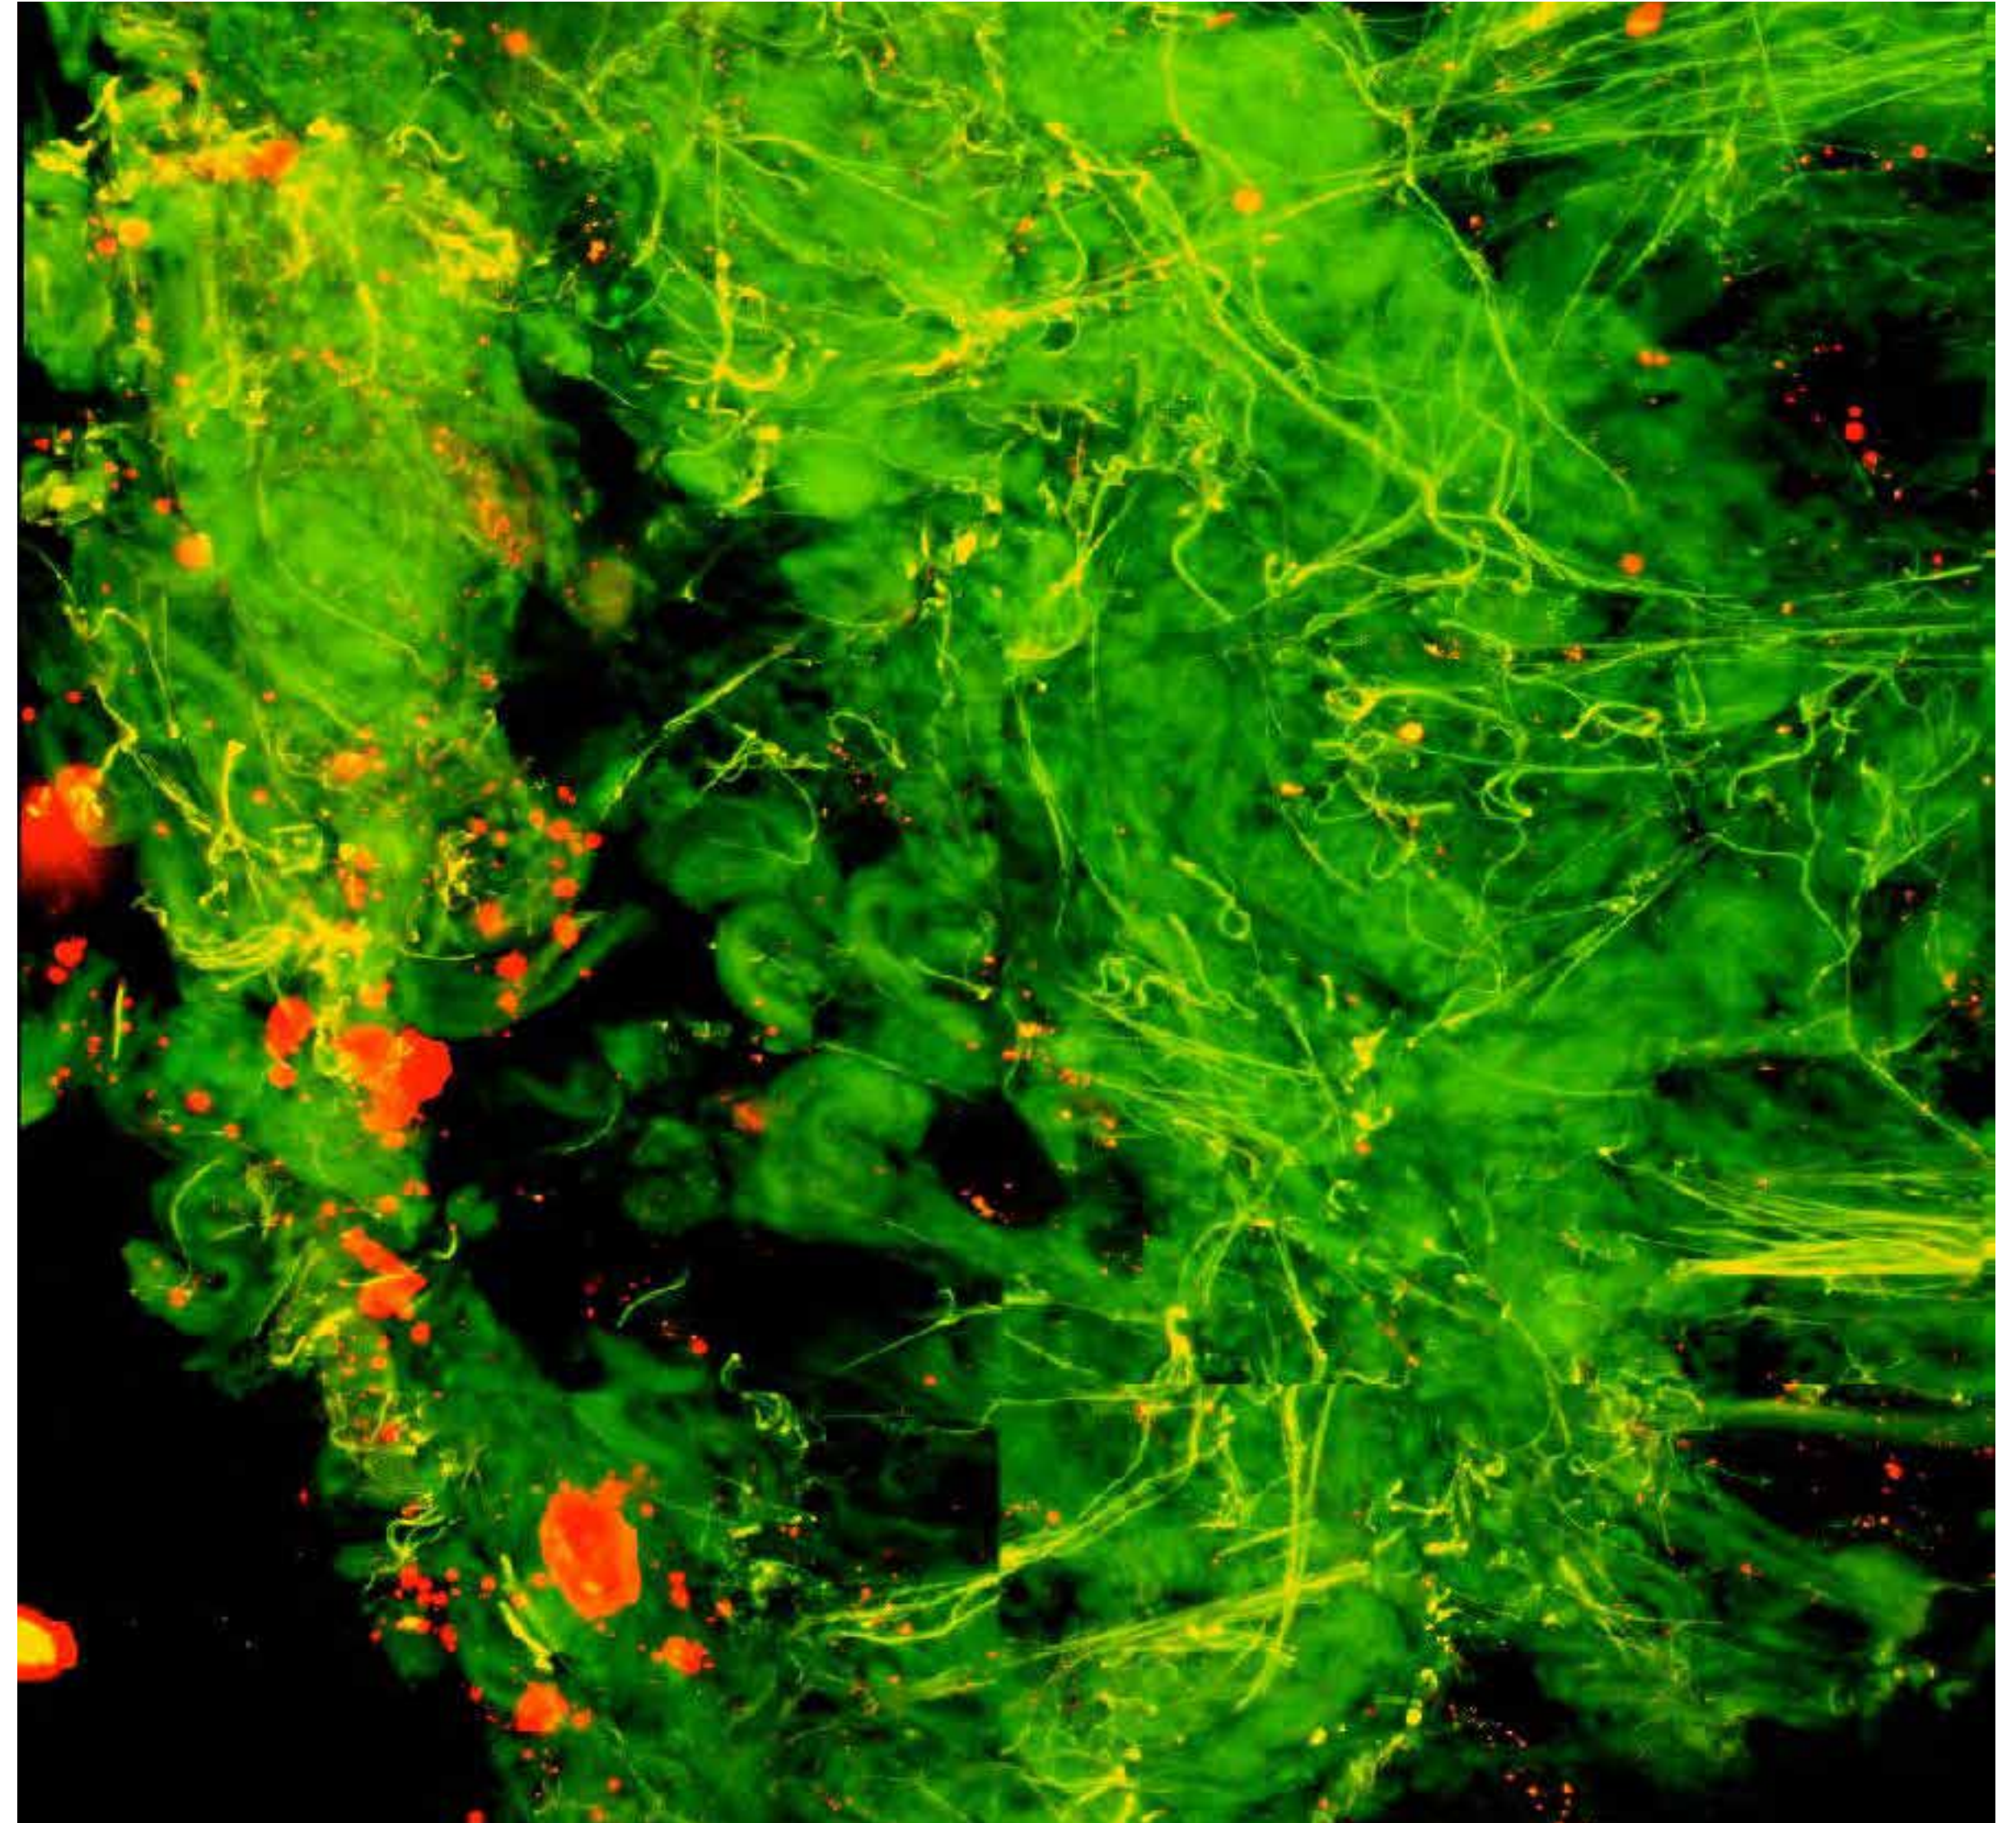

PARPi-FL (green) + Autofluorescence (red/yellow)



3296

Close-up

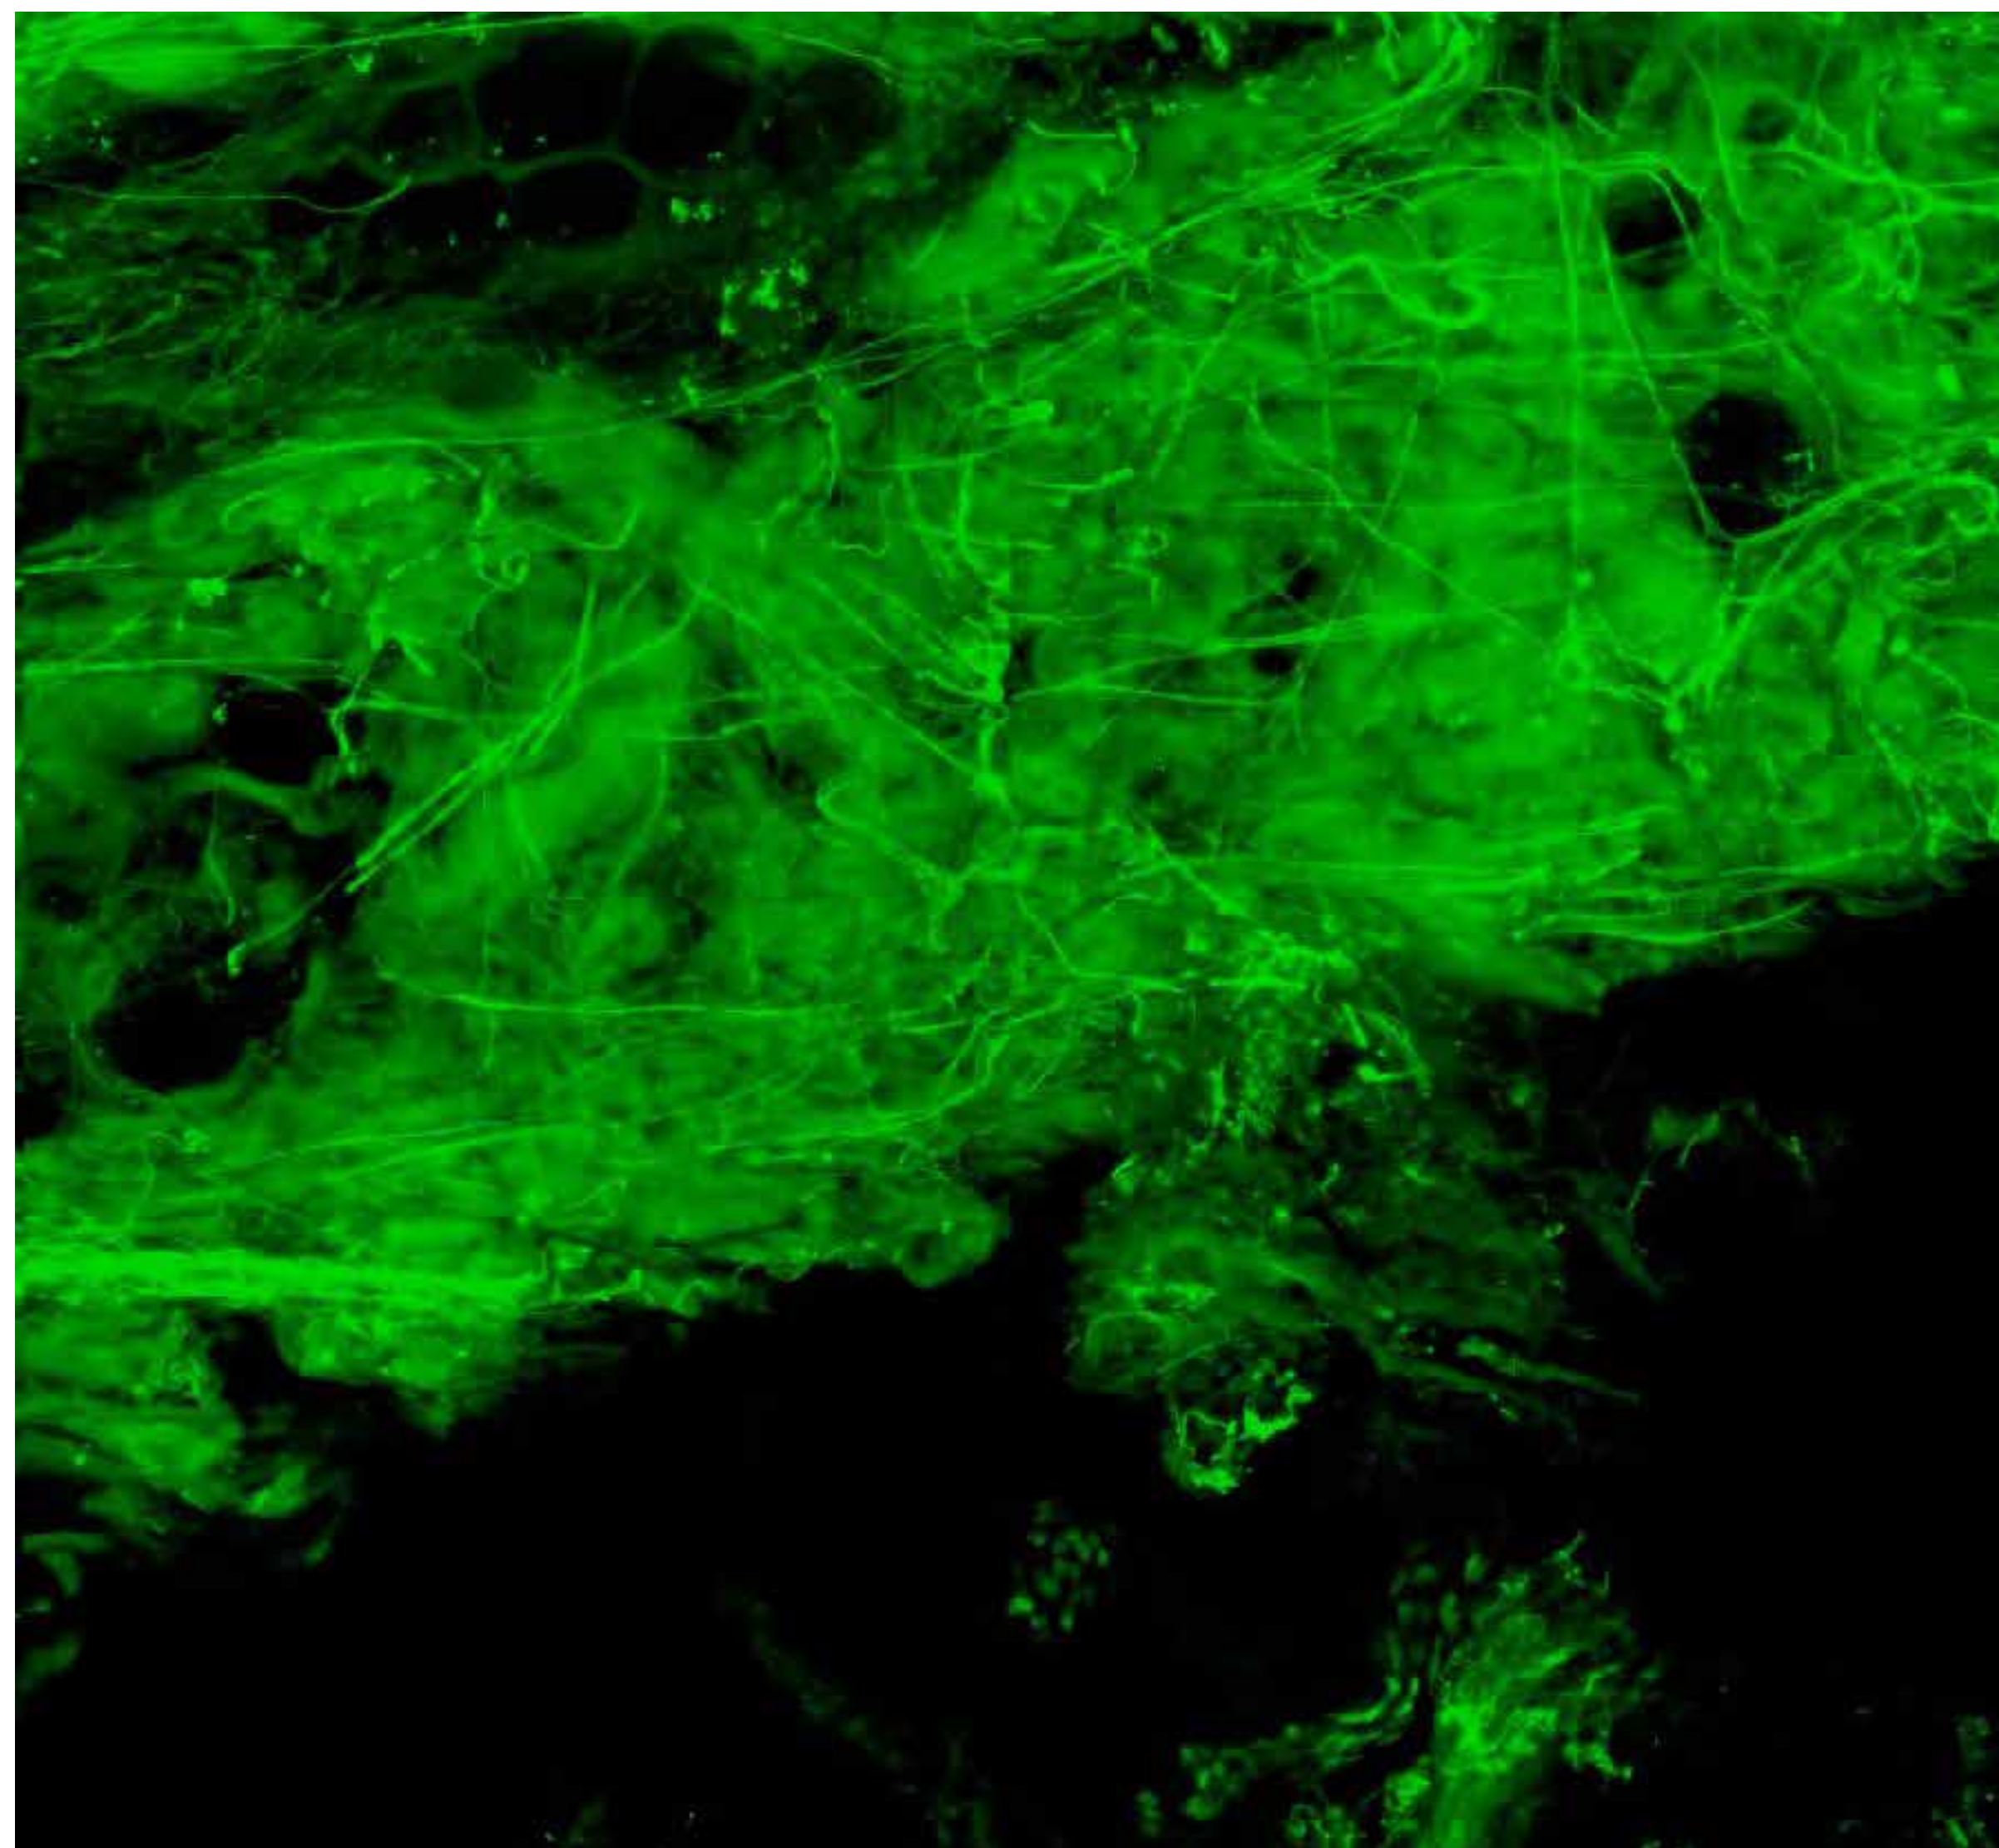

PARPi-FL only (green)

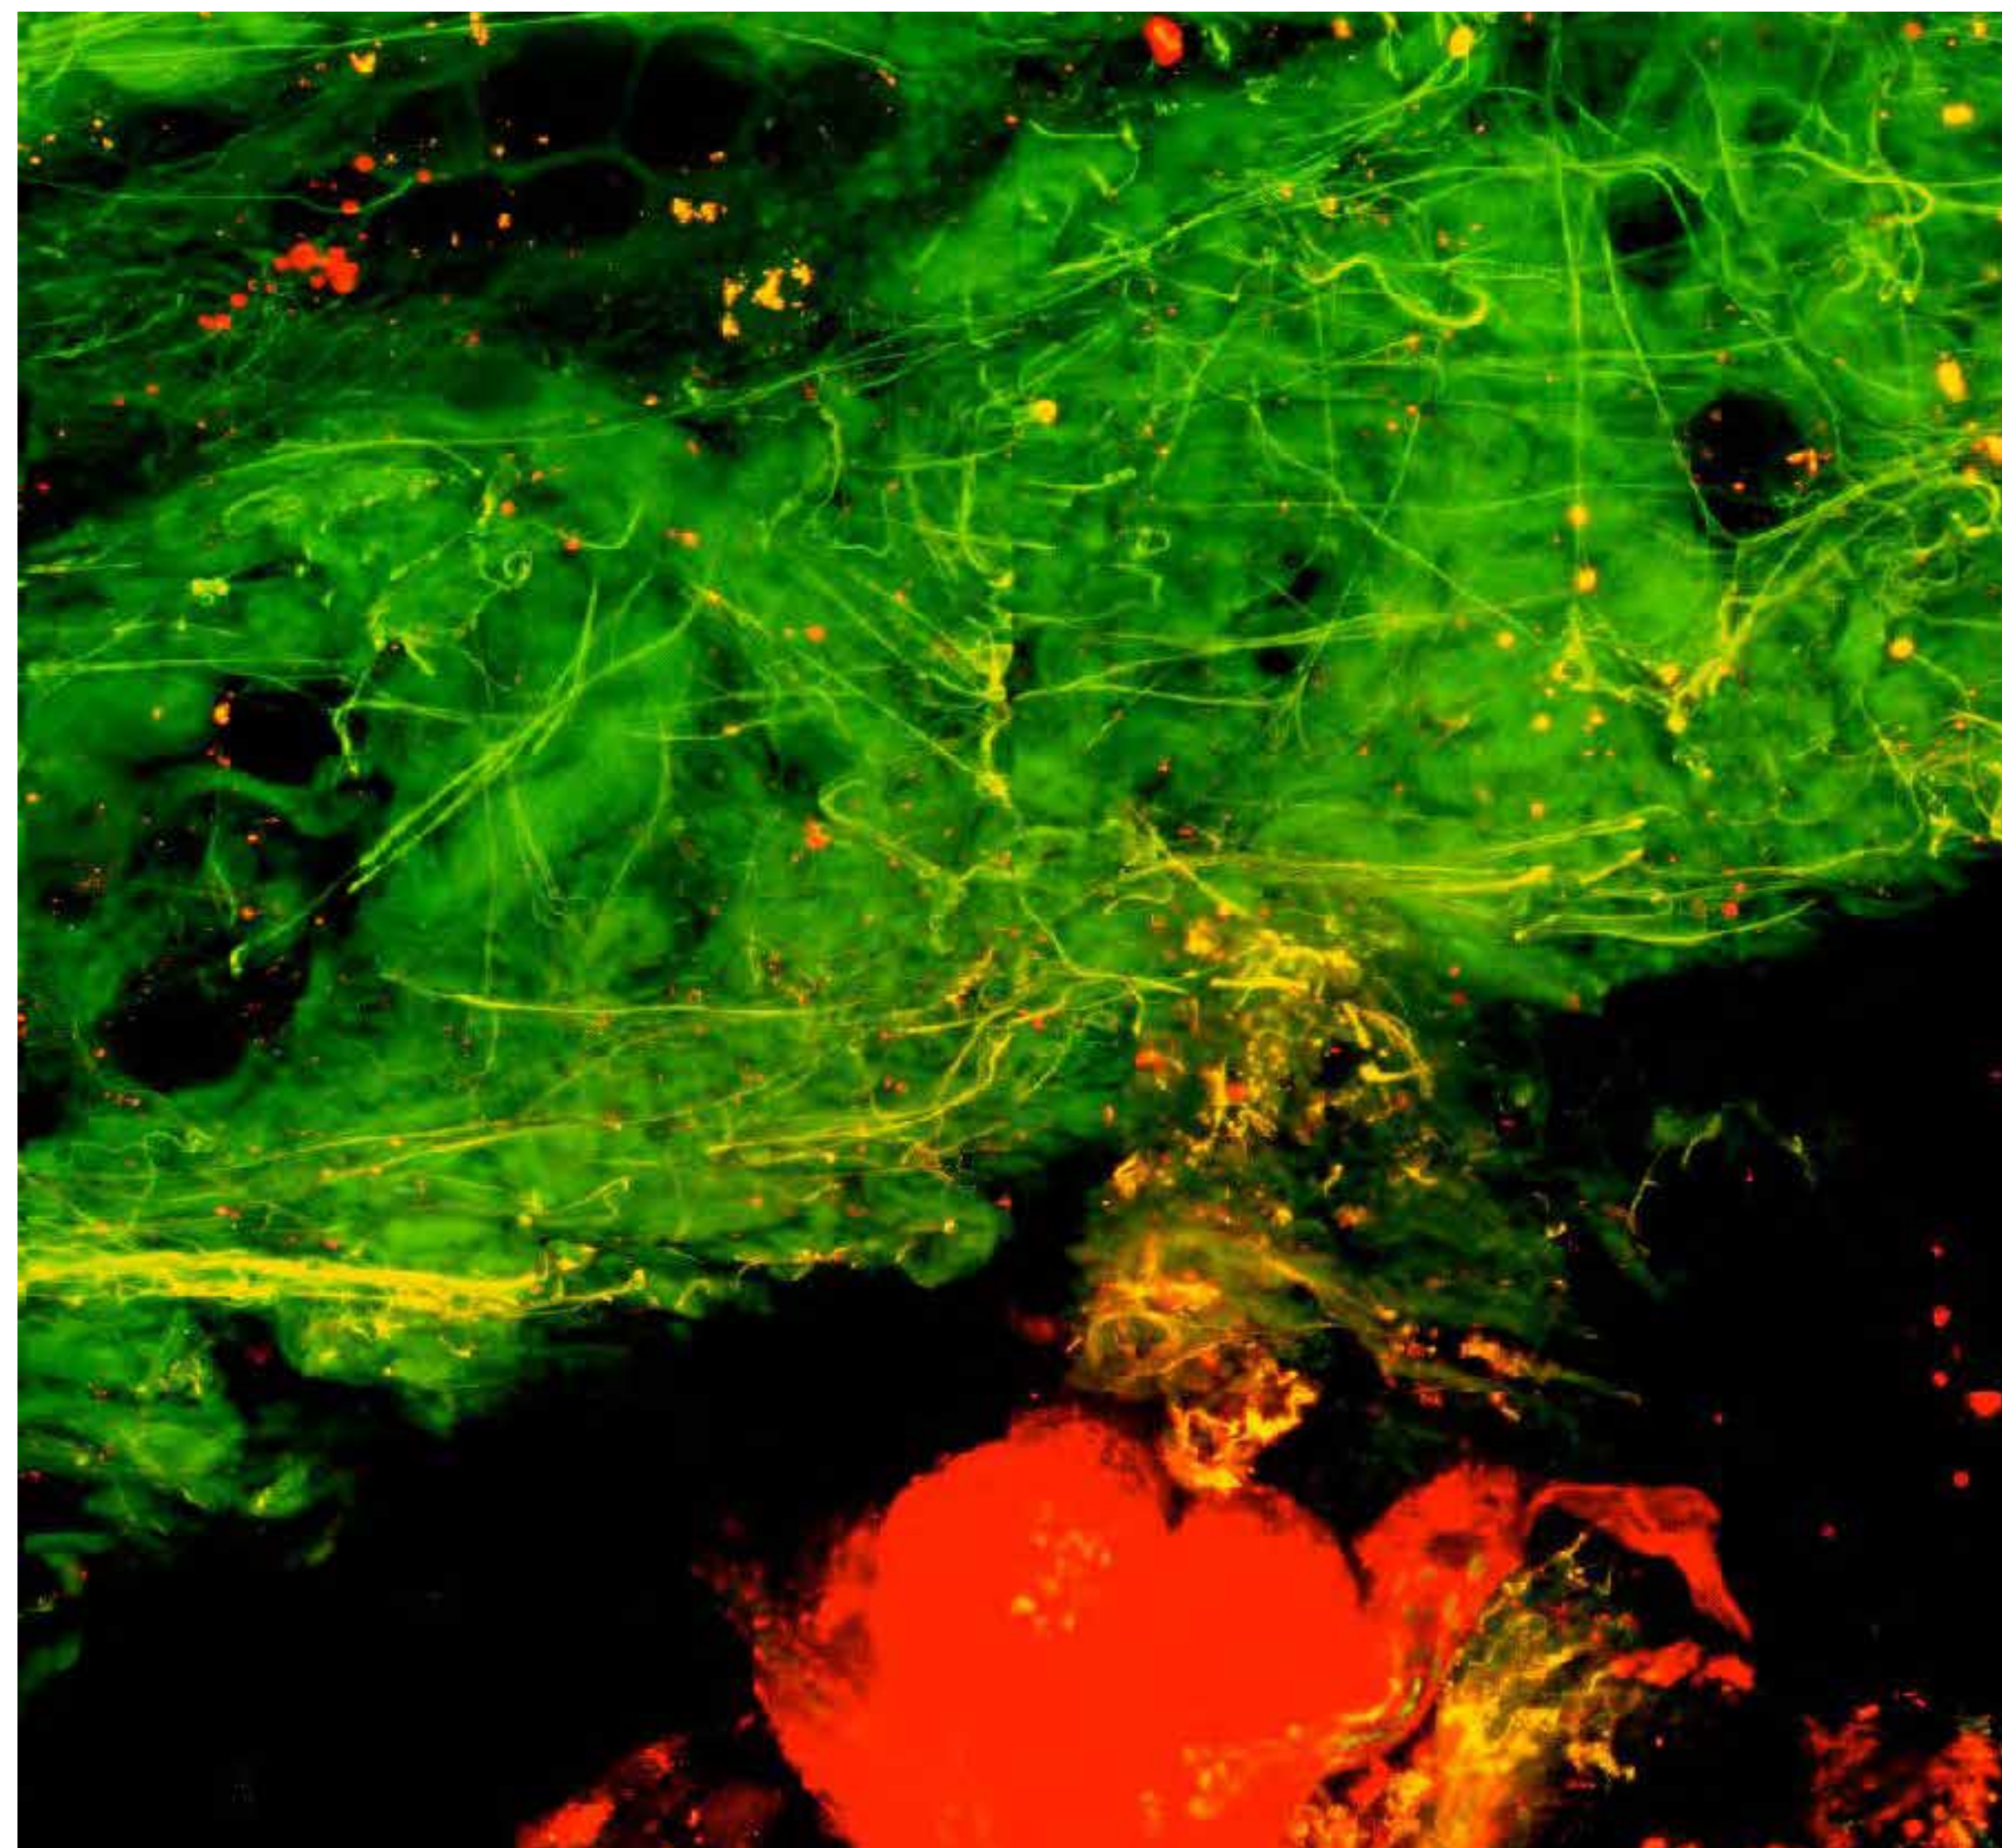

PARPi-FL (green) + Autofluorescence (red/yellow)



3296

10

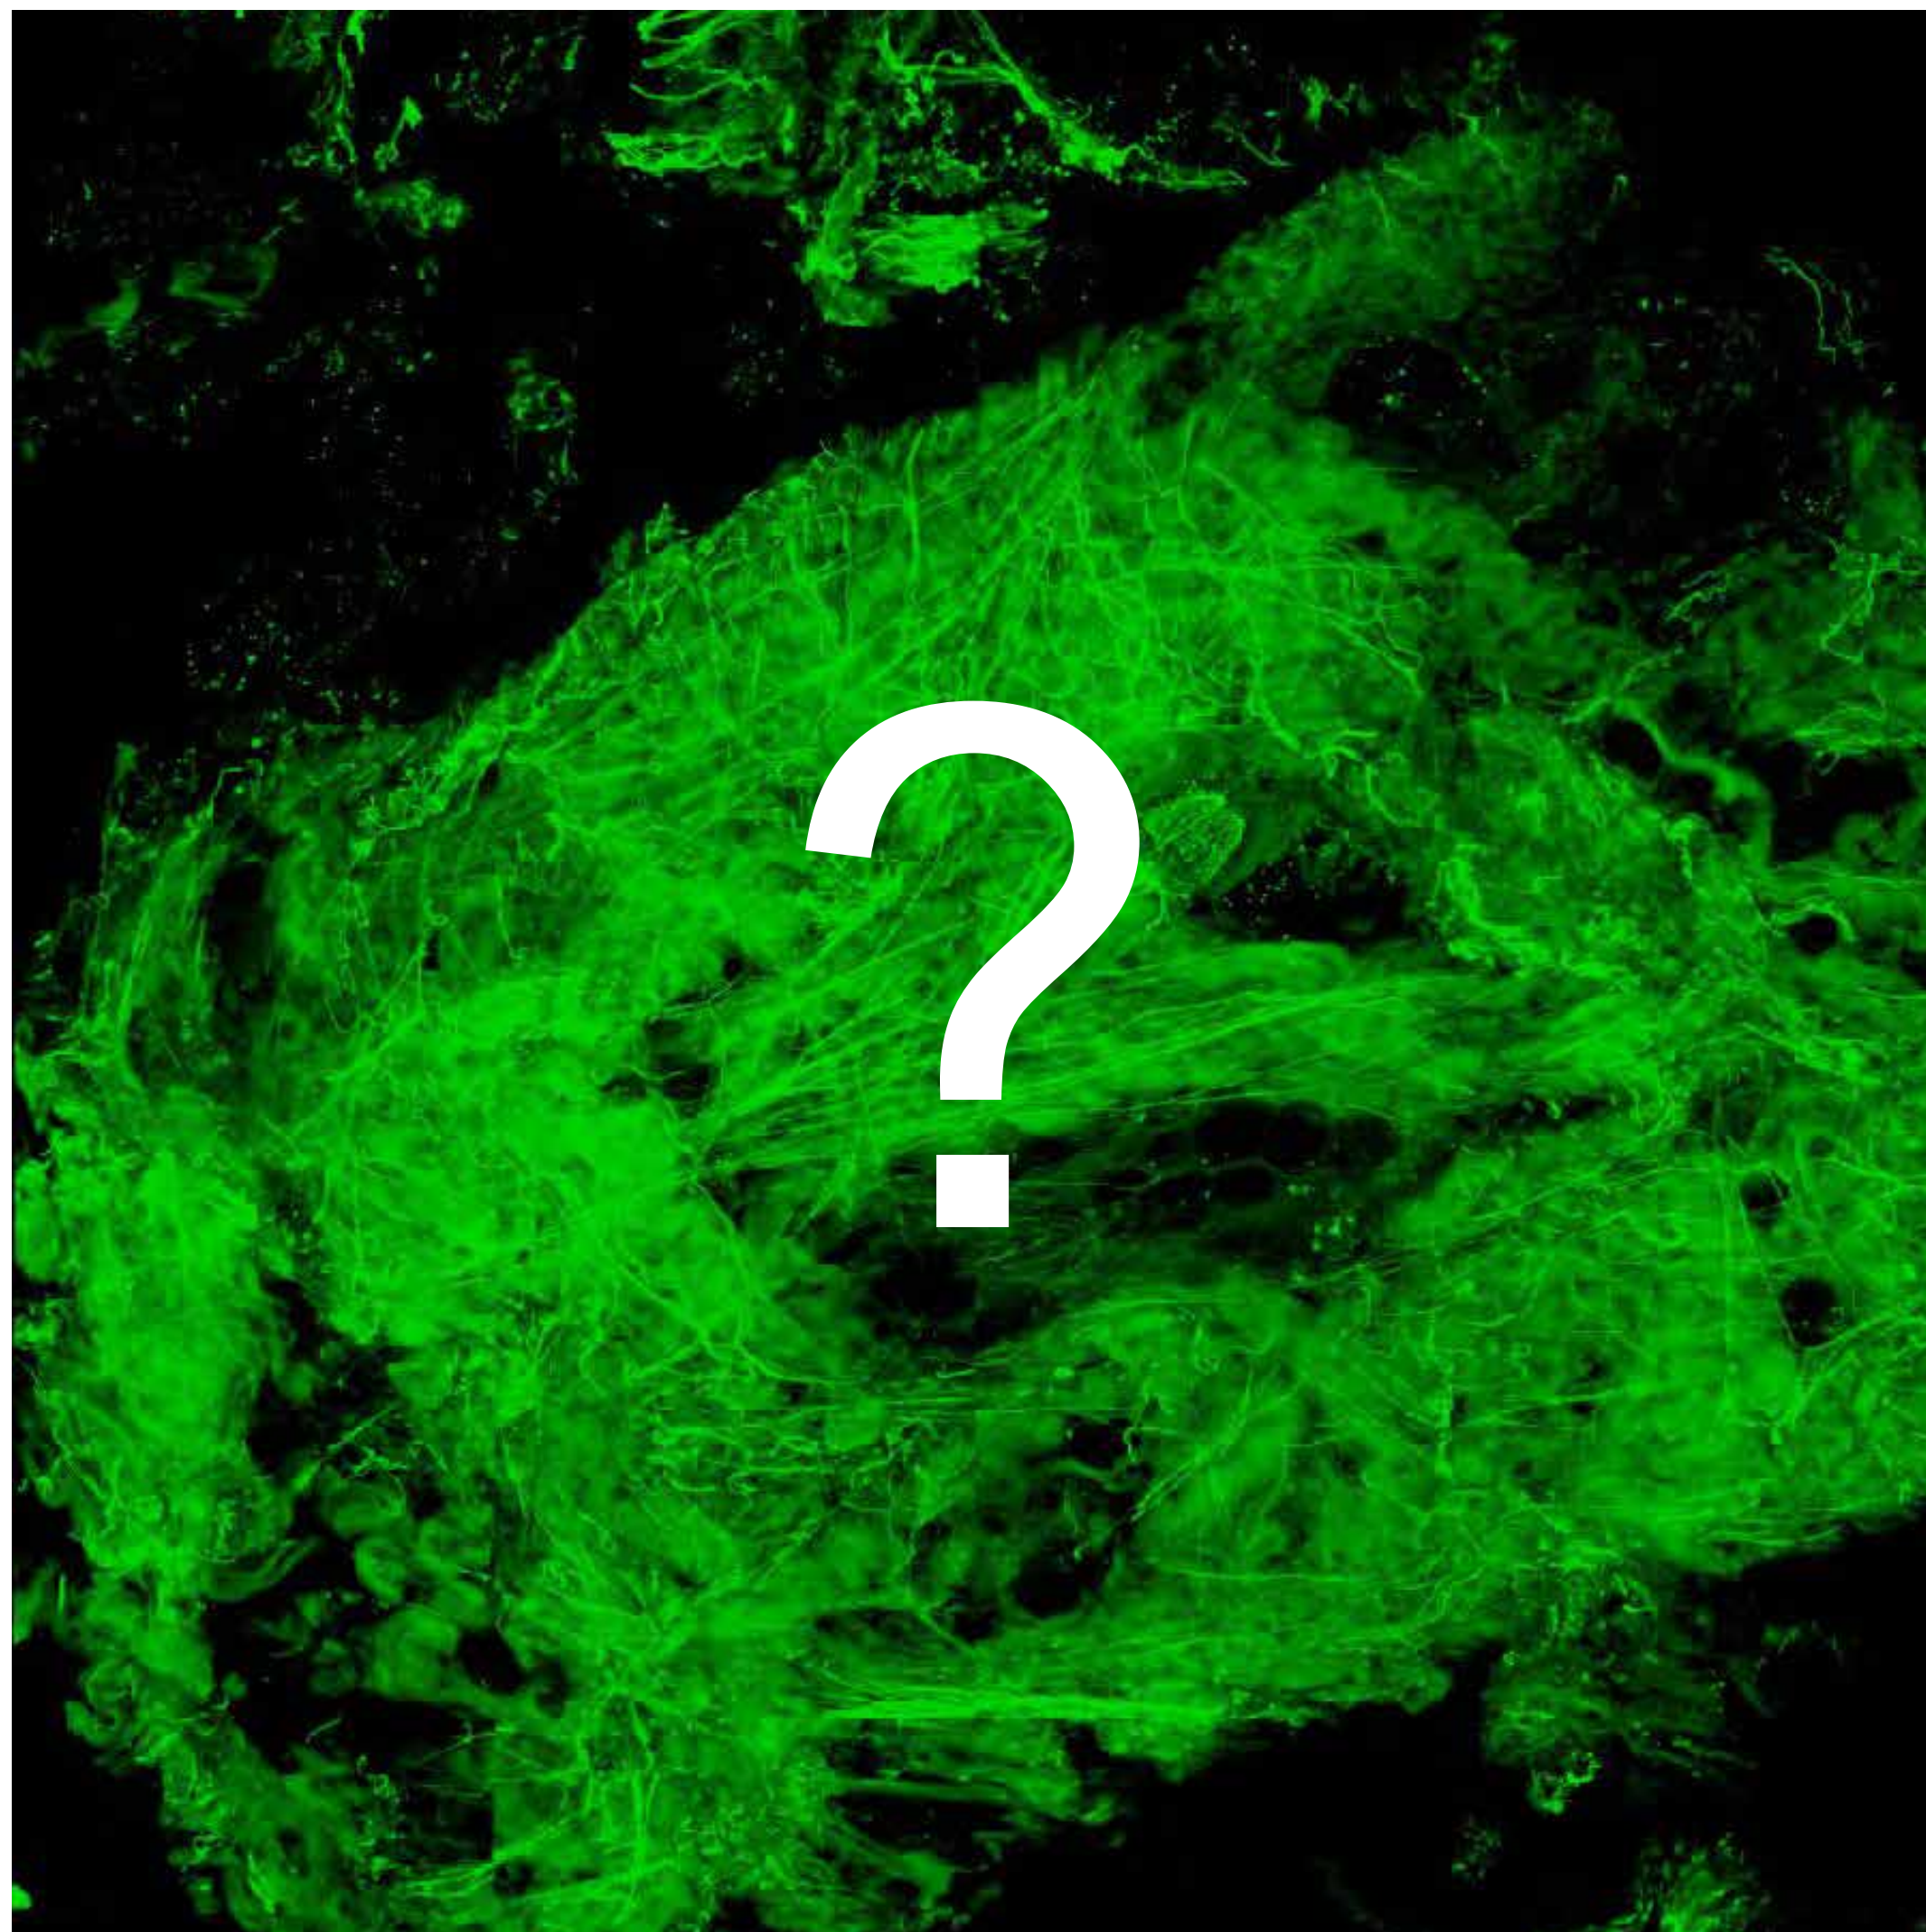

Tumor

Margin



3403

# Overview

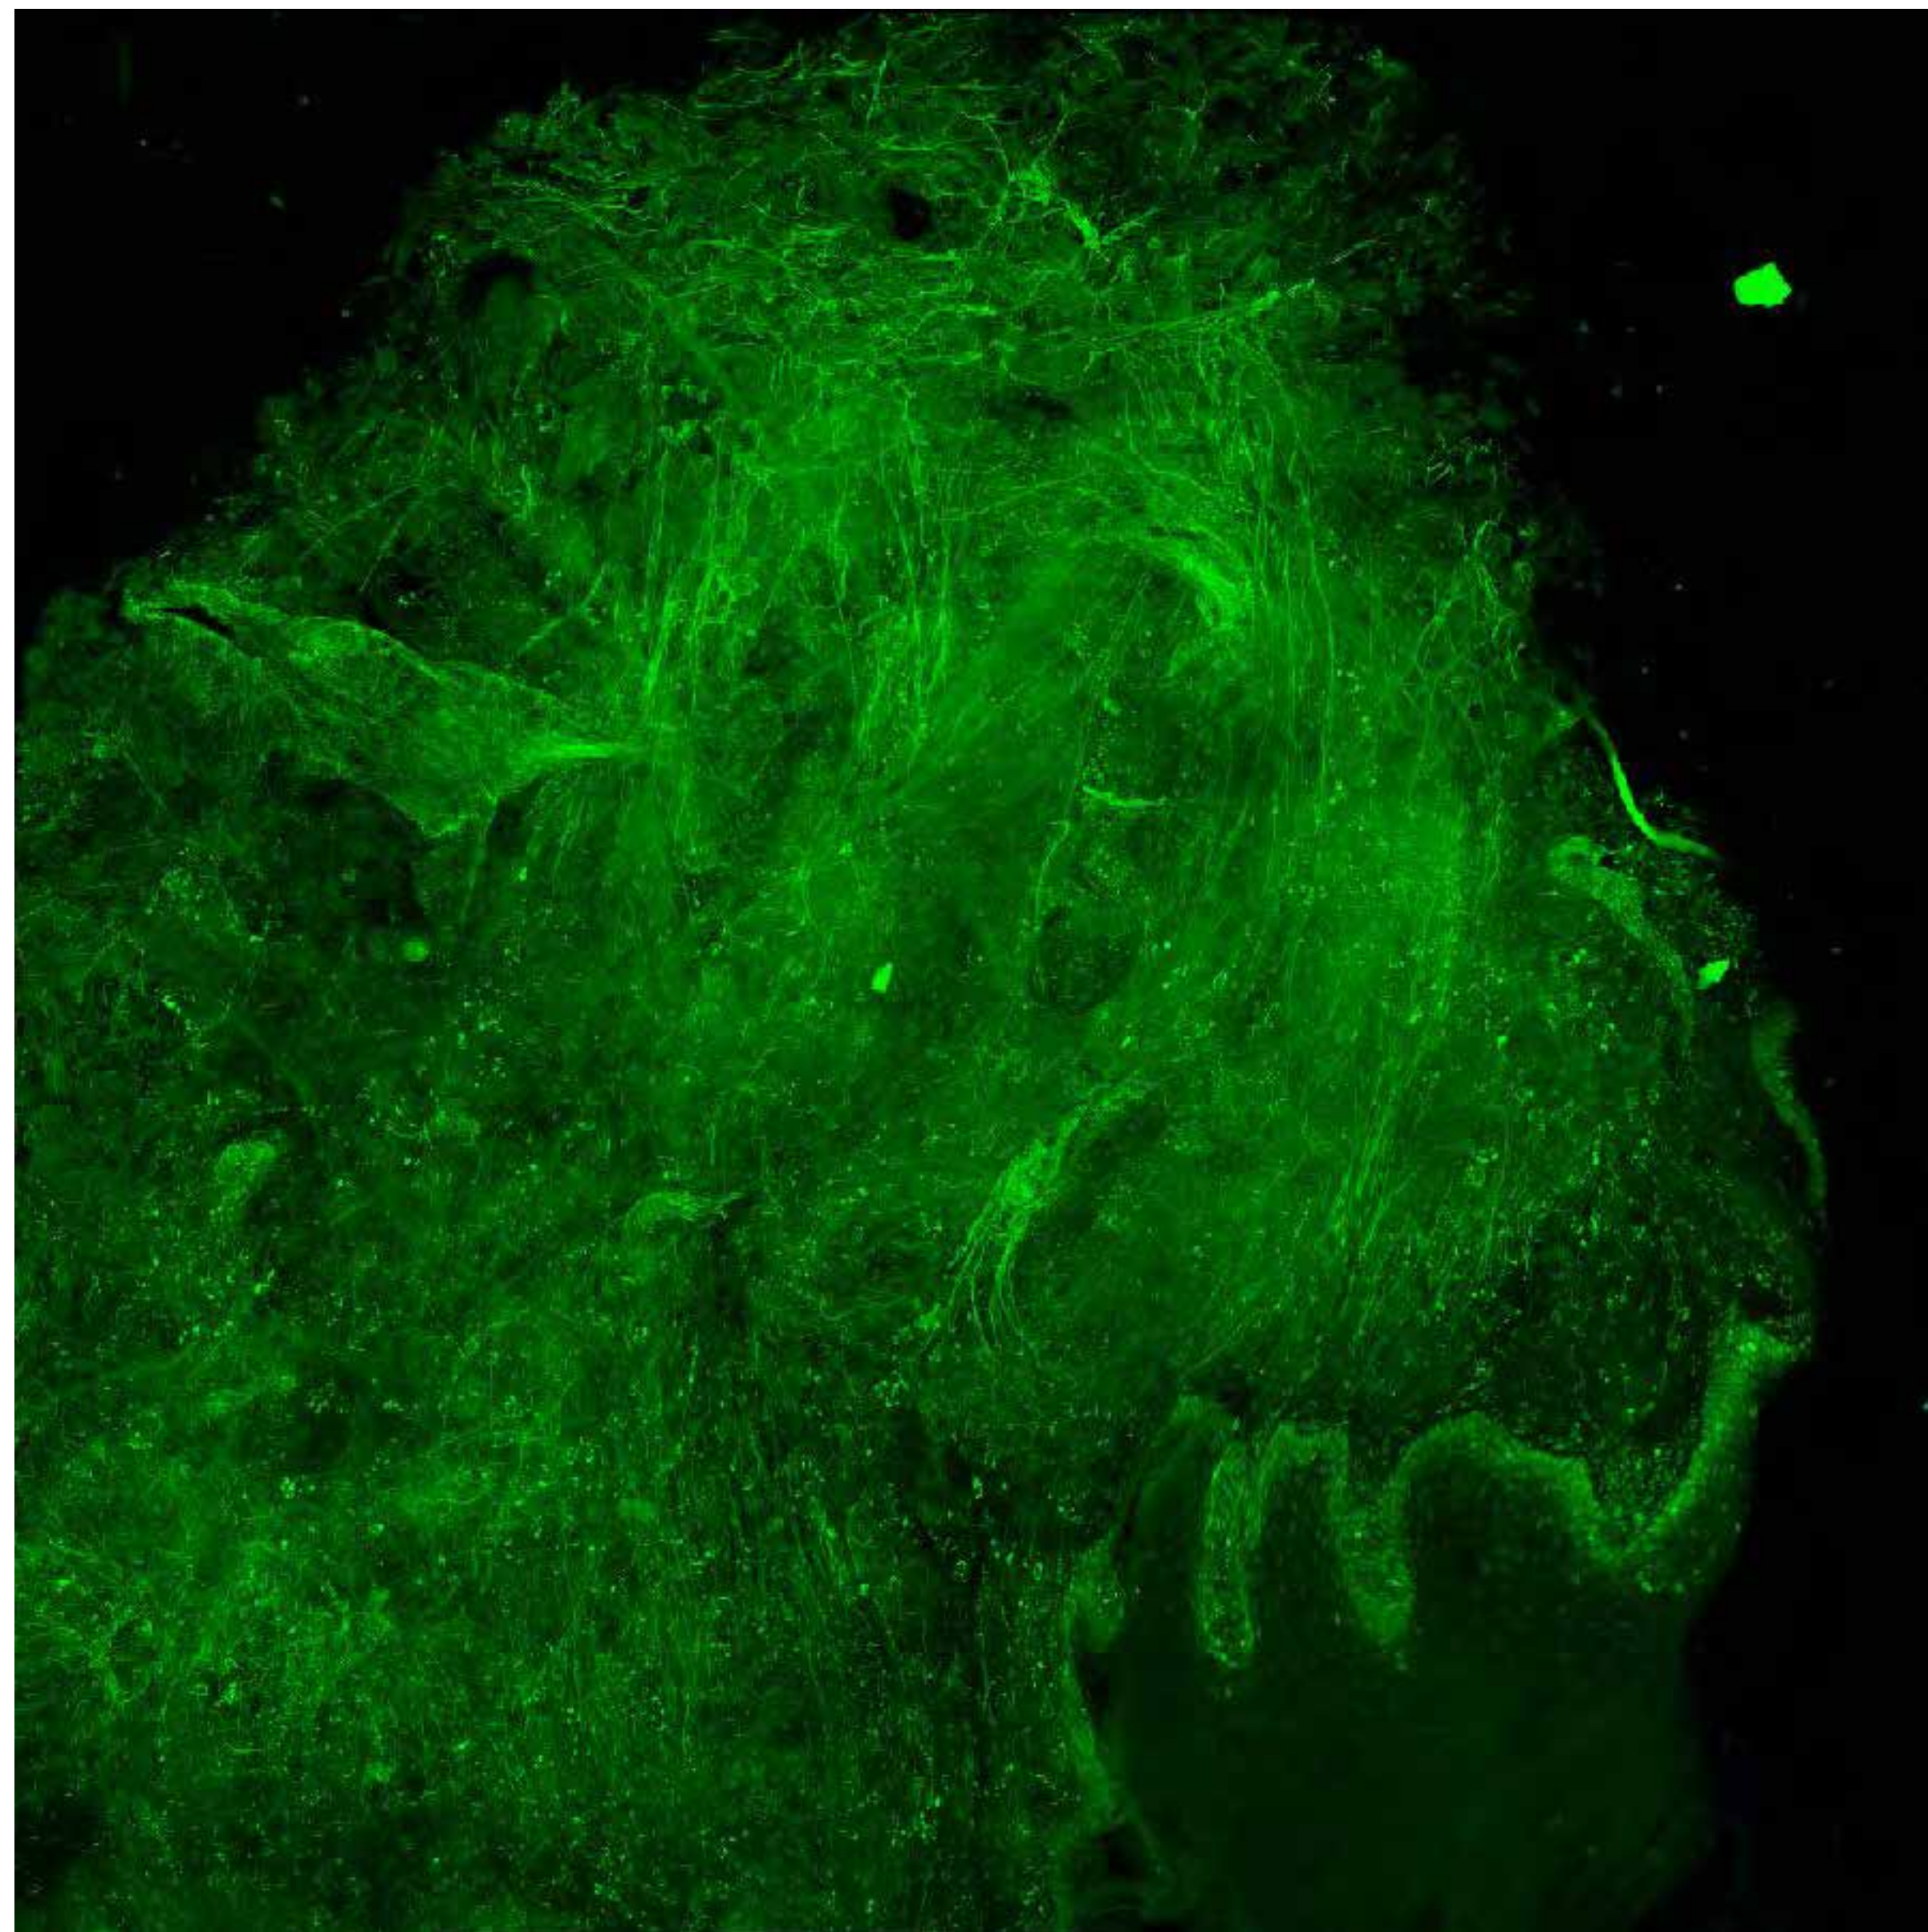

PARPi-FL only (green)

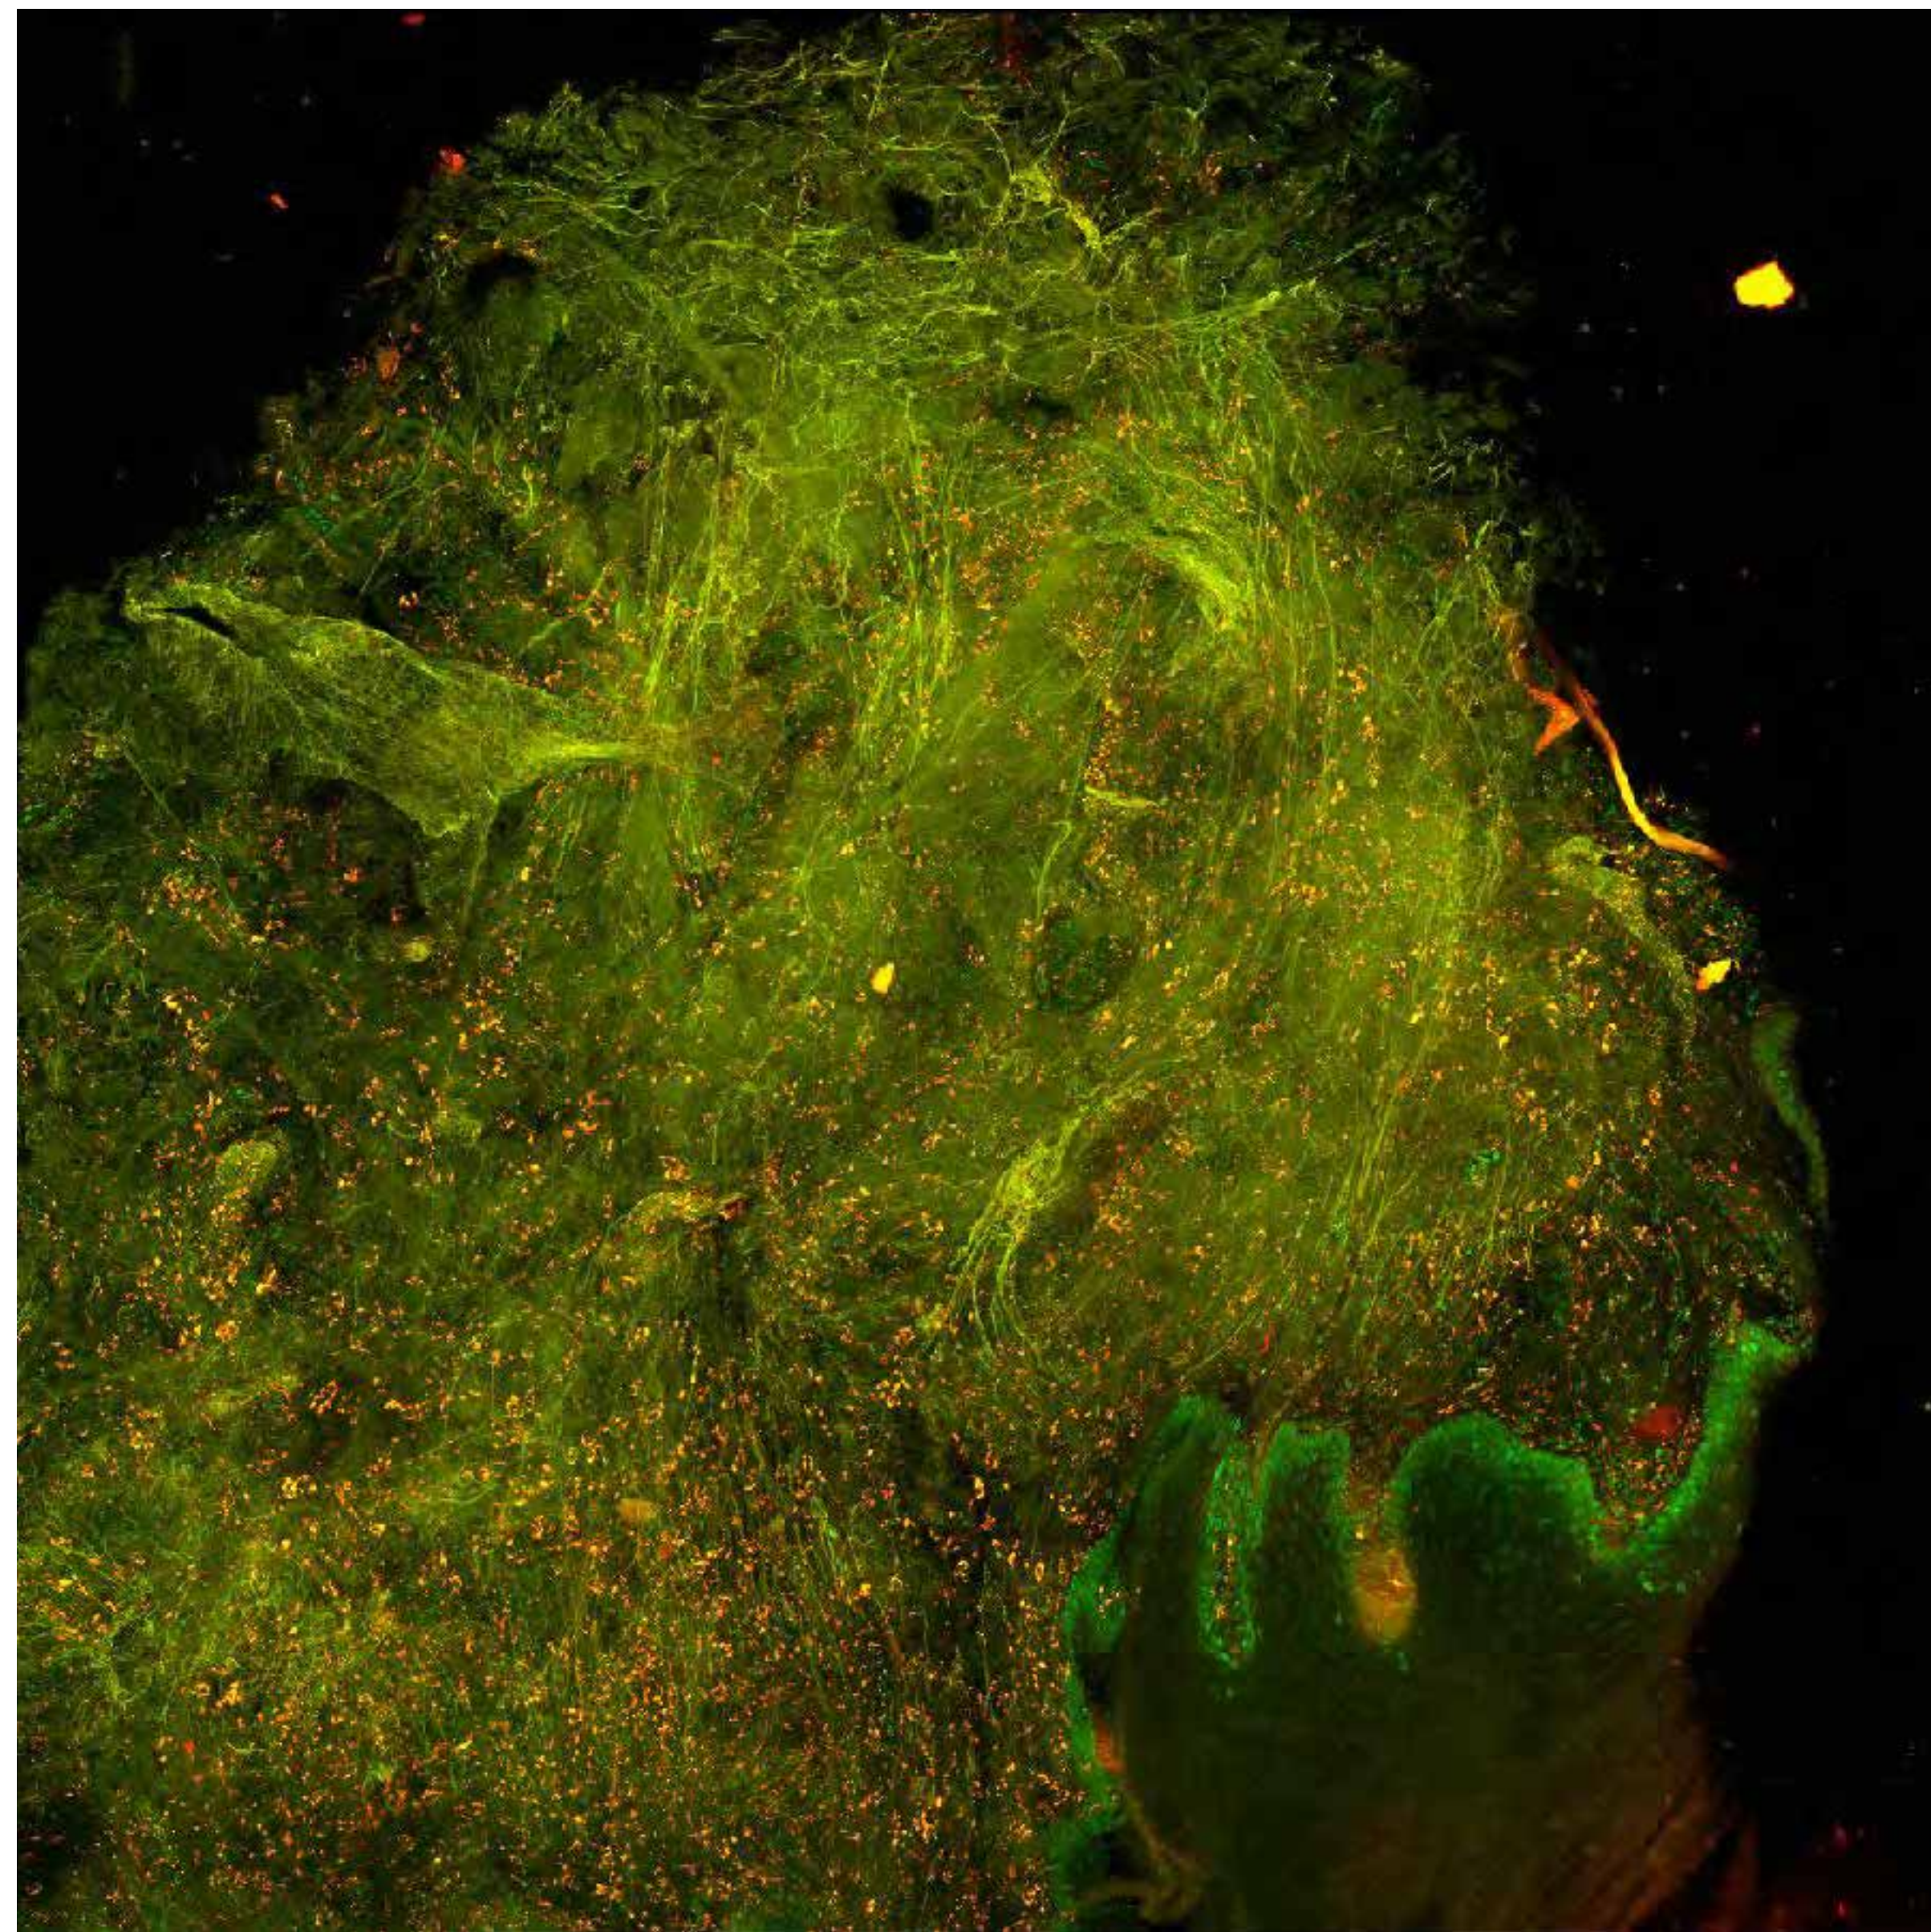

PARPi-FL (green) + Autofluorescence (red/yellow)



3403

Close-up

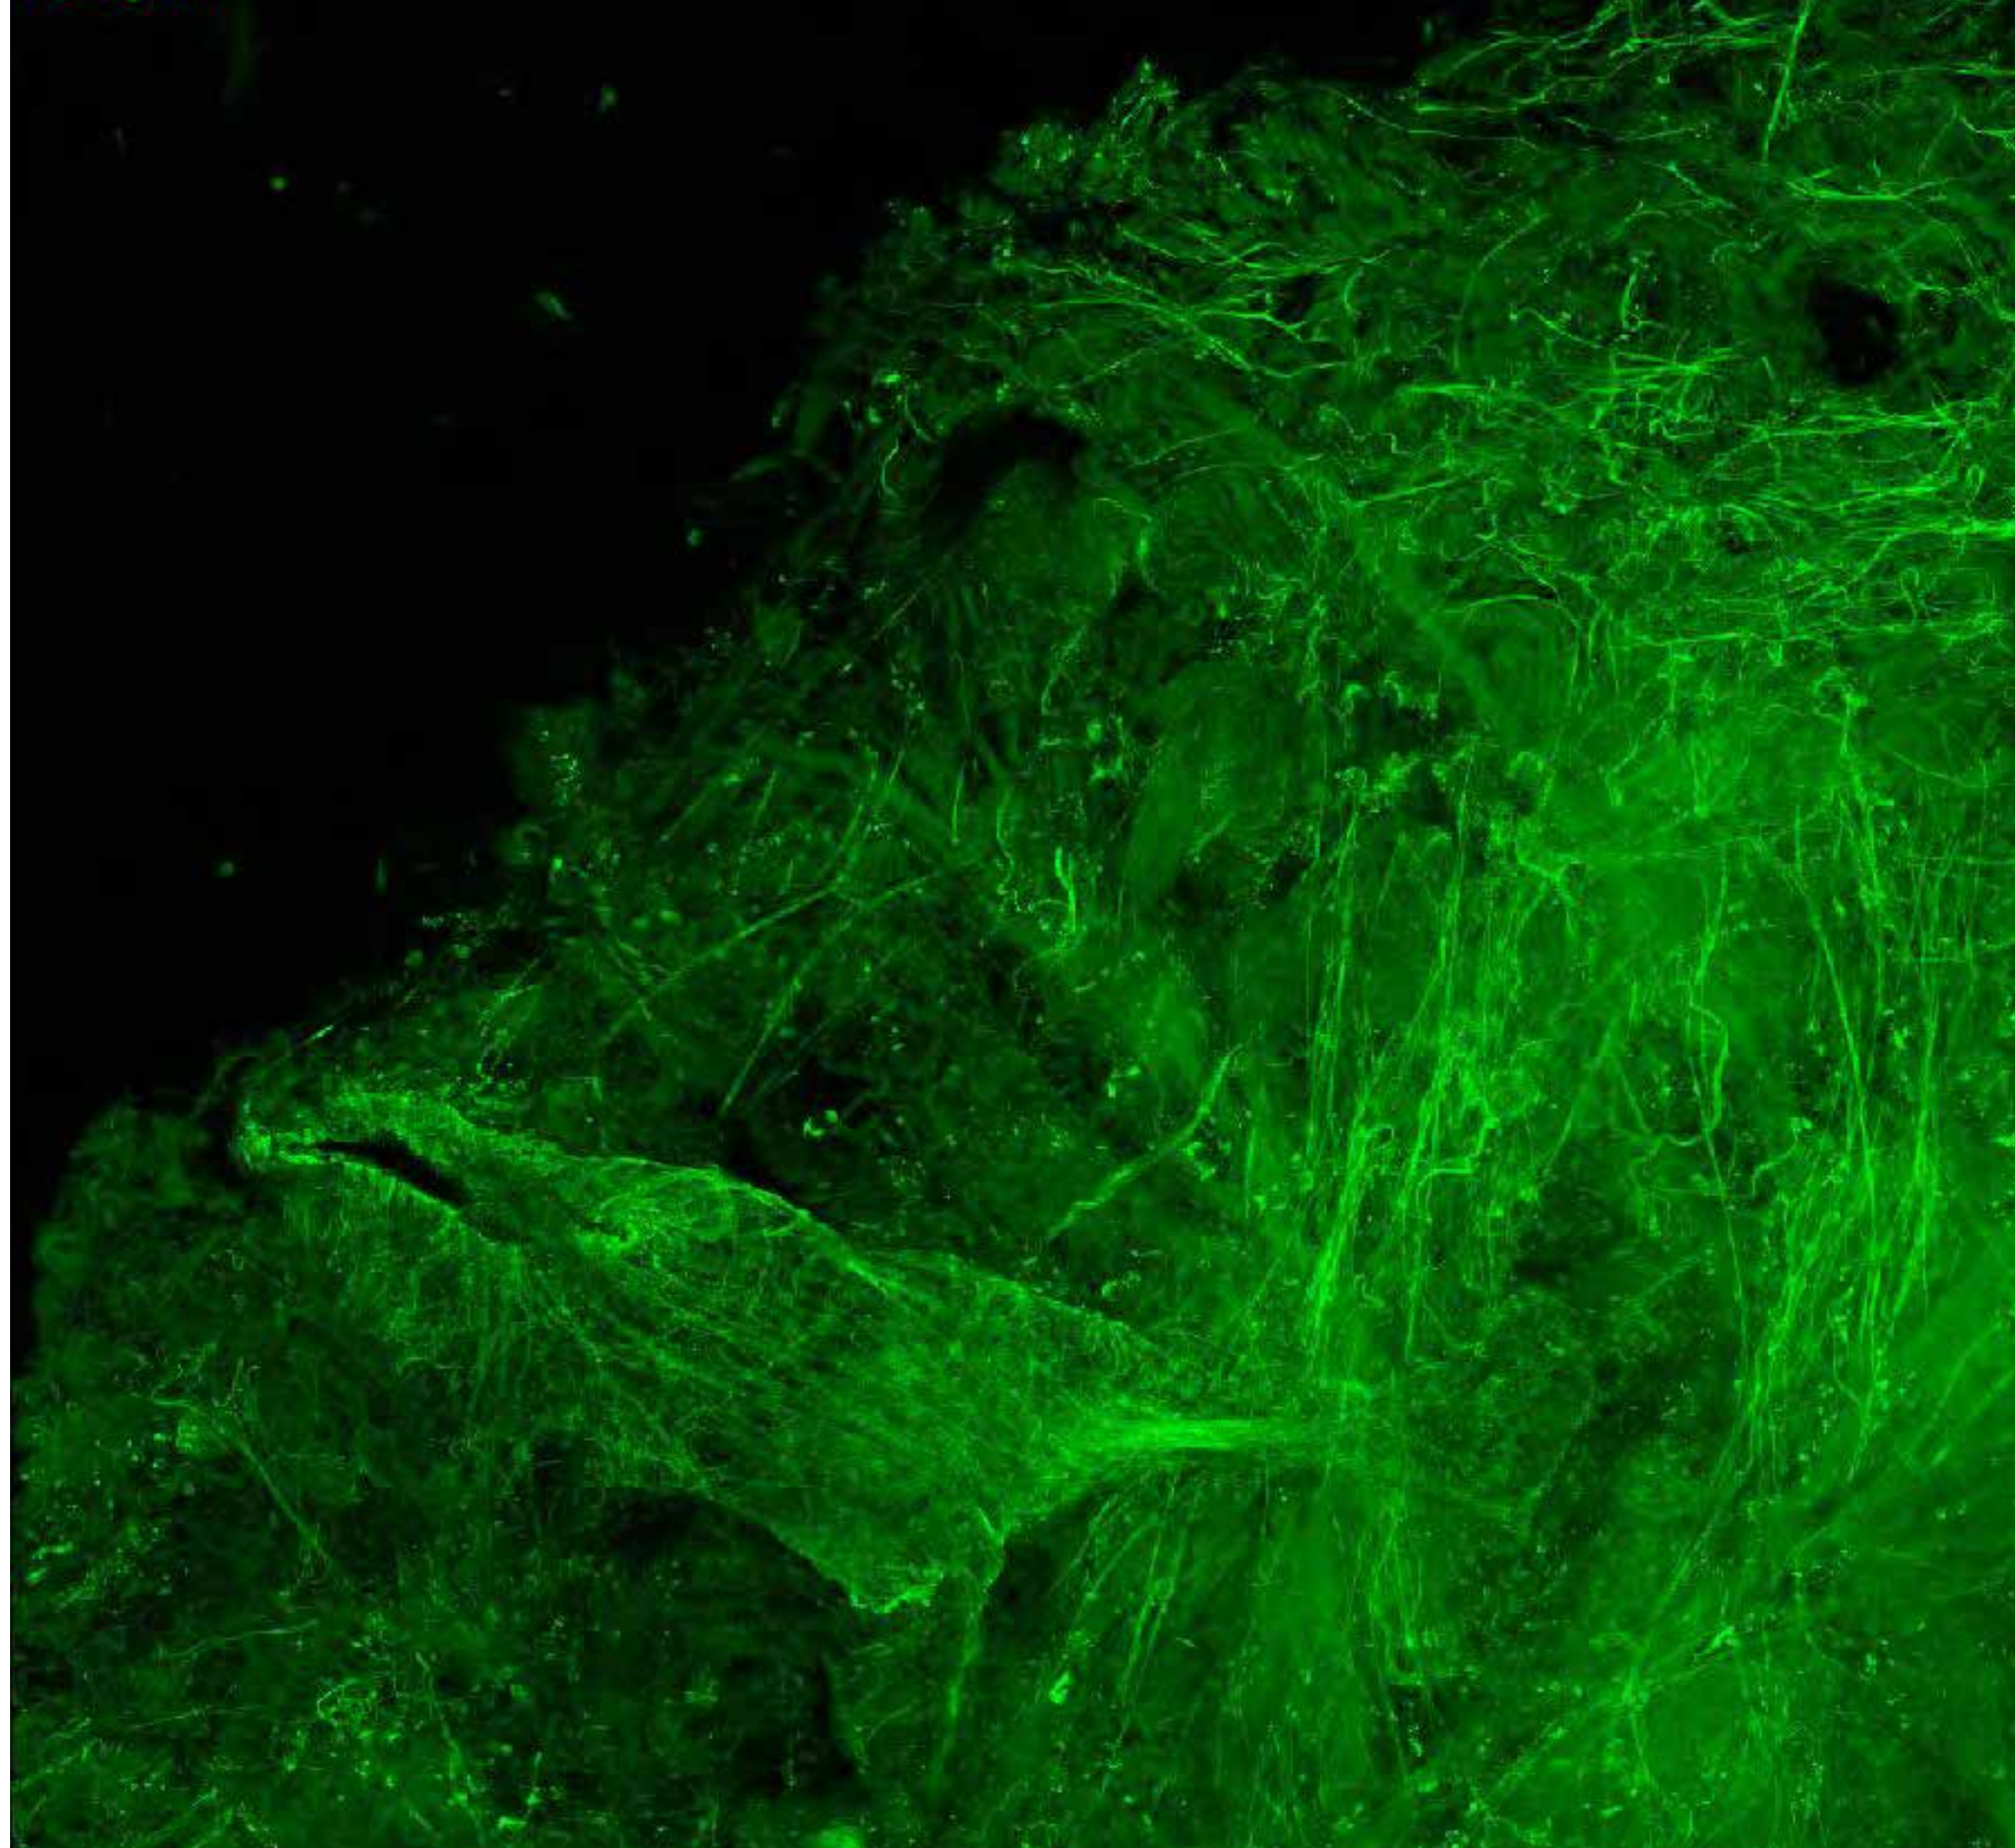

PARPi-FL only (green)

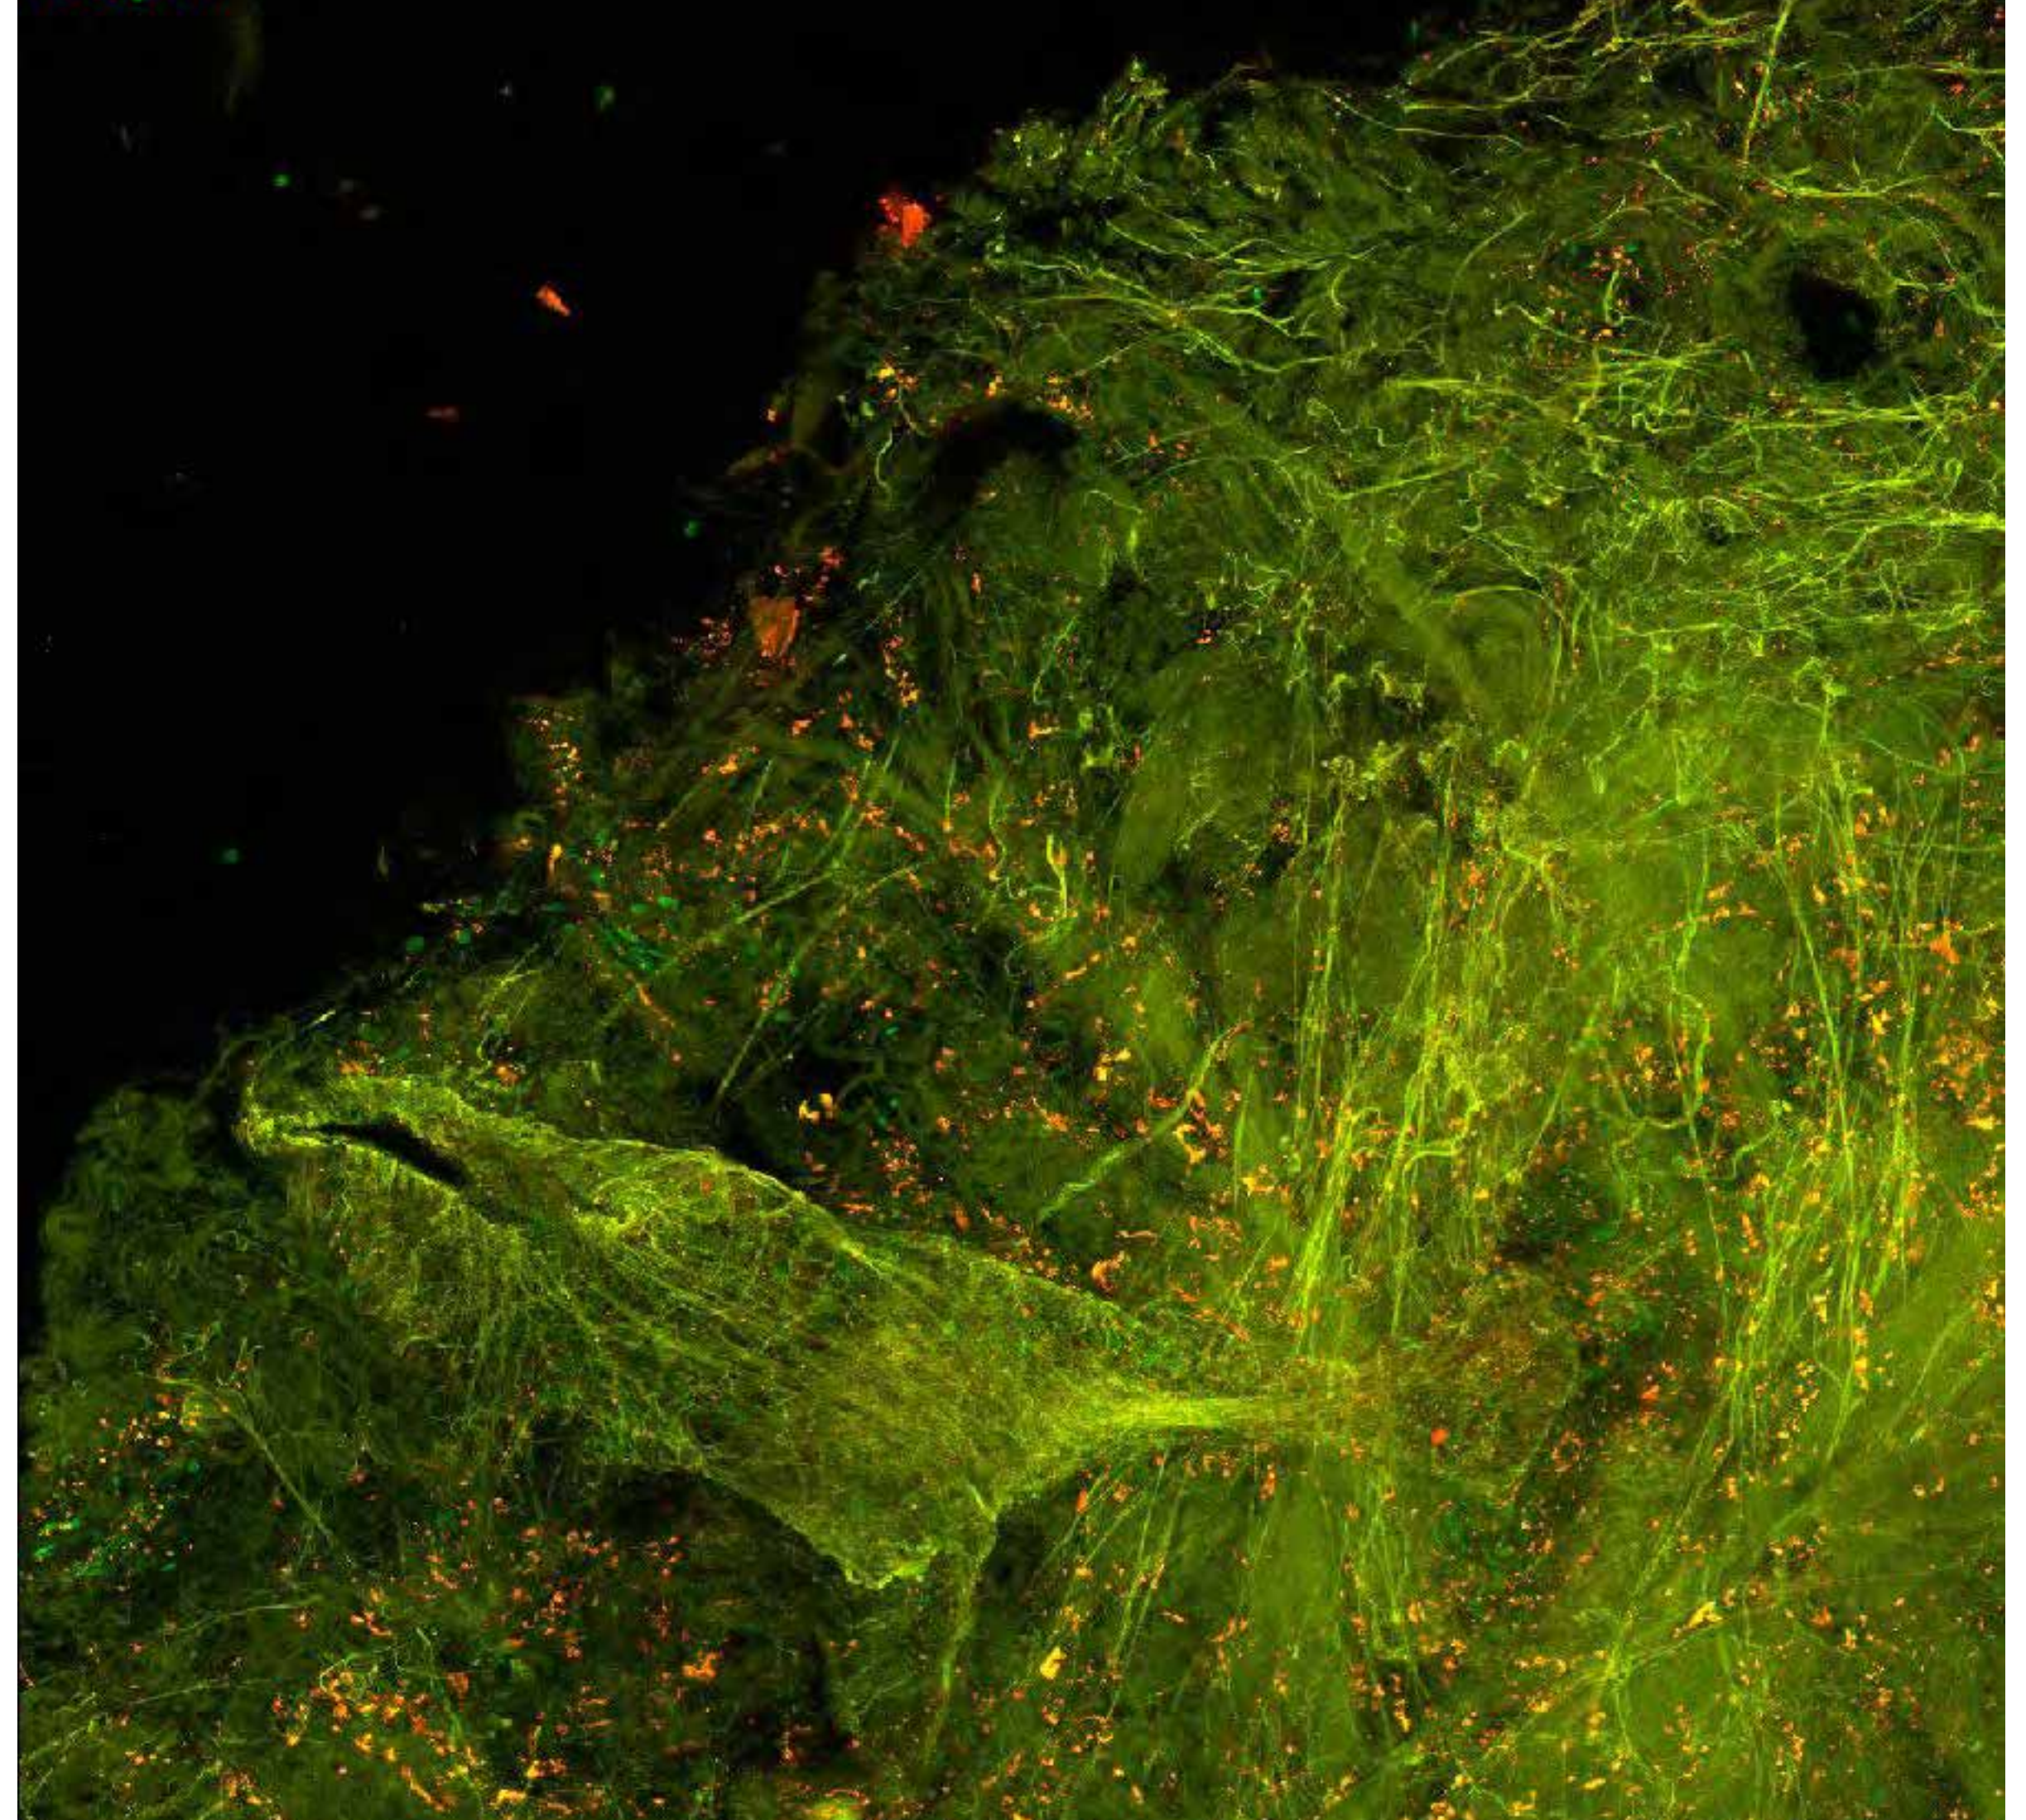

PARPi-FL (green) + Autofluorescence (red/yellow)



3403

Close-up

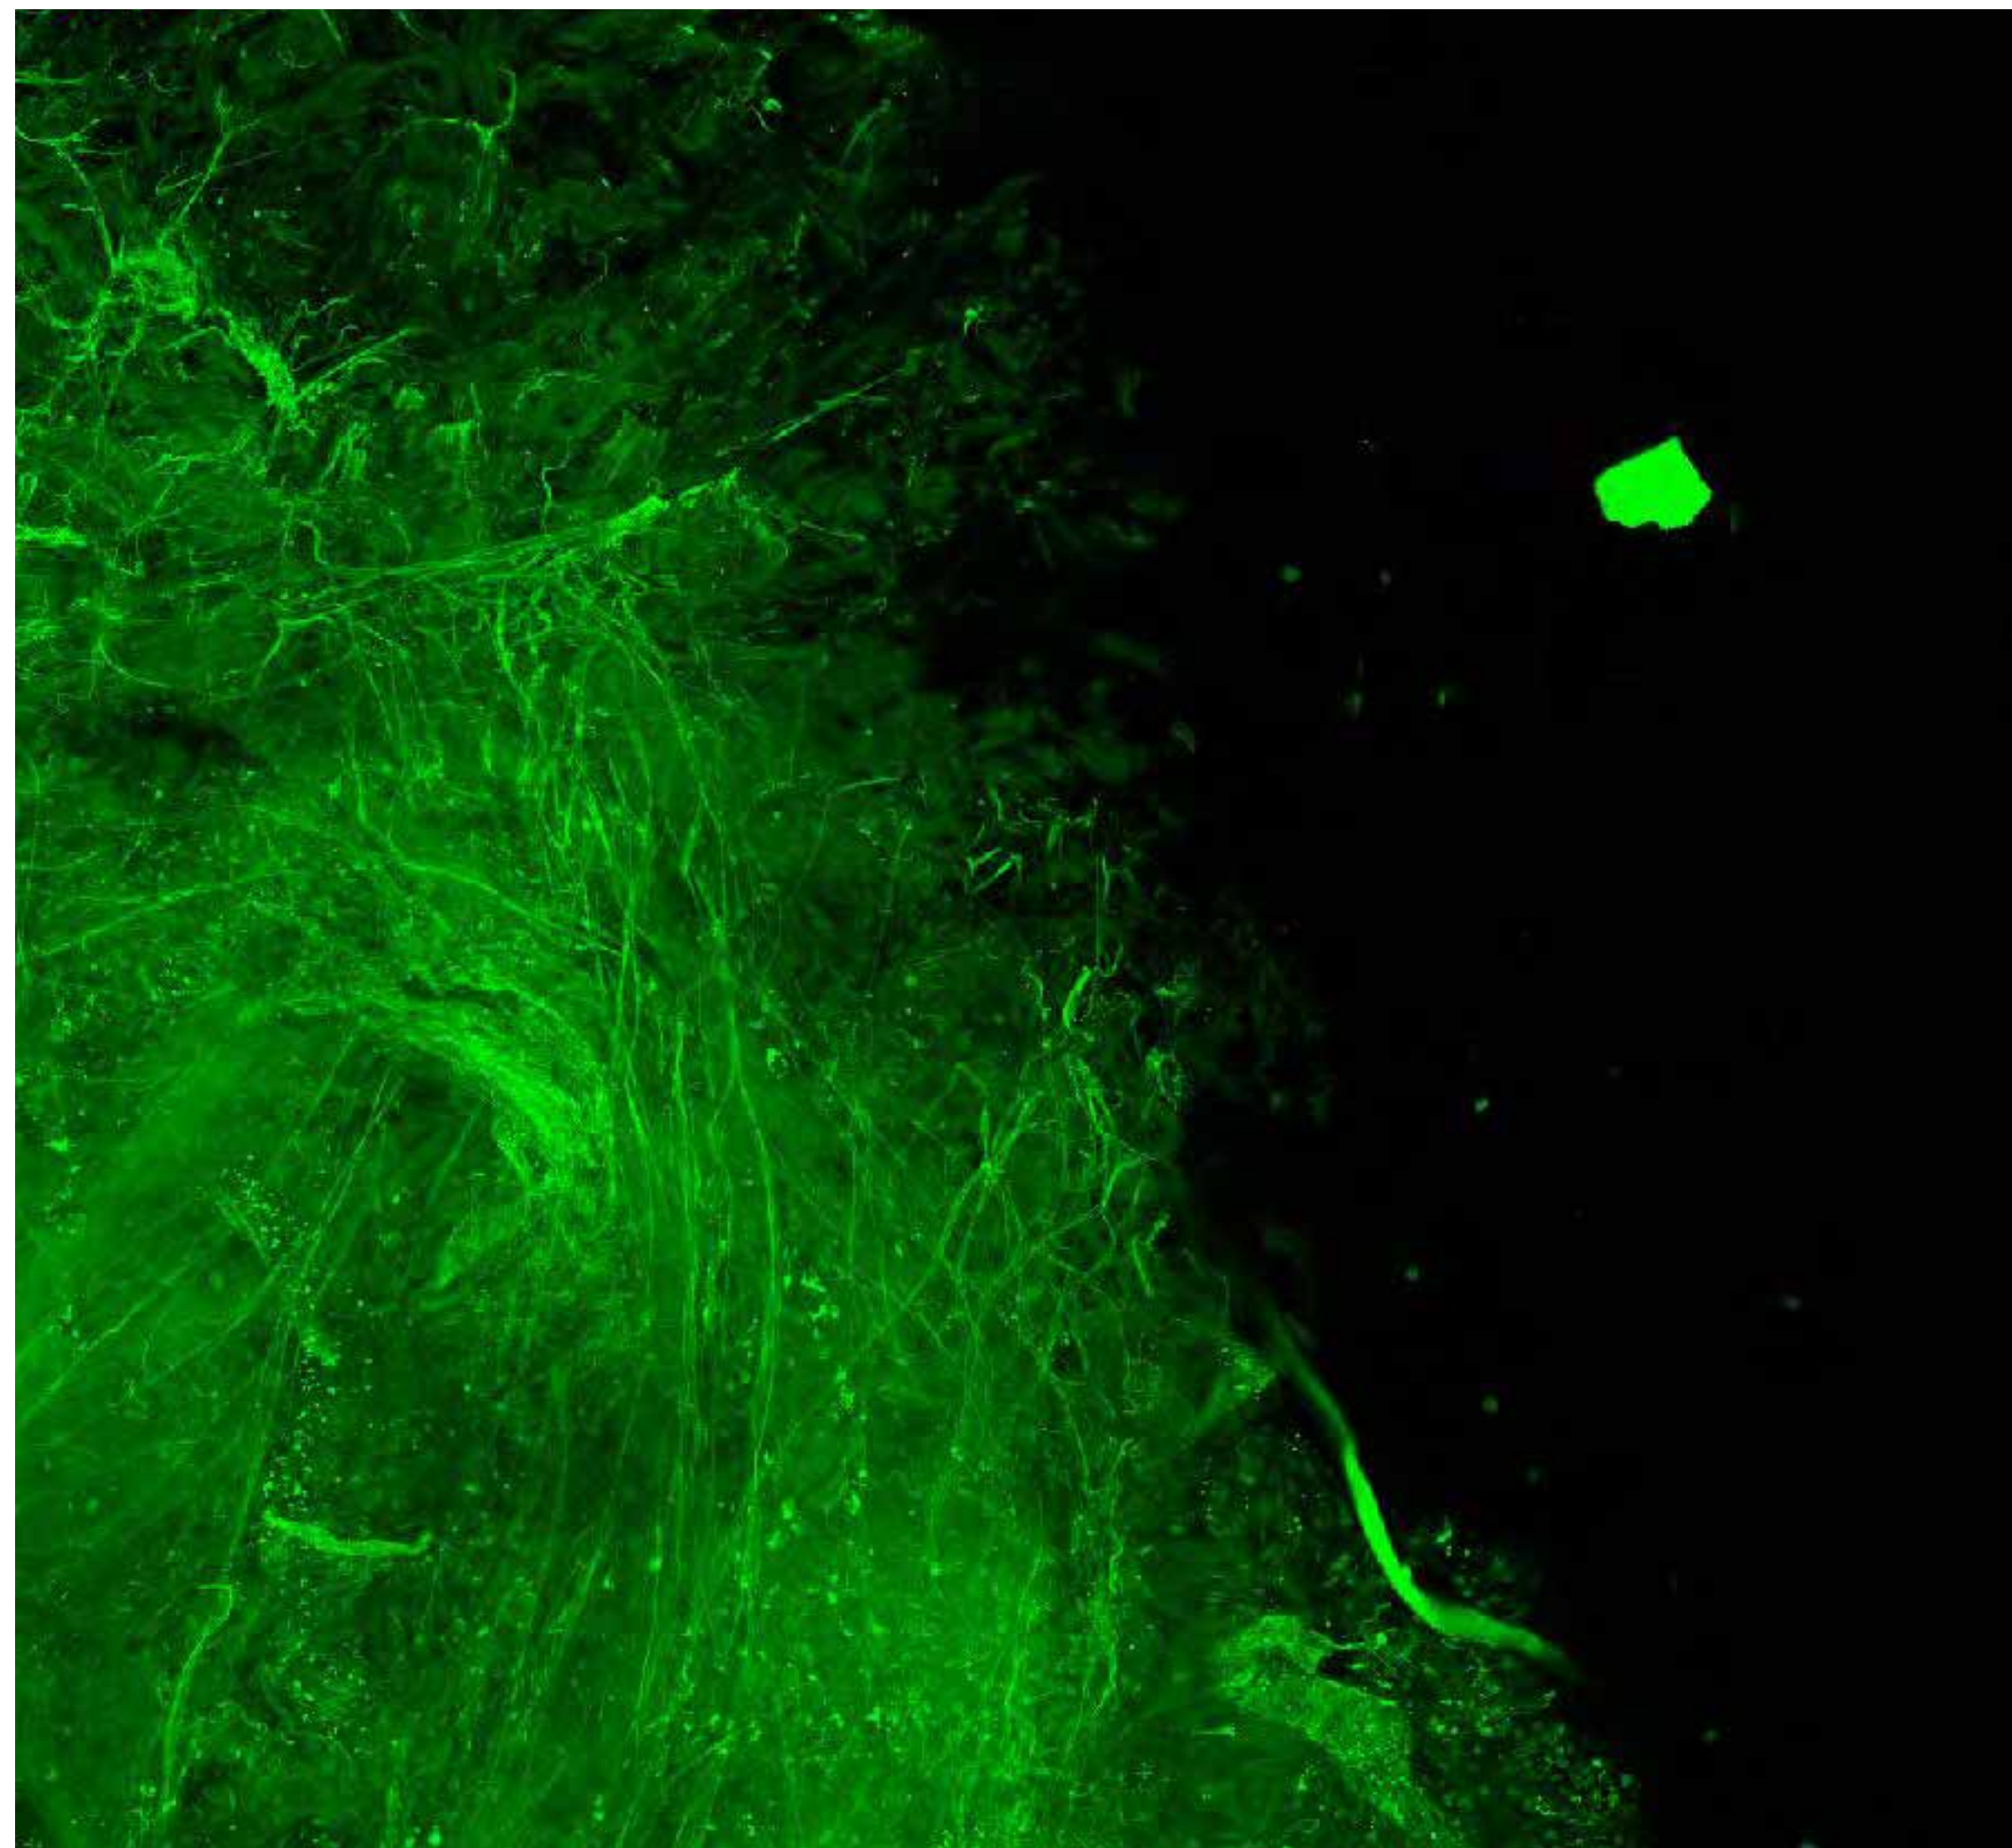

PARPi-FL only (green)

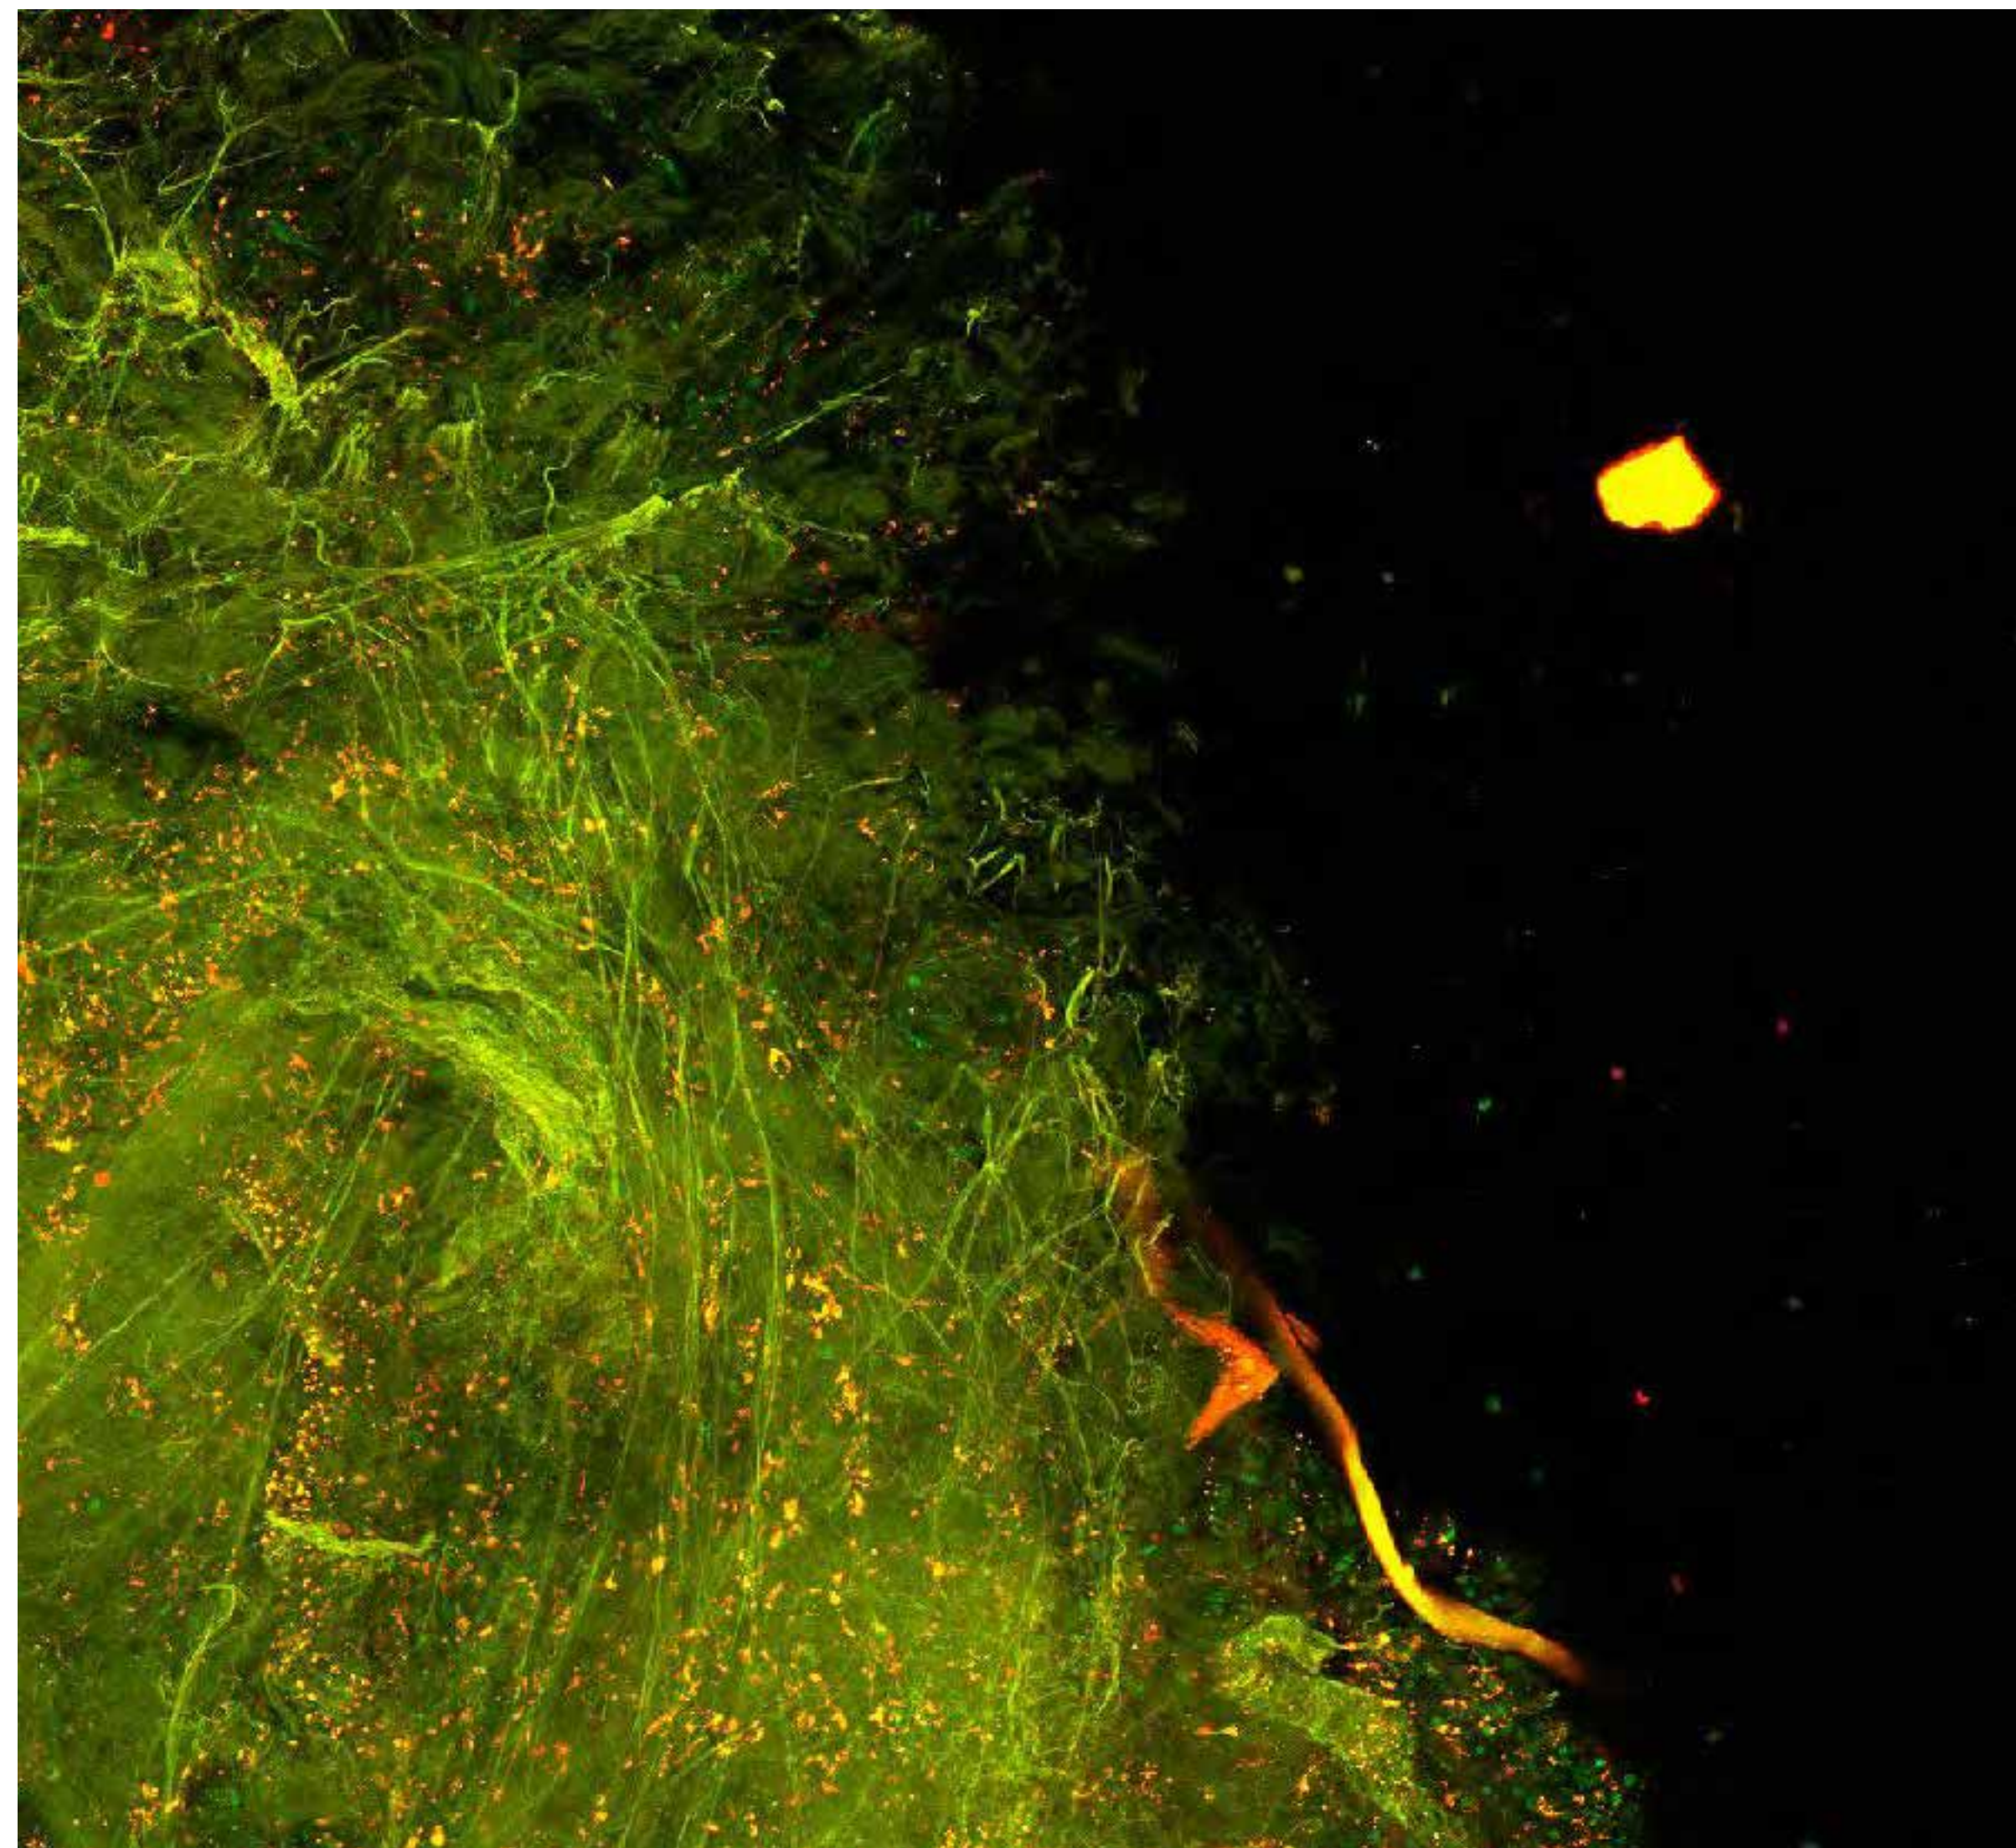

PARPi-FL (green) + Autofluorescence (red/yellow)



3403

Close-up

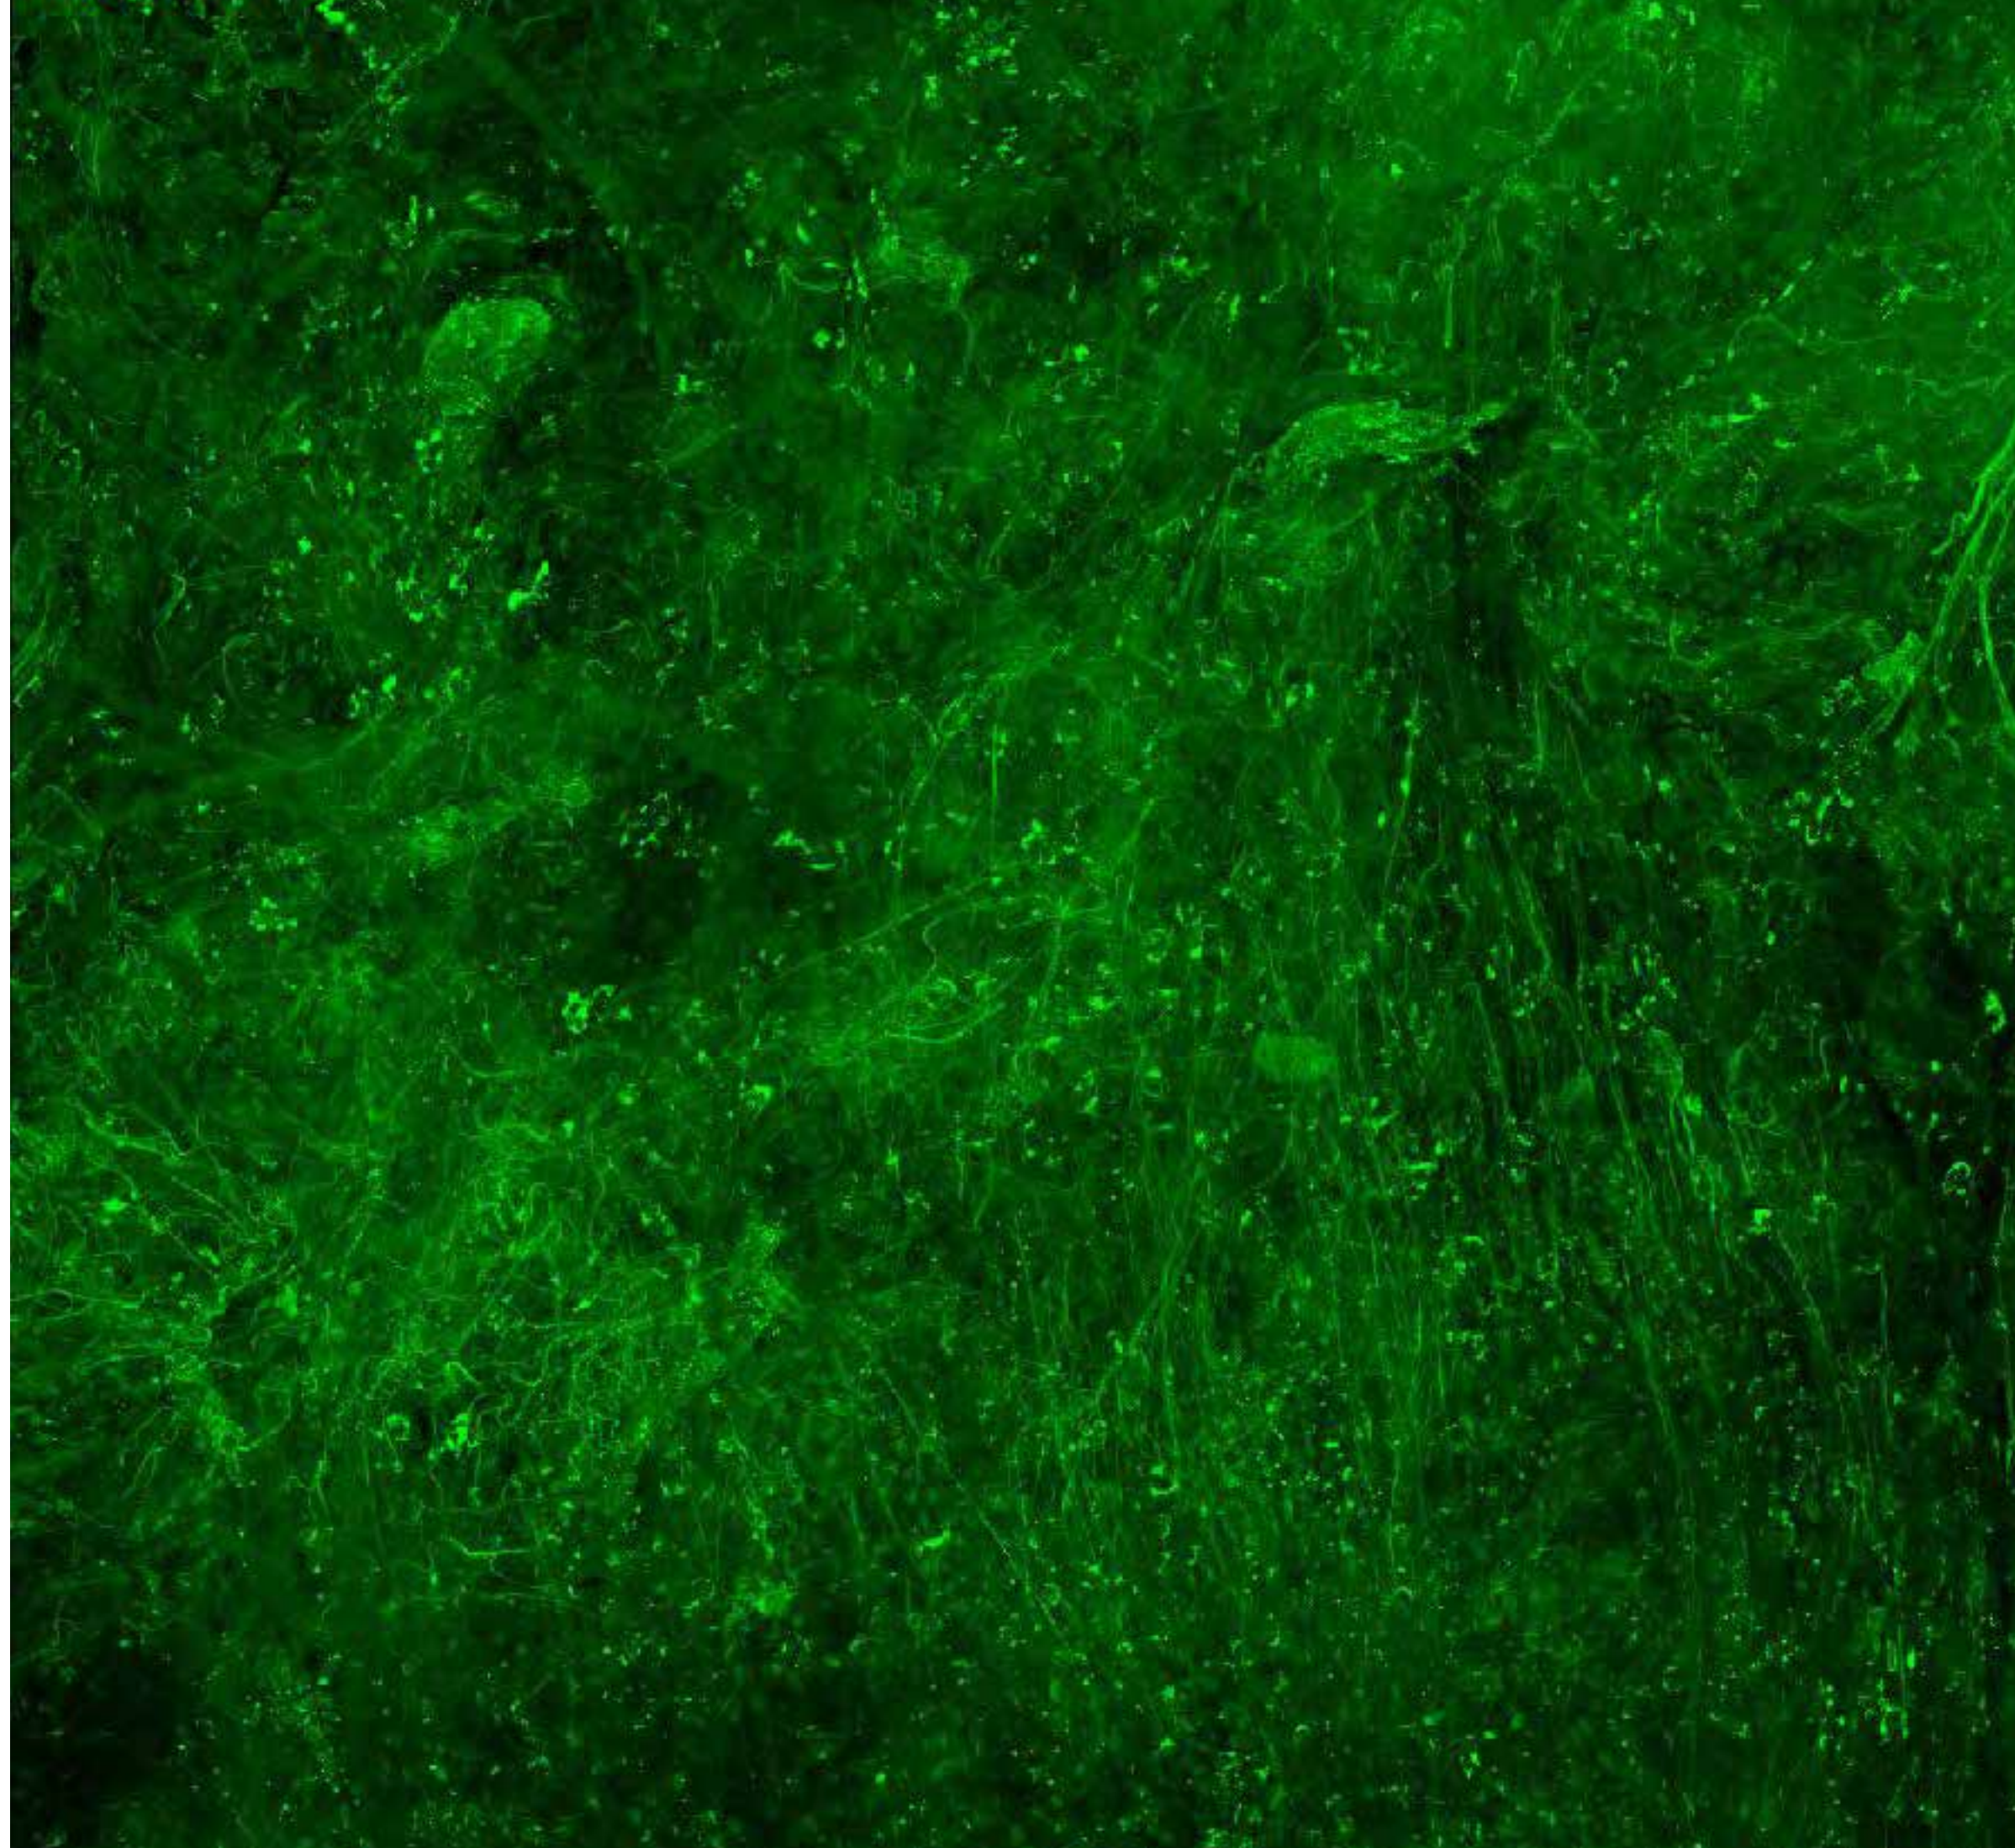

PARPi-FL only (green)

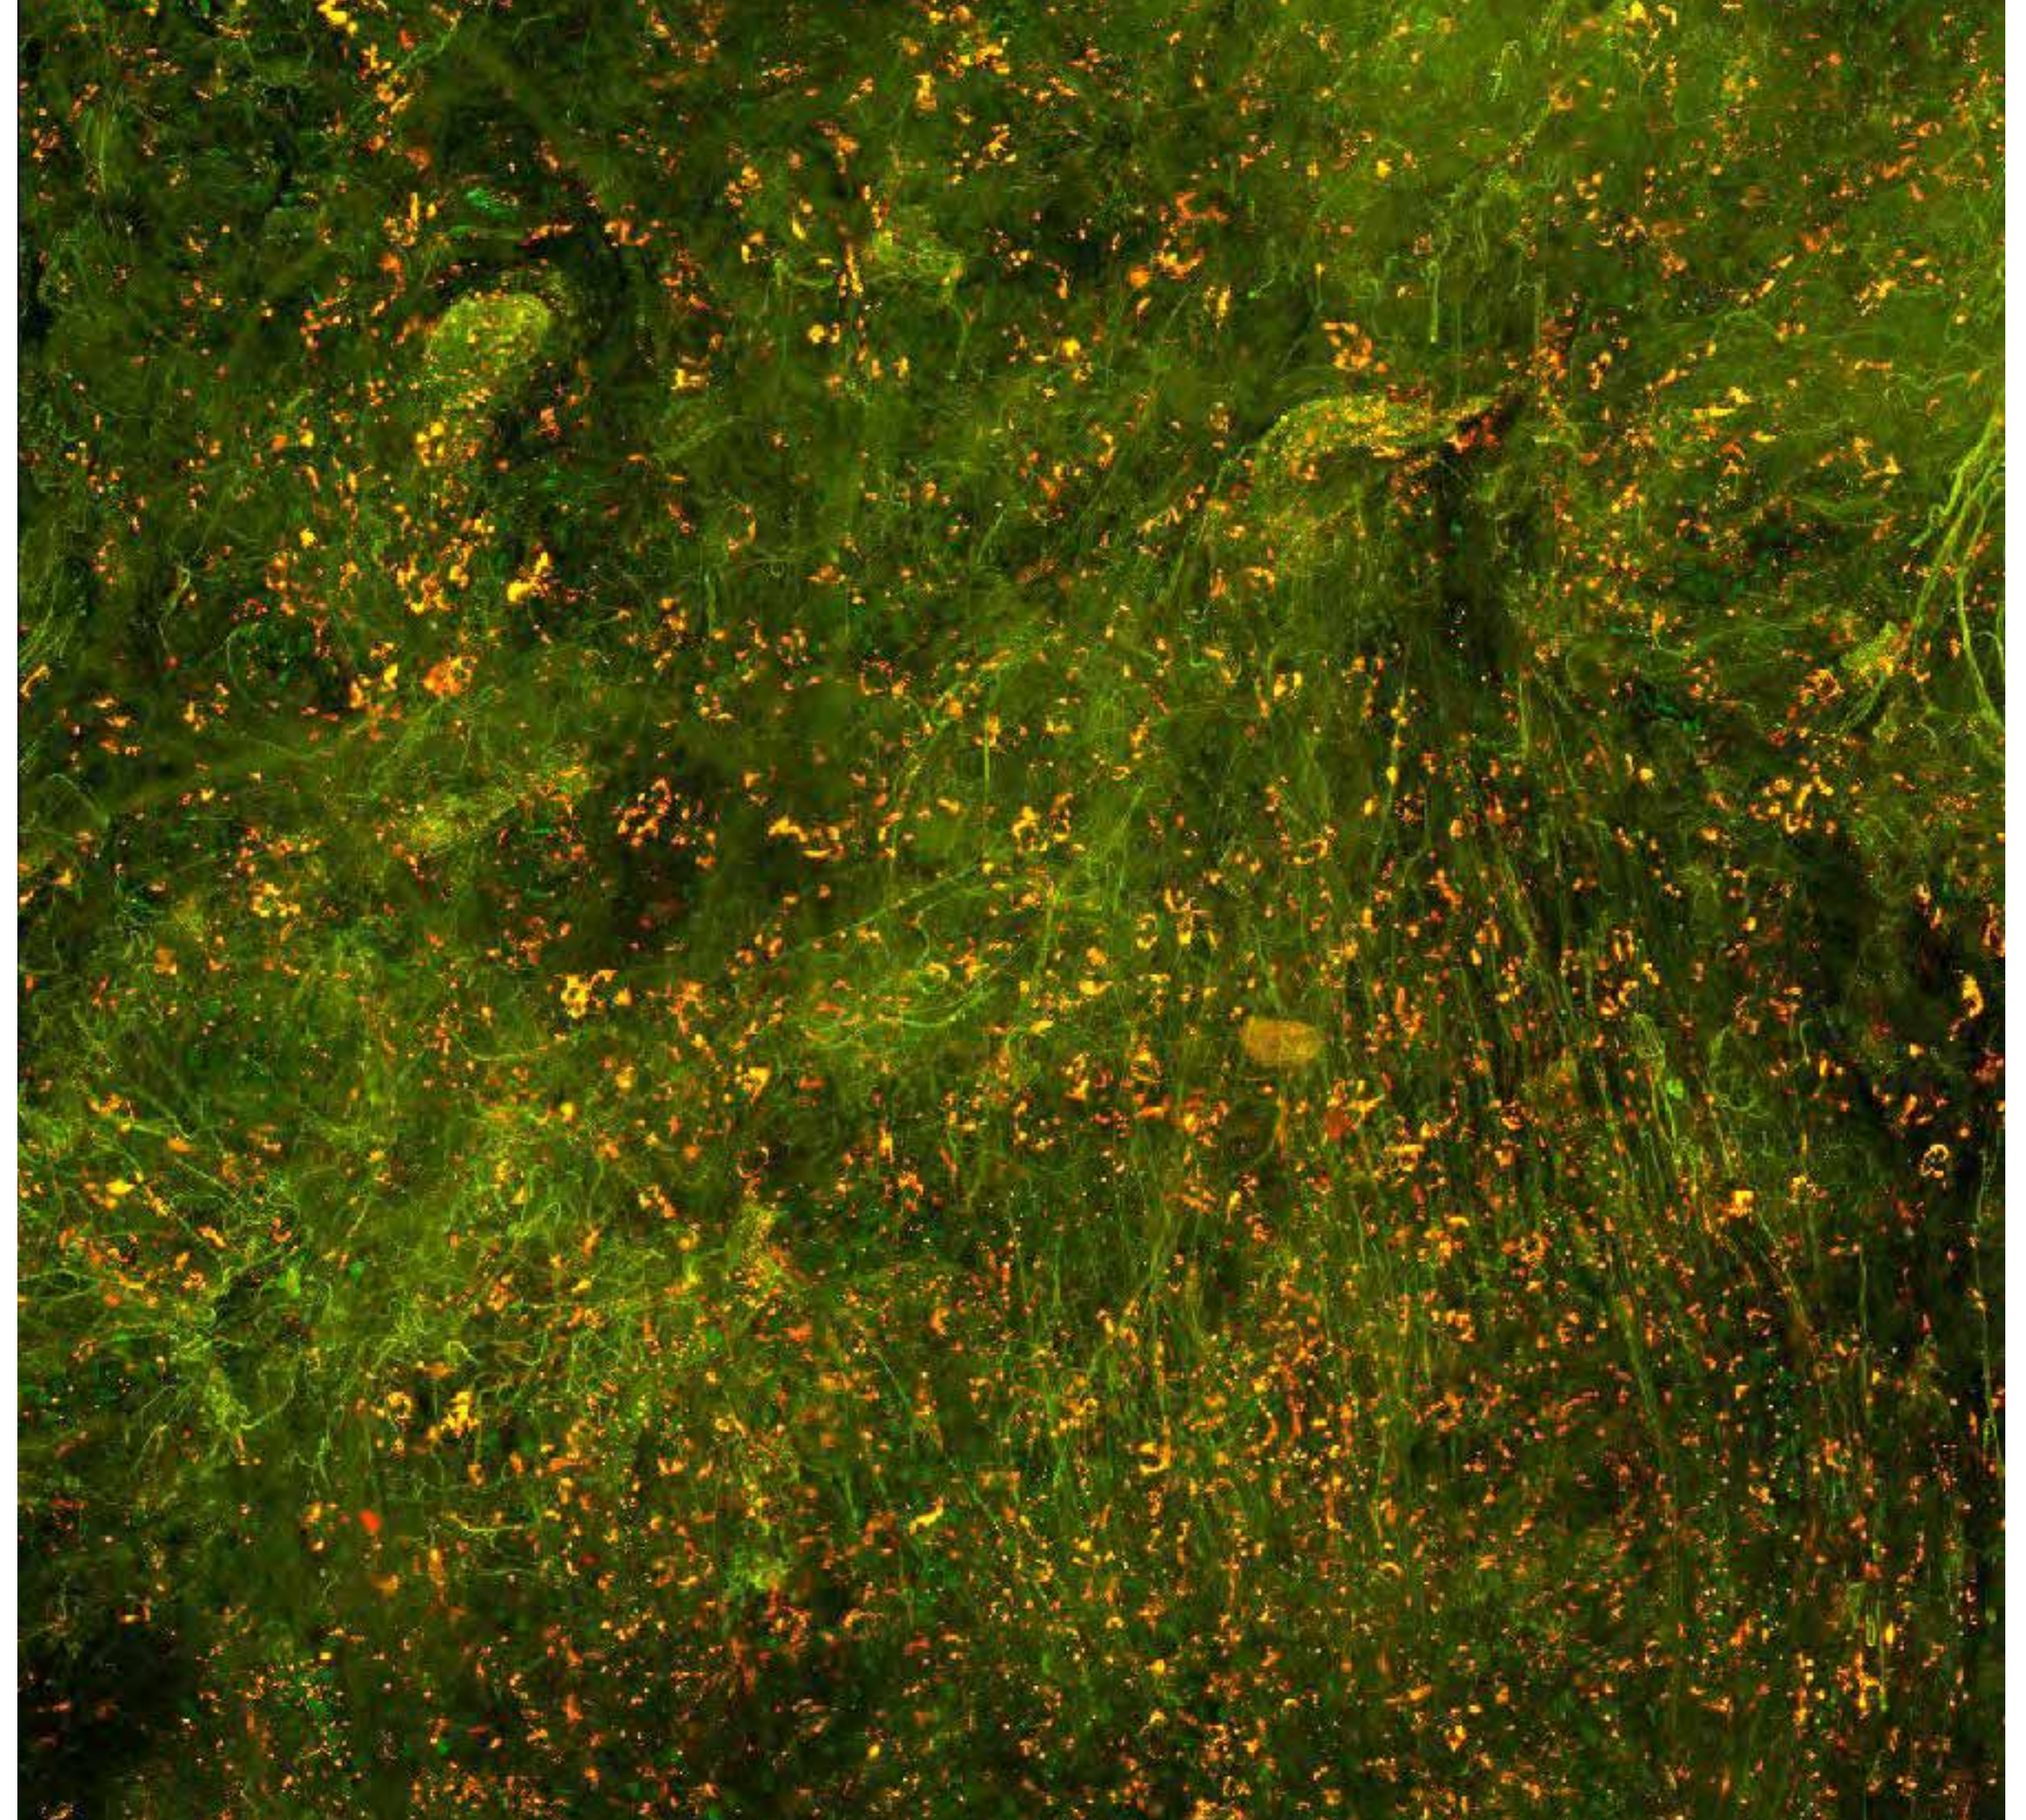

PARPi-FL (green) + Autofluorescence (red/yellow)



3403

Close-up

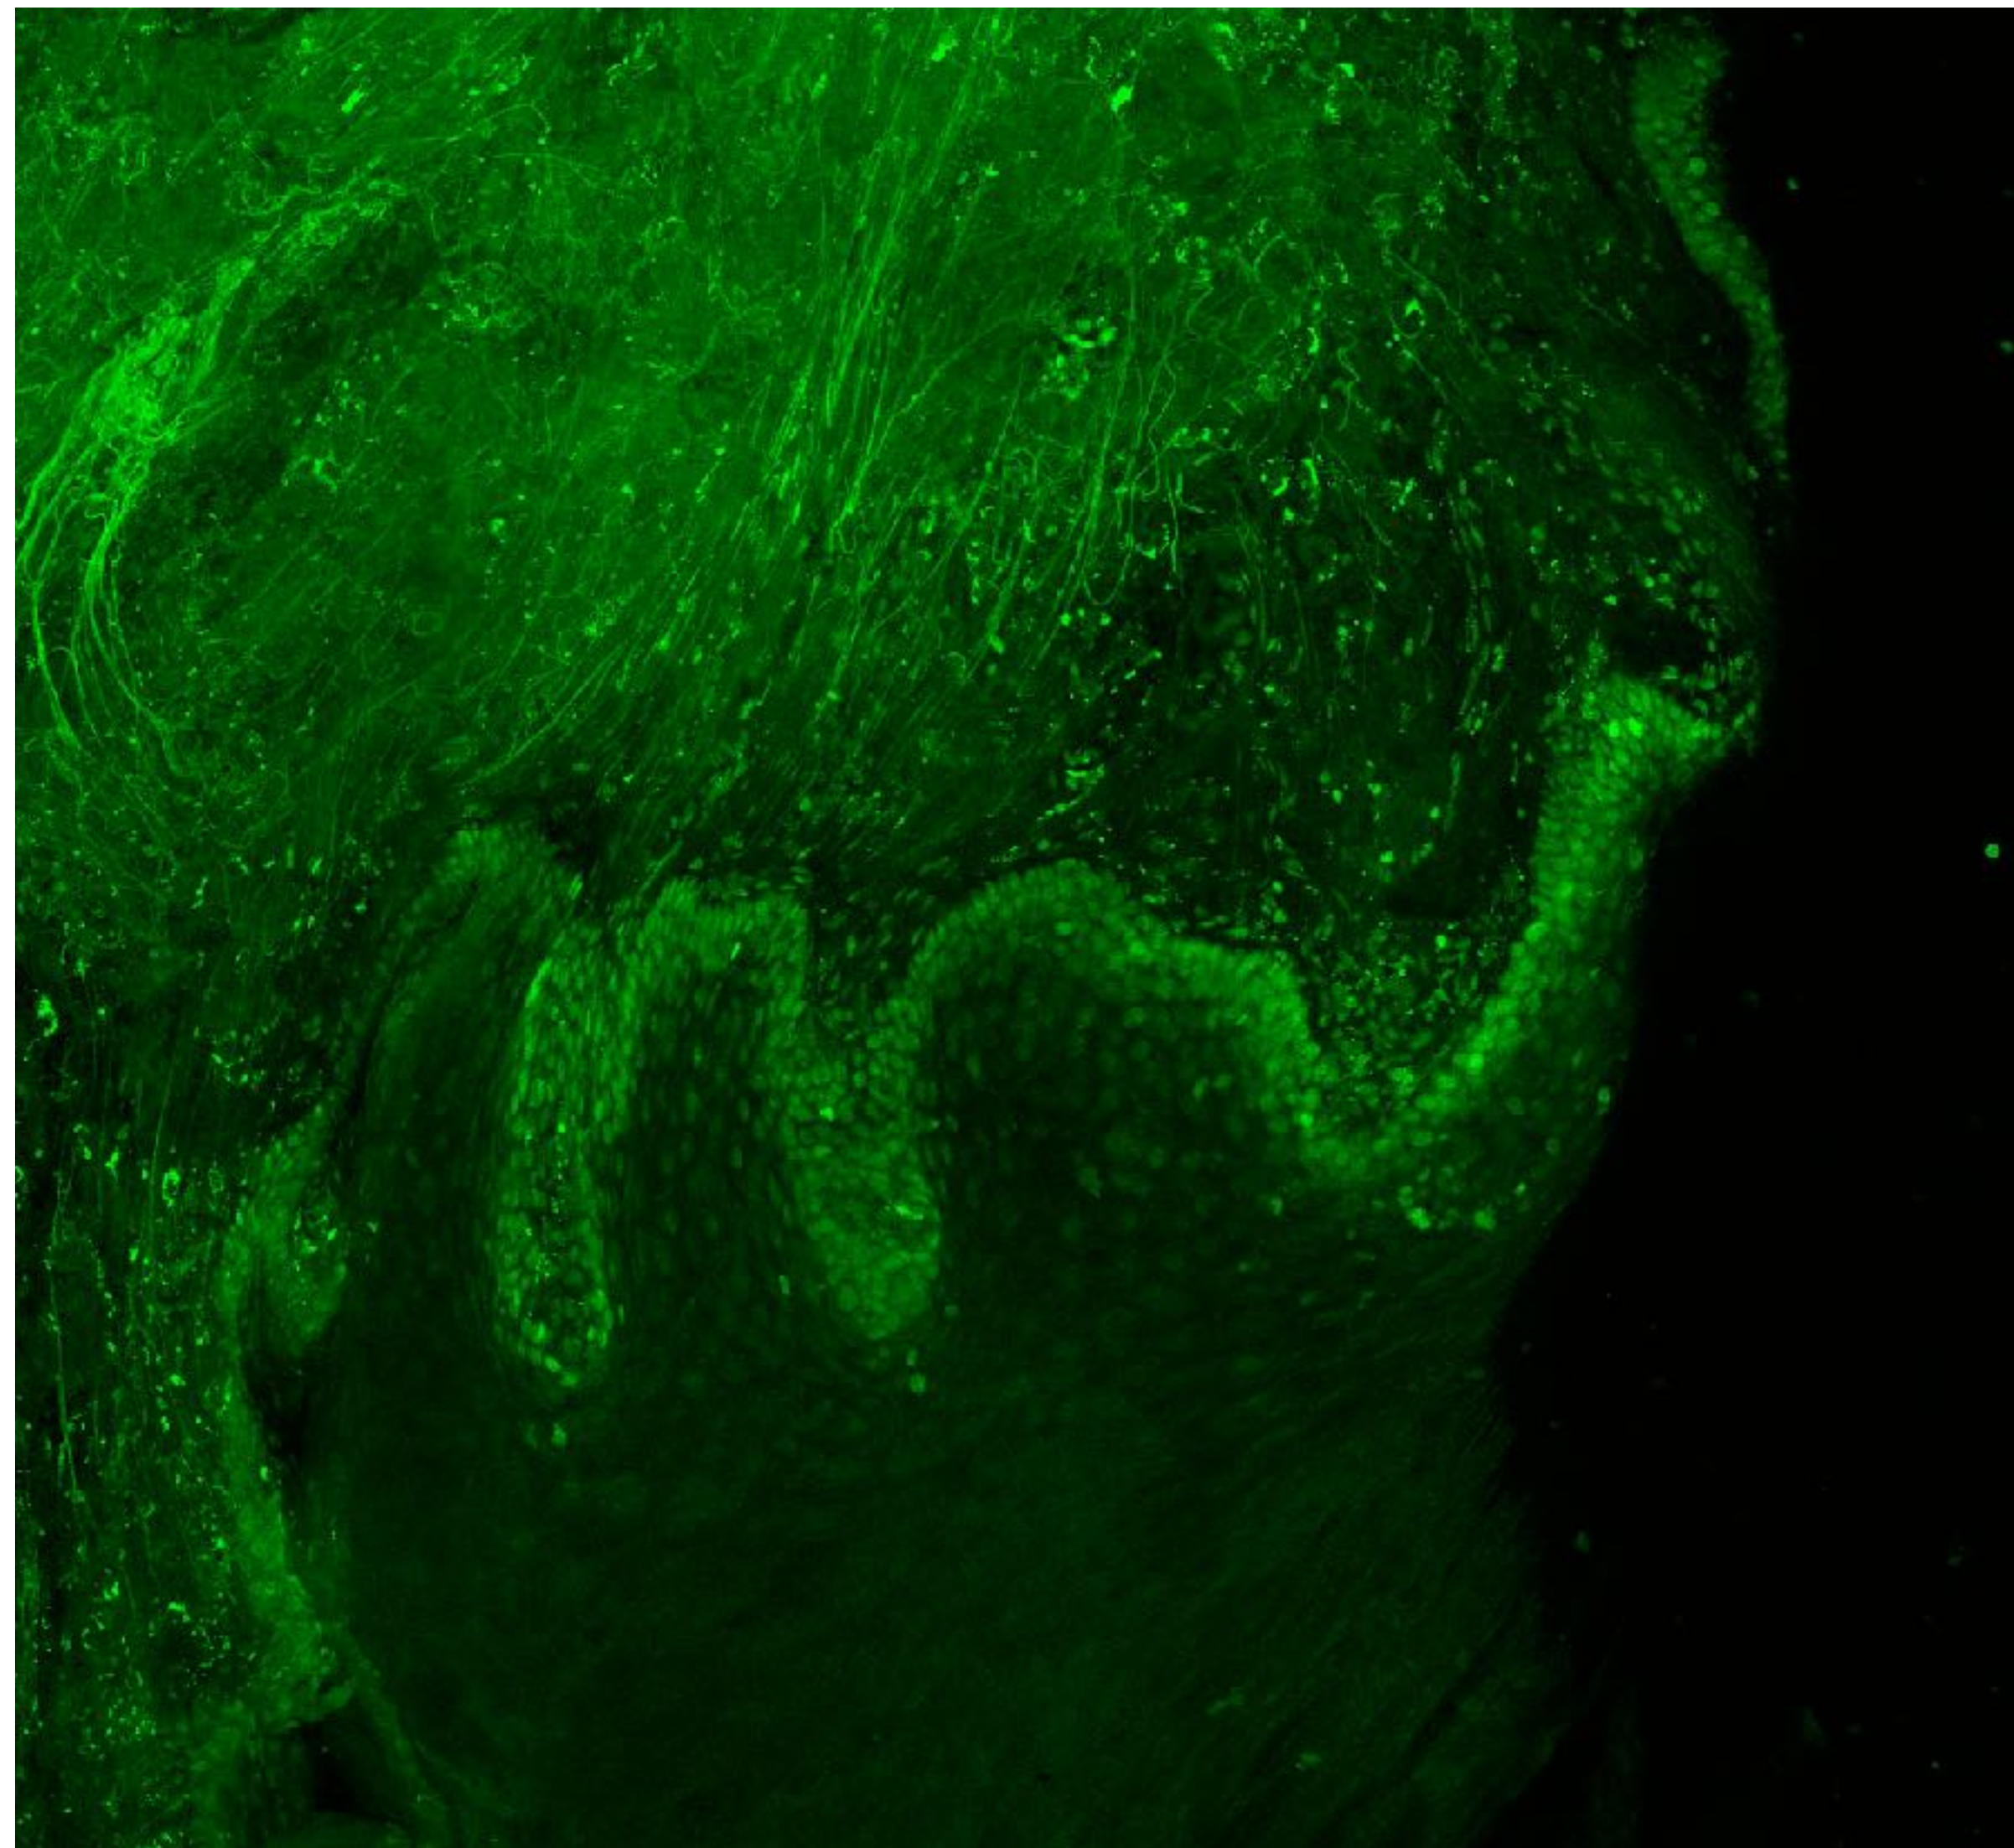

PARPi-FL only (green)

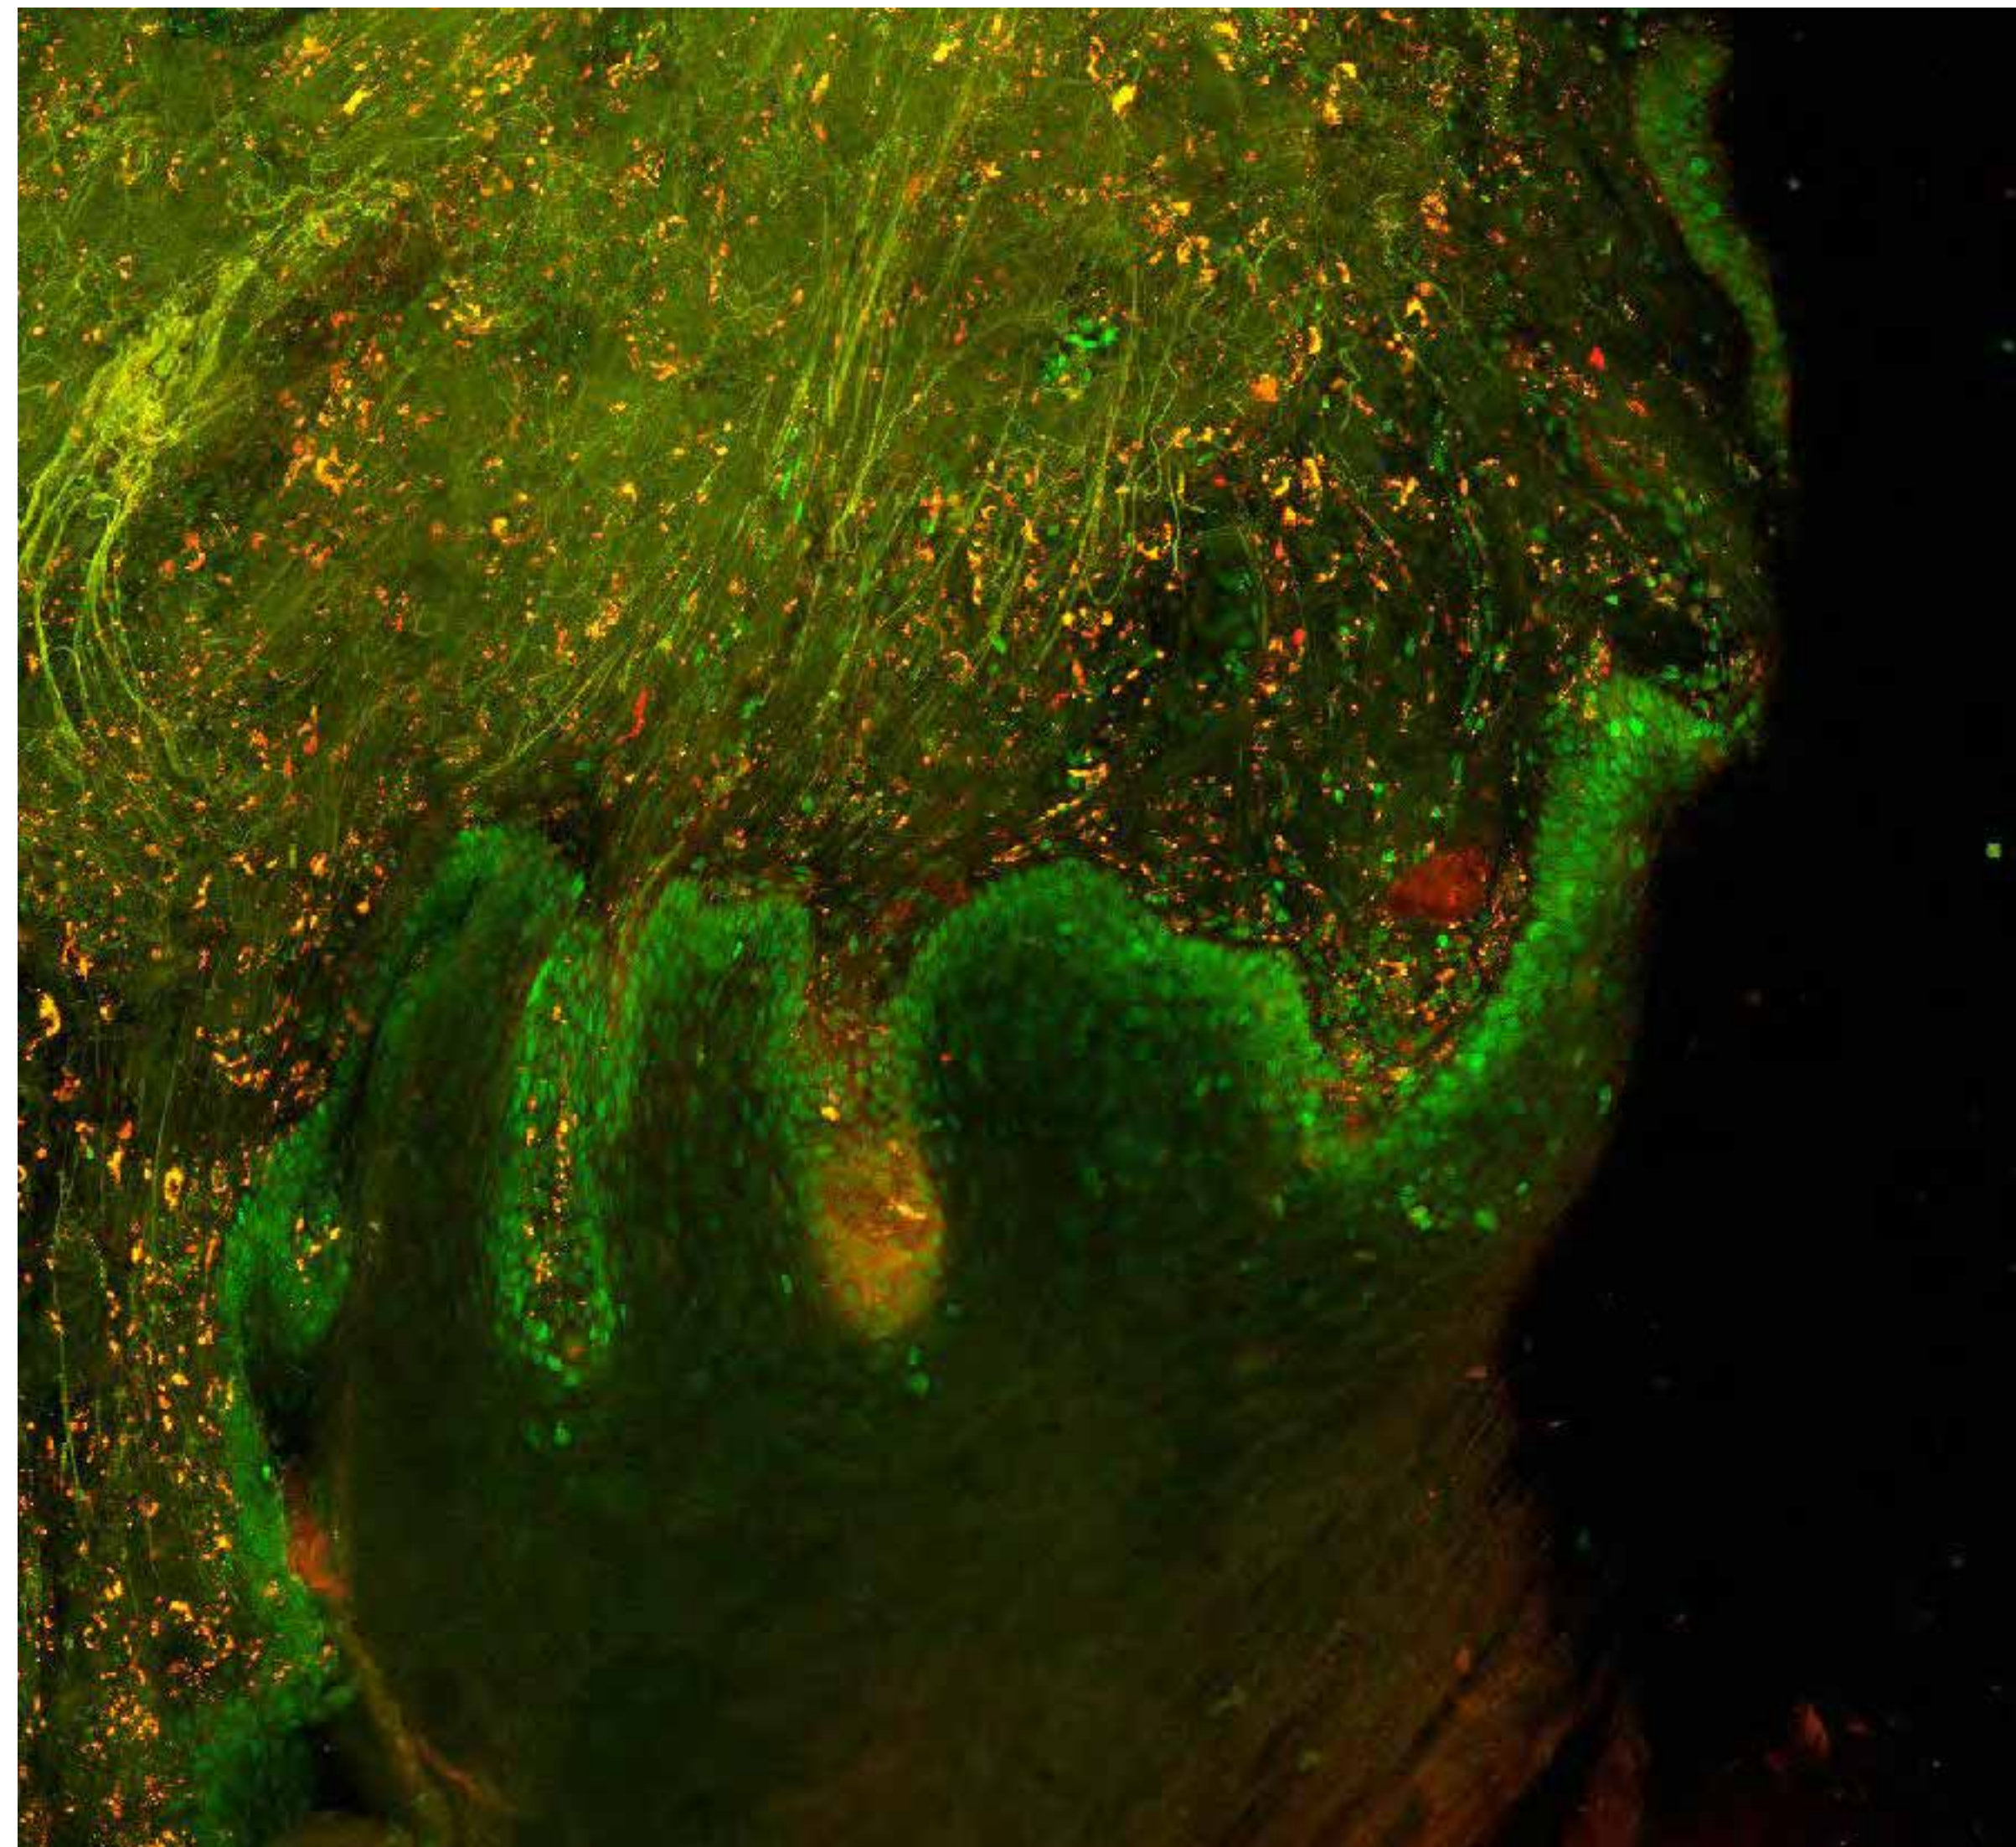

PARPi-FL (green) + Autofluorescence (red/yellow)



3403

10

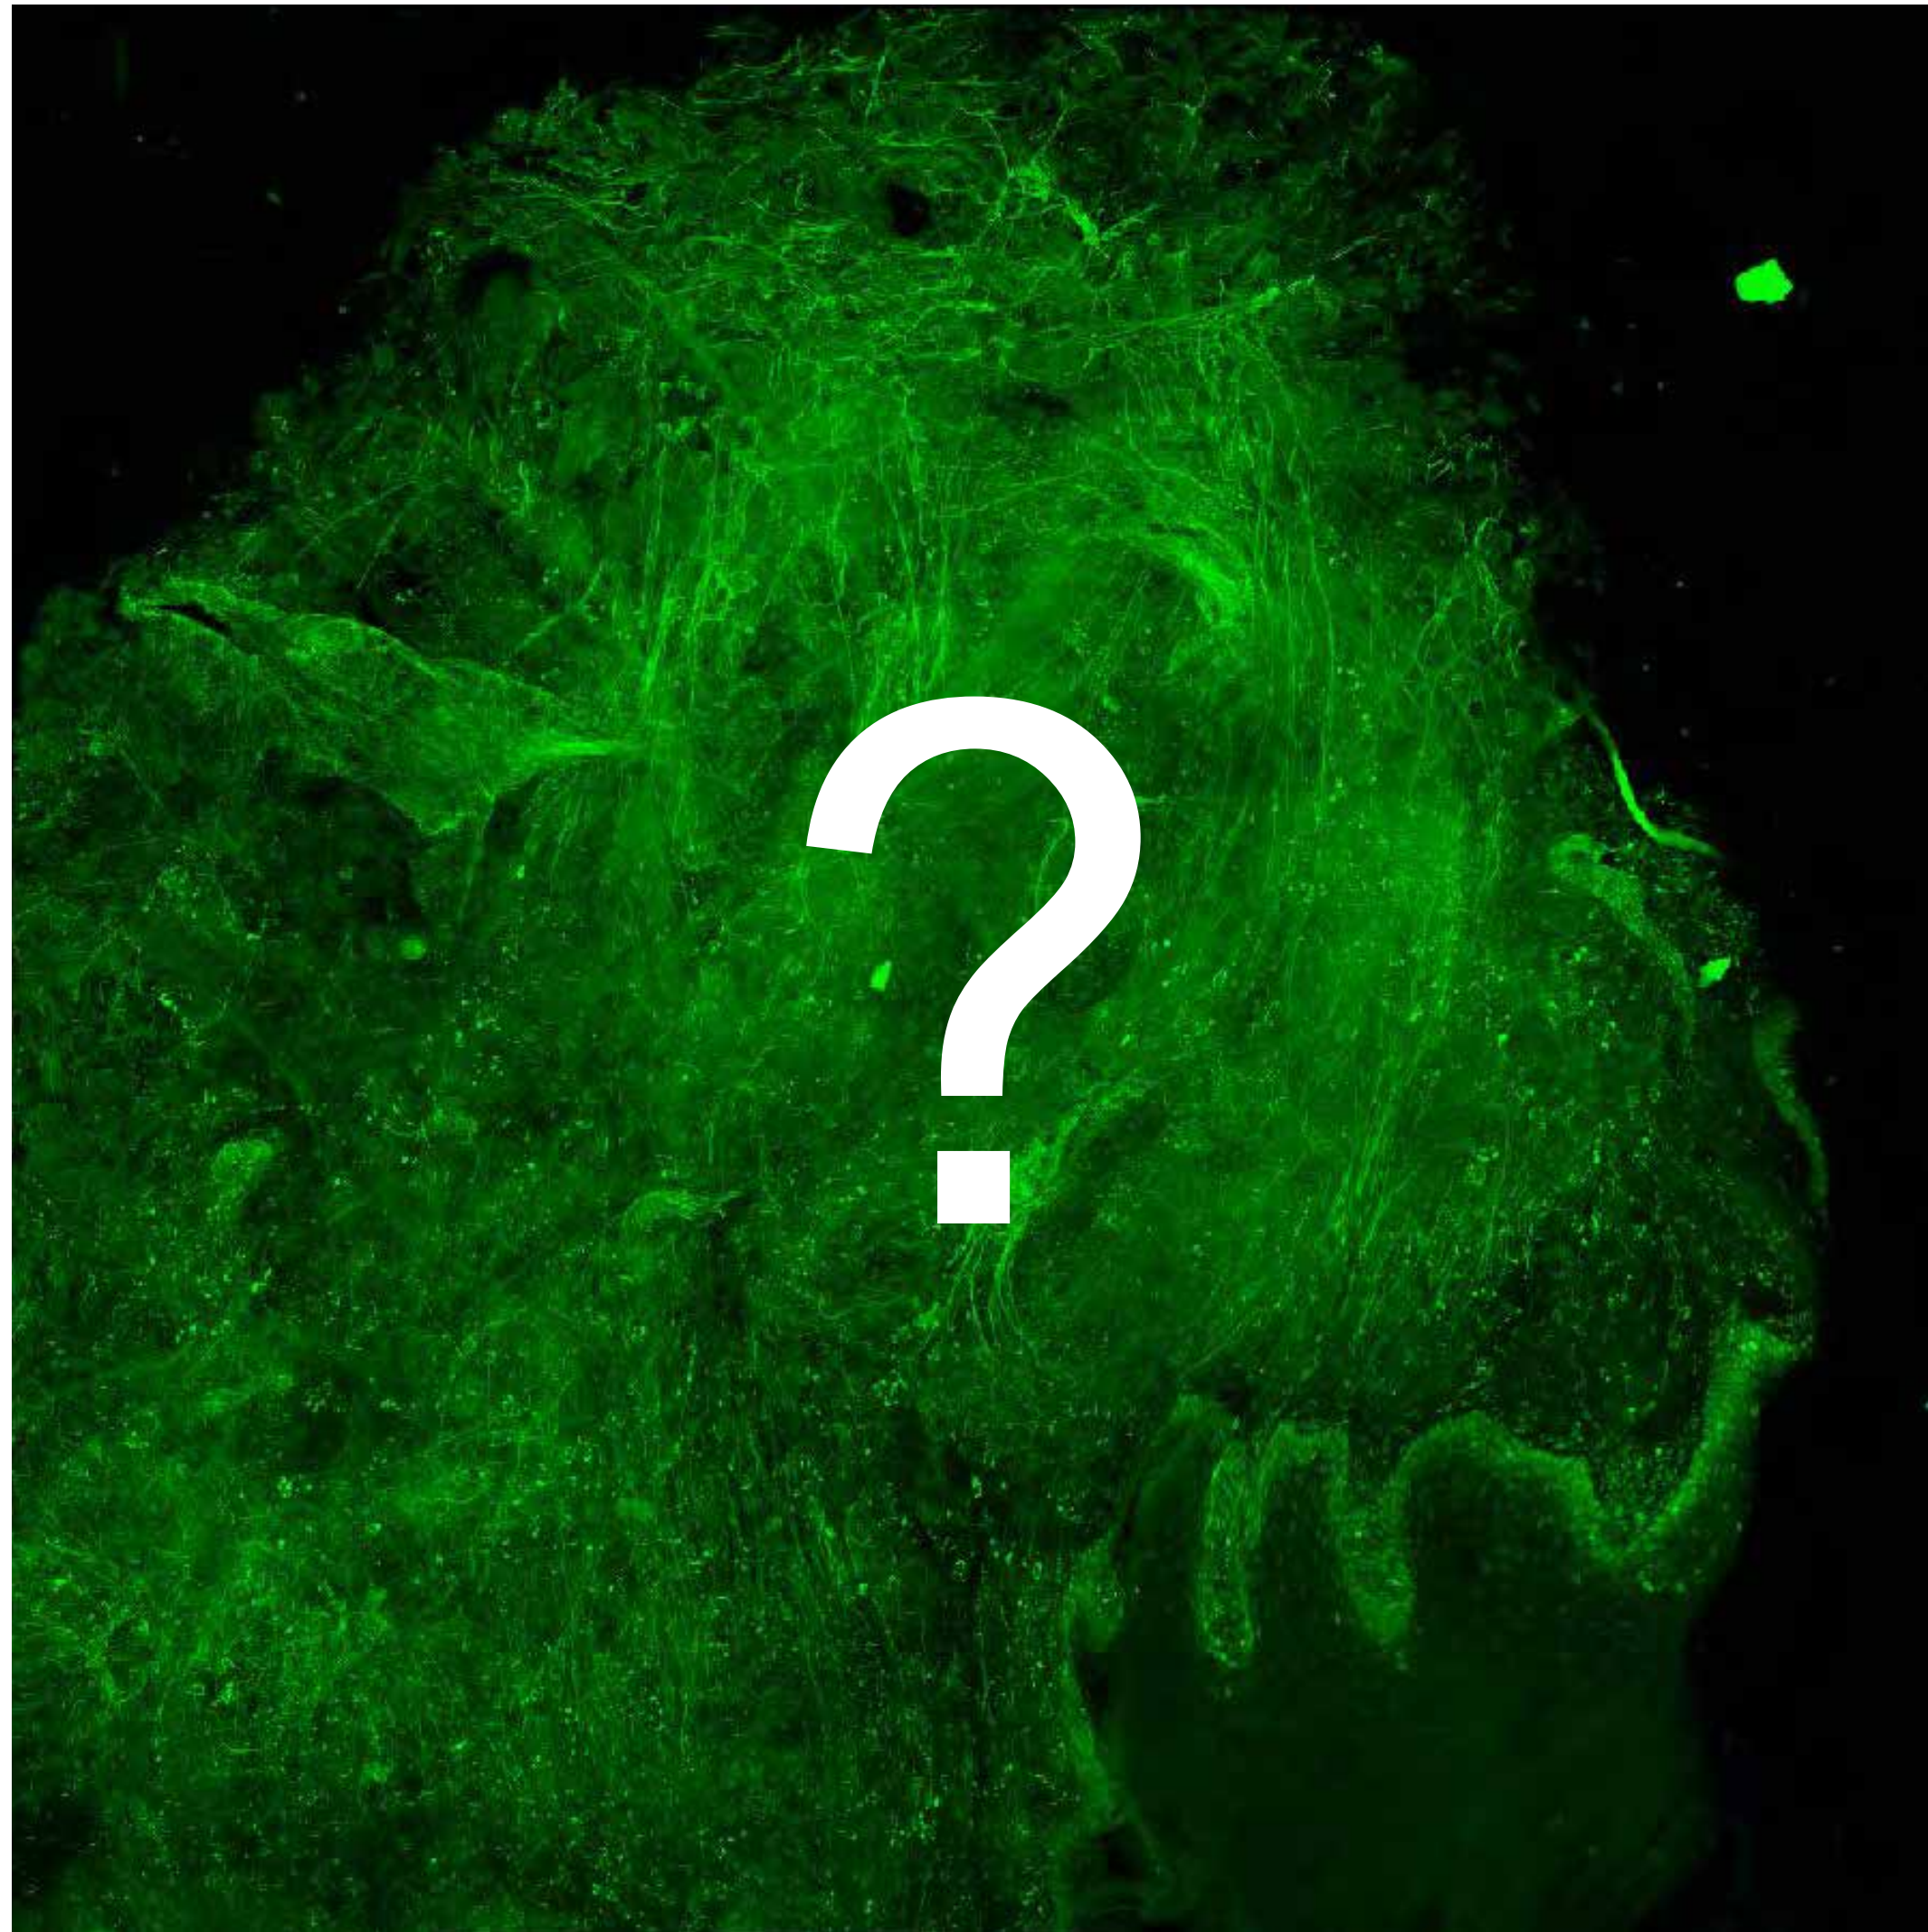

Tumor

Margin



3460

# Overview

Not available

Not available

PARPi-FL only (green)

PARPi-FL (green) + Autofluorescence (red/yellow)



3460

Close-up

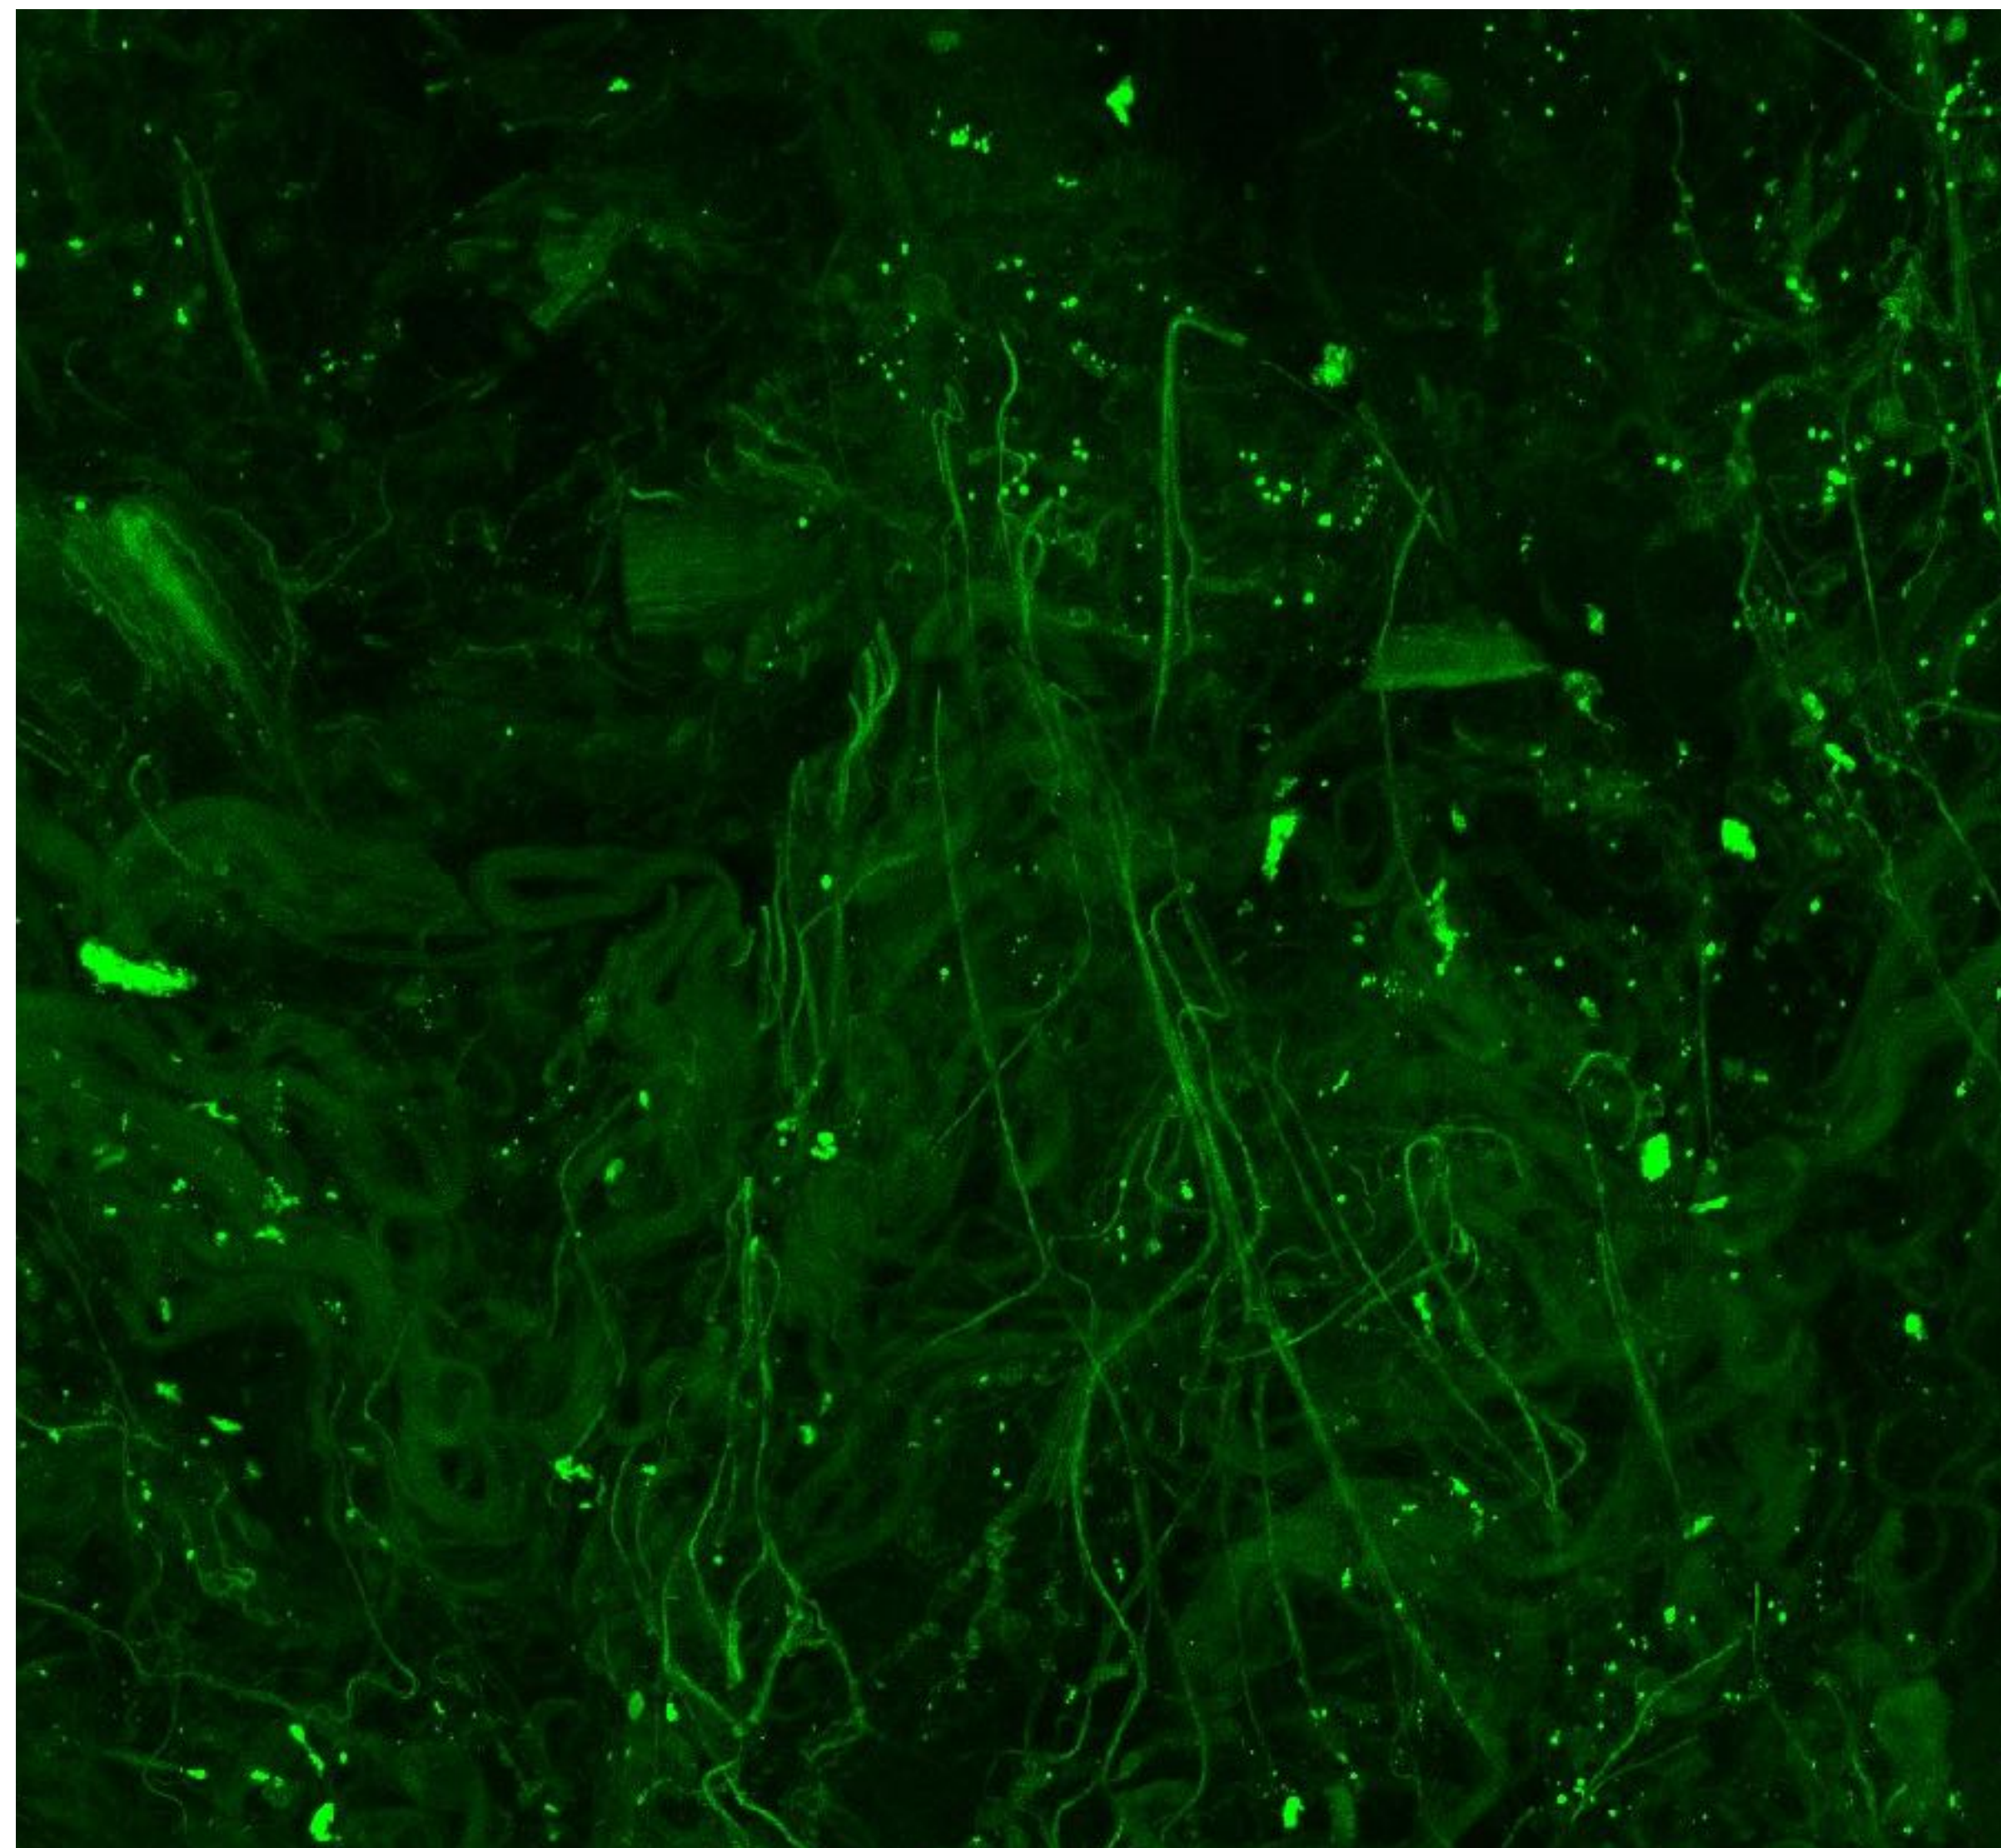

Not available

PARPi-FL only (green)

PARPi-FL (green) + Autofluorescence (red/yellow)



3460

10

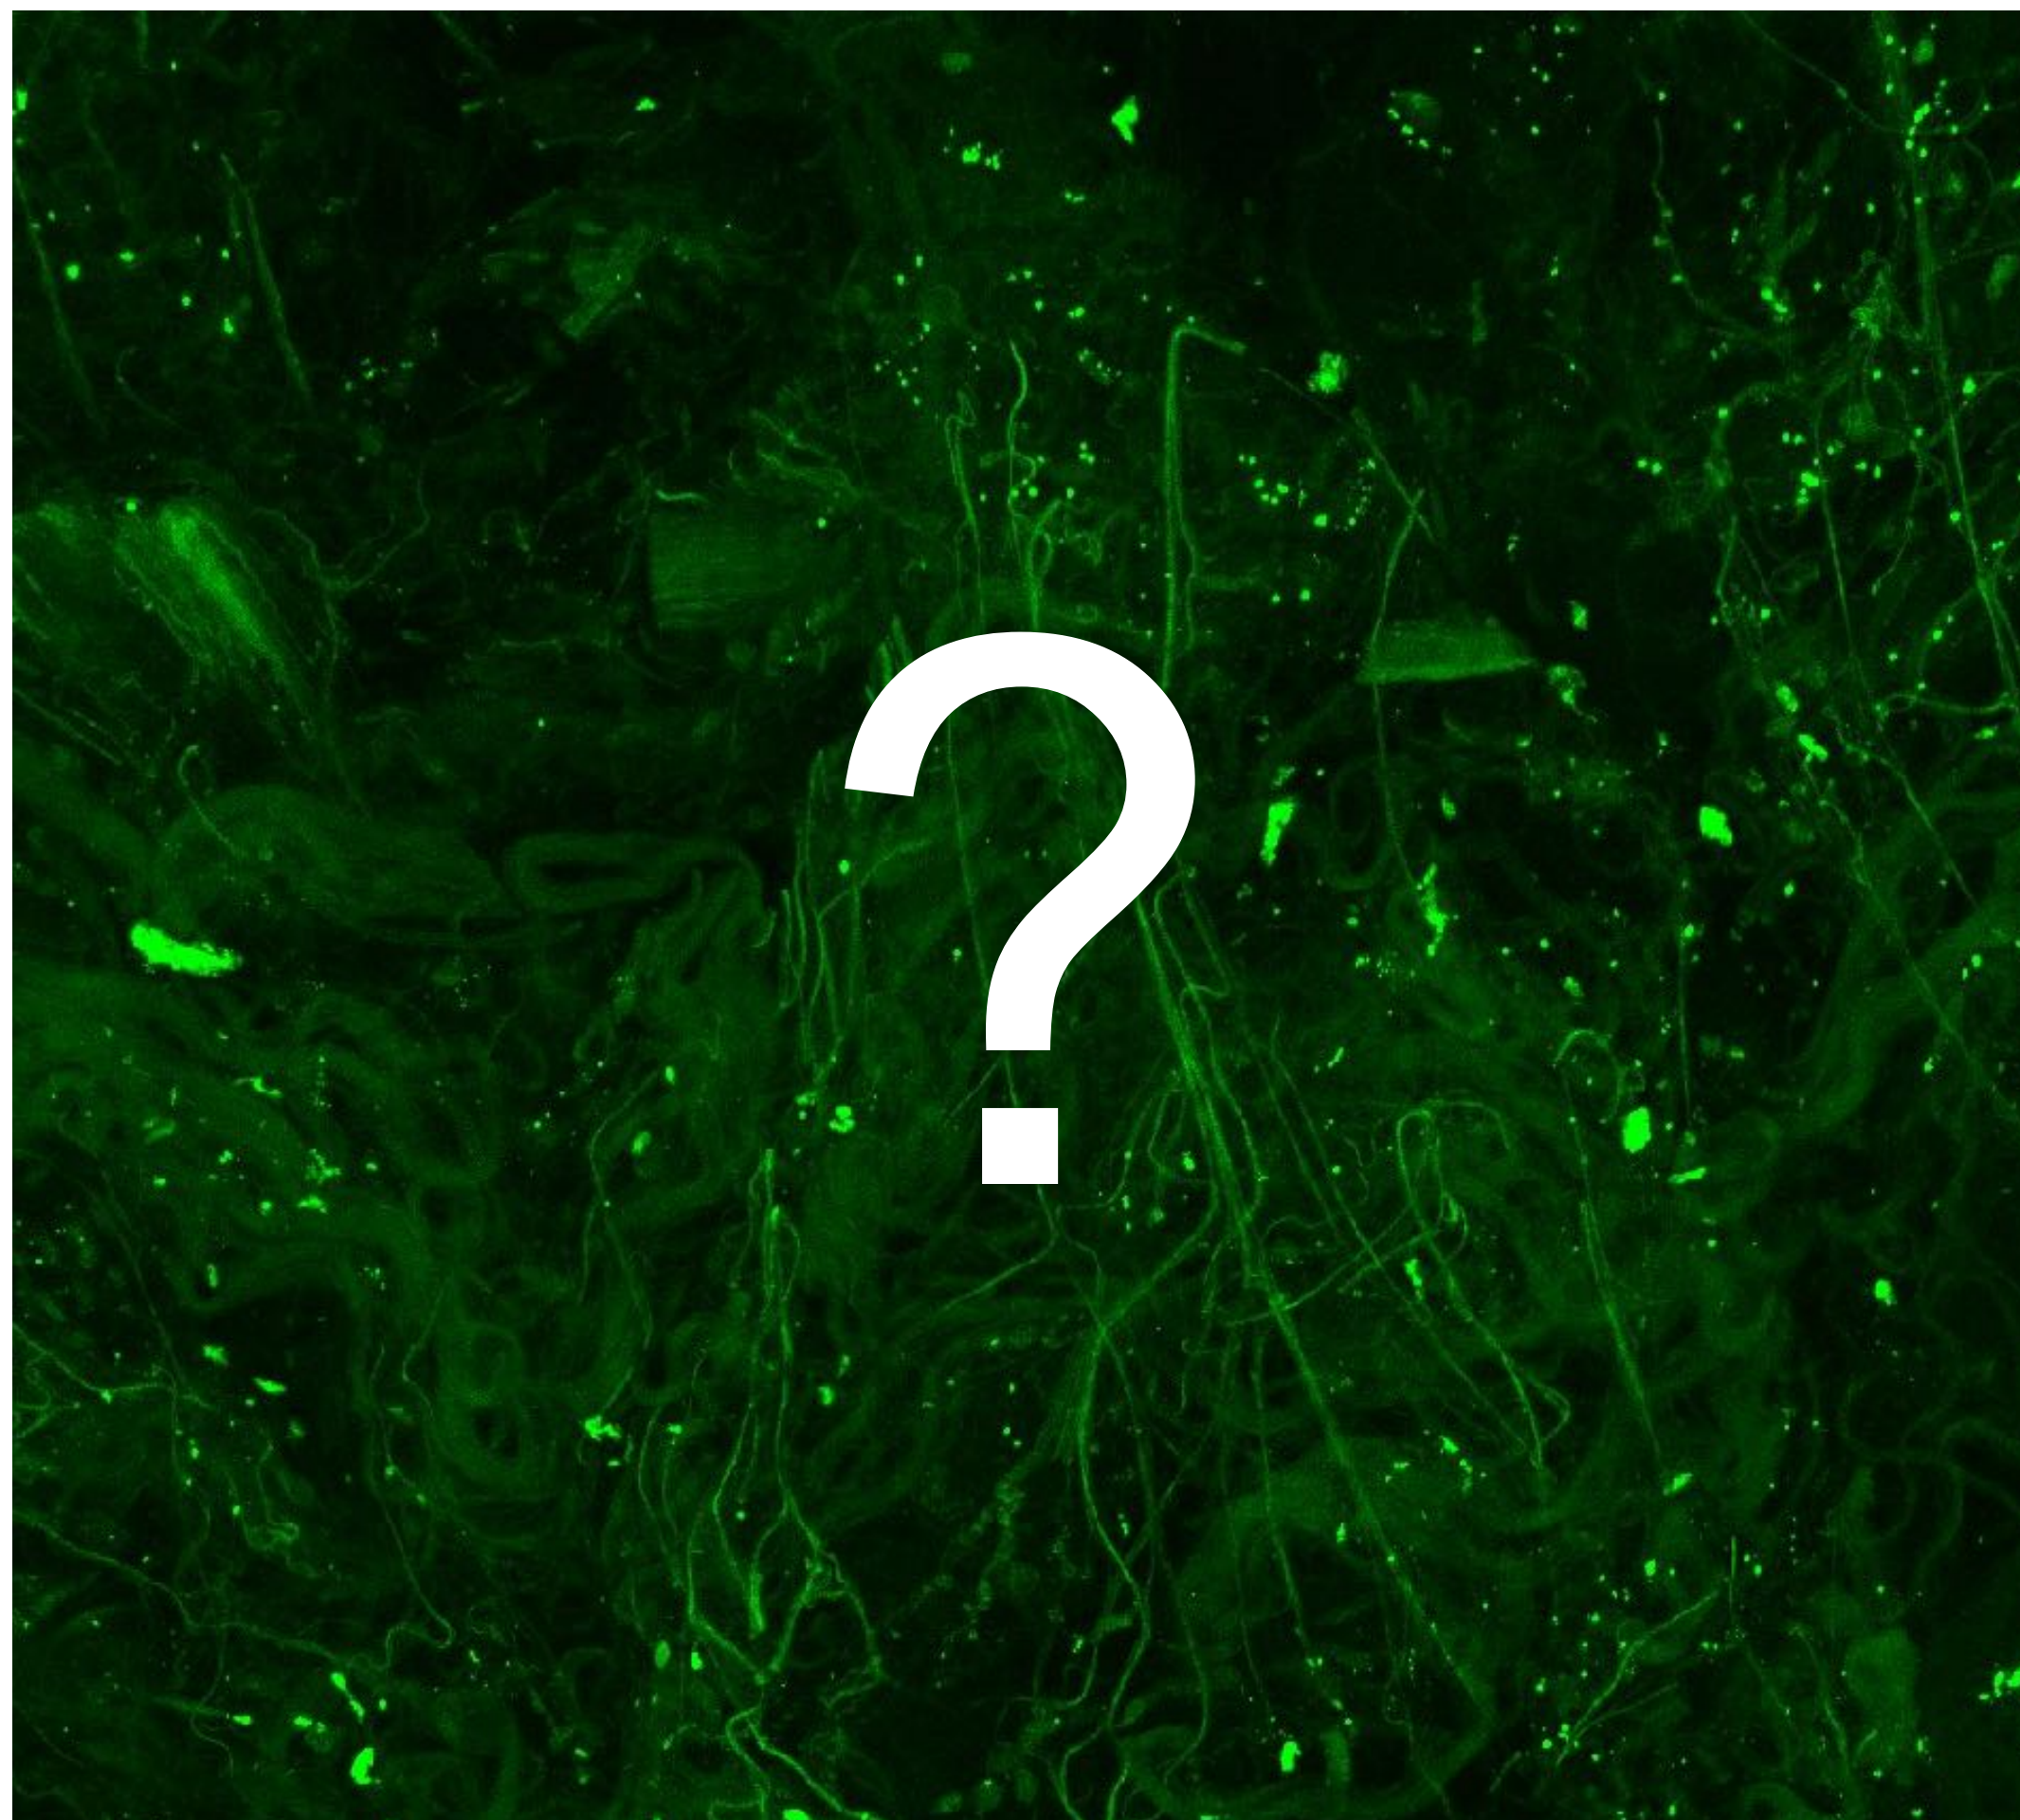

Tumor

Margin



4341

# Overview

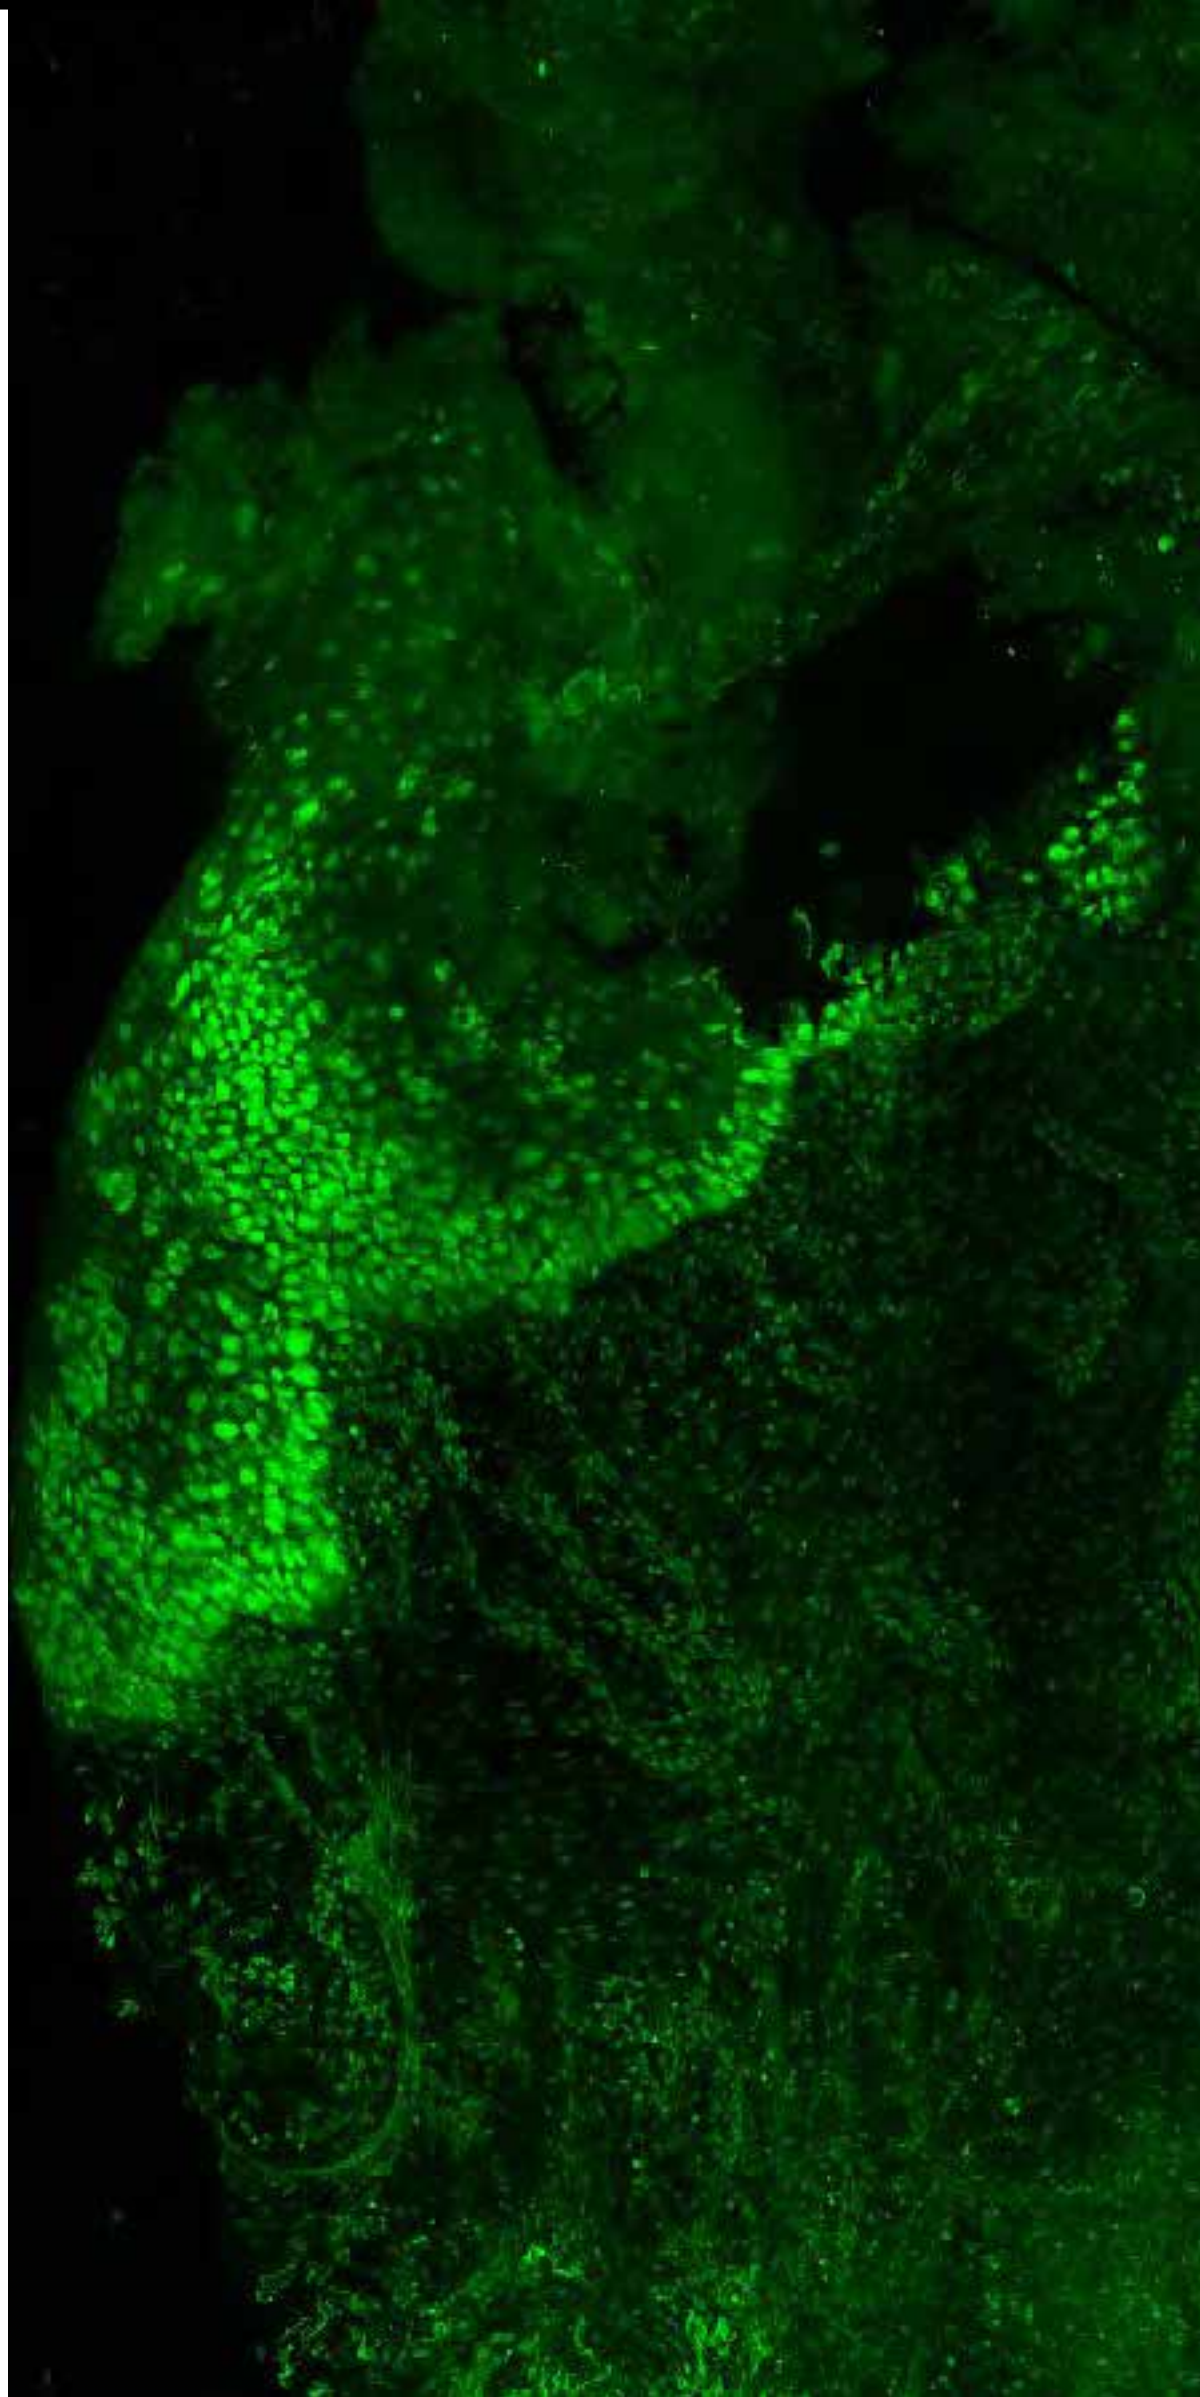

PARPi-FL only (green)

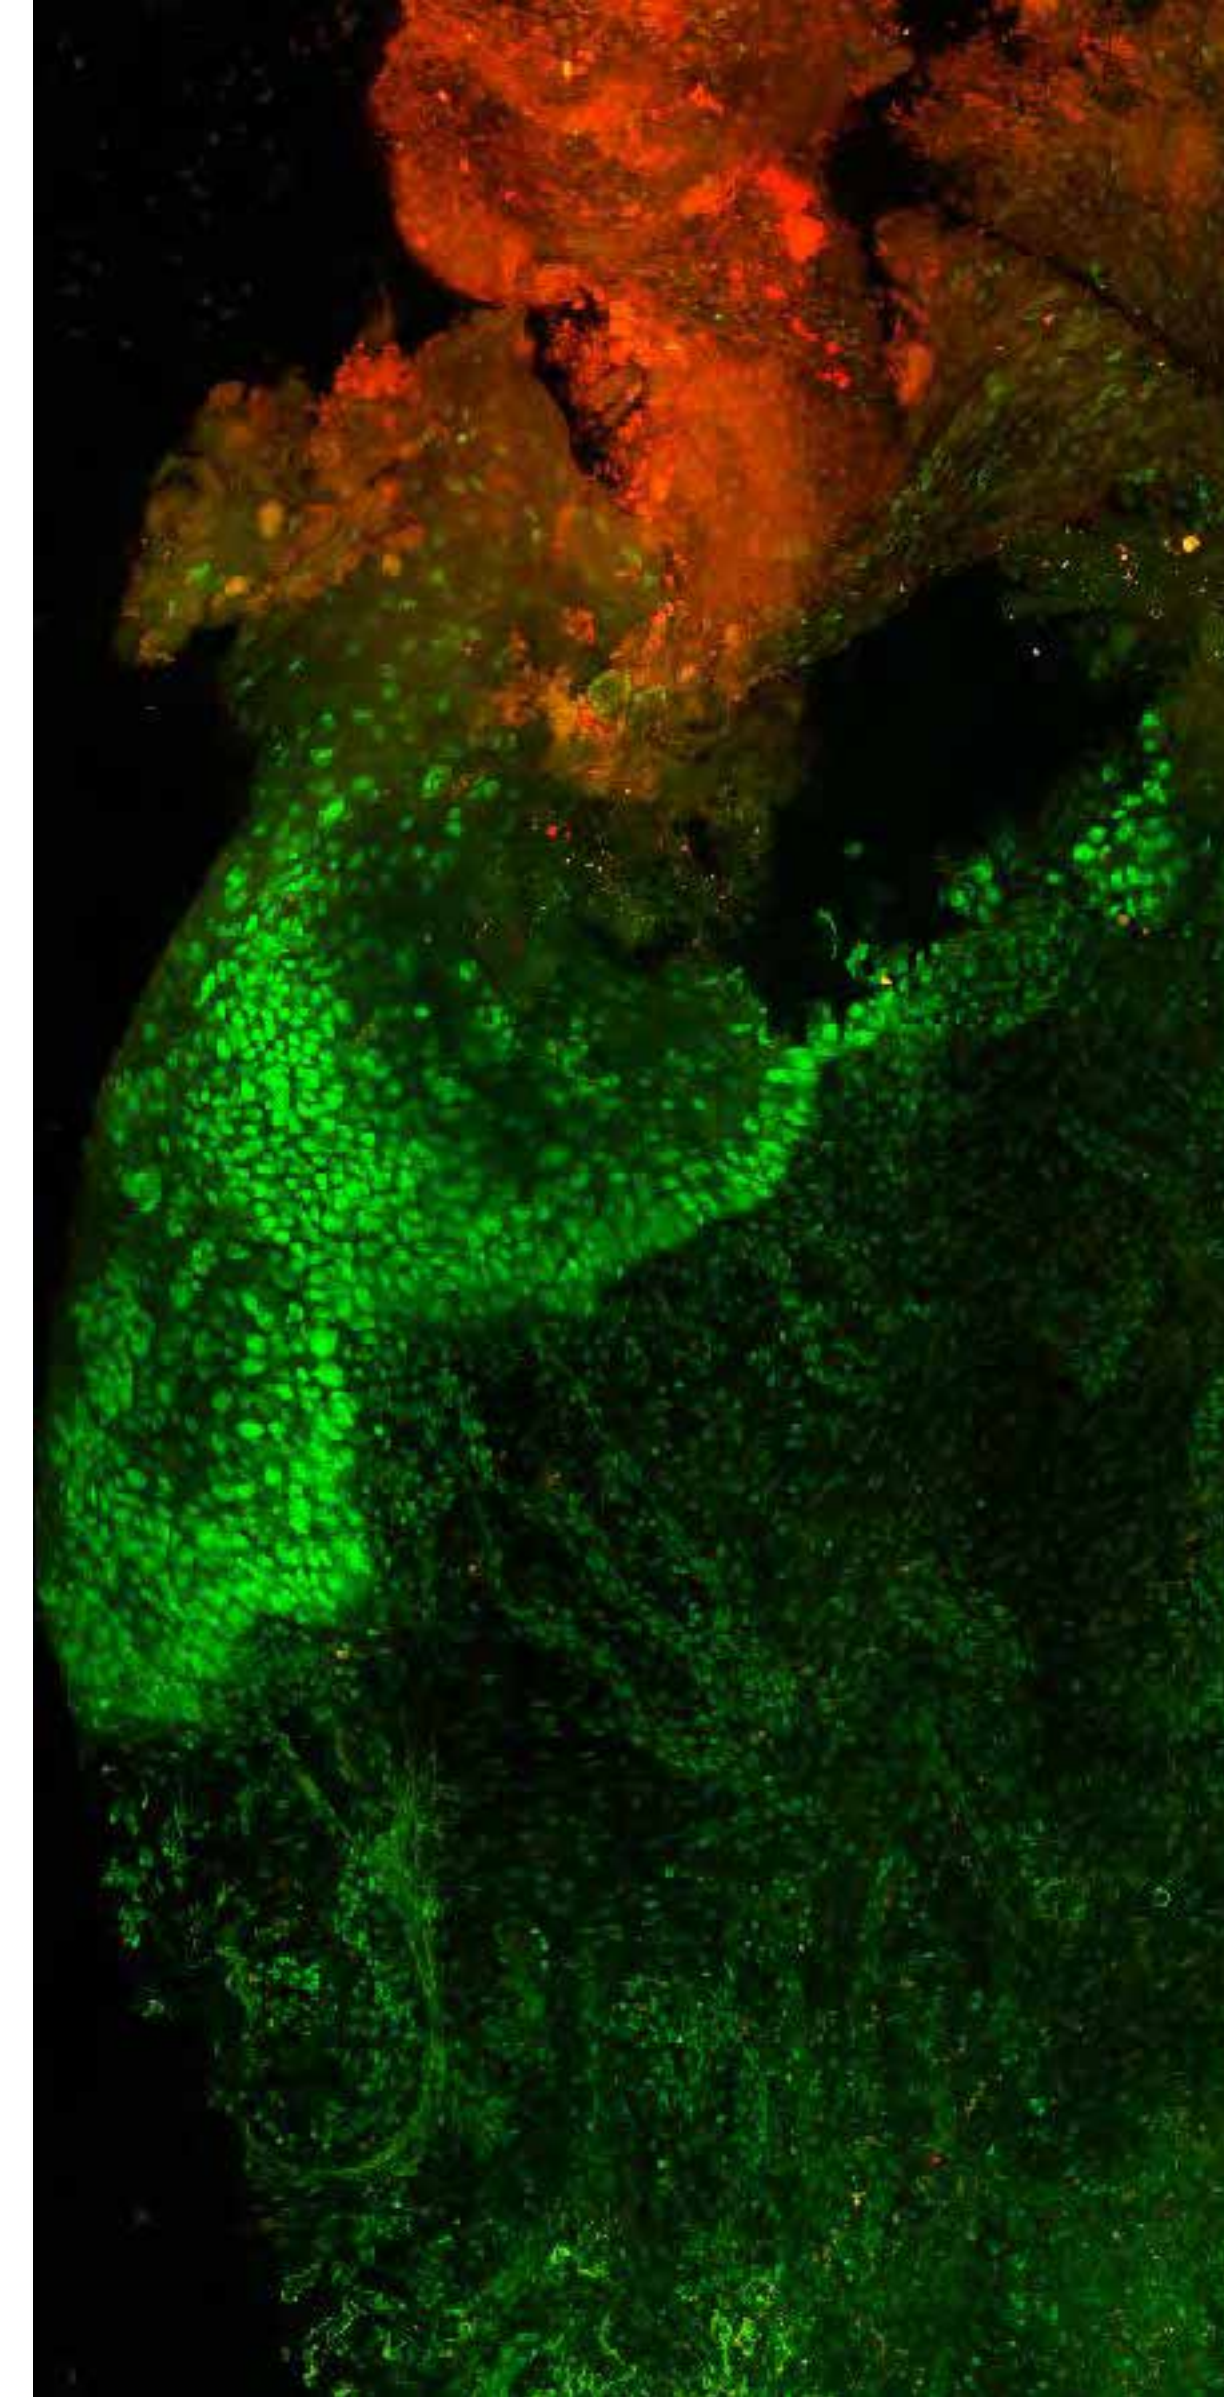

PARPi-FL (green) + Autofluorescence (red/yellow)



4341

Close-up

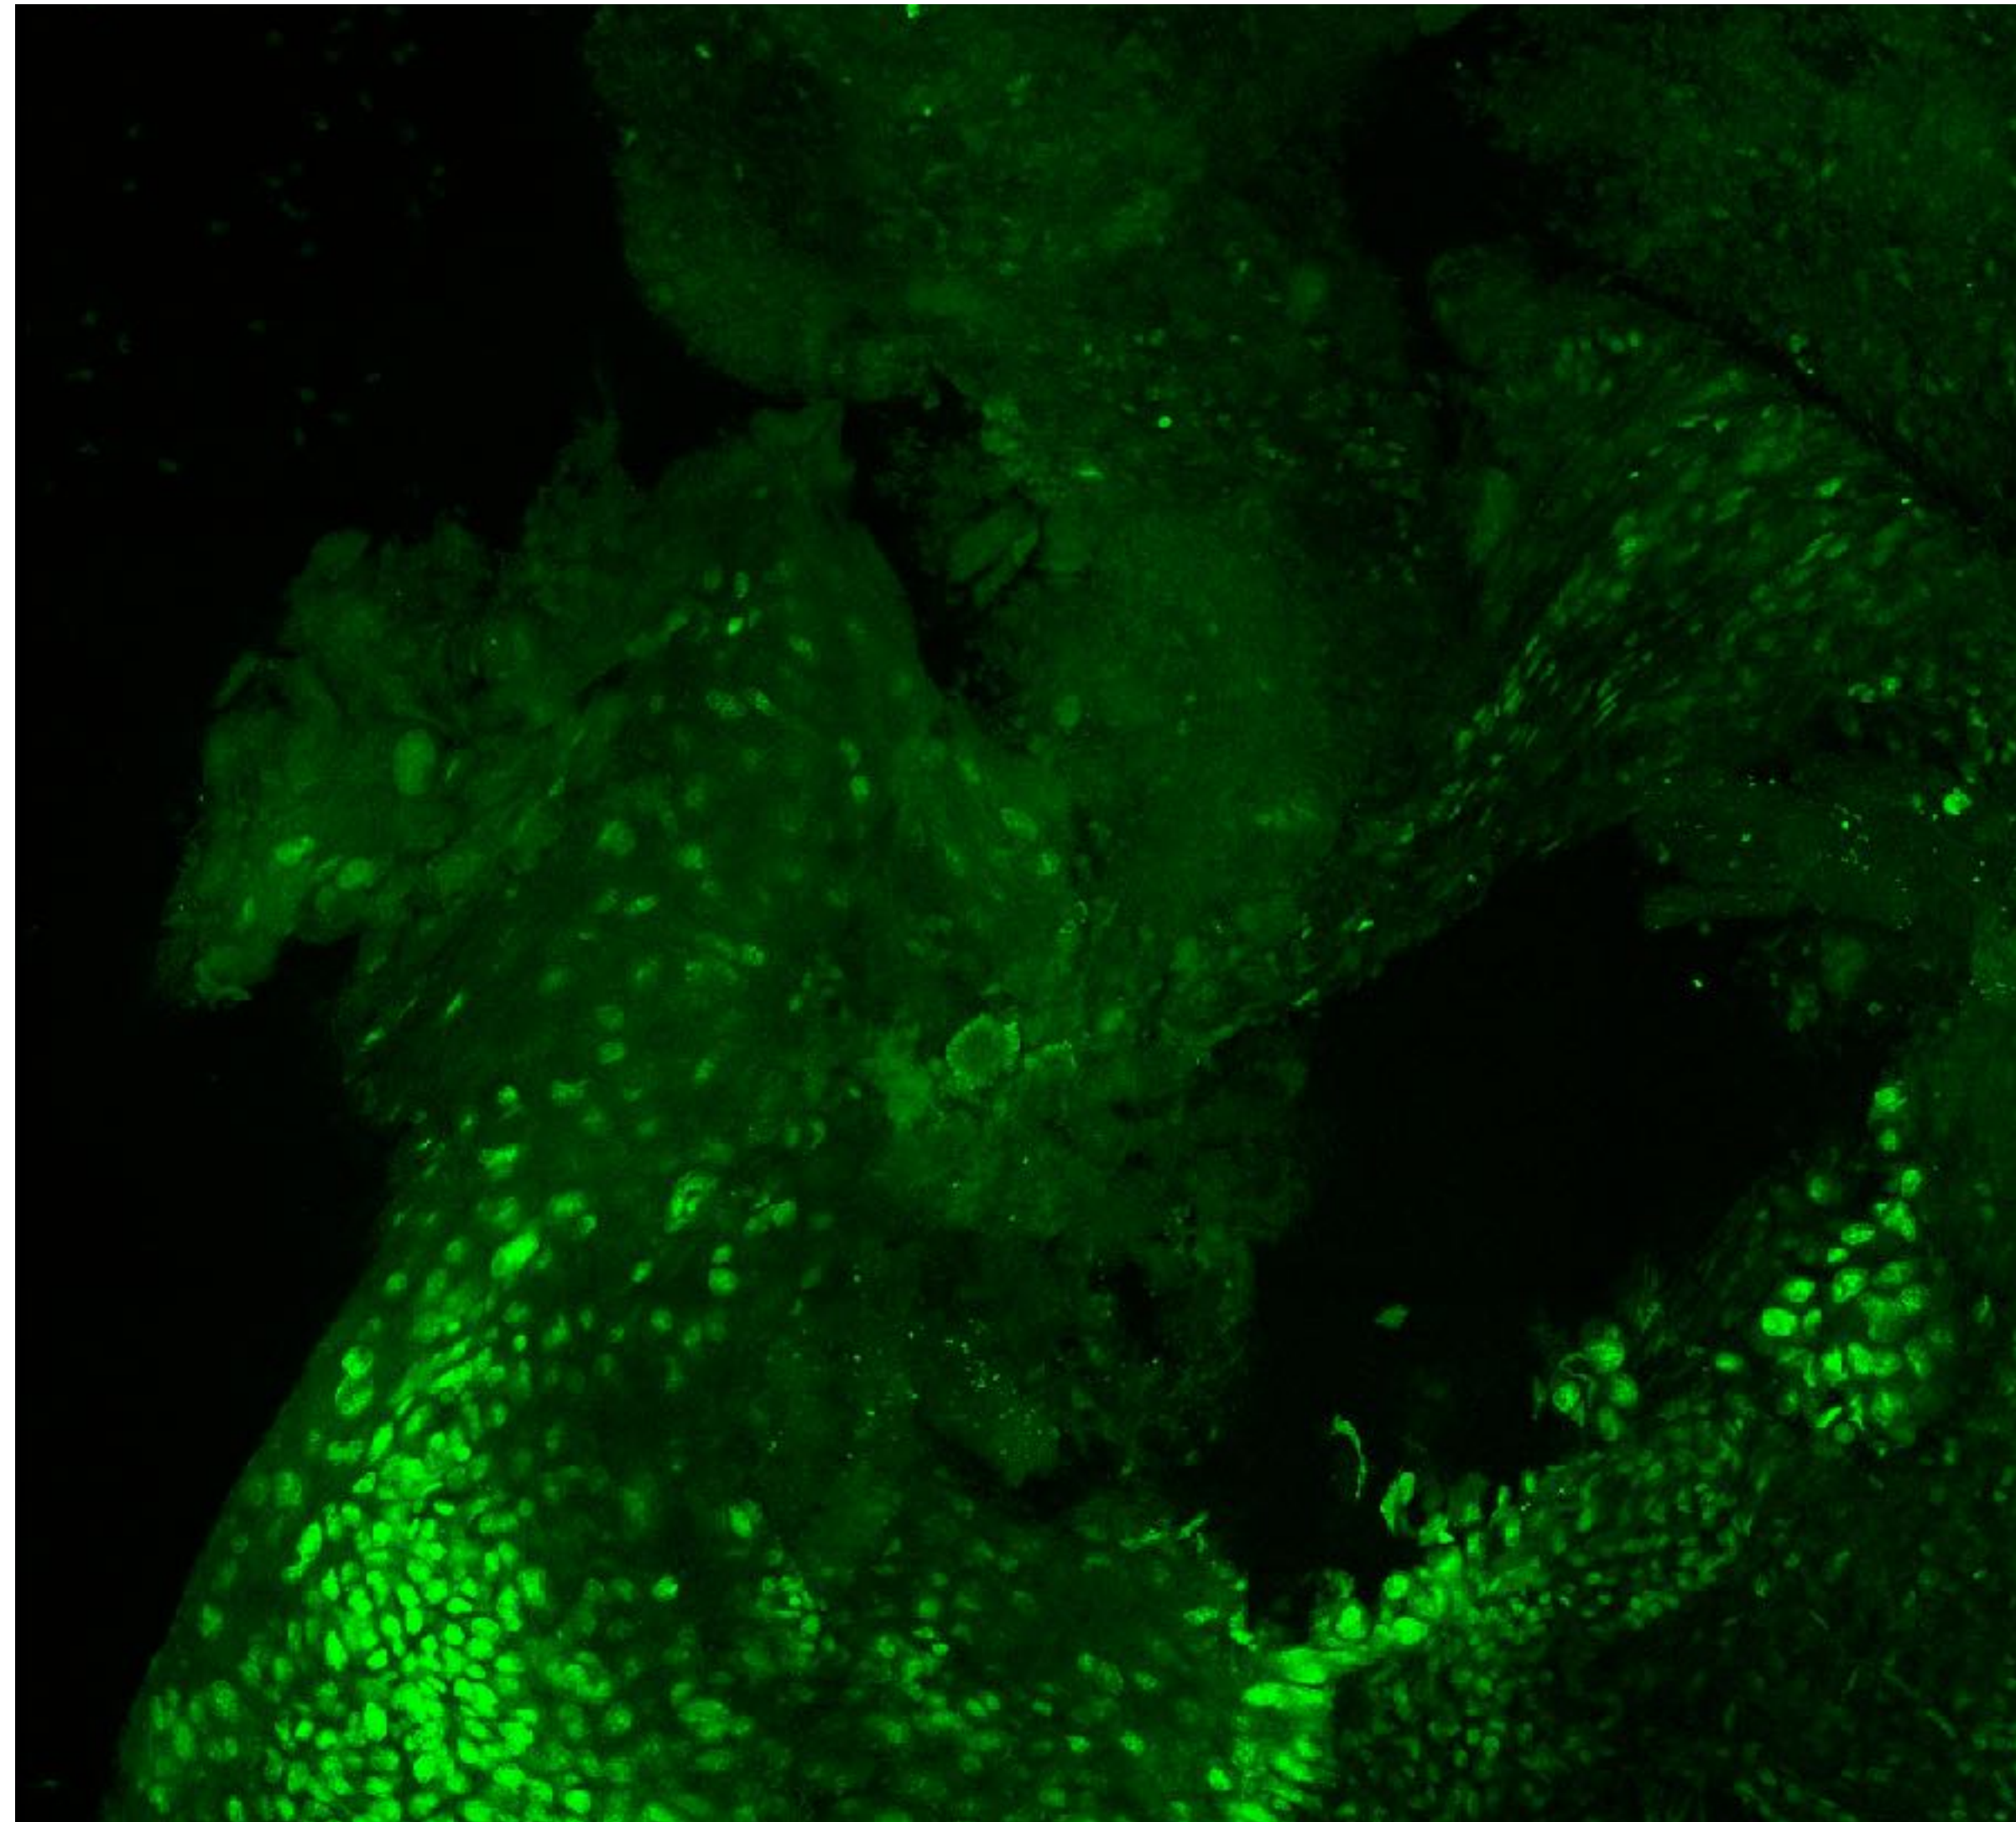

PARPi-FL only (green)

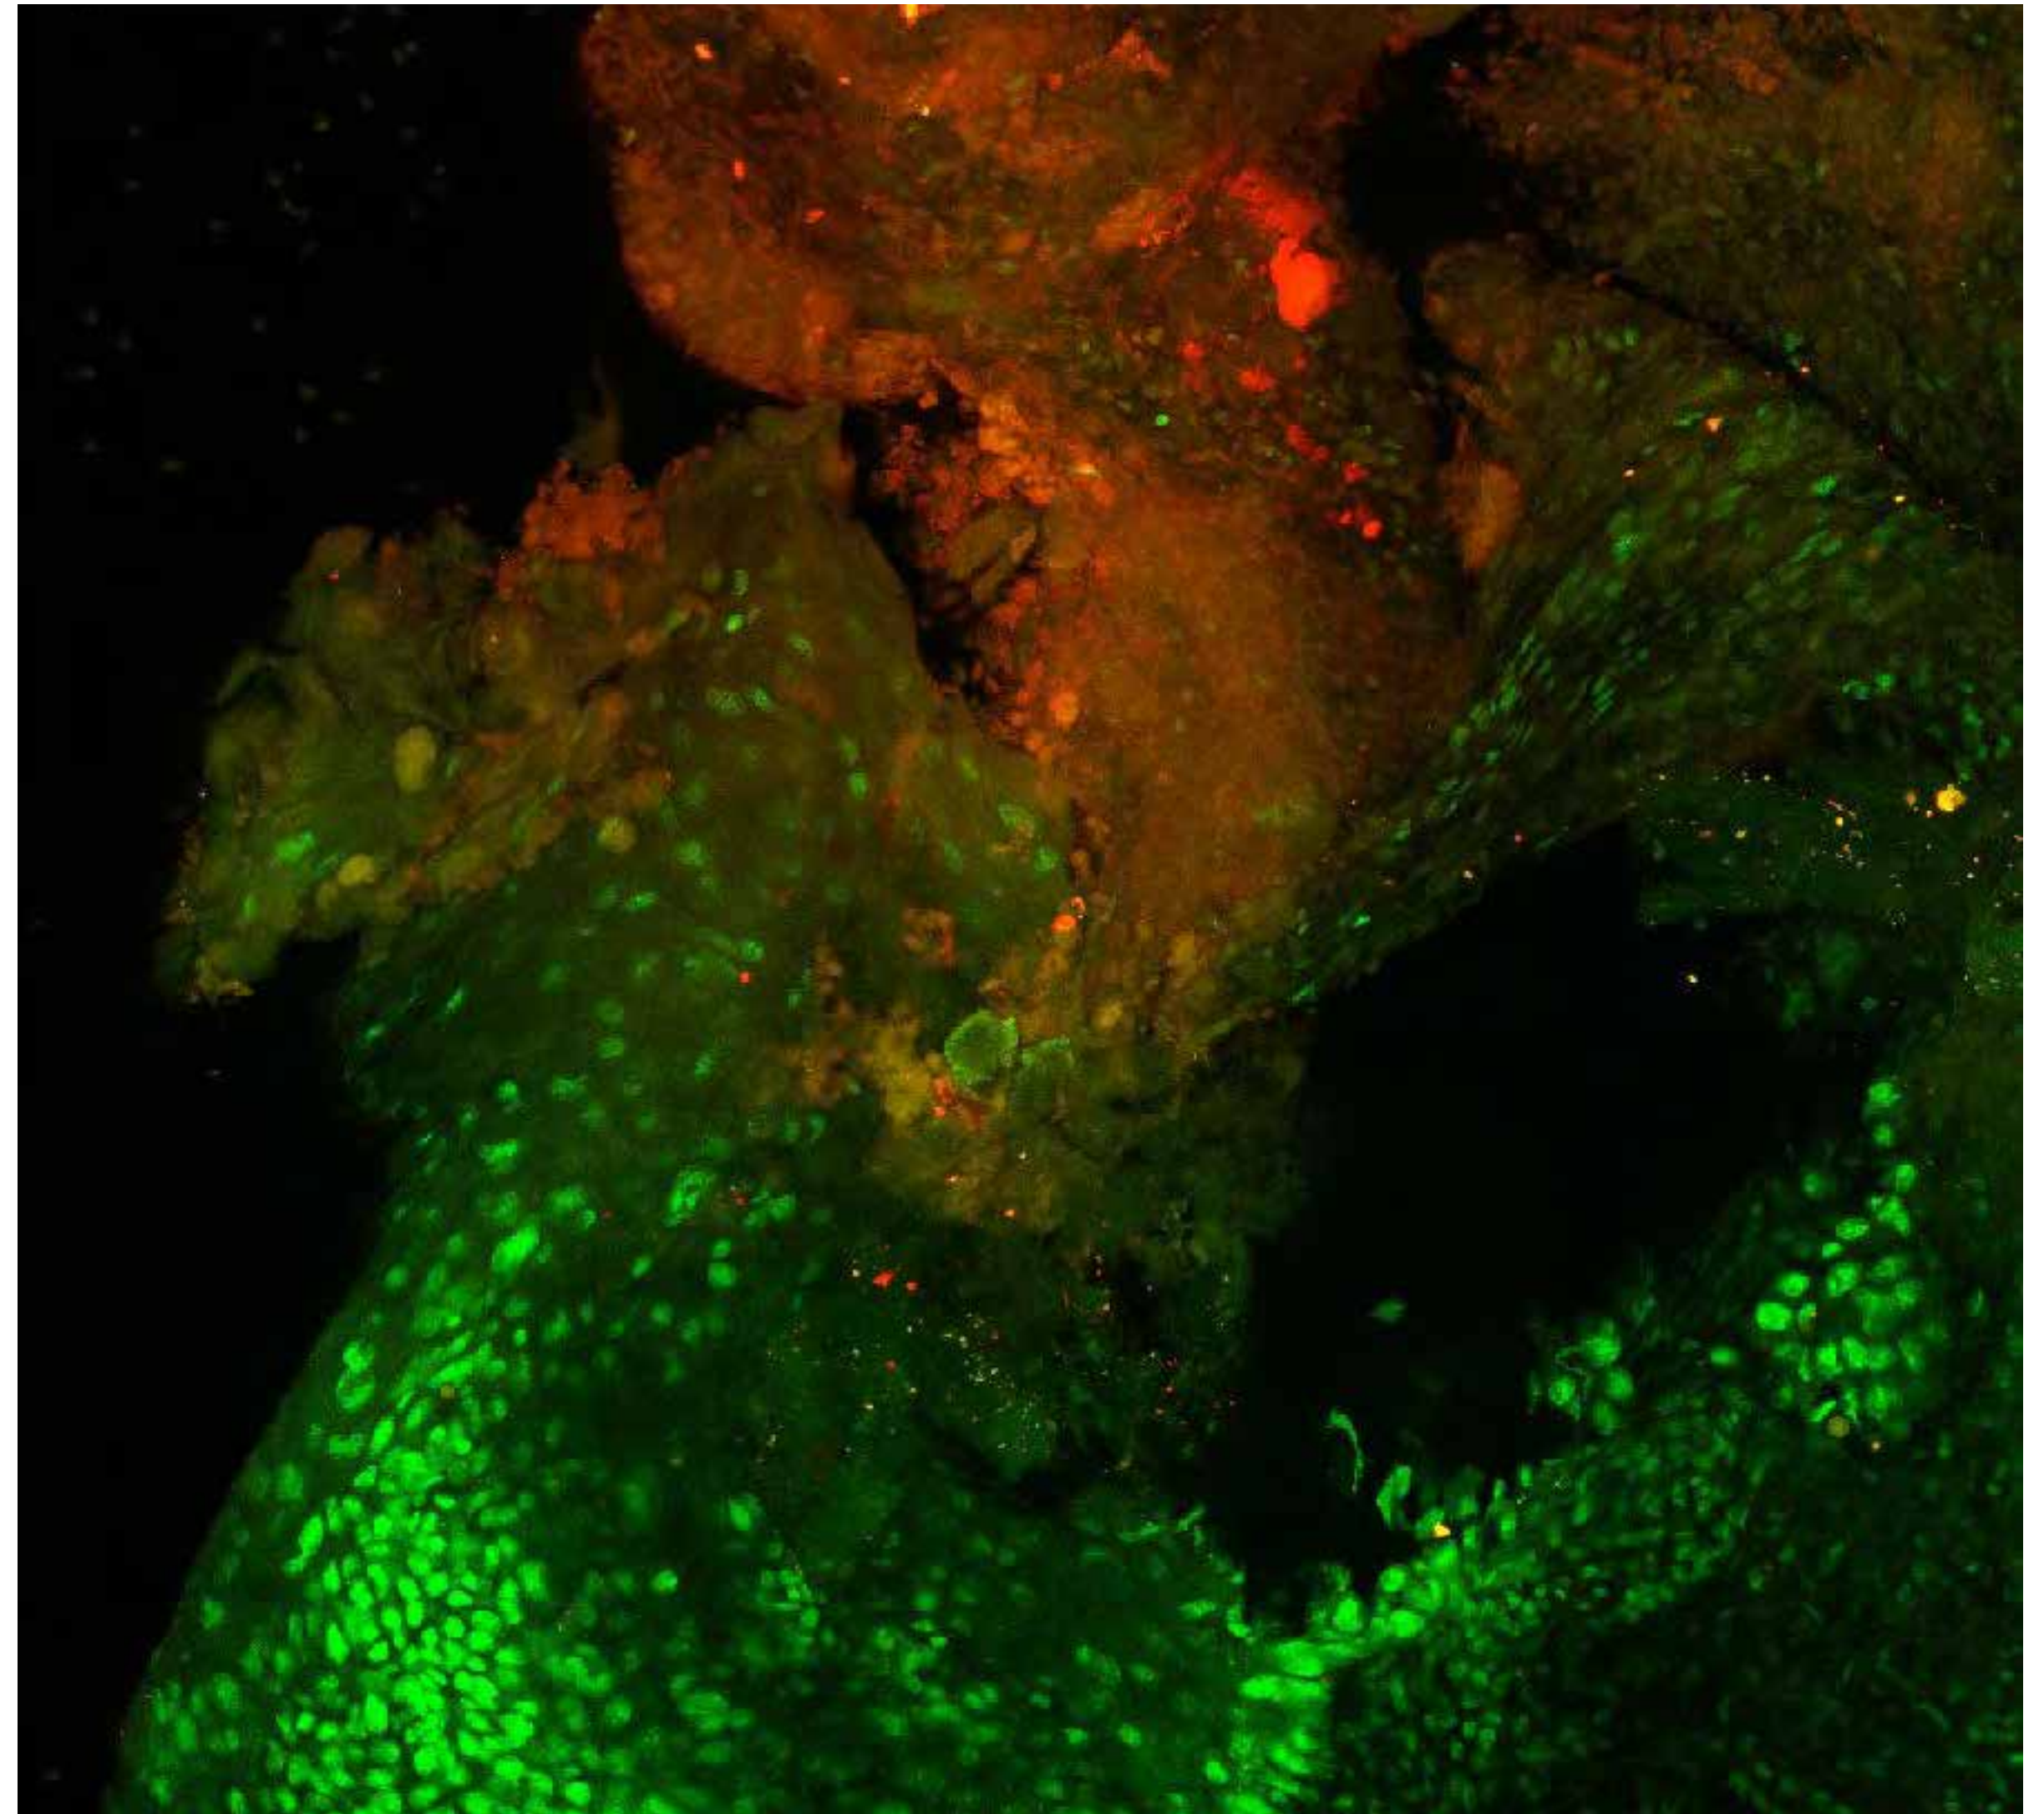

PARPi-FL (green) + Autofluorescence (red/yellow)



4341

Close-up

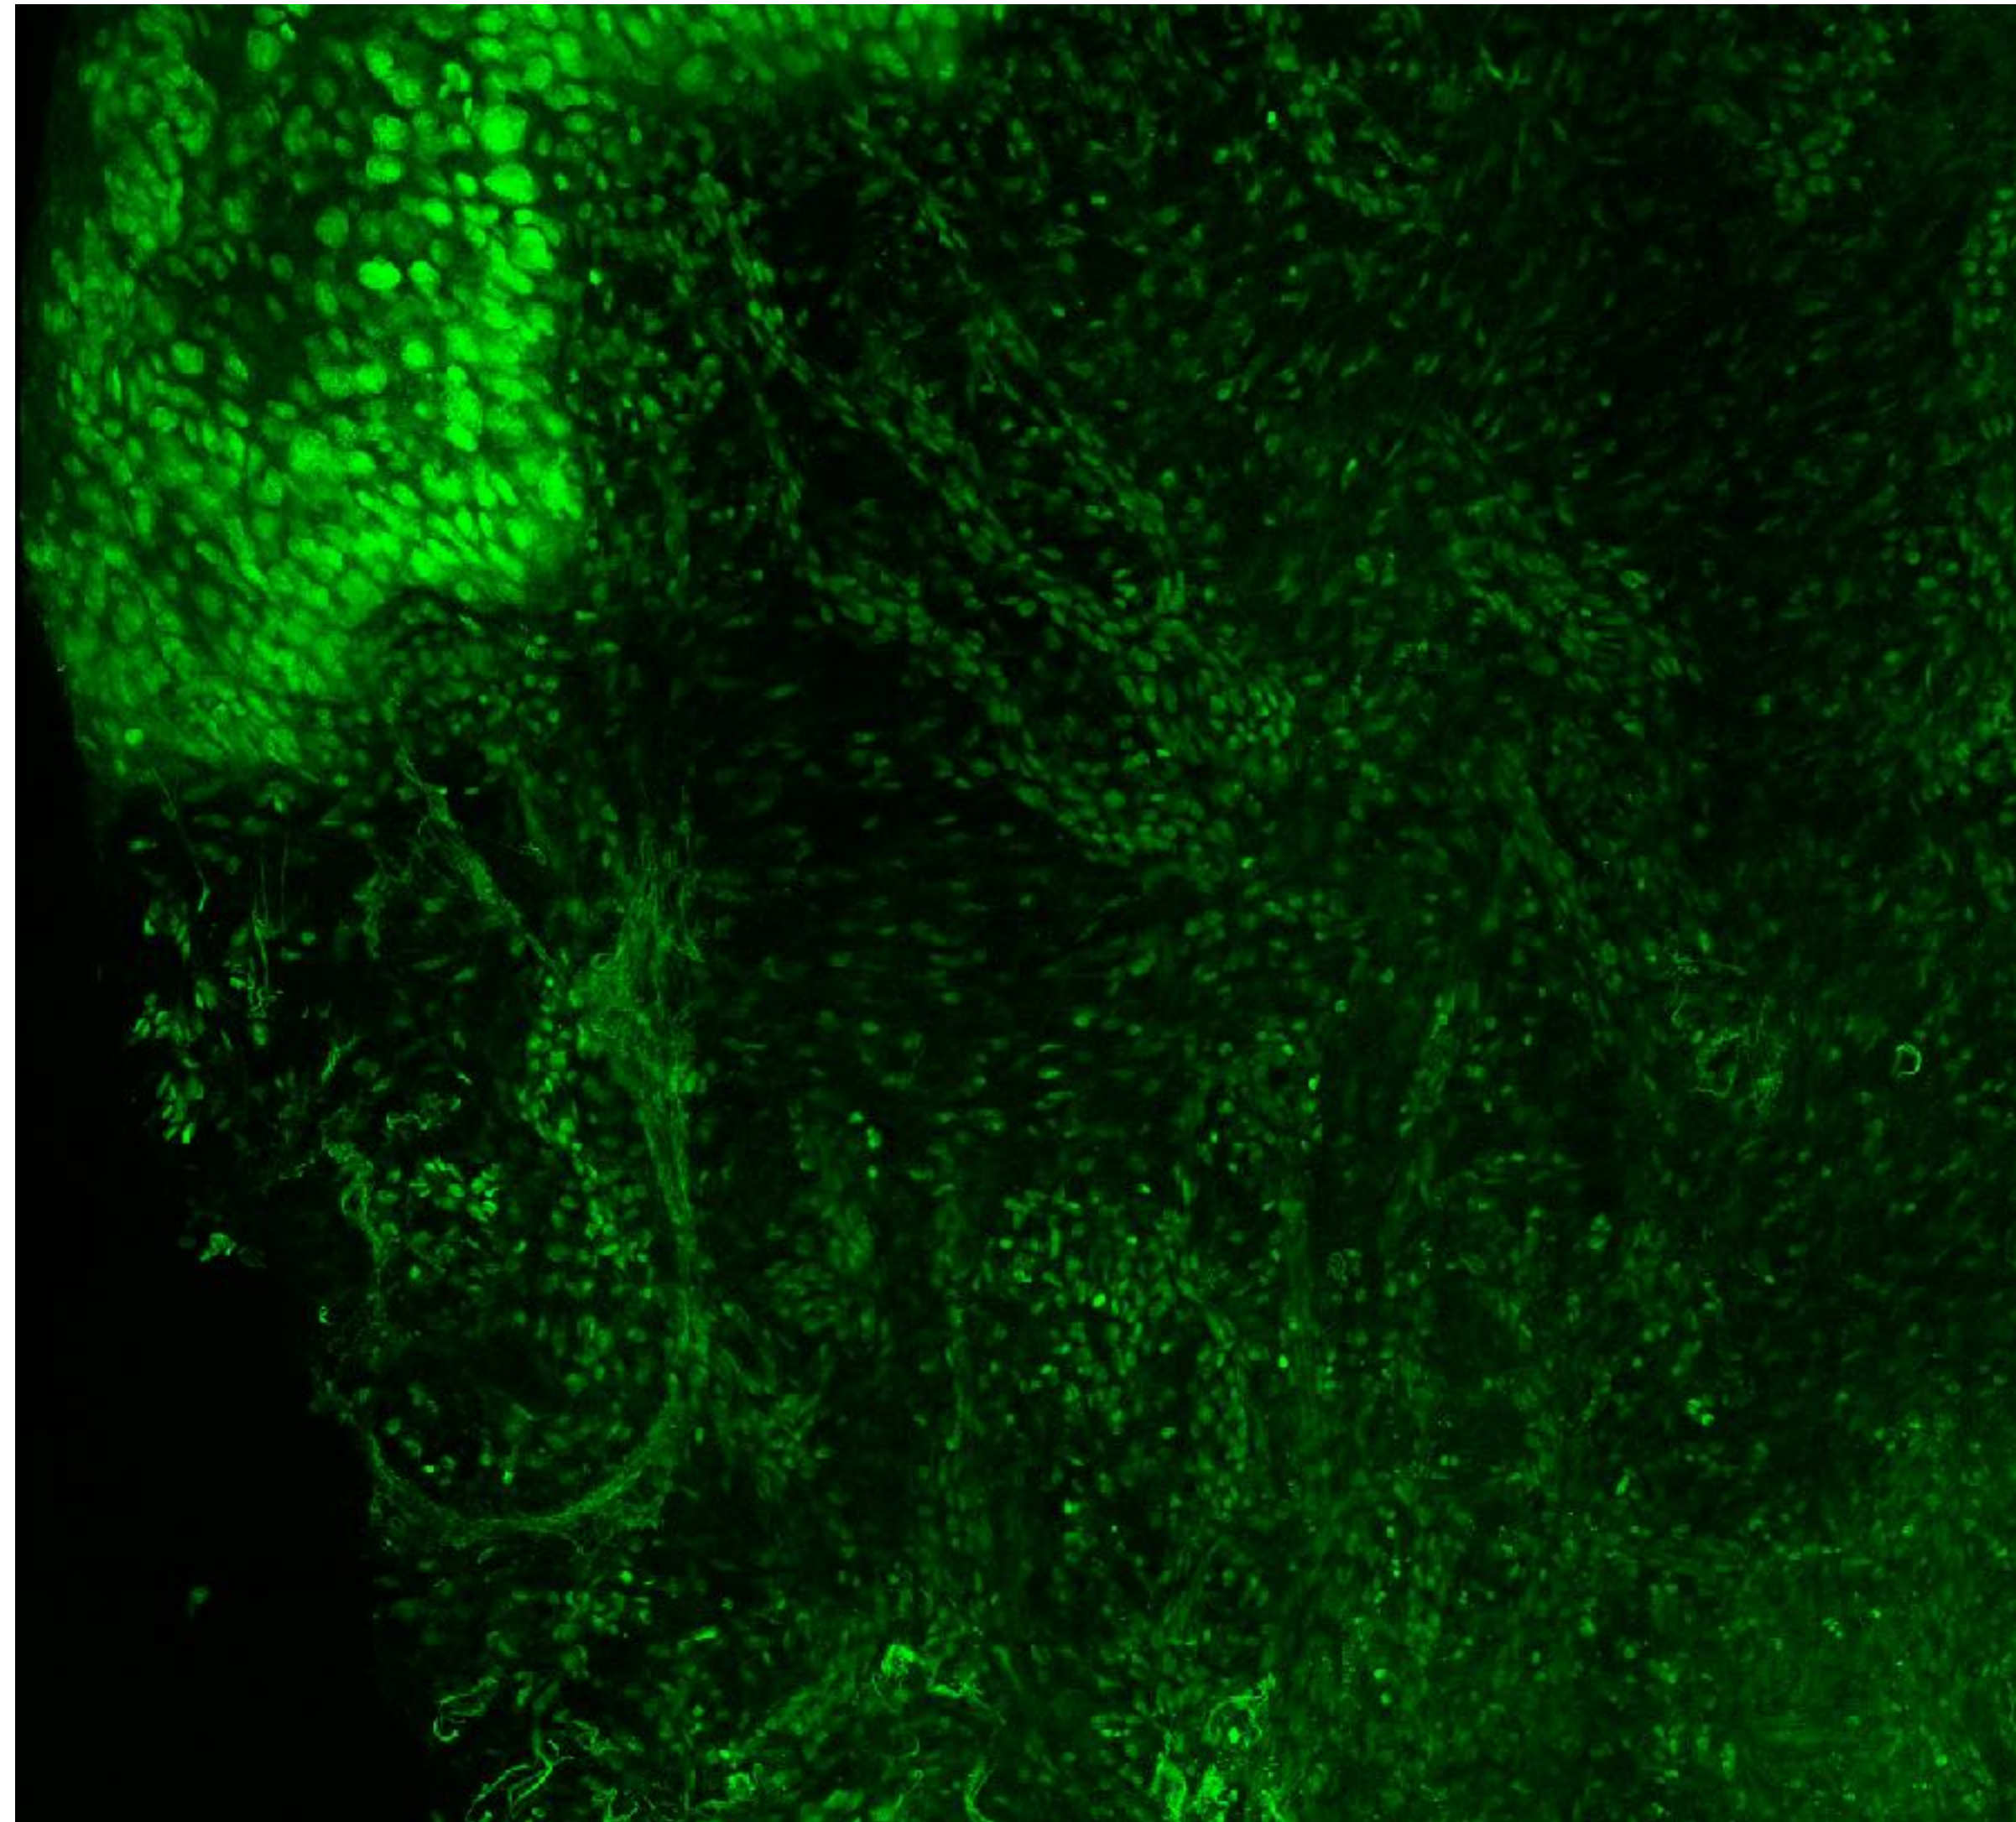

PARPi-FL only (green)

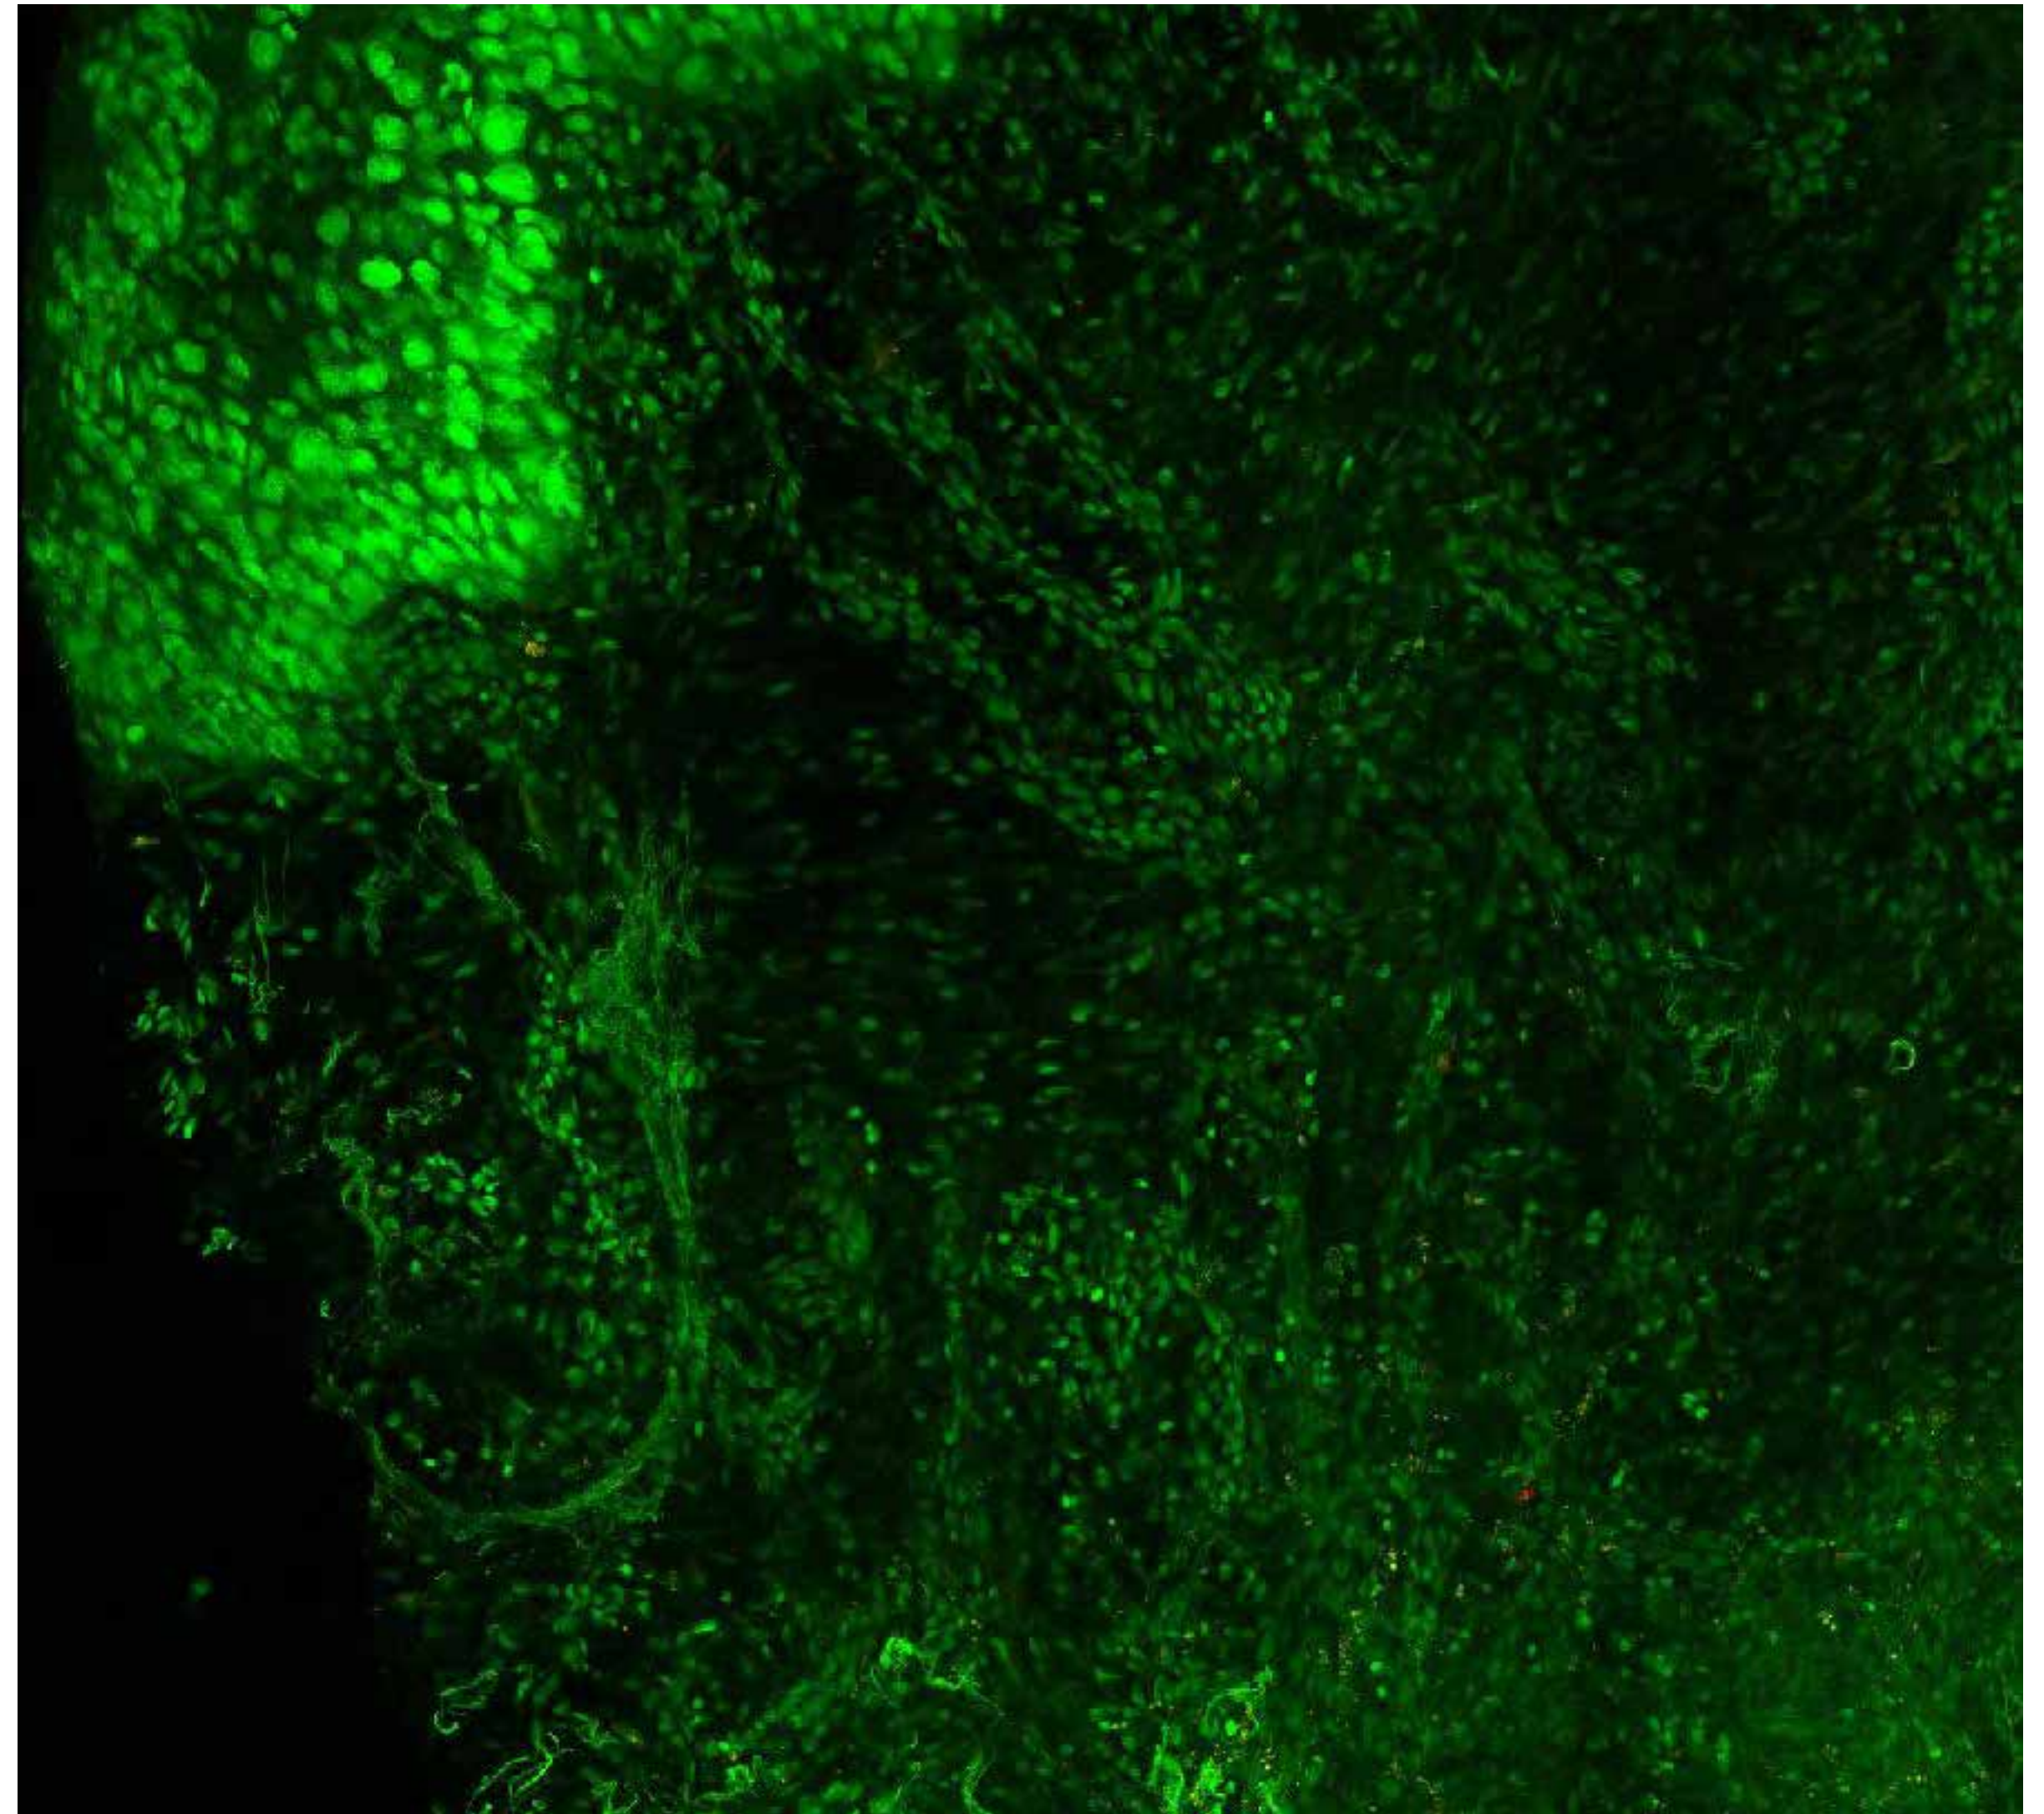

PARPi-FL (green) + Autofluorescence (red/yellow)



4341

Close-up

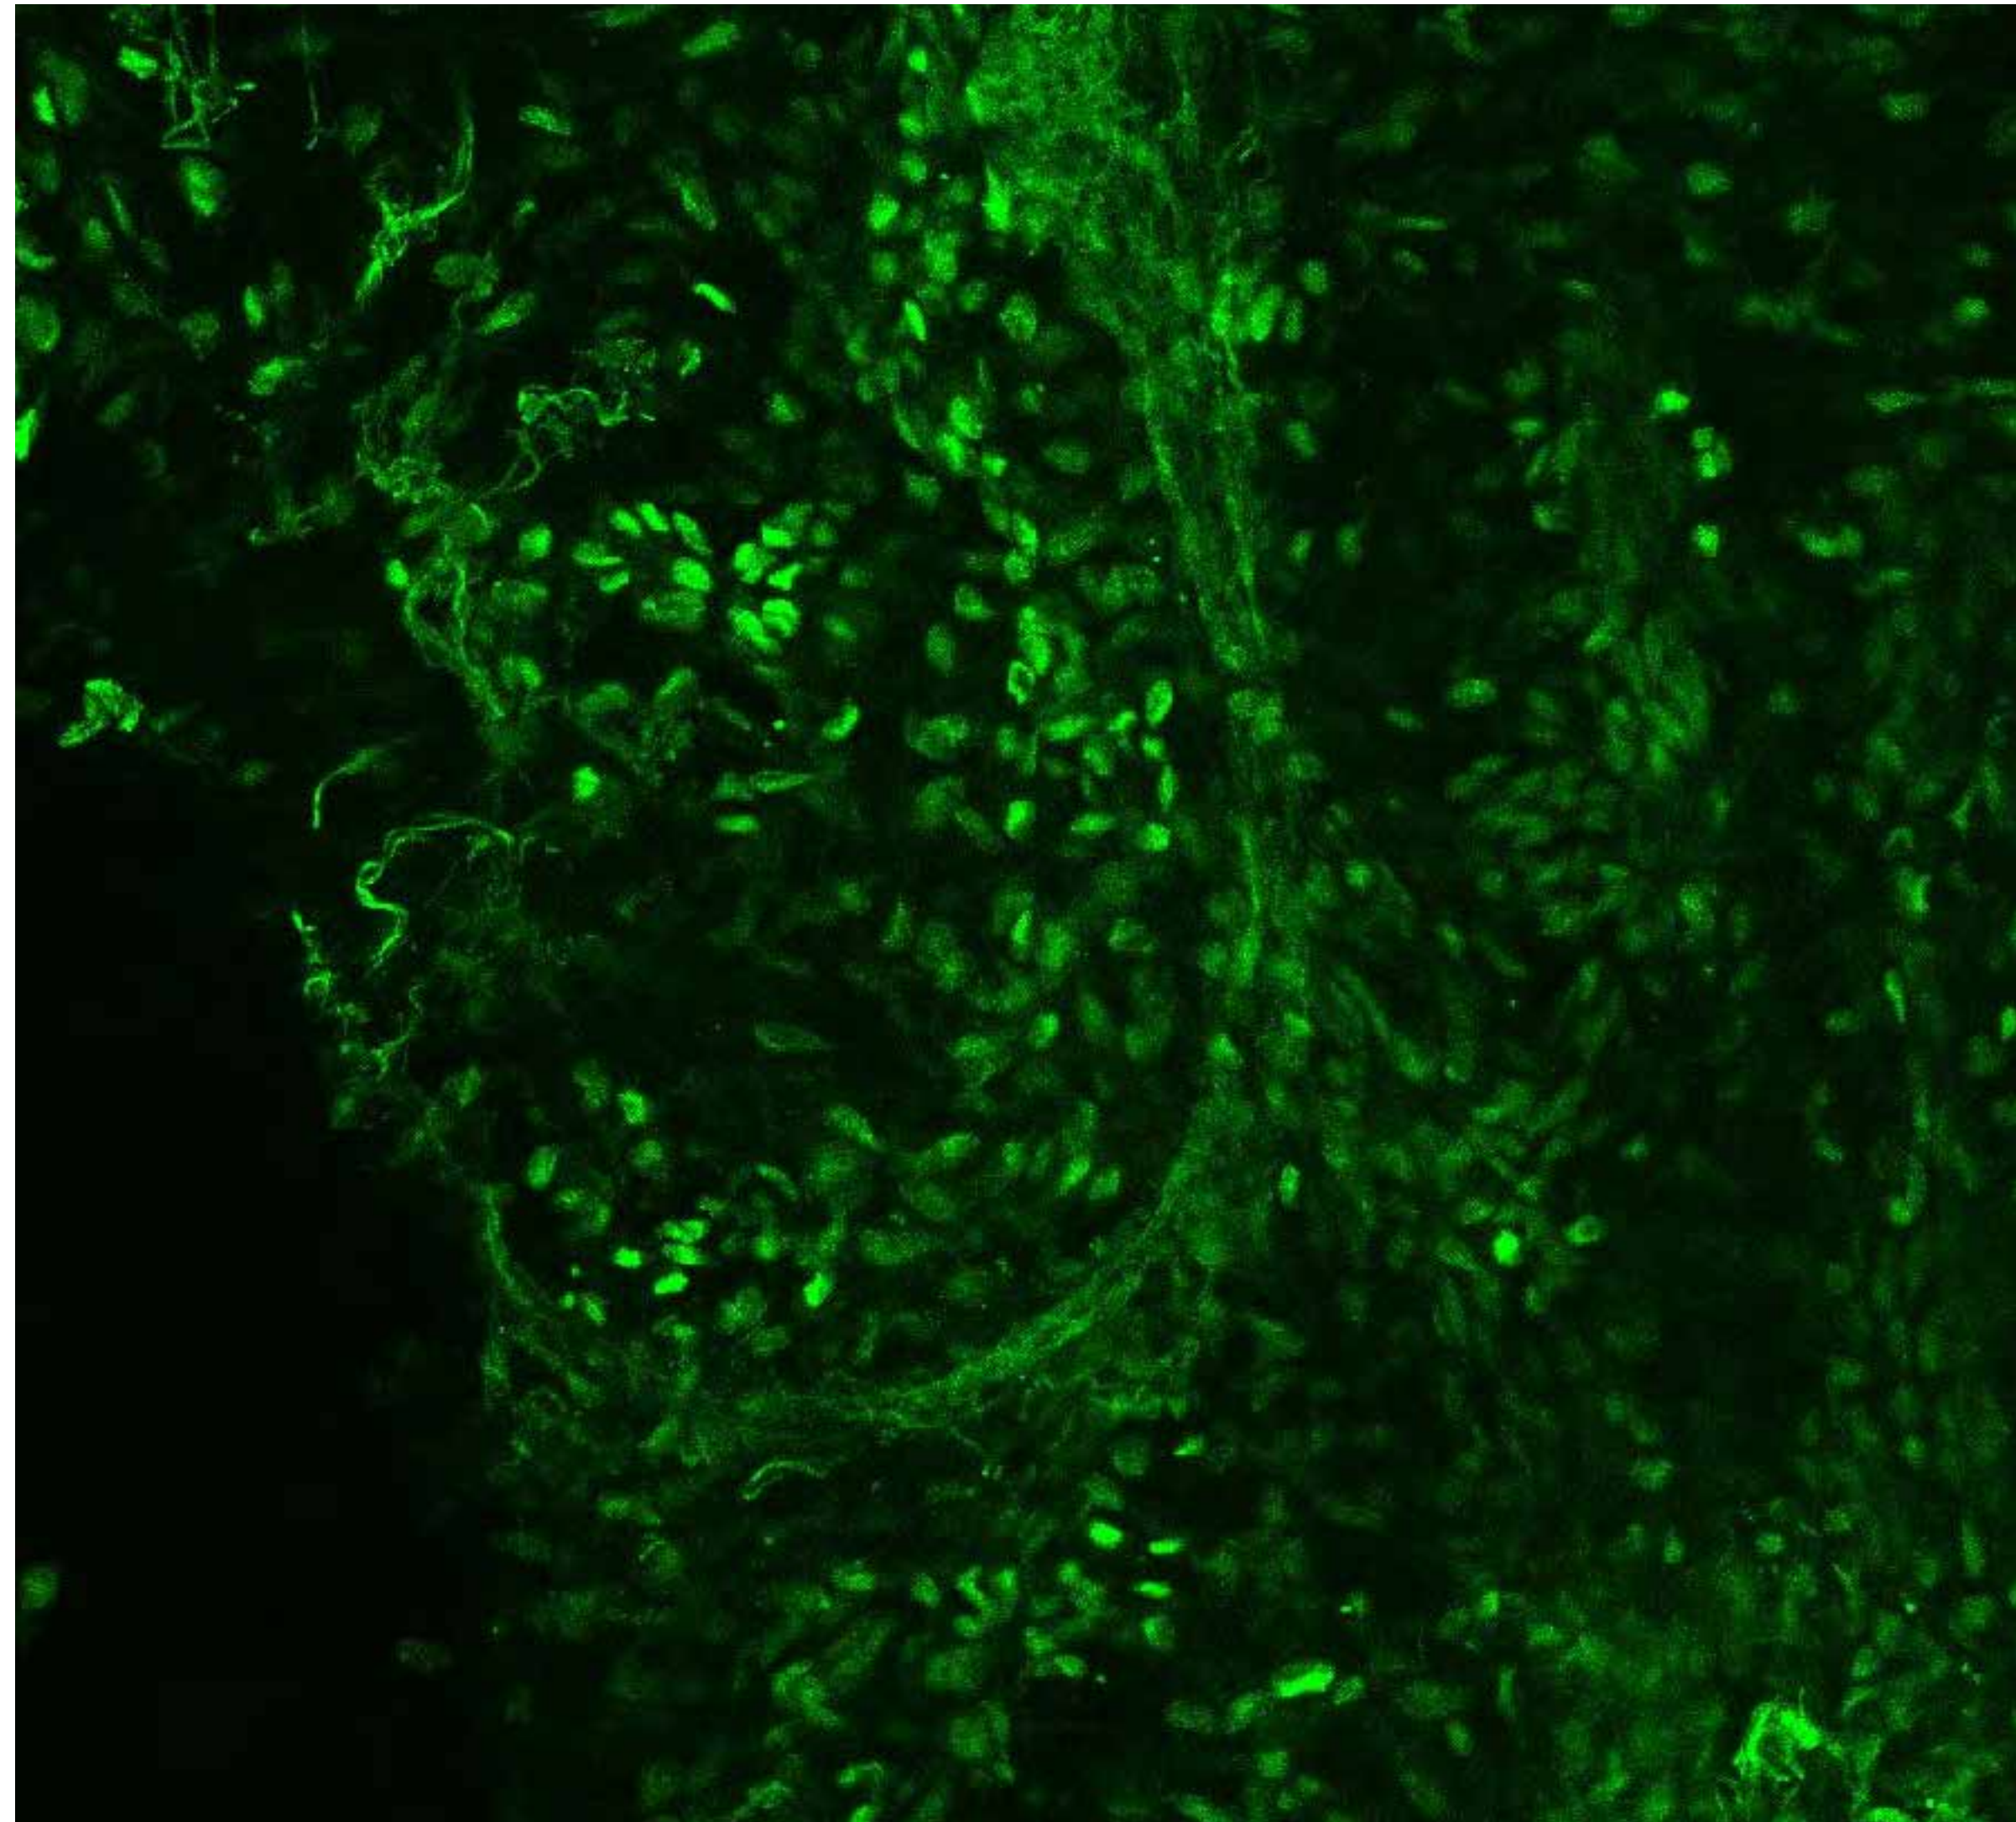

PARPi-FL only (green)

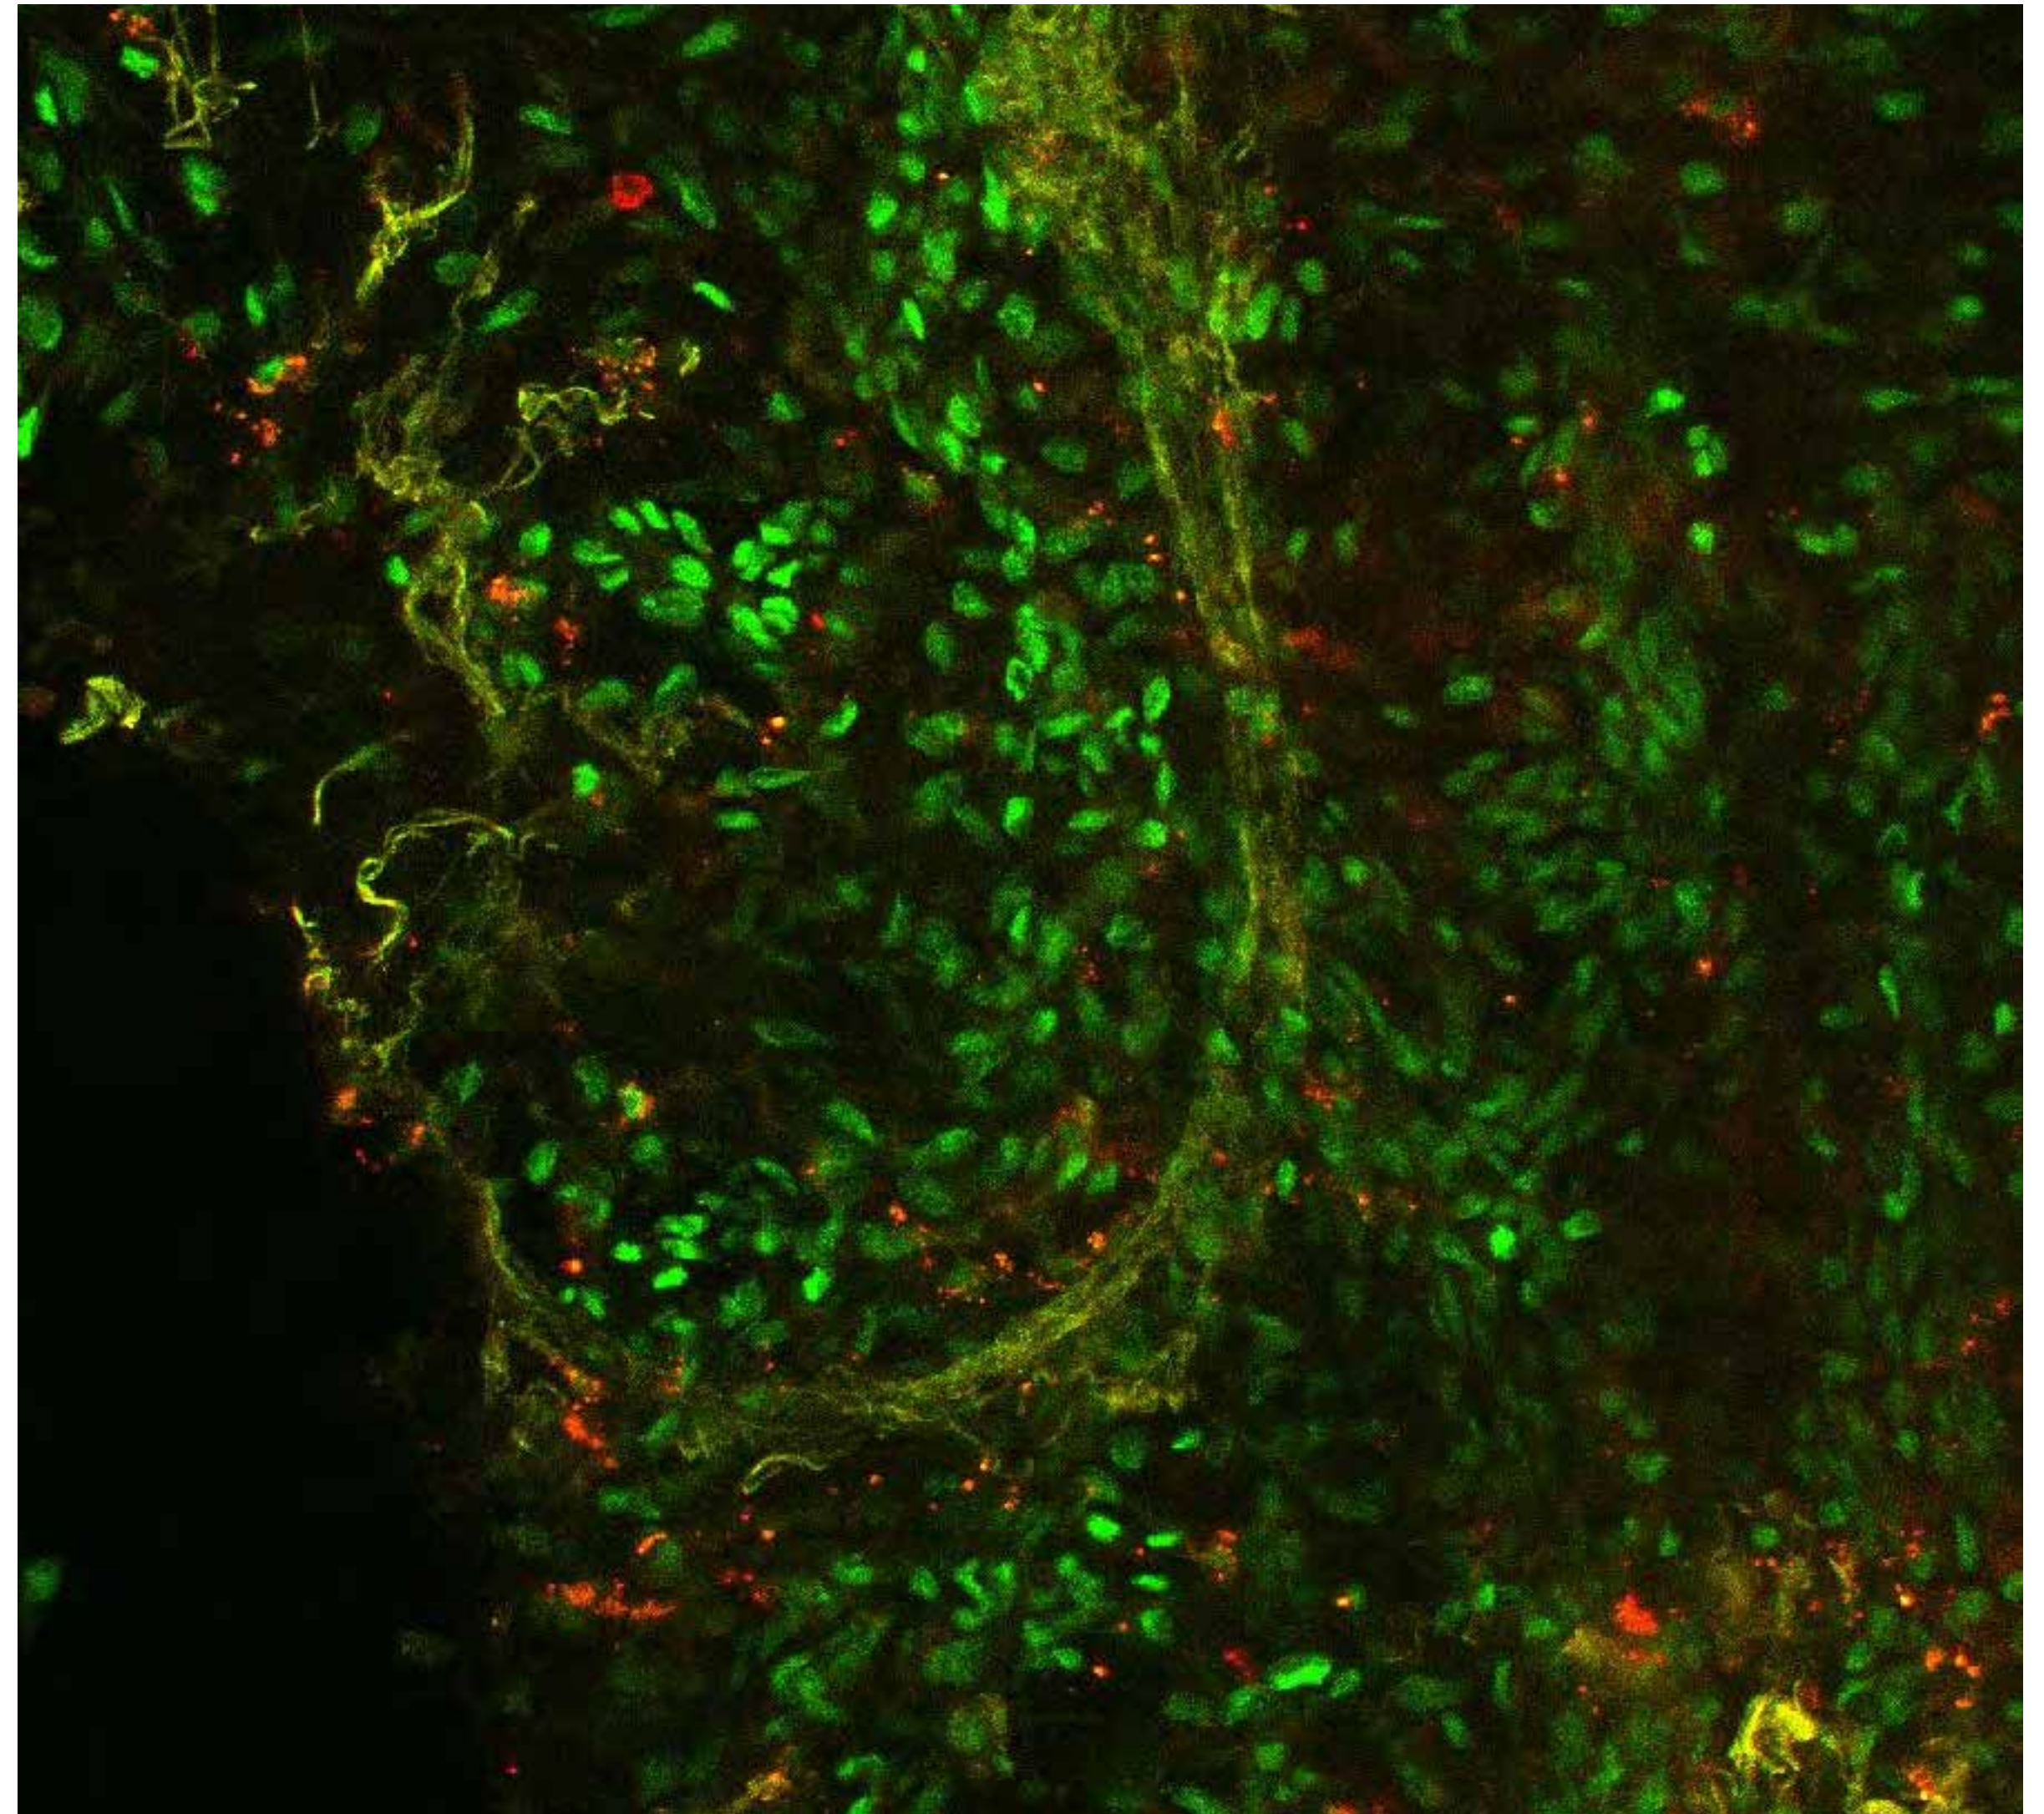

PARPi-FL (green) + Autofluorescence (red/yellow)



4341

10

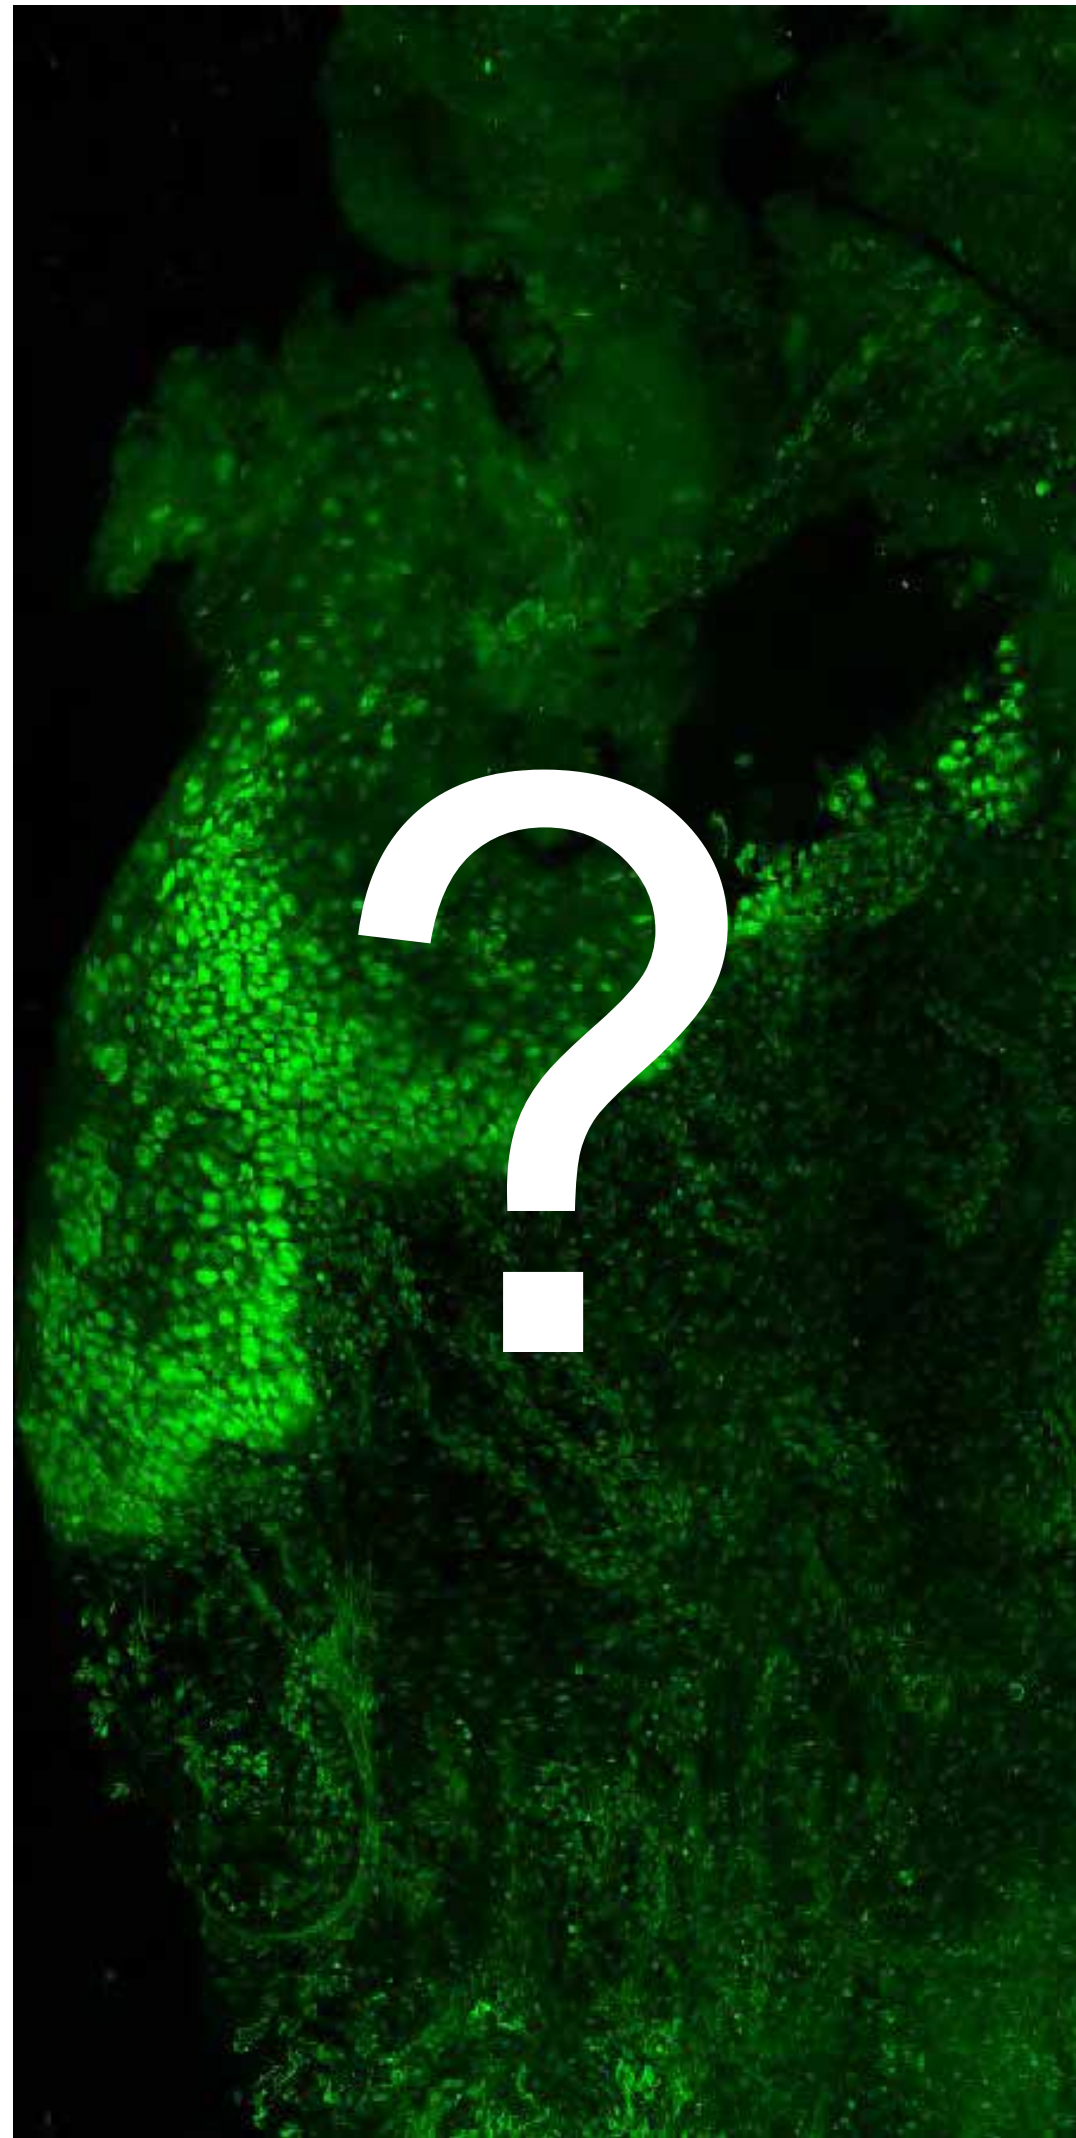

Tumor

Margin



4570

# Overview

Not available

Not available

PARPi-FL only (green)

PARPi-FL (green) + Autofluorescence (red/yellow)



4570

Close-up

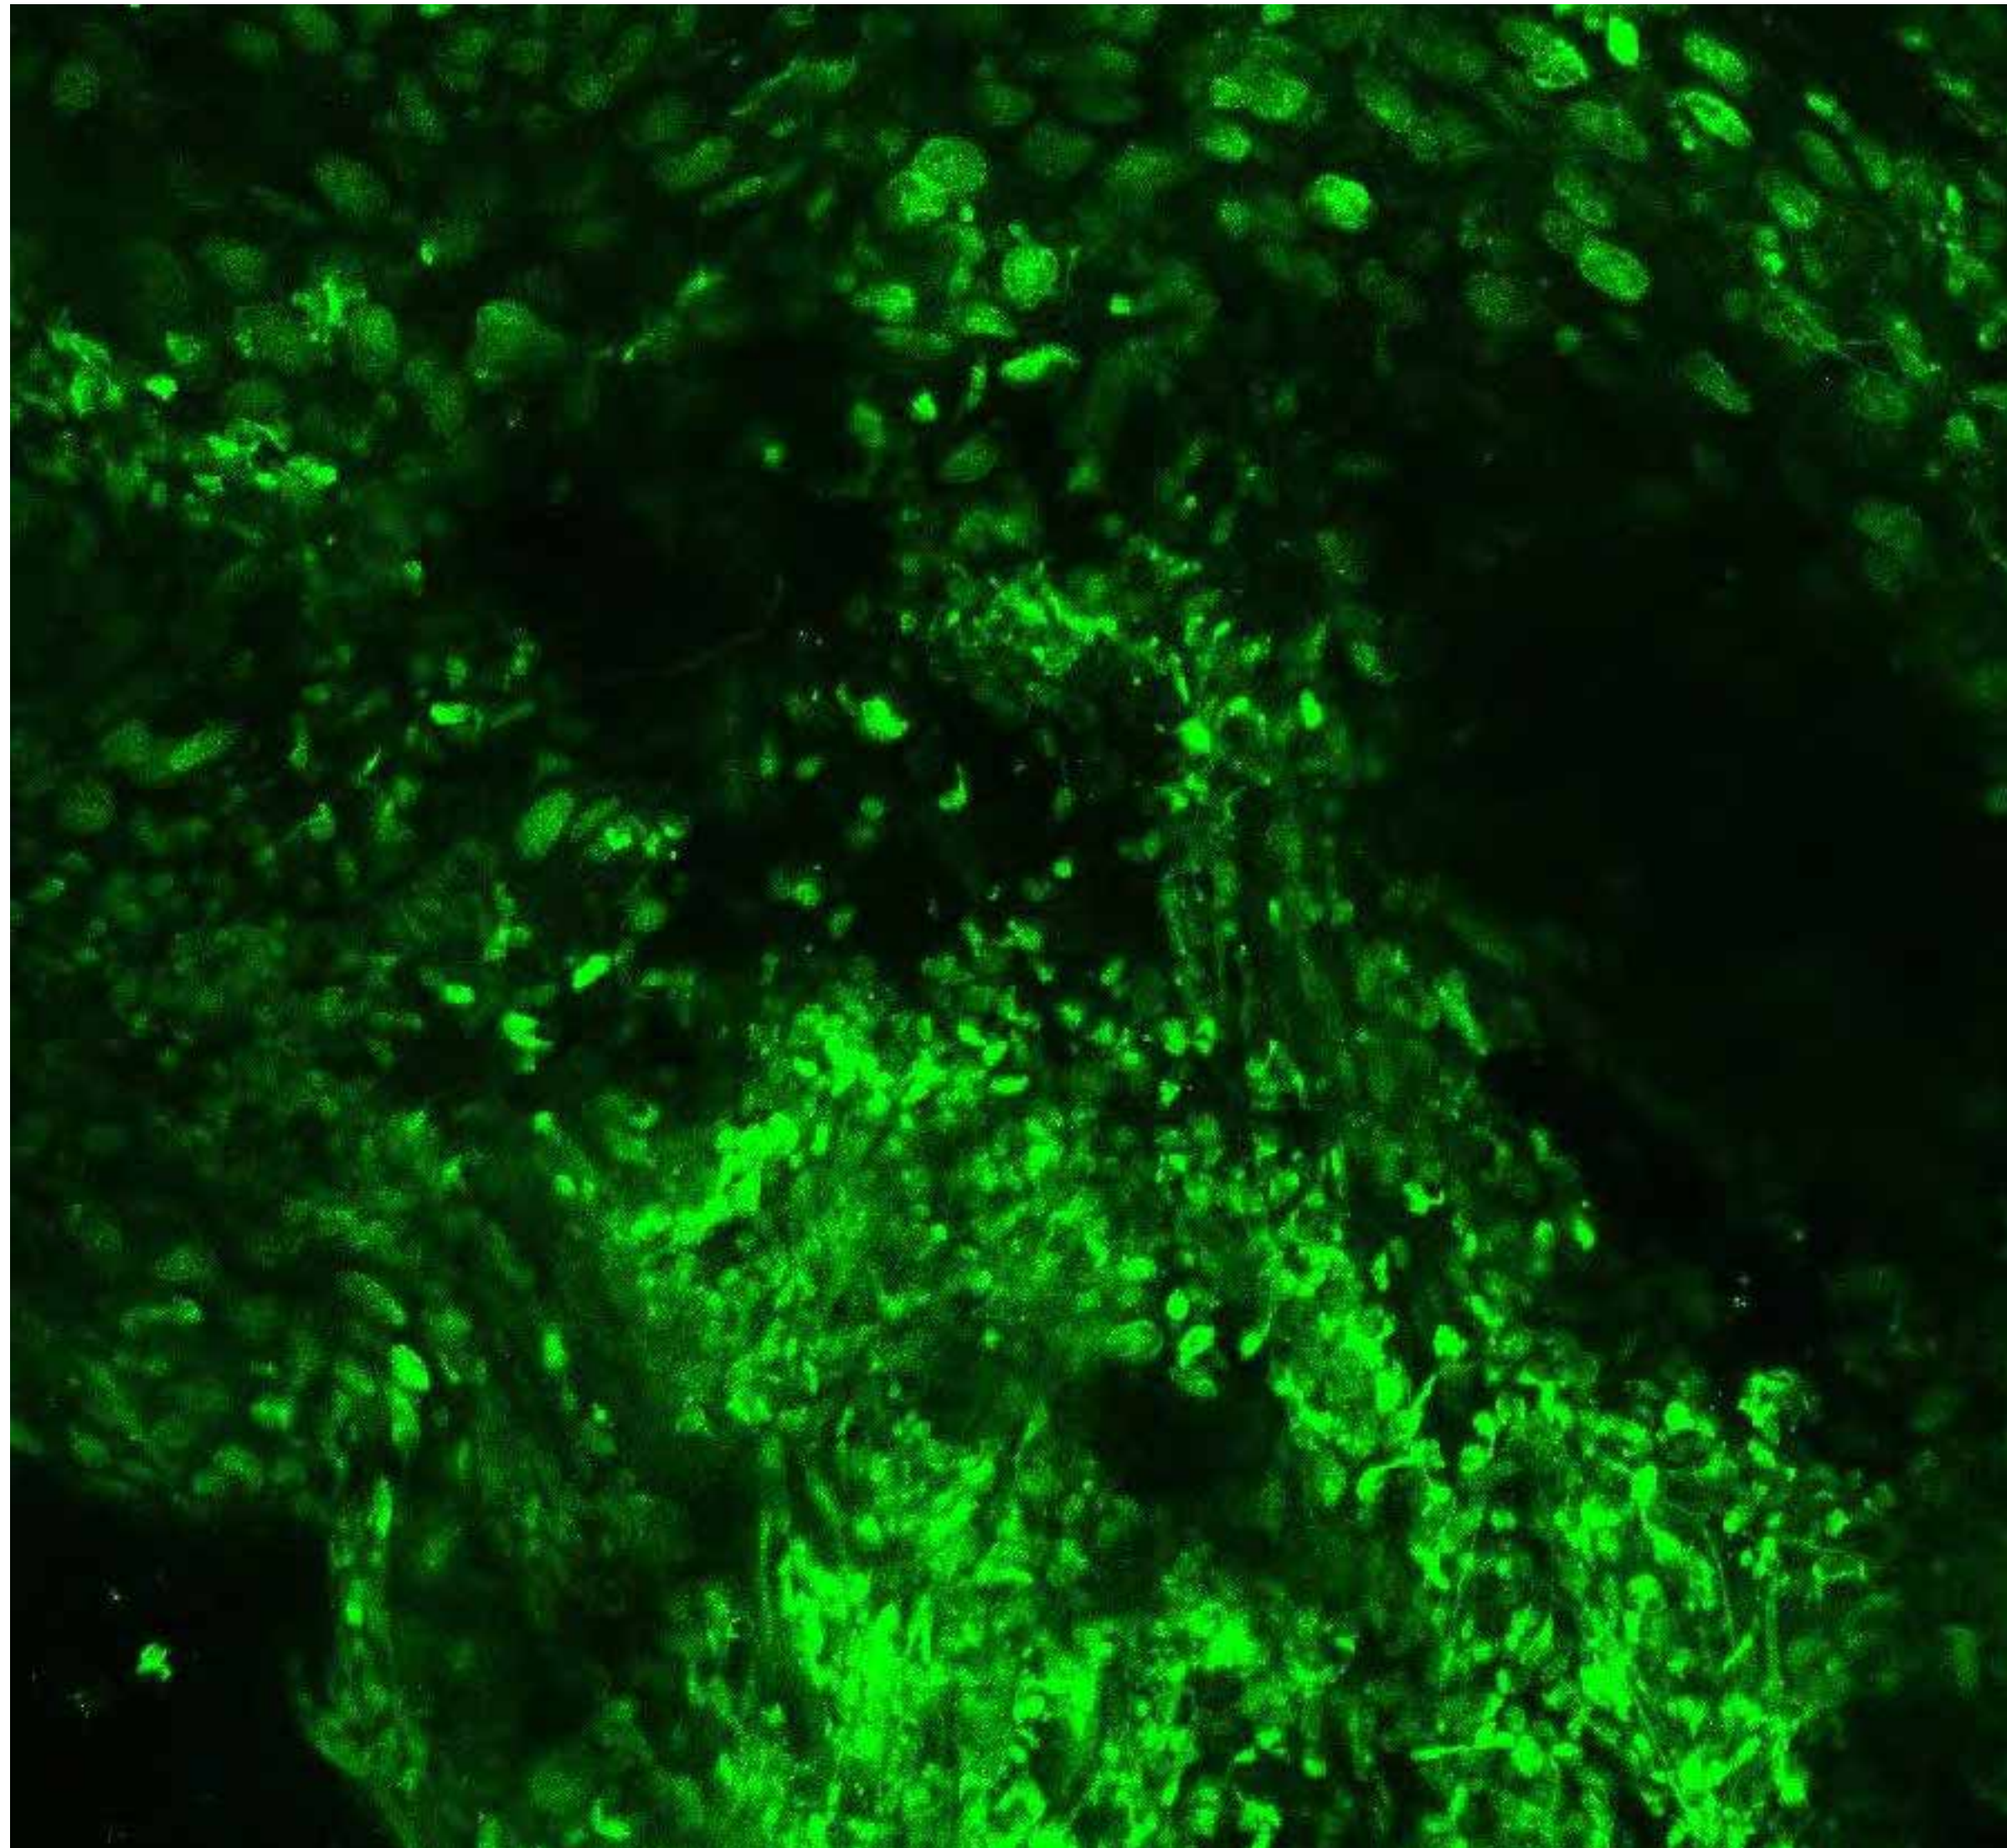

Not available

PARPi-FL only (green)

PARPi-FL (green) + Autofluorescence (red/yellow)



4570

Close-up

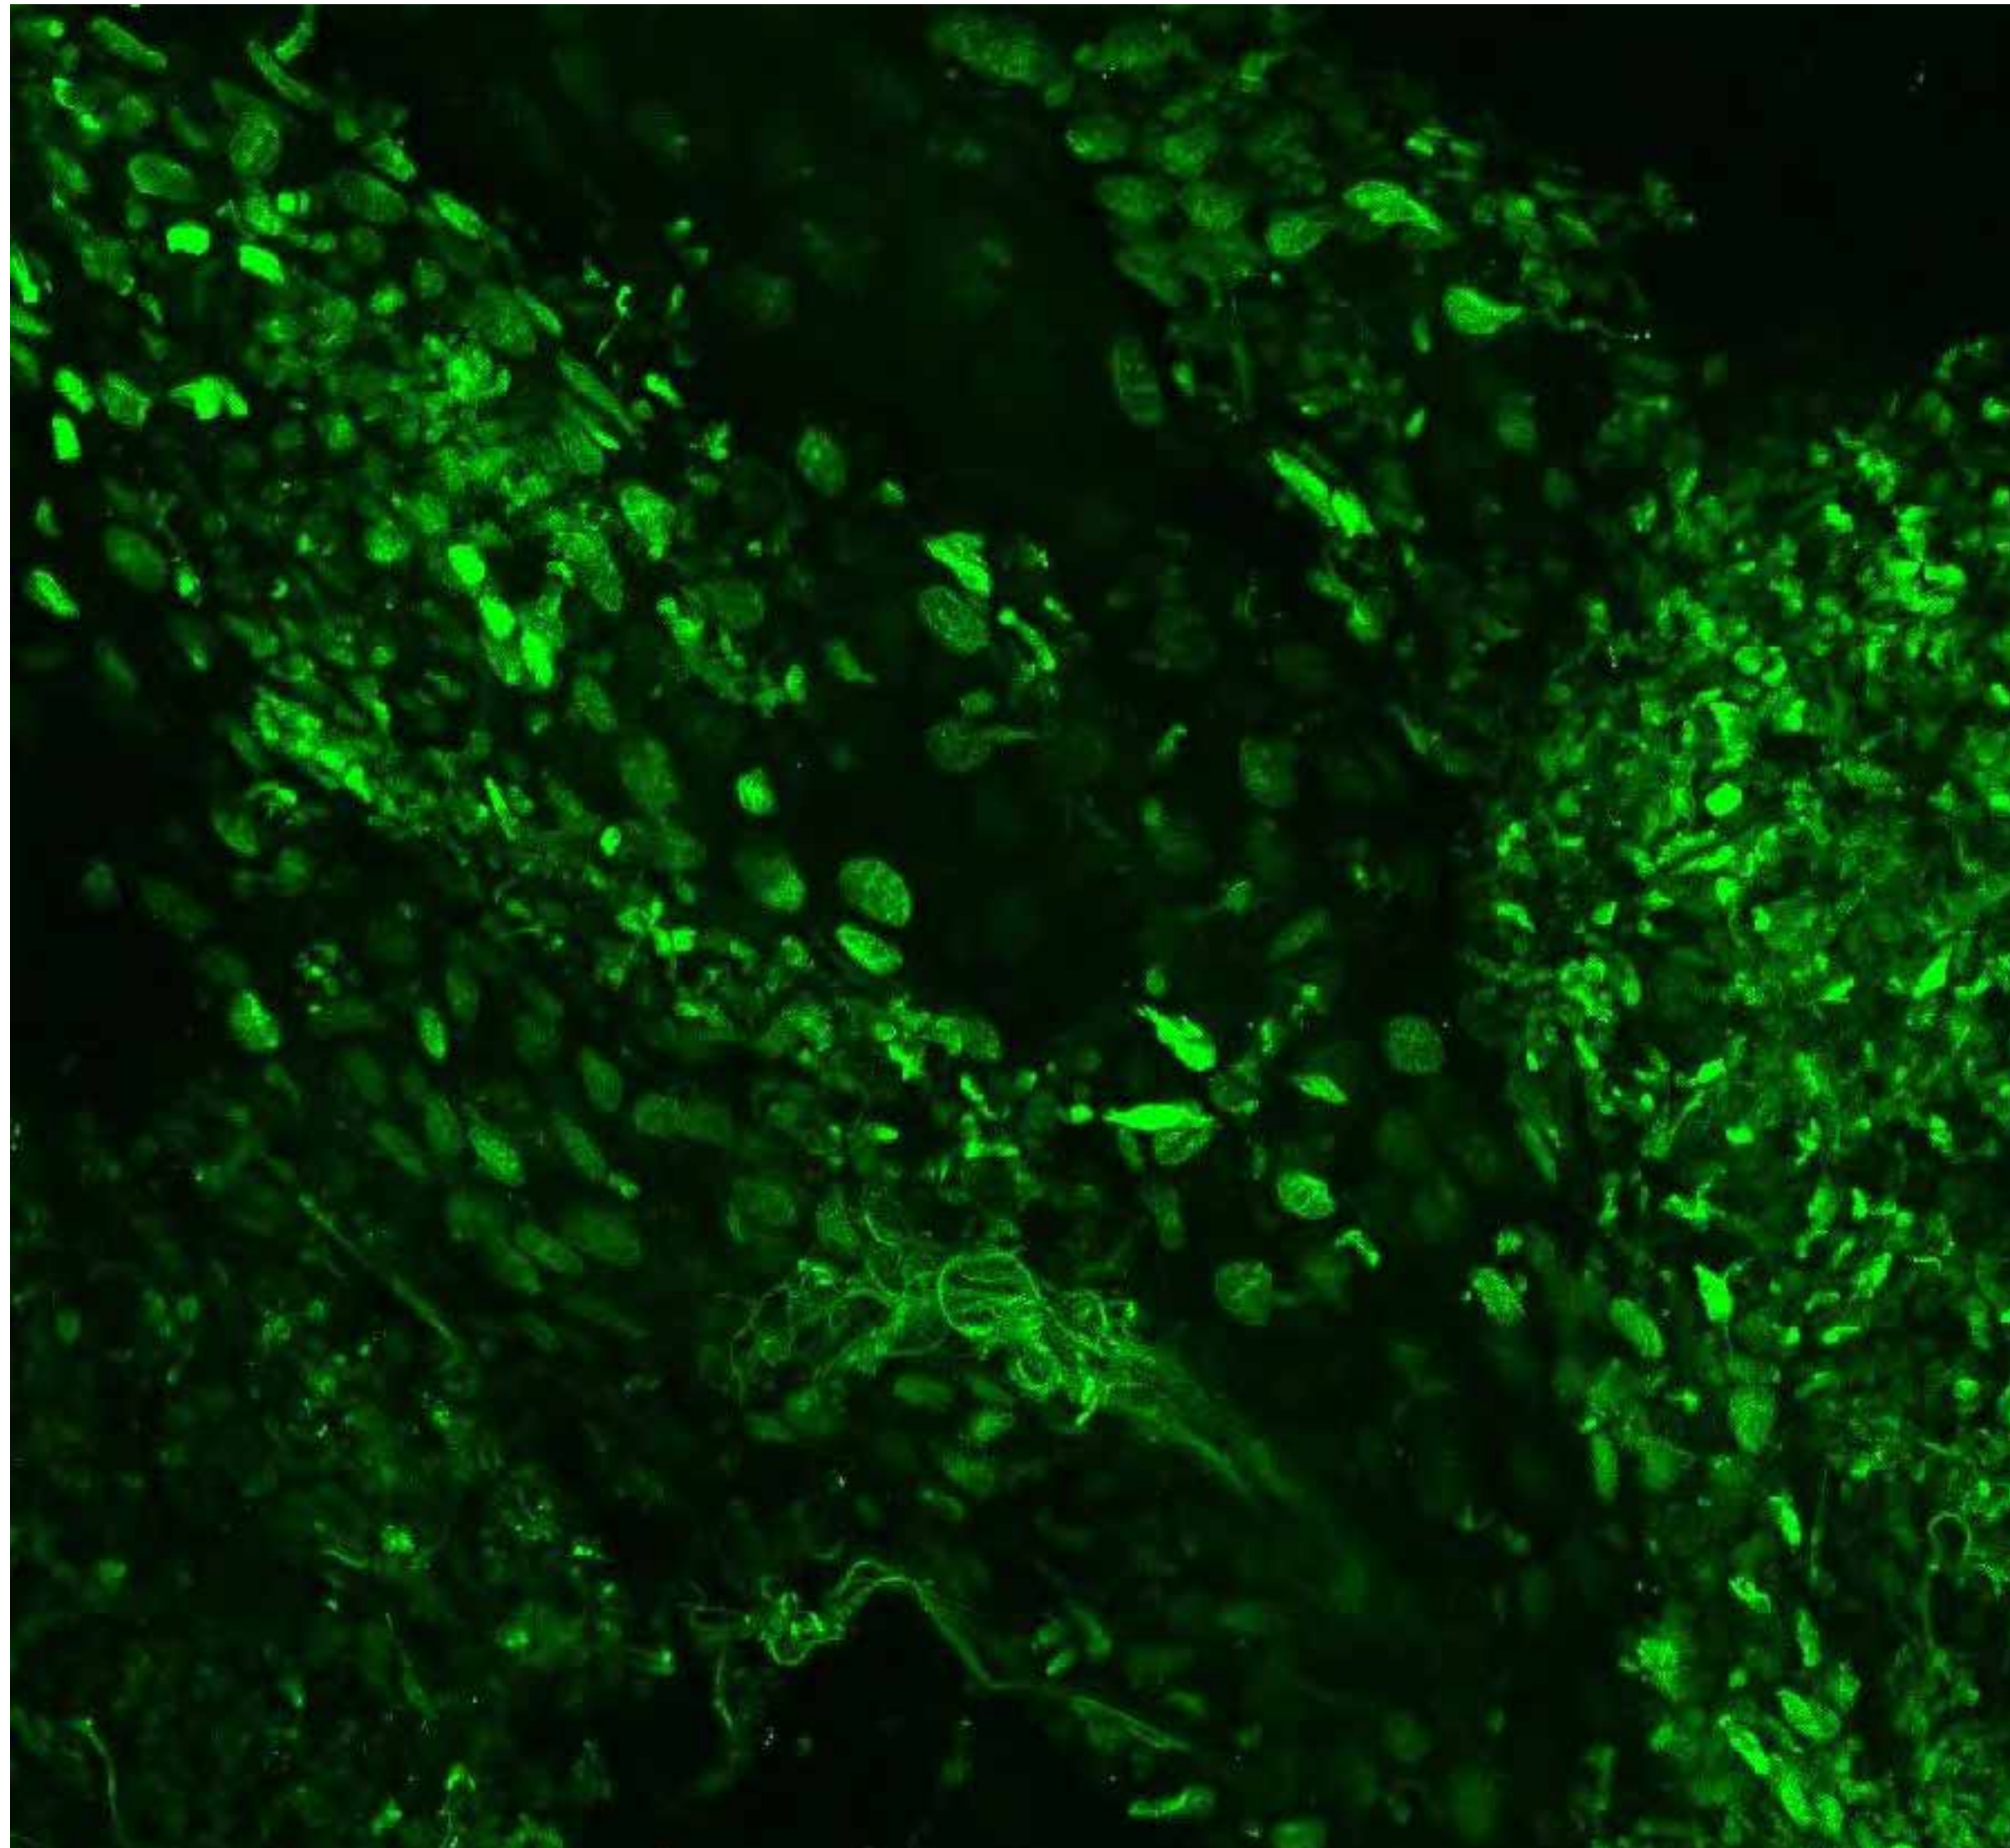

Not available

PARPi-FL only (green)

PARPi-FL (green) + Autofluorescence (red/yellow)



4570

Close-up

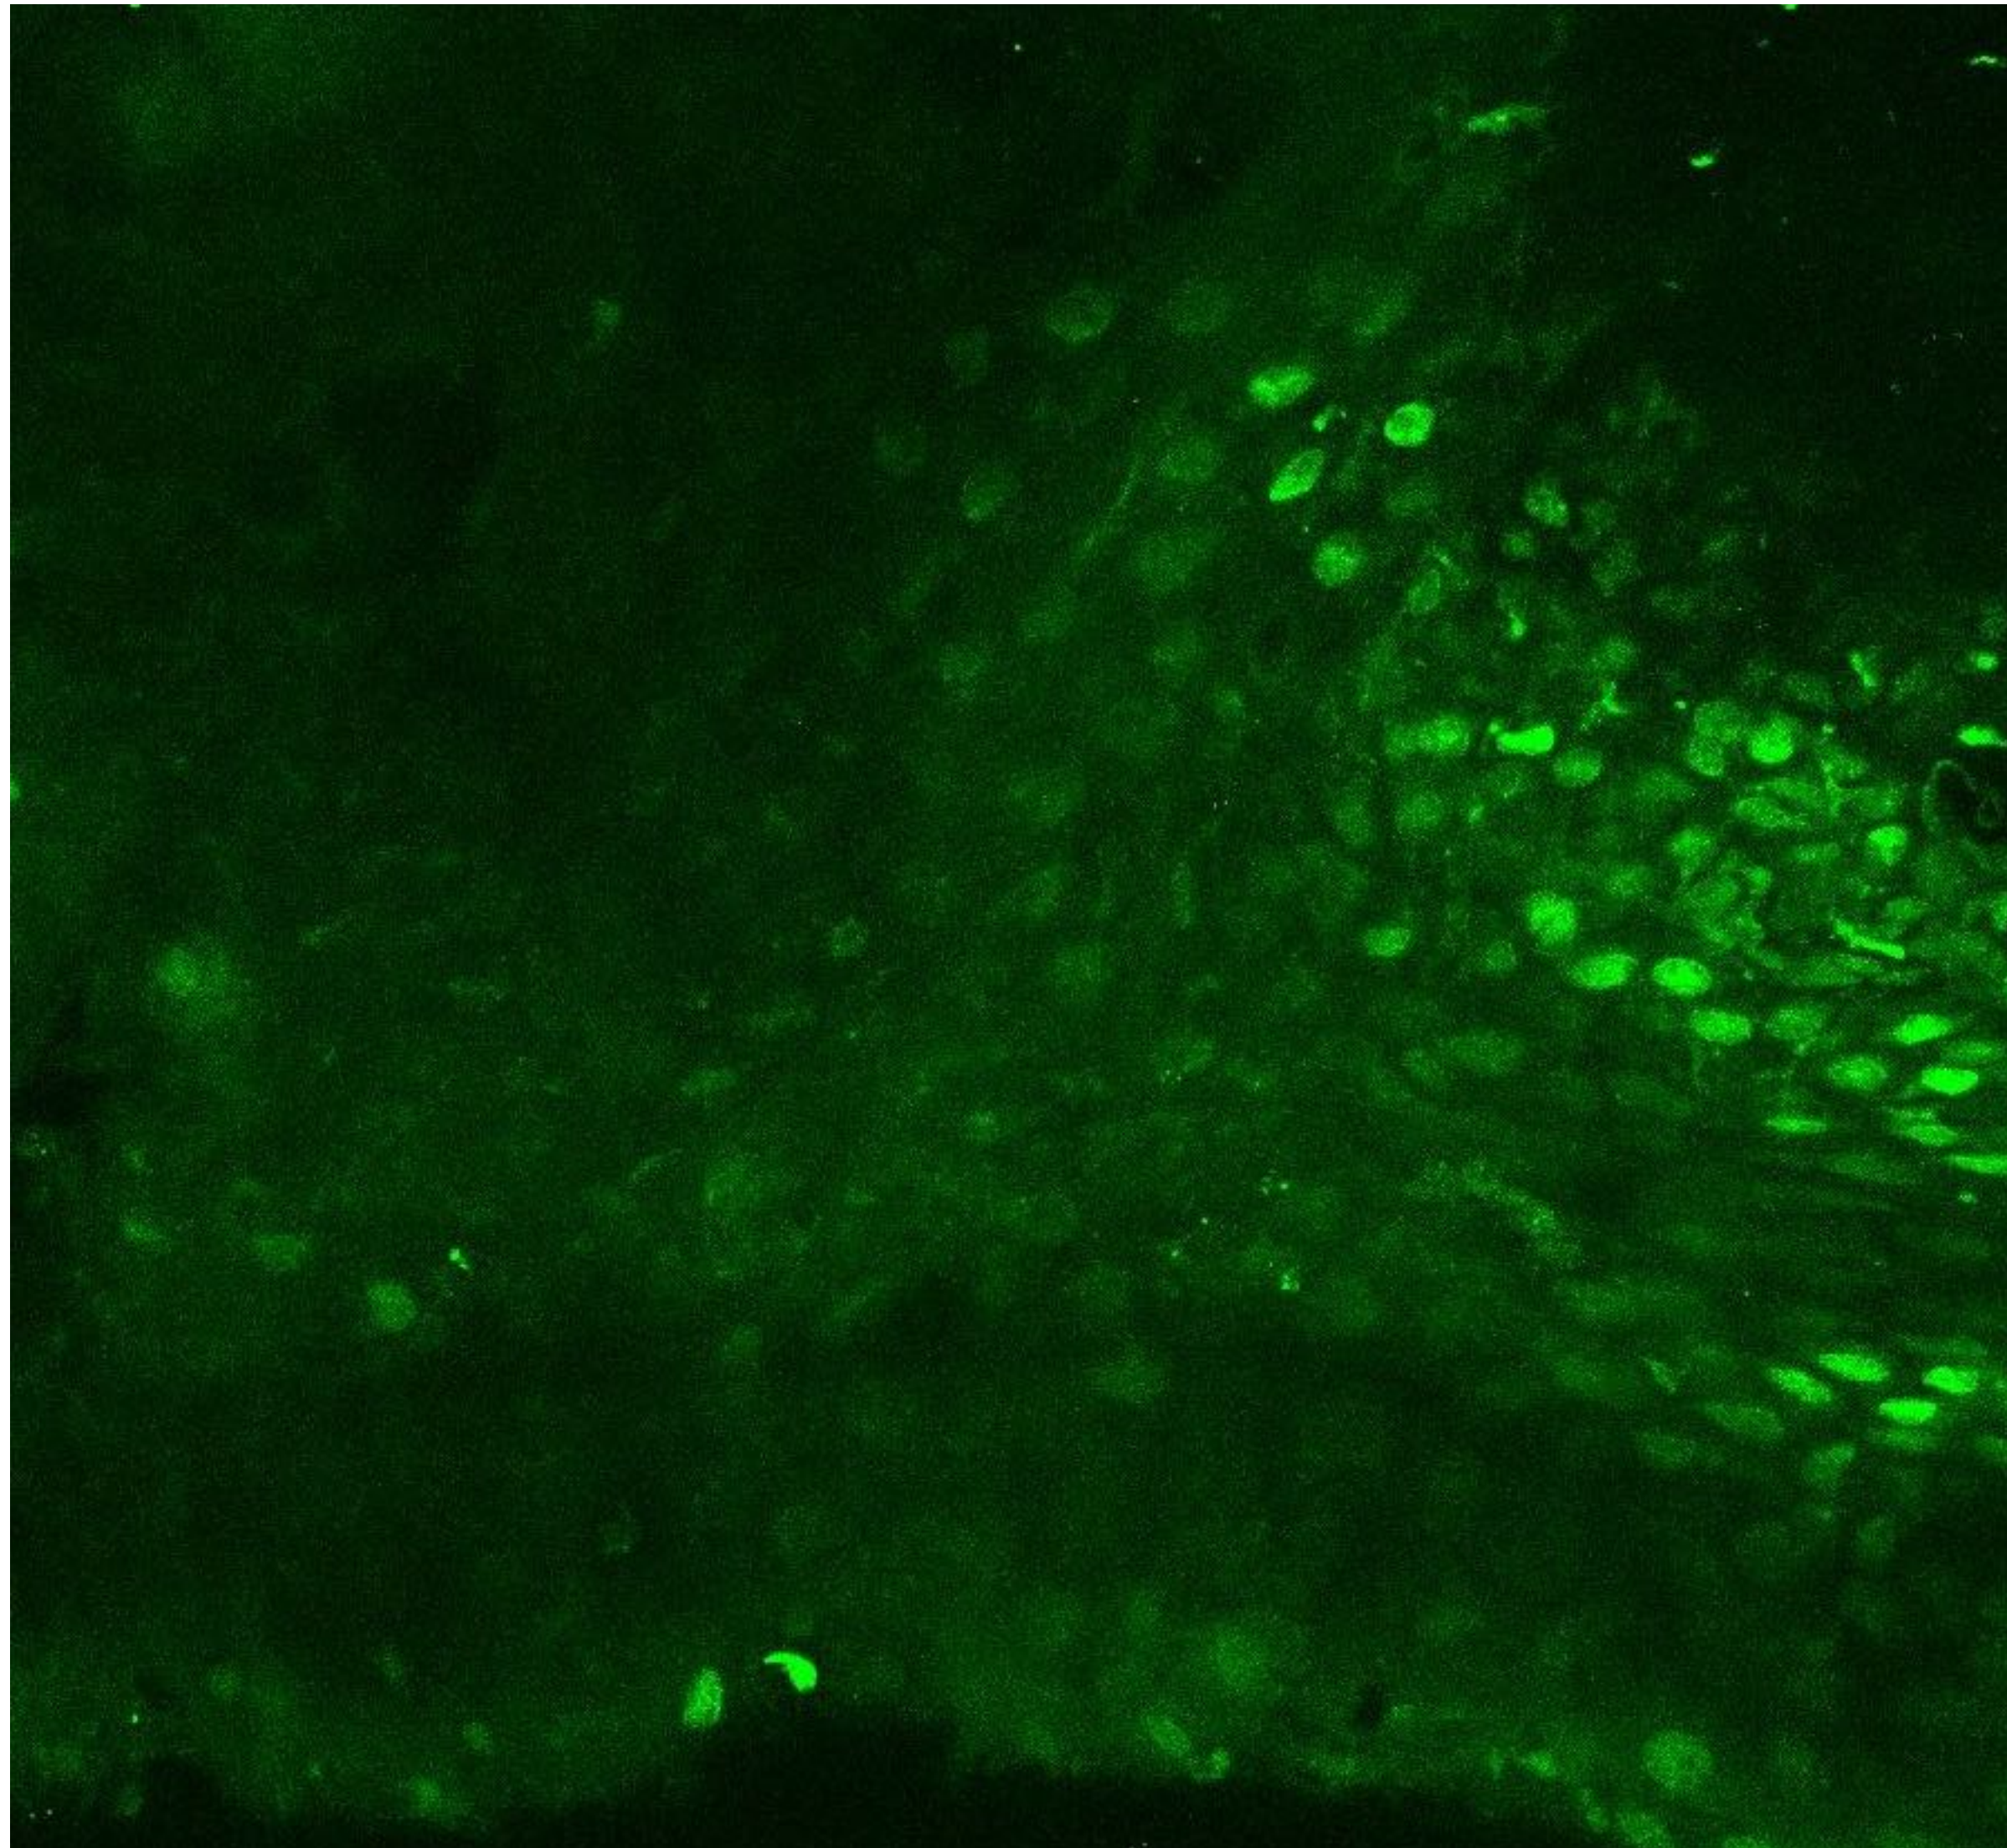

Not available

PARPi-FL only (green)

PARPi-FL (green) + Autofluorescence (red/yellow)



4570

Close-up

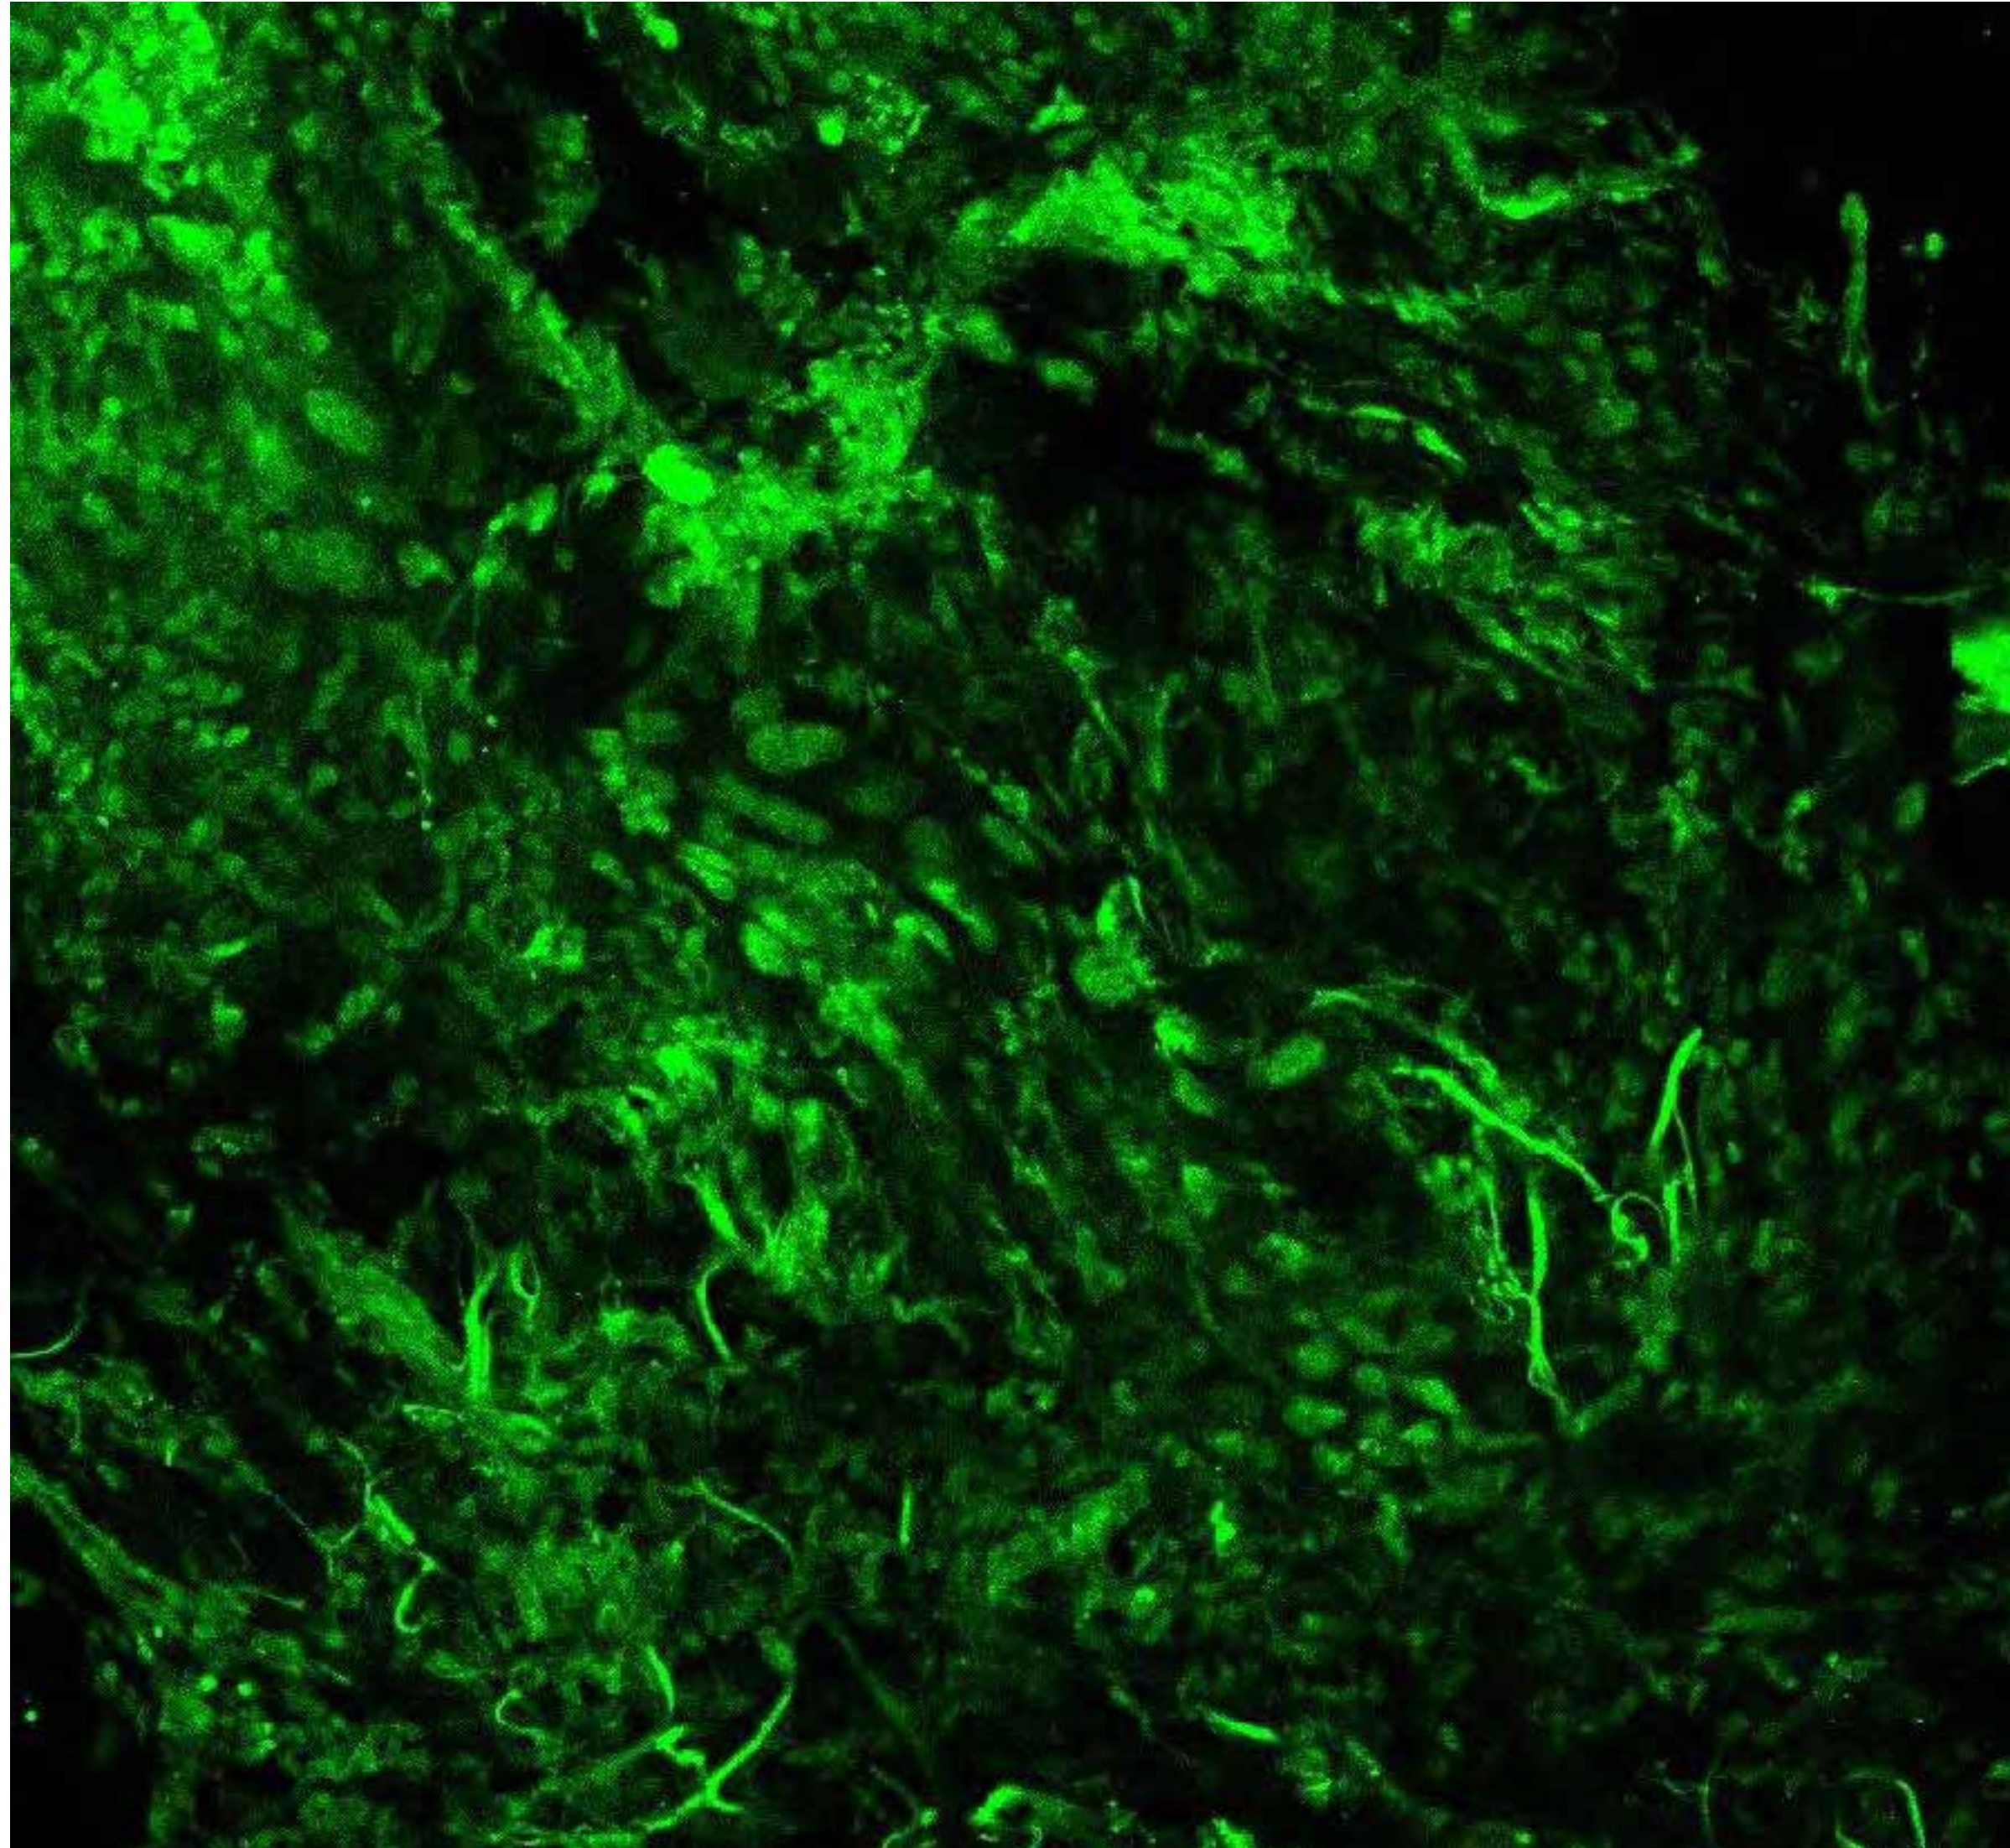

Not available

PARPi-FL only (green)

PARPi-FL (green) + Autofluorescence (red/yellow)



4570

10

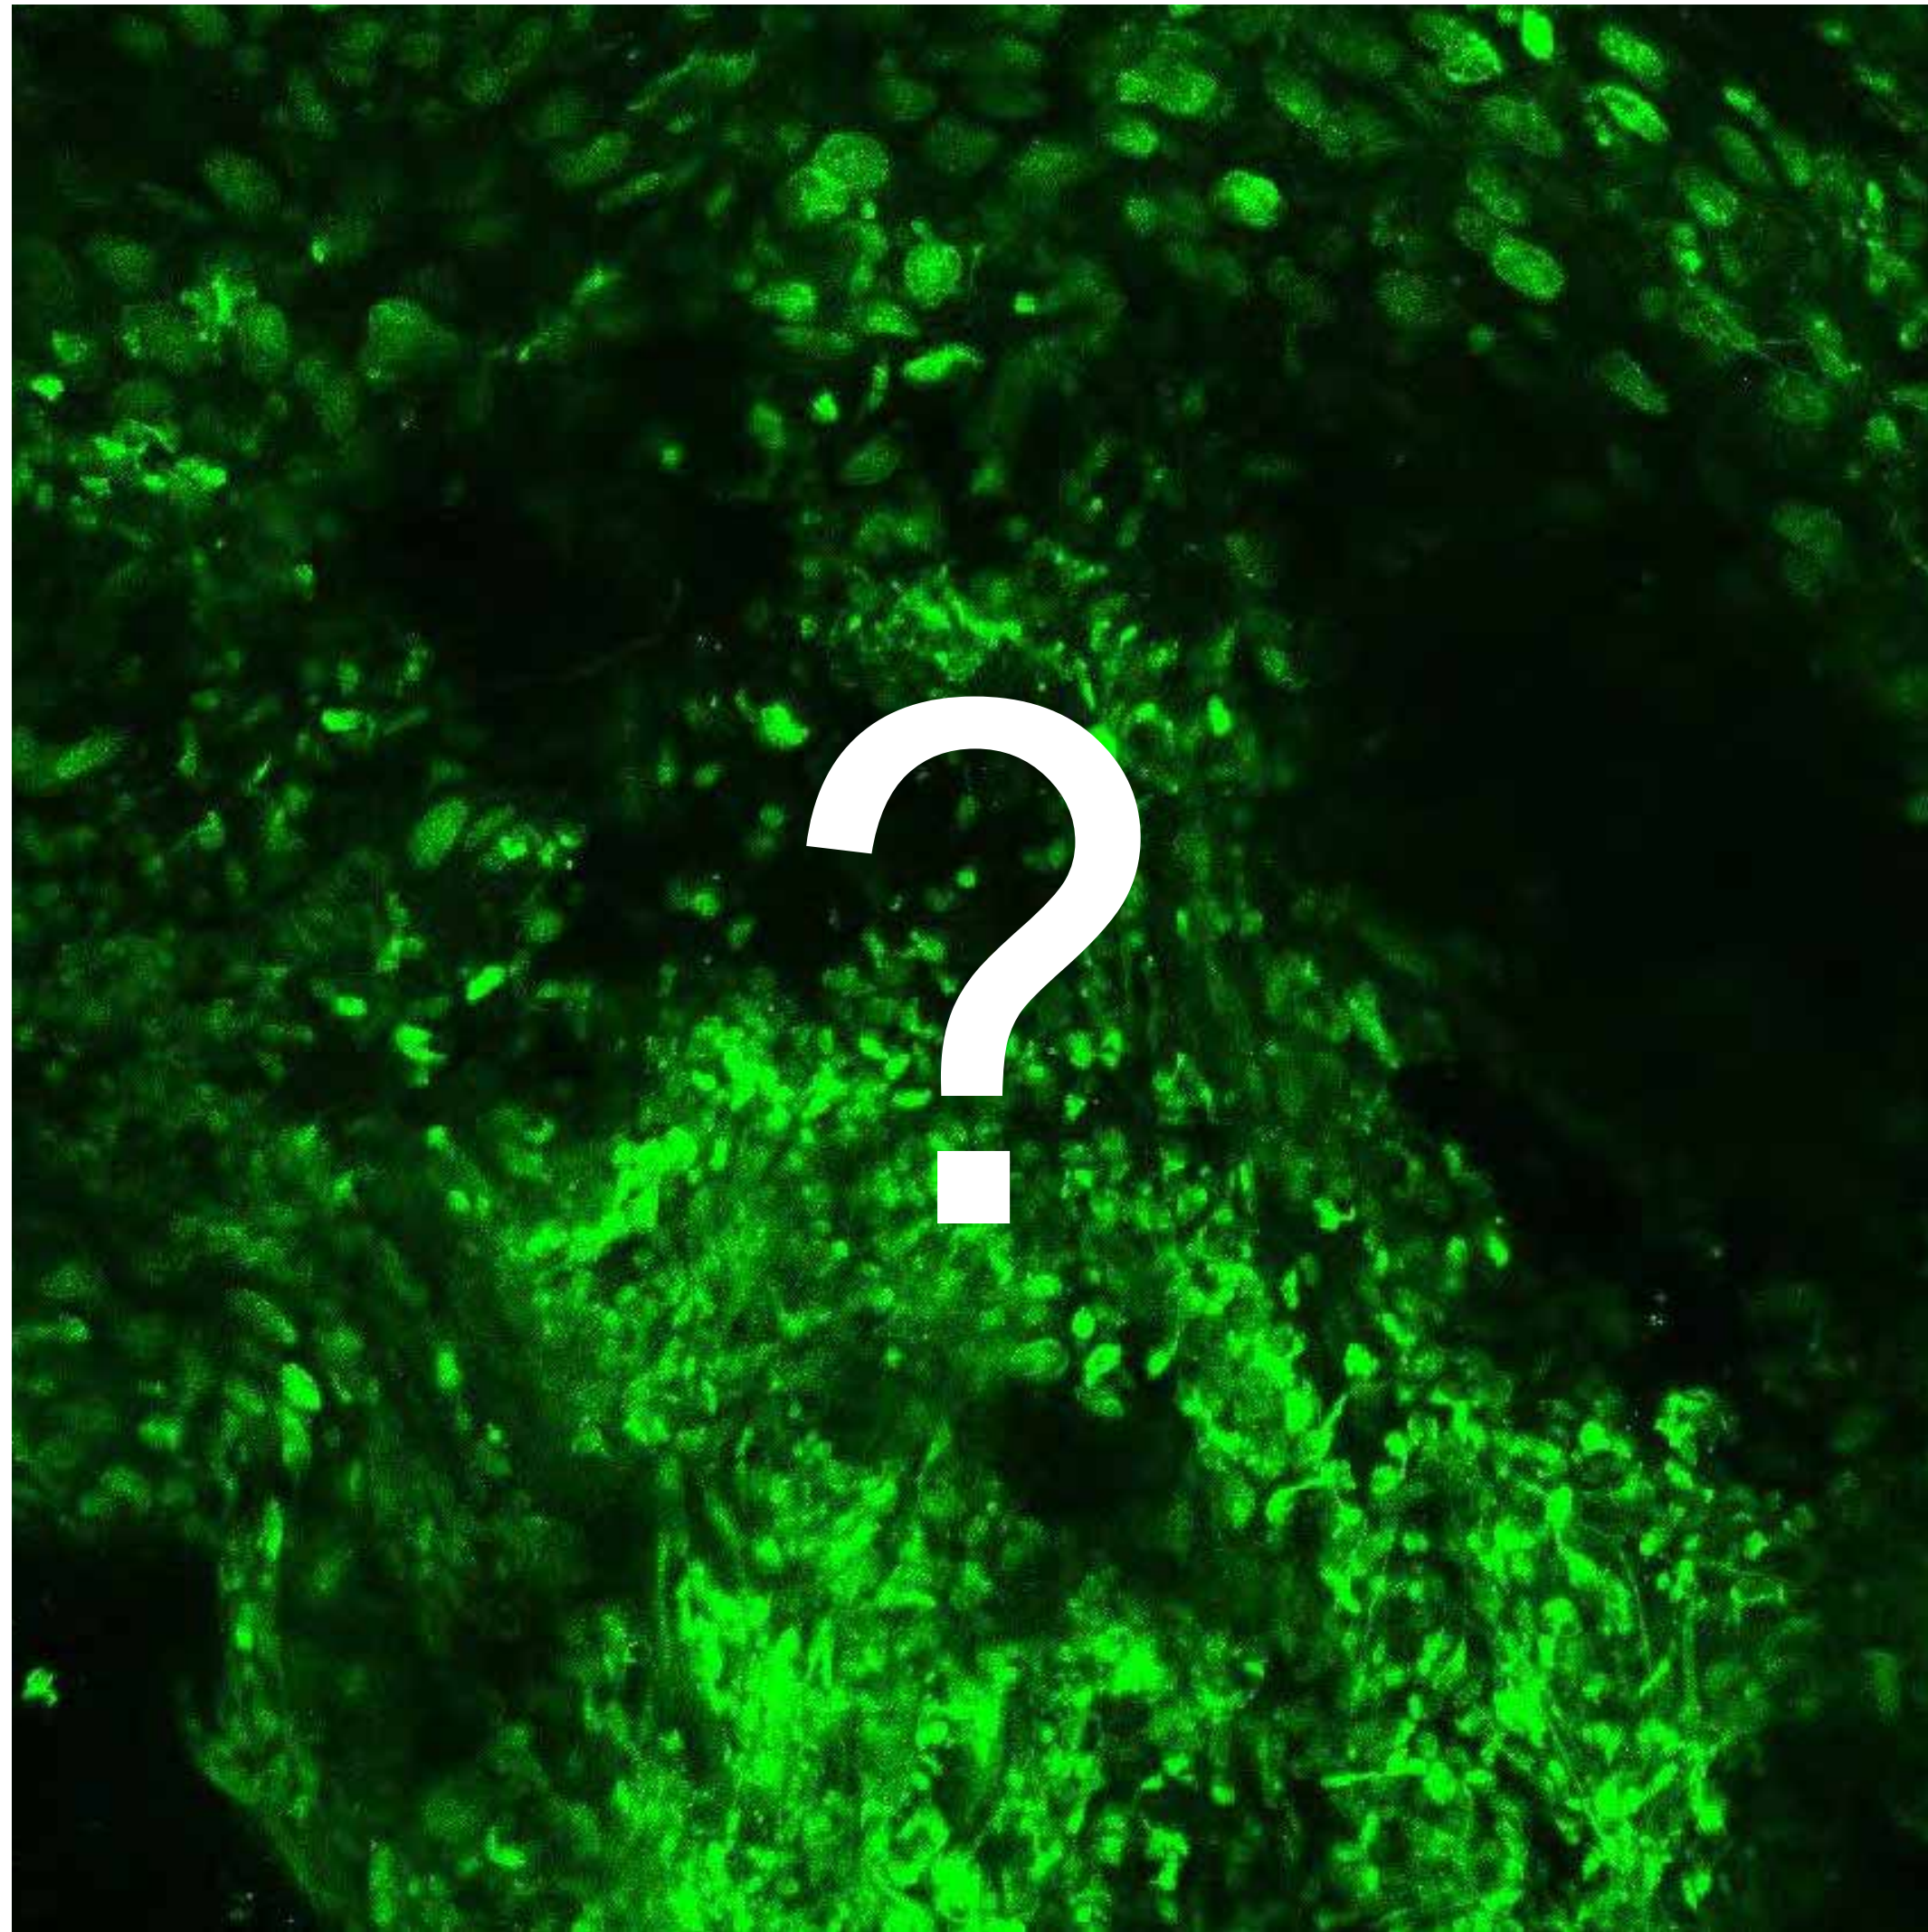

Tumor

Margin



4574

# Overview

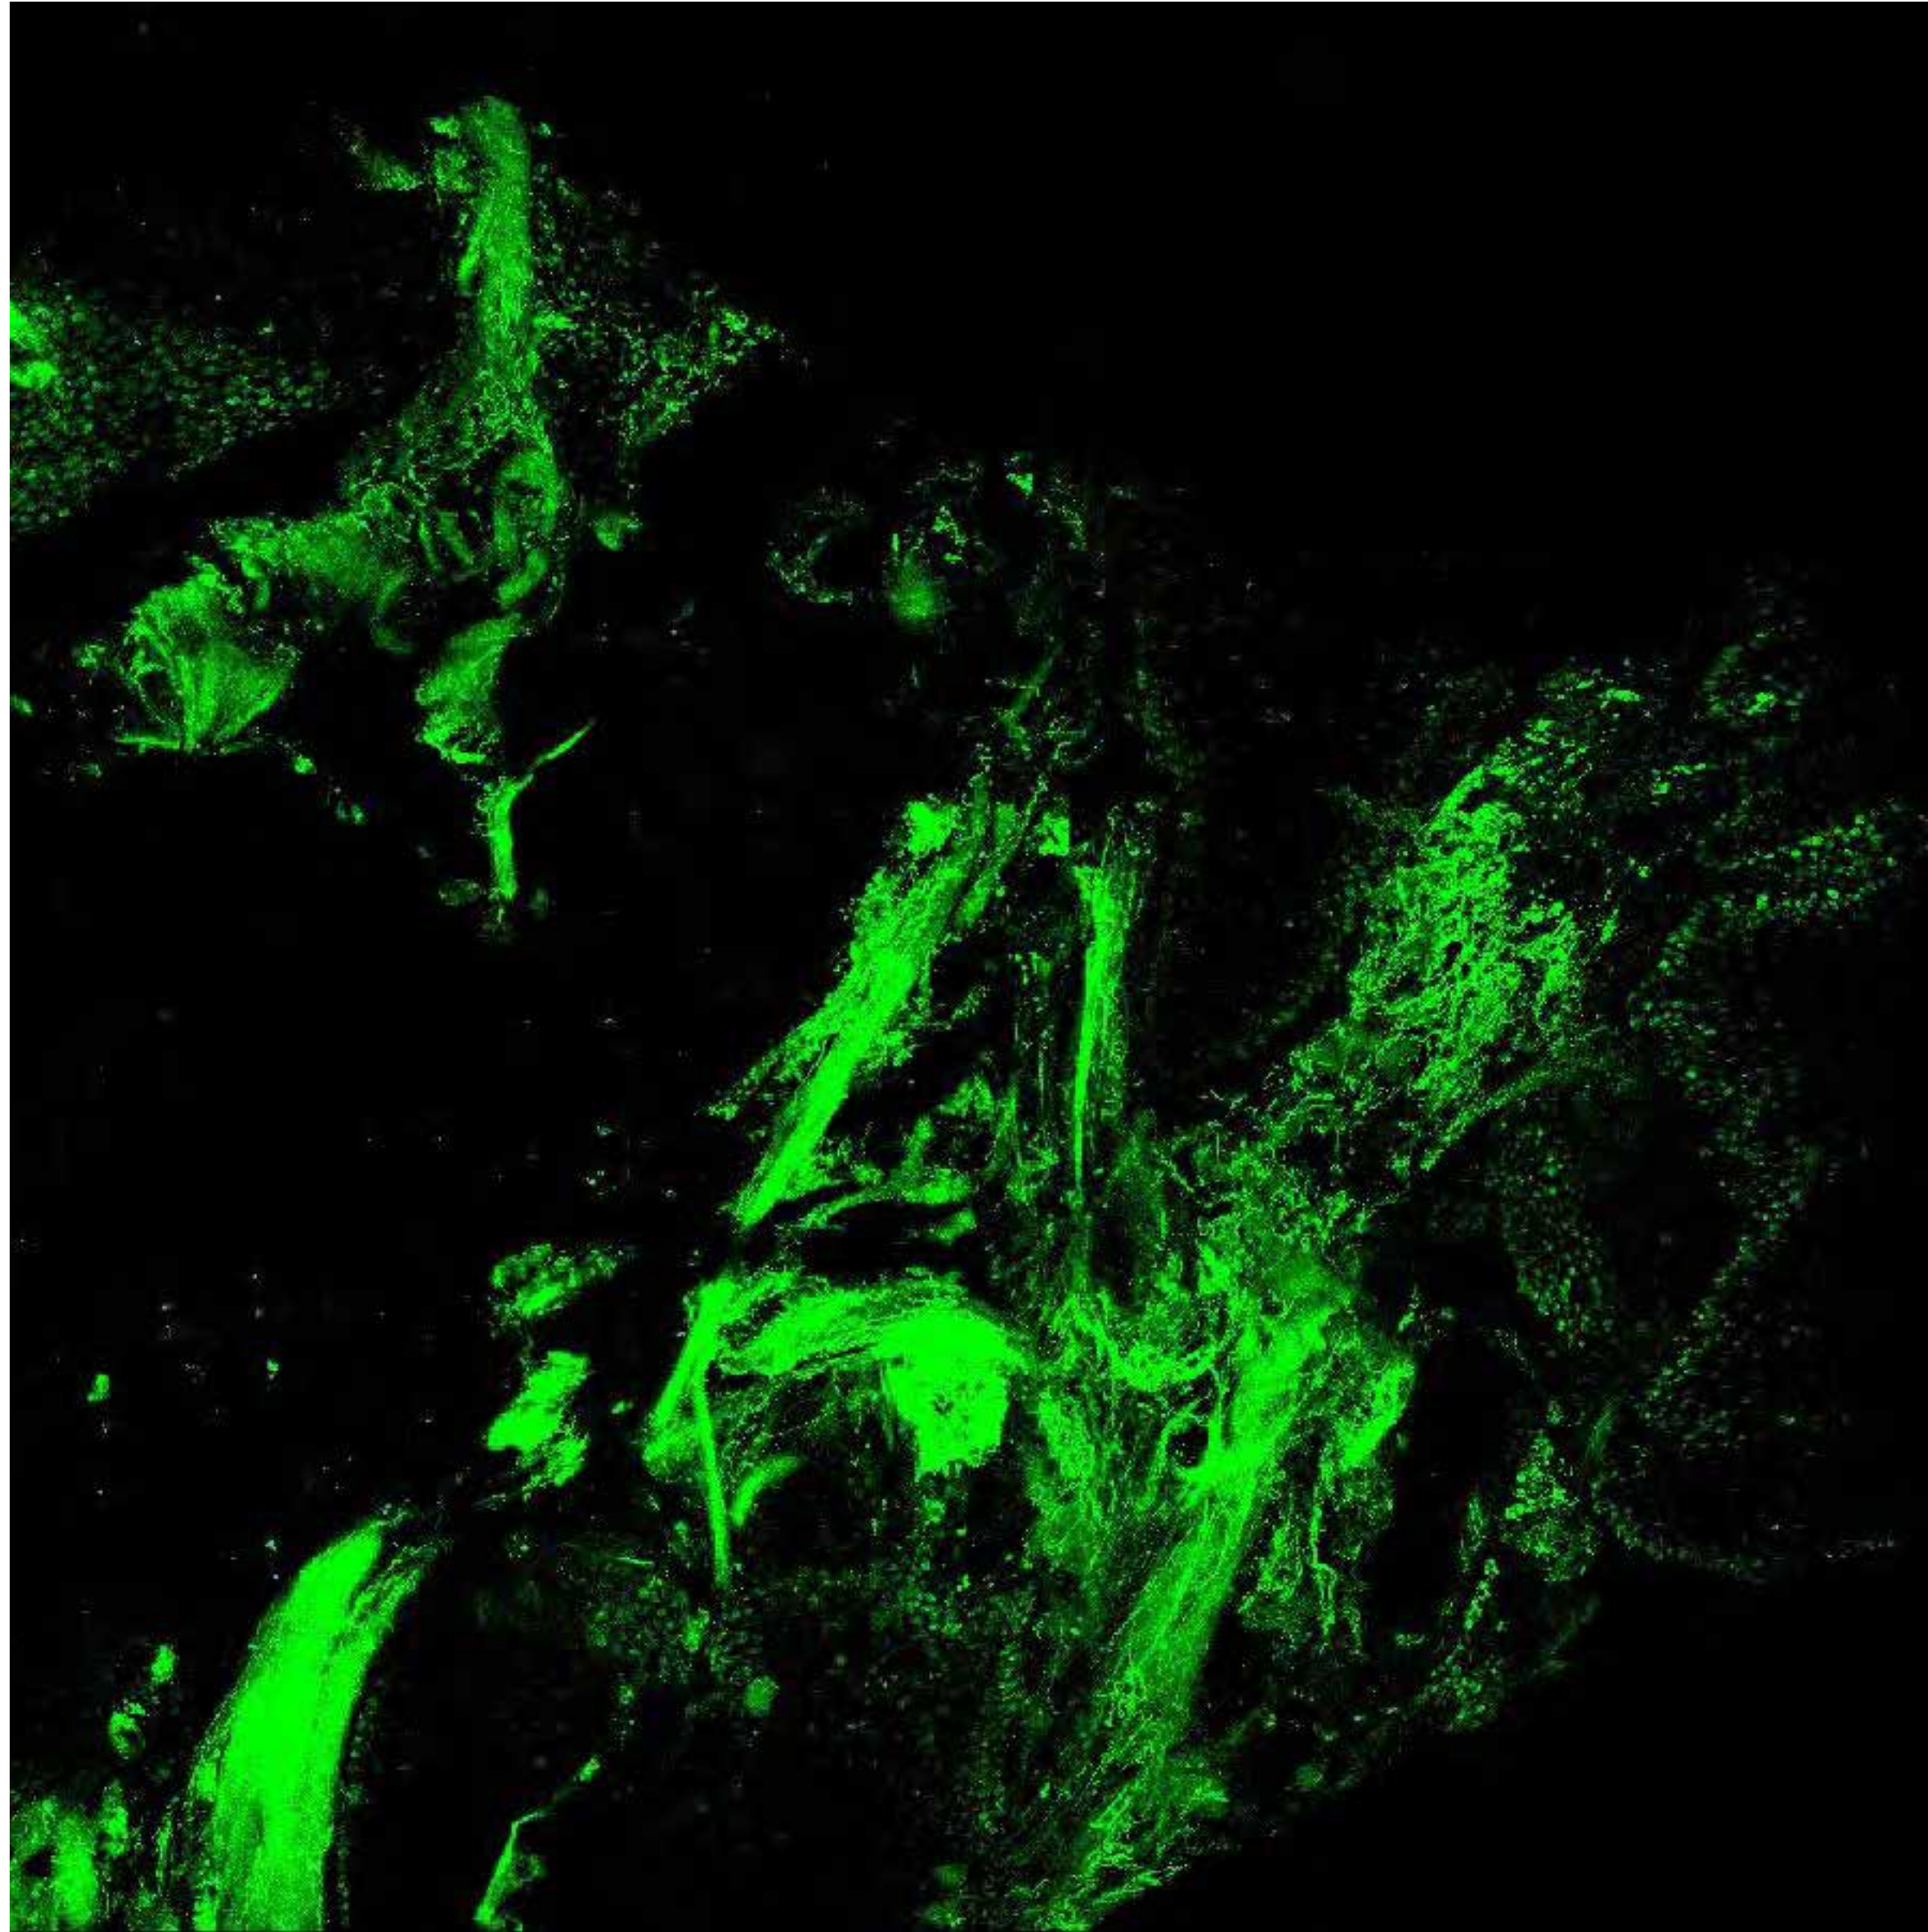

PARPi-FL only (green)

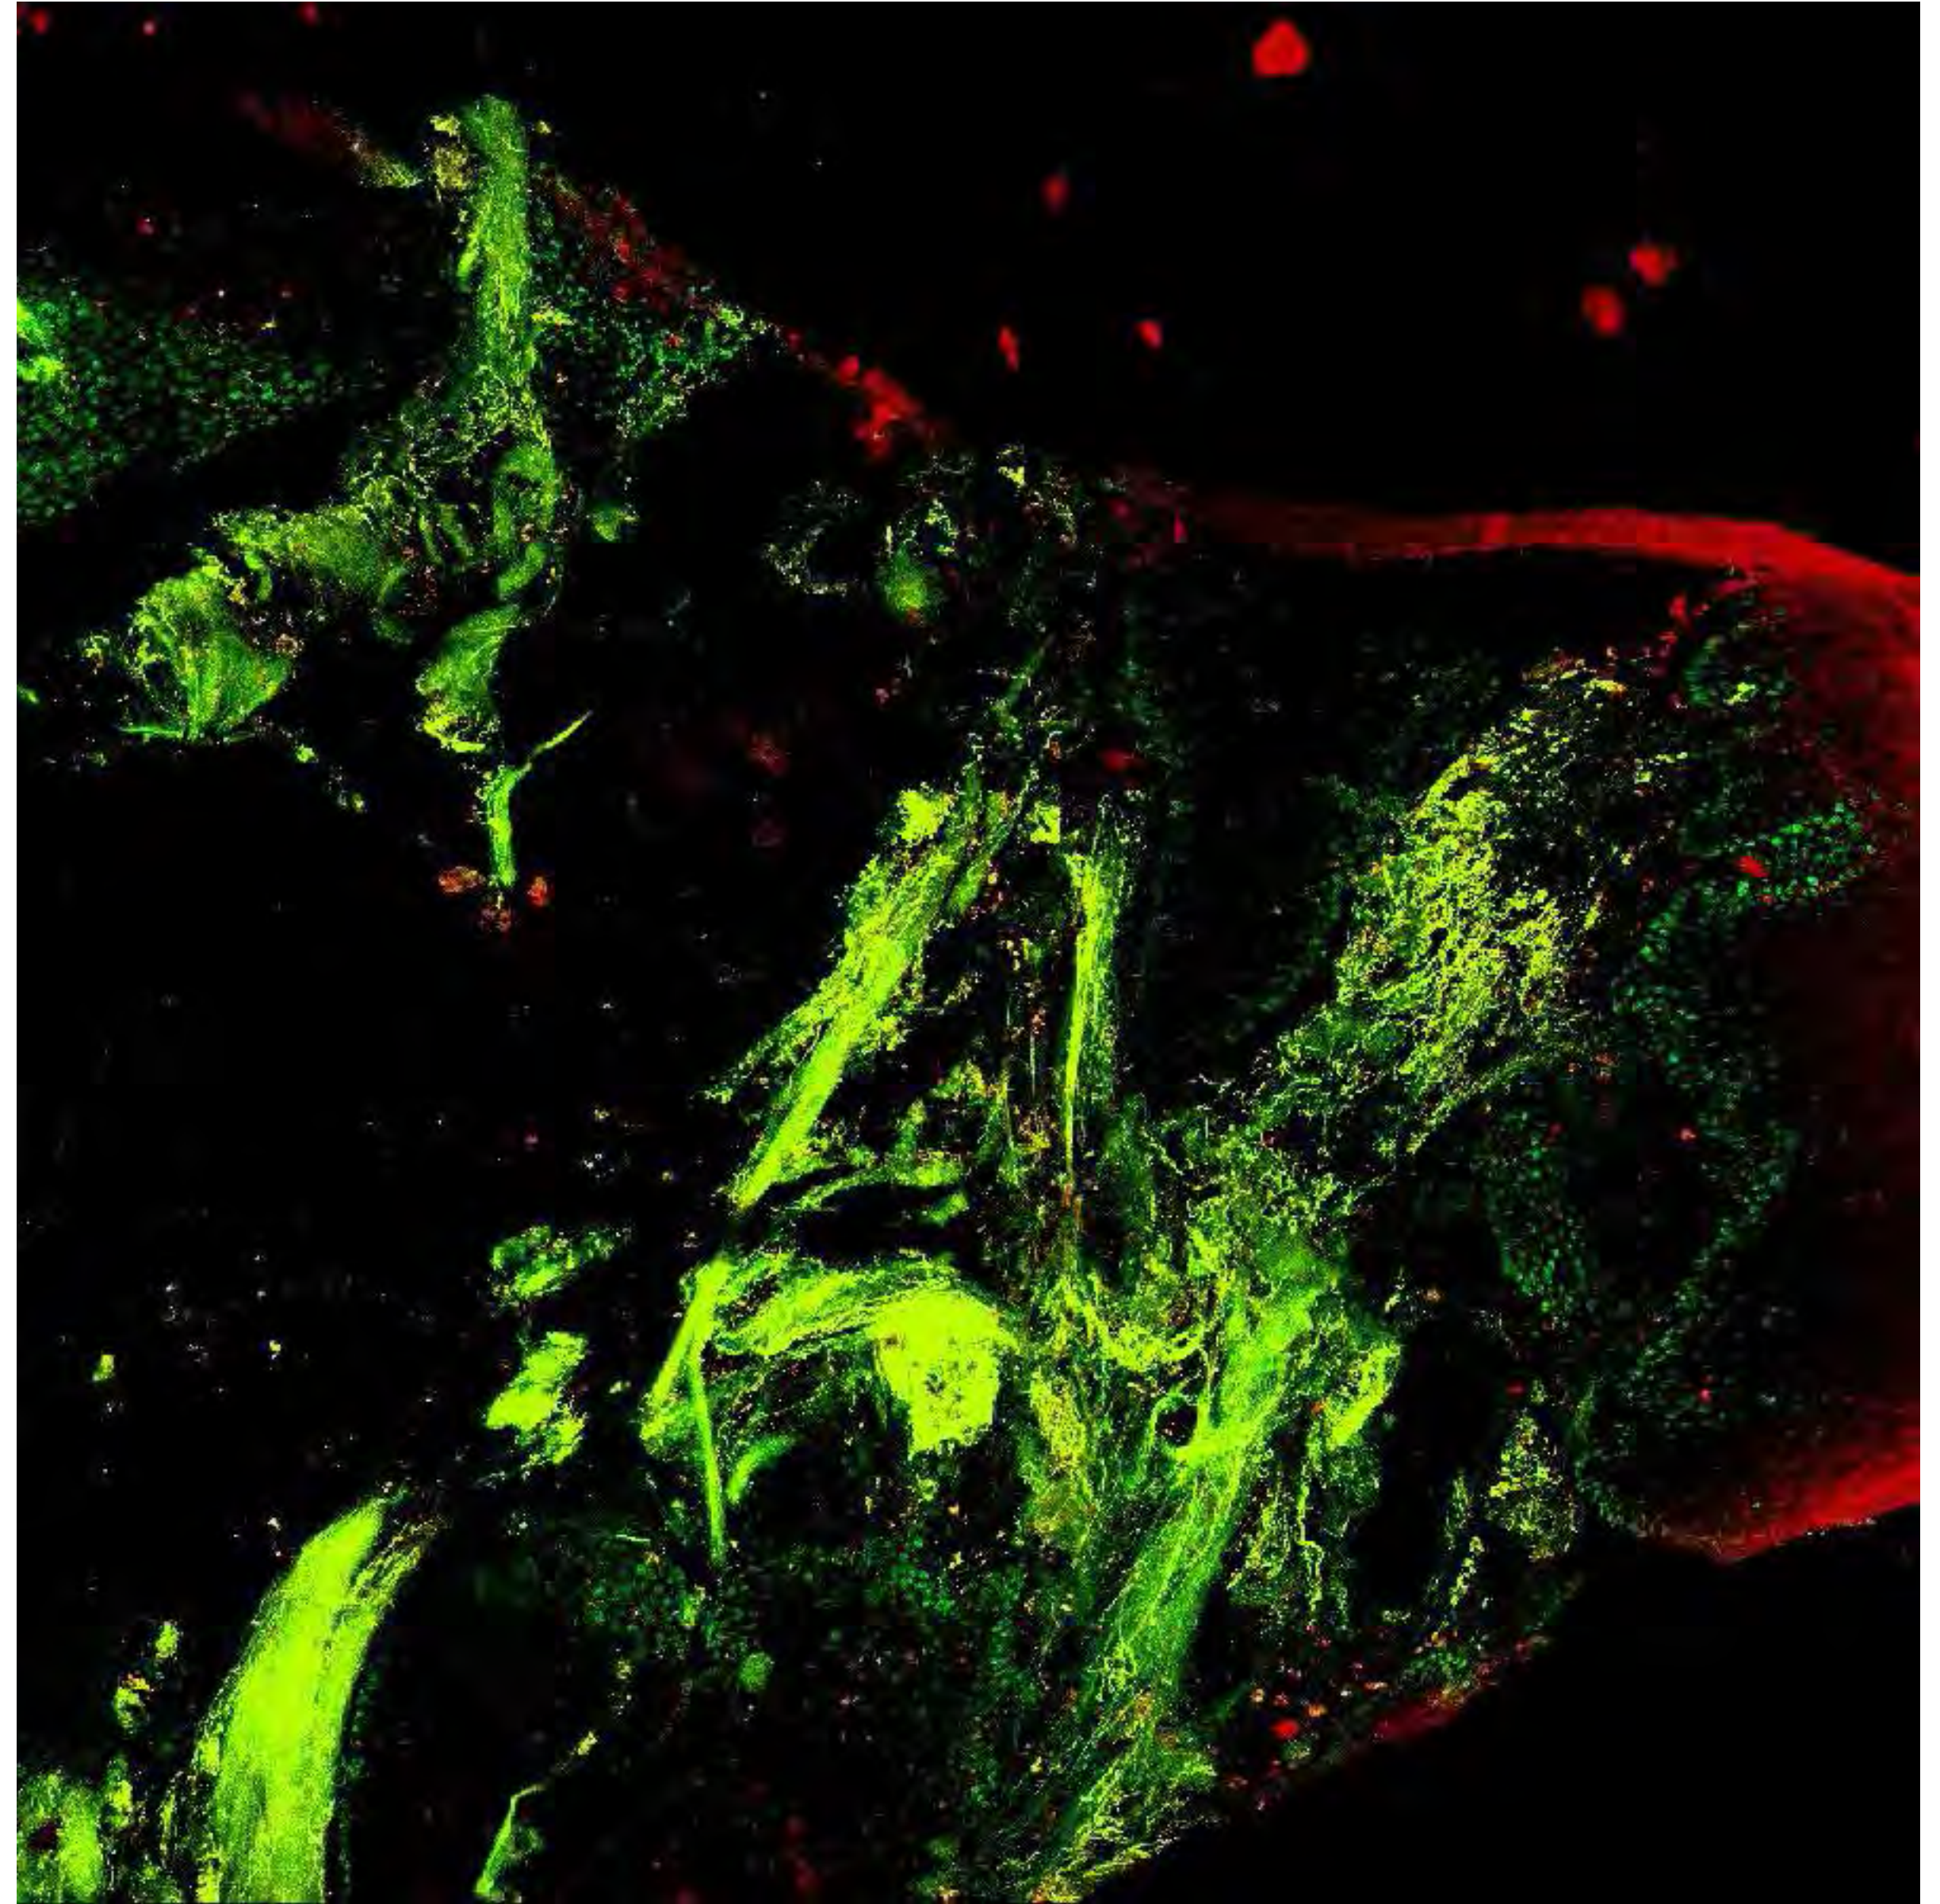

PARPi-FL (green) + Autofluorescence (red/yellow)



4574

Close-up

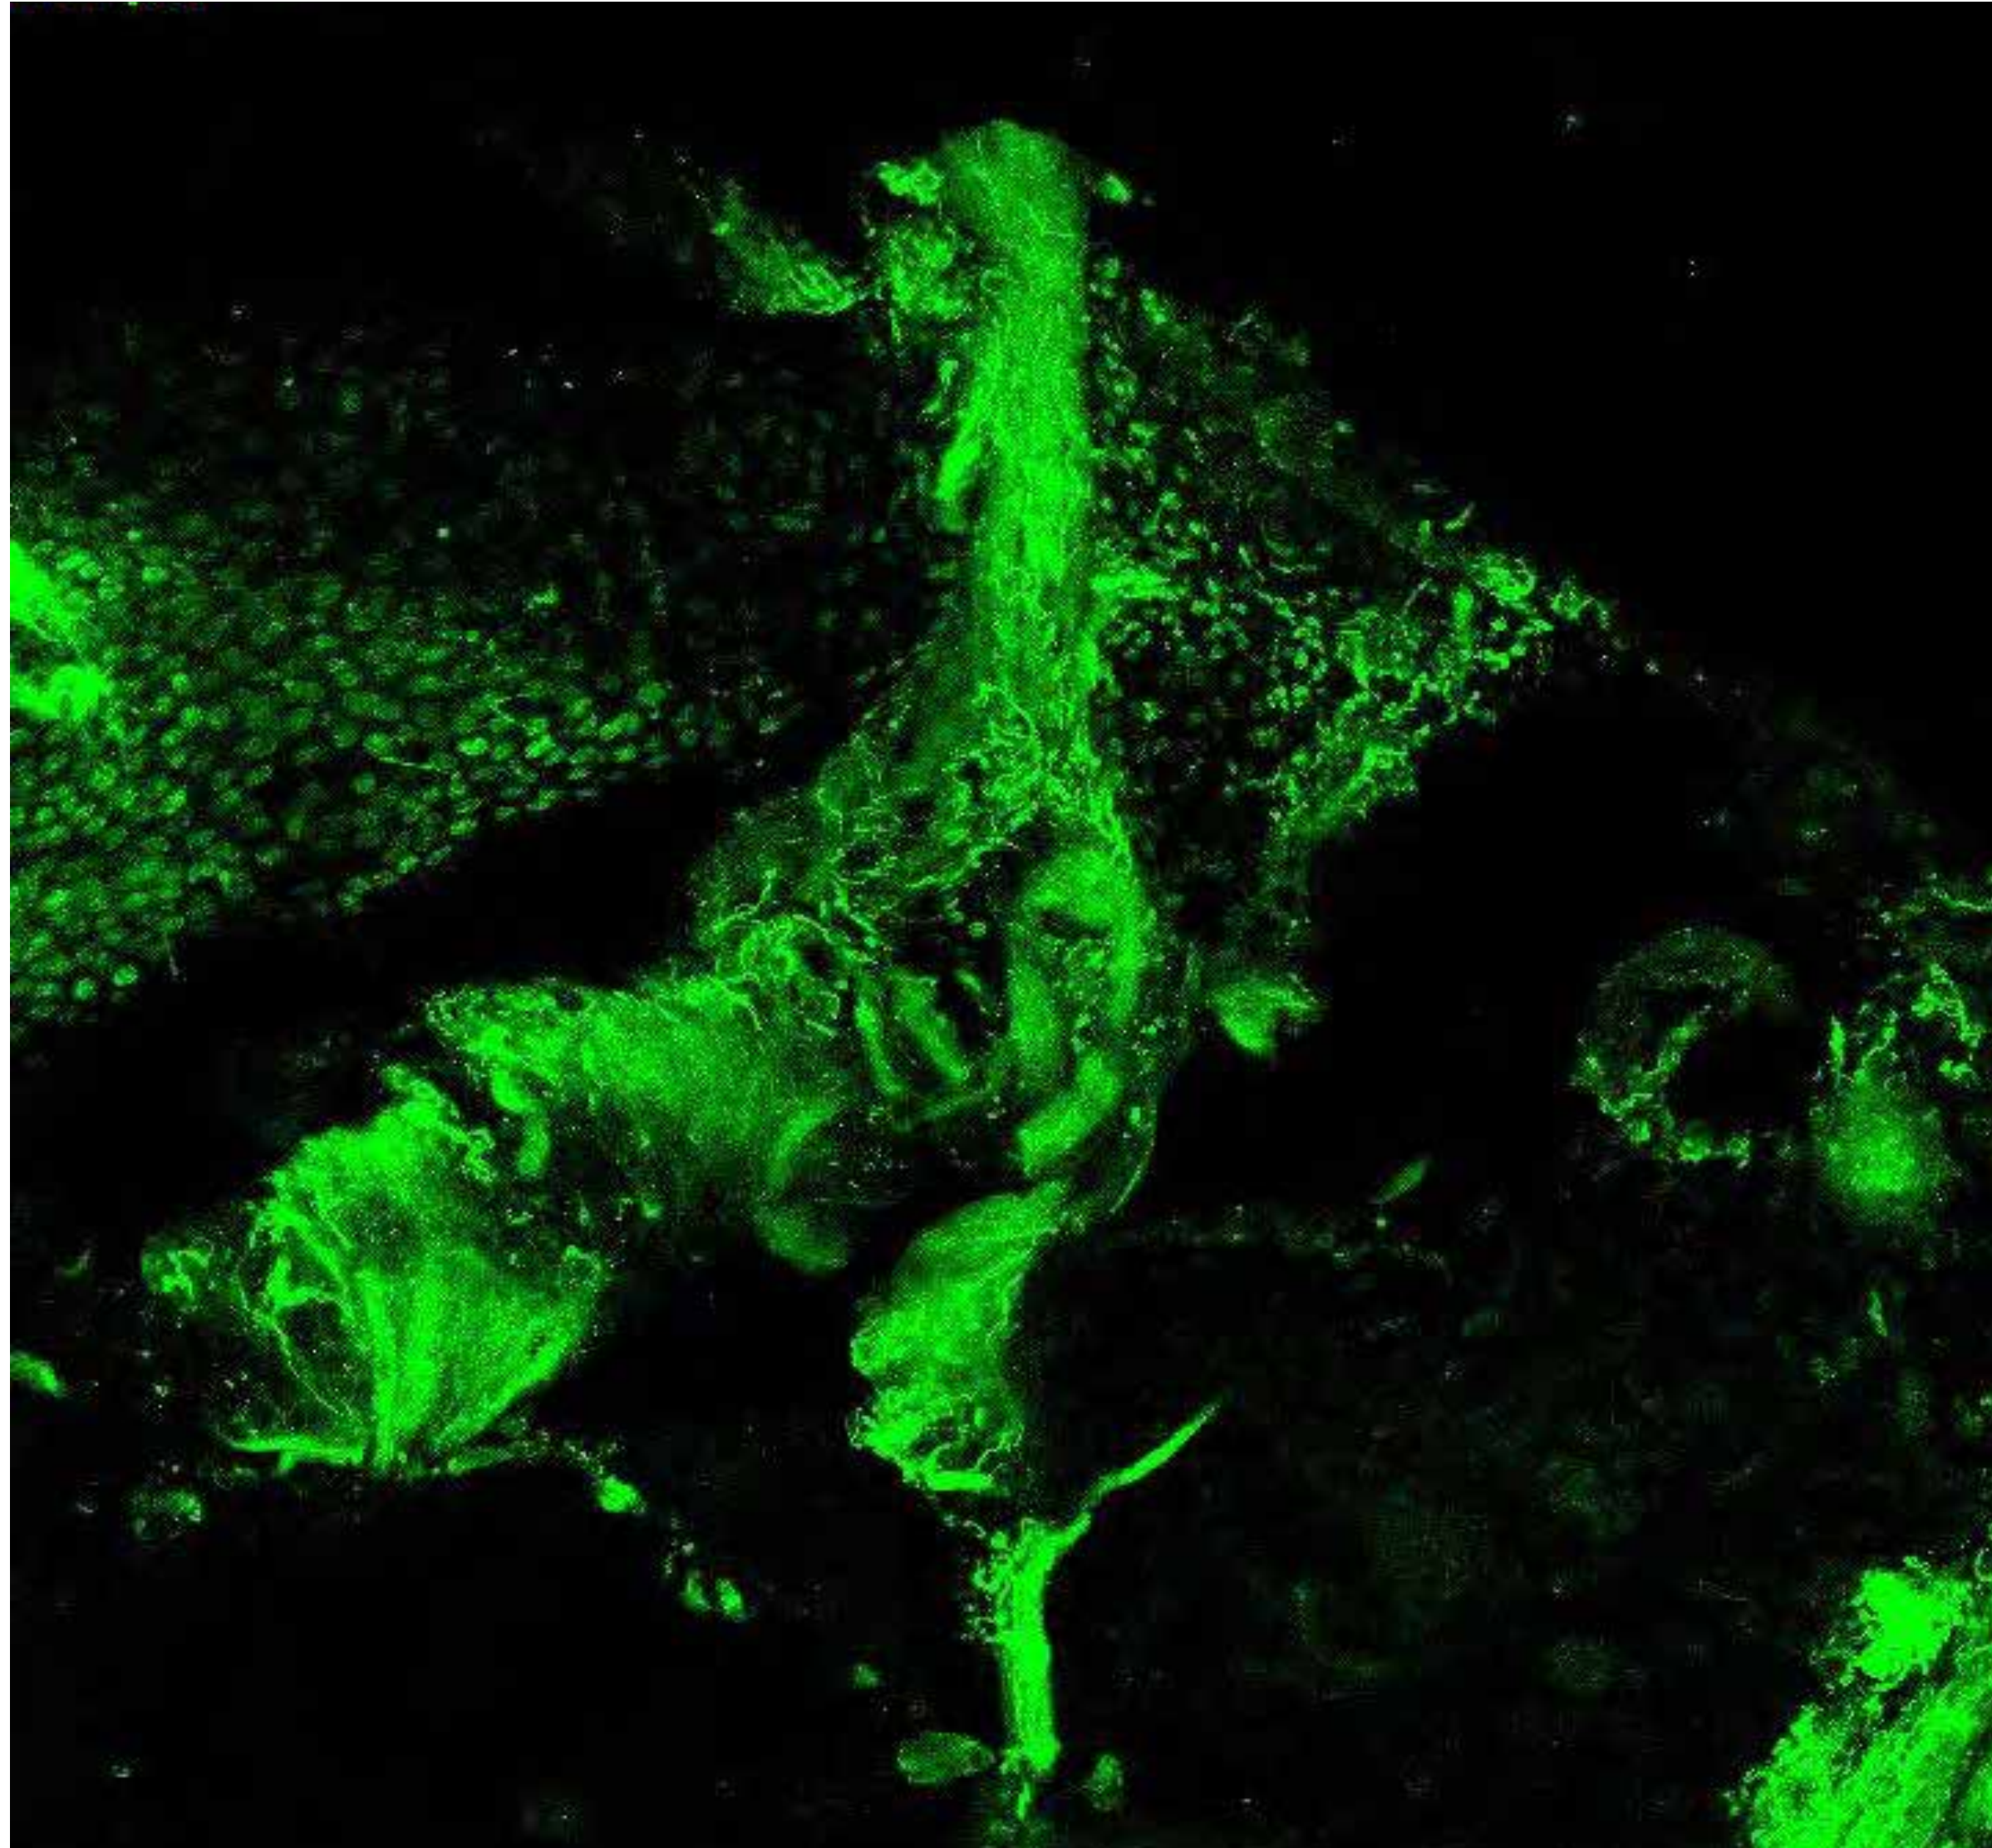

PARPi-FL only (green)

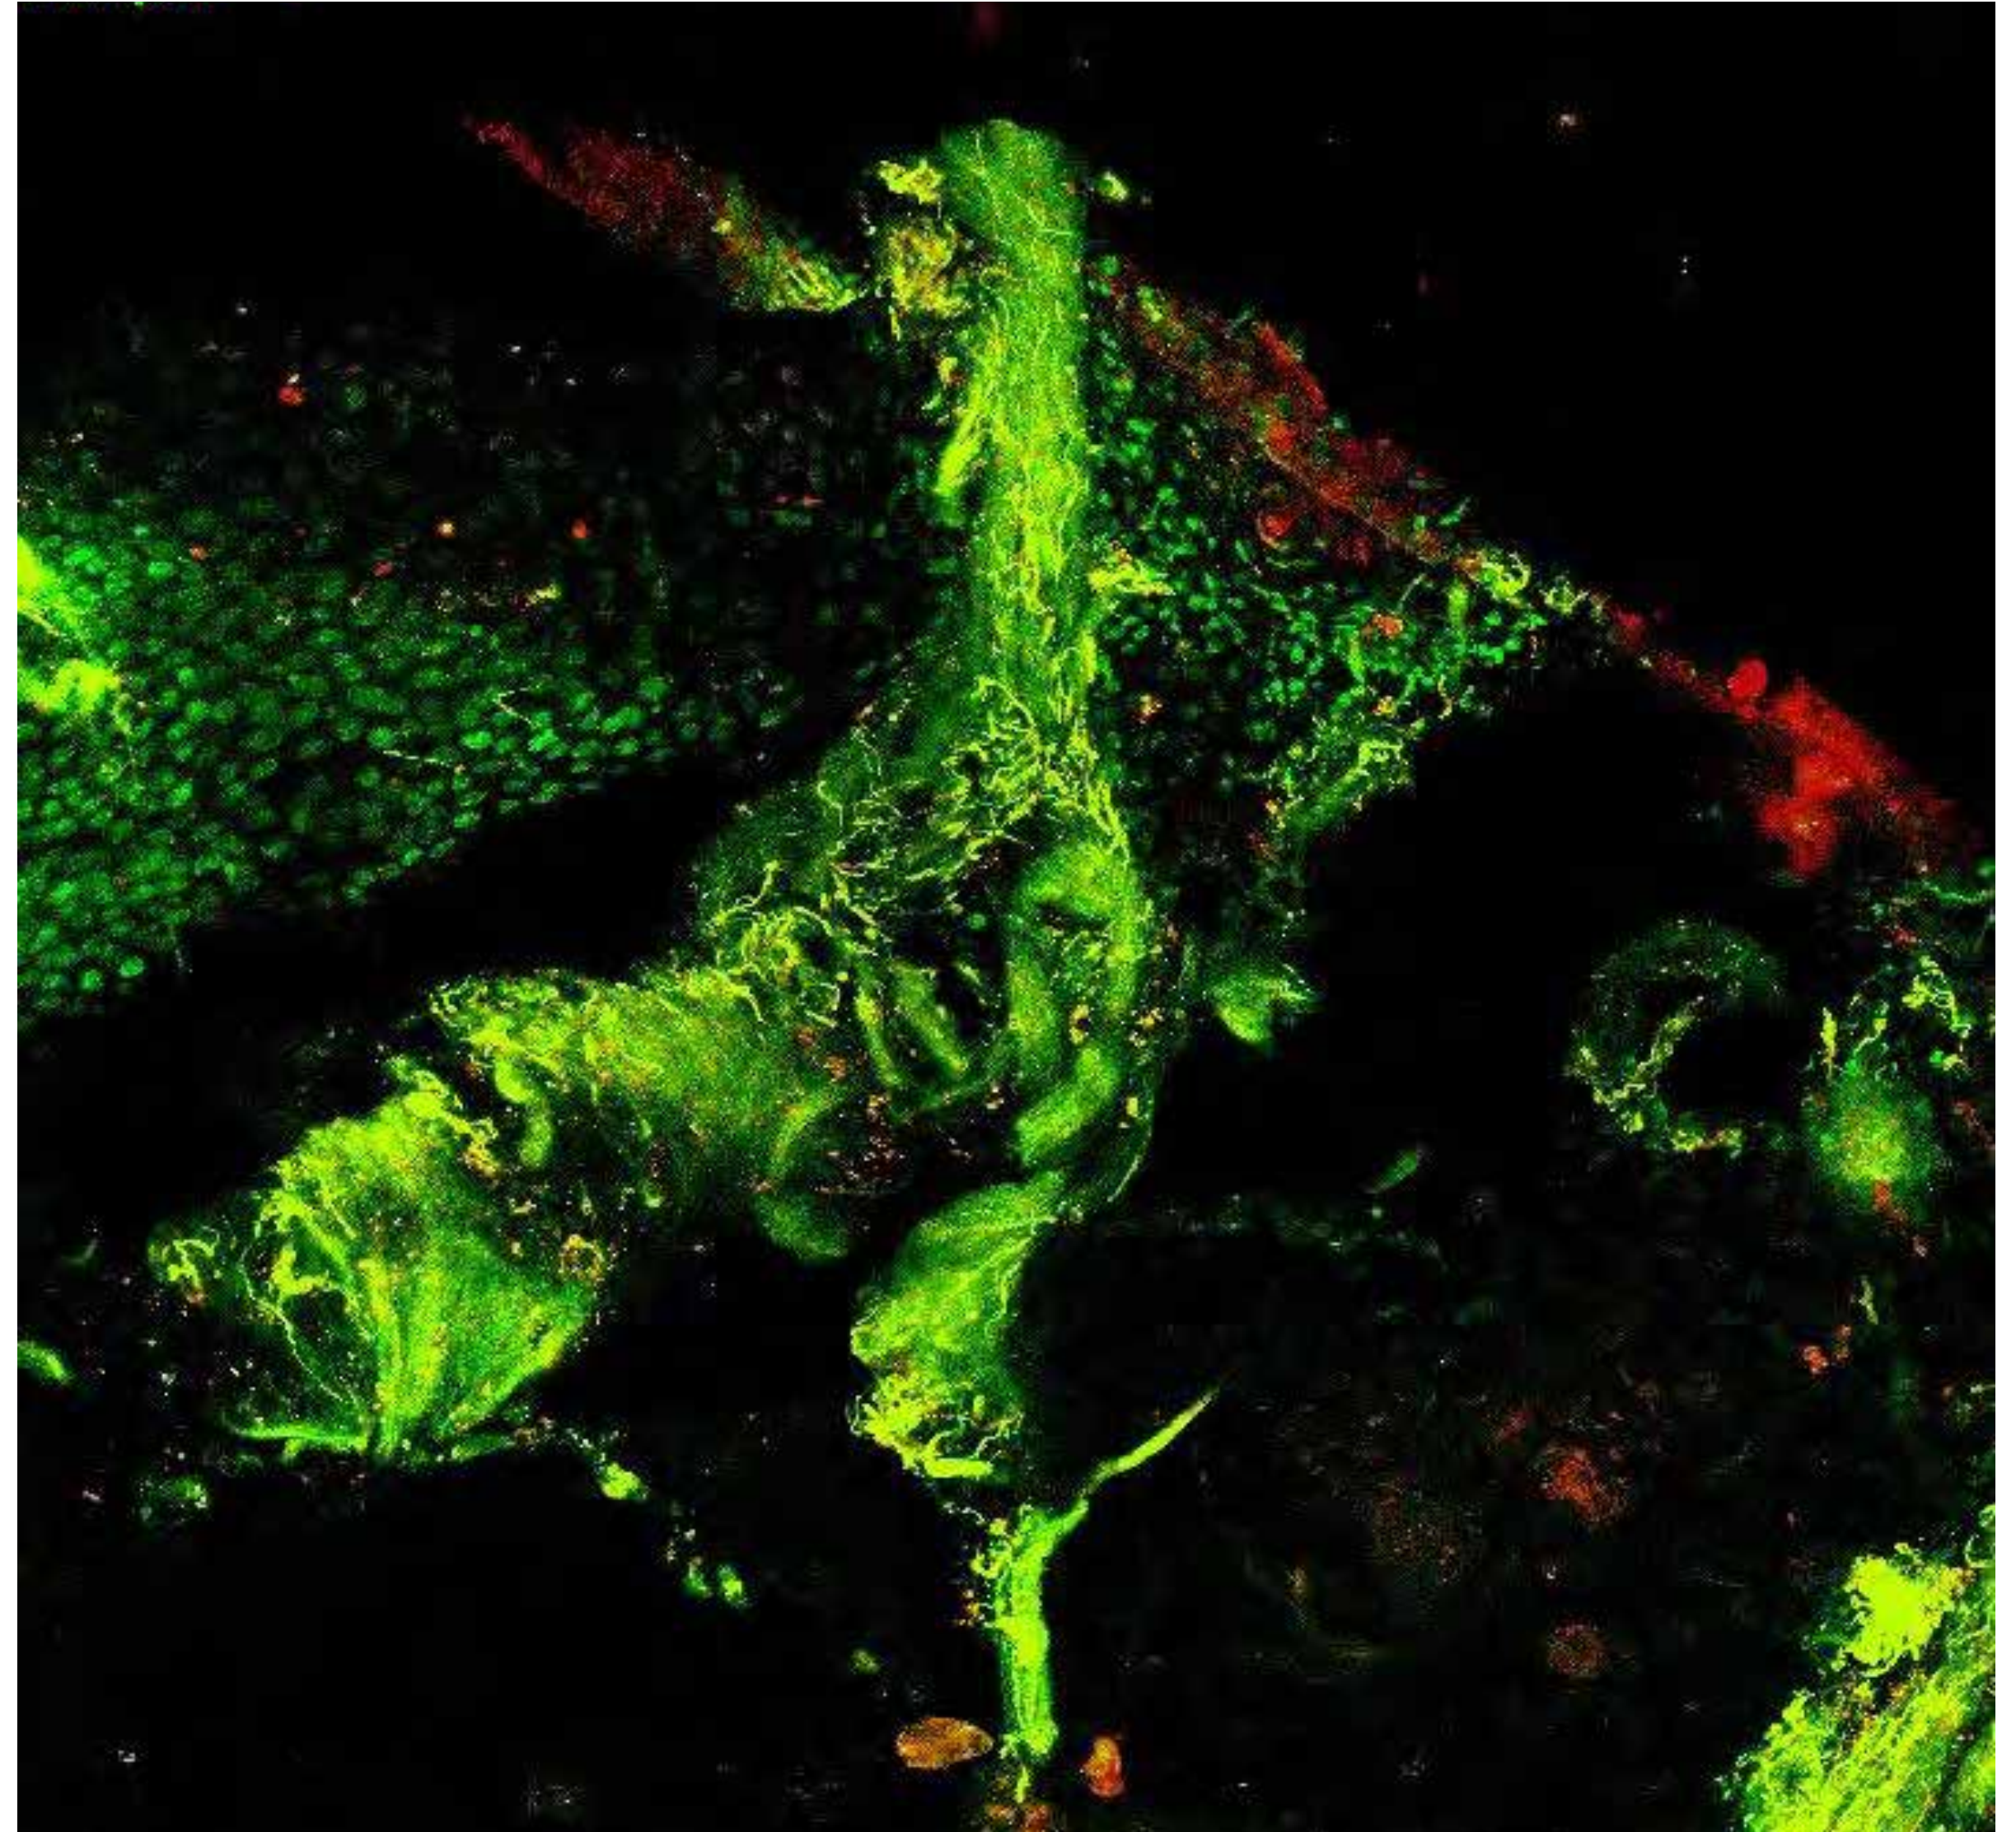

PARPi-FL (green) + Autofluorescence (red/yellow)



4574

Close-up

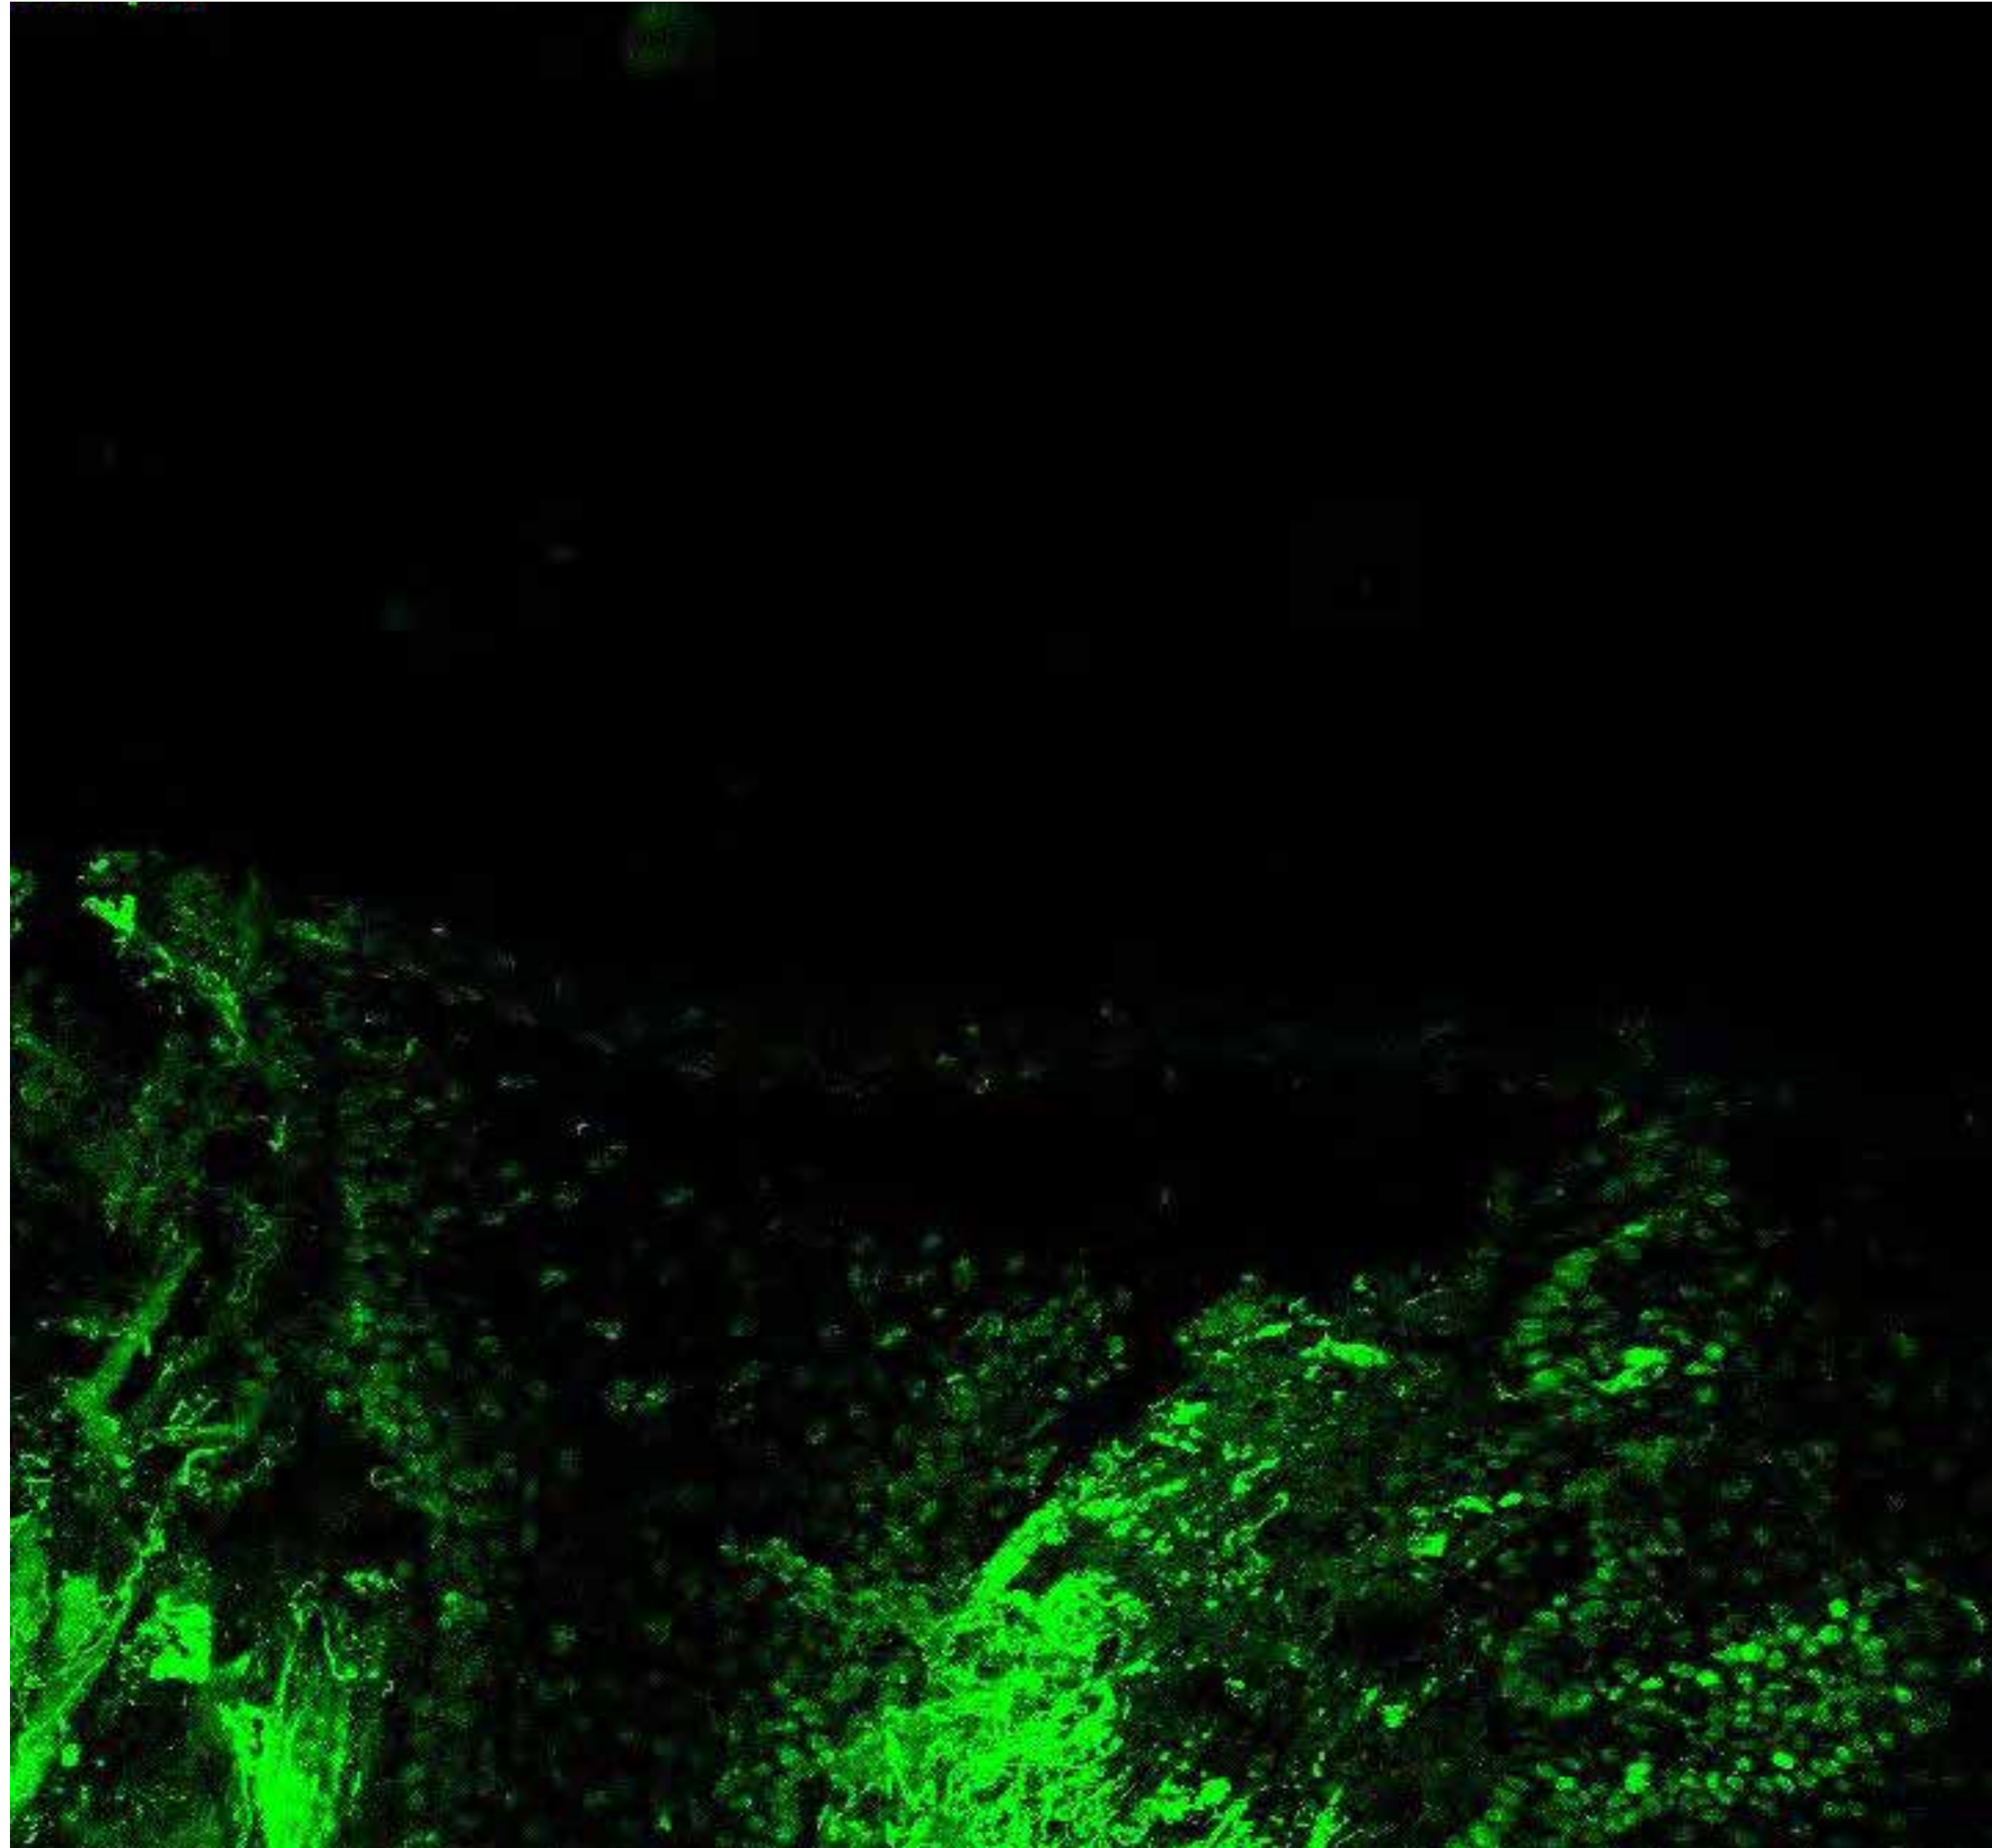

PARPi-FL only (green)

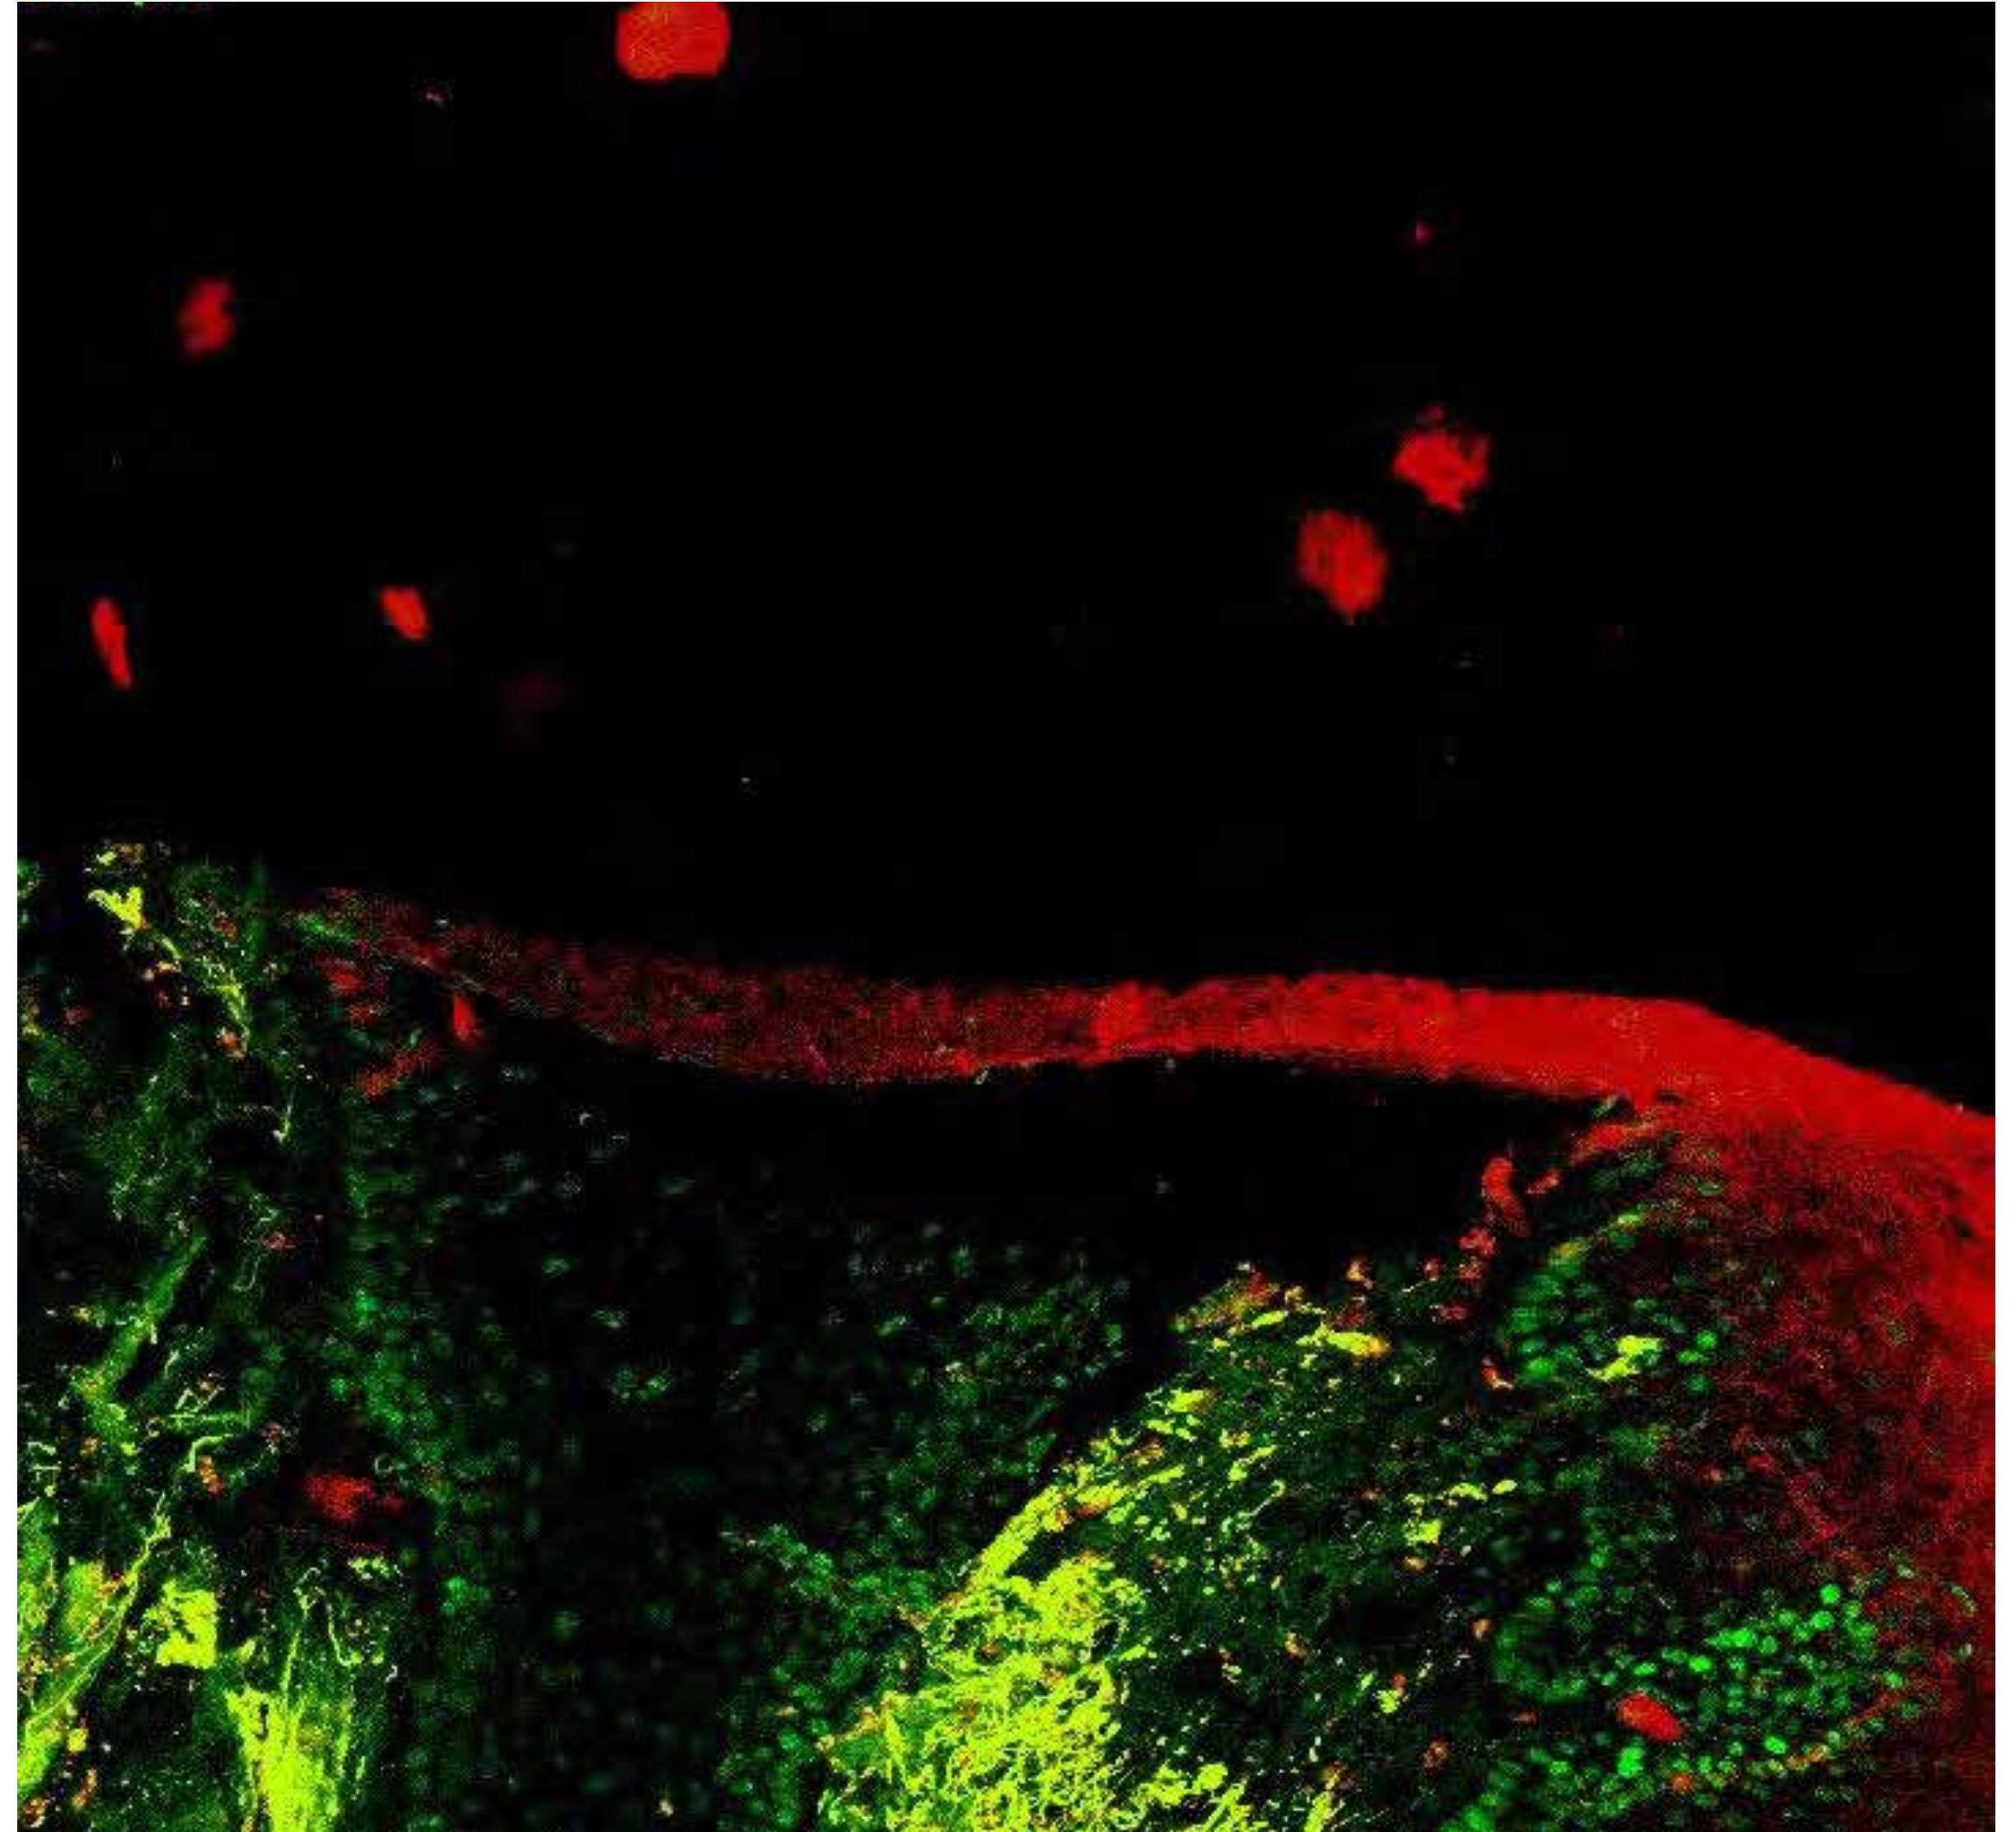

PARPi-FL (green) + Autofluorescence (red/yellow)



4574

Close-up

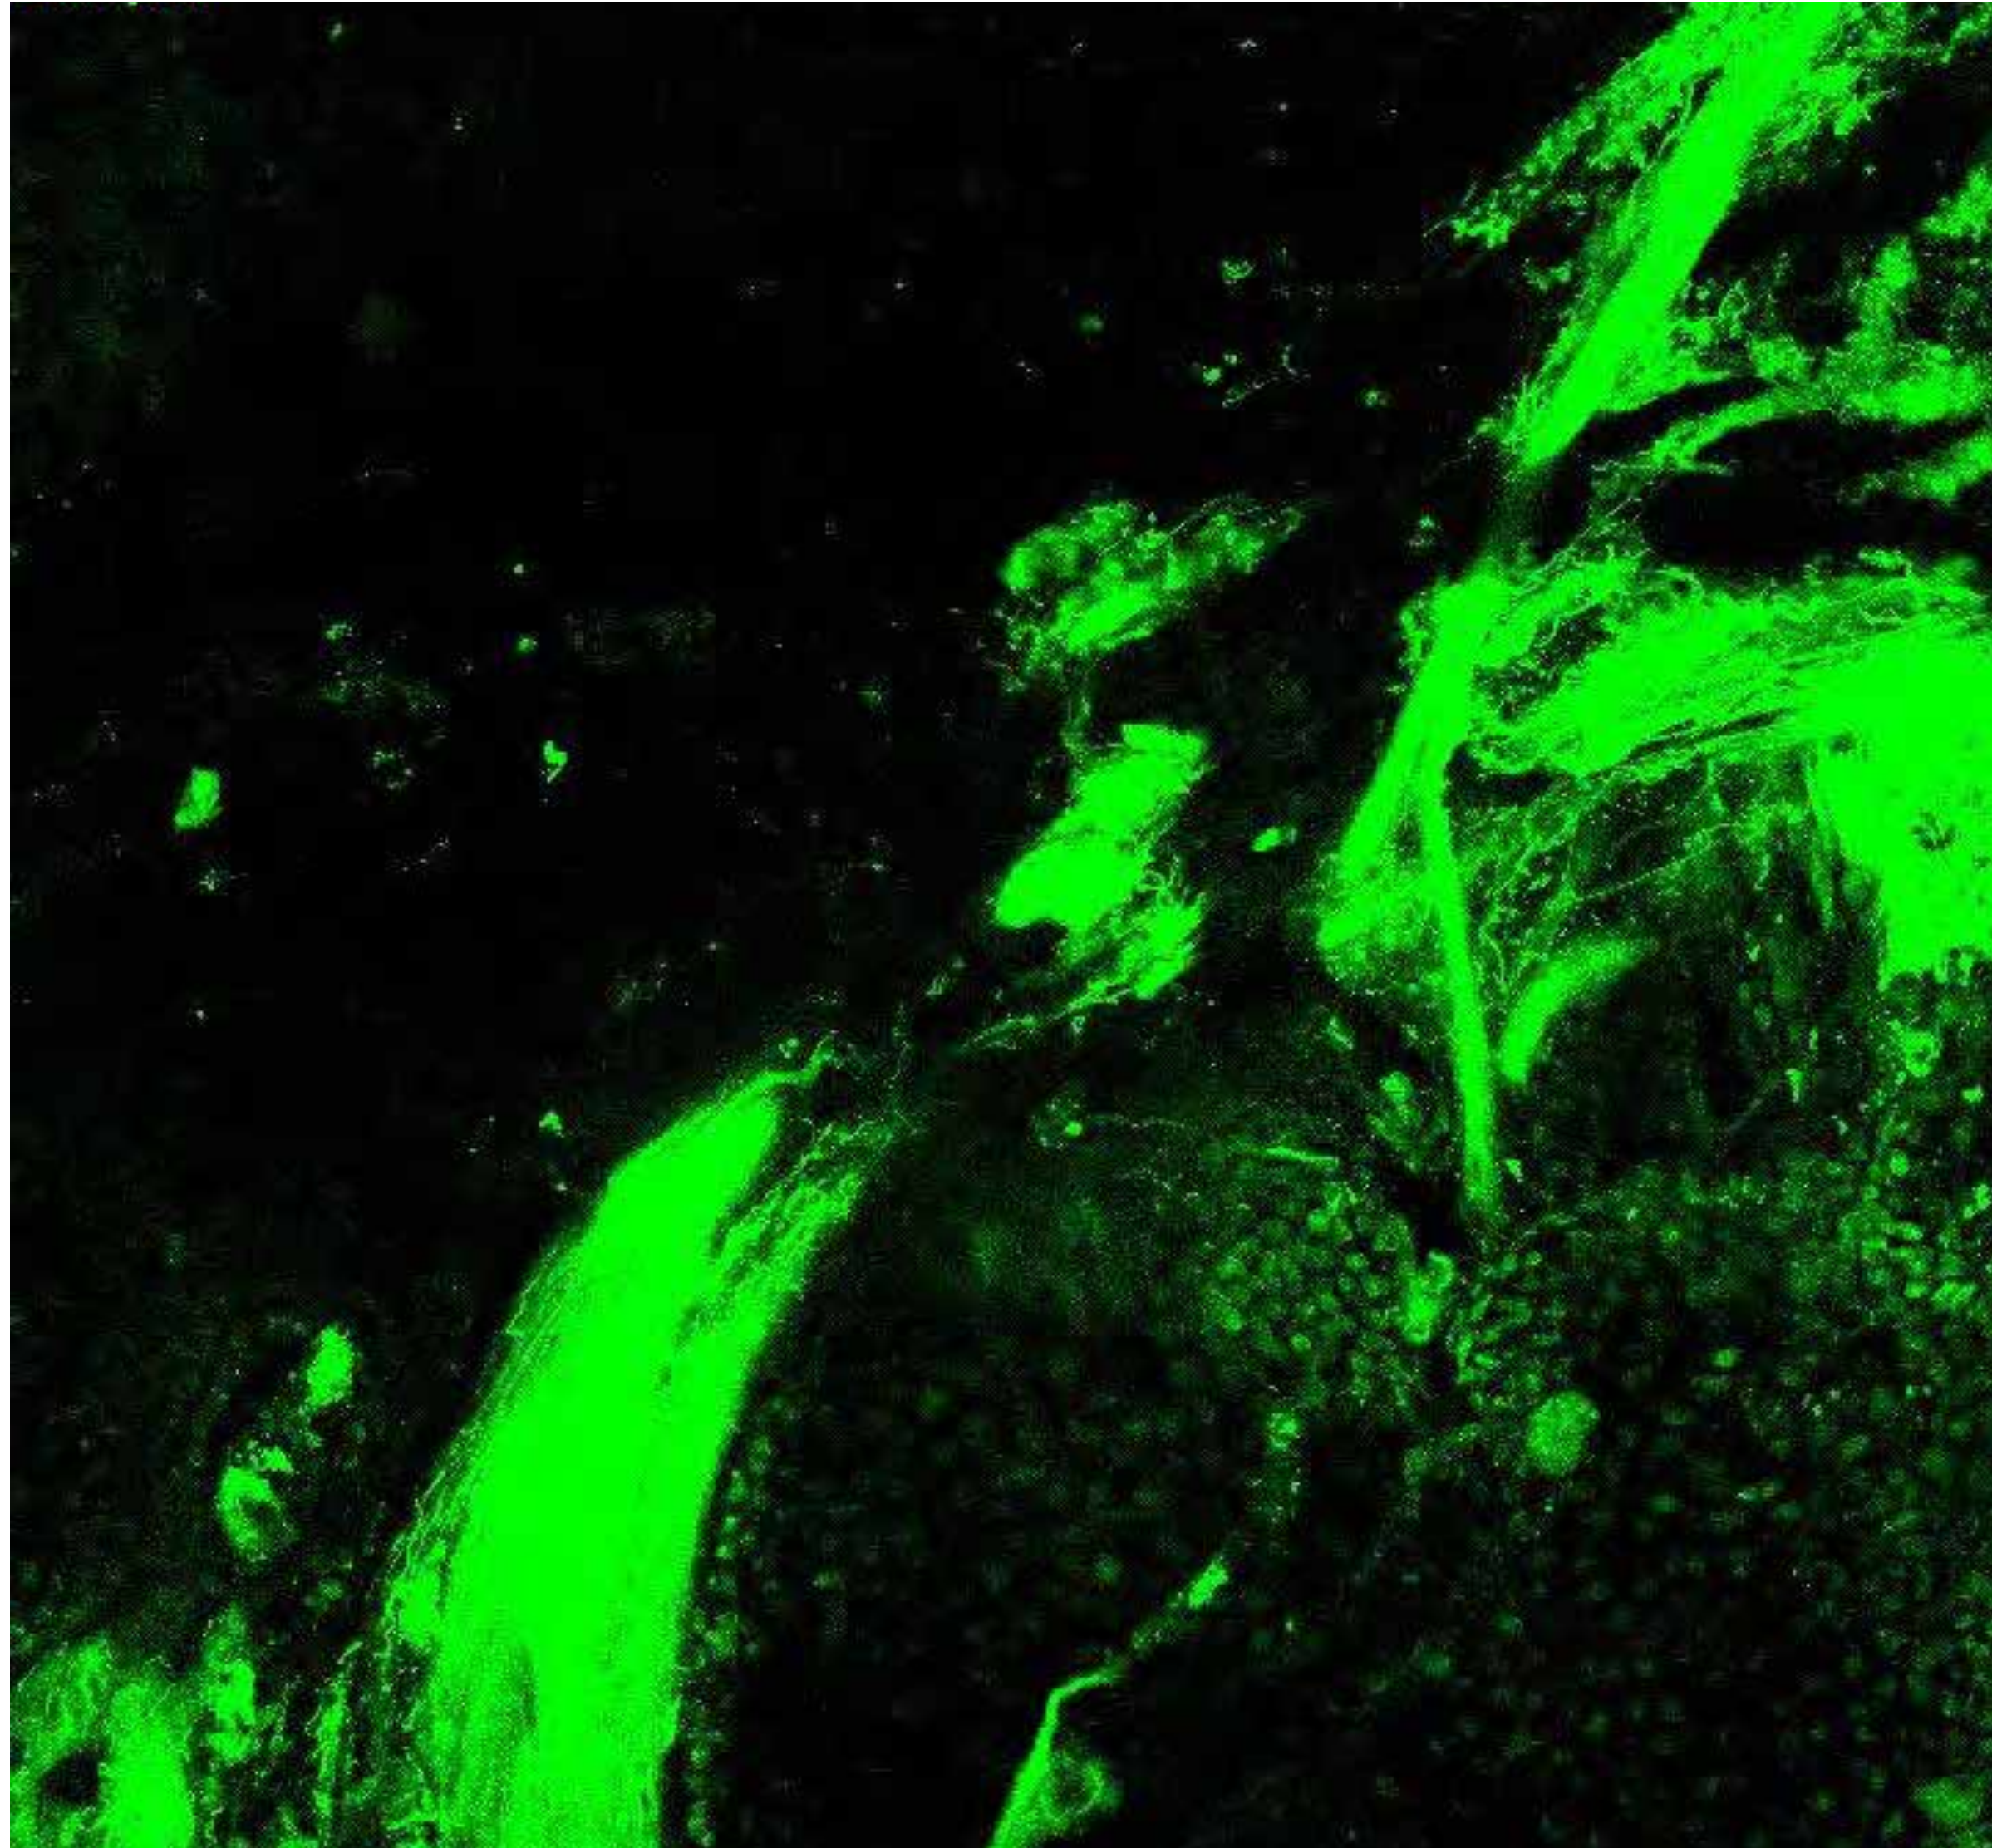

PARPi-FL only (green)

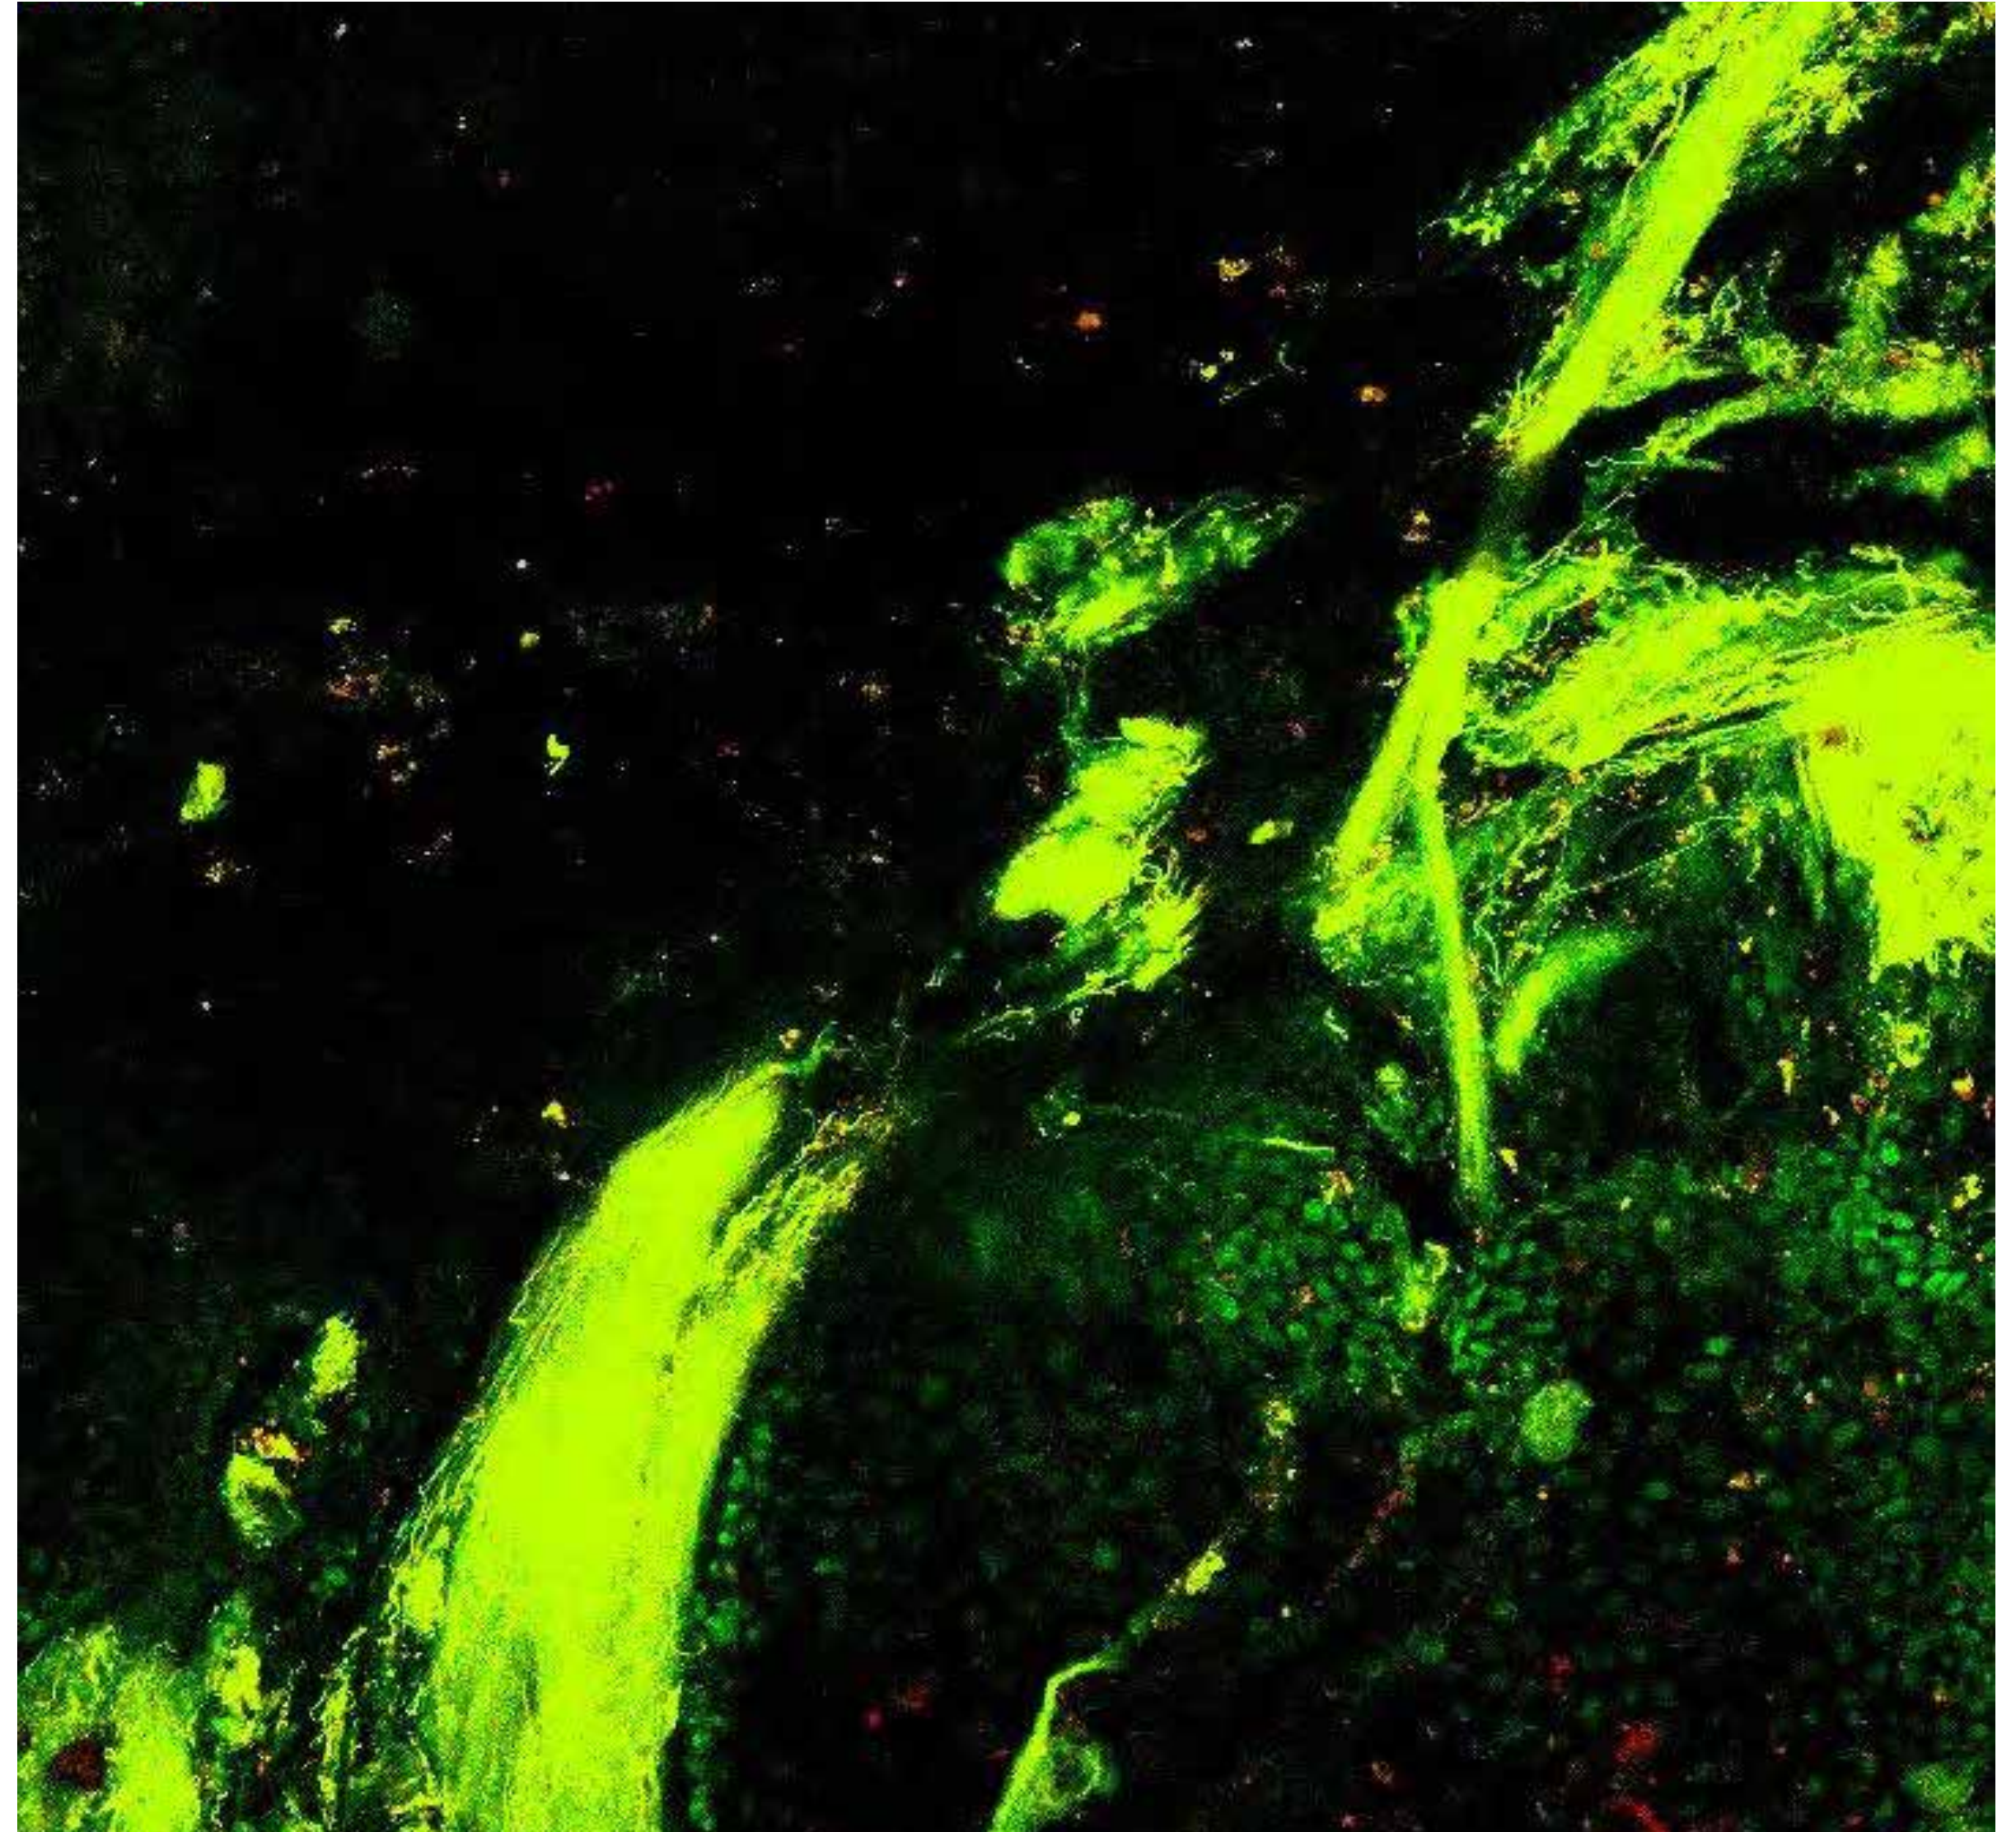

PARPi-FL (green) + Autofluorescence (red/yellow)



4574

Close-up

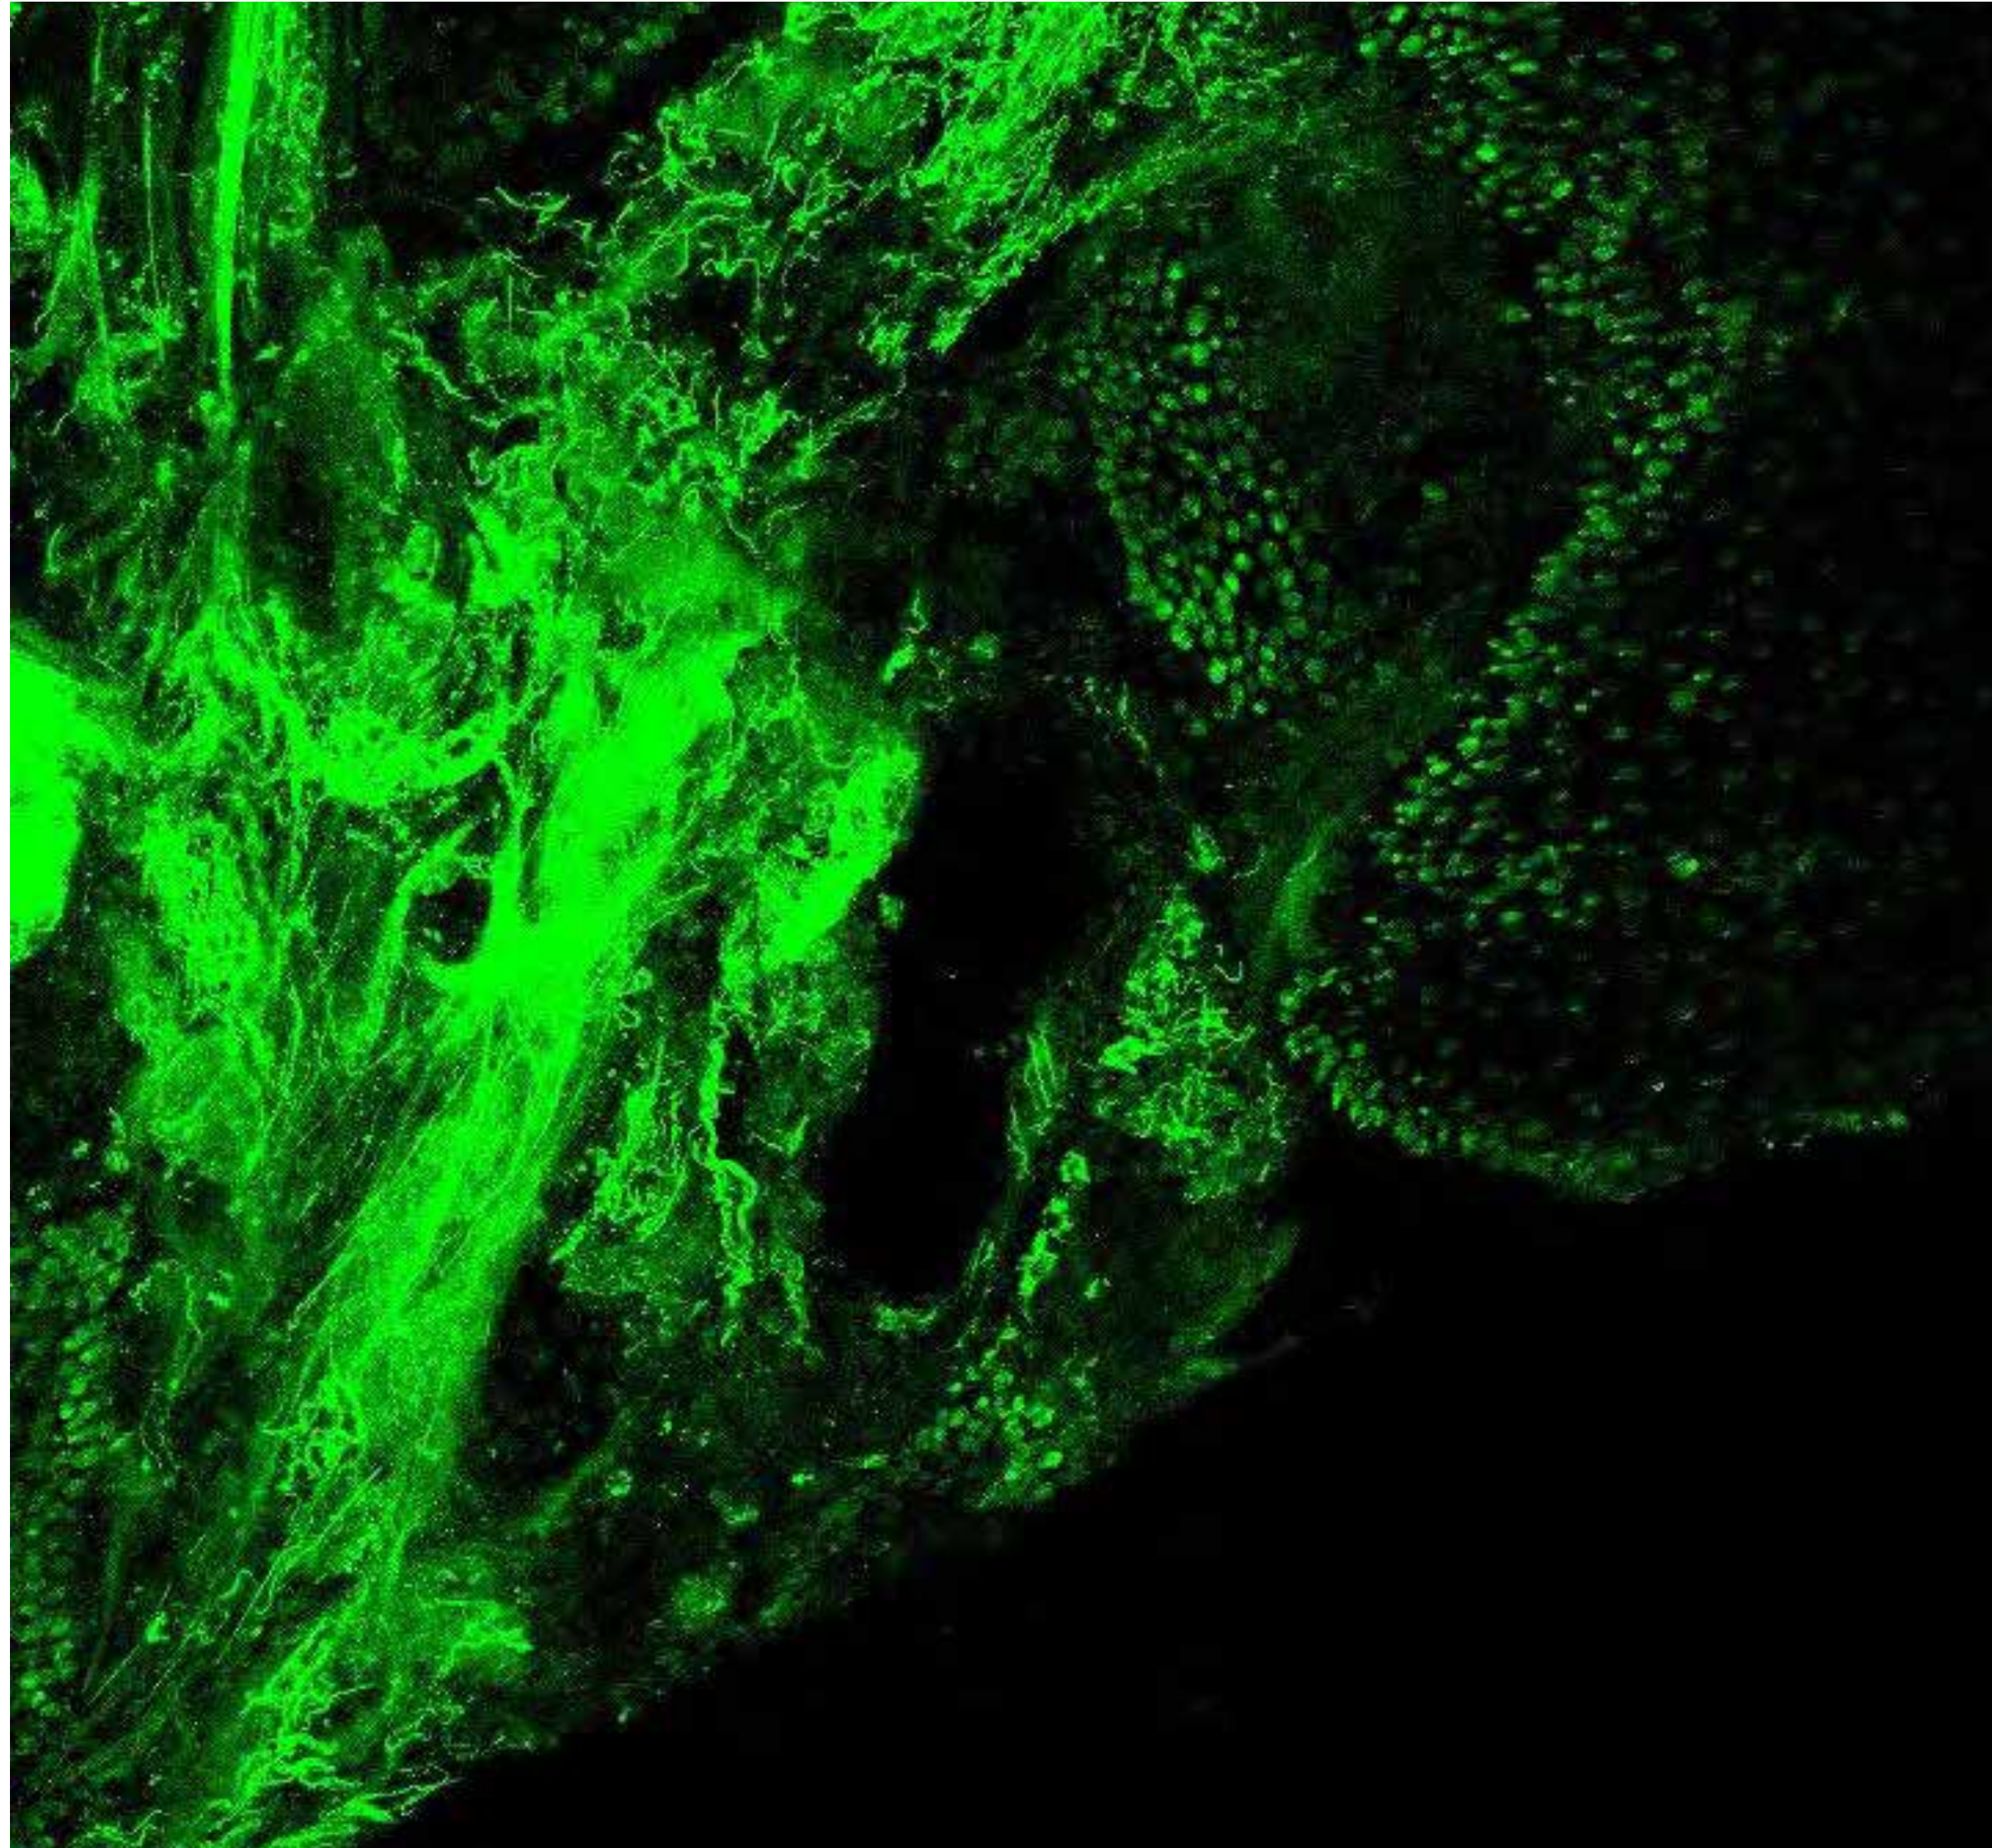

PARPi-FL only (green)

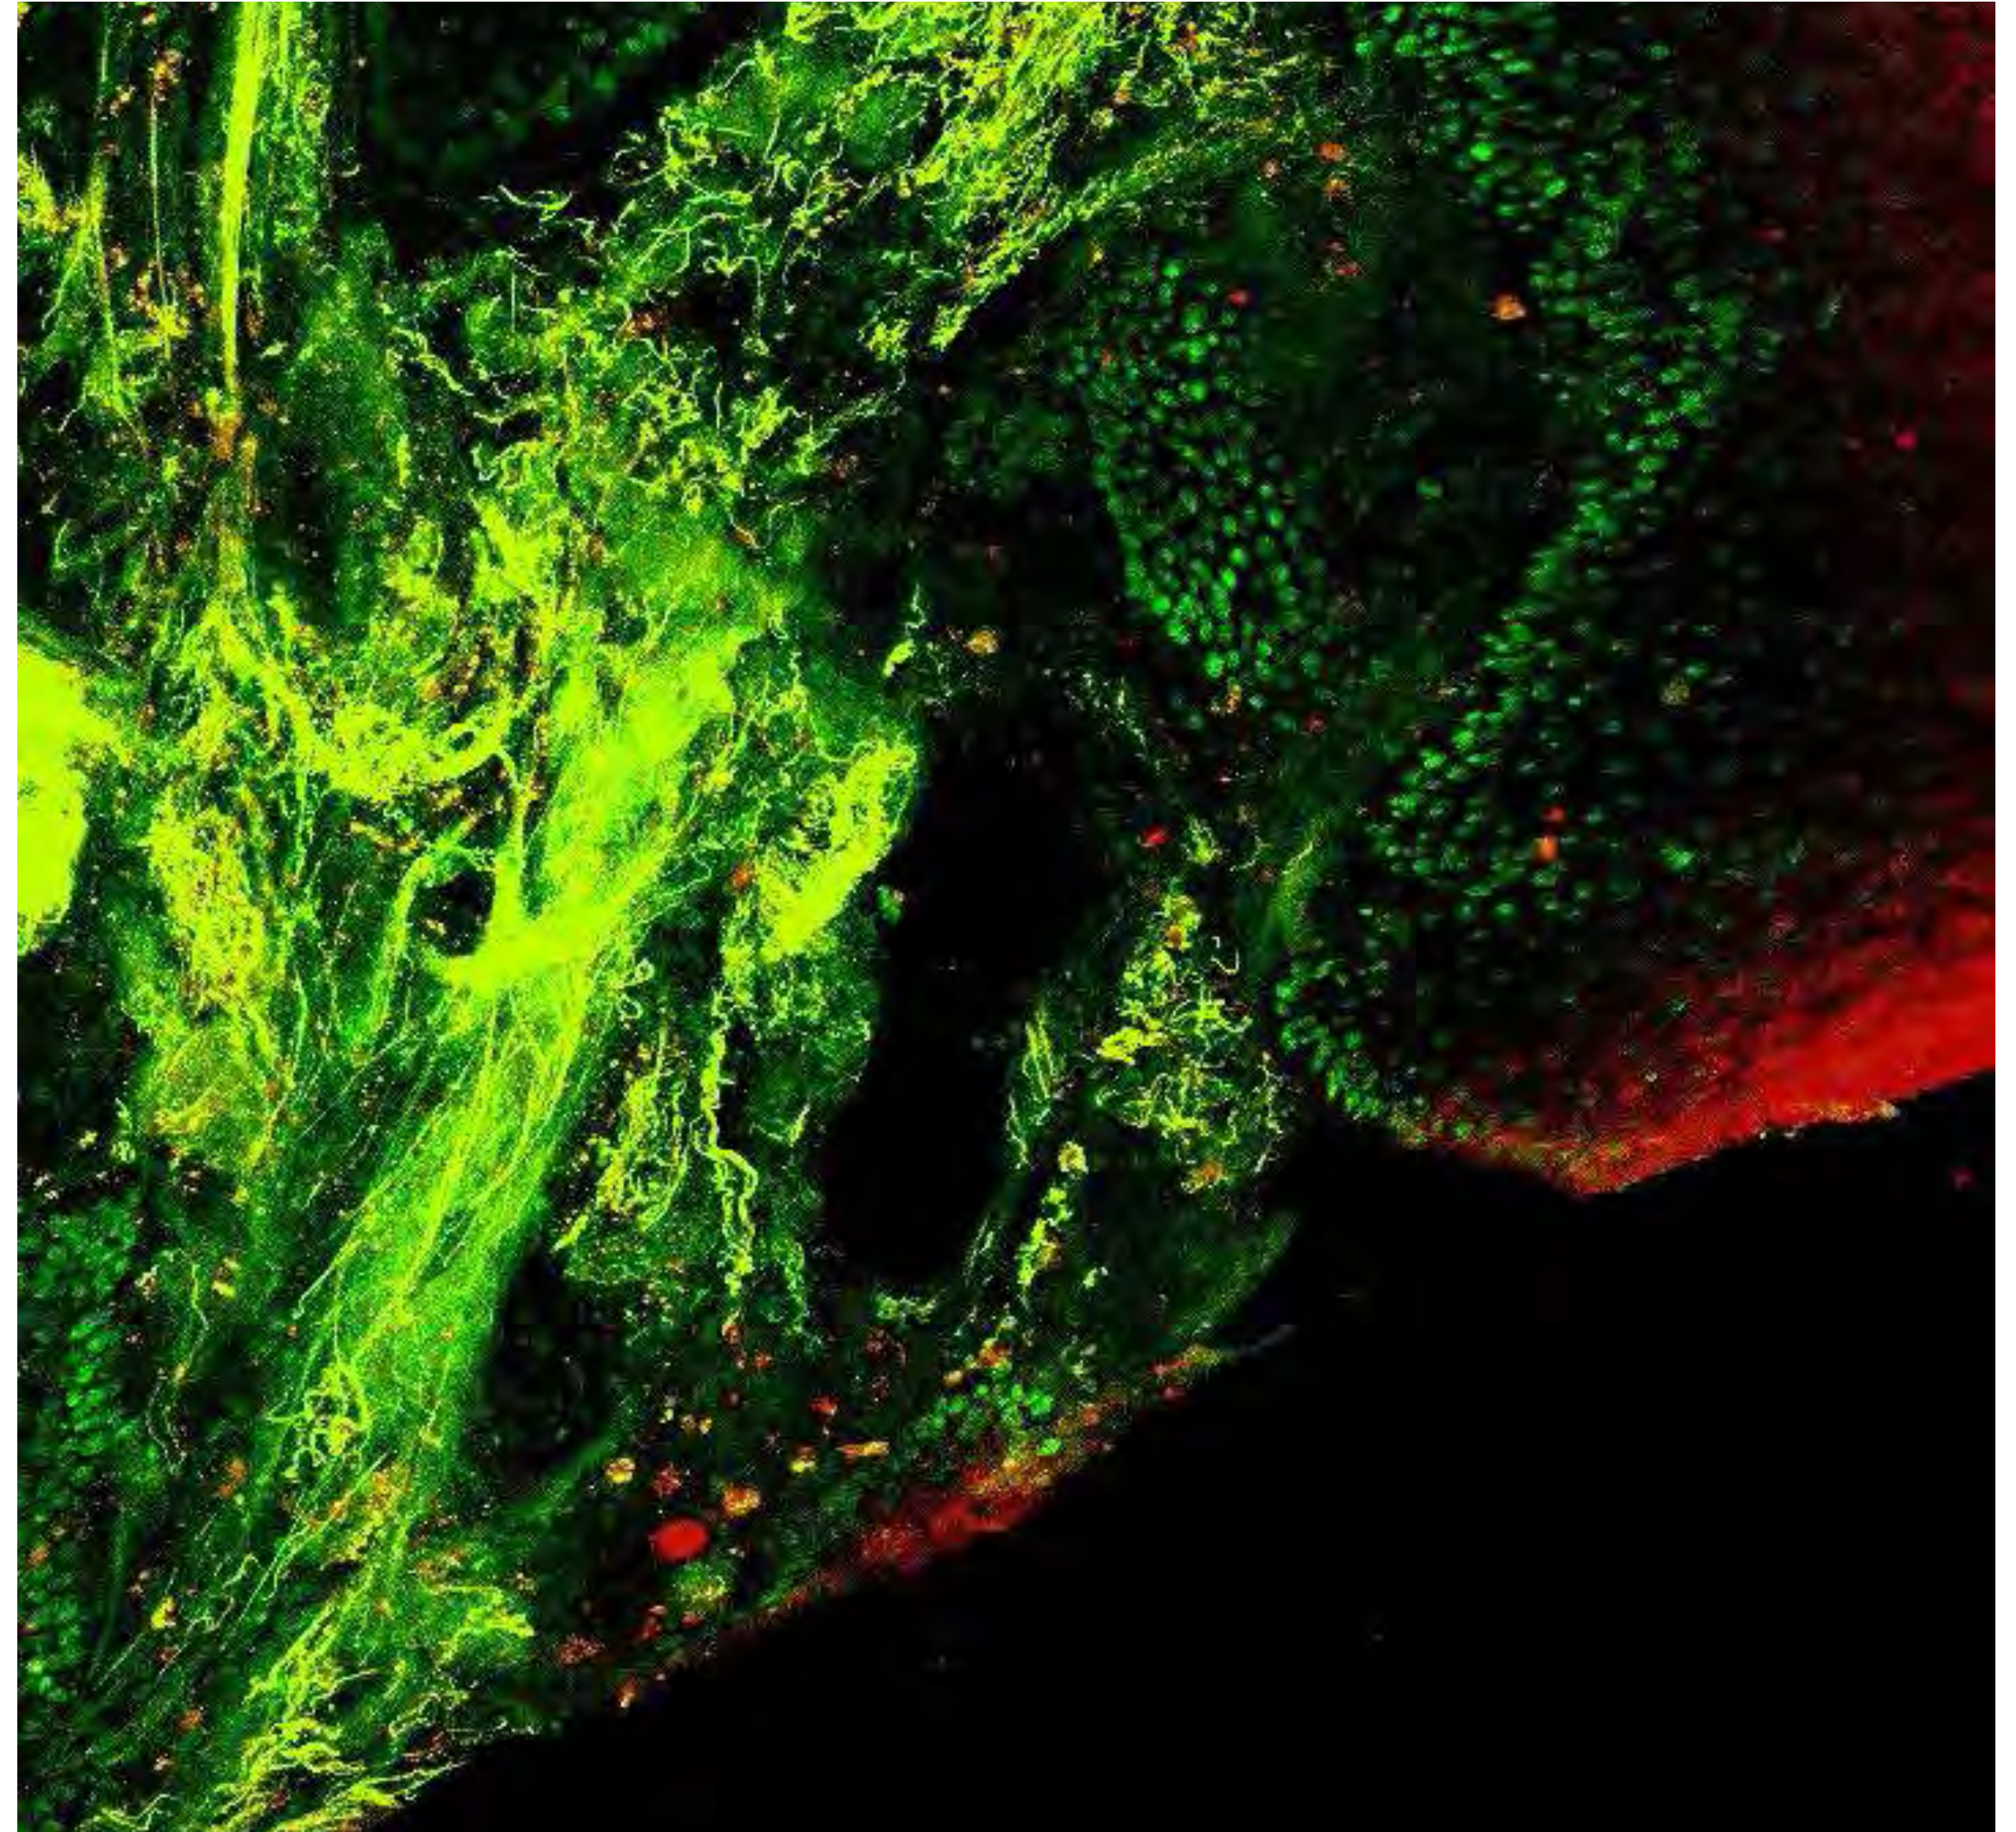

PARPi-FL (green) + Autofluorescence (red/yellow)



4574

10

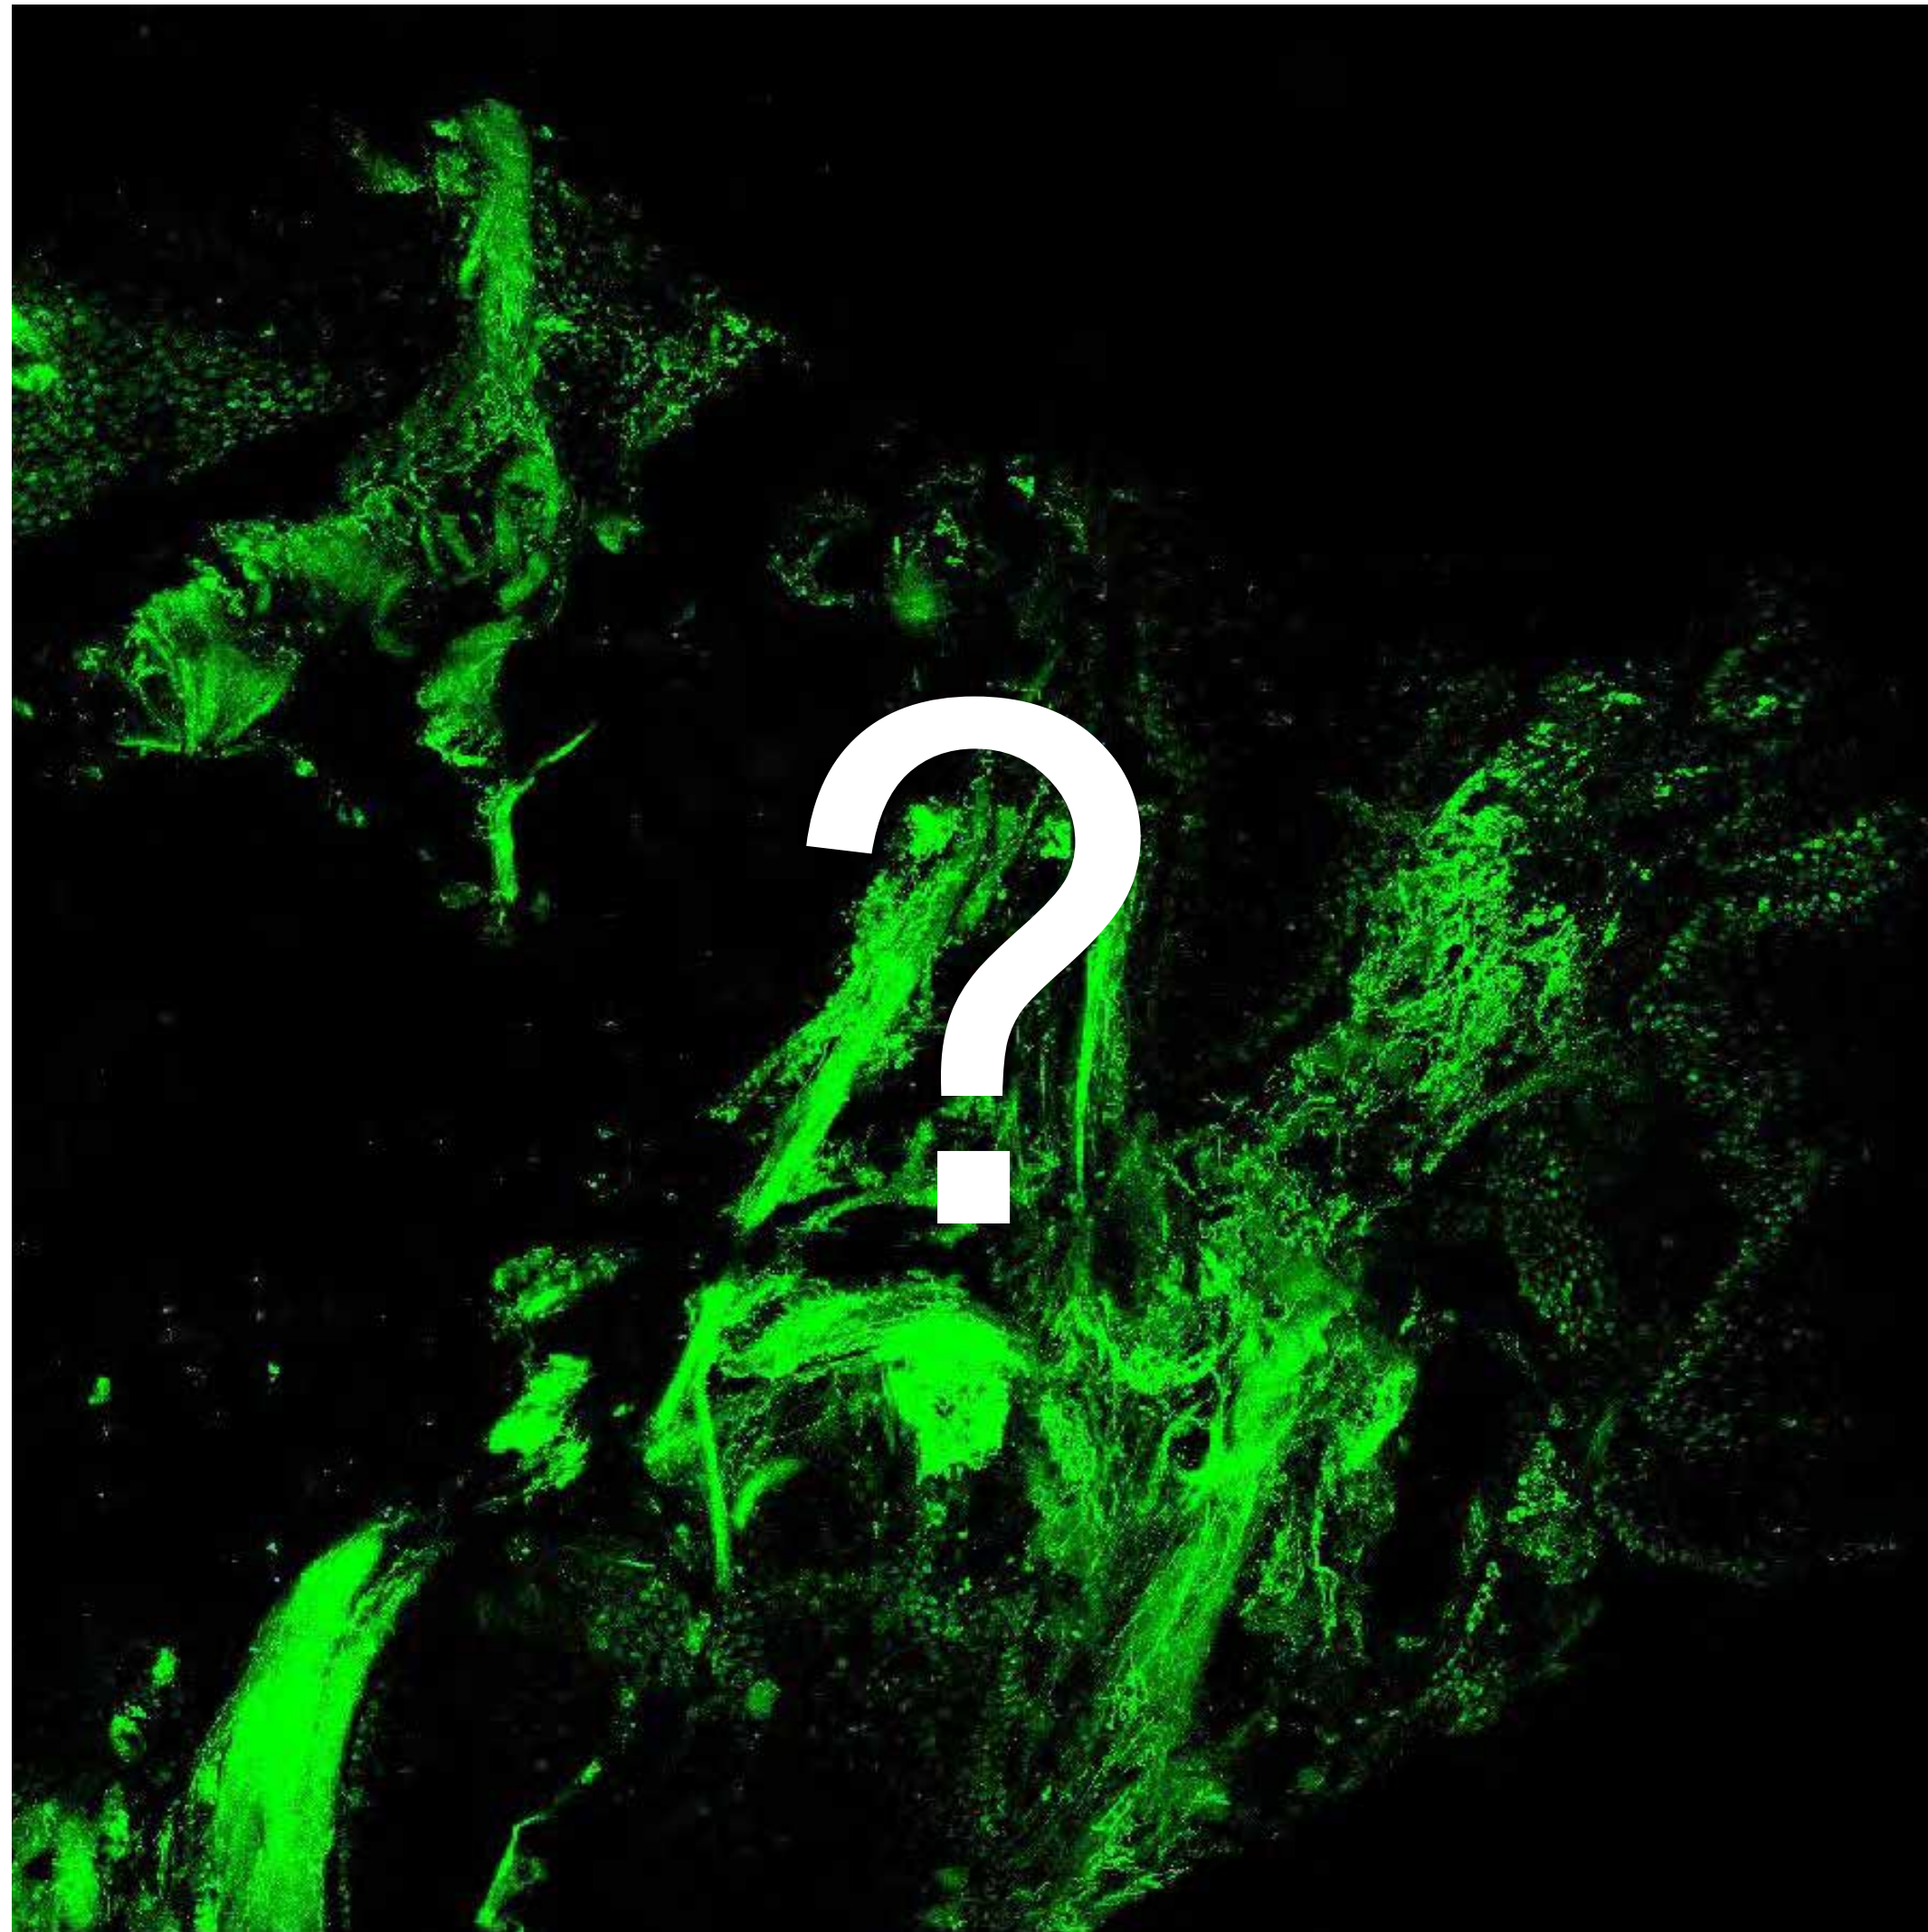

Tumor

Margin



5347

# Overview

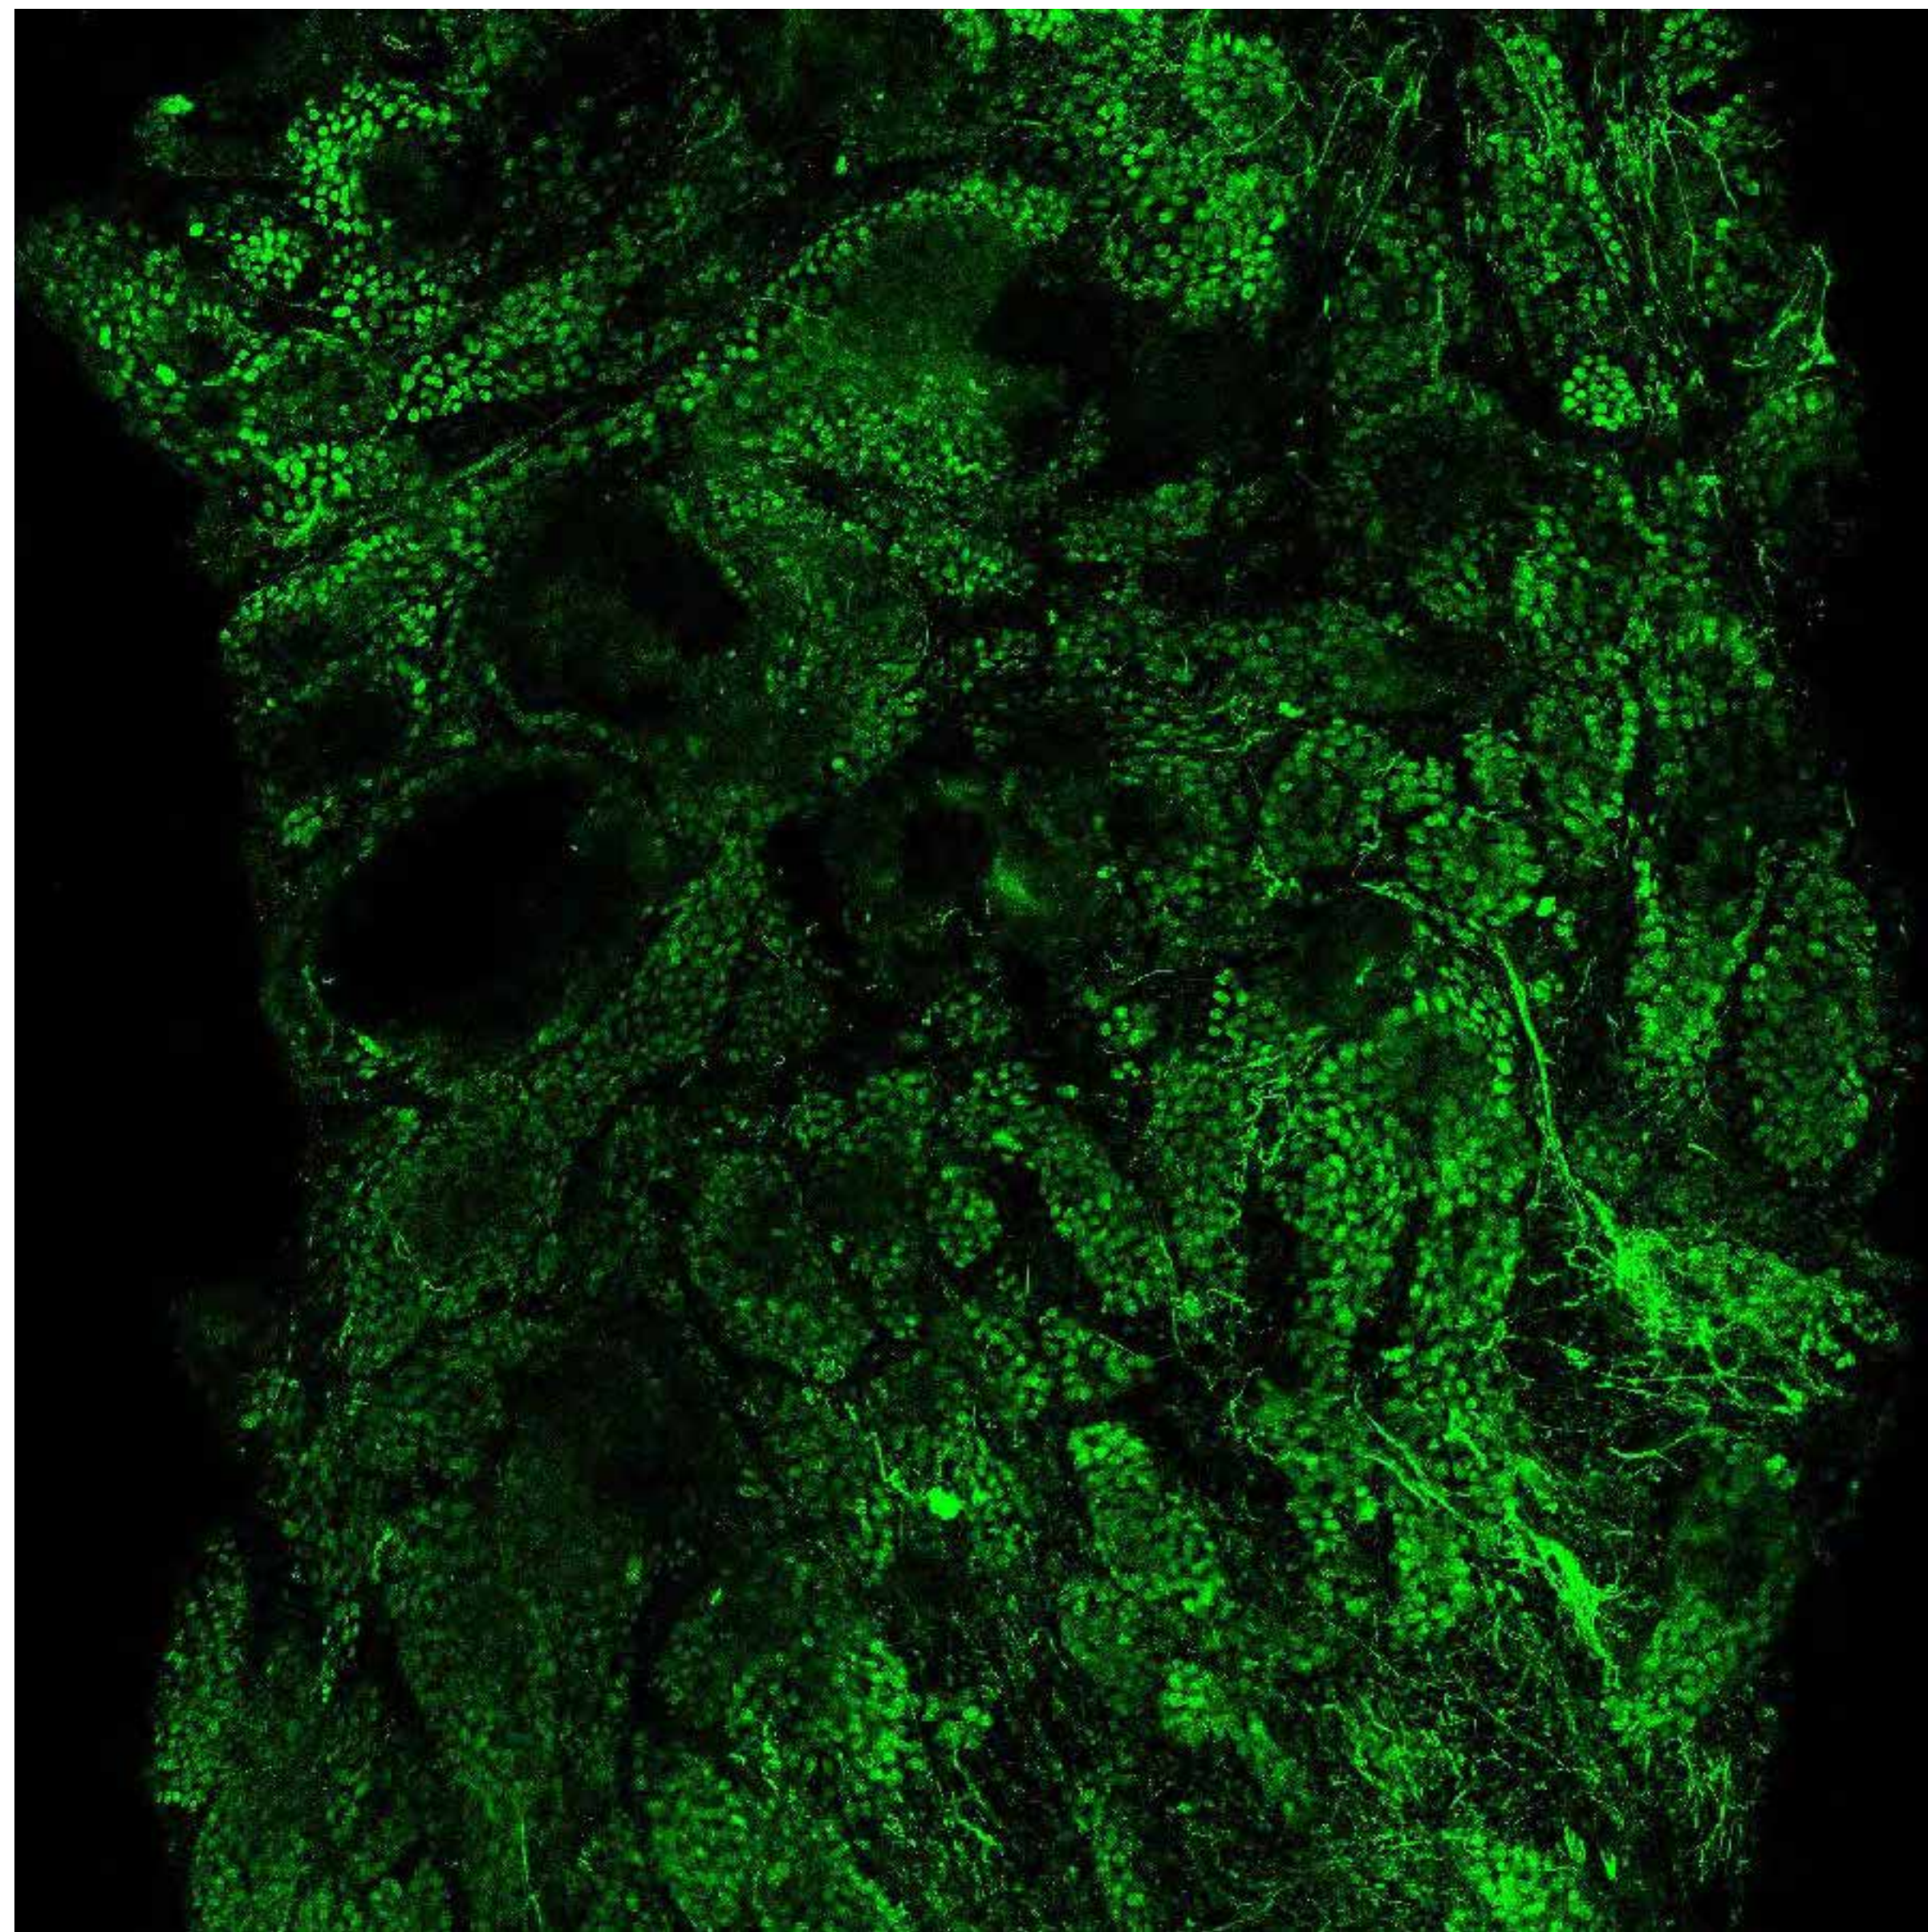

PARPi-FL only (green)

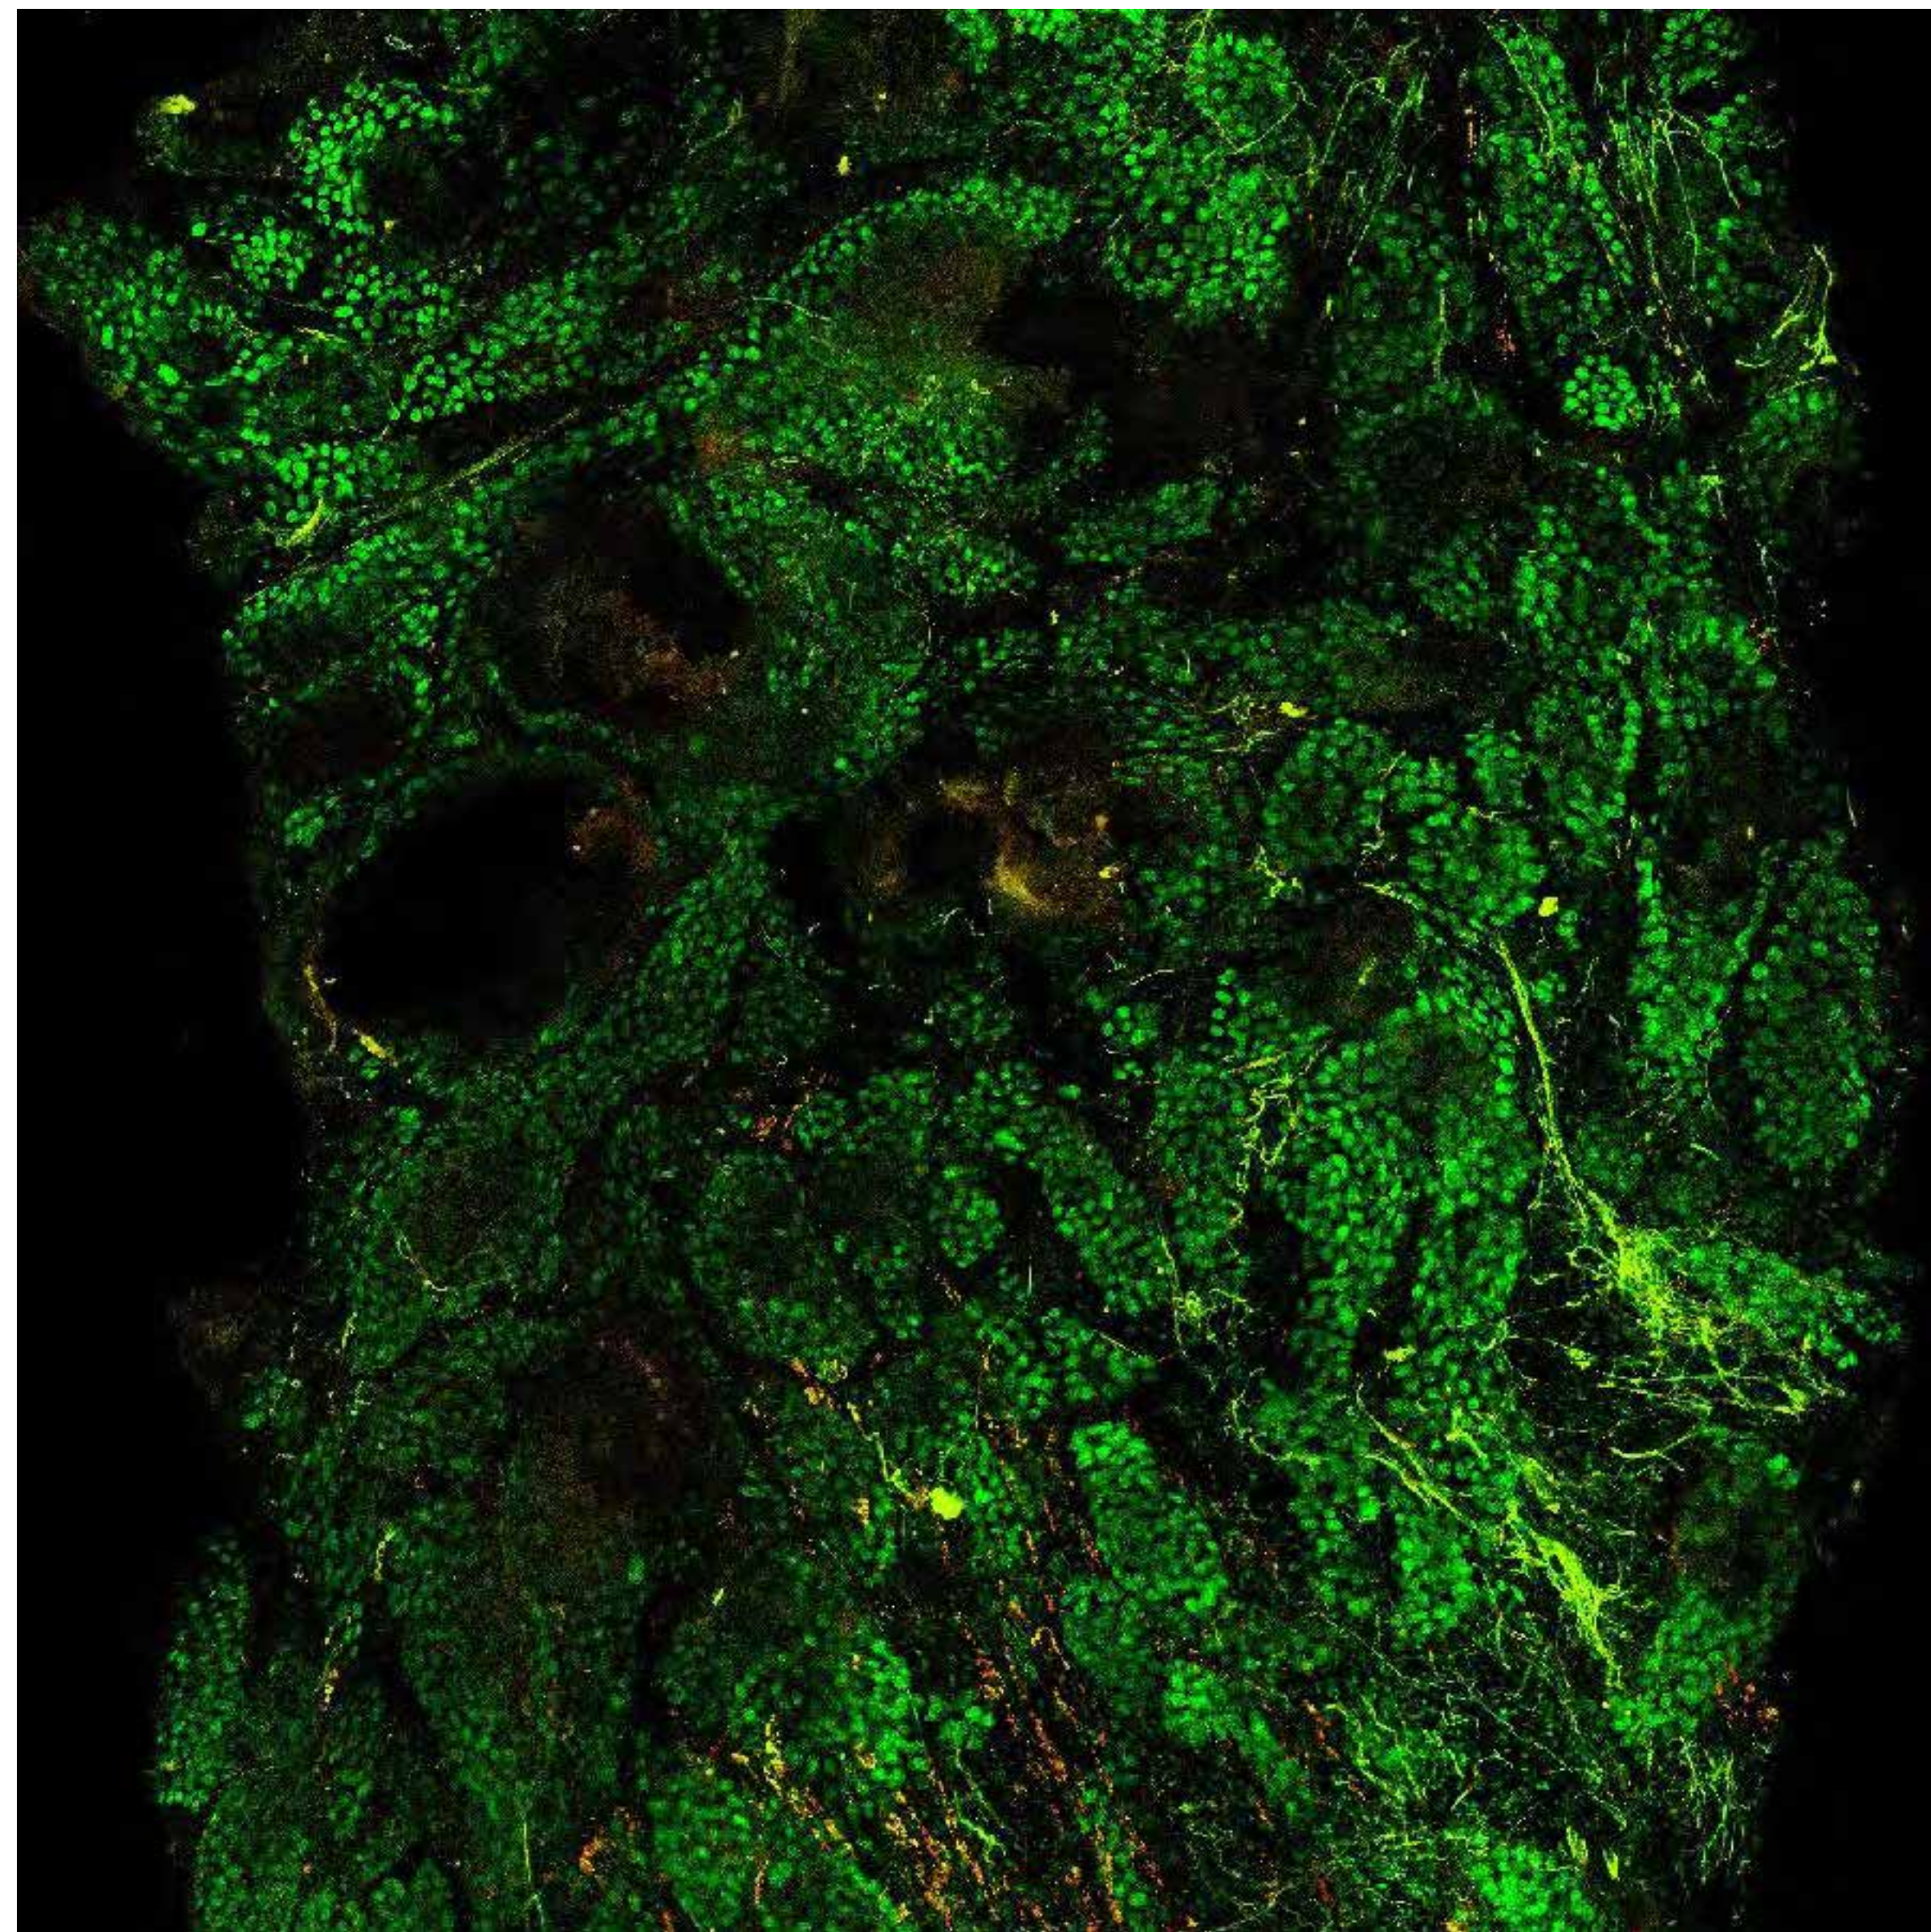

PARPi-FL (green) + Autofluorescence (red/yellow)



5347

Close-up

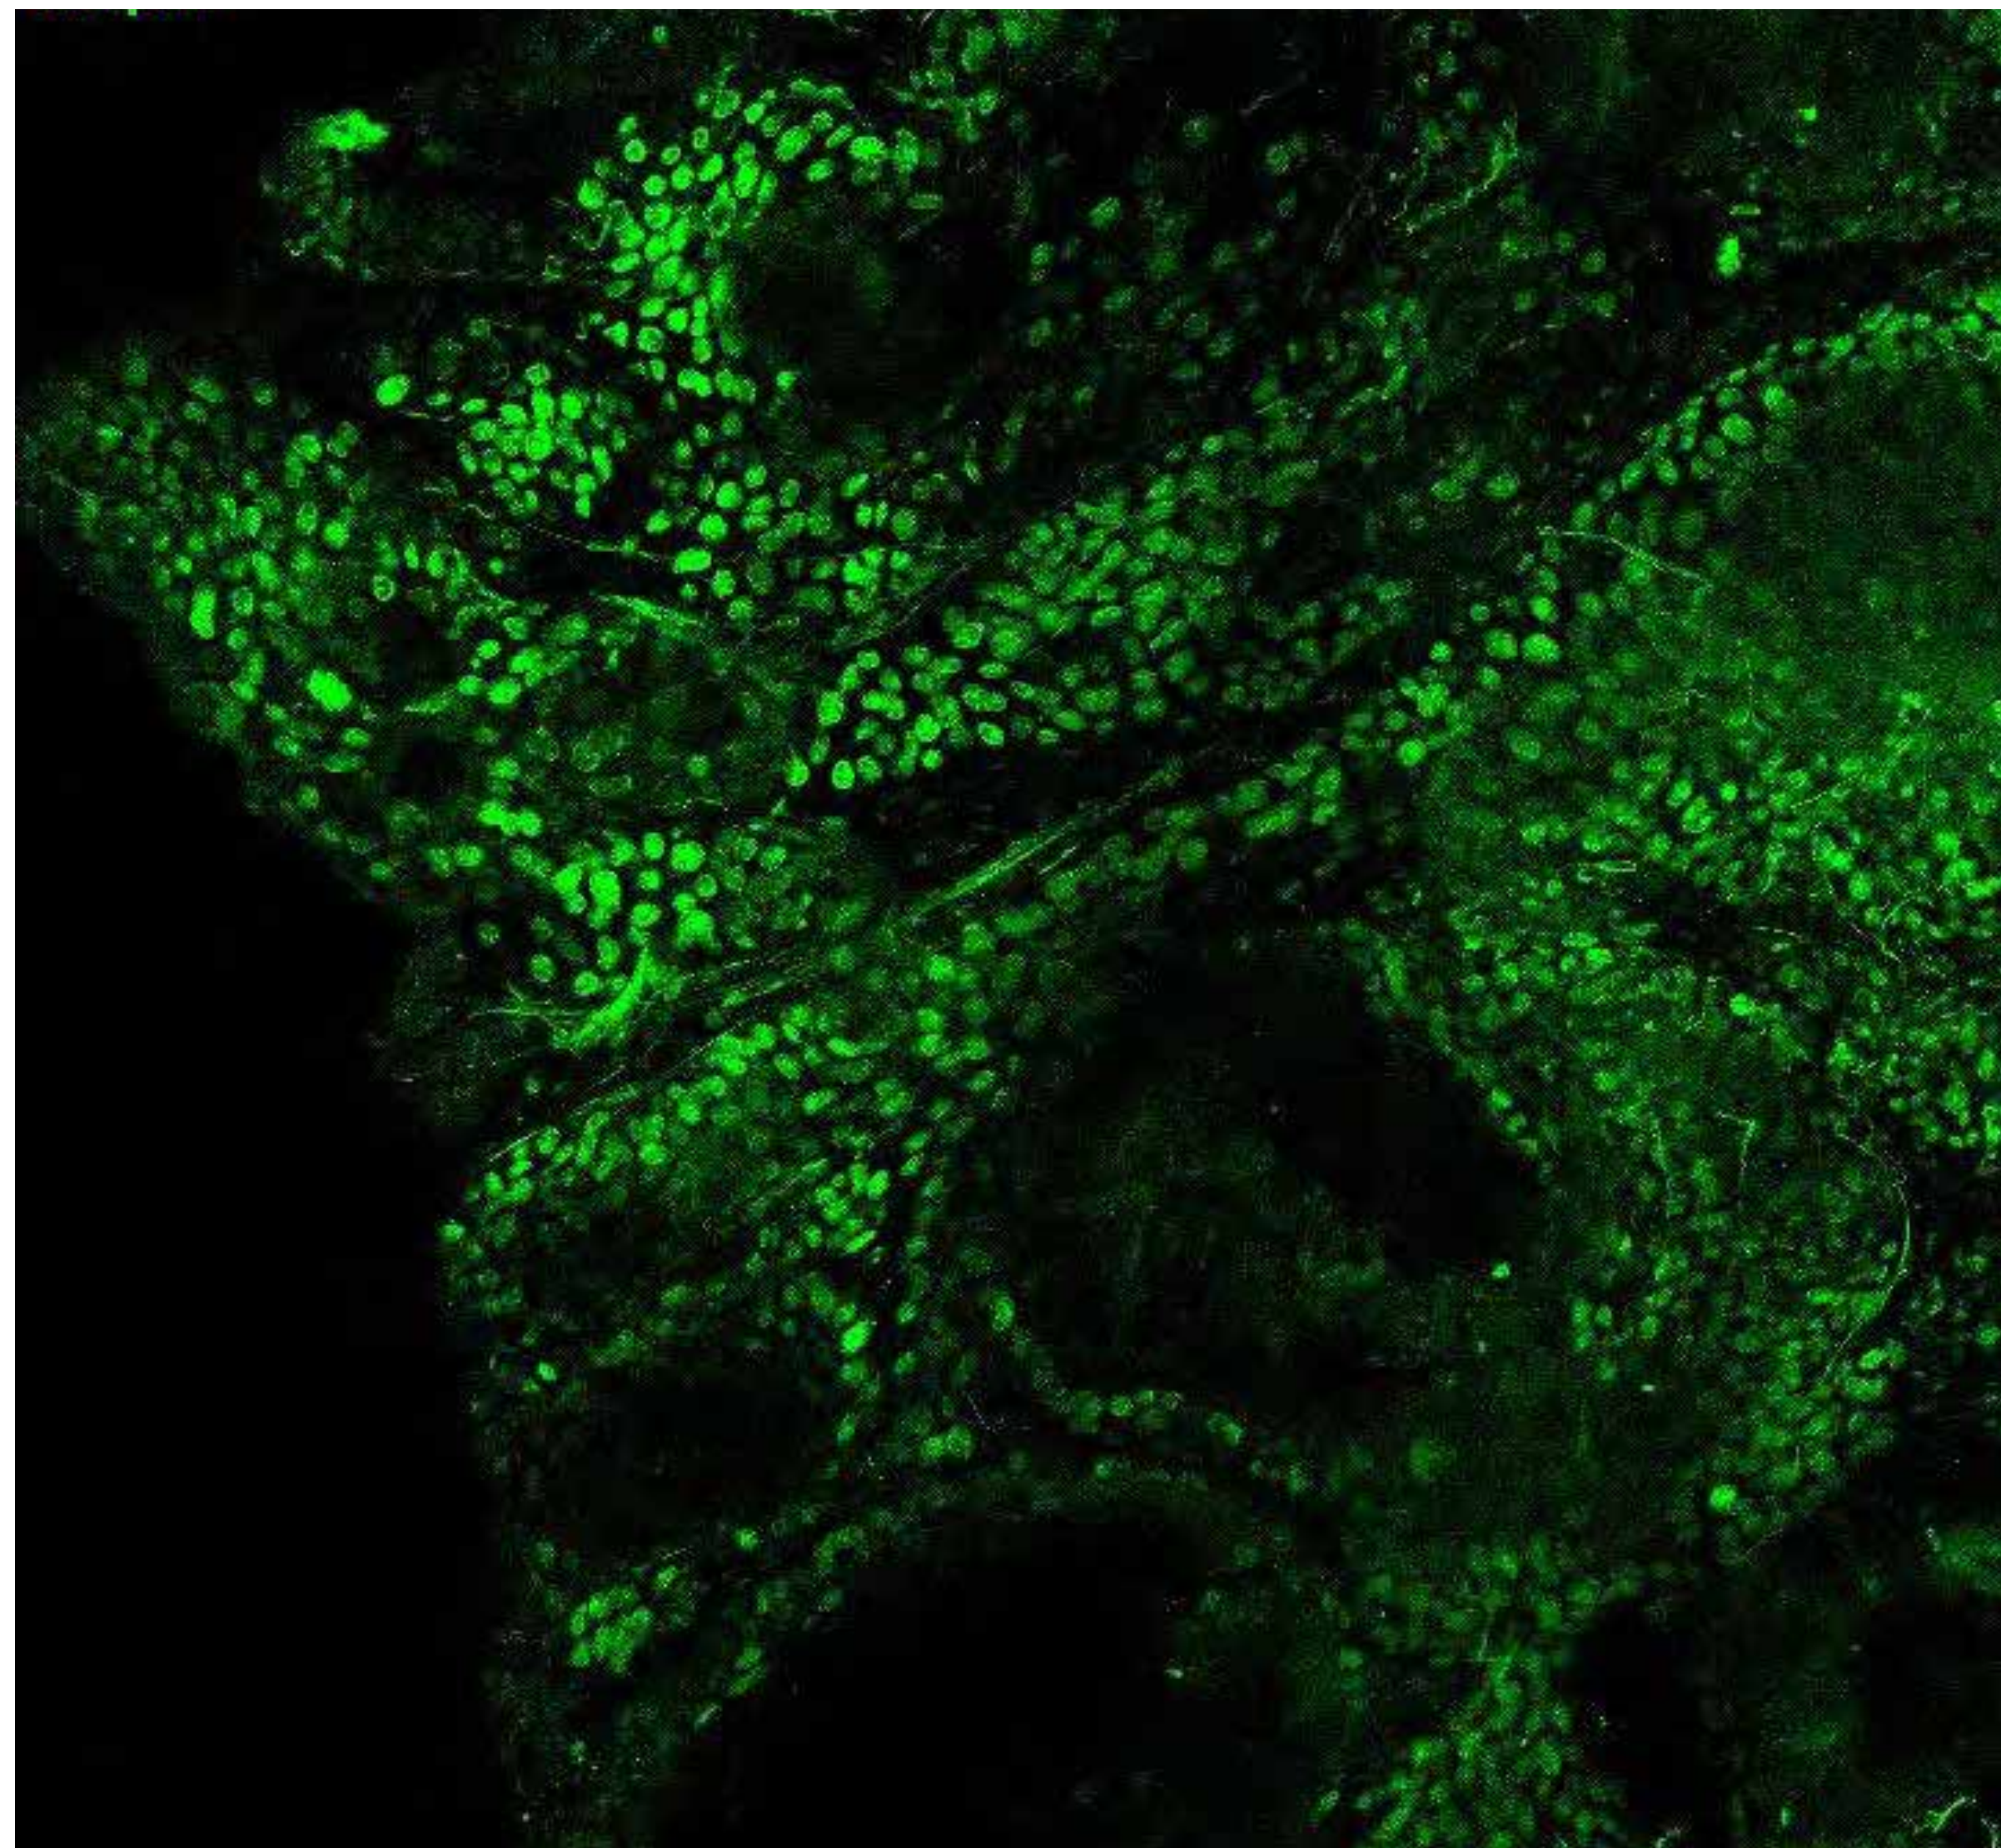

PARPi-FL only (green)

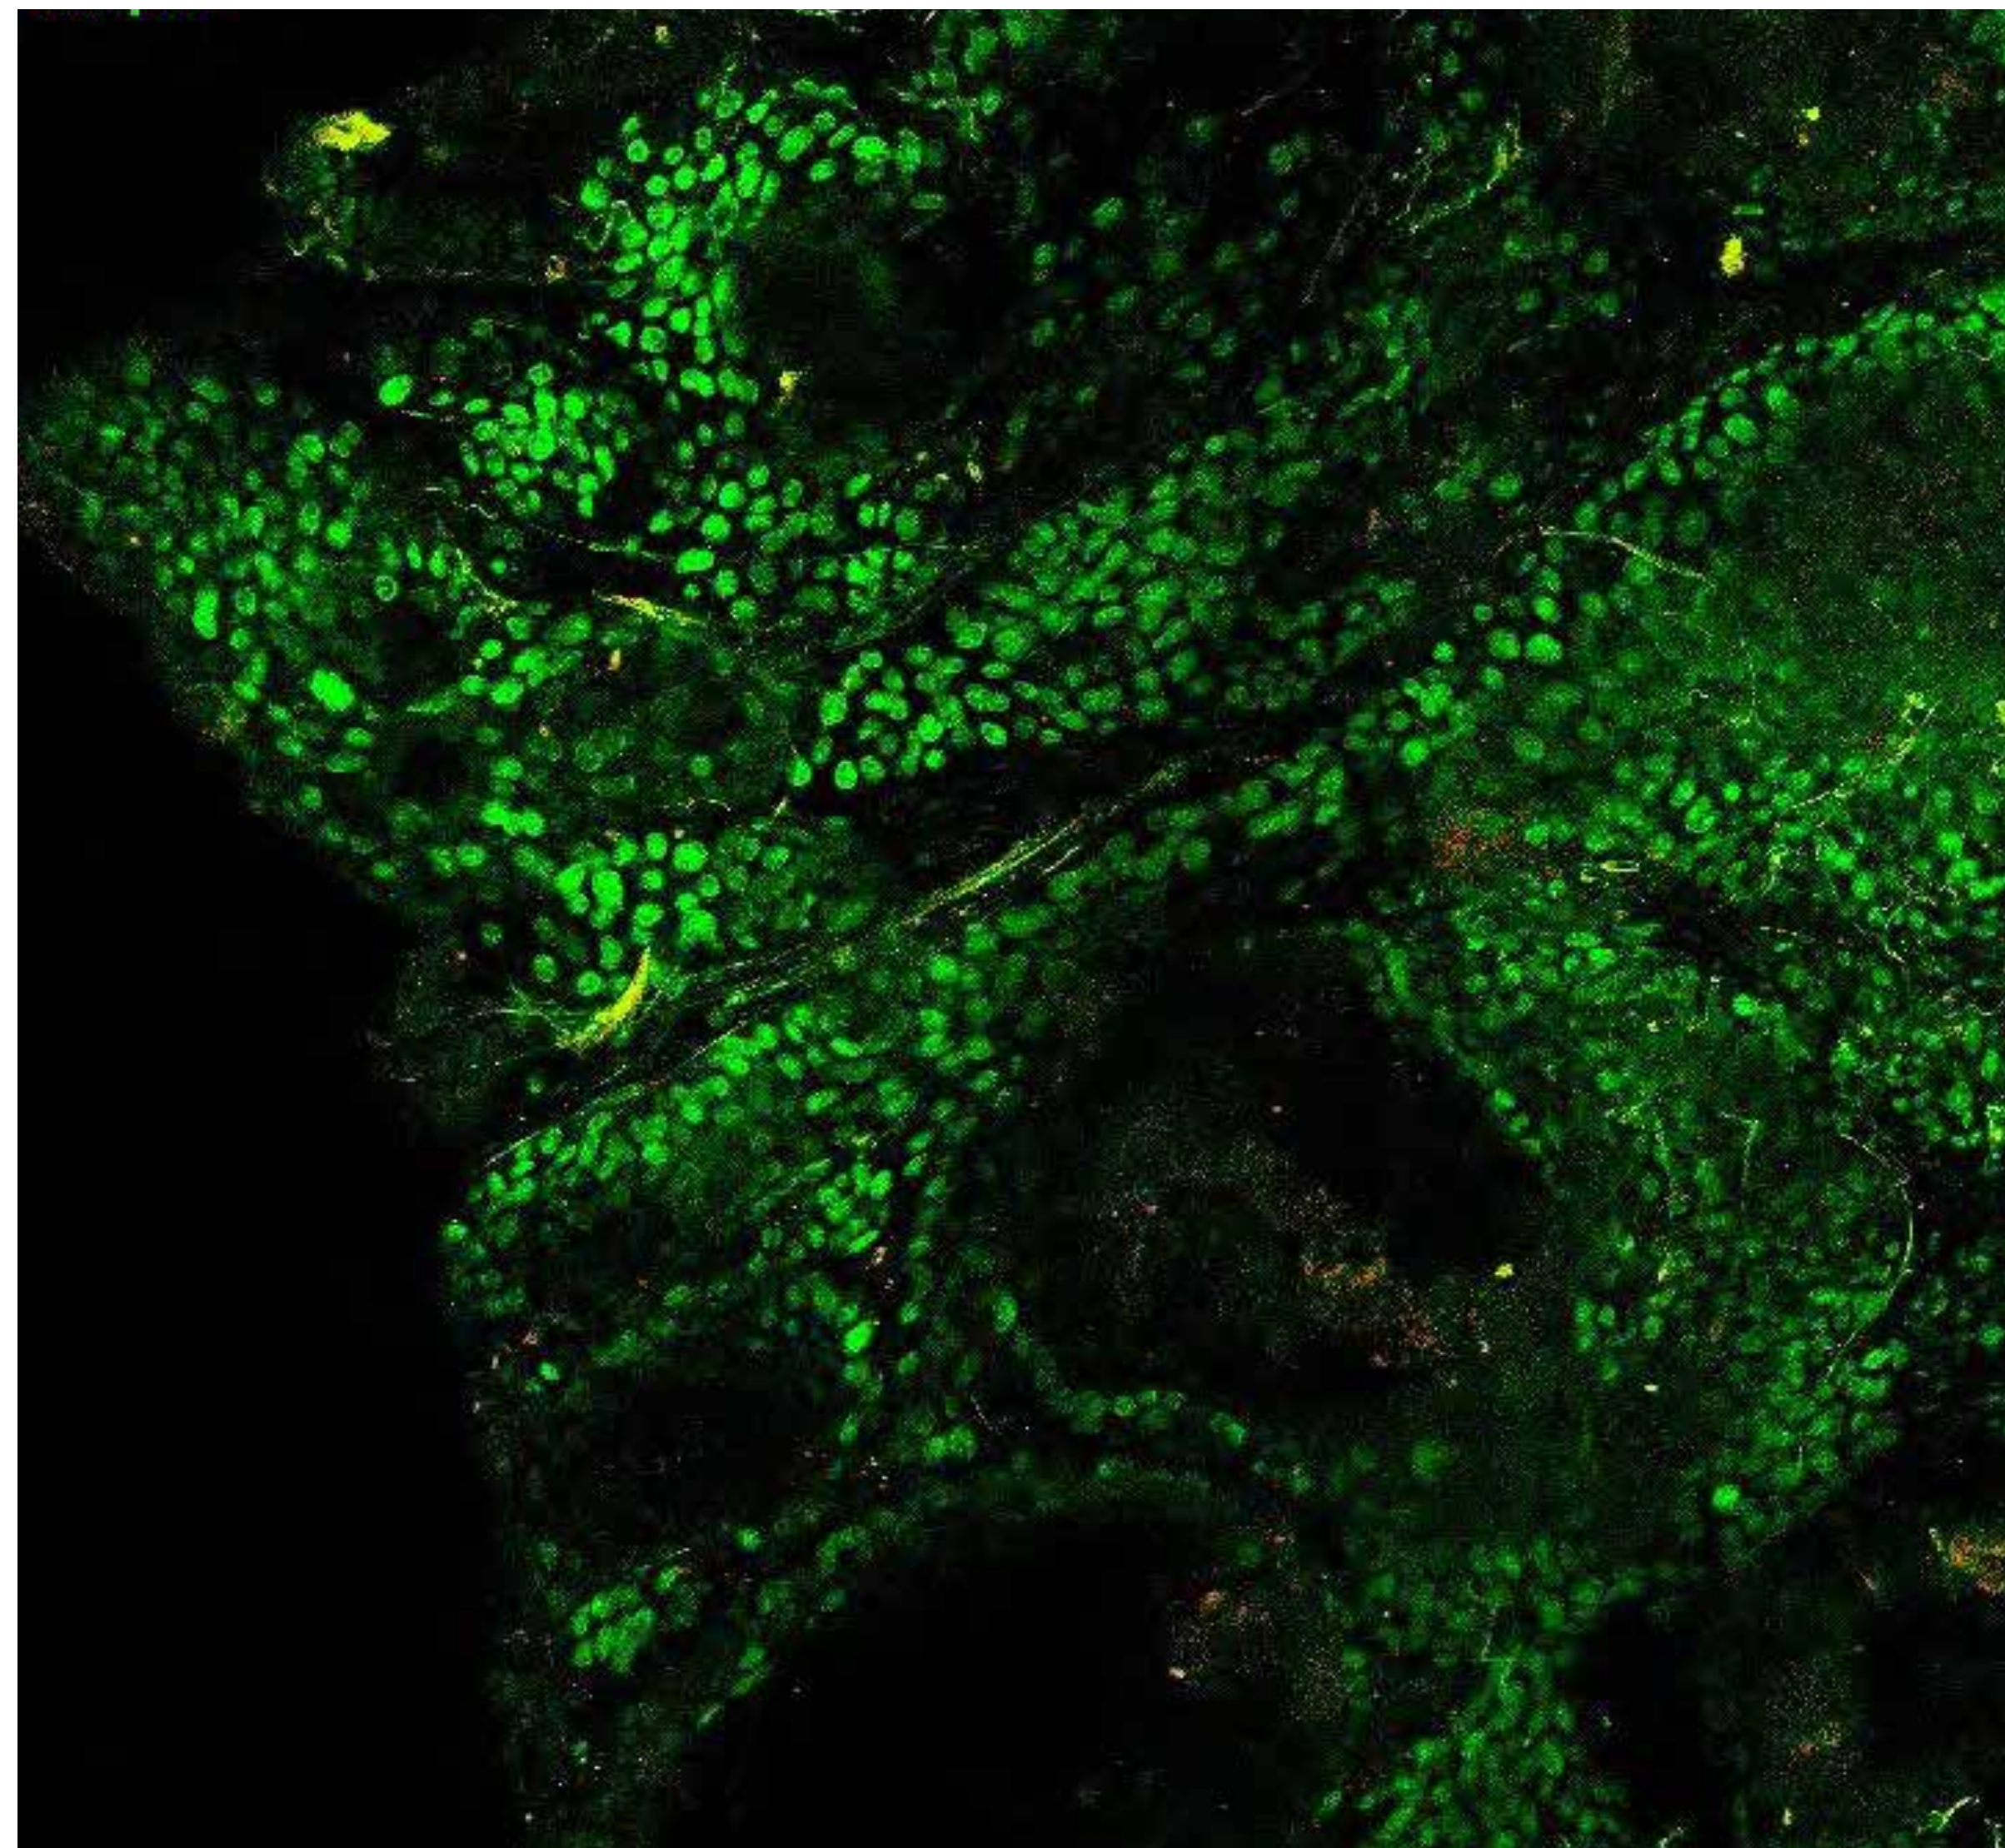

PARPi-FL (green) + Autofluorescence (red/yellow)



5347

Close-up

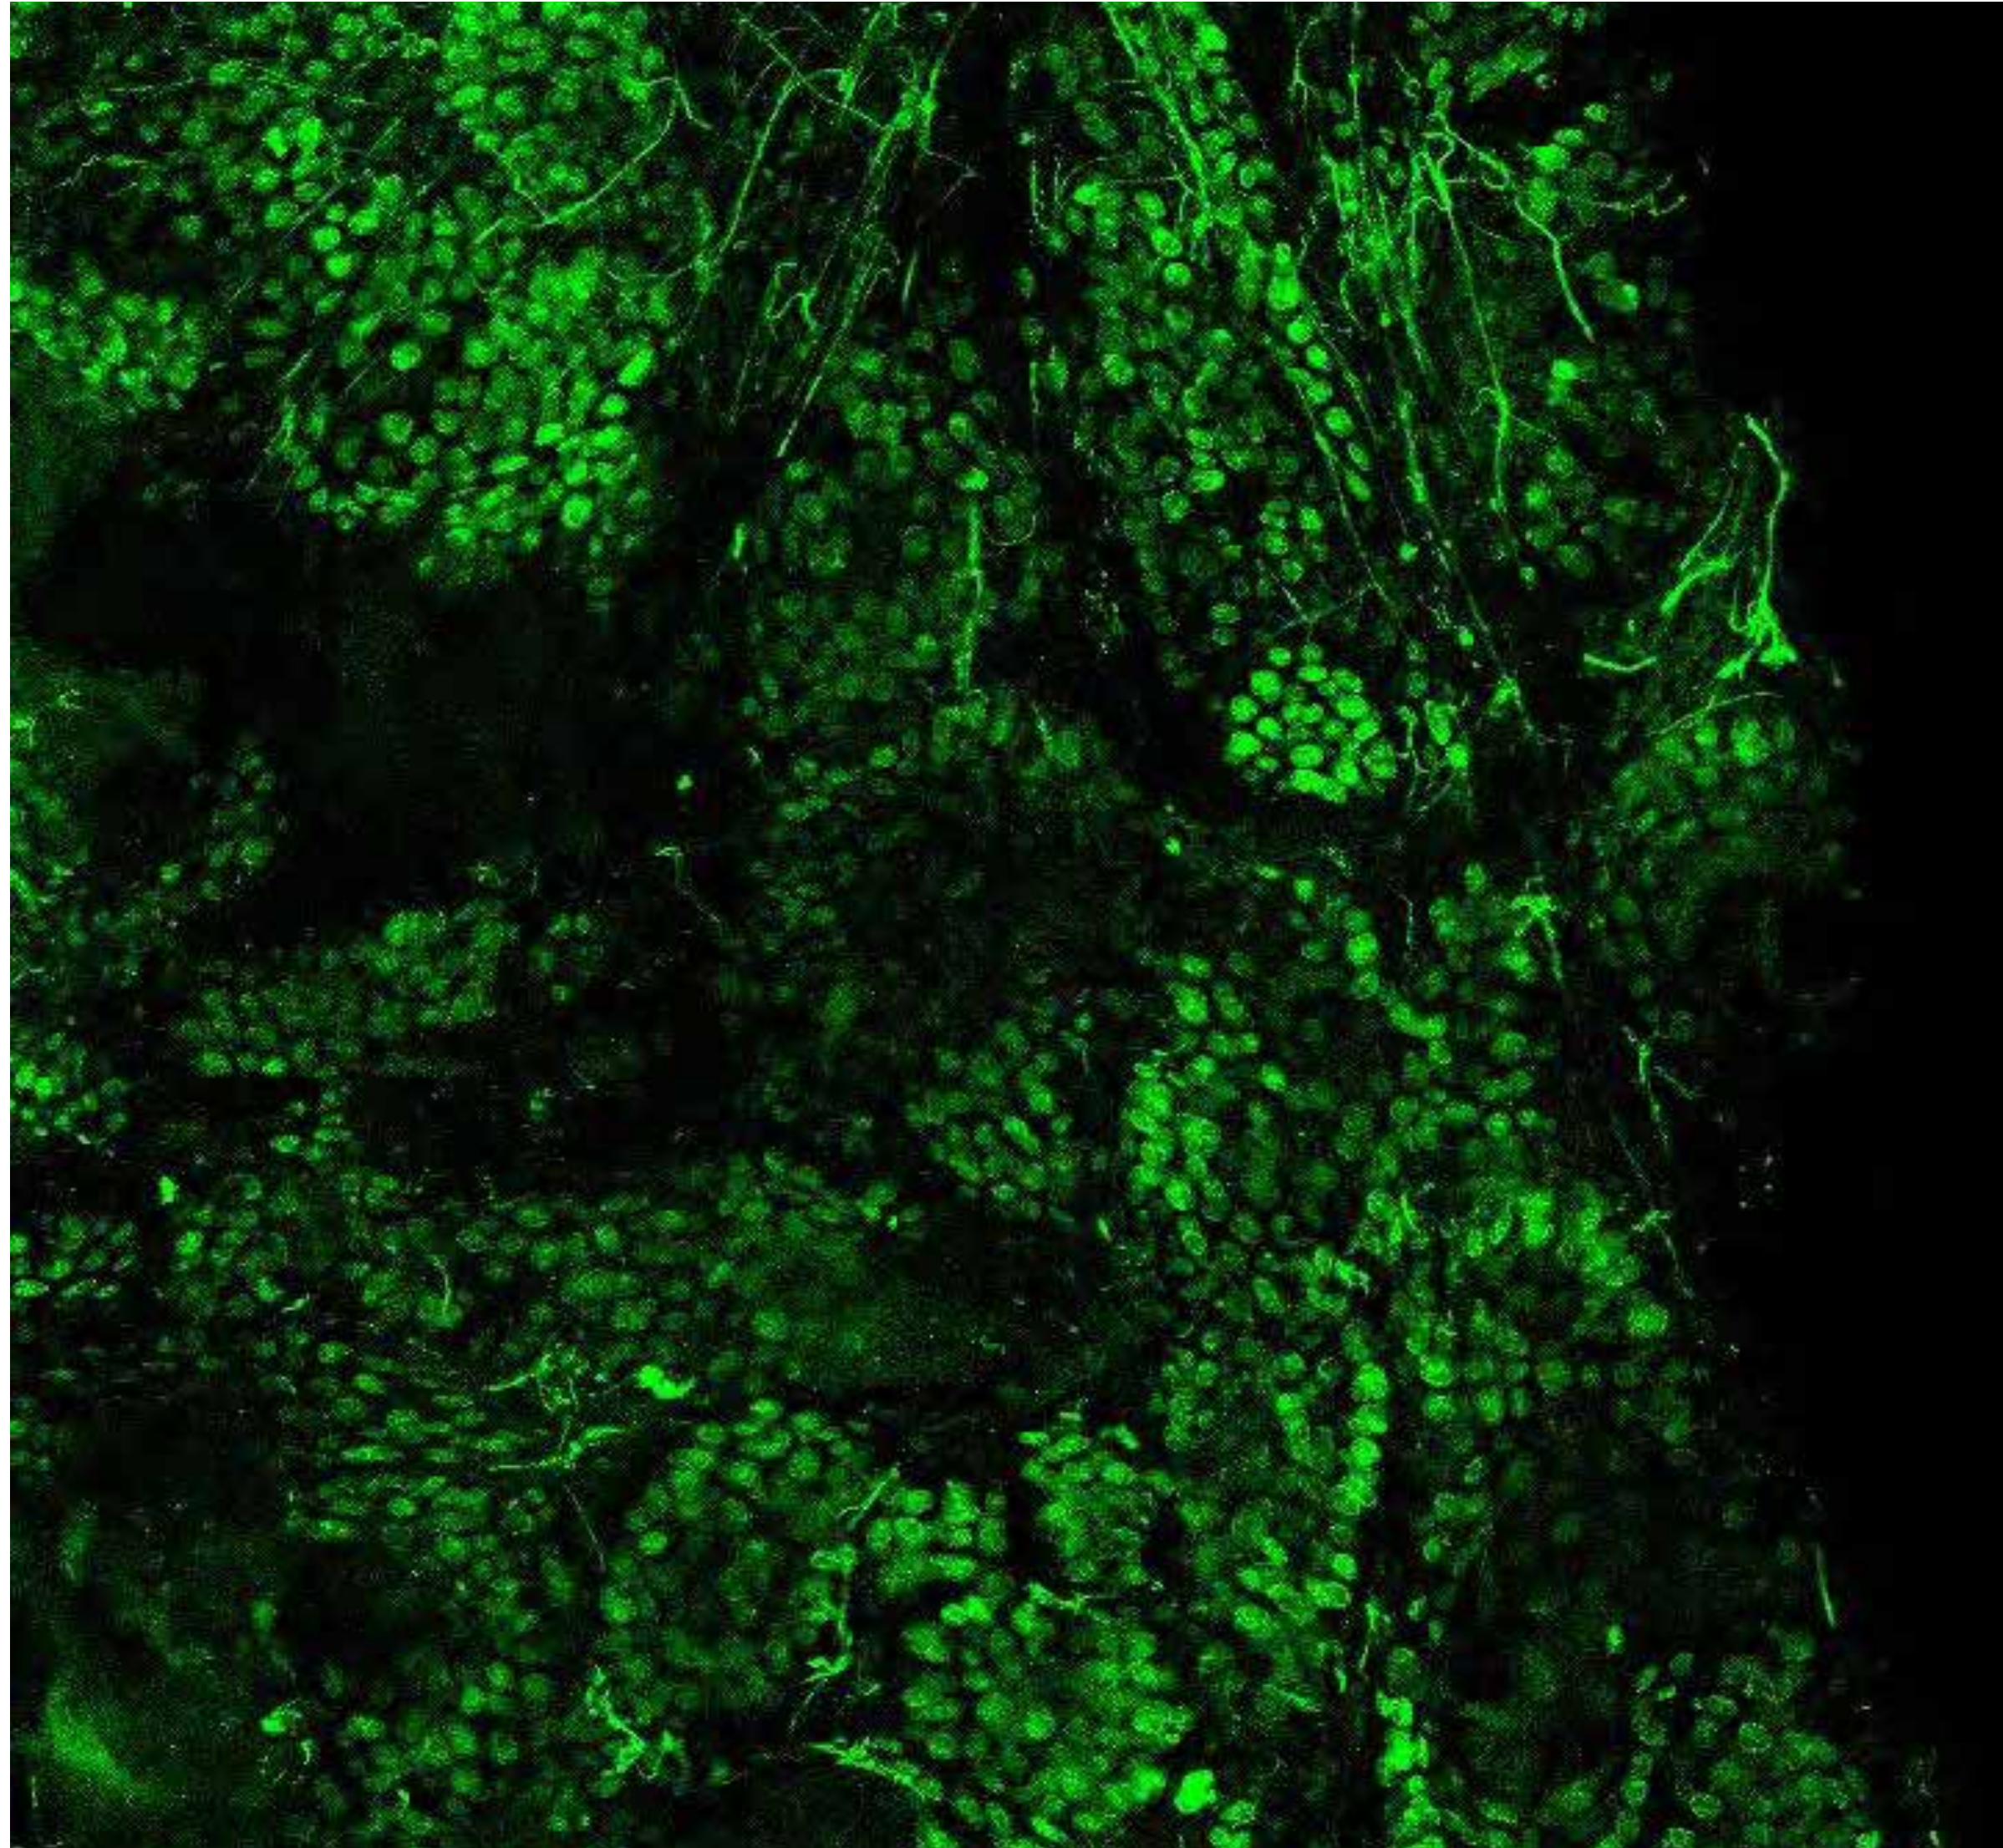

PARPi-FL only (green)

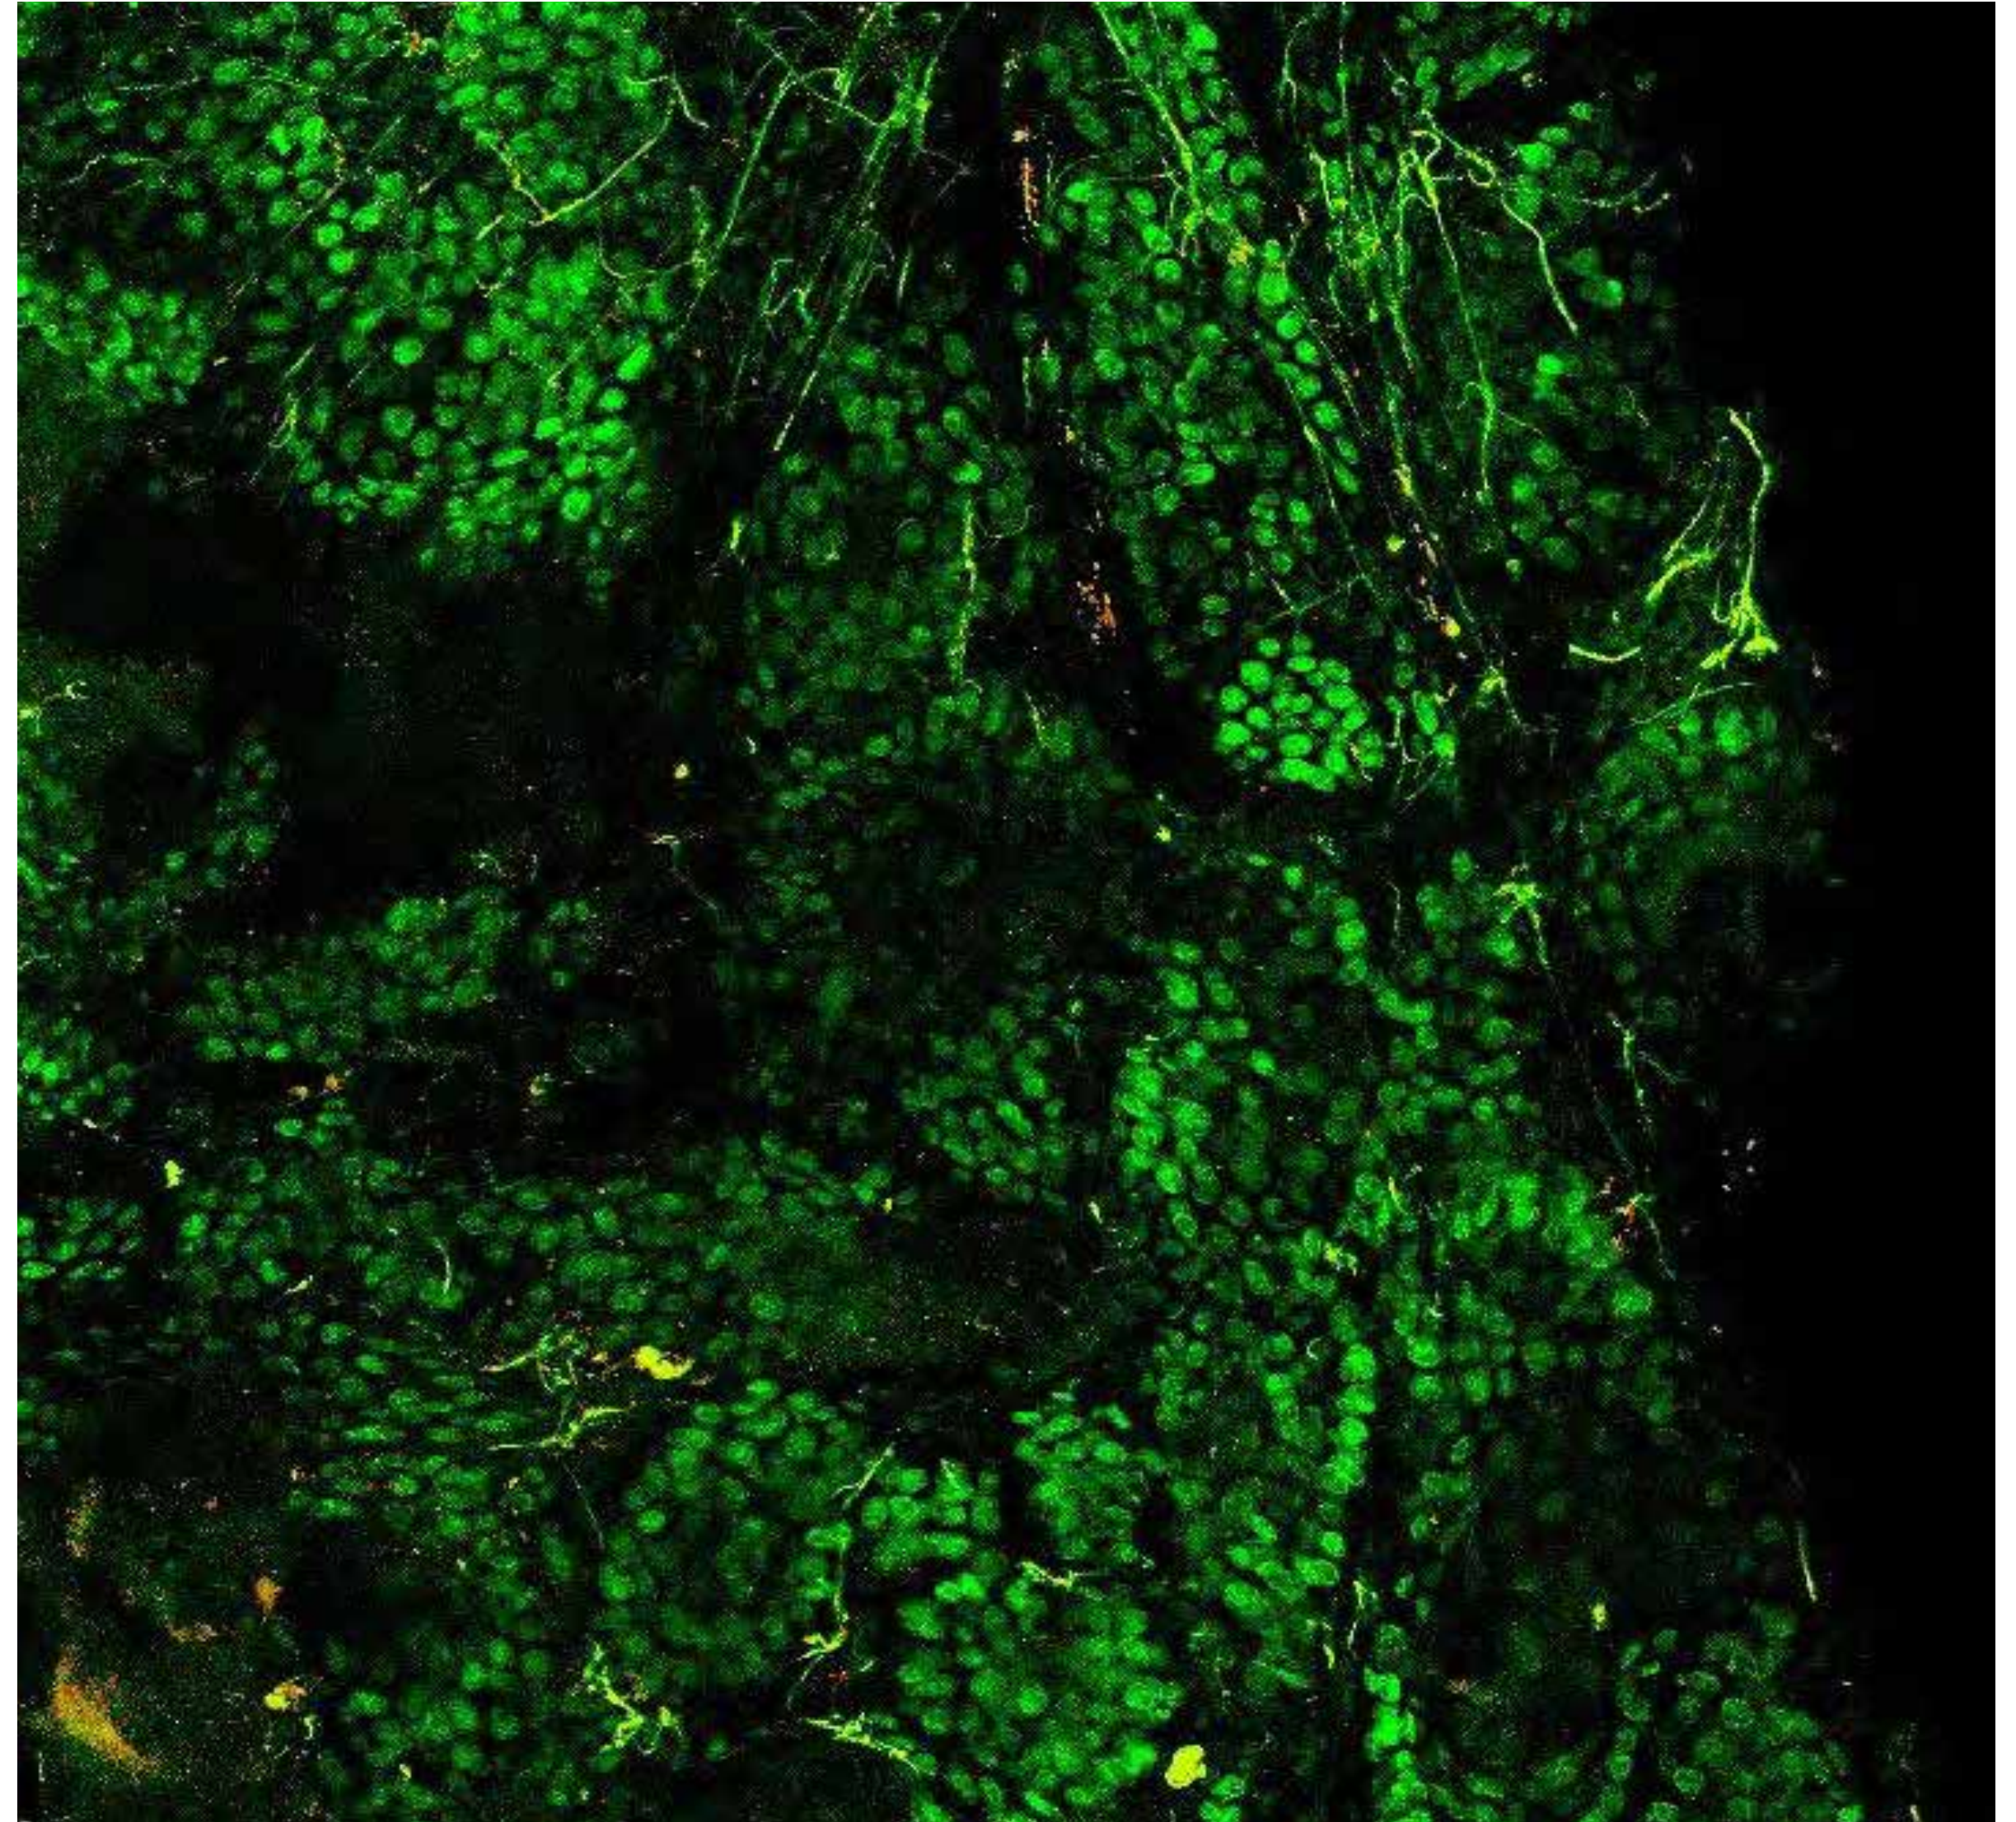

PARPi-FL (green) + Autofluorescence (red/yellow)



5347

Close-up

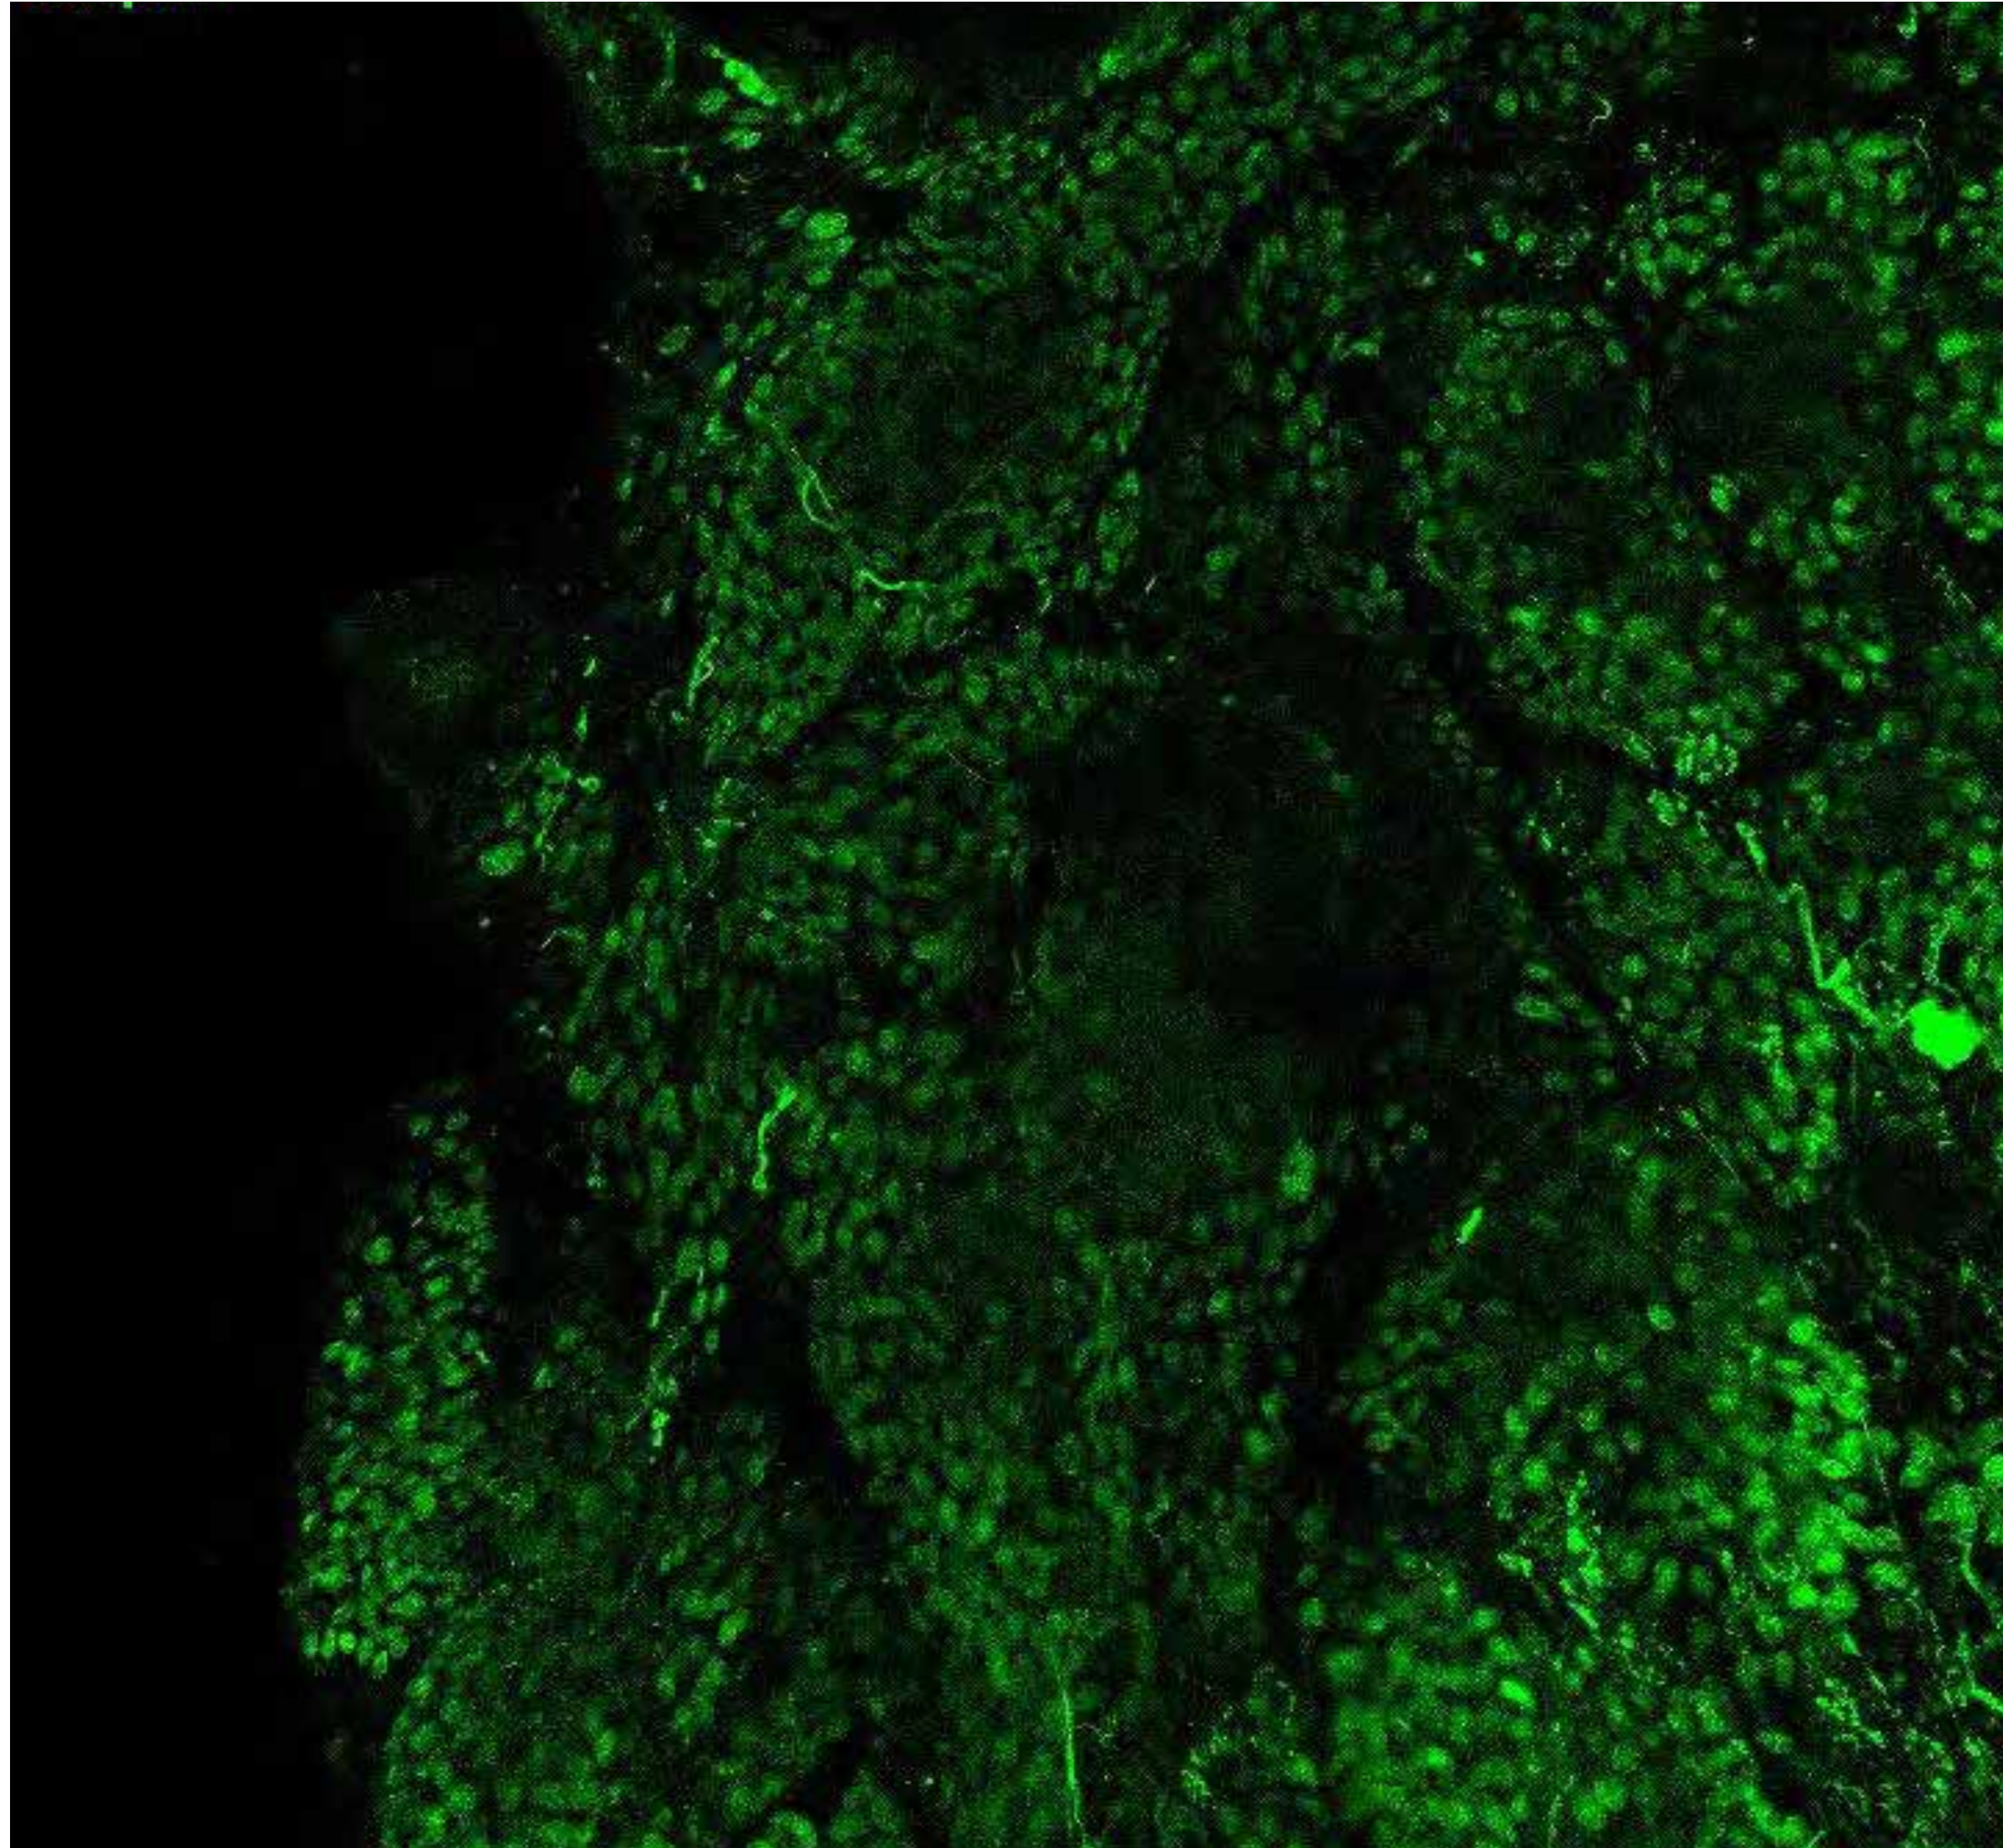

PARPi-FL only (green)

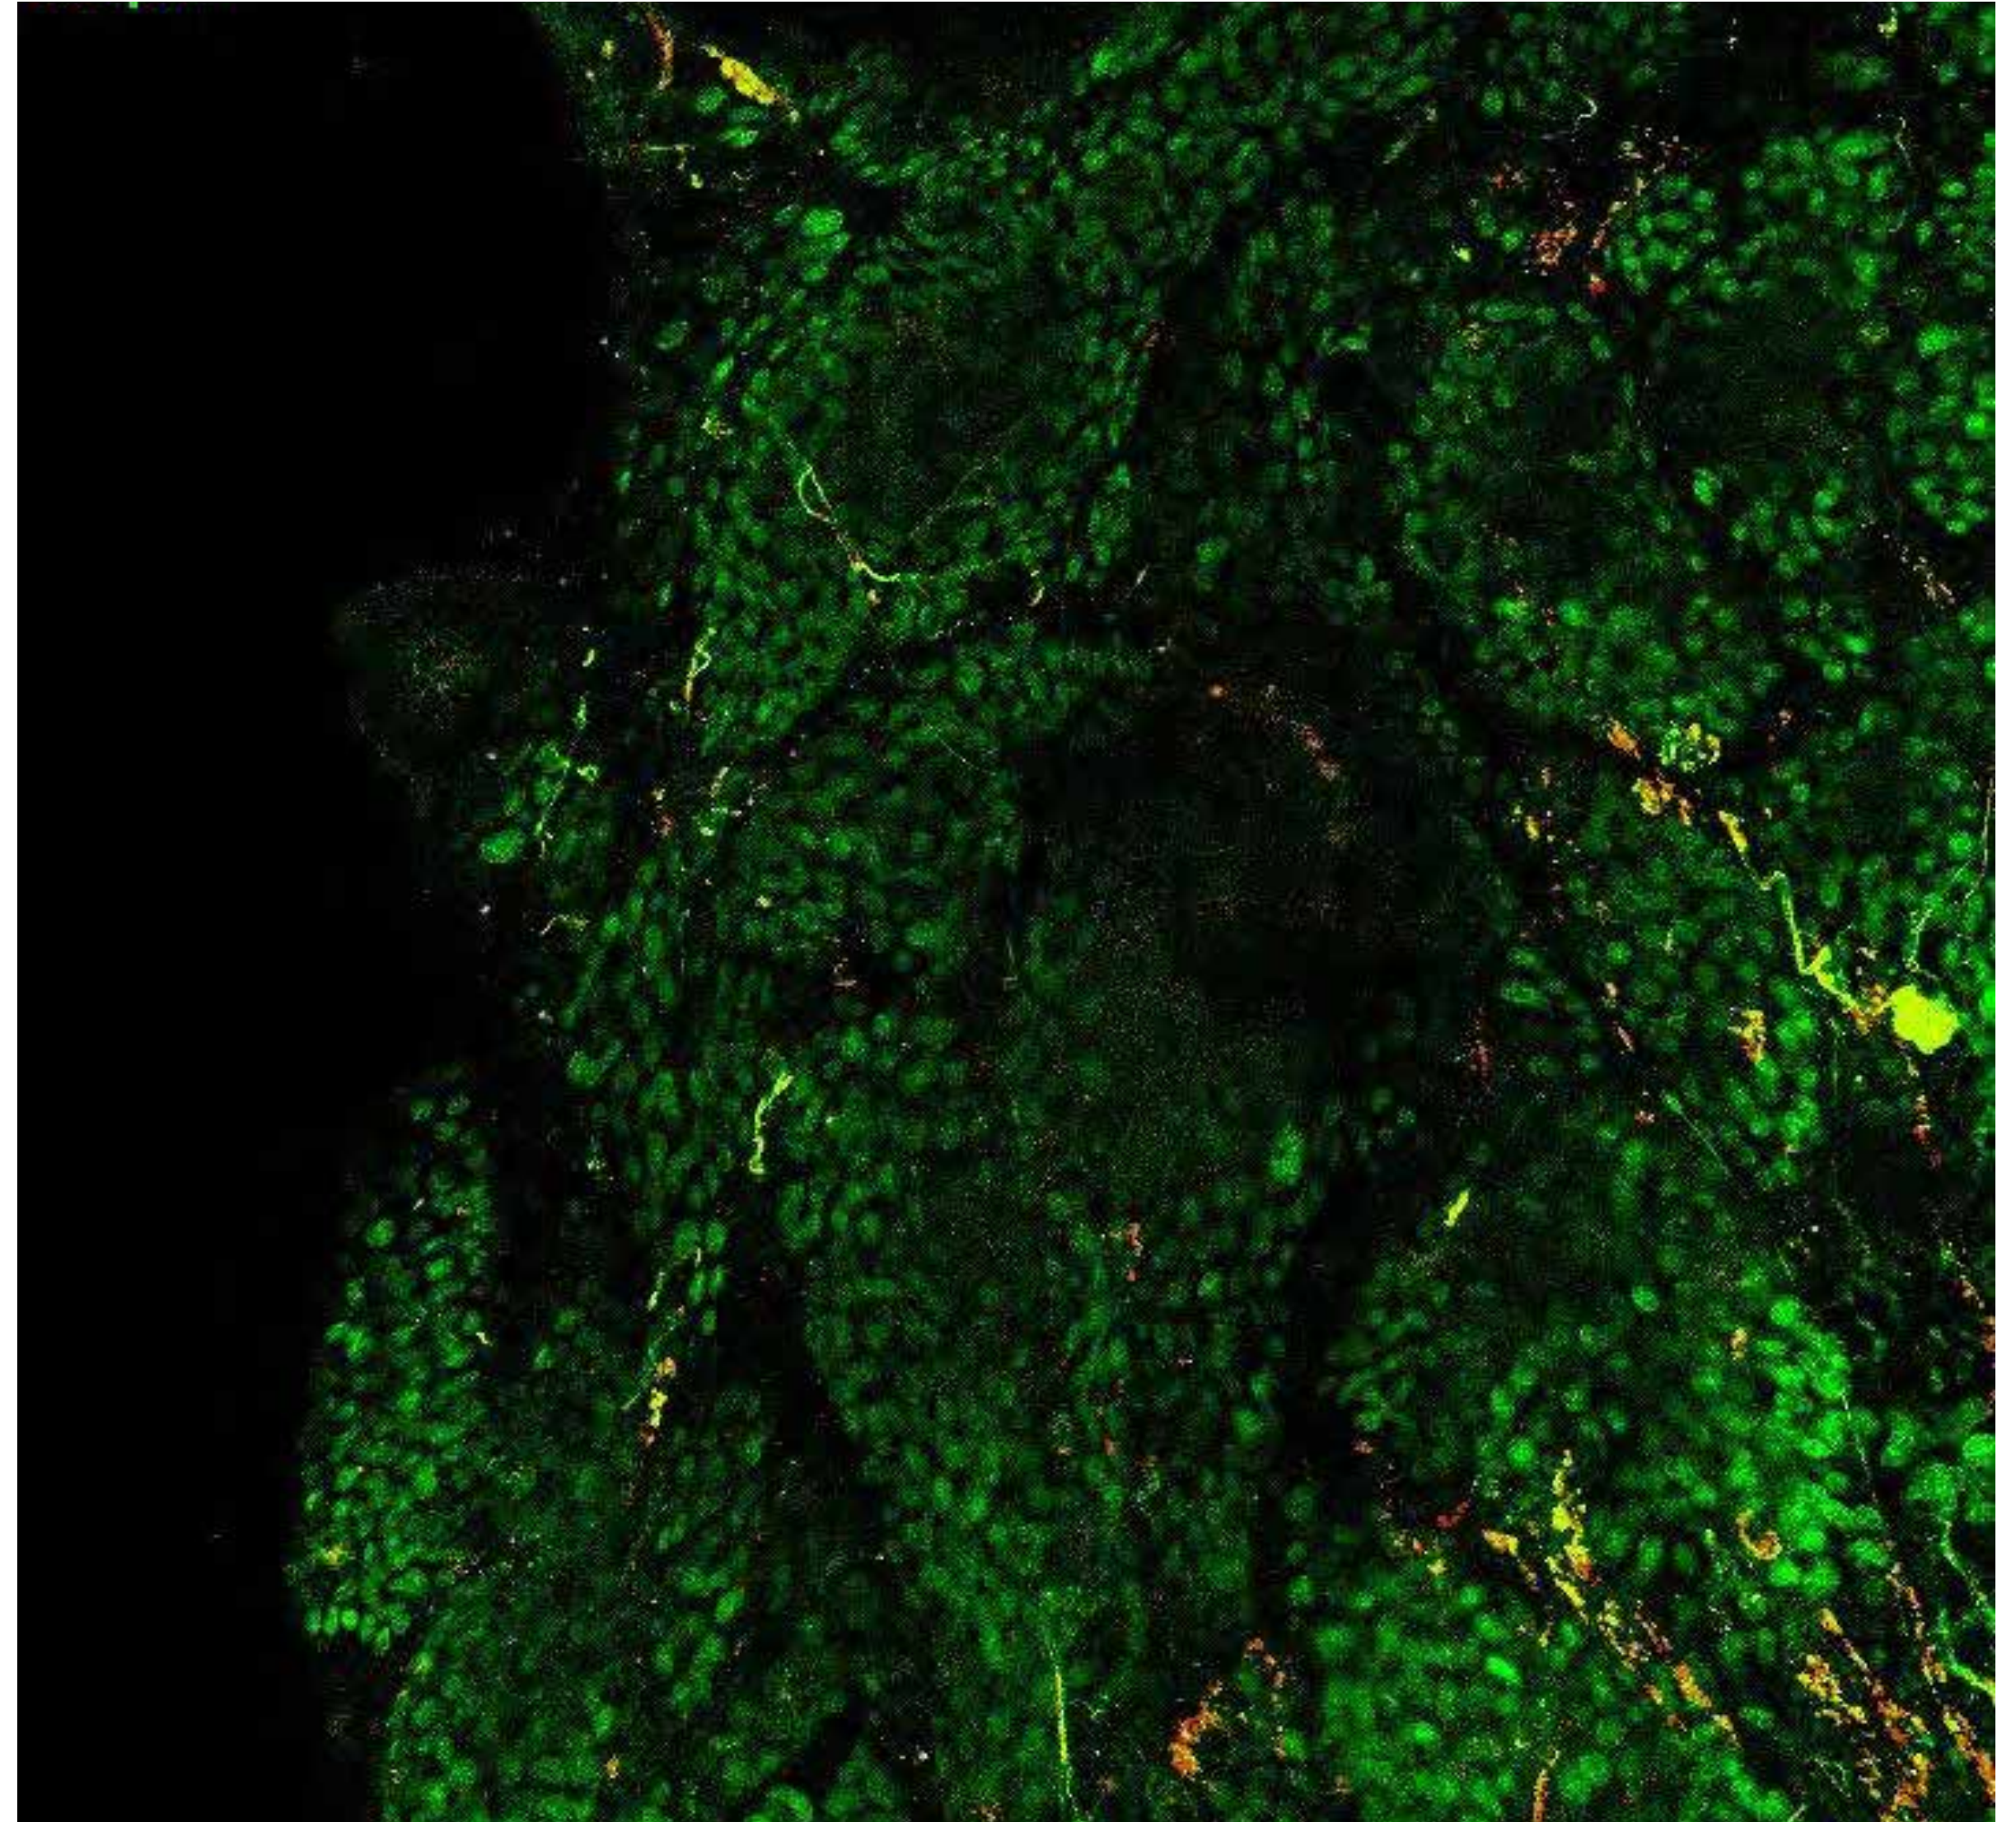

PARPi-FL (green) + Autofluorescence (red/yellow)



5347

Close-up

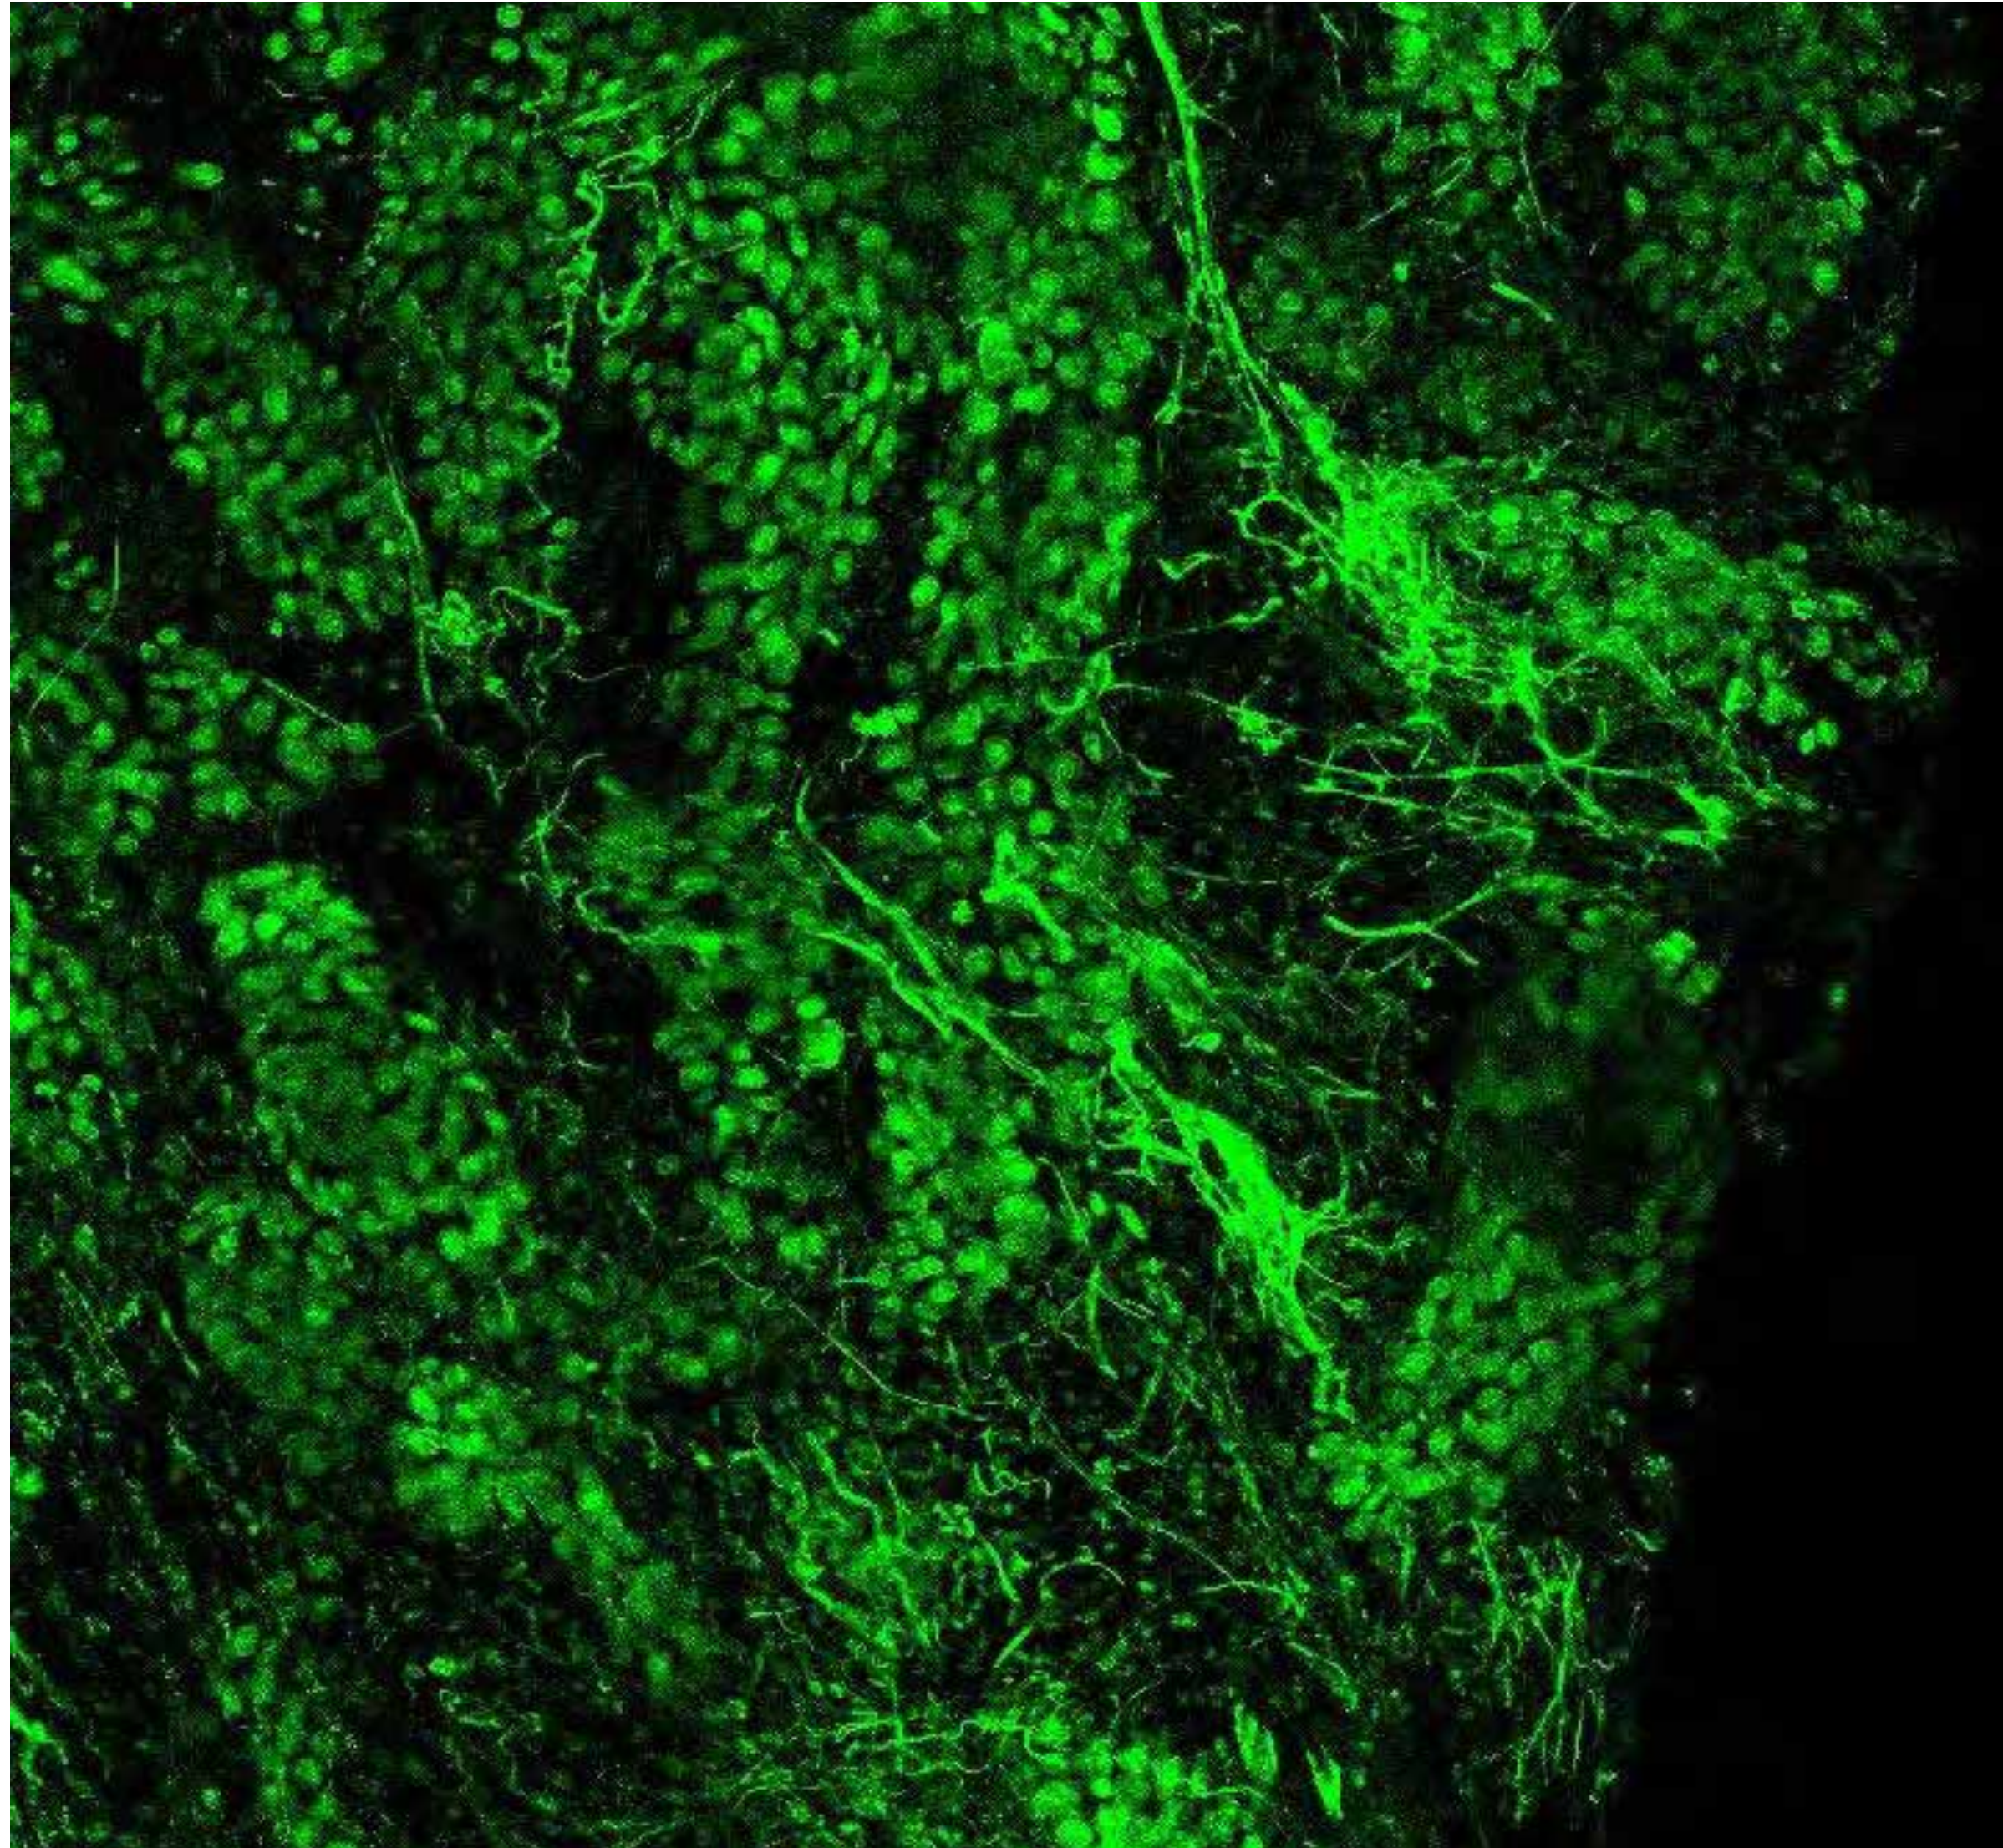

PARPi-FL only (green)

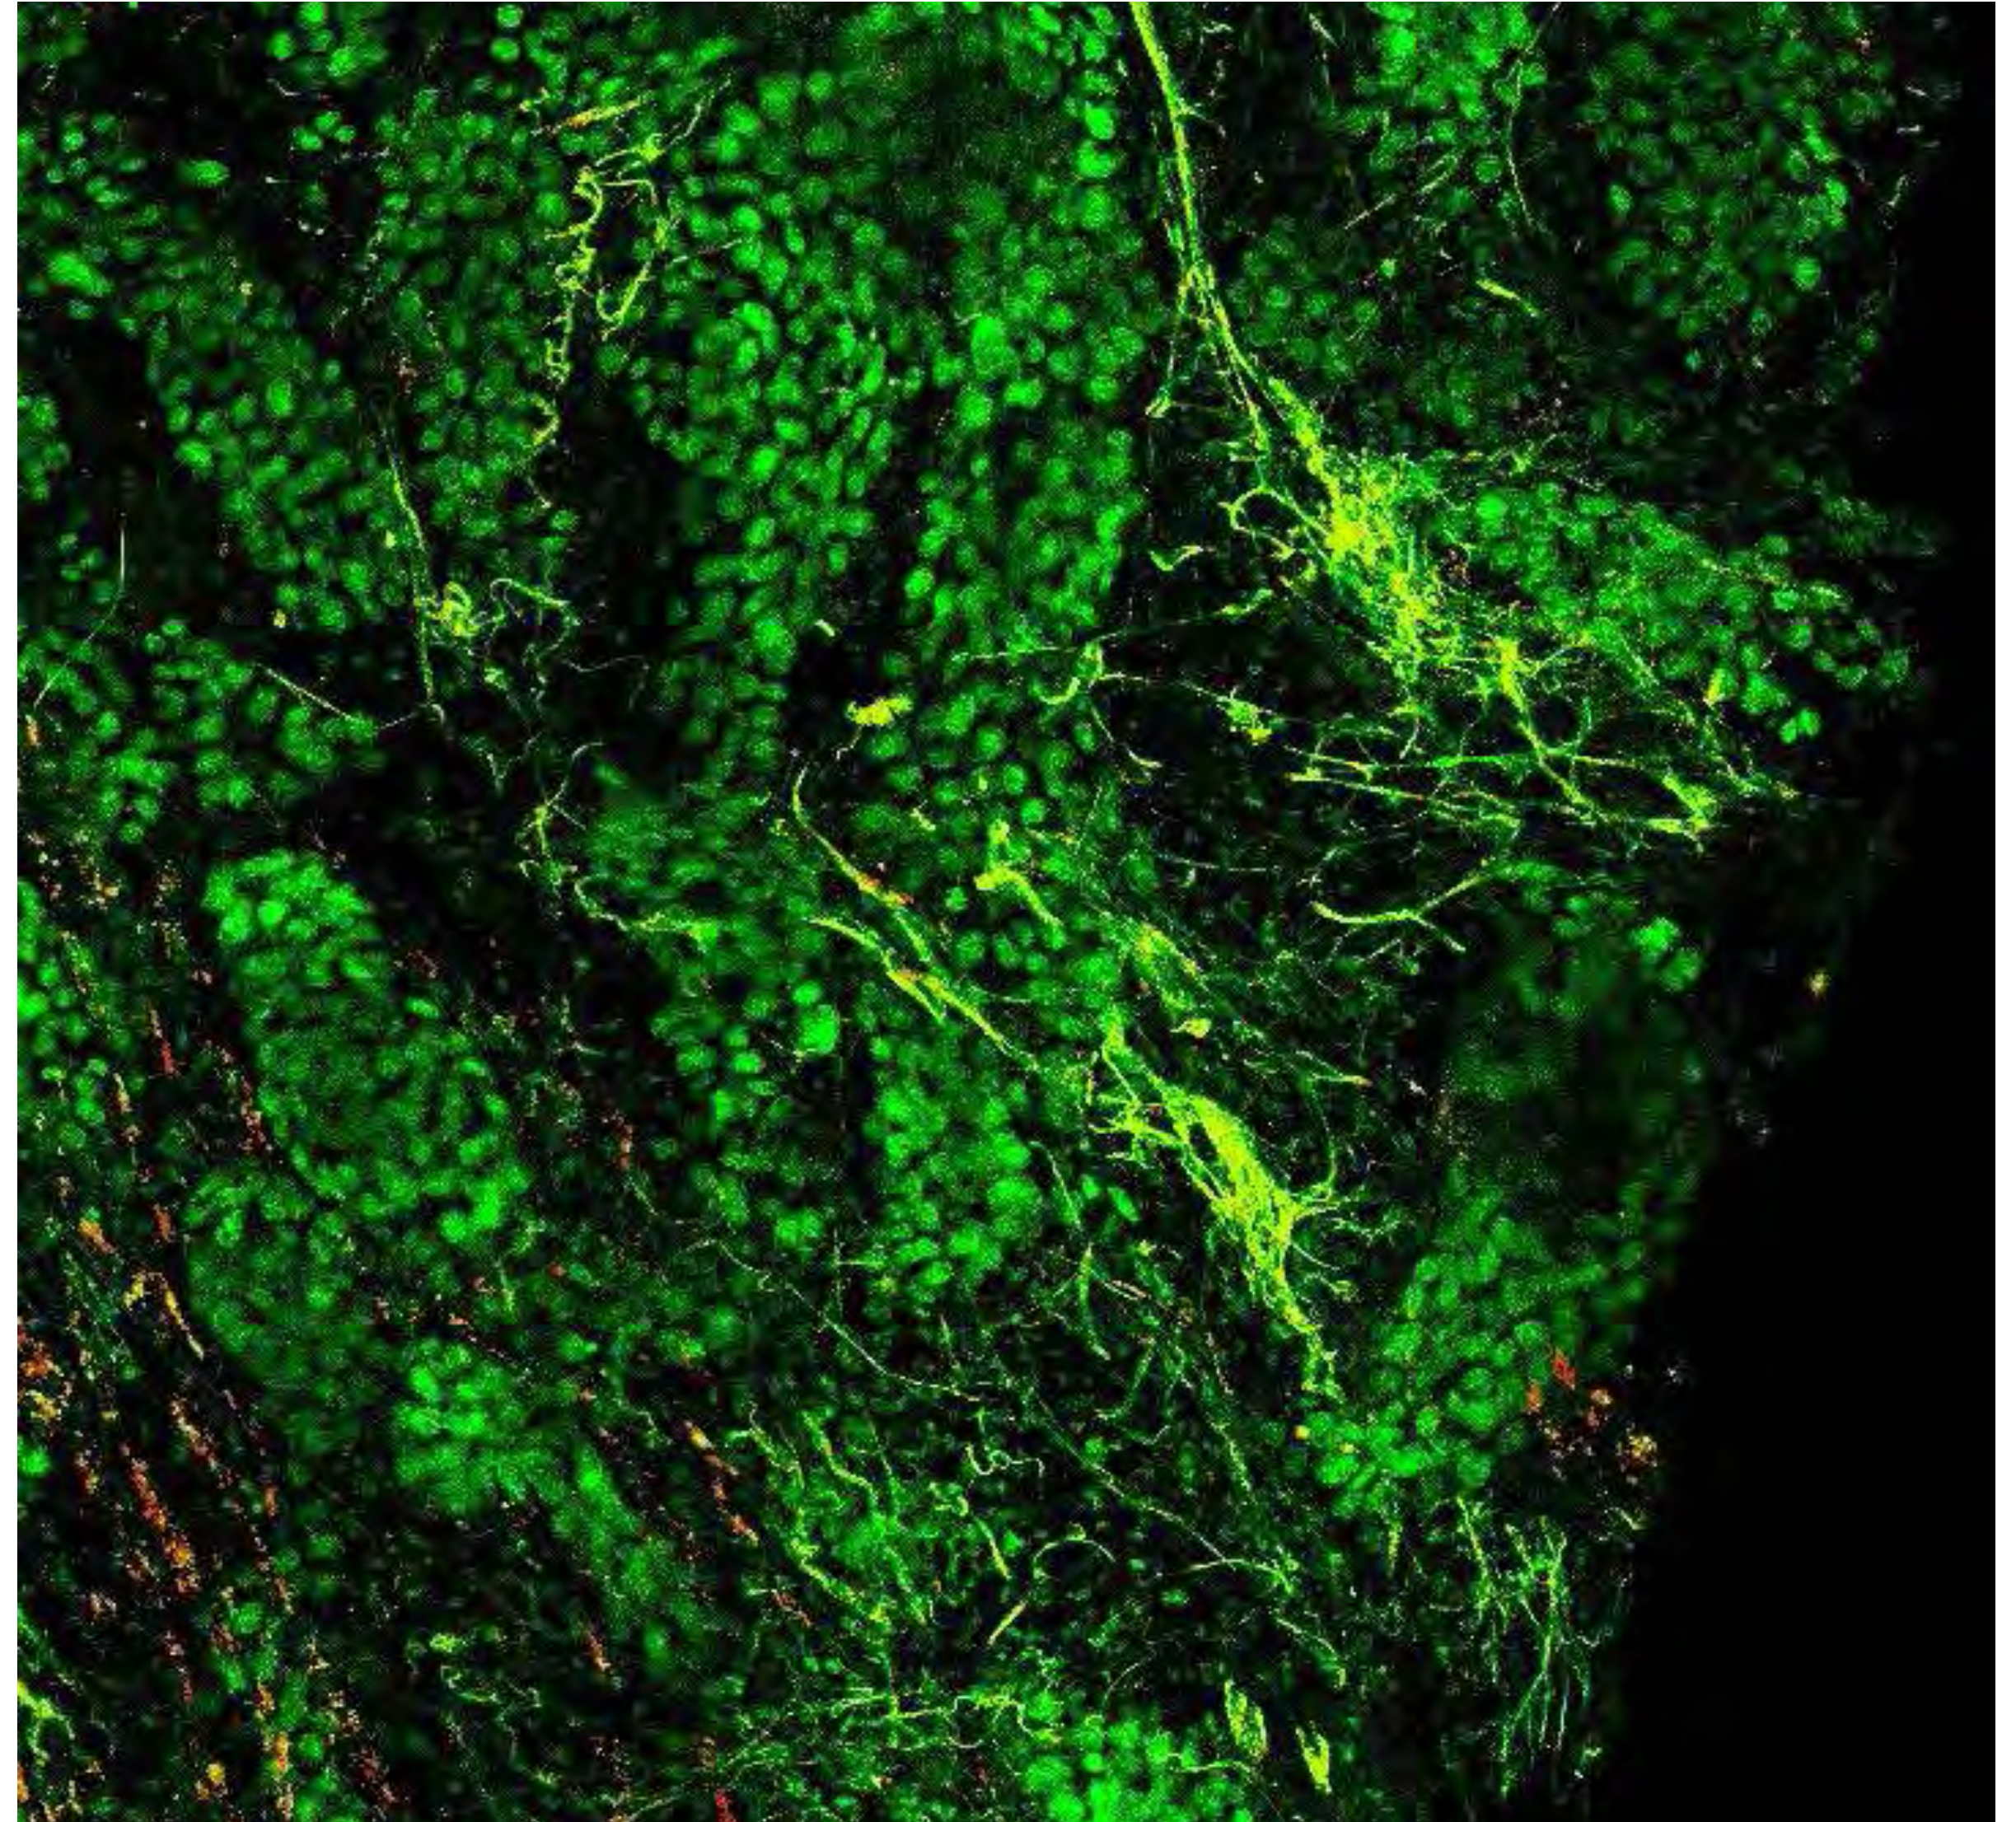

PARPi-FL (green) + Autofluorescence (red/yellow)



5347

10

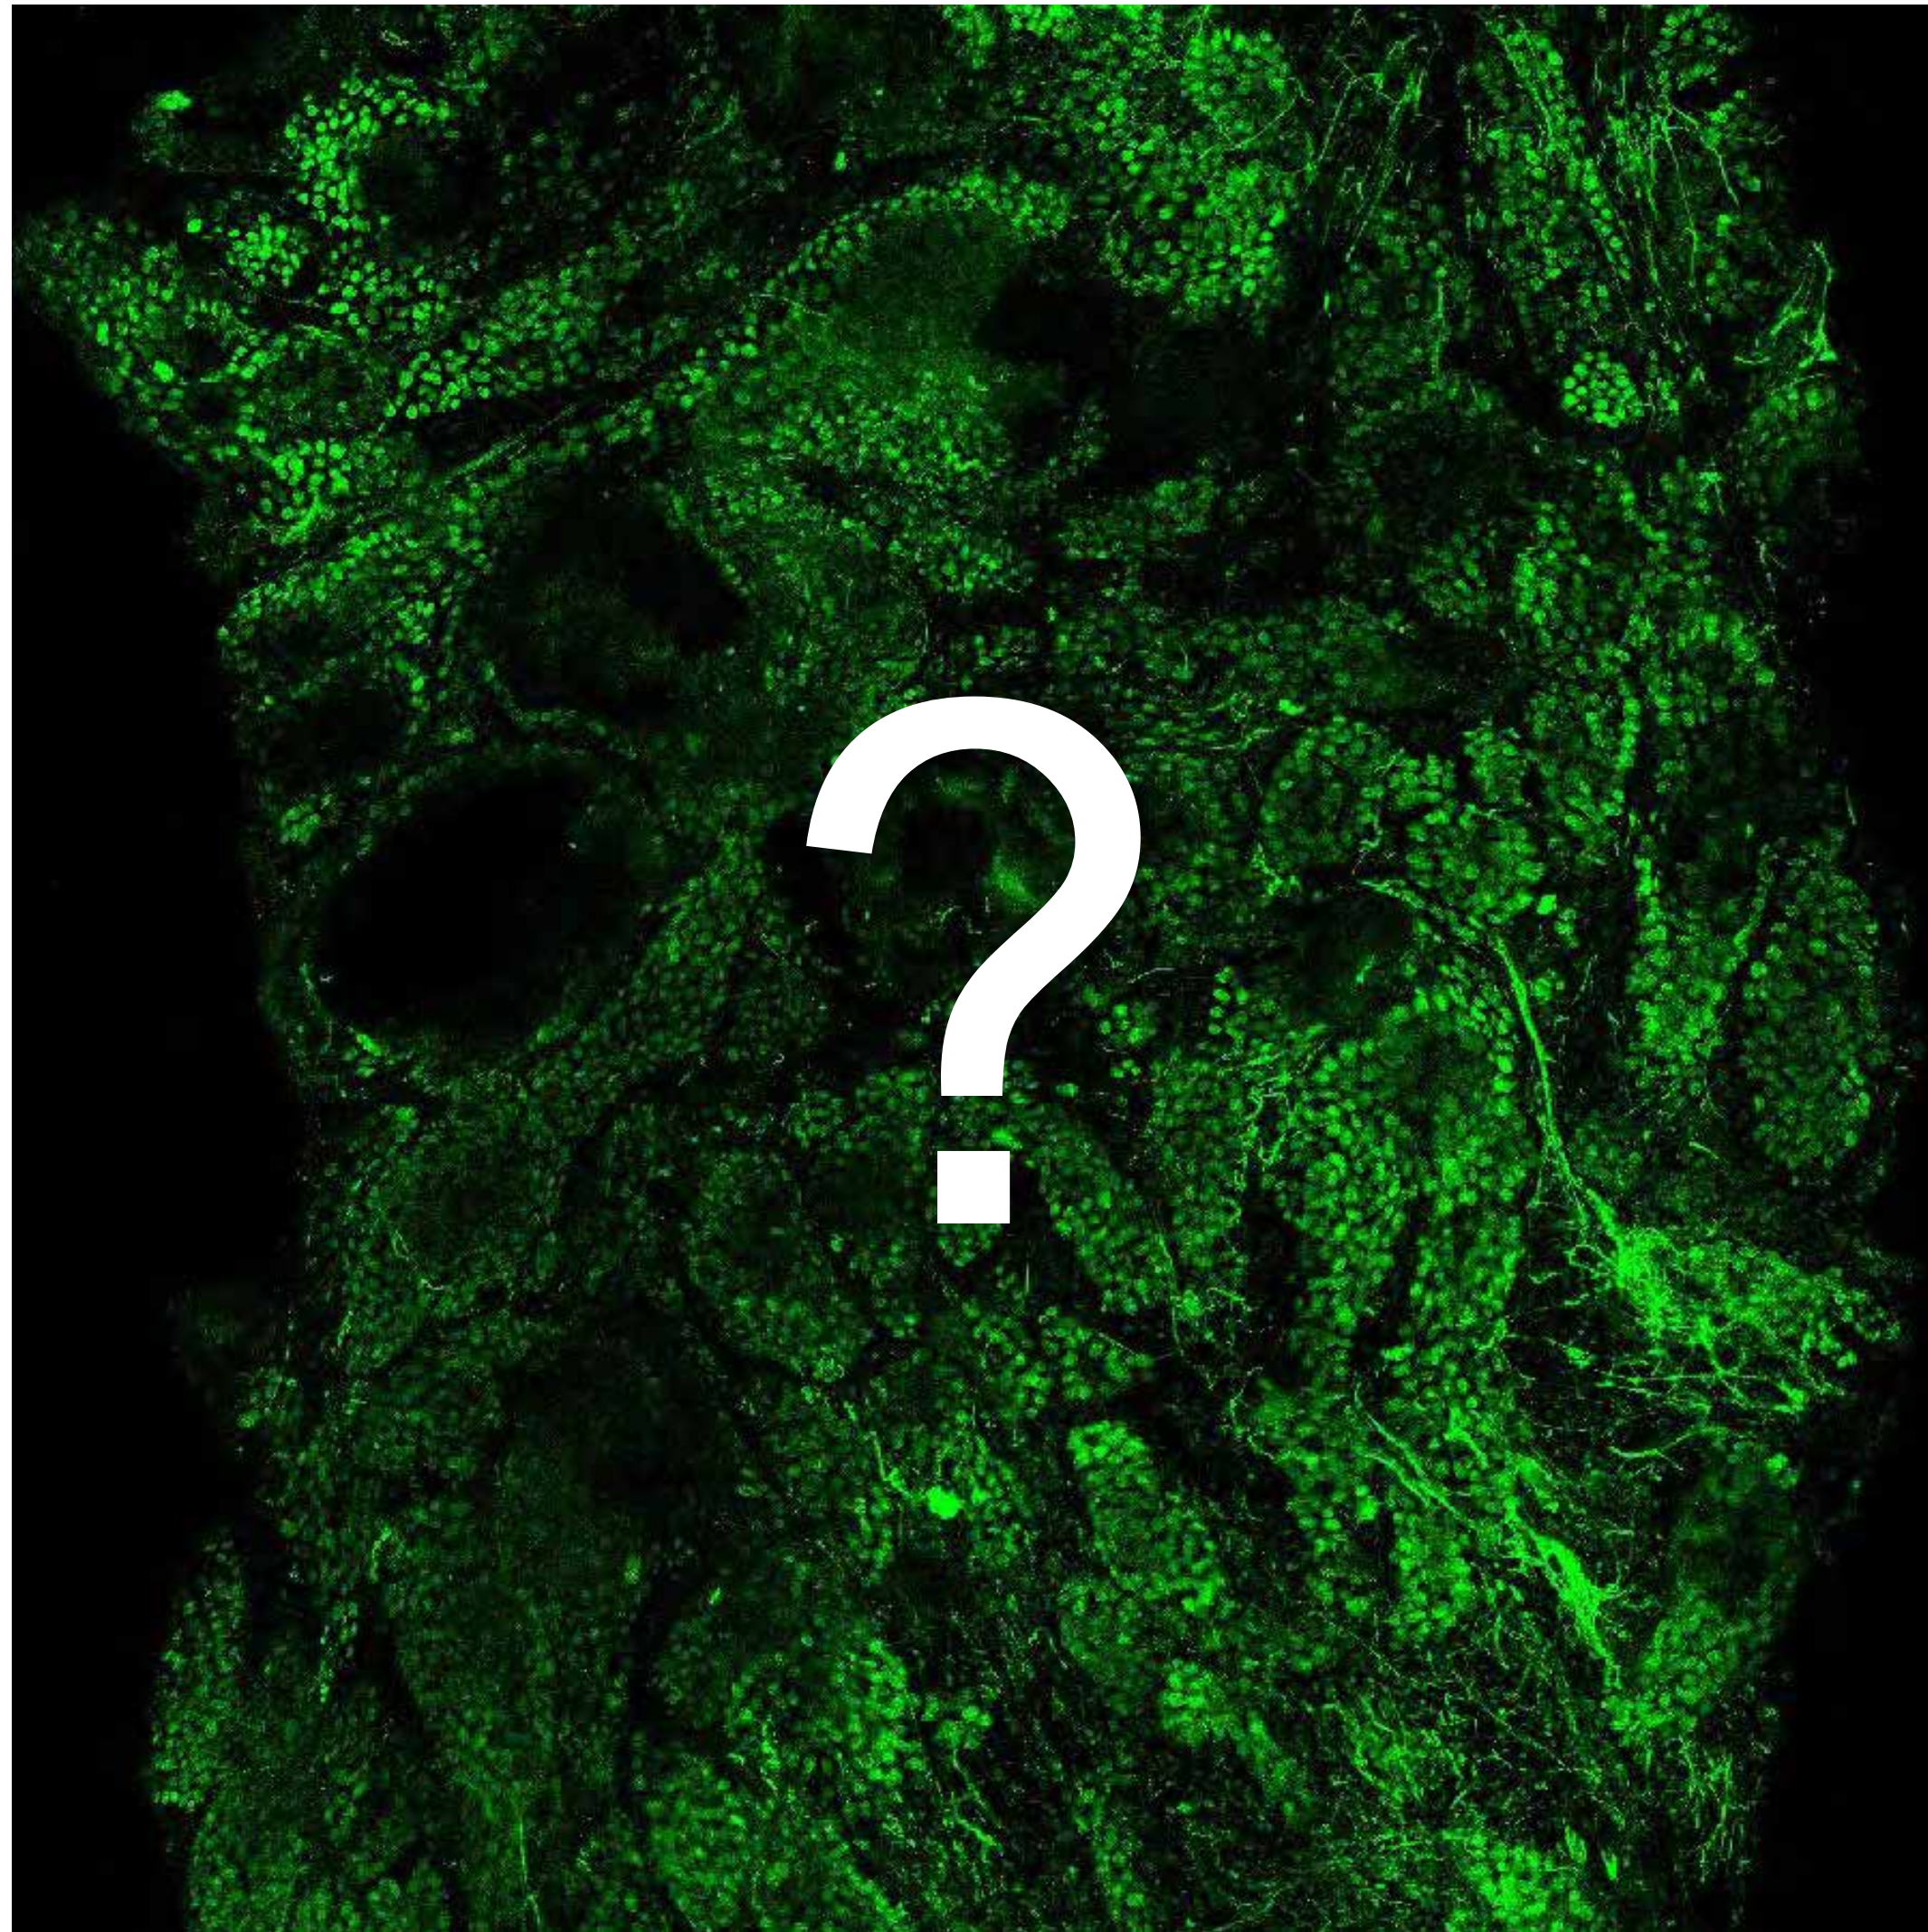

Tumor

Margin



5489

10

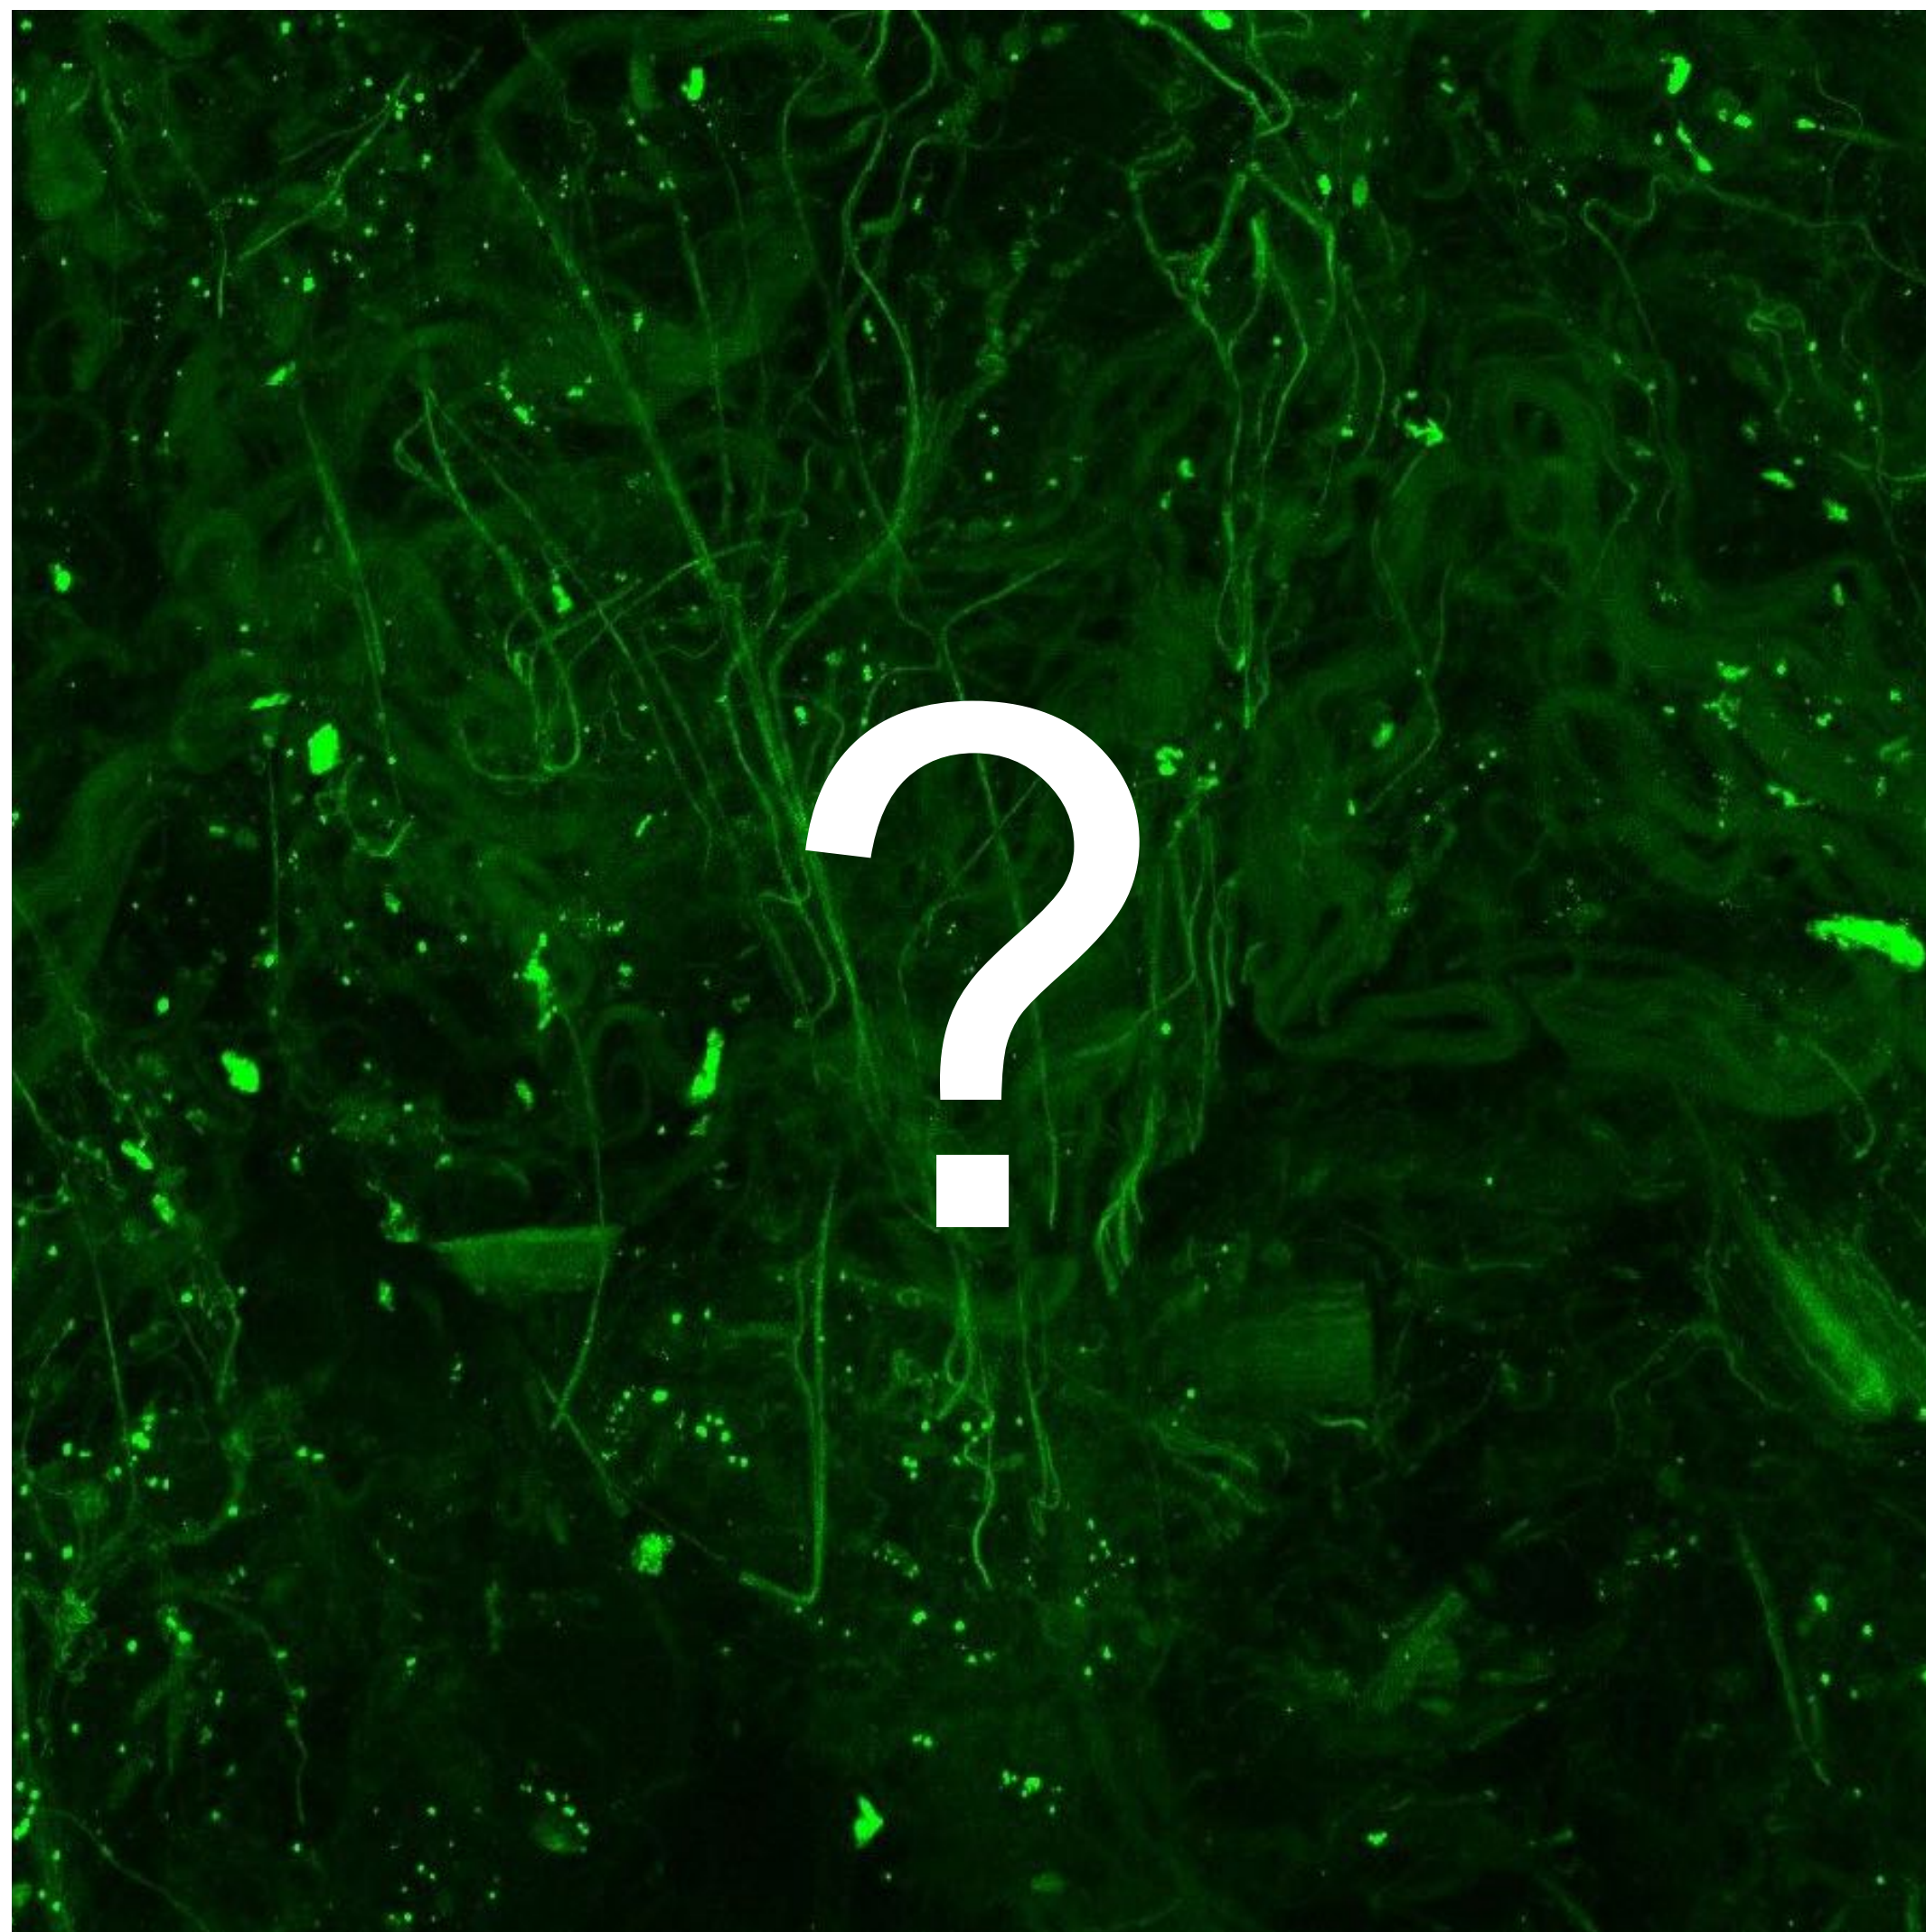

Tumor

Margin



6076

# Overview

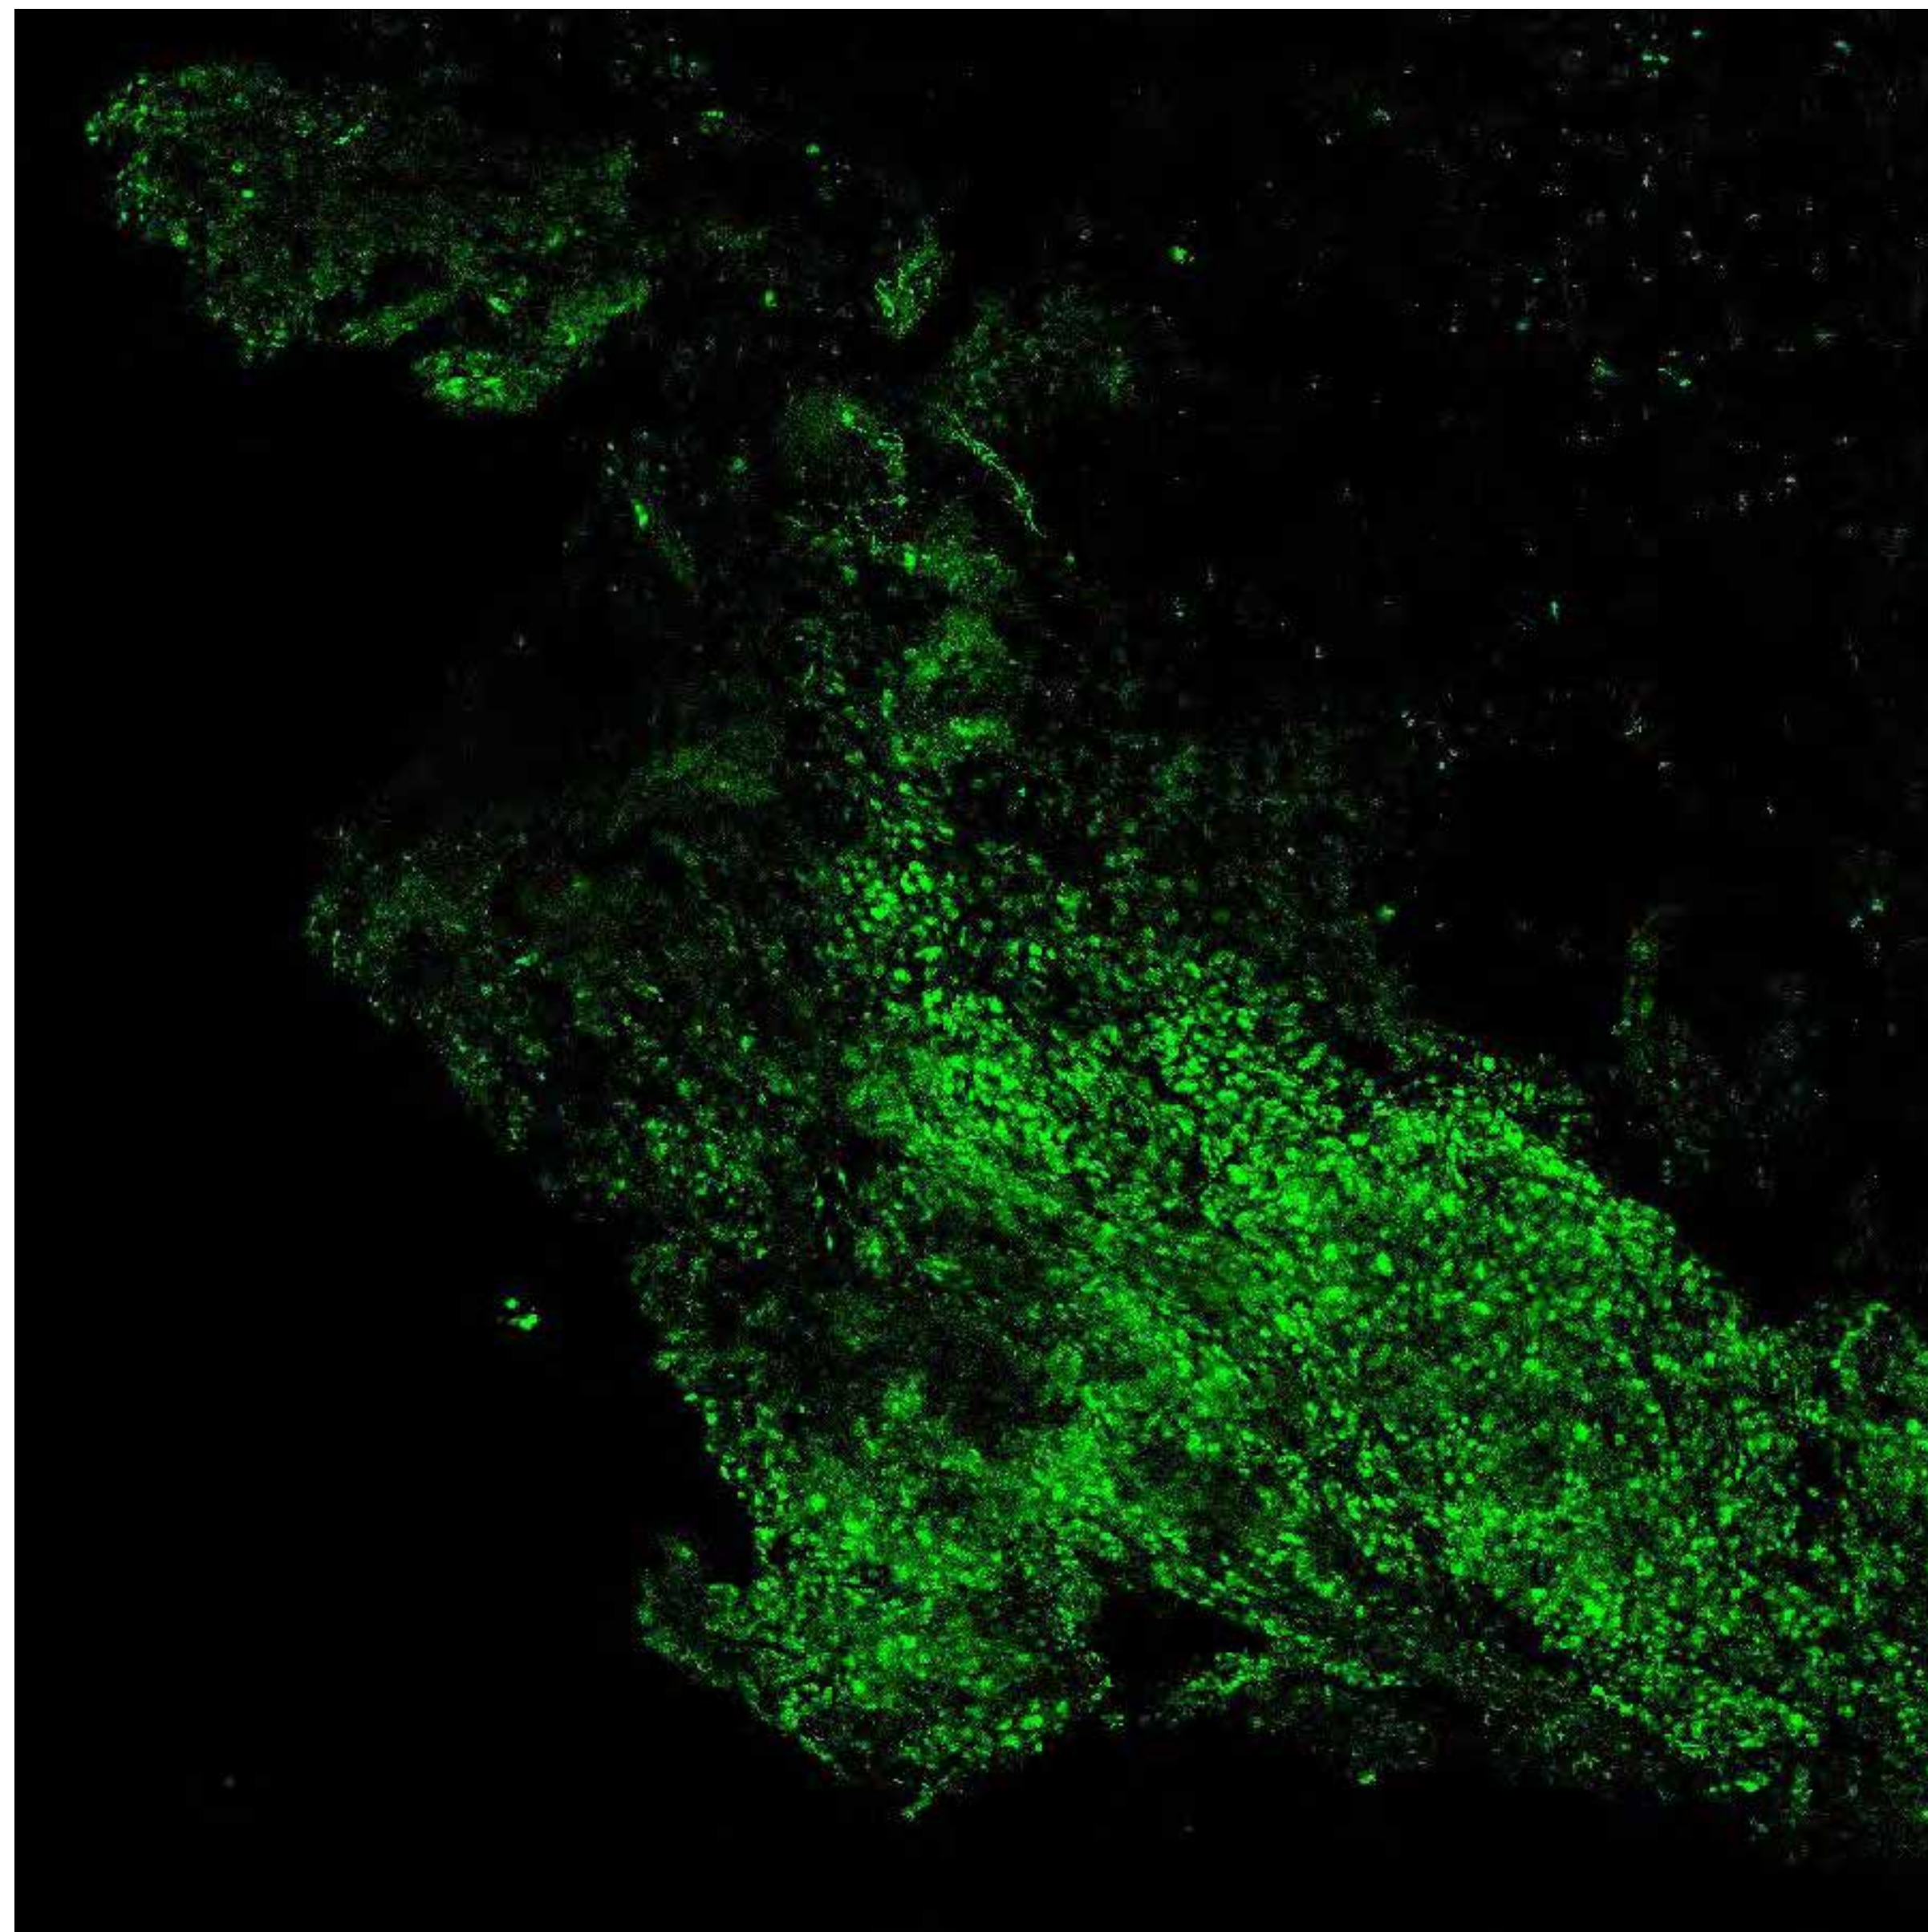

PARPi-FL only (green)

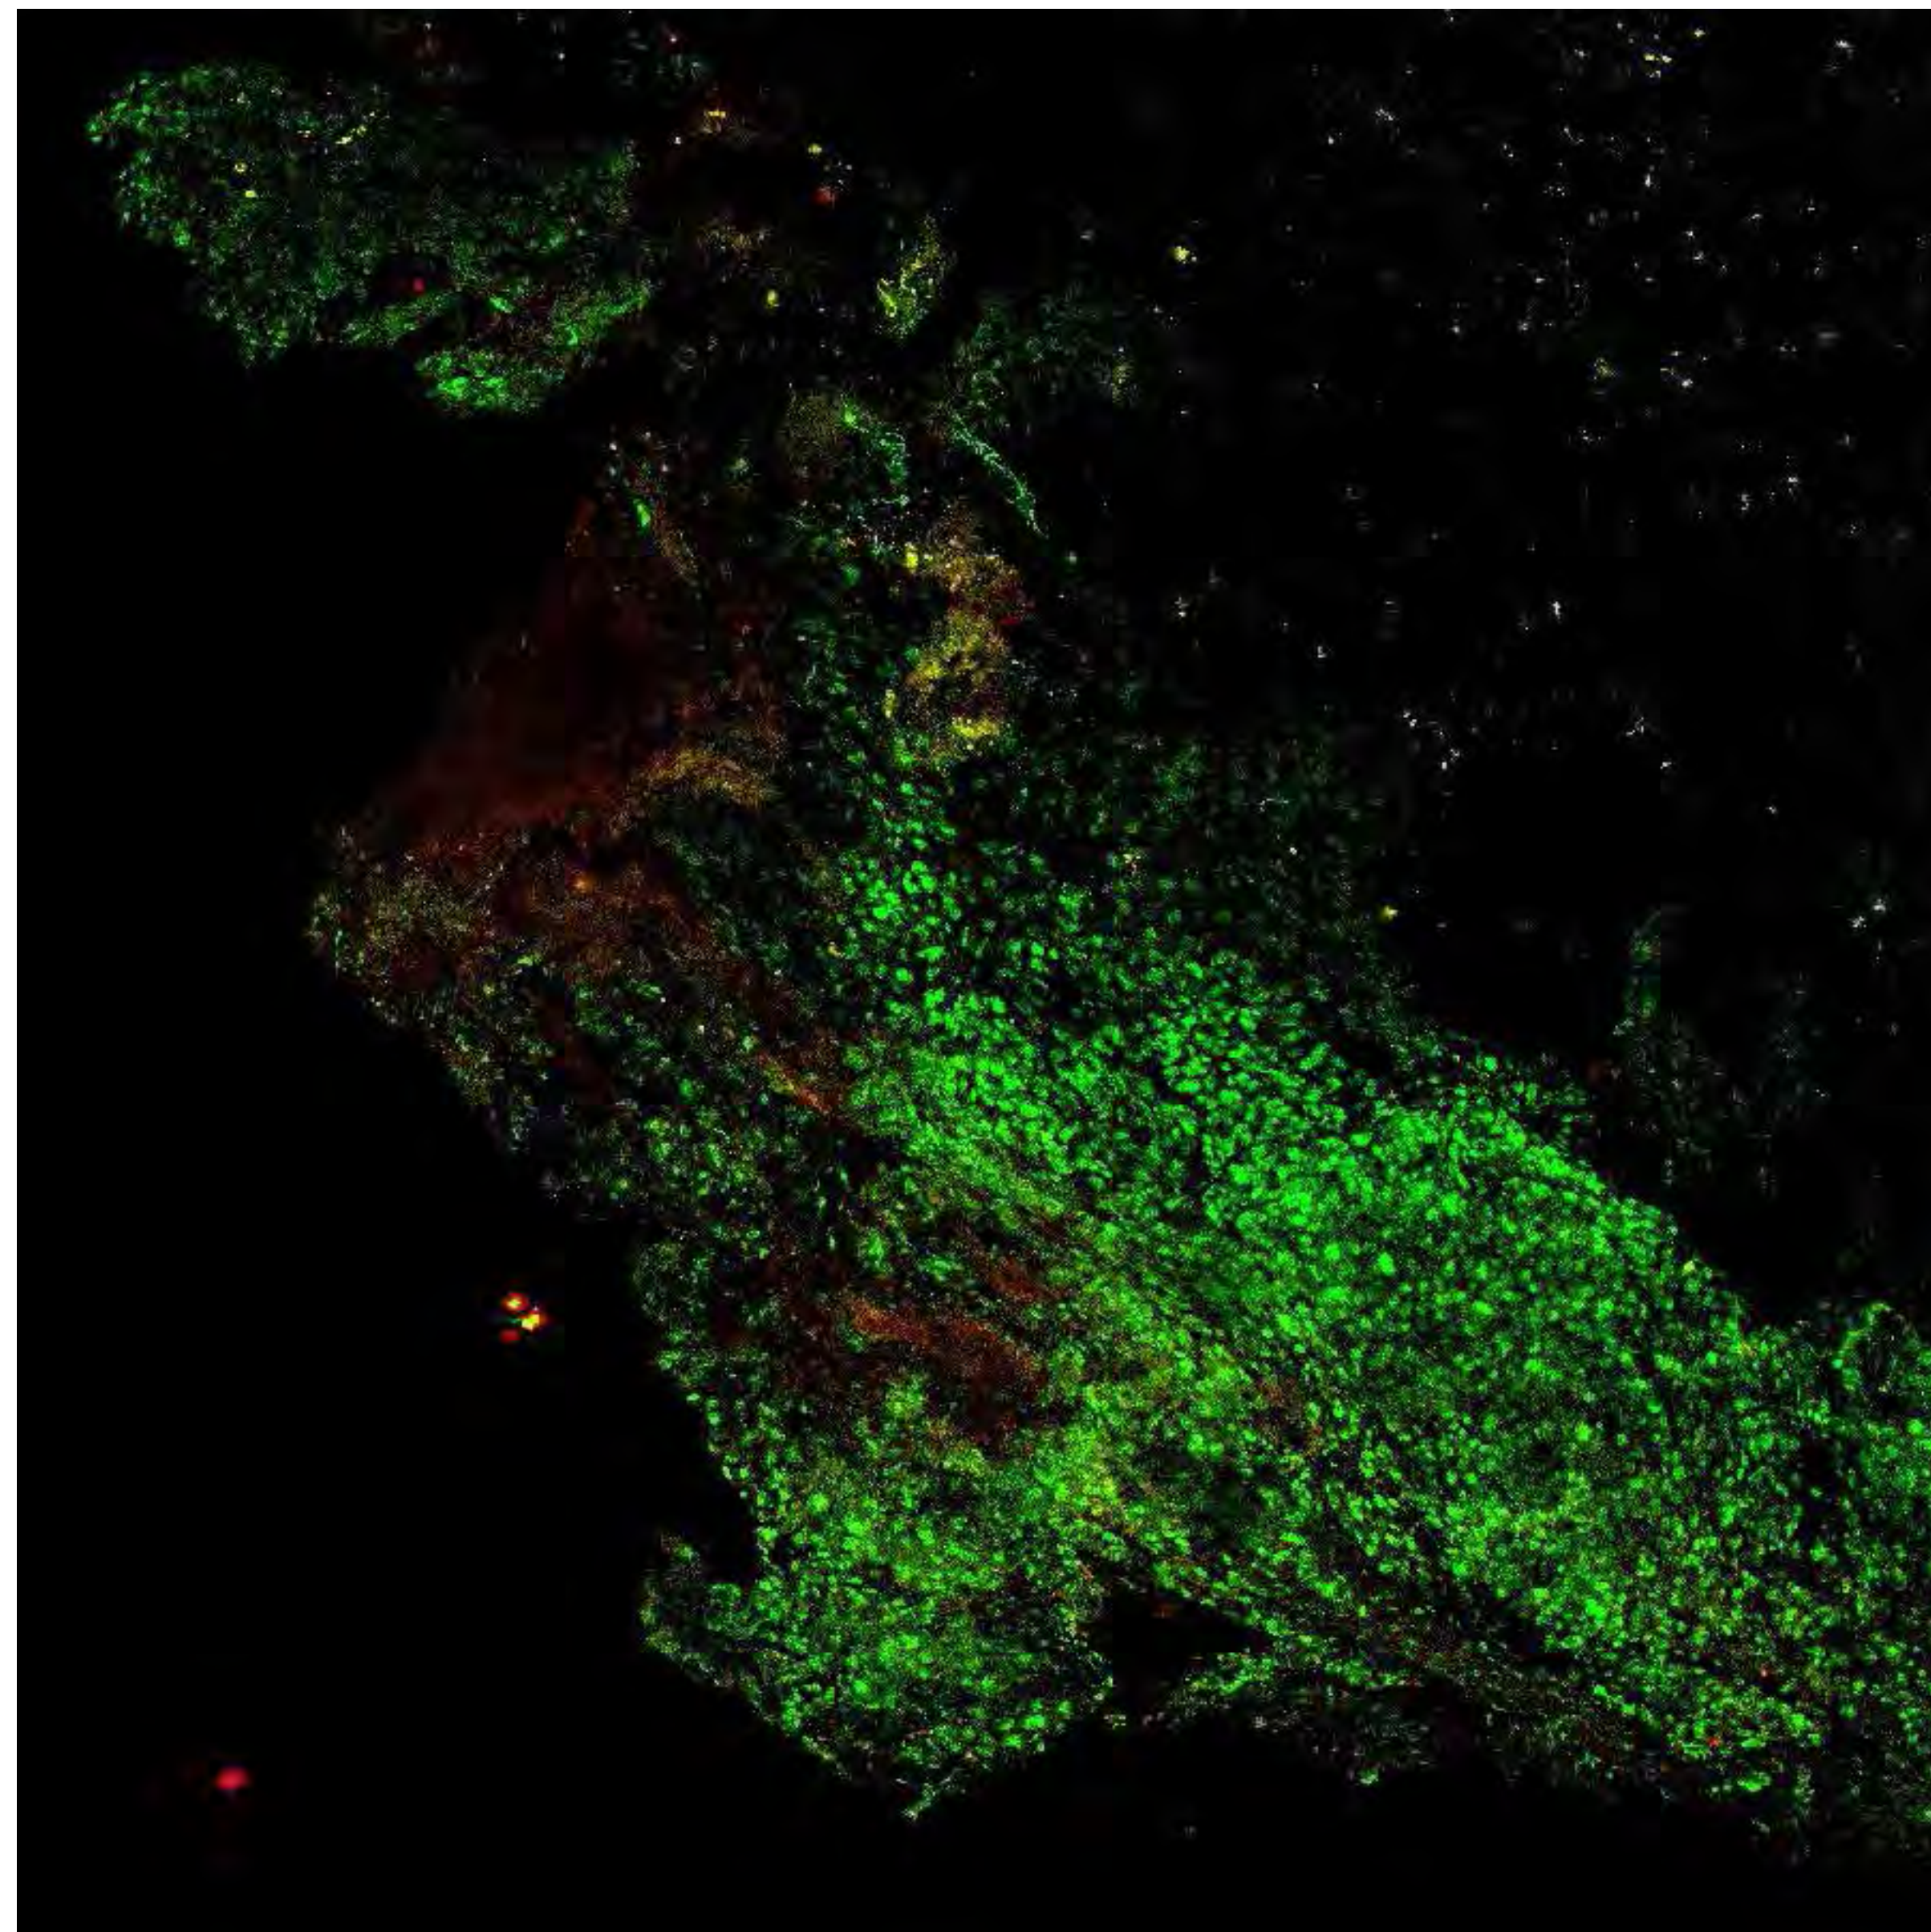

PARPi-FL (green) + Autofluorescence (red/yellow)



6076

Close-up

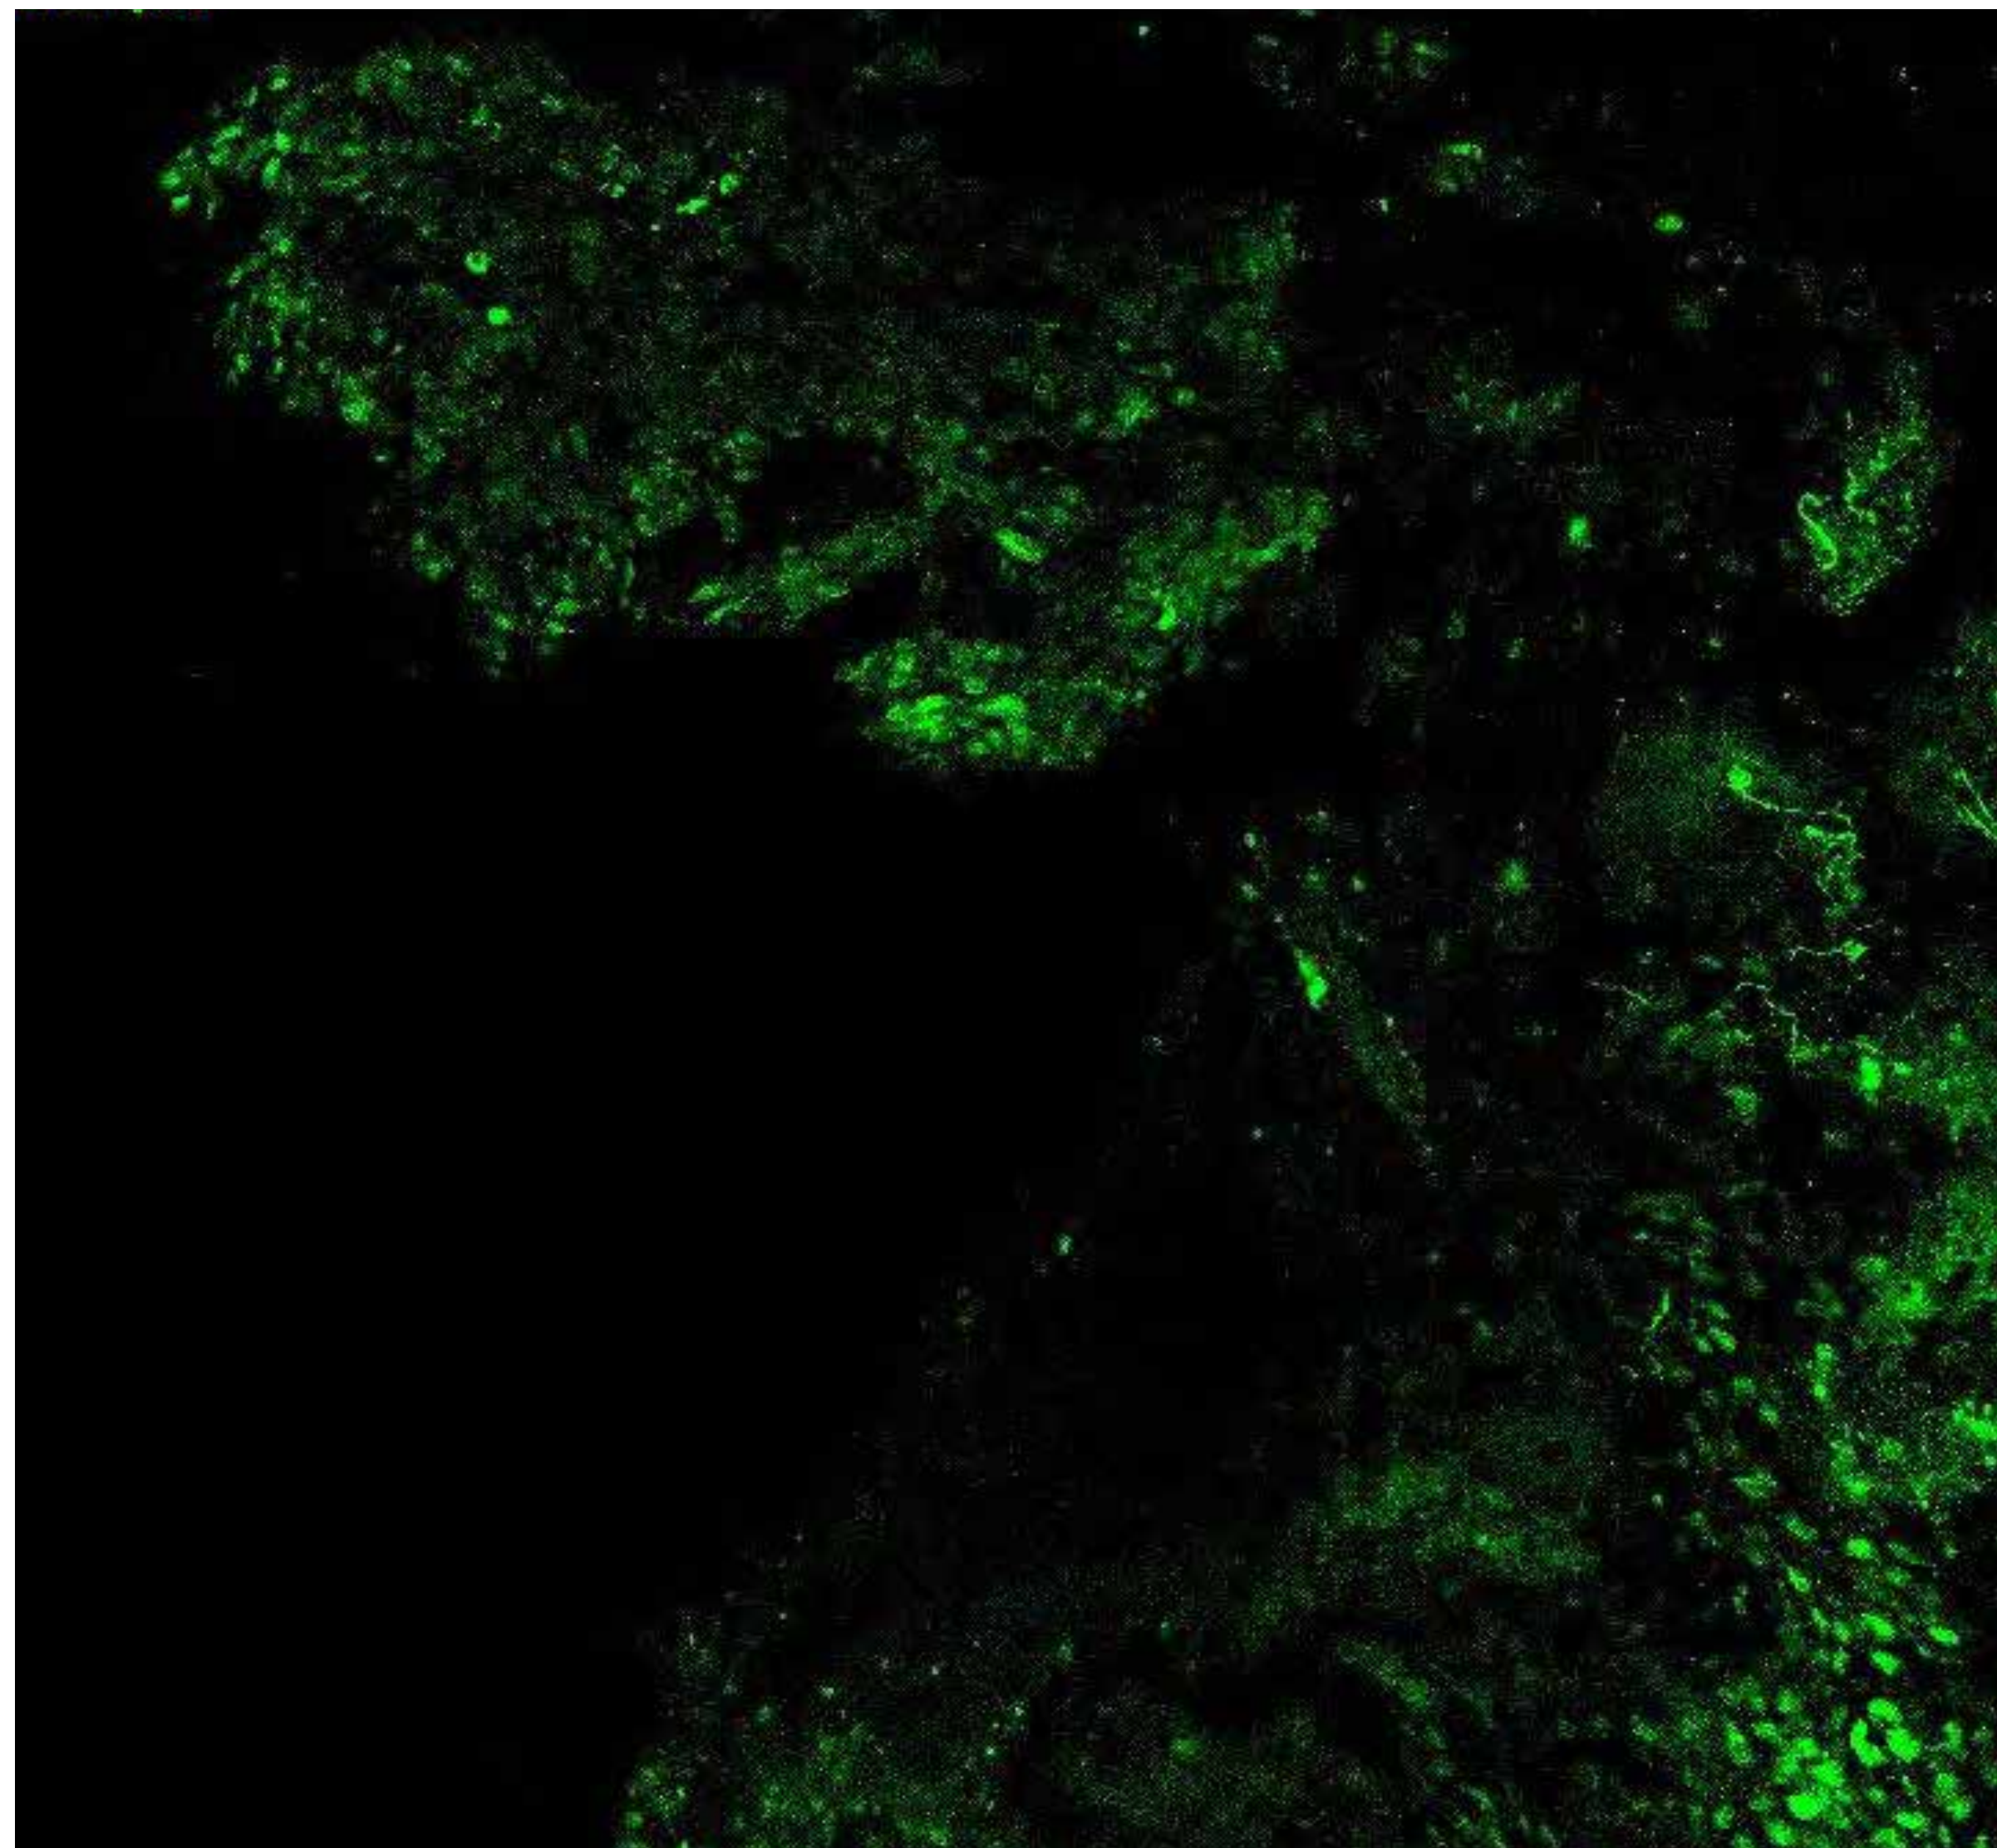

PARPi-FL only (green)

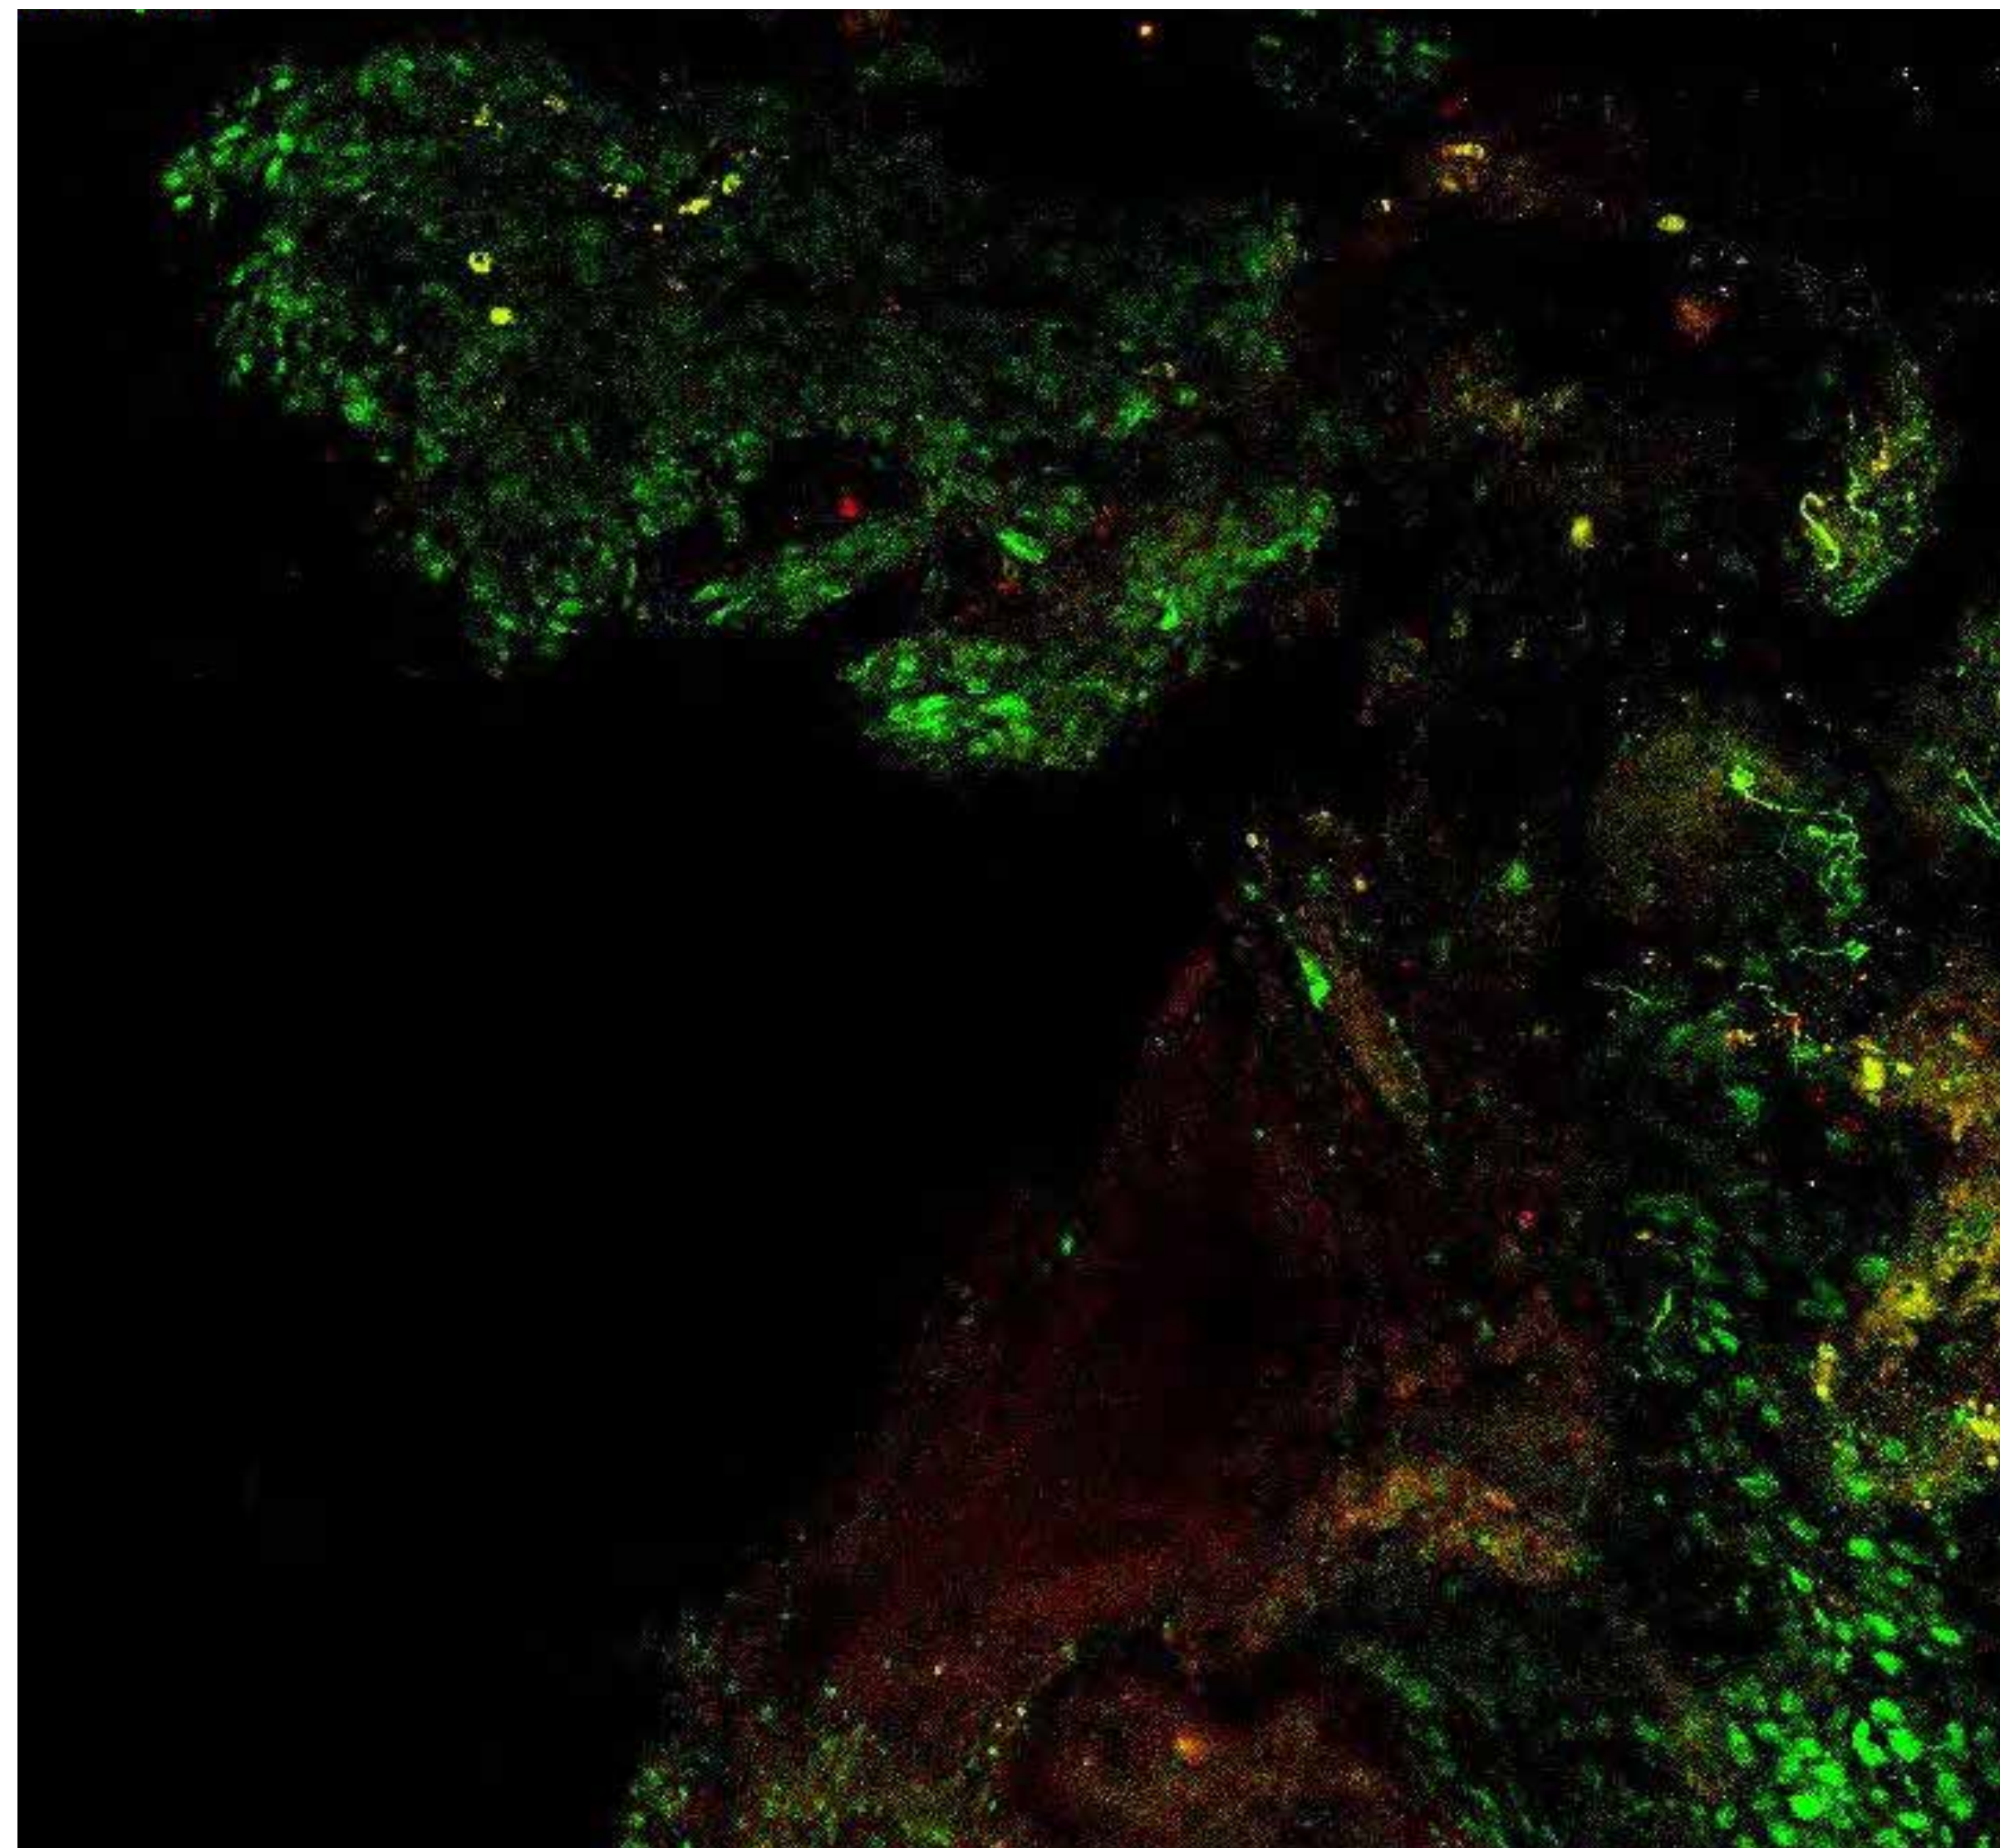

PARPi-FL (green) + Autofluorescence (red/yellow)



6076

Close-up

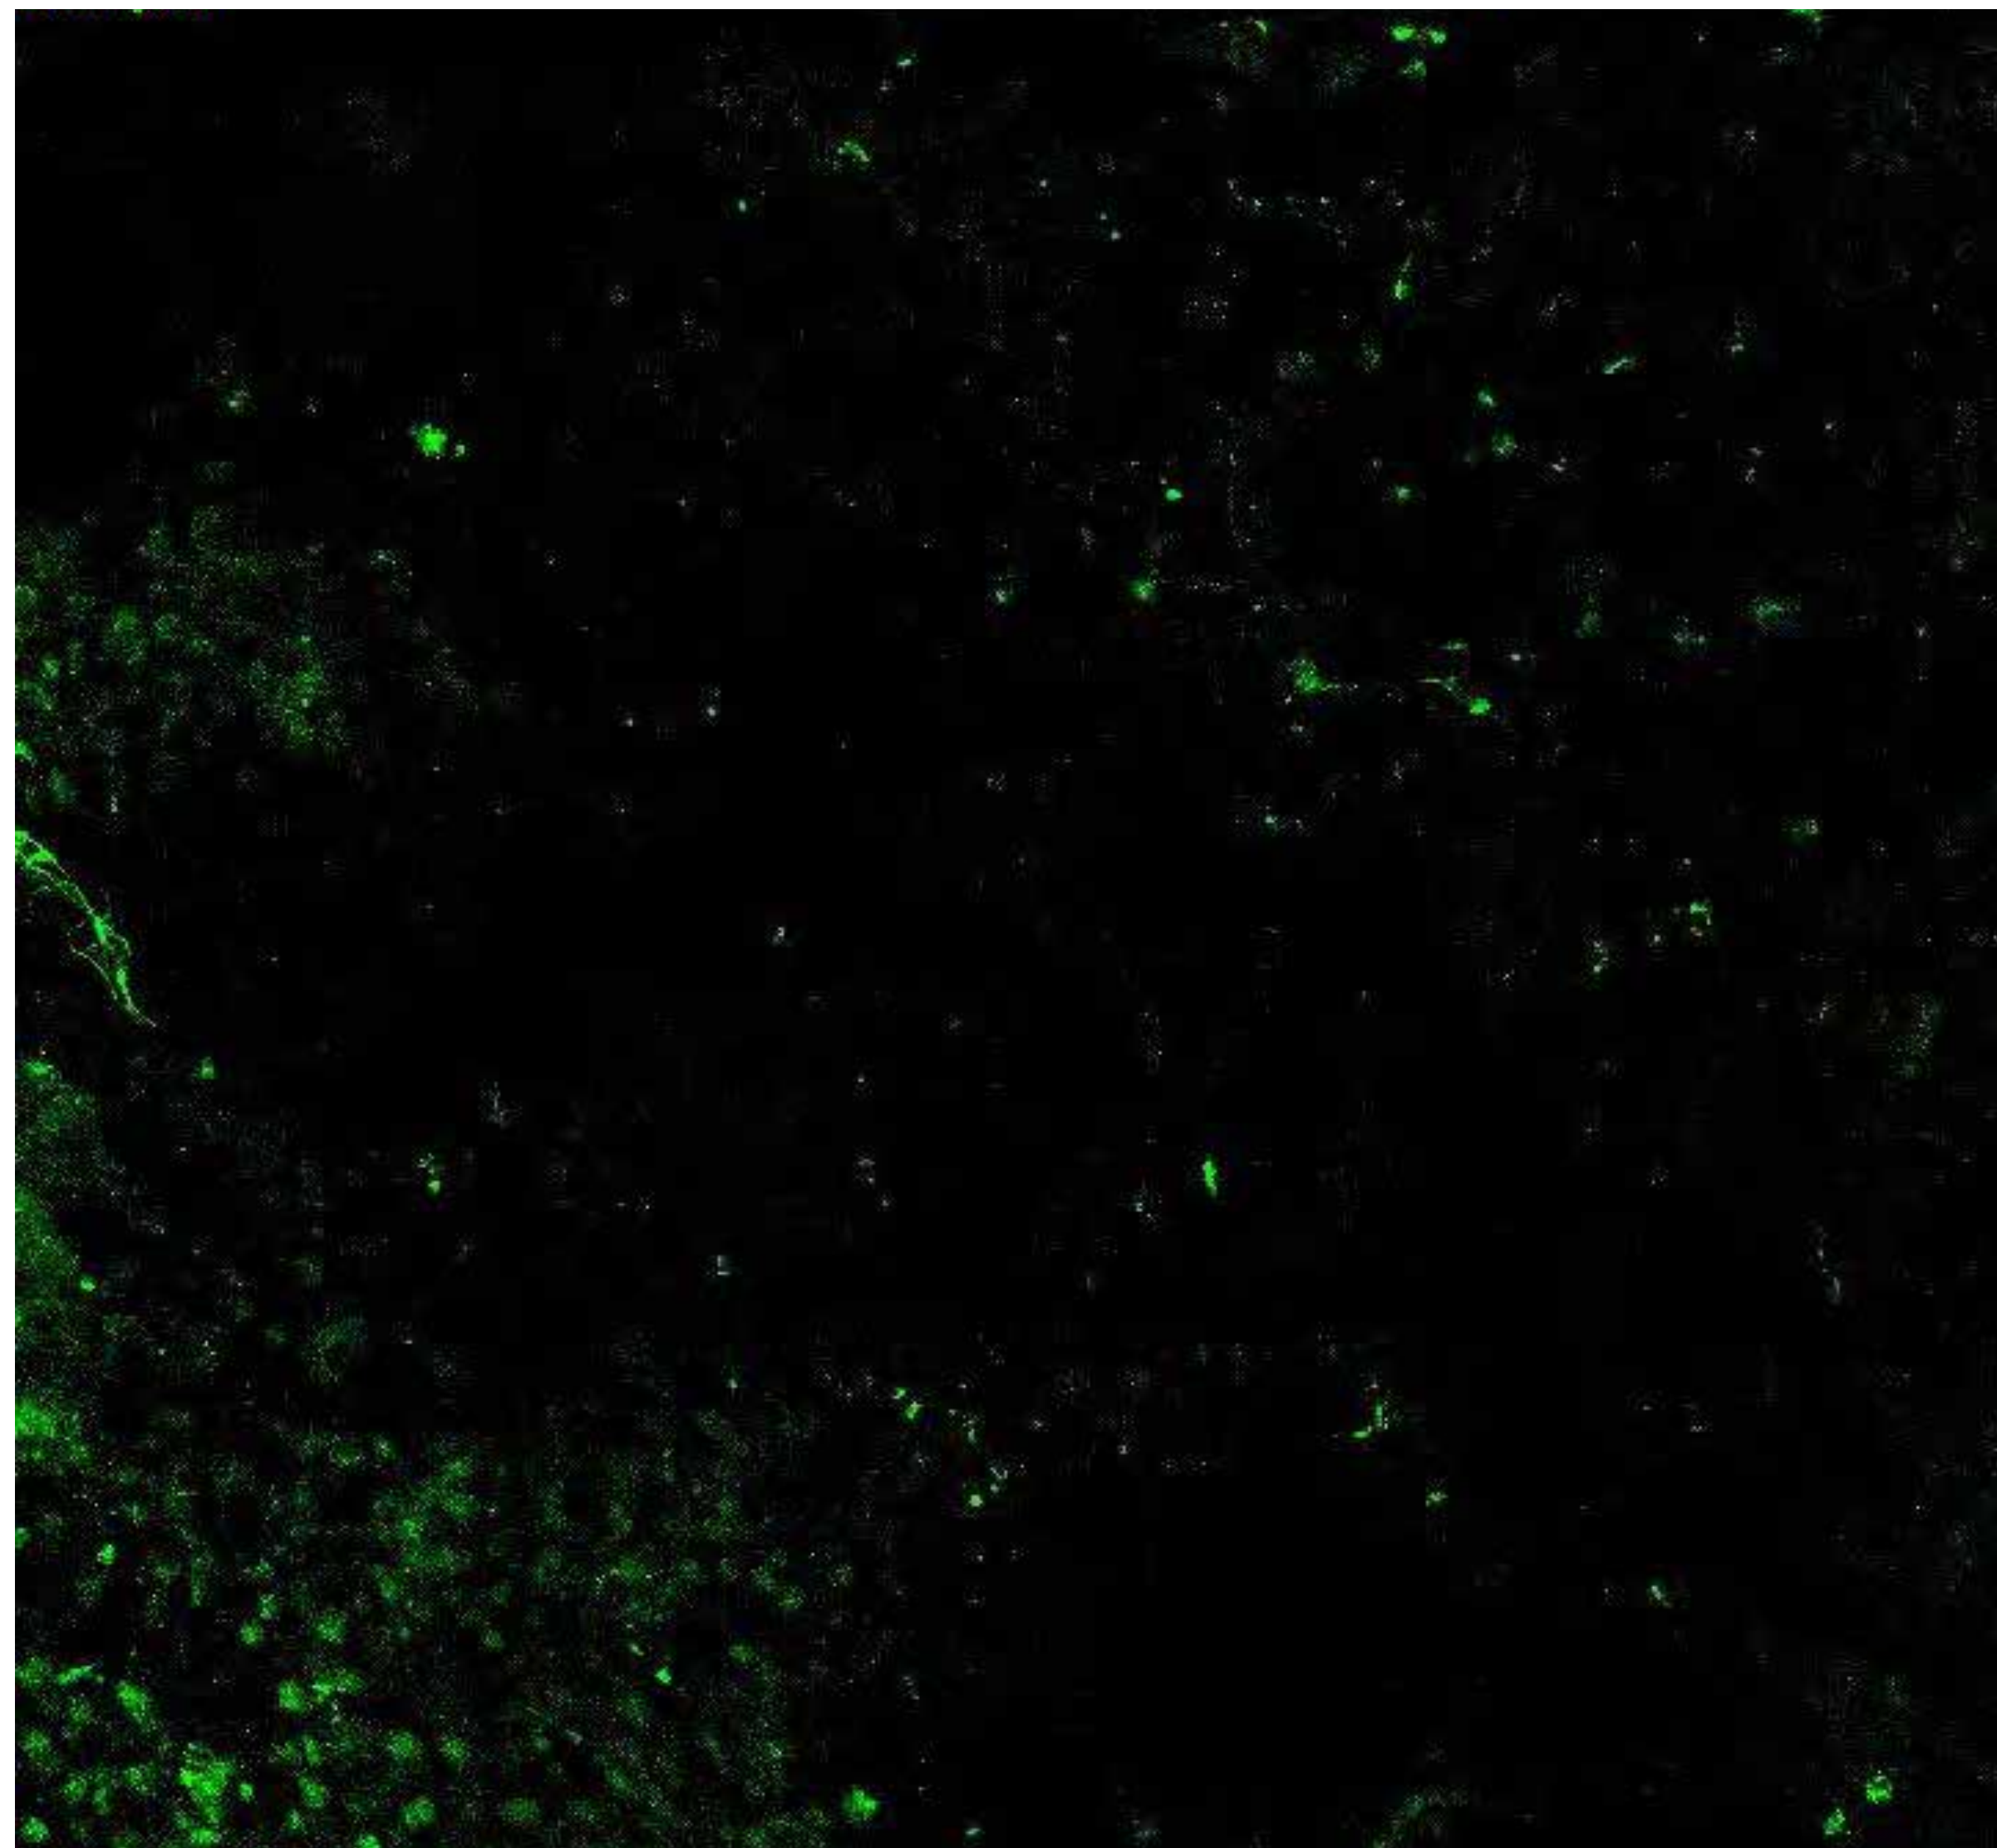

PARPi-FL only (green)

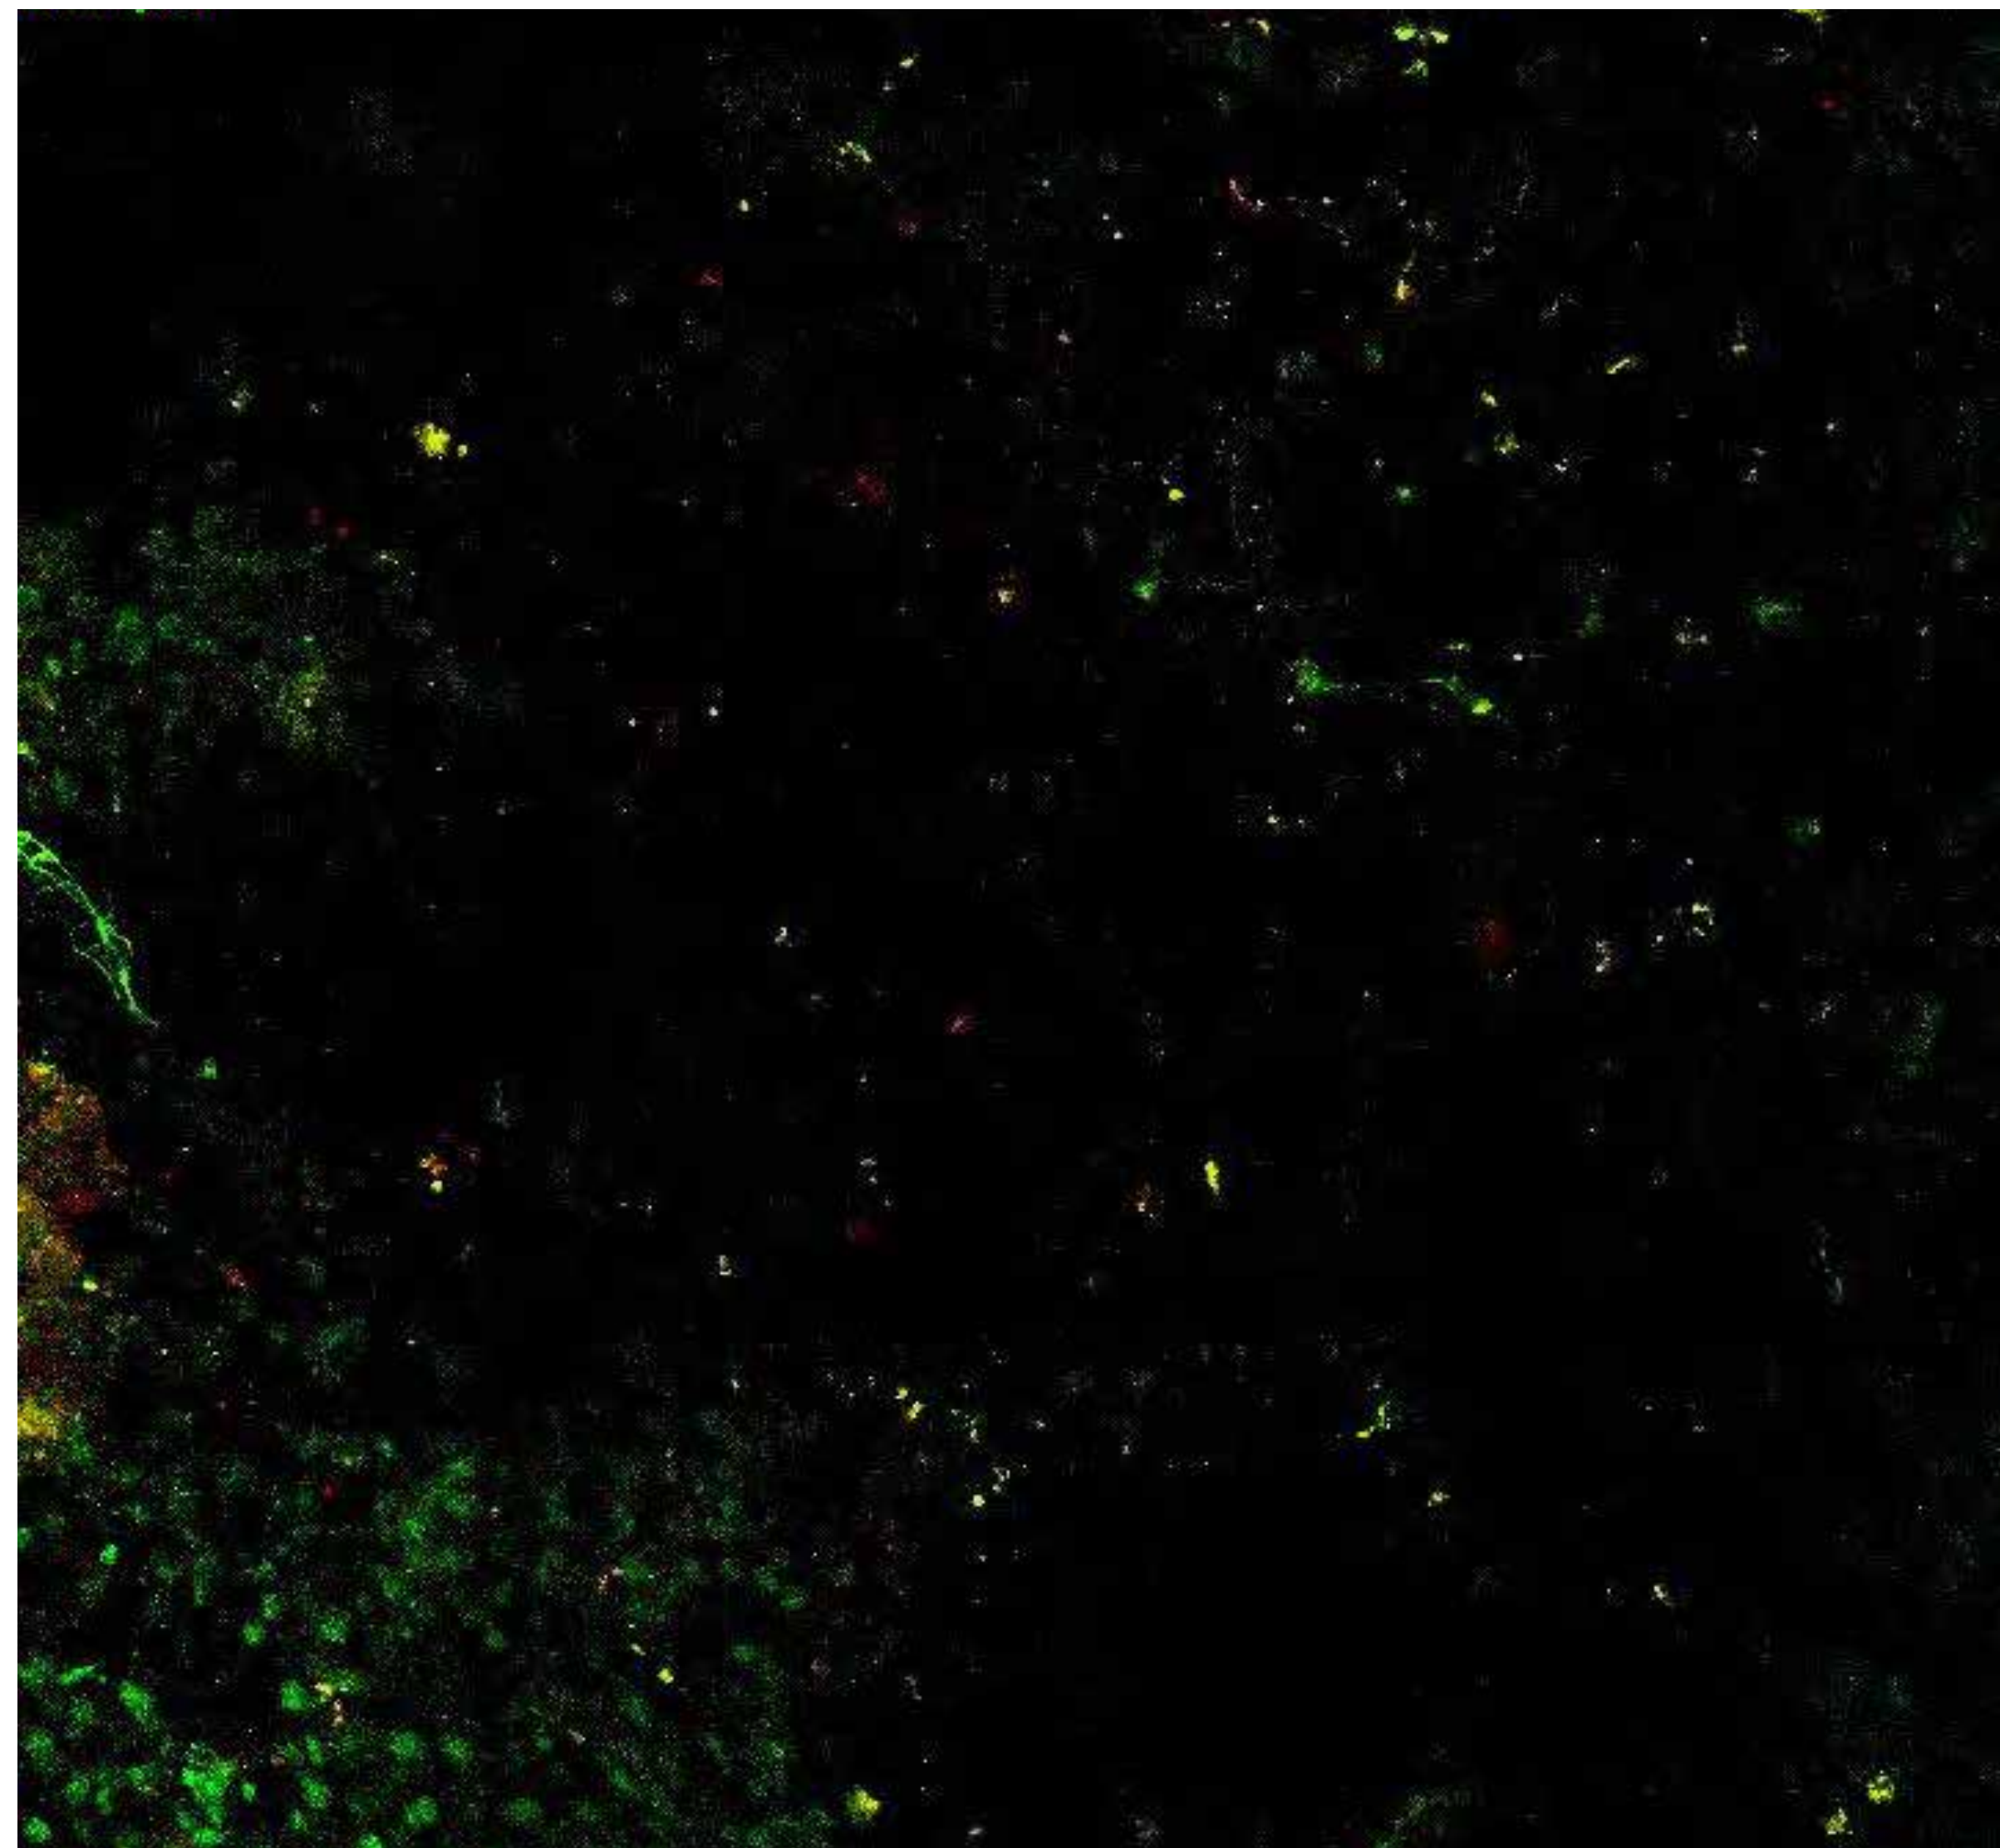

PARPi-FL (green) + Autofluorescence (red/yellow)



6076

Close-up

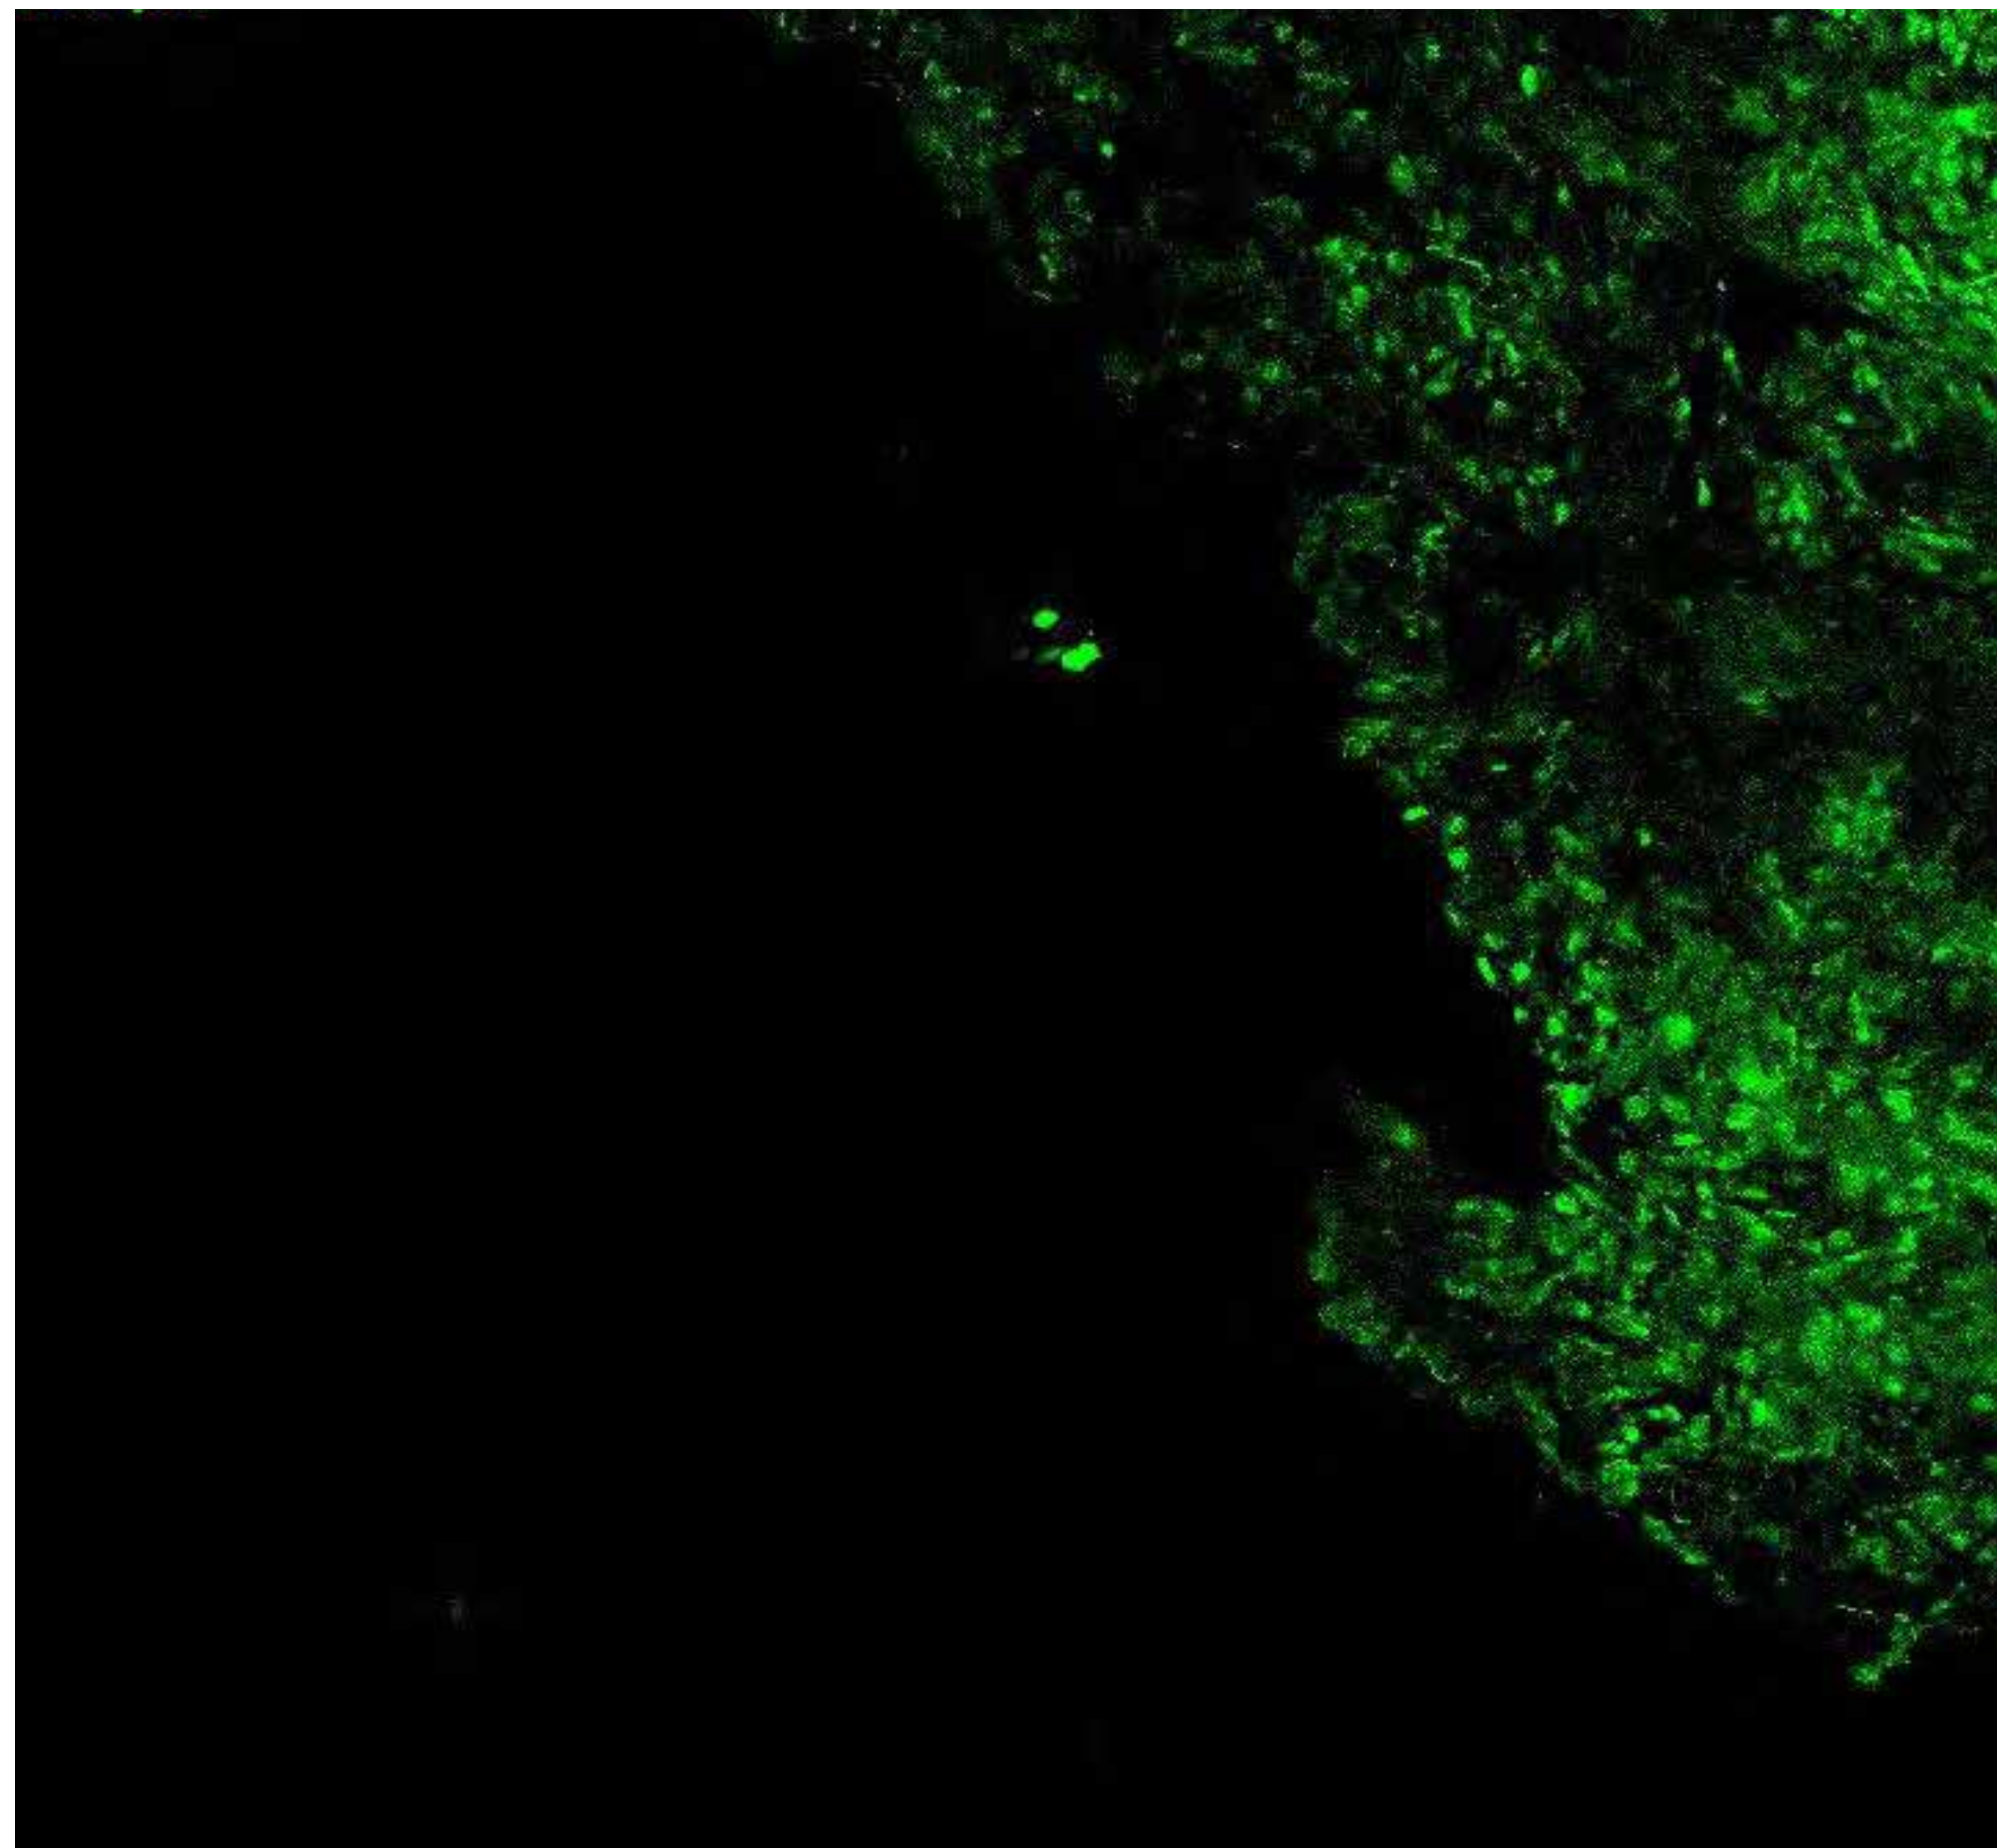

PARPi-FL only (green)

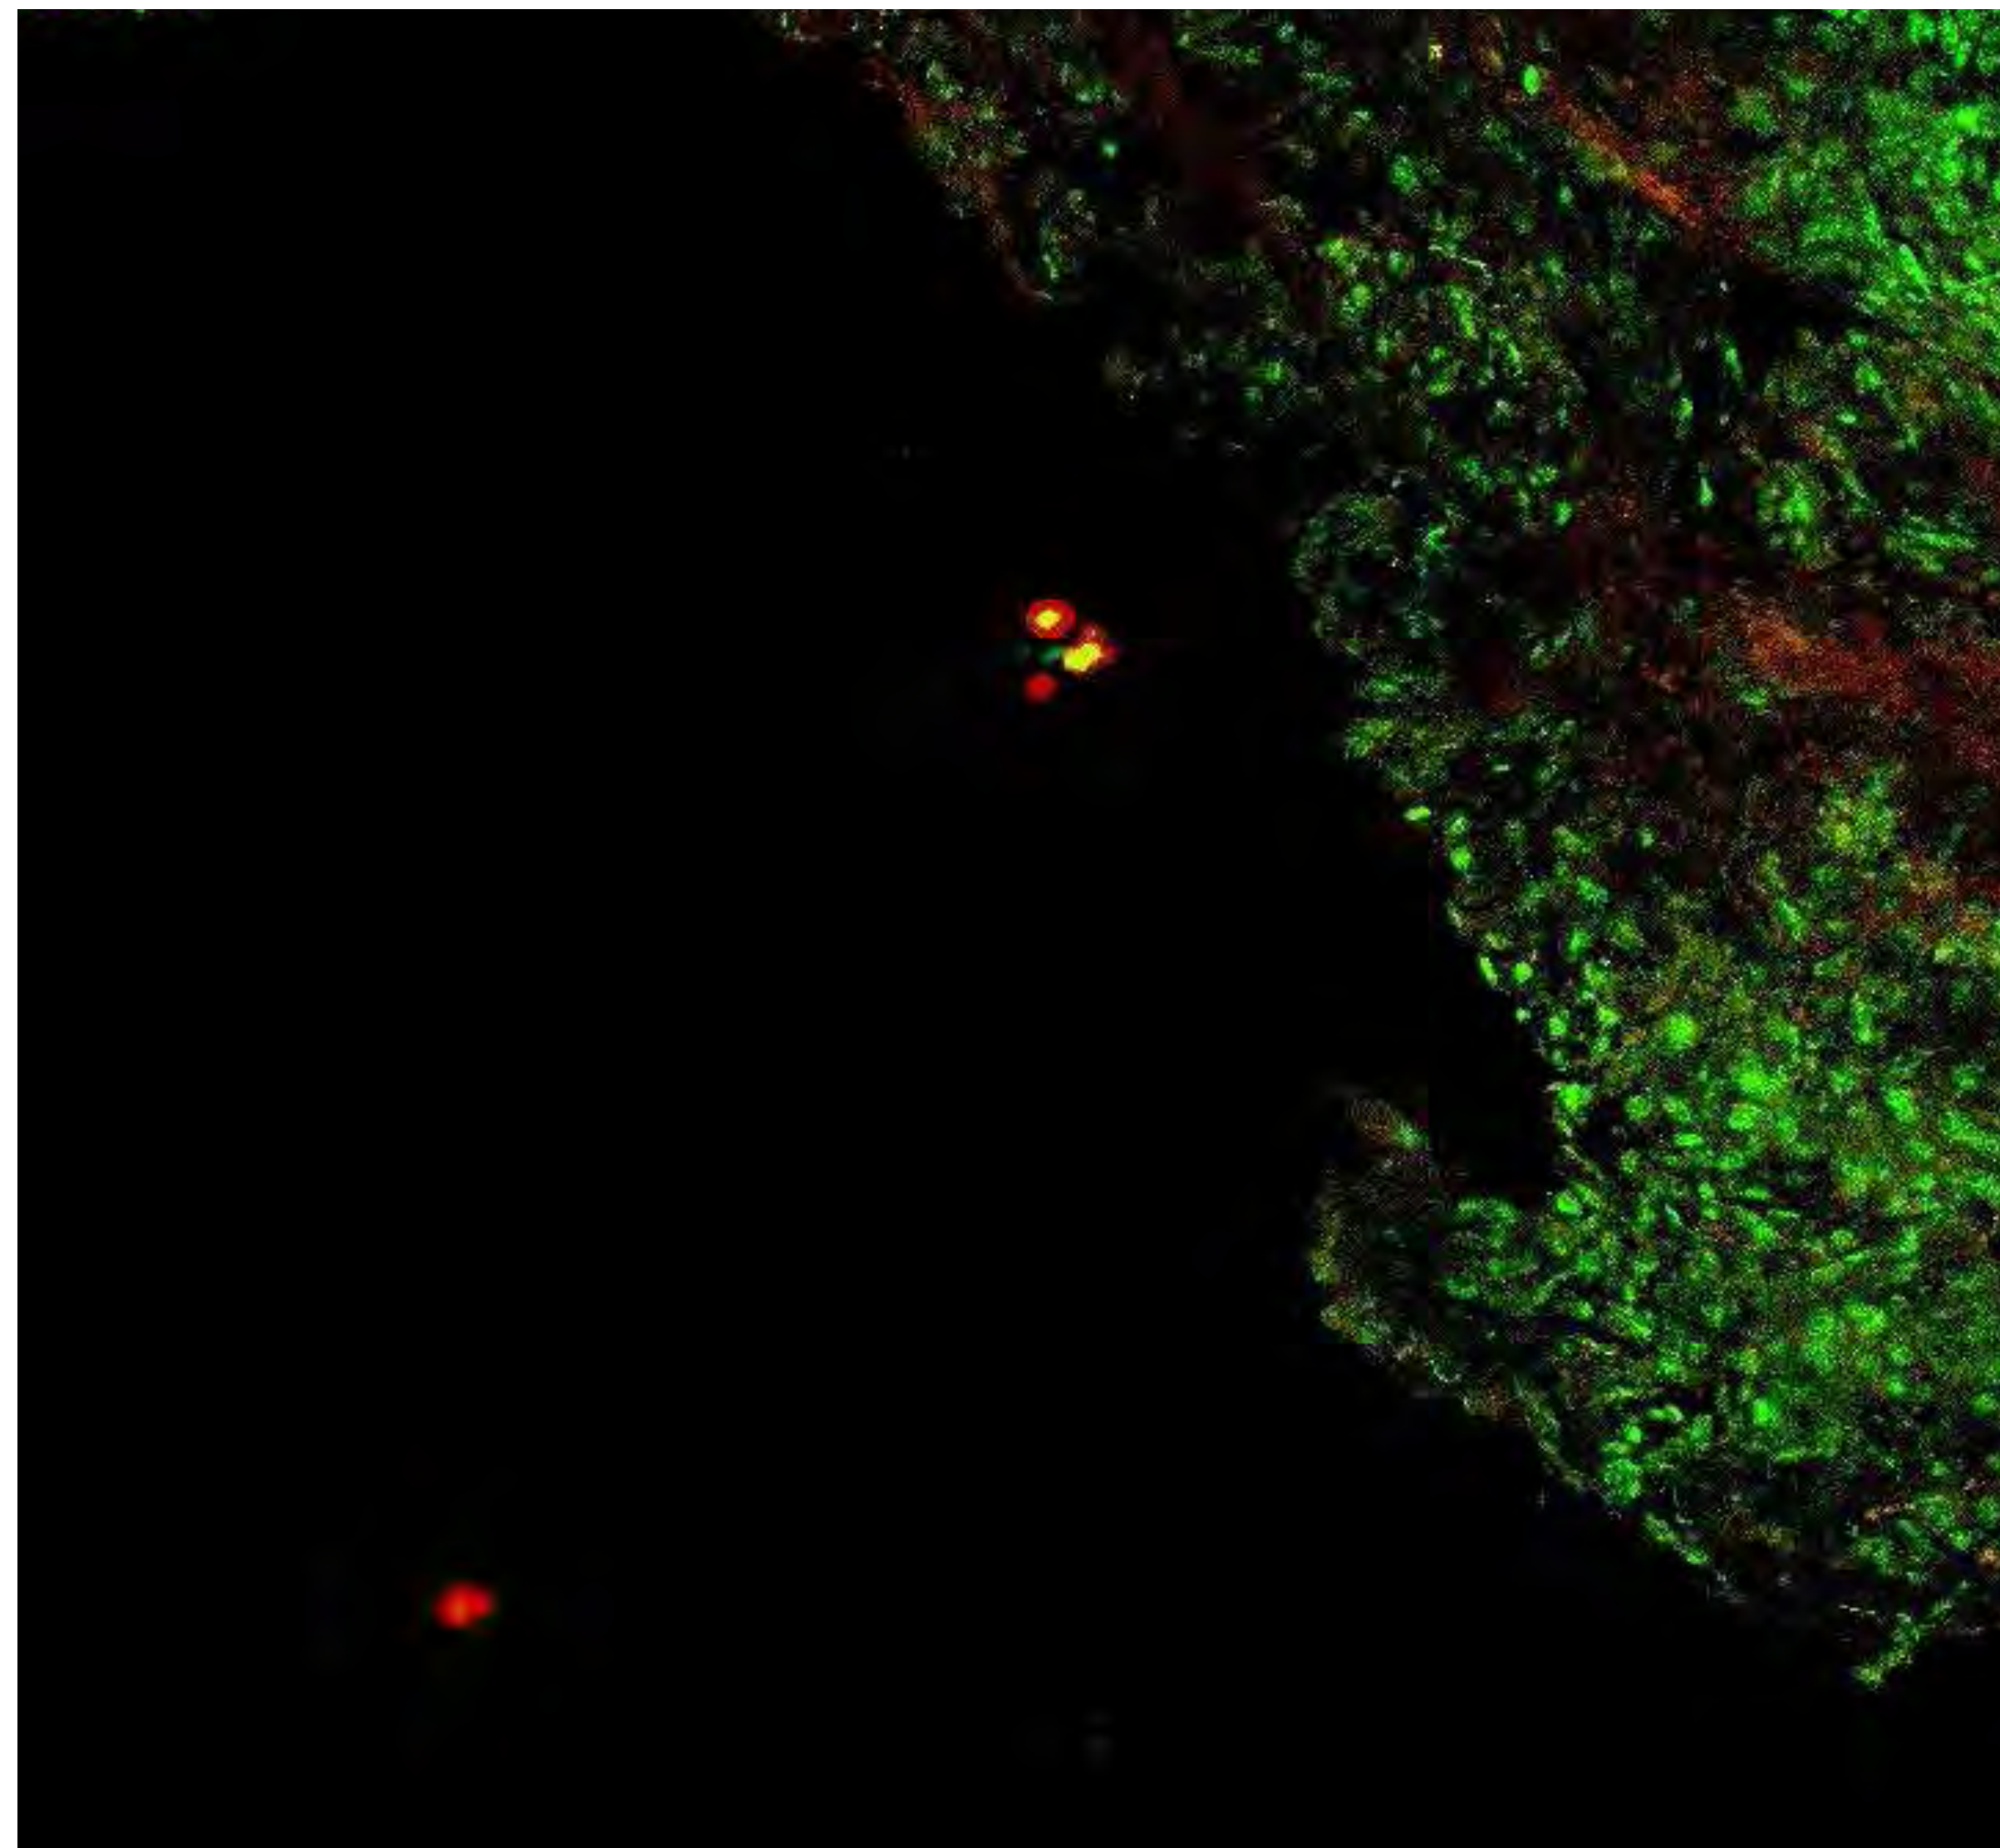

PARPi-FL (green) + Autofluorescence (red/yellow)



6076

Close-up

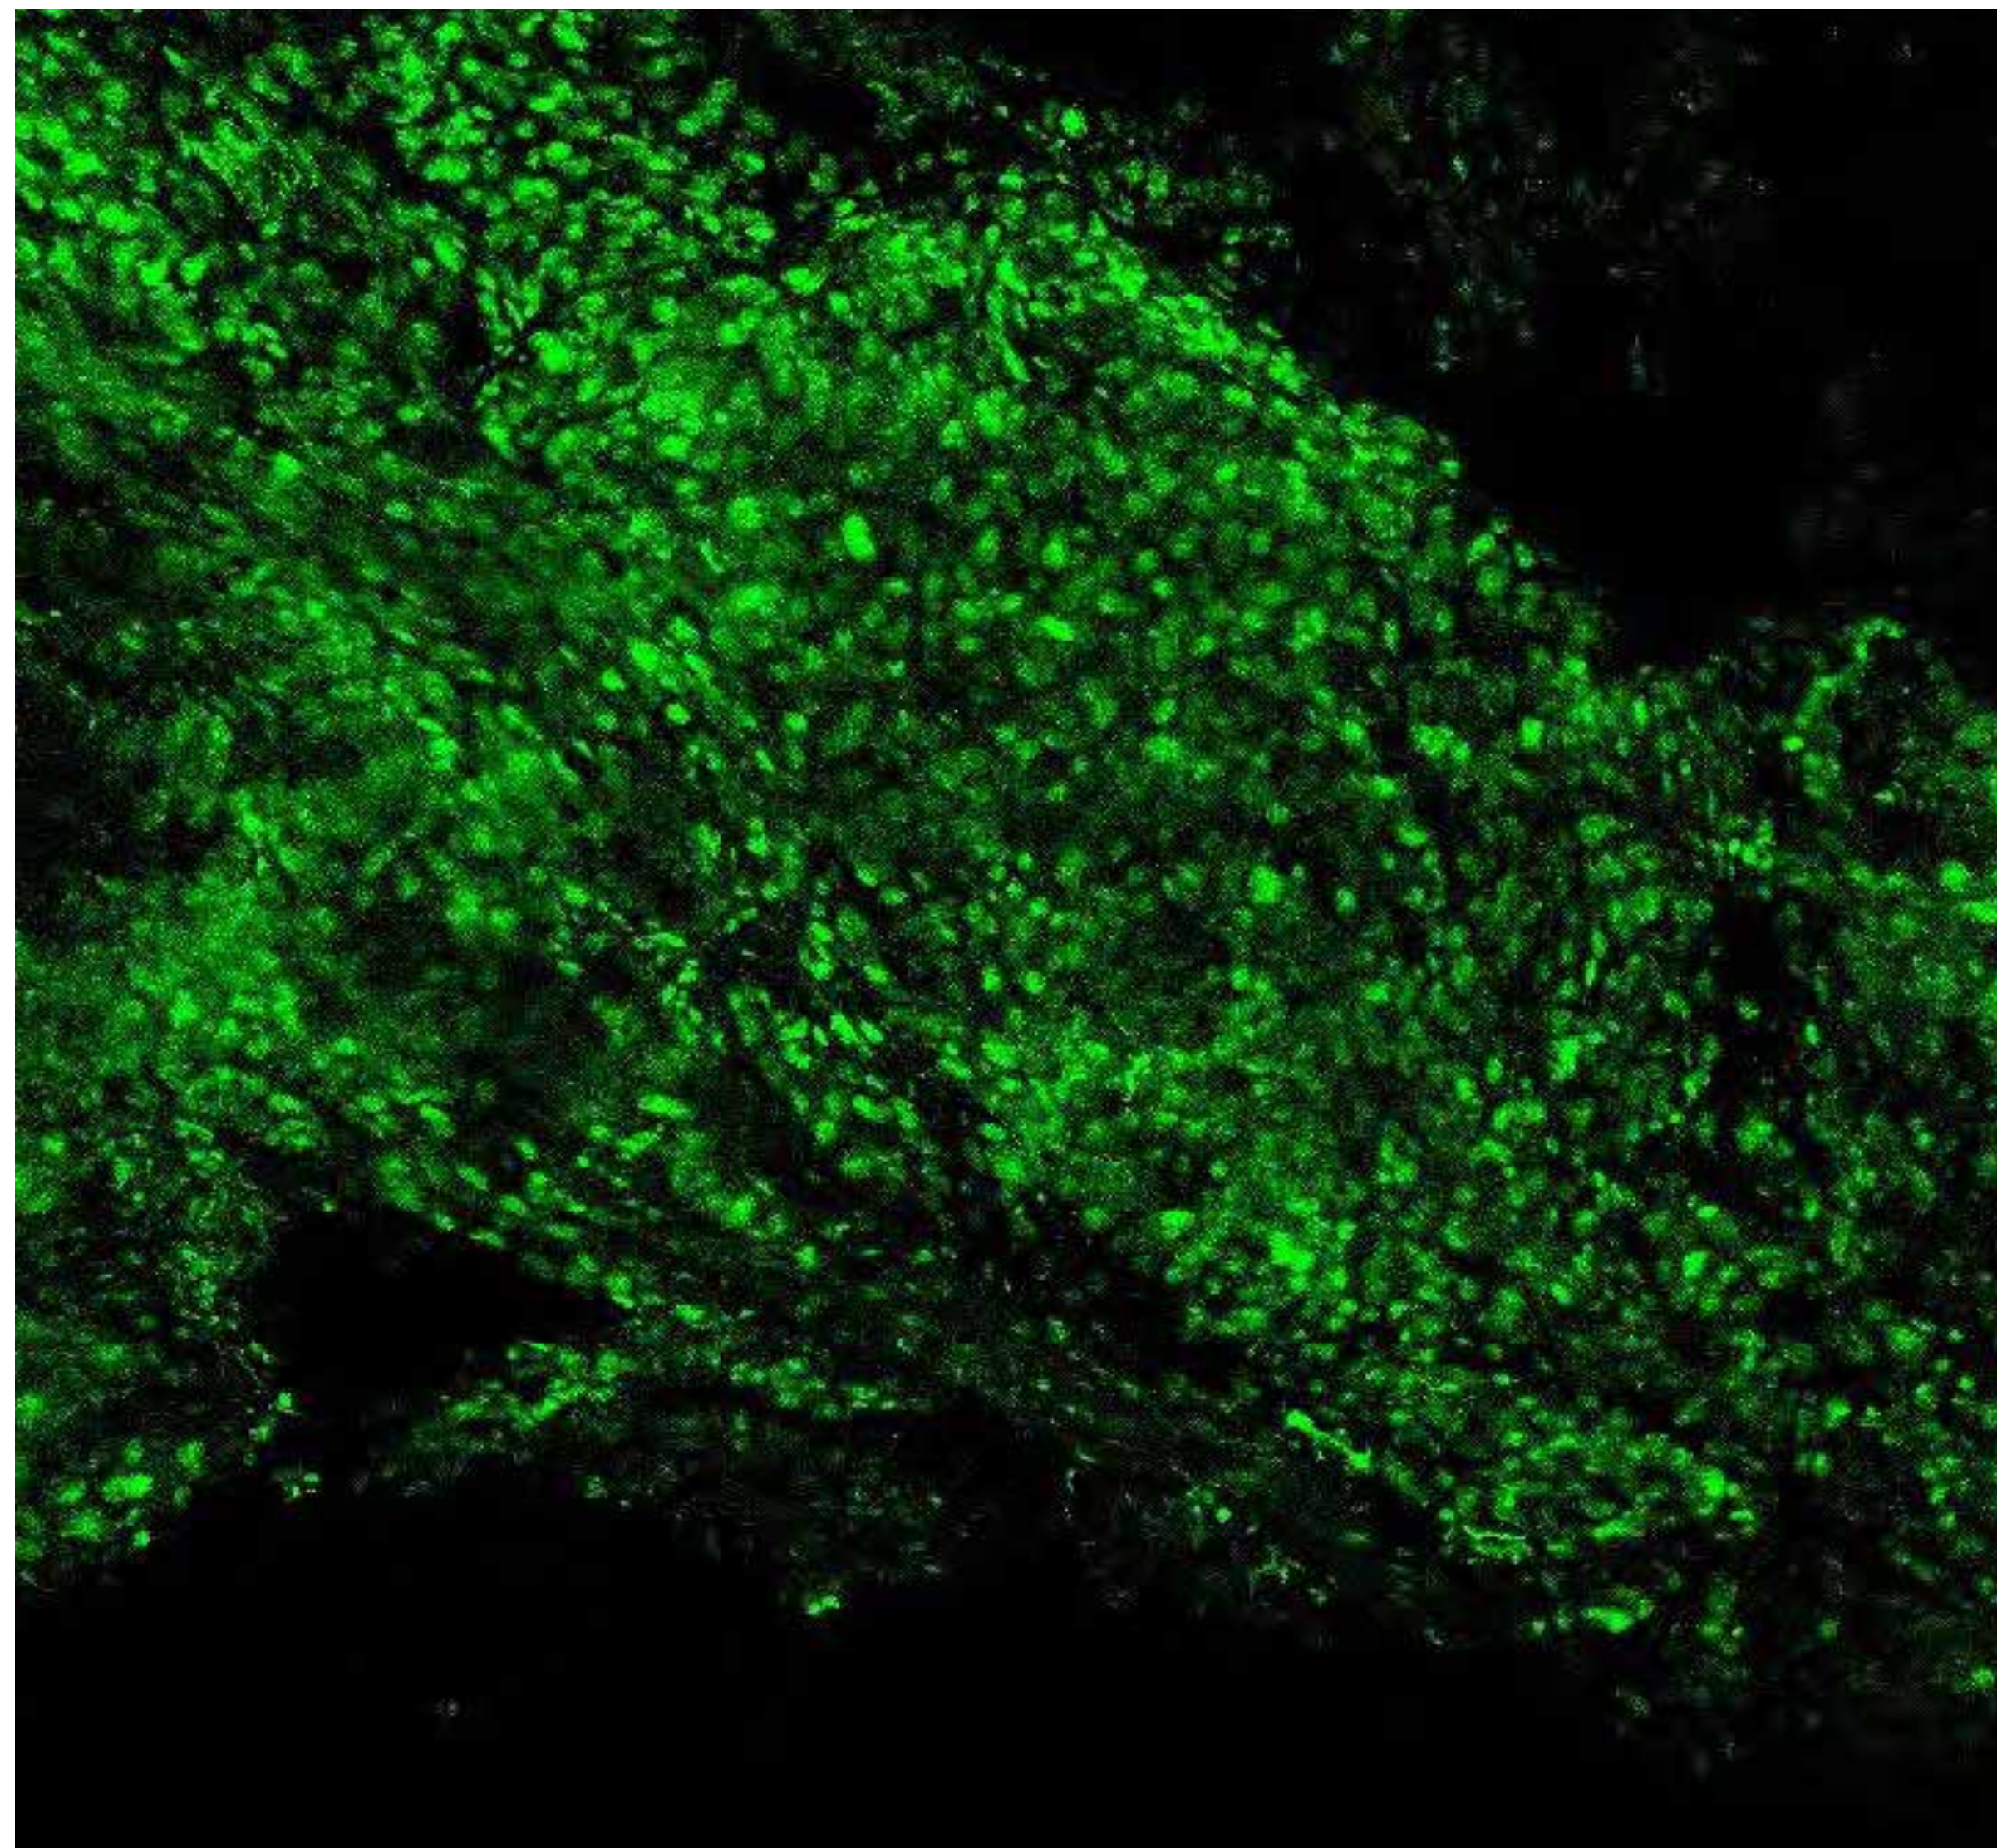

PARPi-FL only (green)

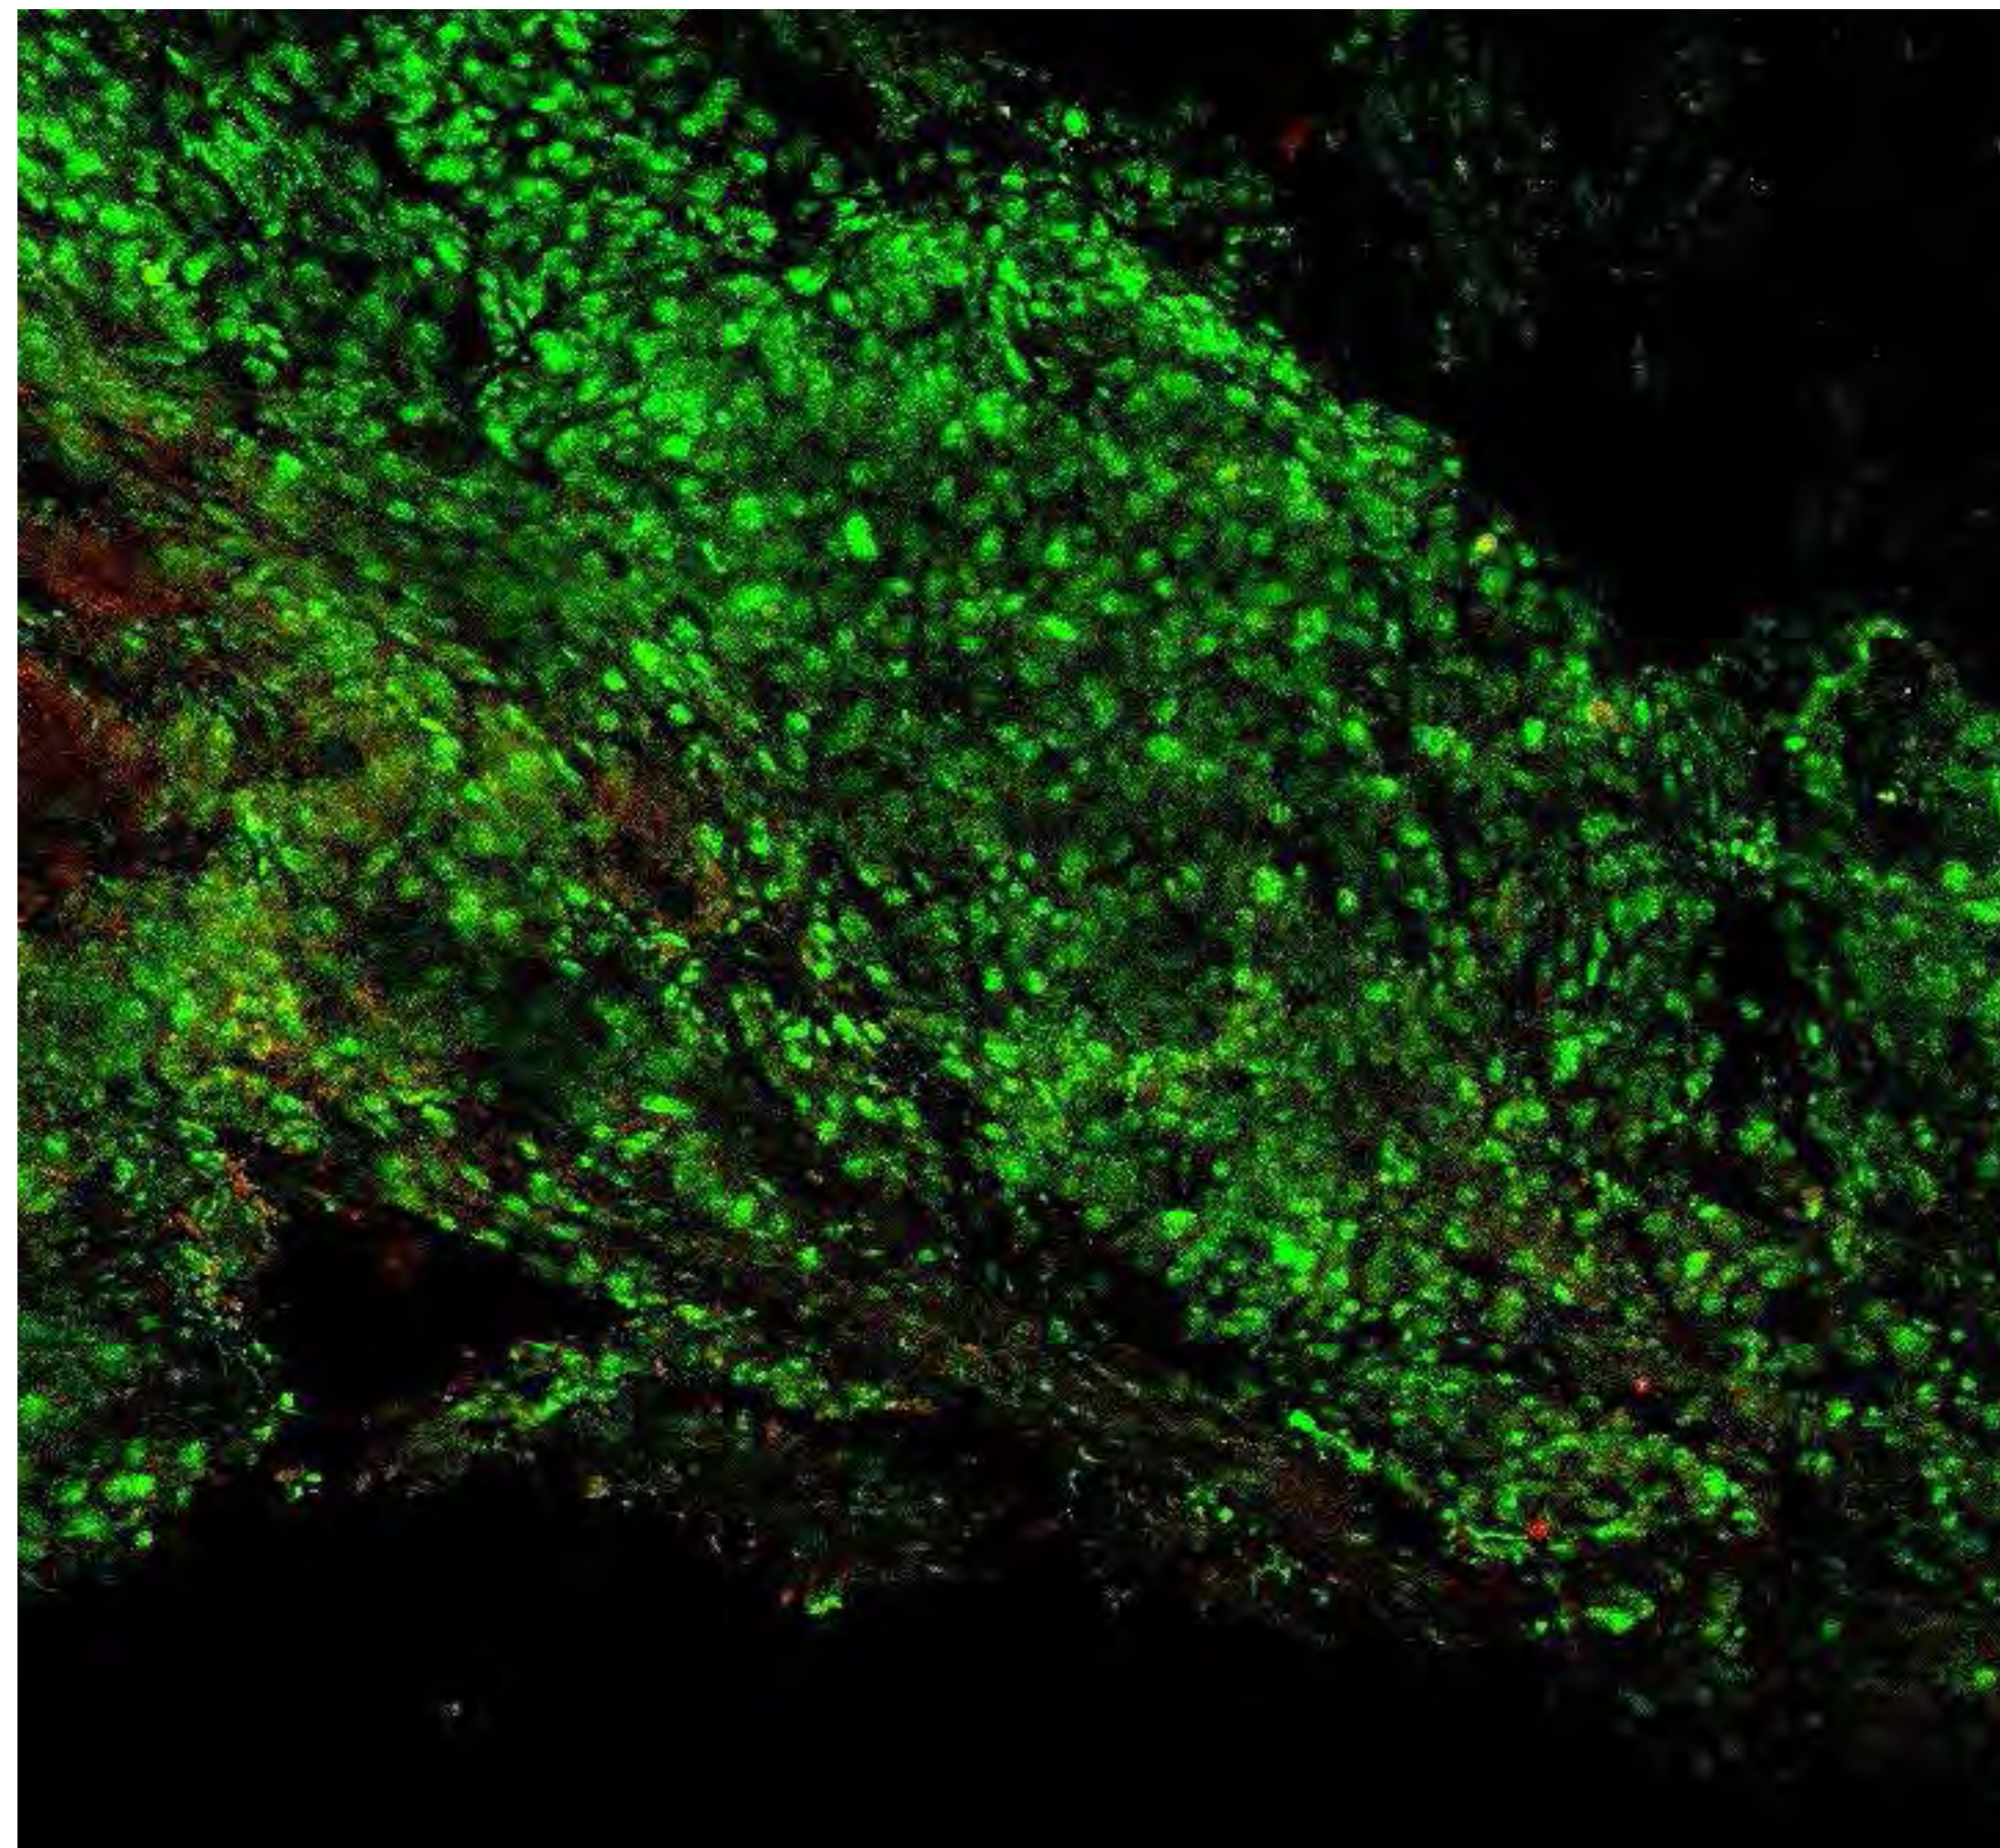

PARPi-FL (green) + Autofluorescence (red/yellow)



6076

10

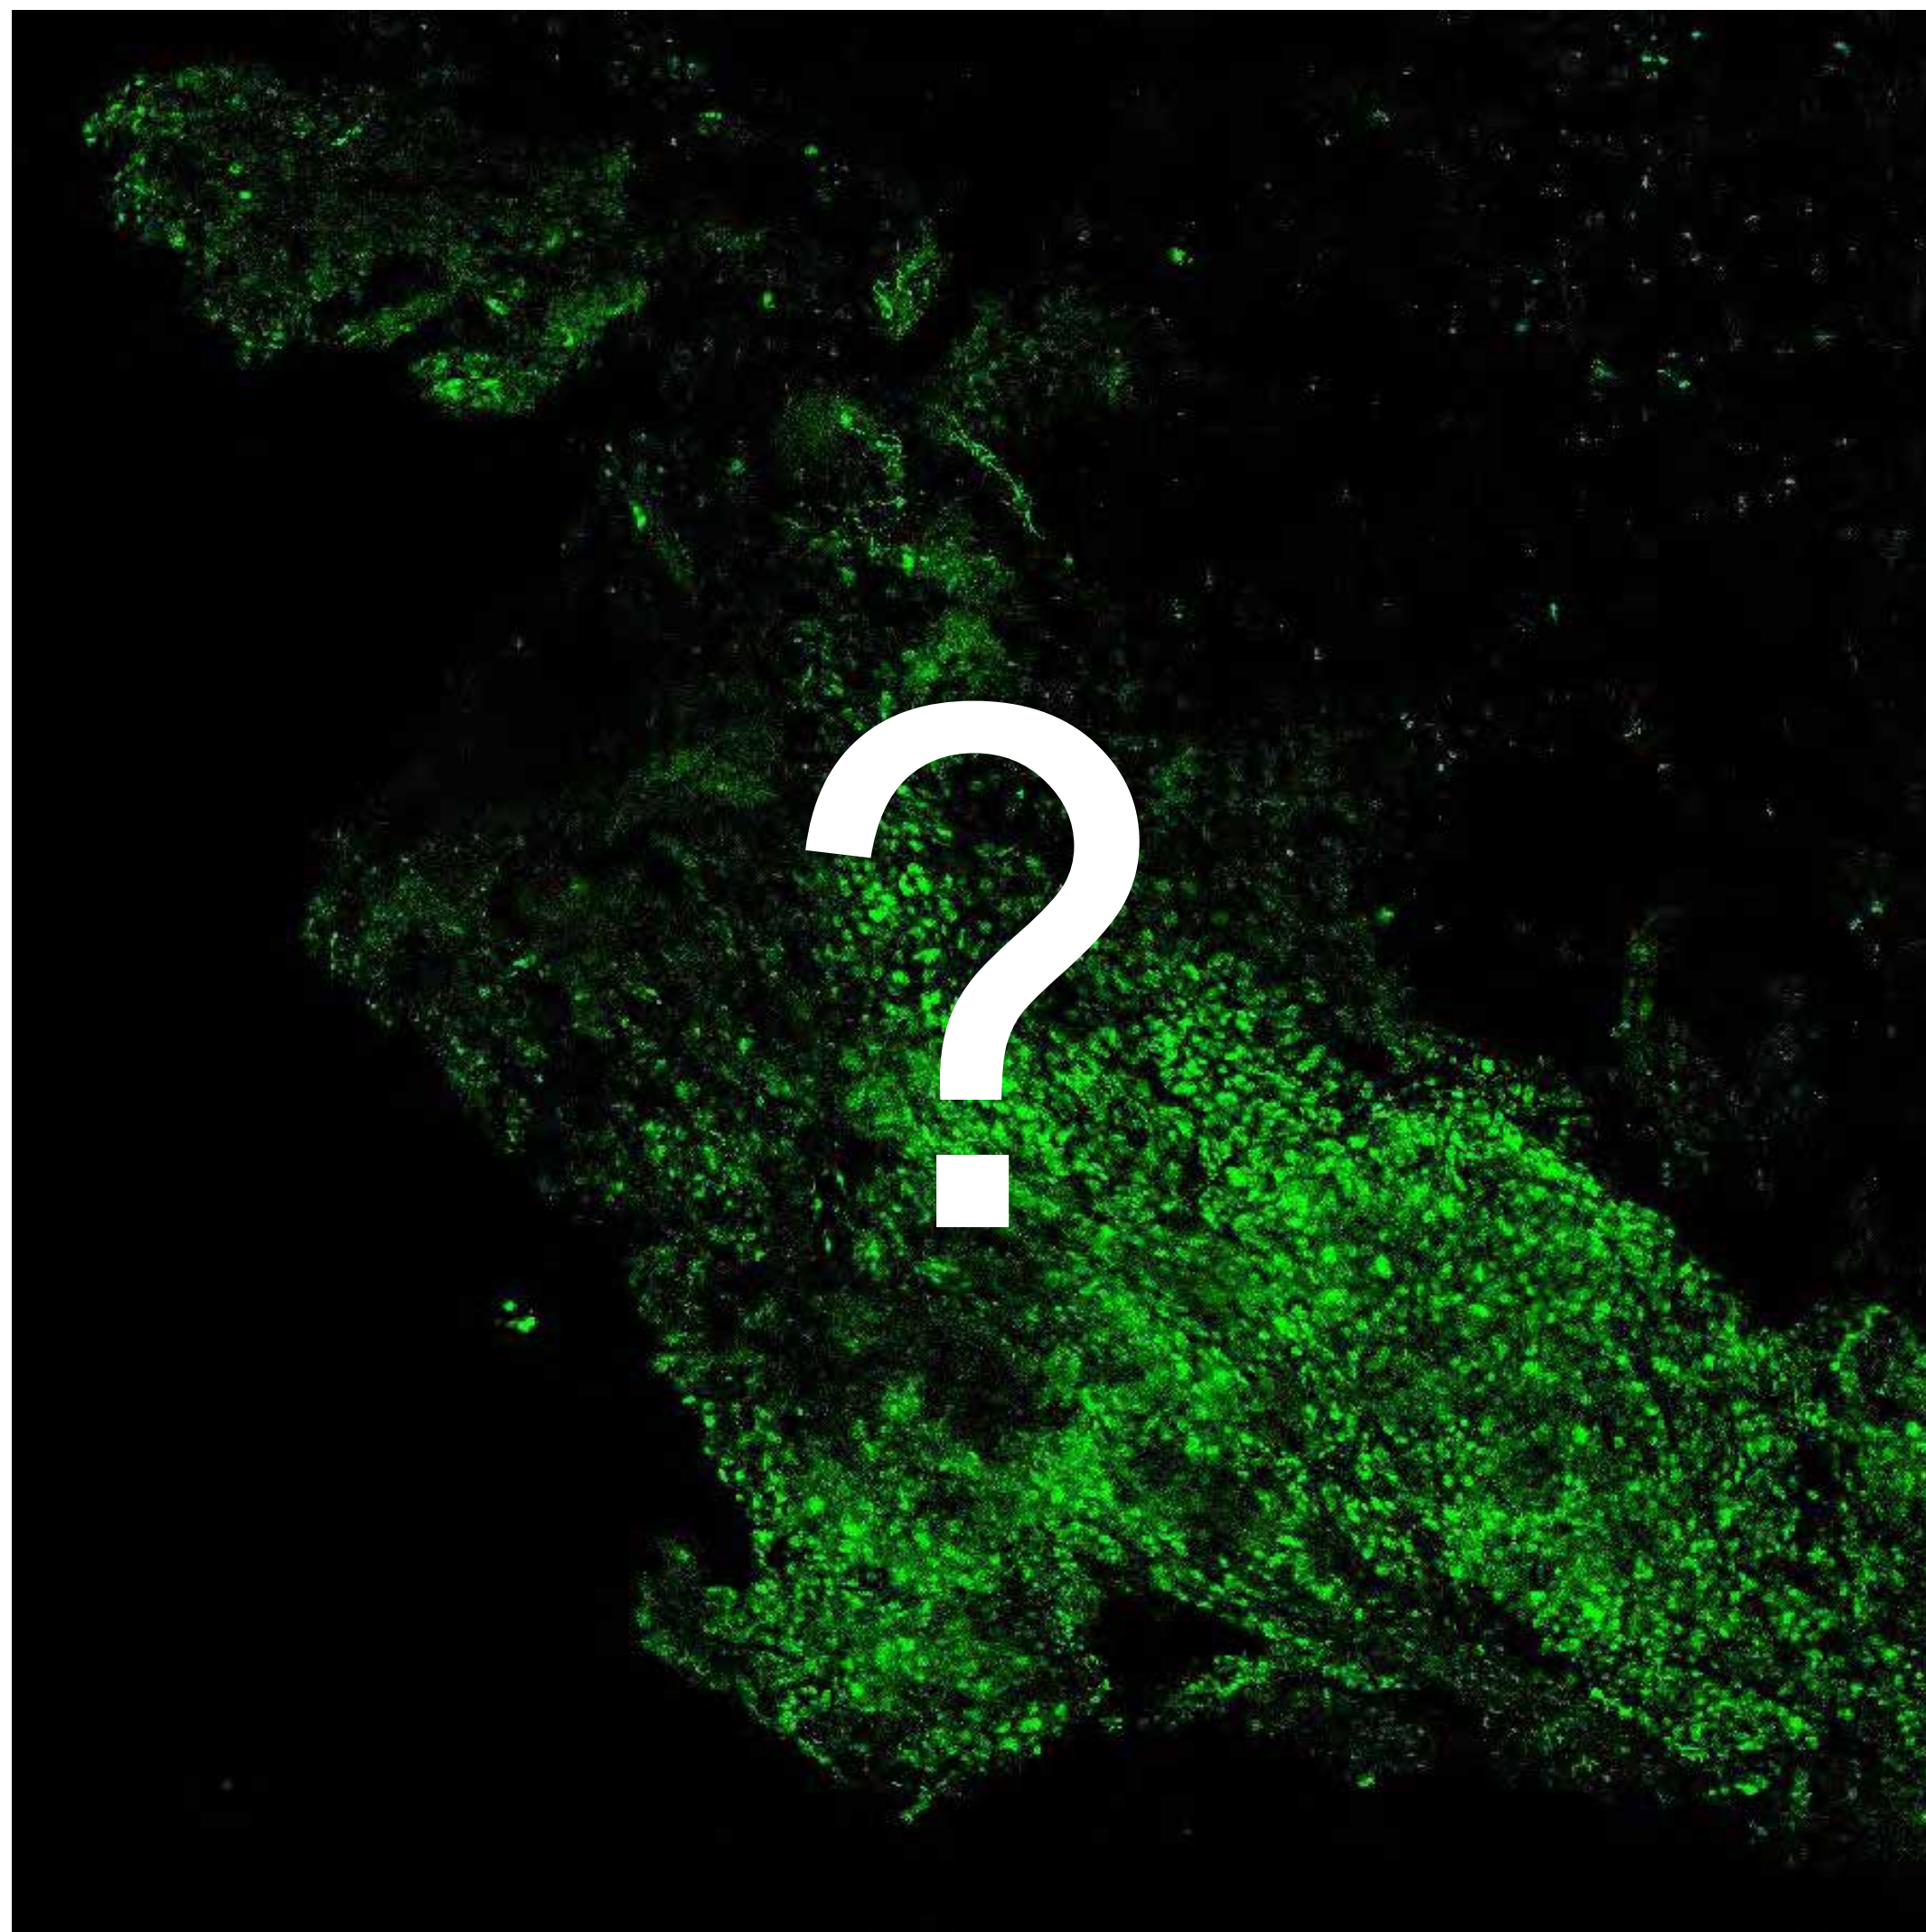

Tumor

Margin



6344

# Overview

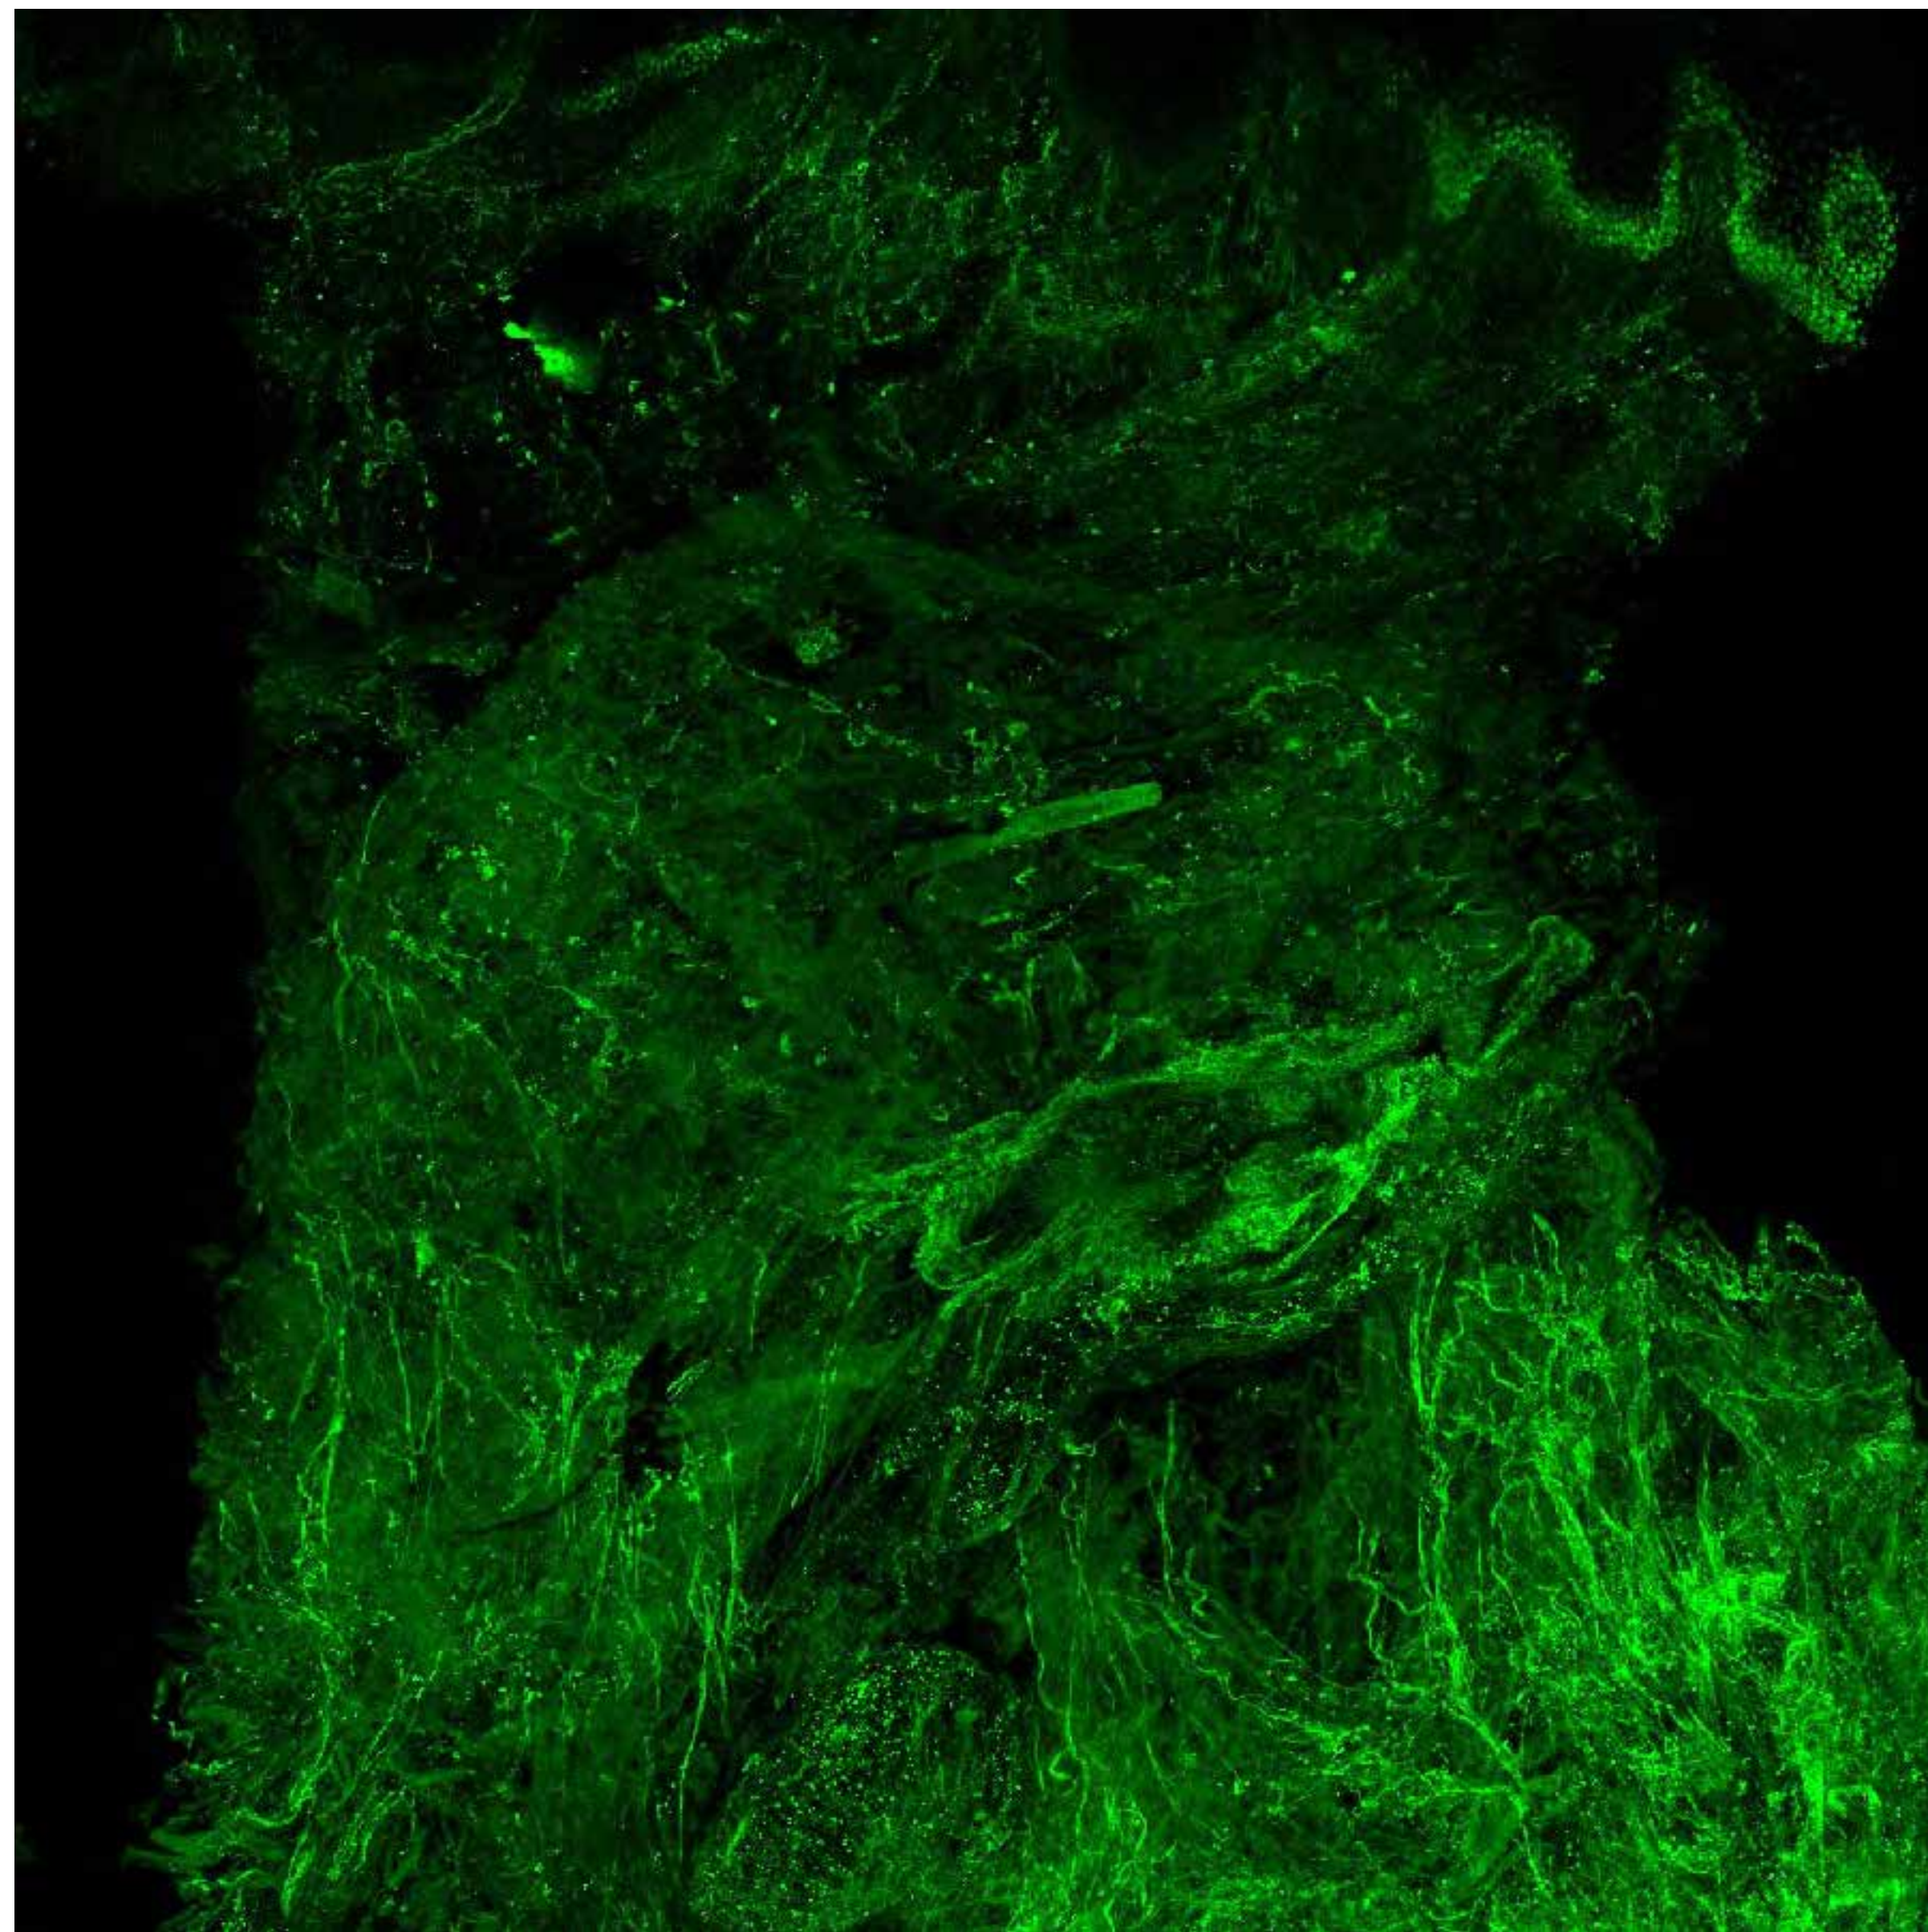

PARPi-FL only (green)

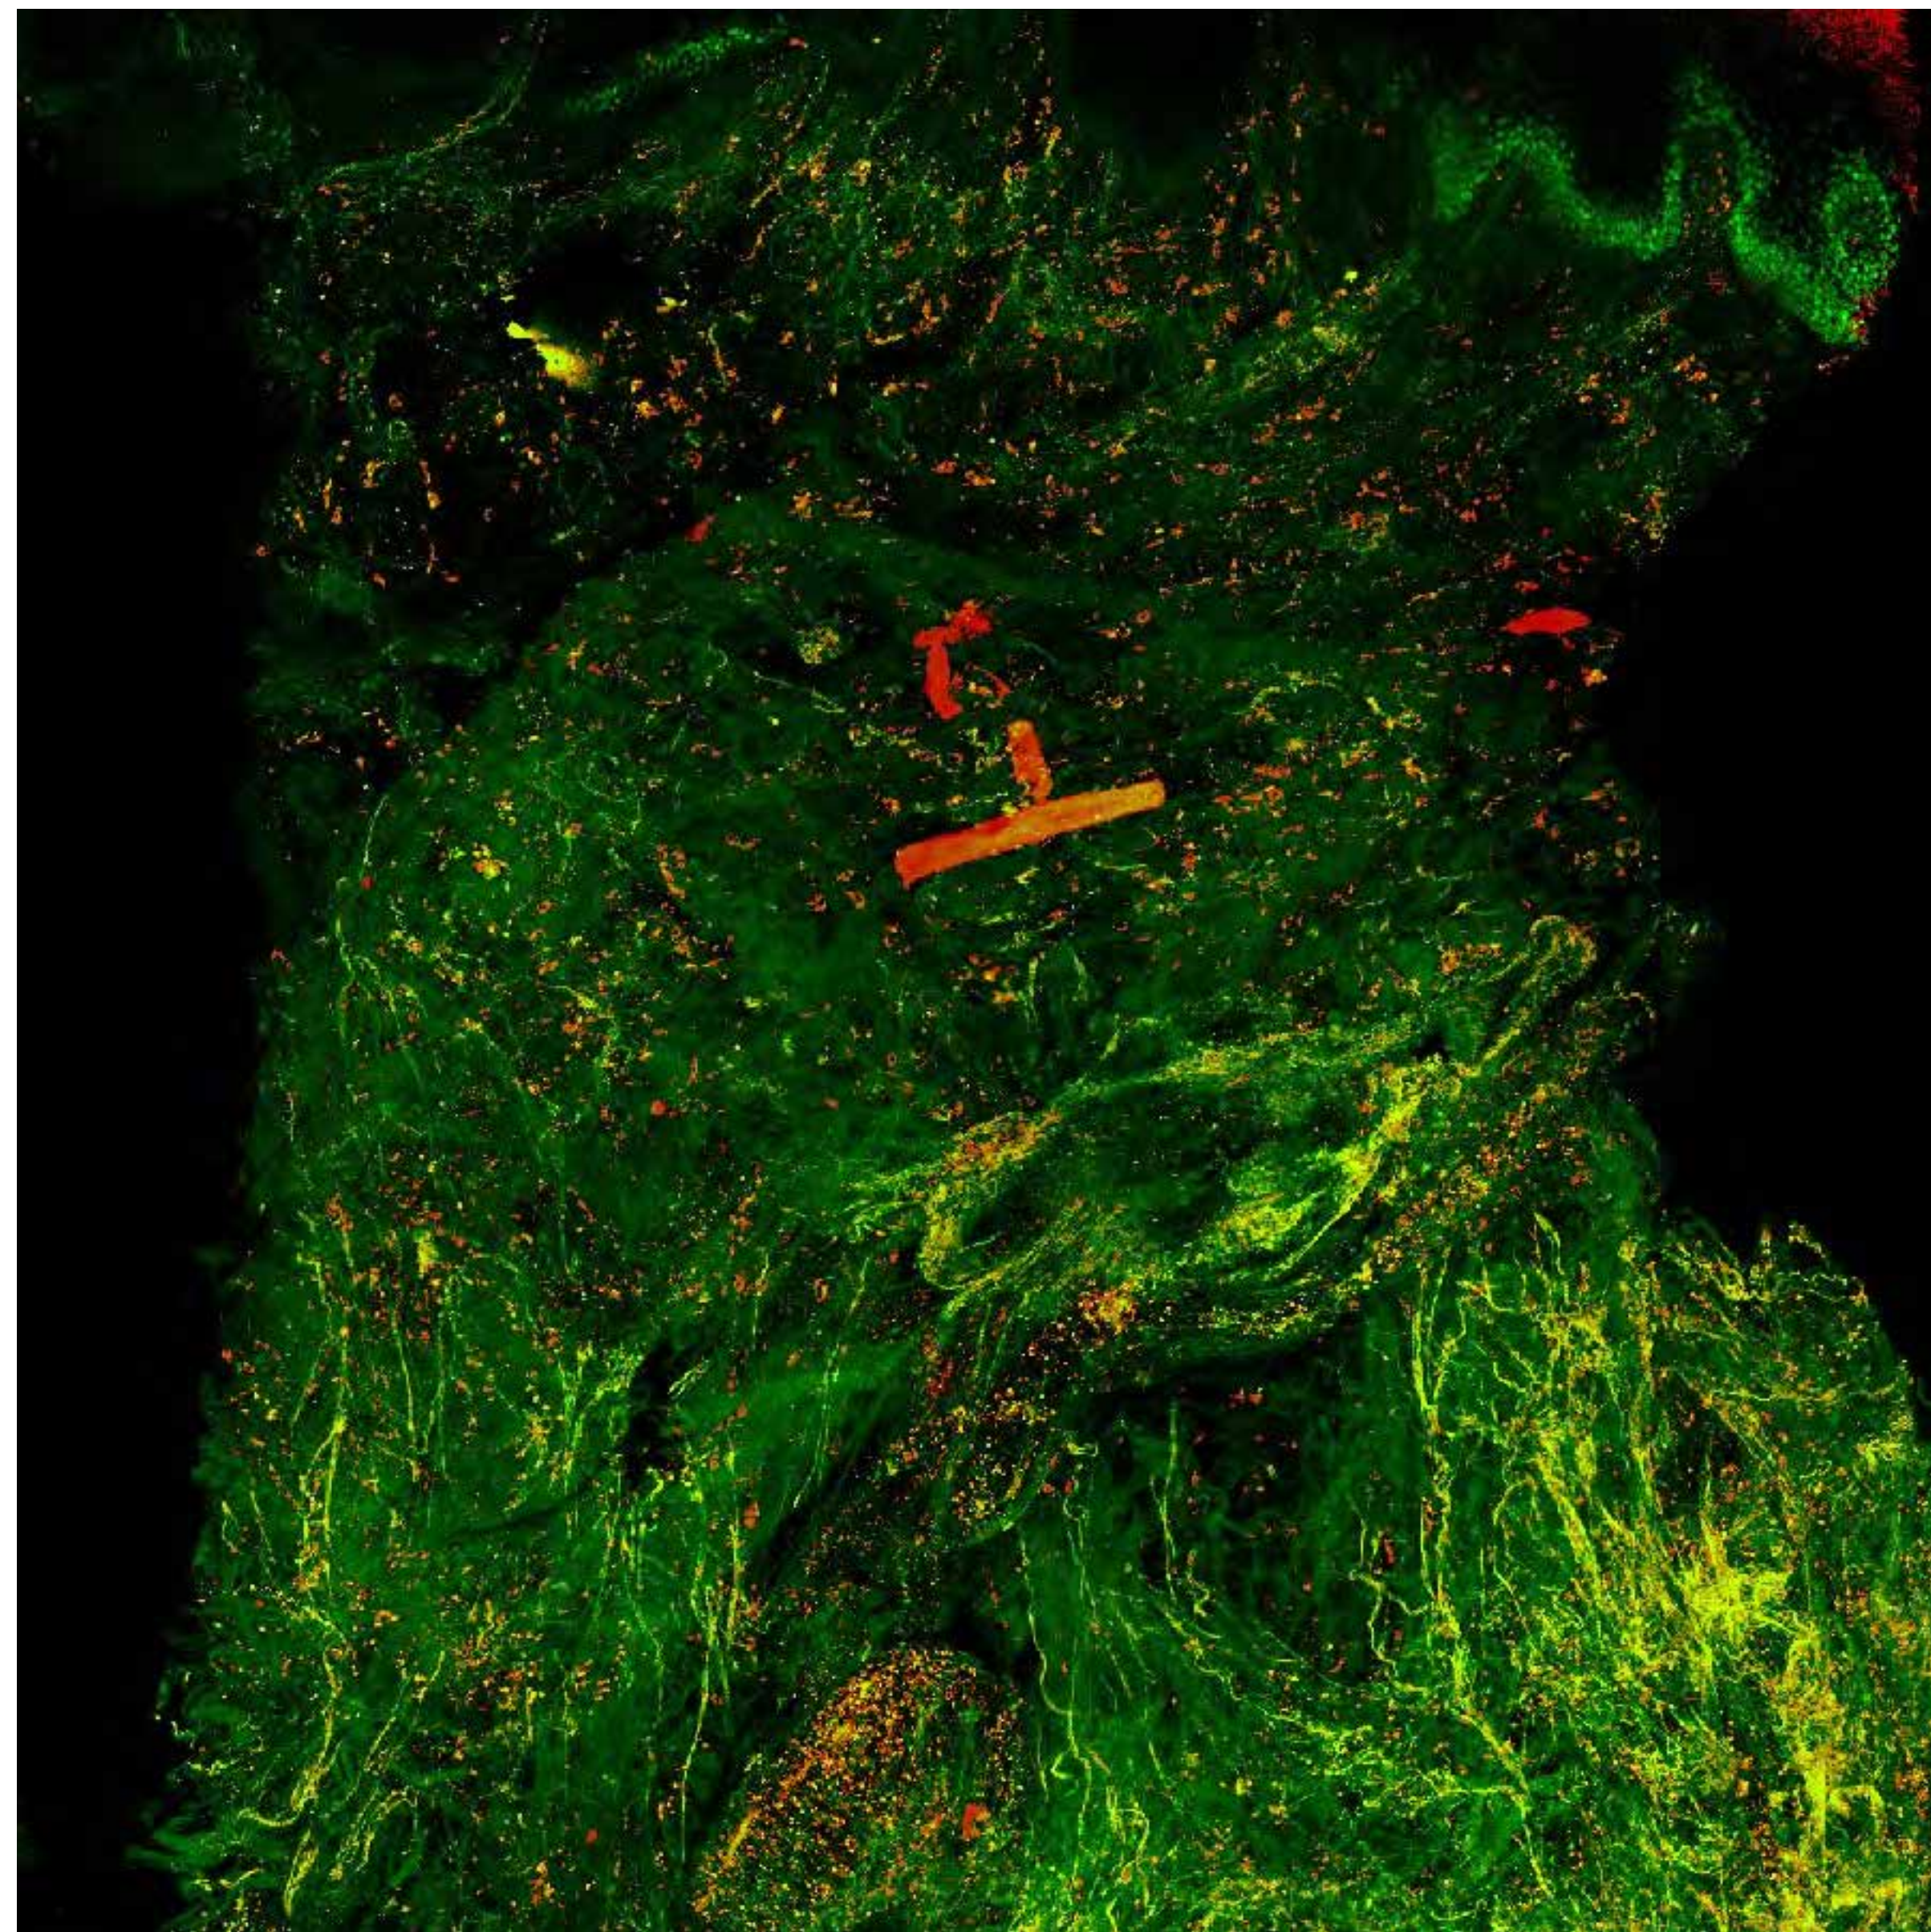

PARPi-FL (green) + Autofluorescence (red/yellow)



6344

Close-up

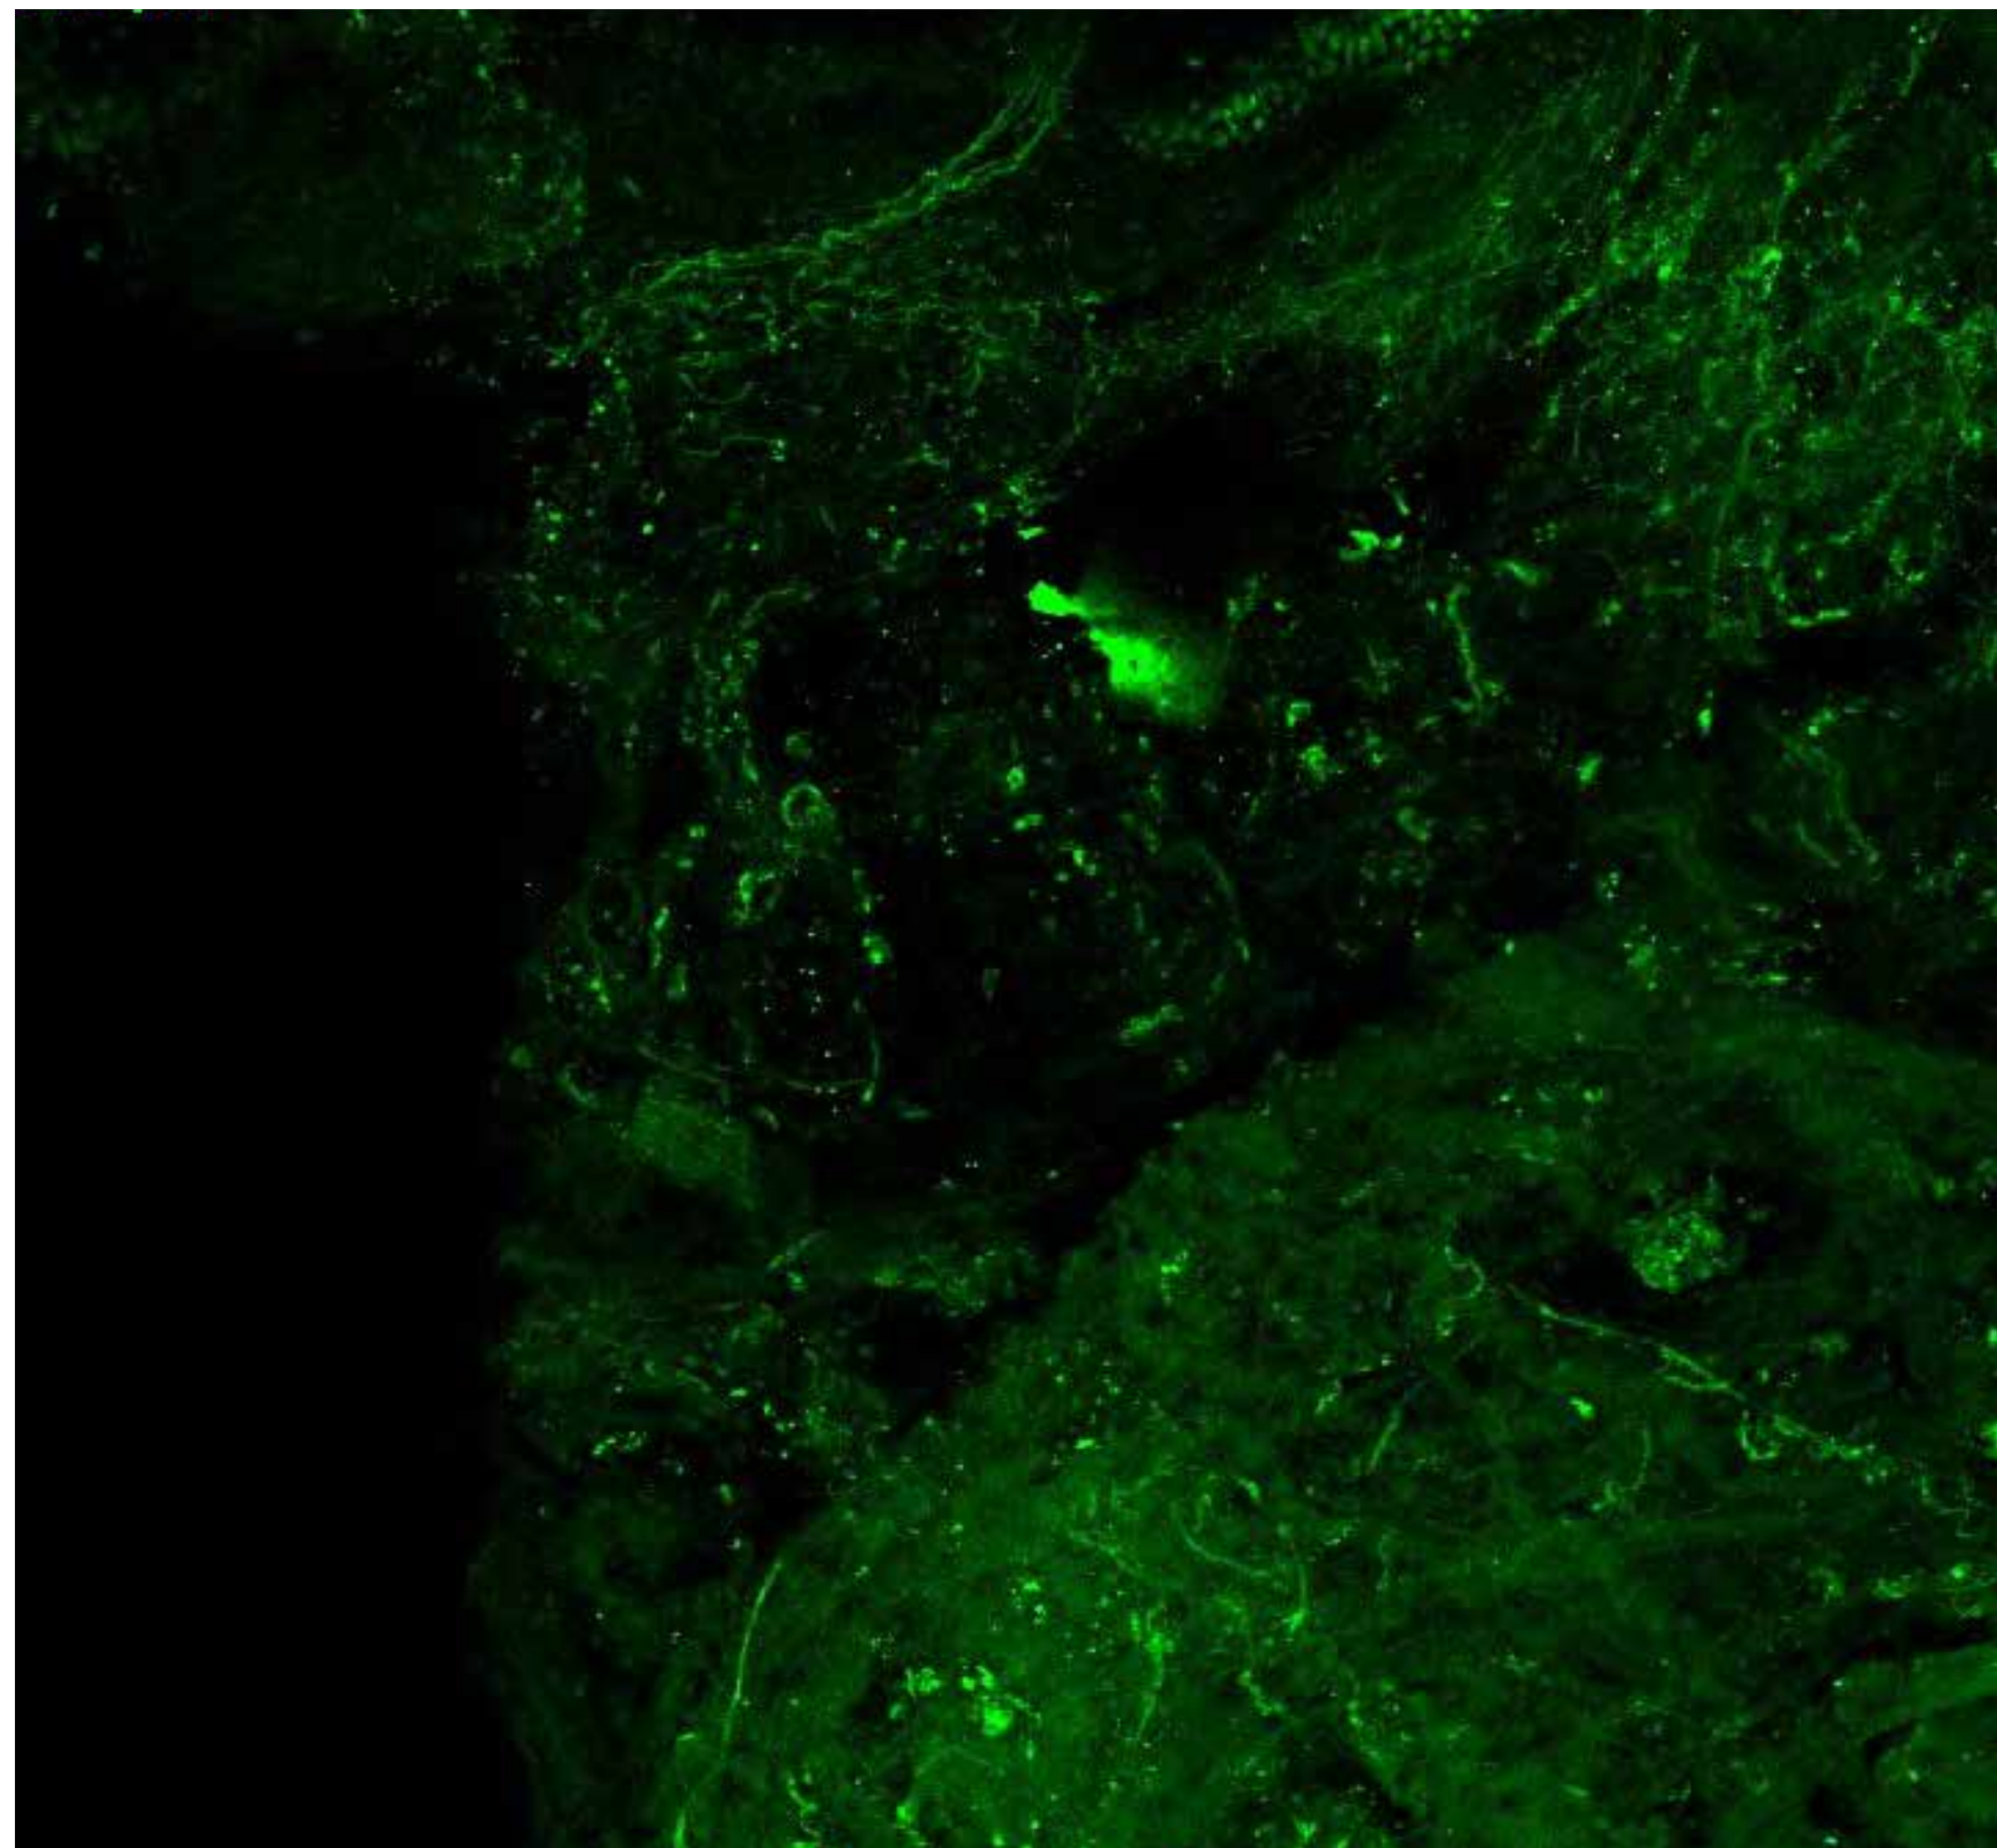

PARPi-FL only (green)

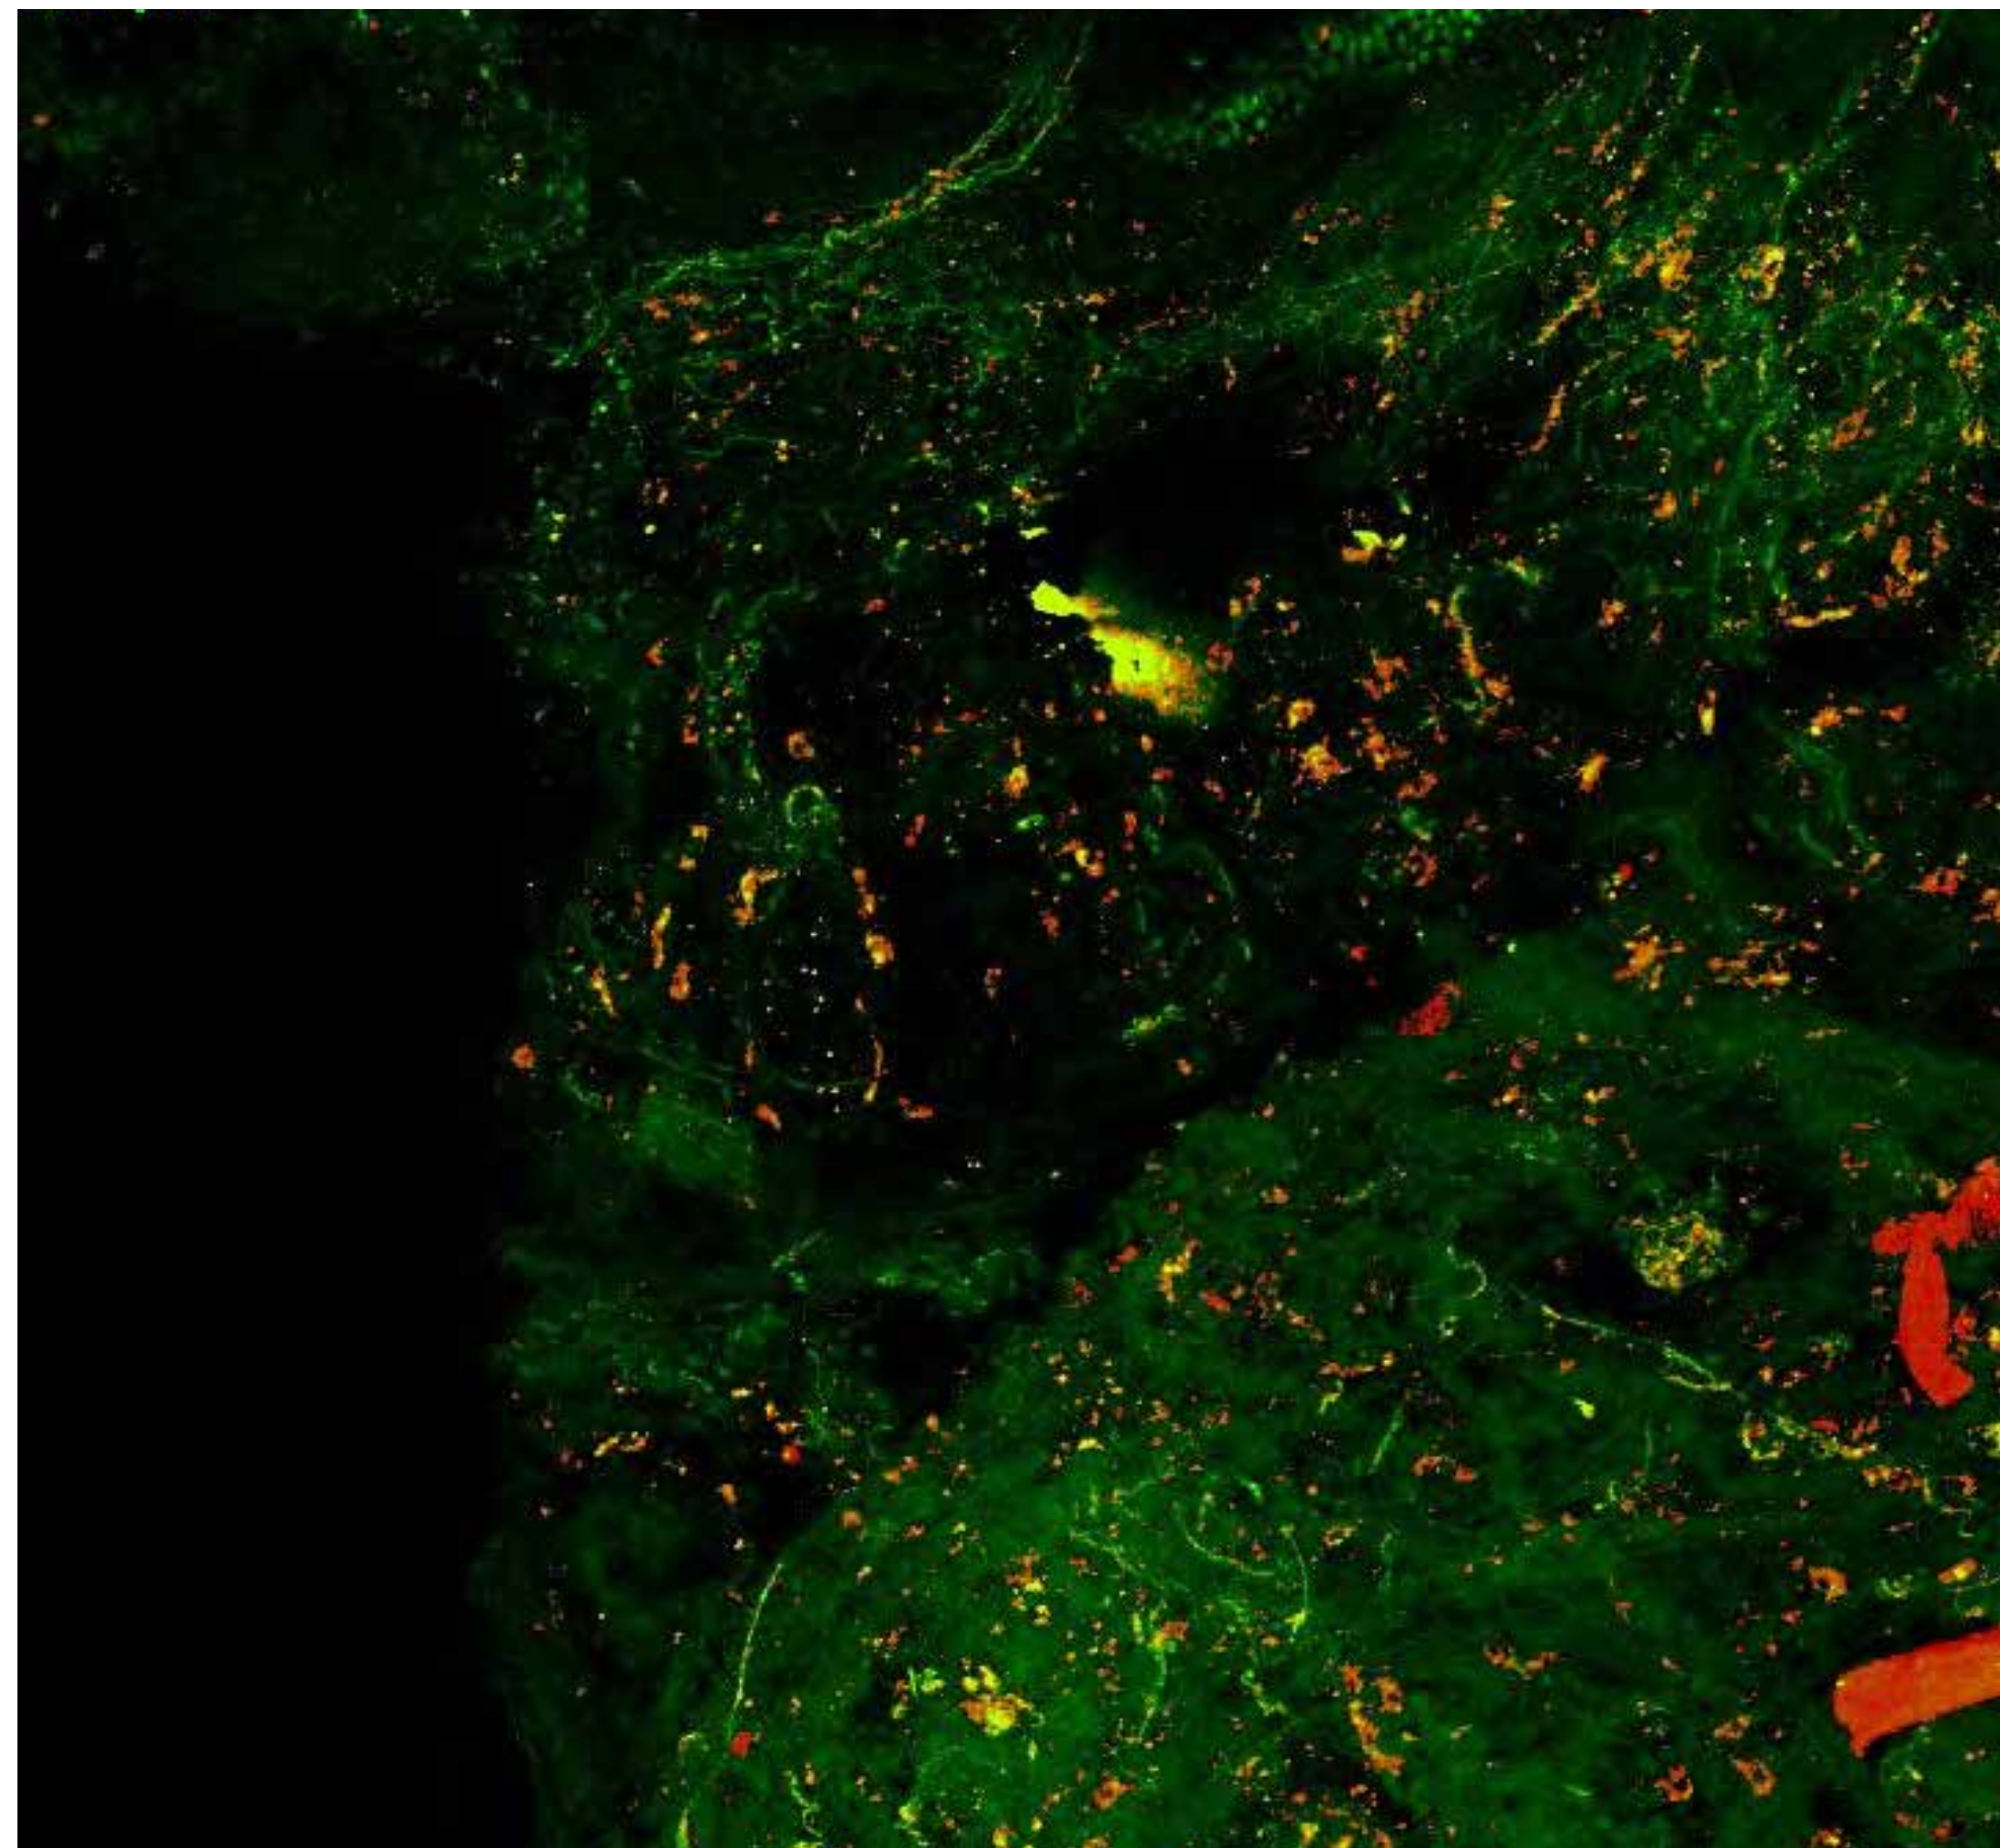

PARPi-FL (green) + Autofluorescence (red/yellow)



6344

Close-up

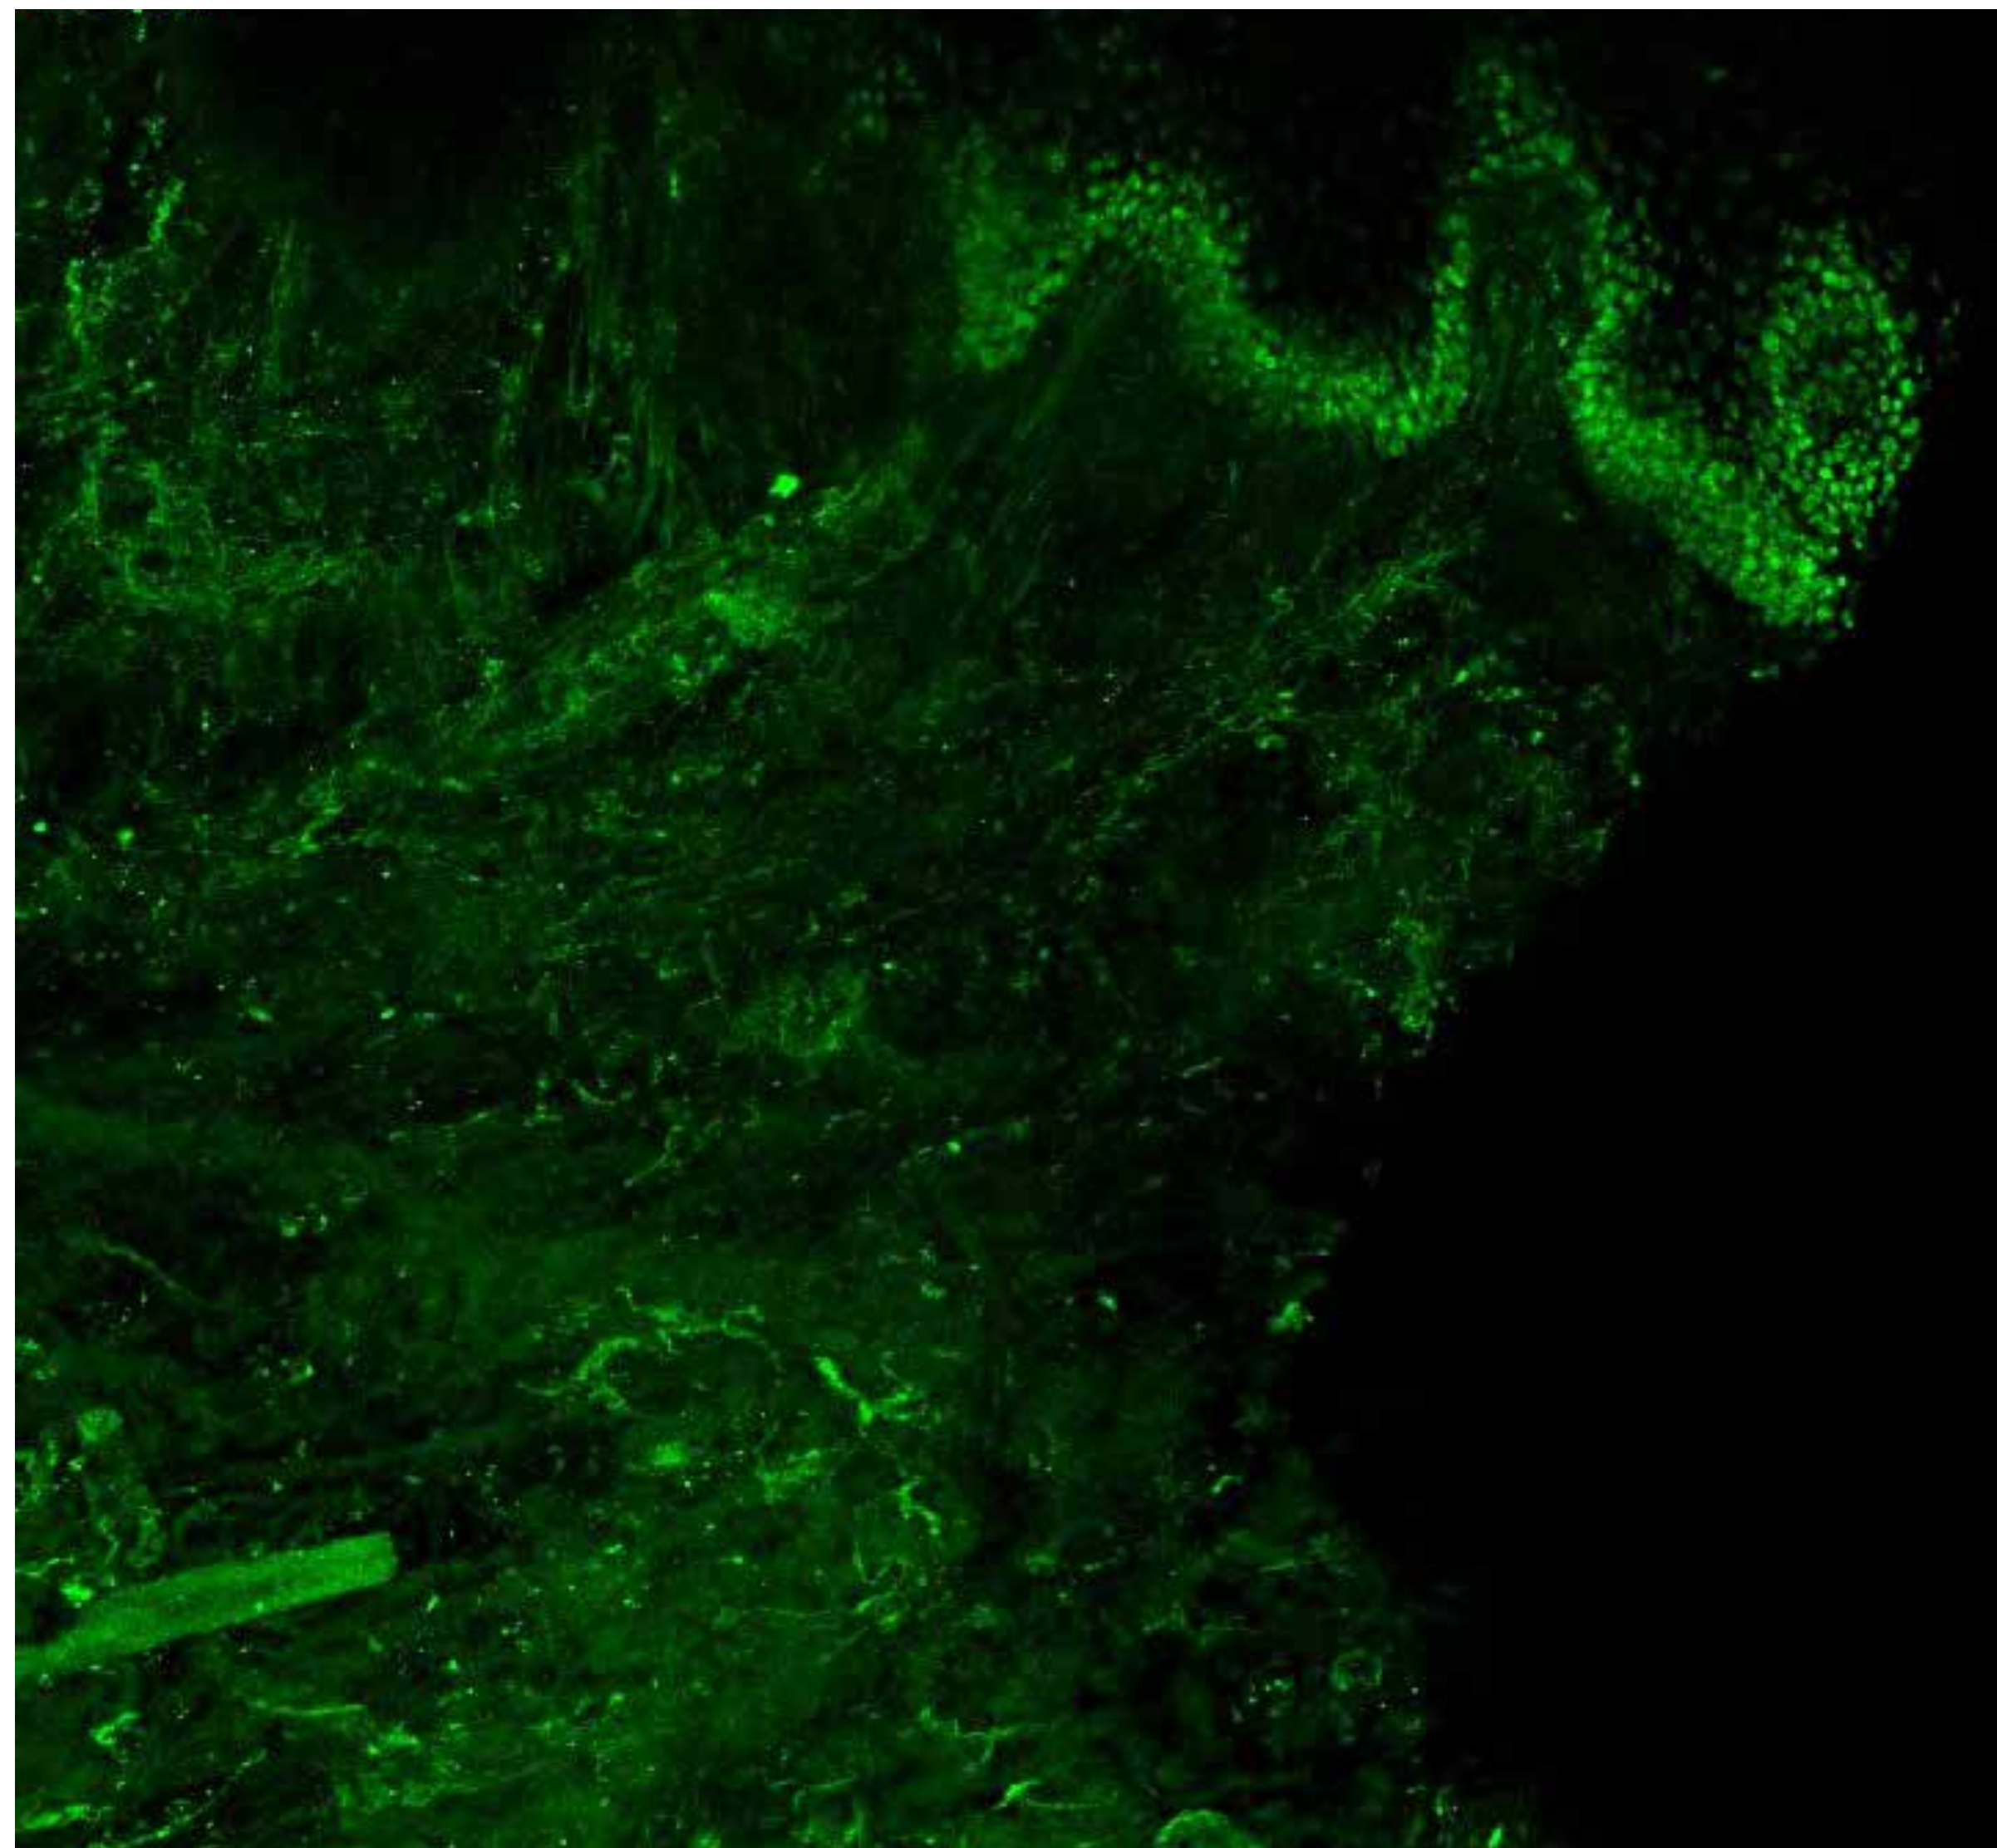

PARPi-FL only (green)

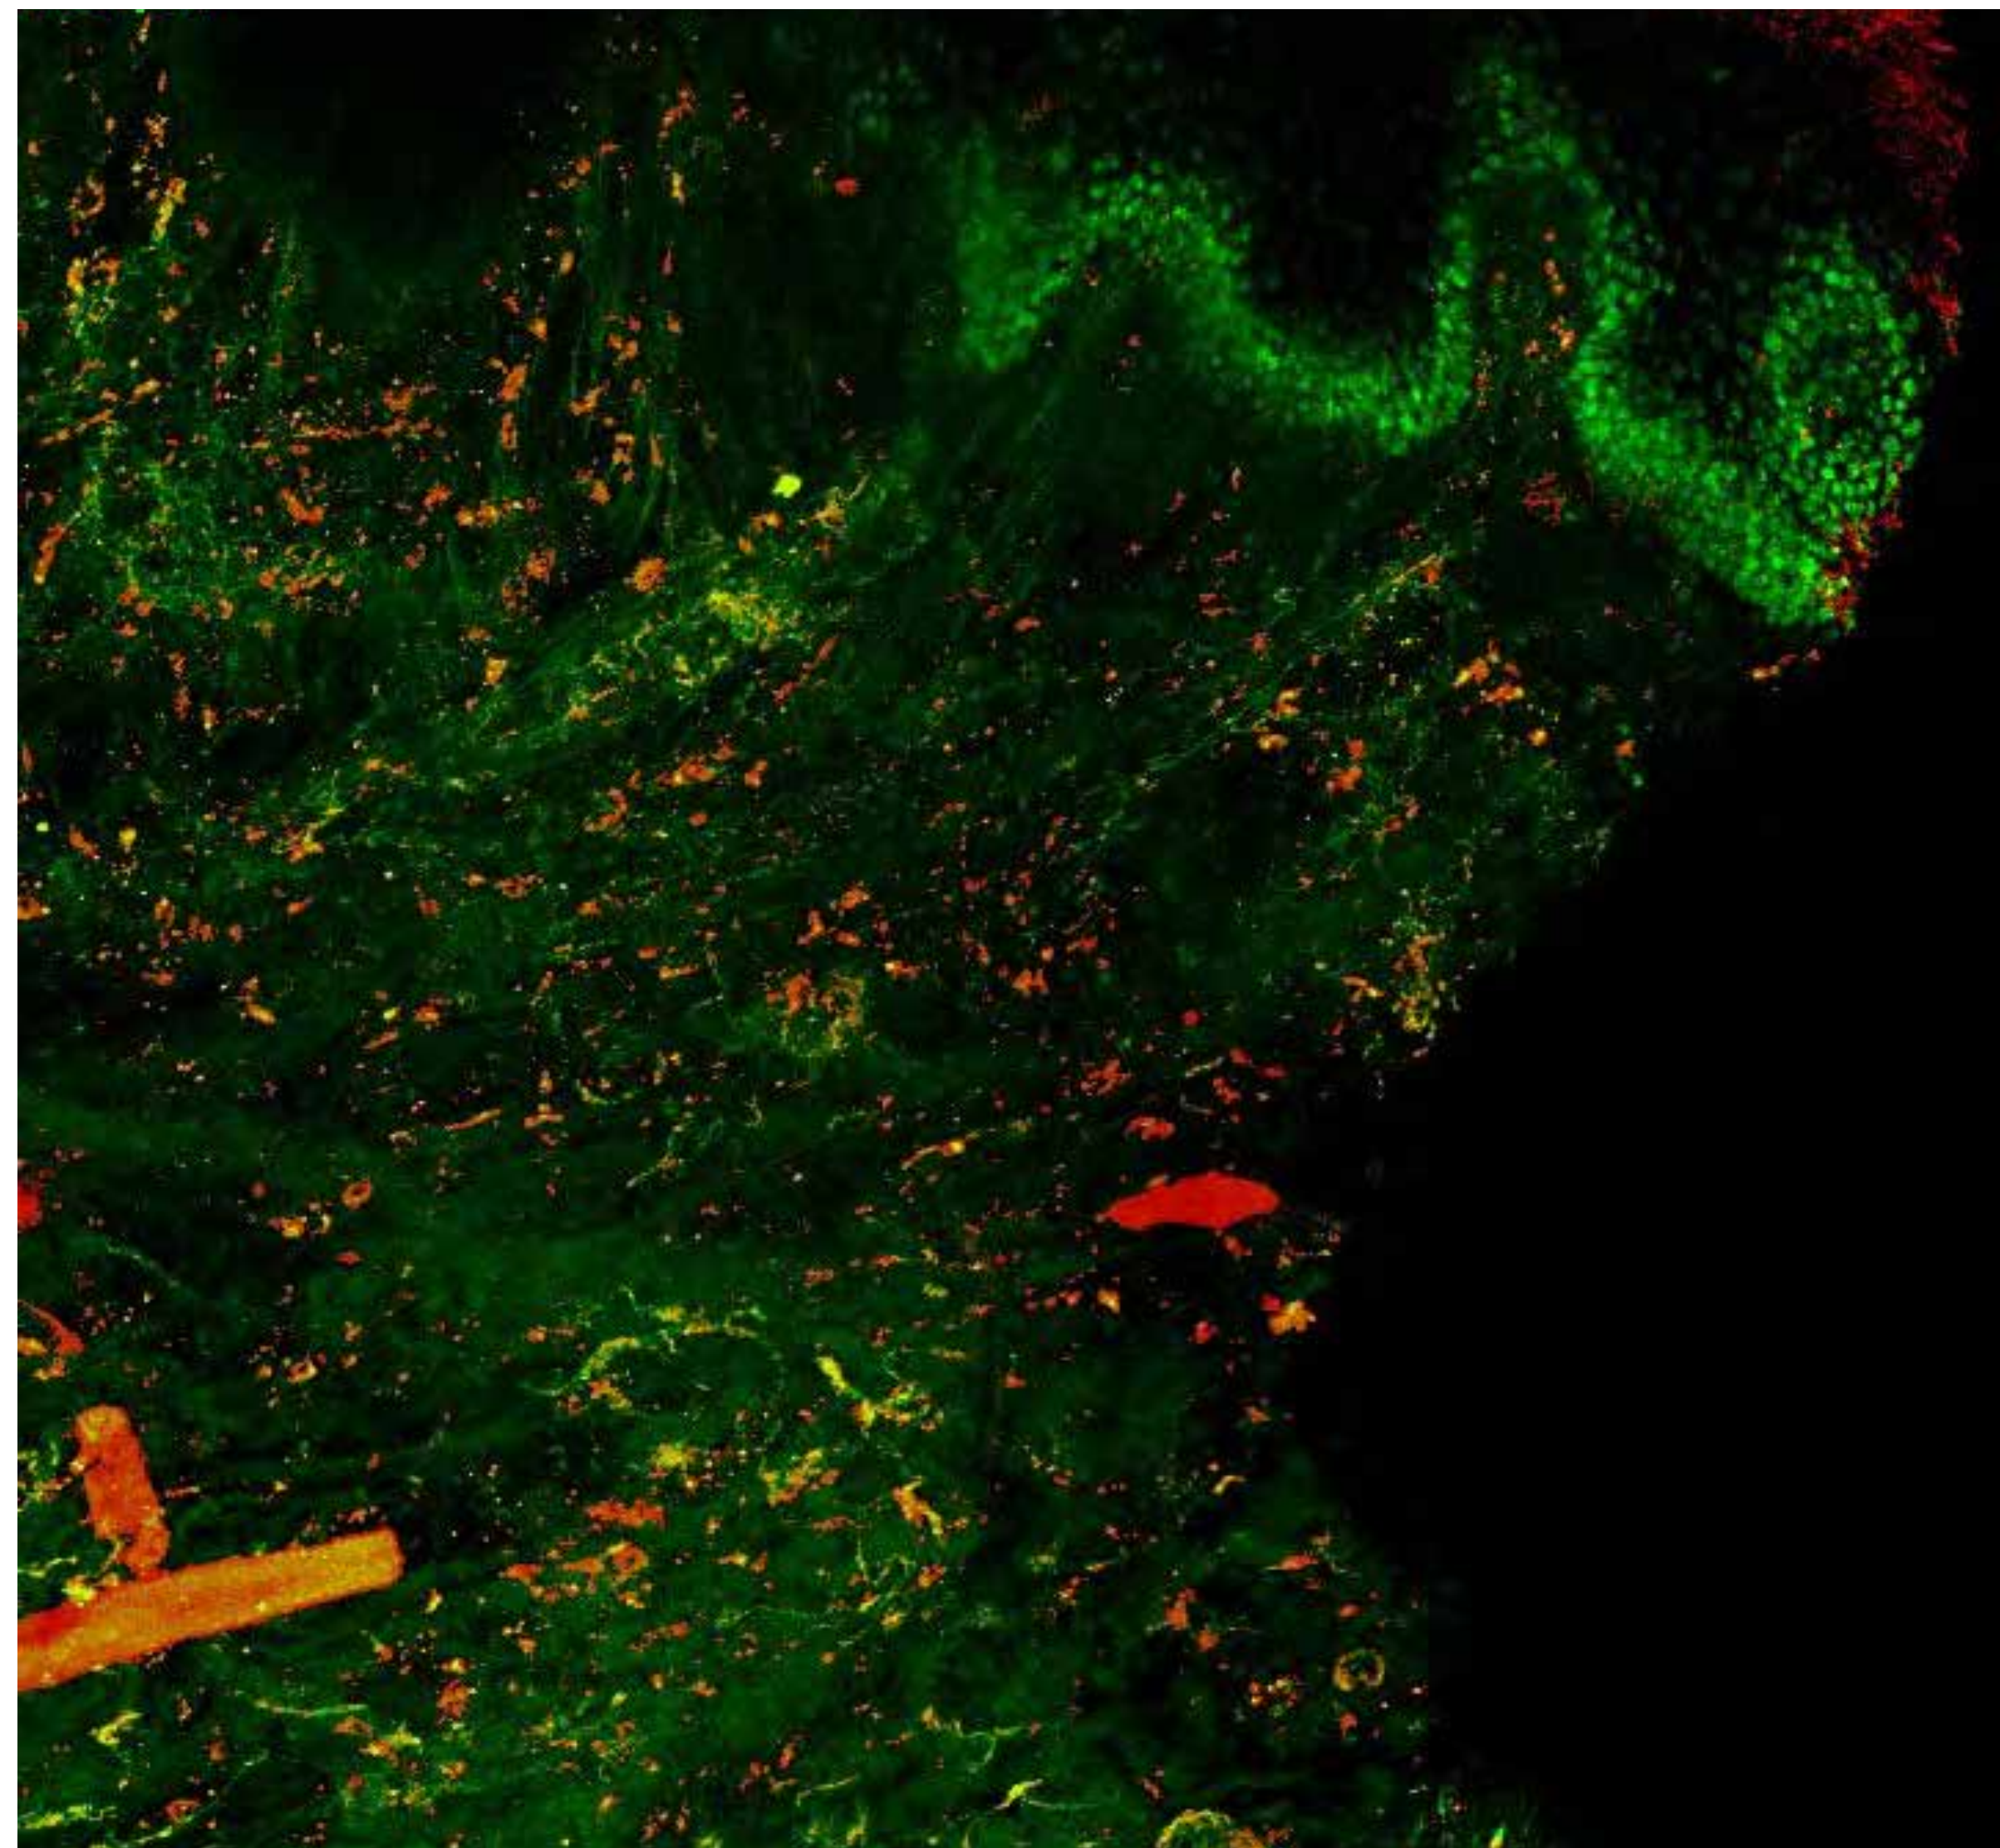

PARPi-FL (green) + Autofluorescence (red/yellow)



6344

Close-up

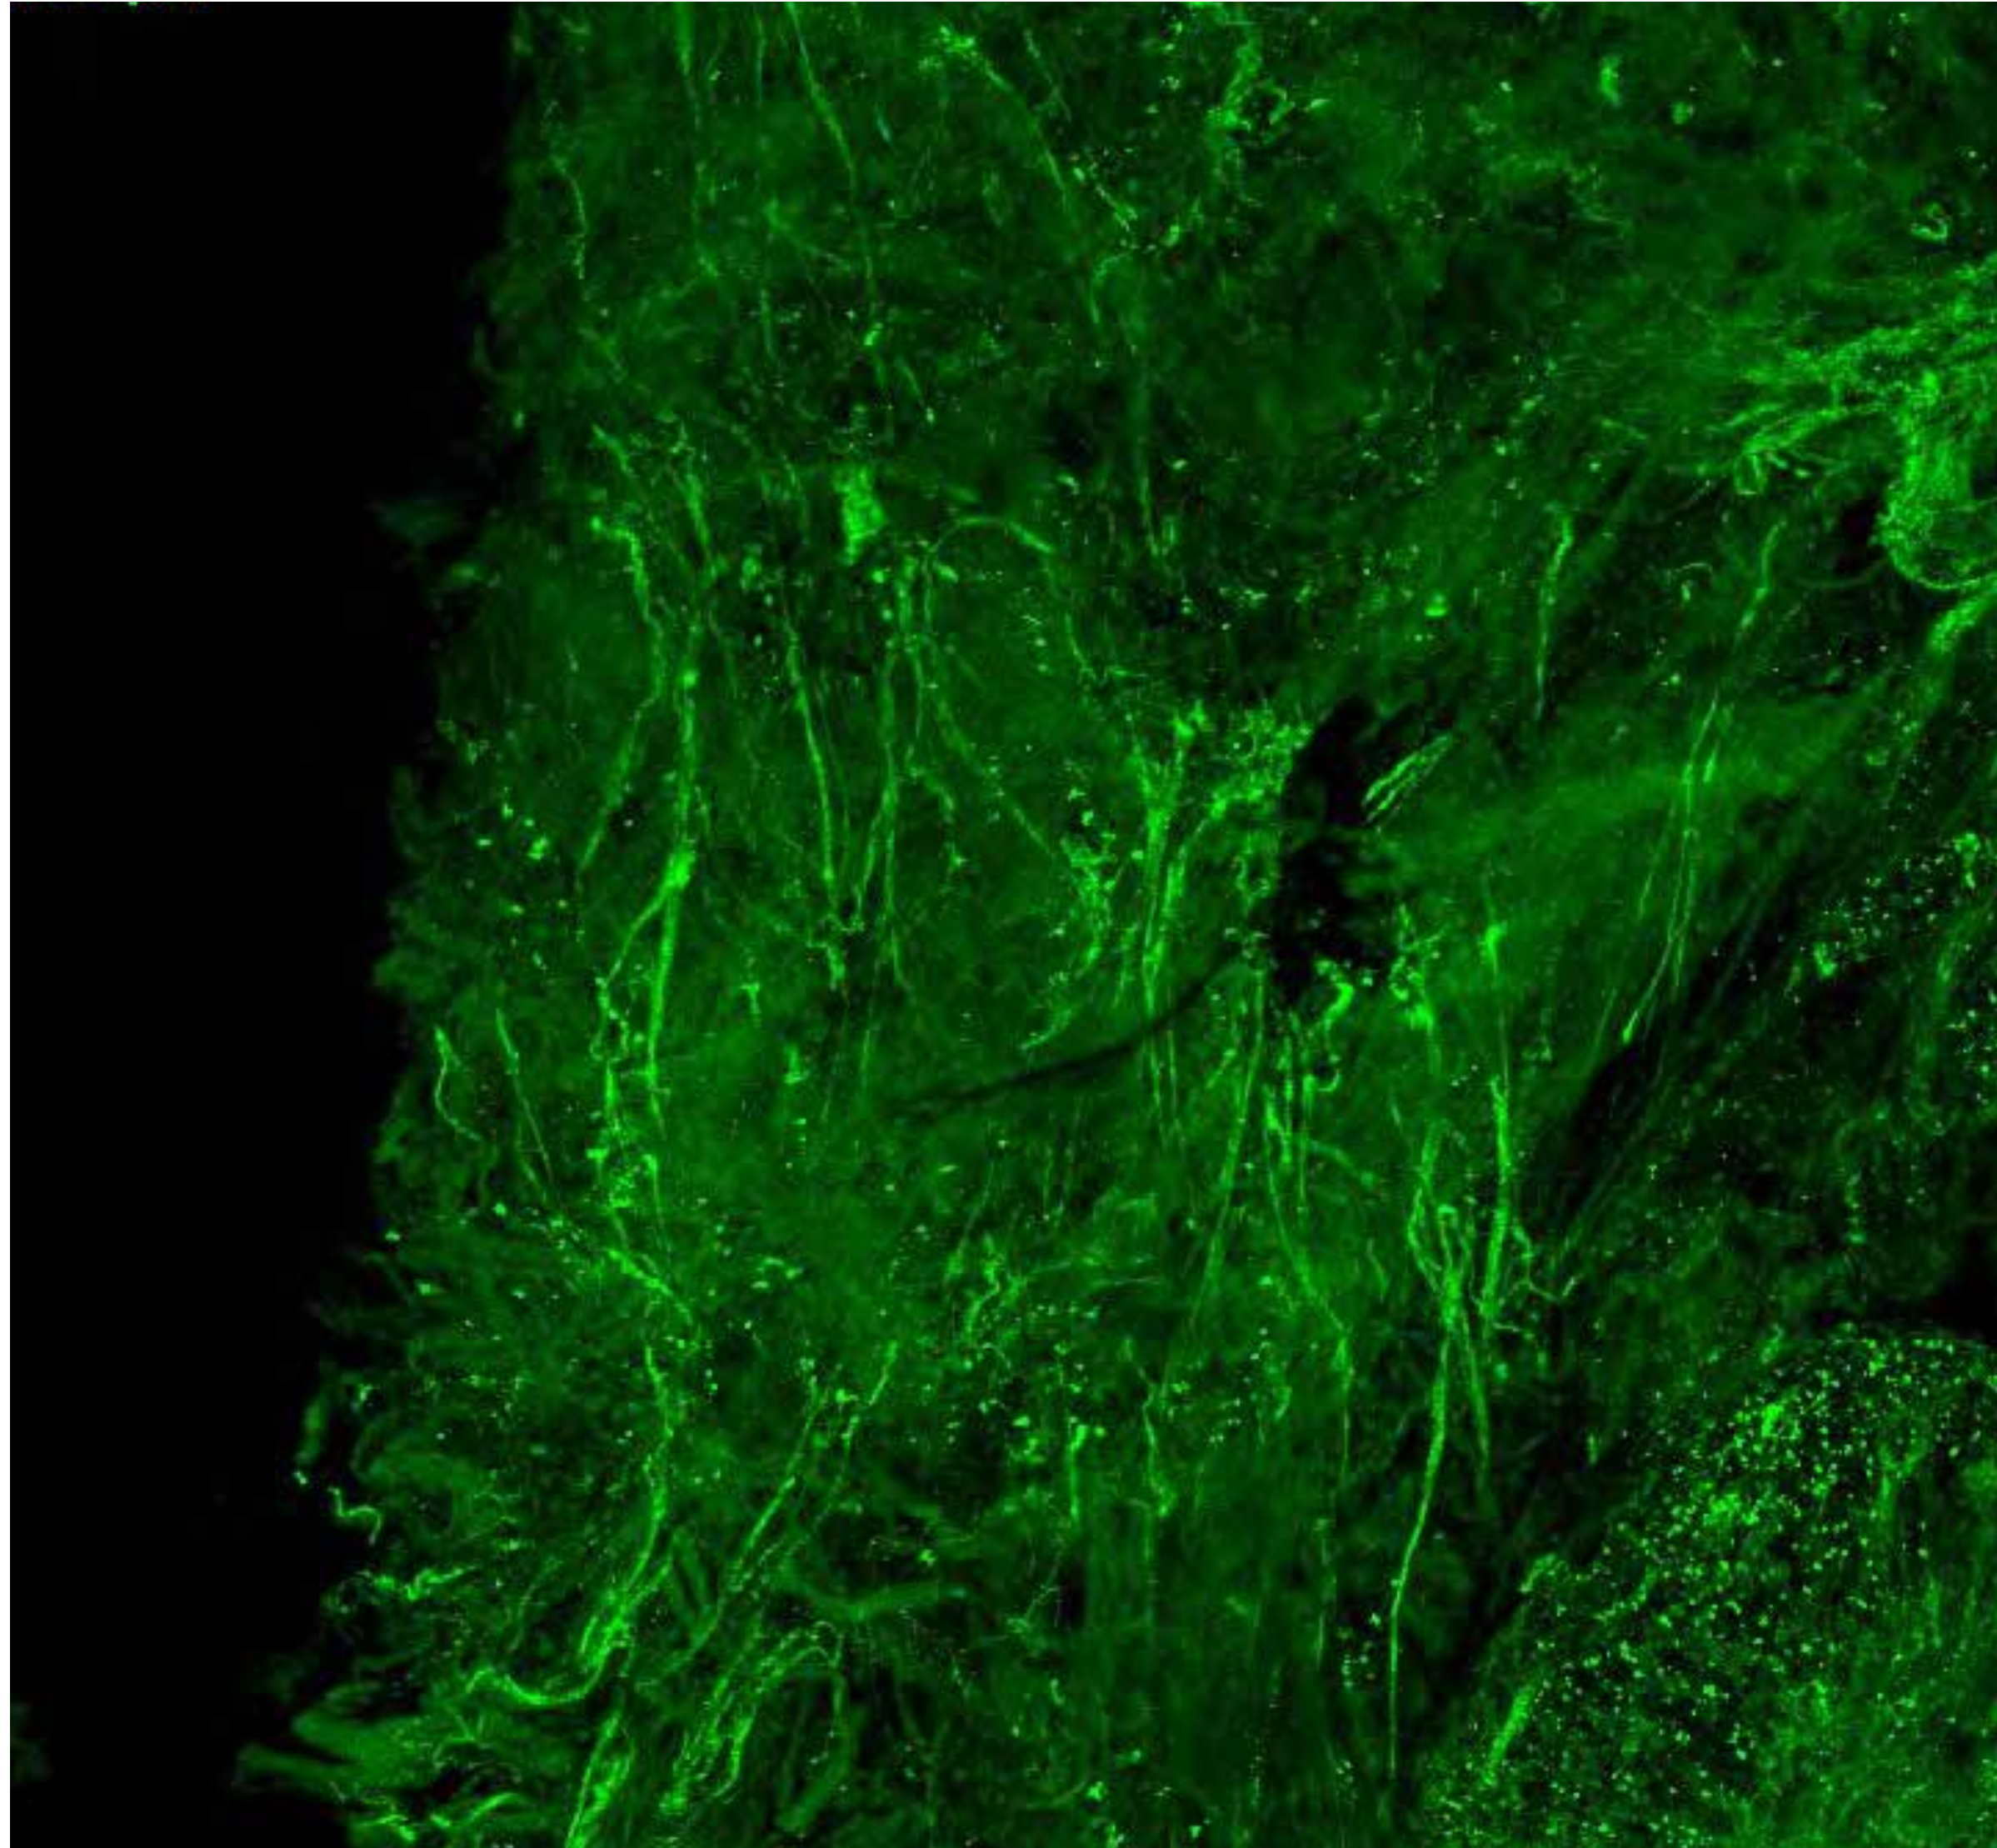

PARPi-FL only (green)

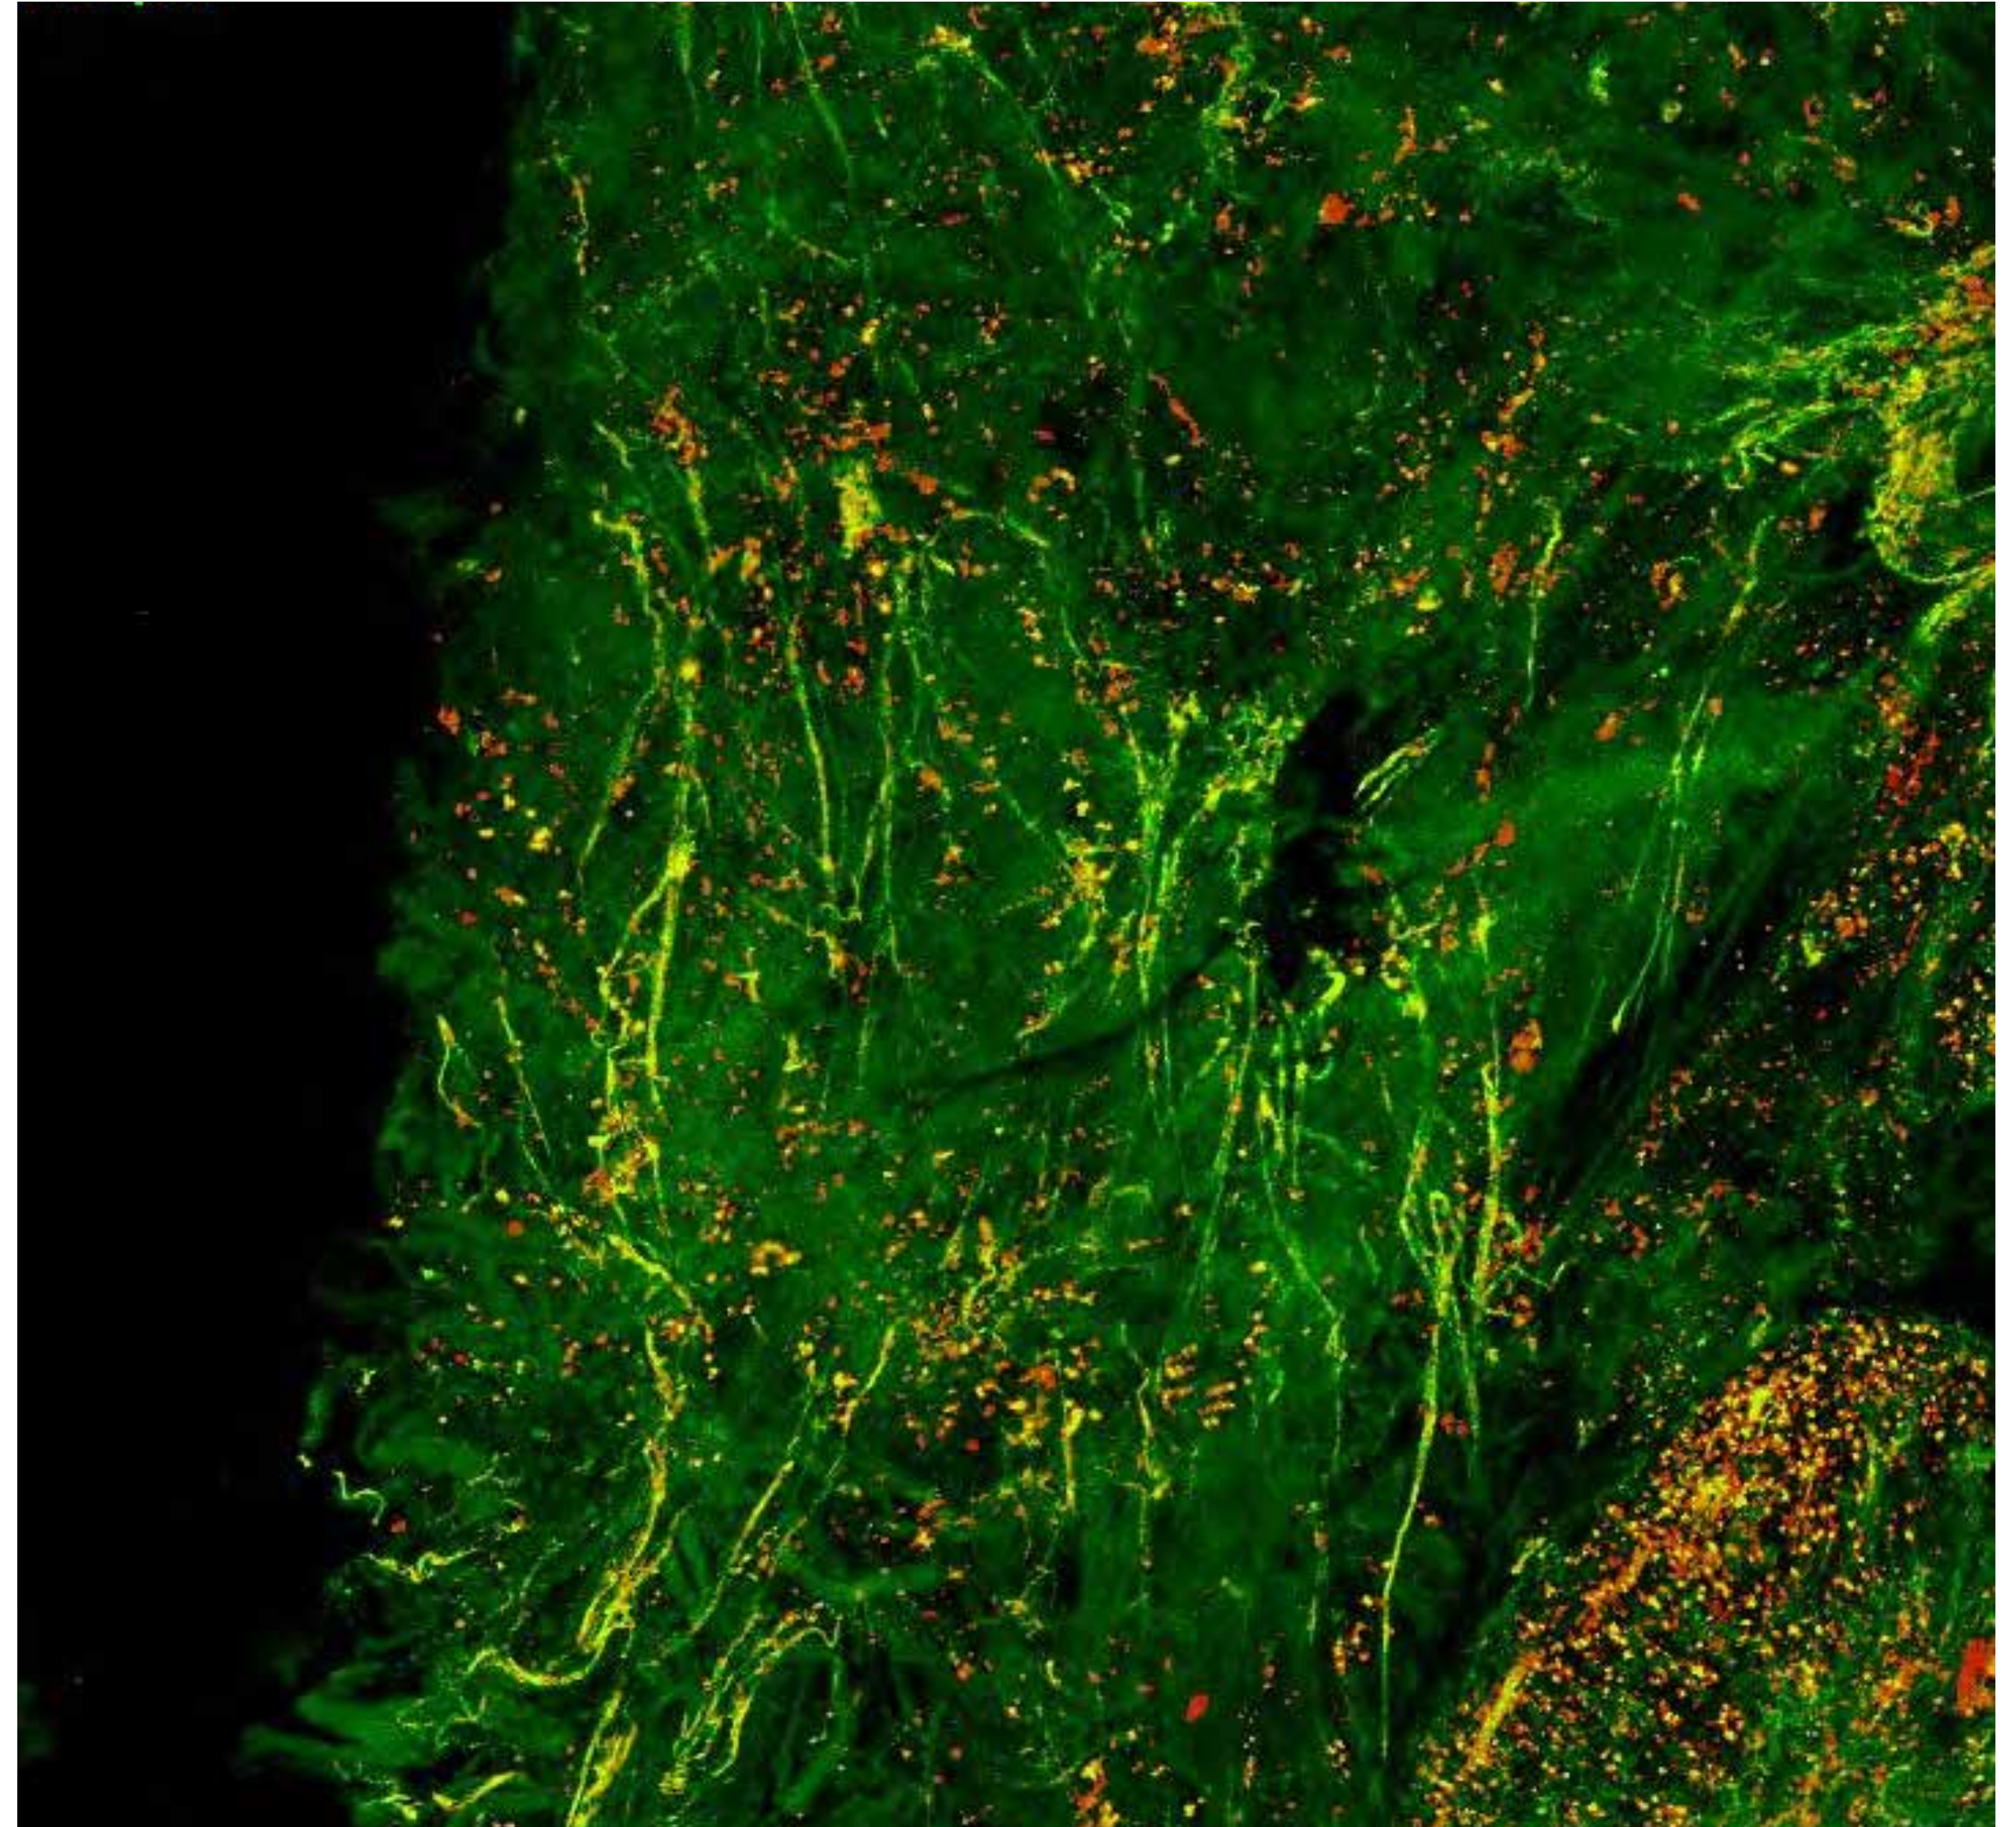

PARPi-FL (green) + Autofluorescence (red/yellow)



6344

Close-up

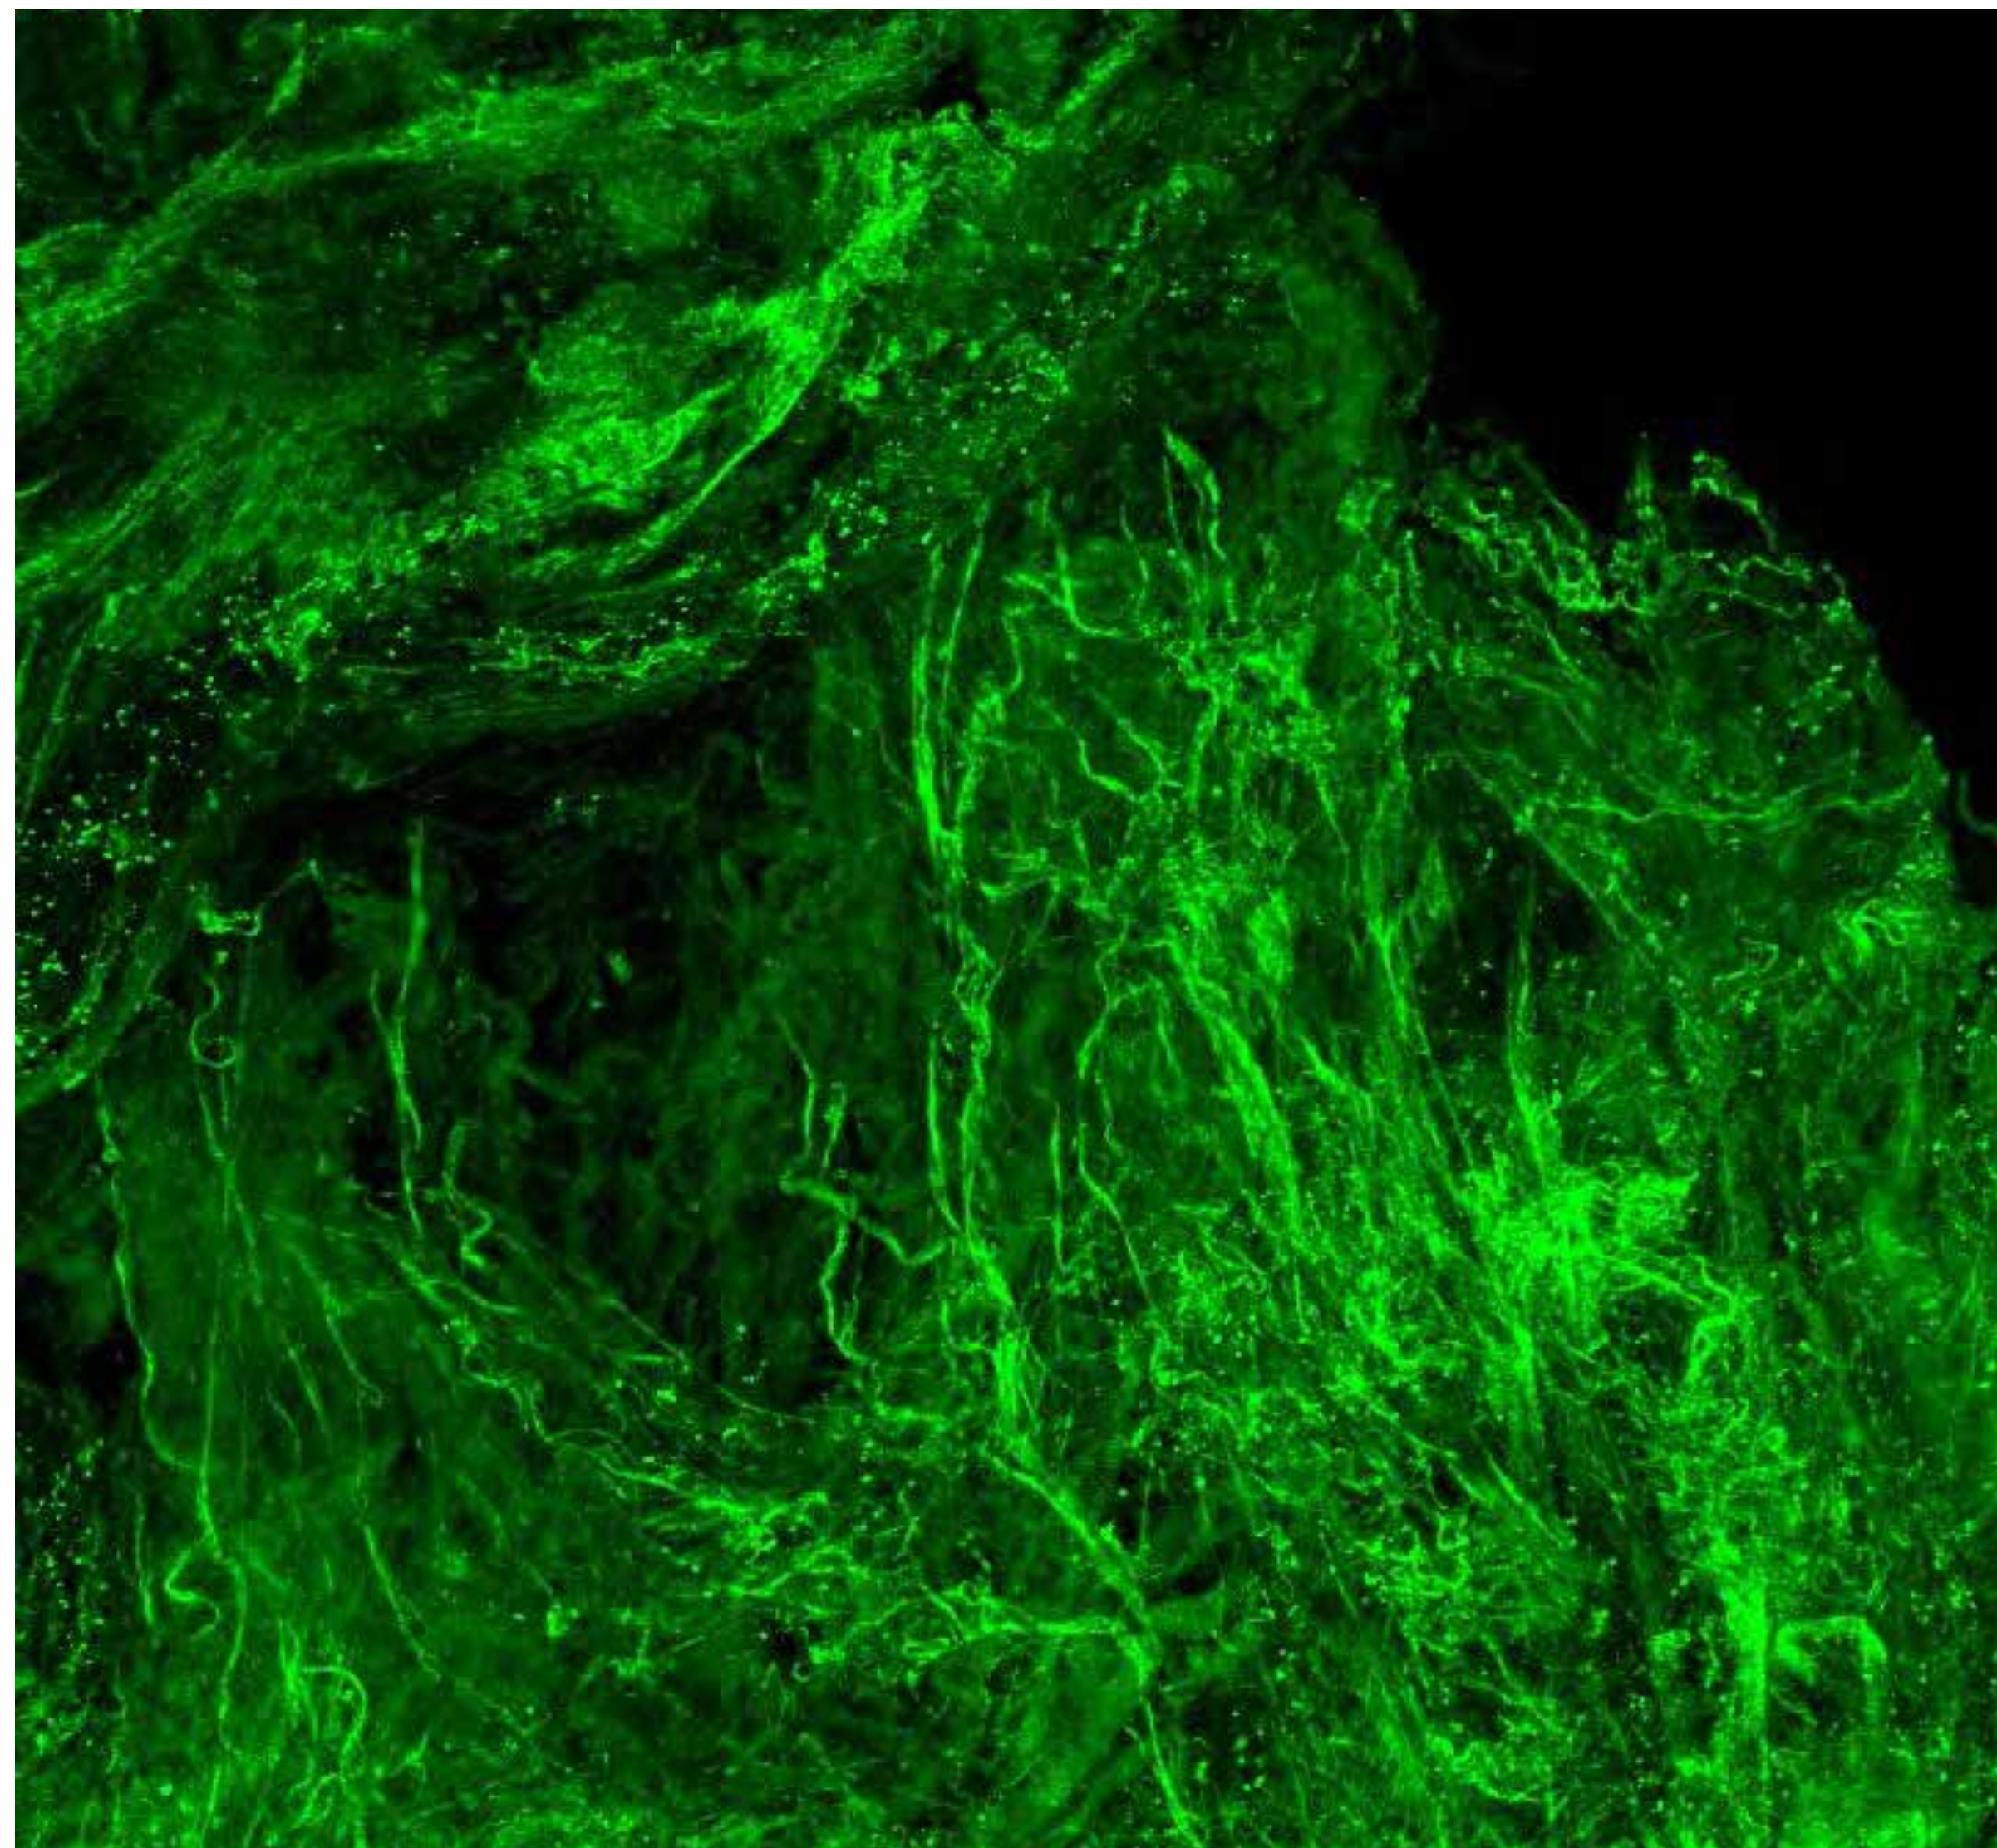

PARPi-FL only (green)

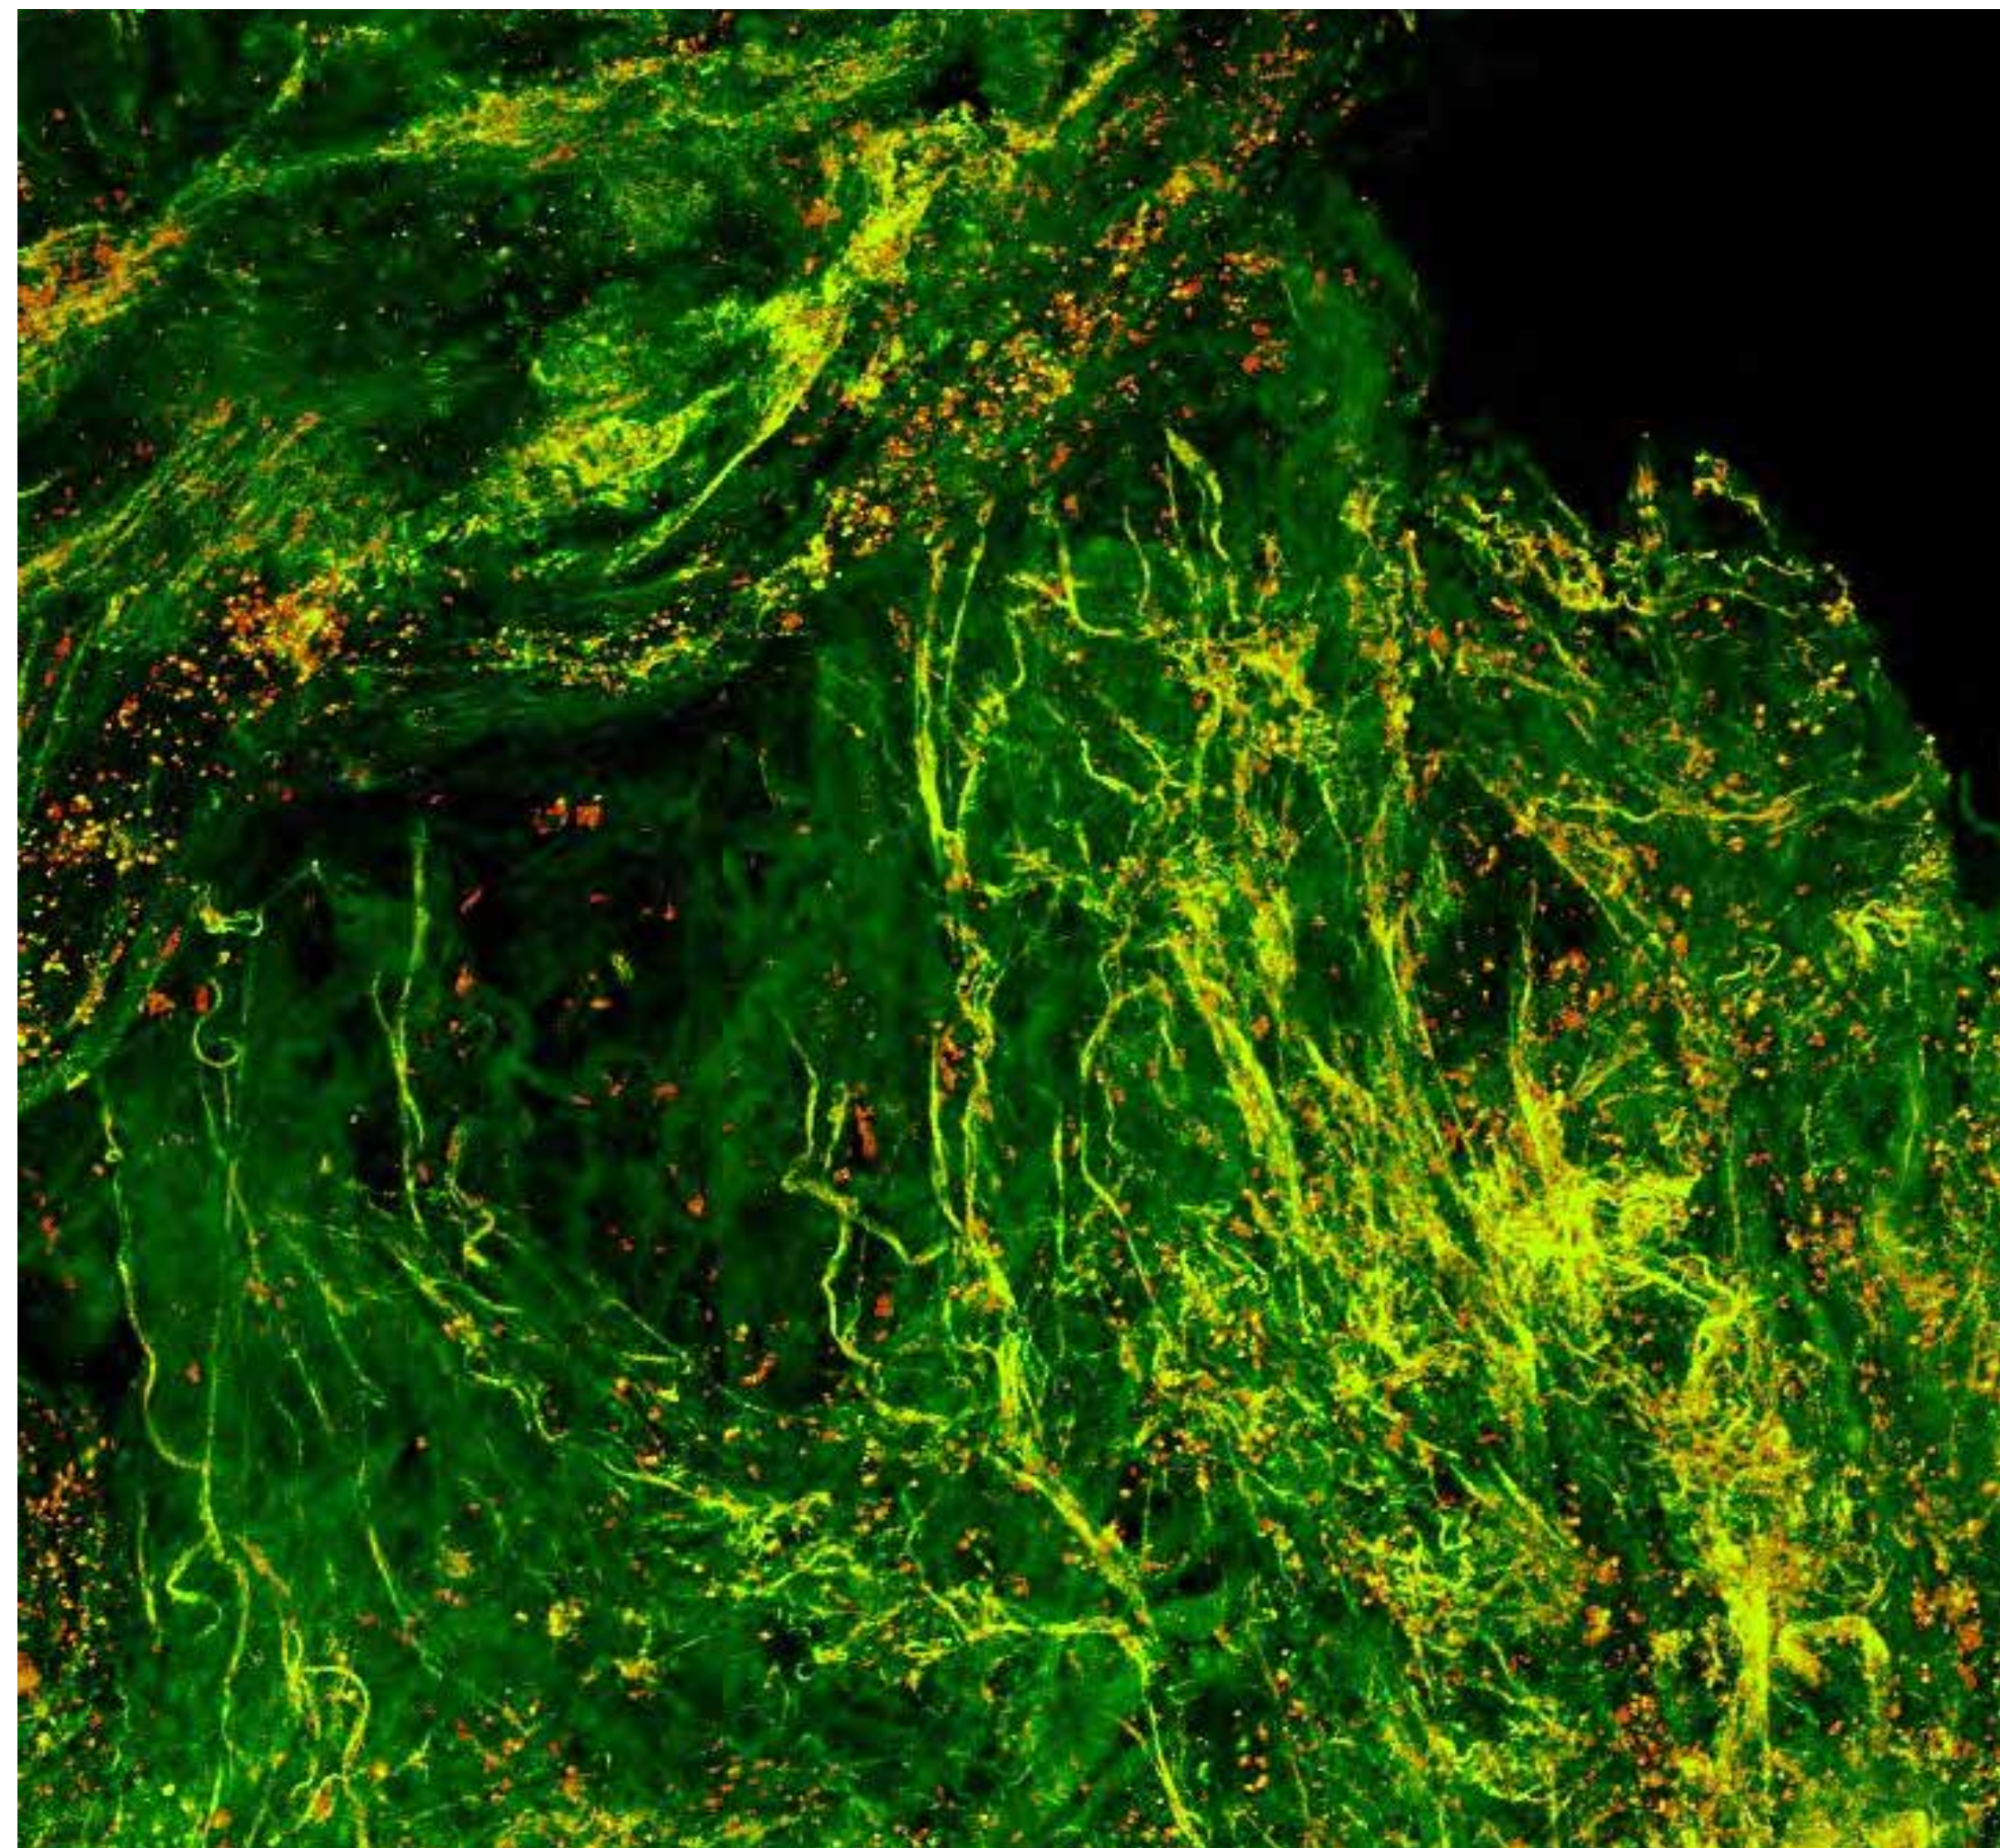

PARPi-FL (green) + Autofluorescence (red/yellow)



6344

10

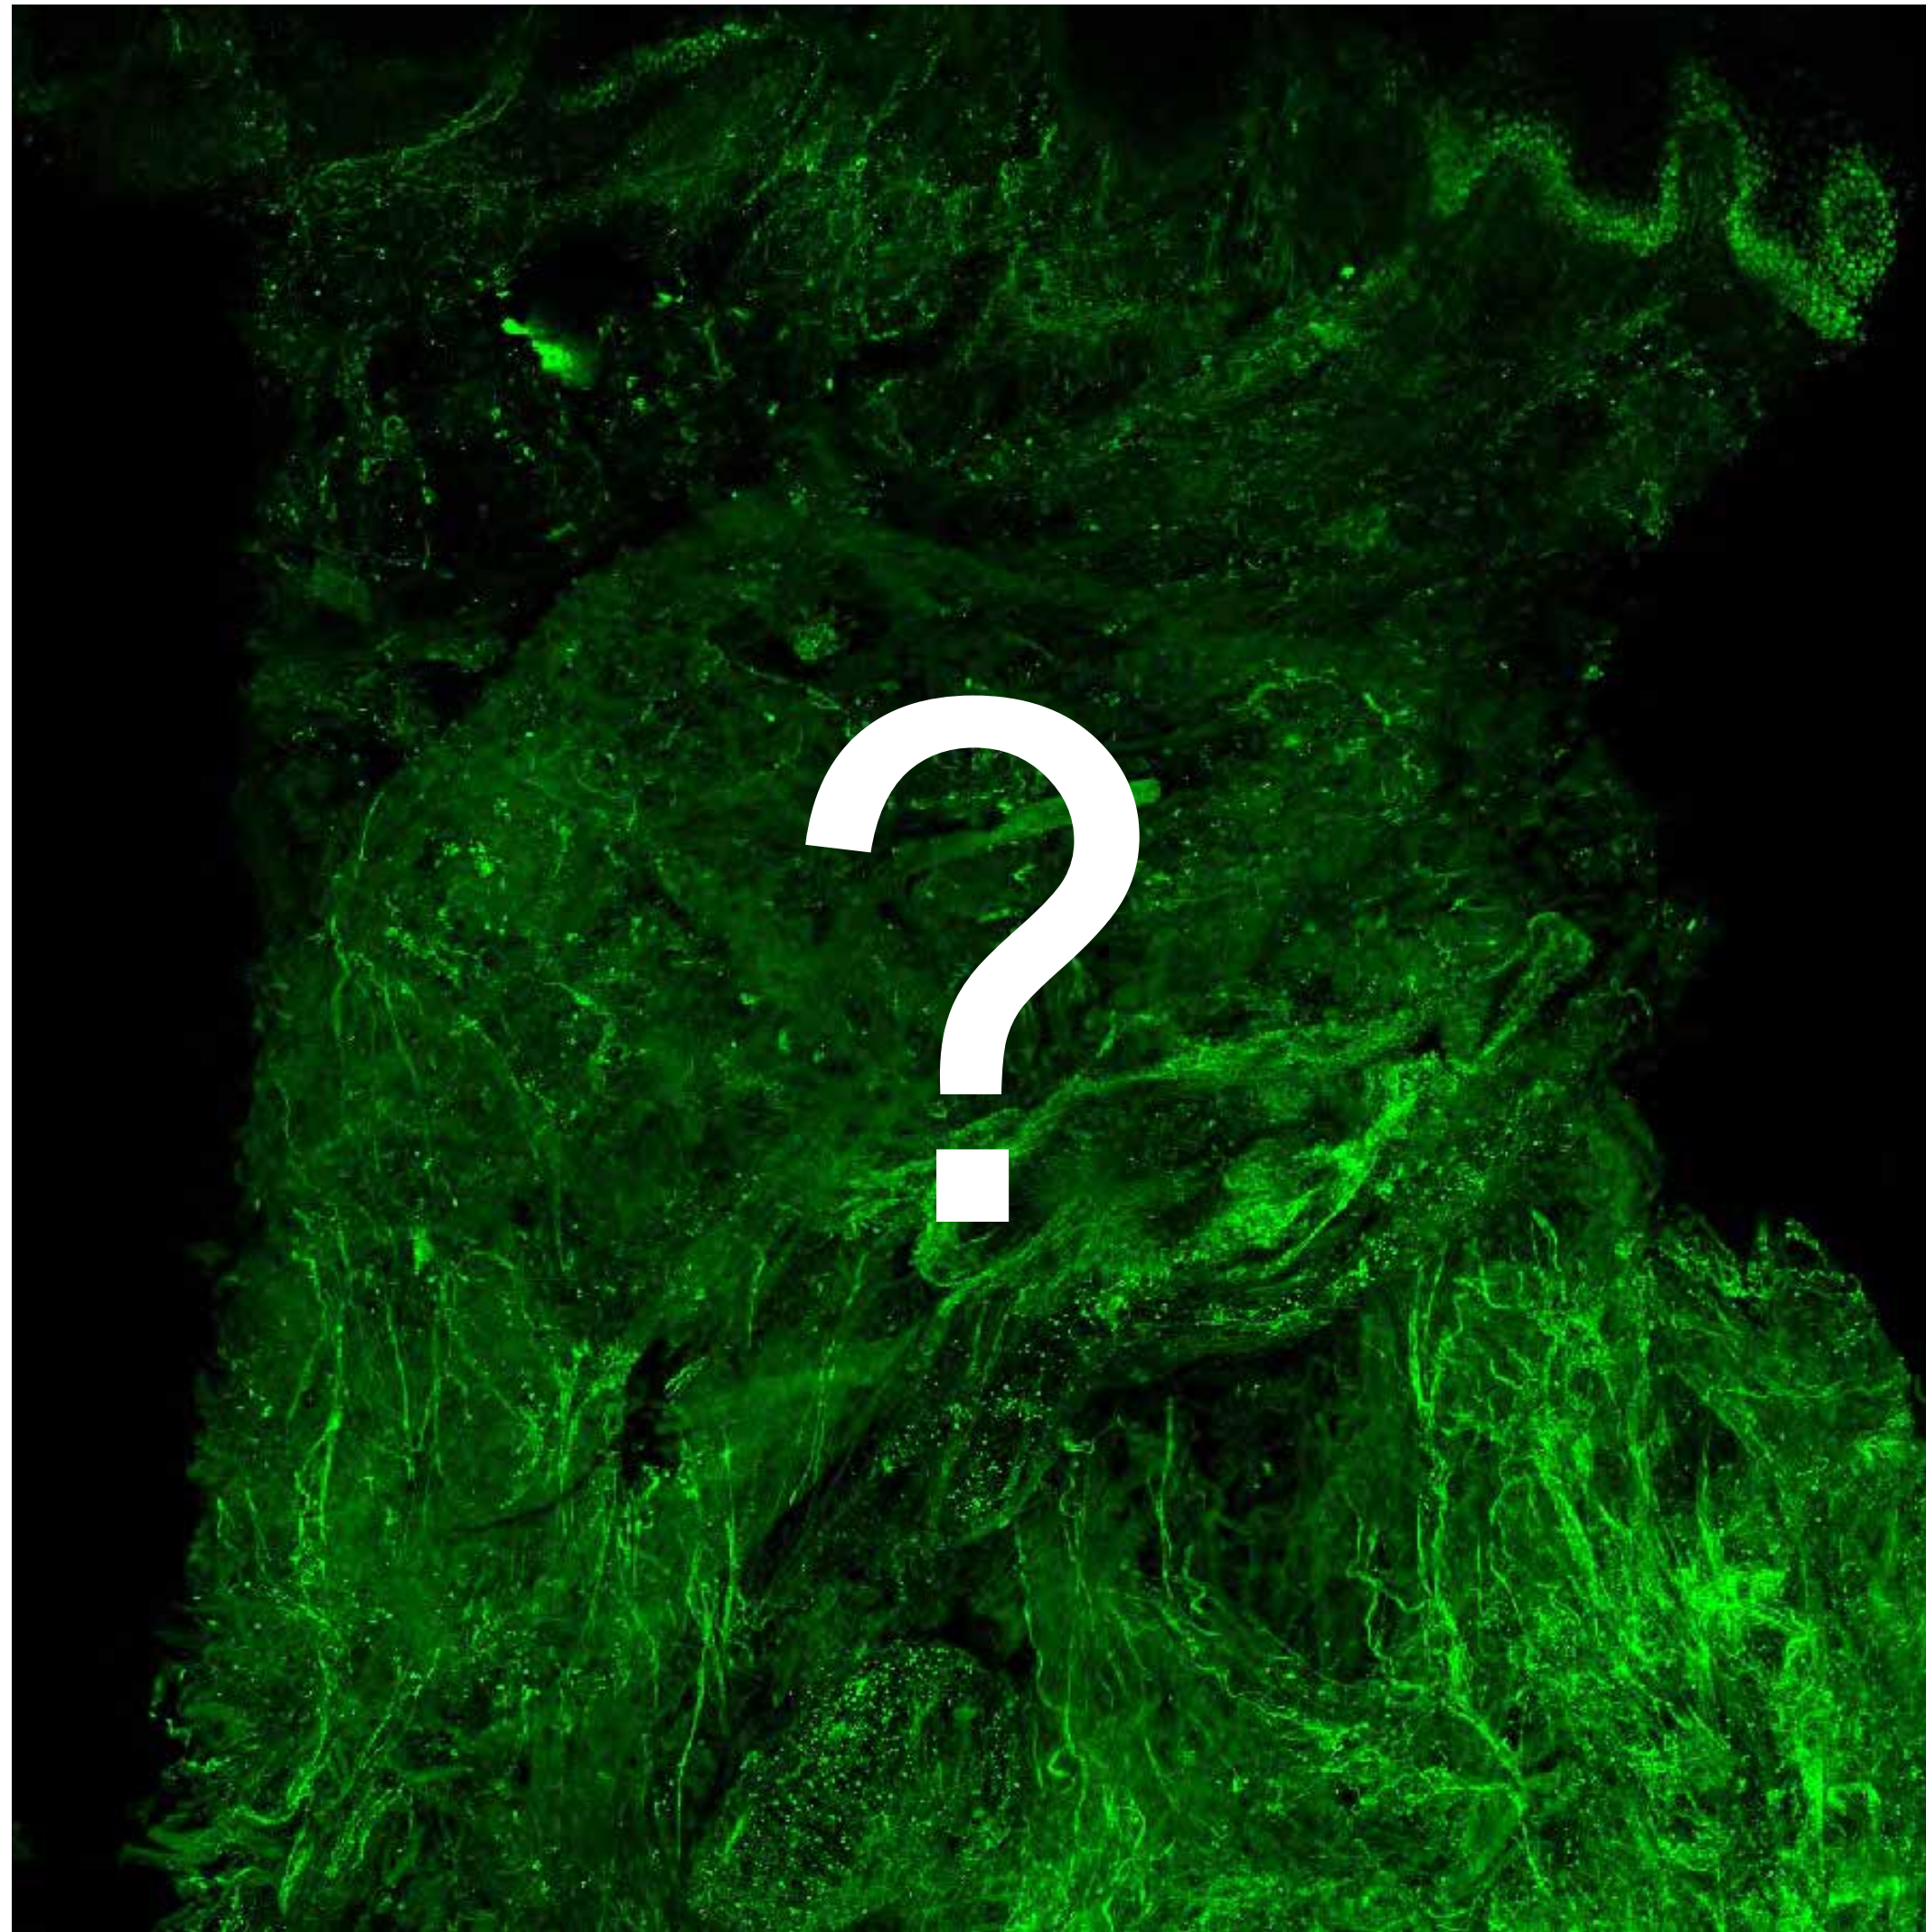

Tumor

Margin



9813

# Overview

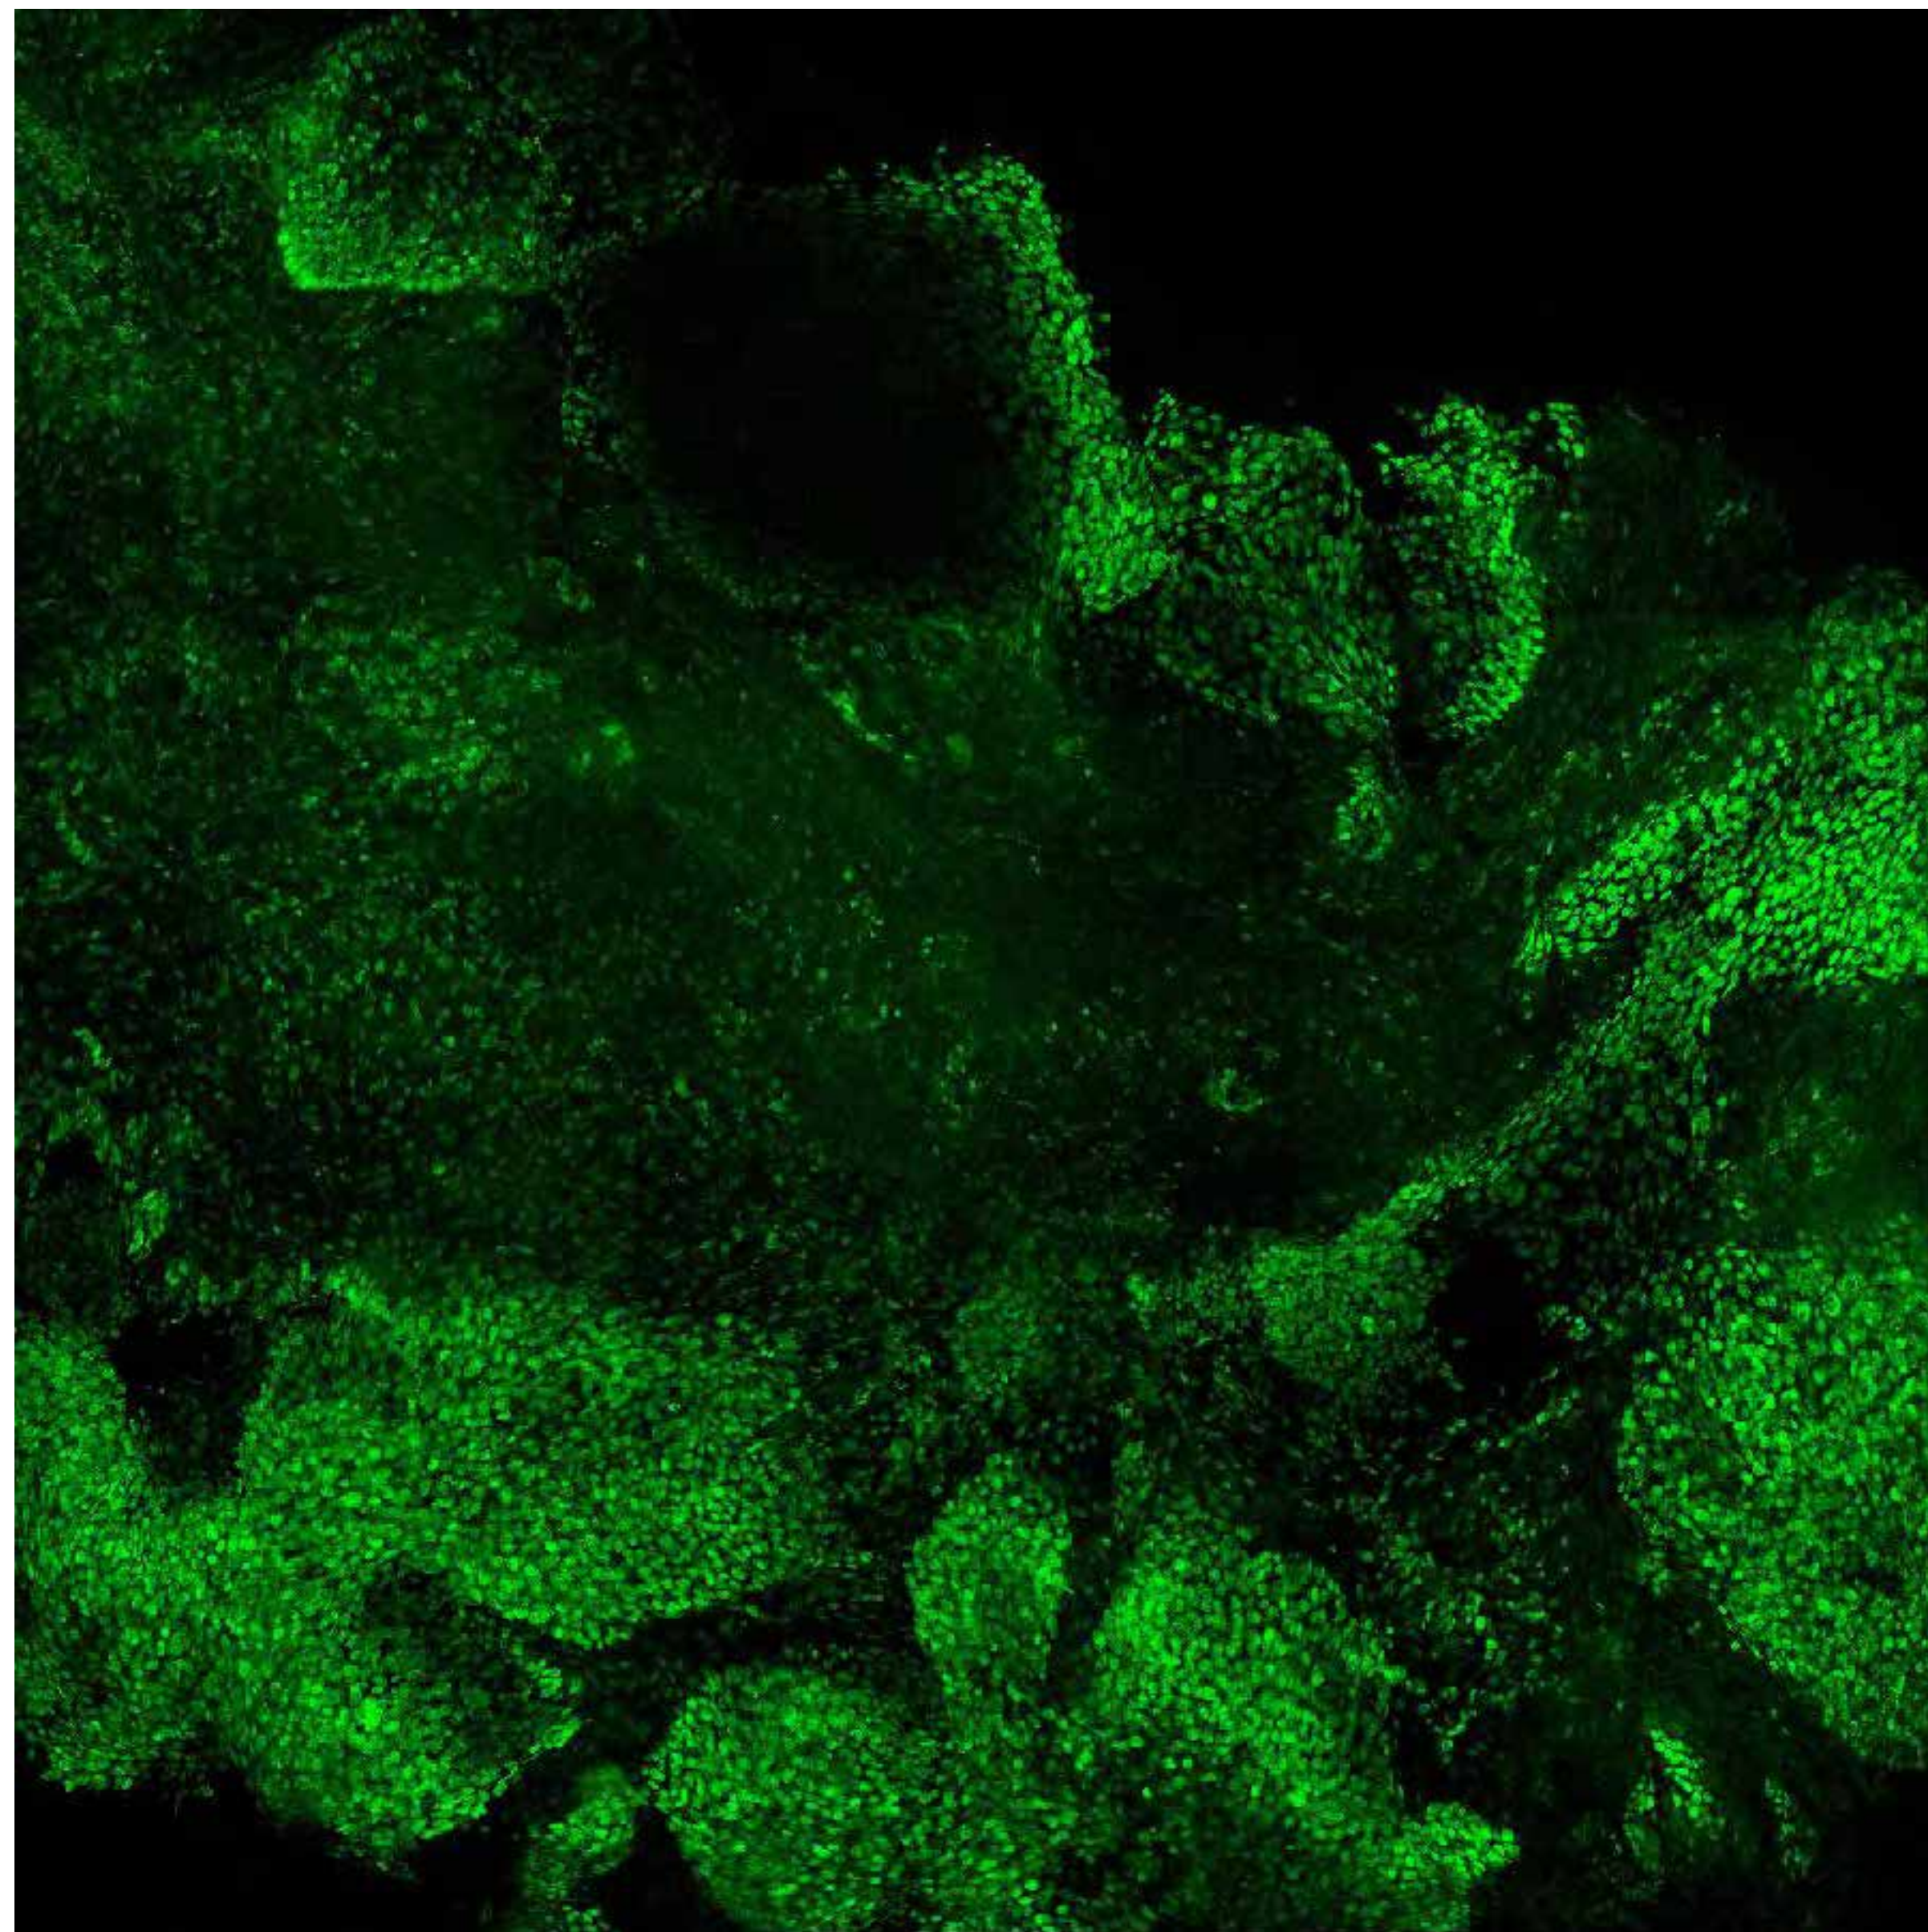

PARPi-FL only (green)

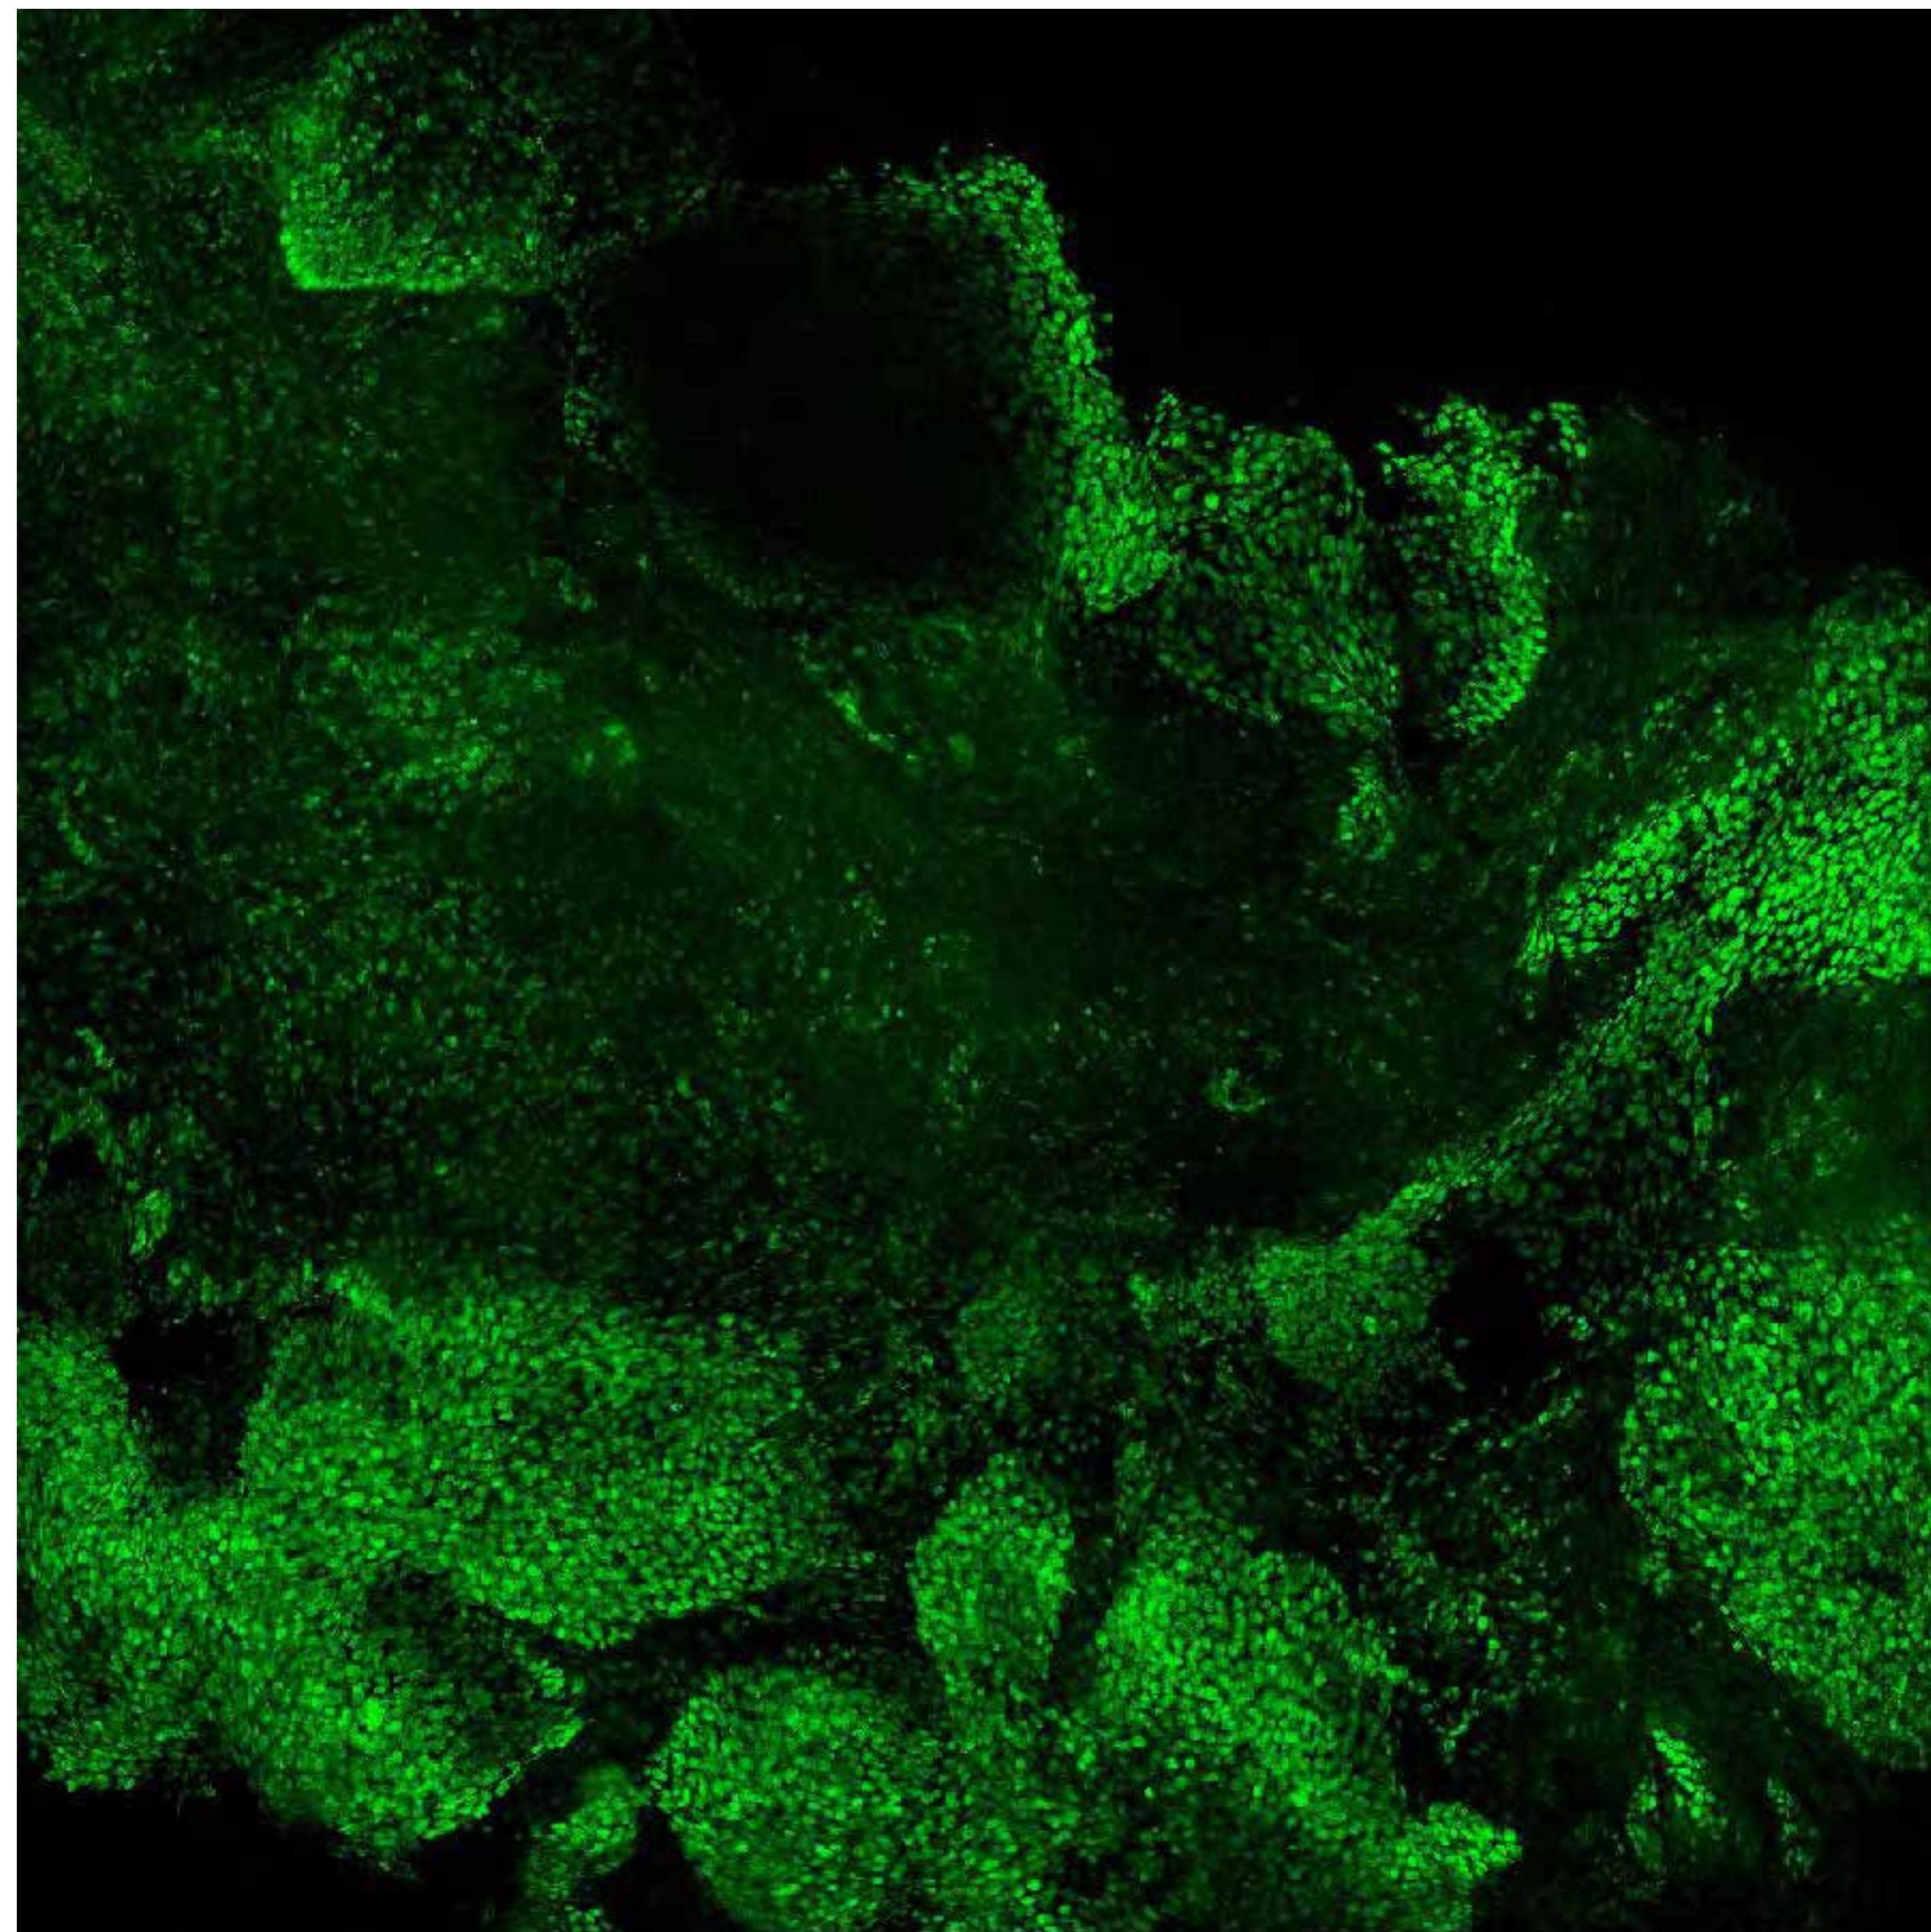

PARPi-FL (green) + Autofluorescence (red/yellow)



9813

Close-up

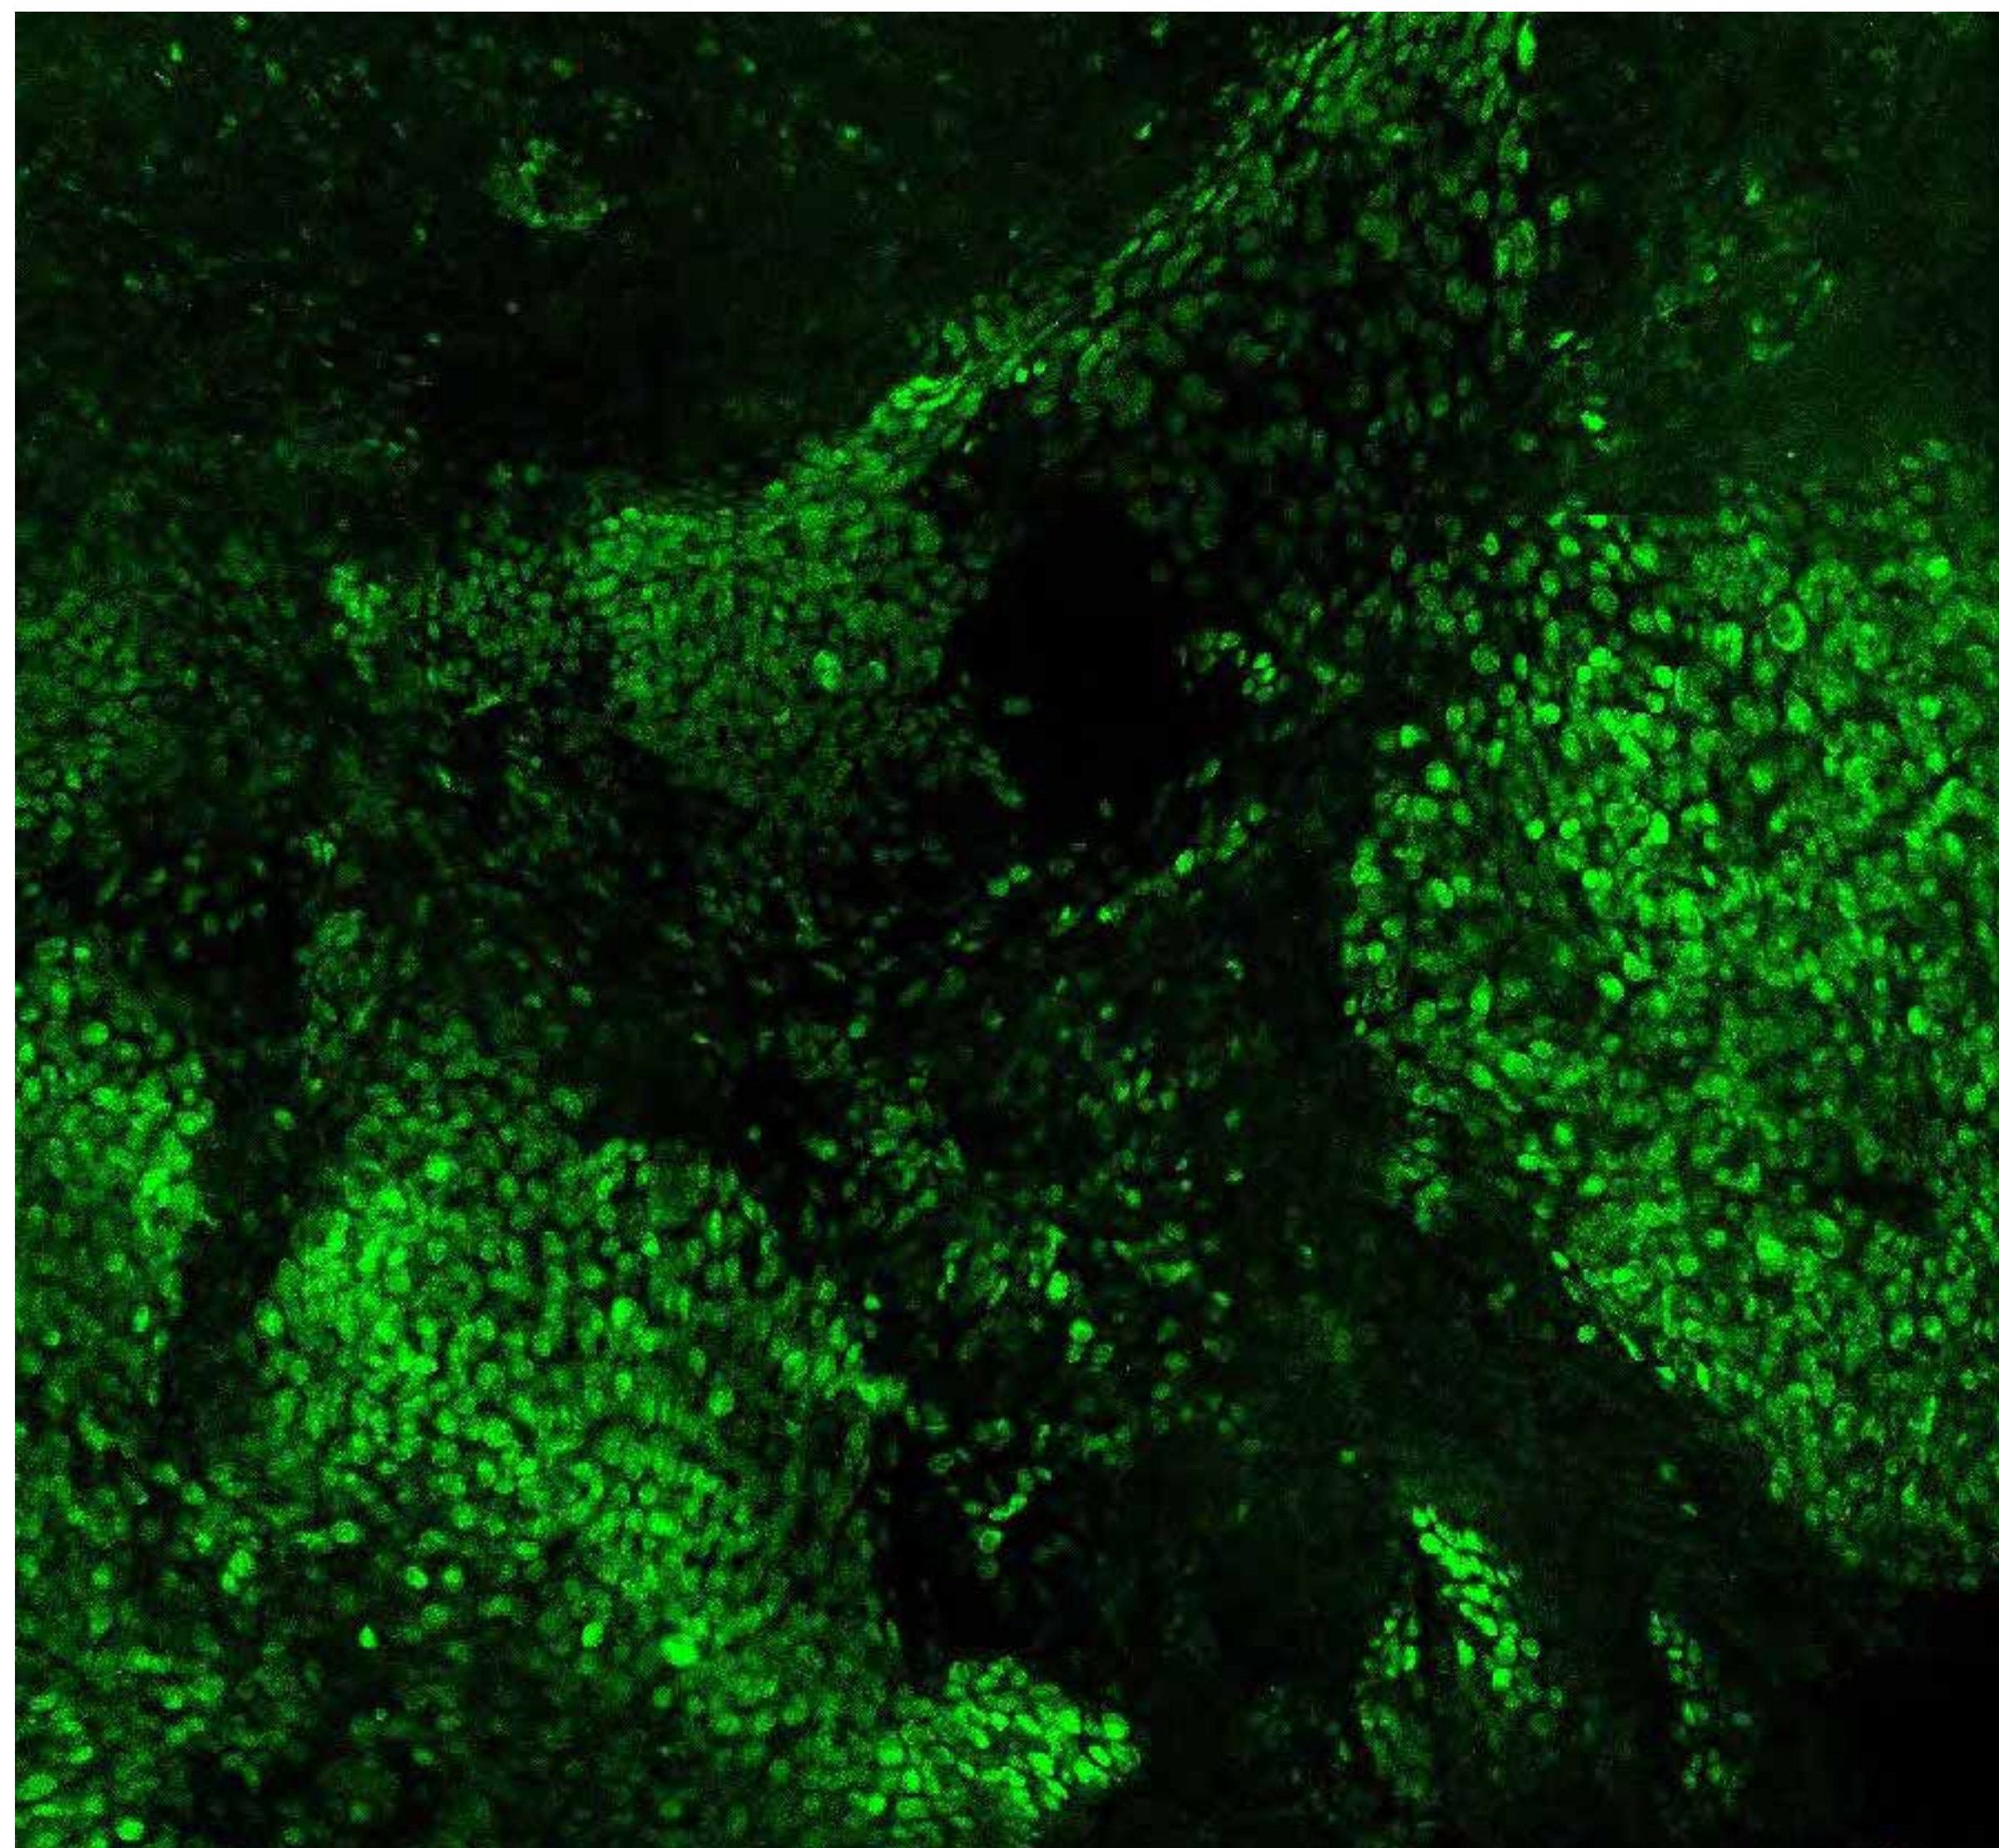

PARPi-FL only (green)

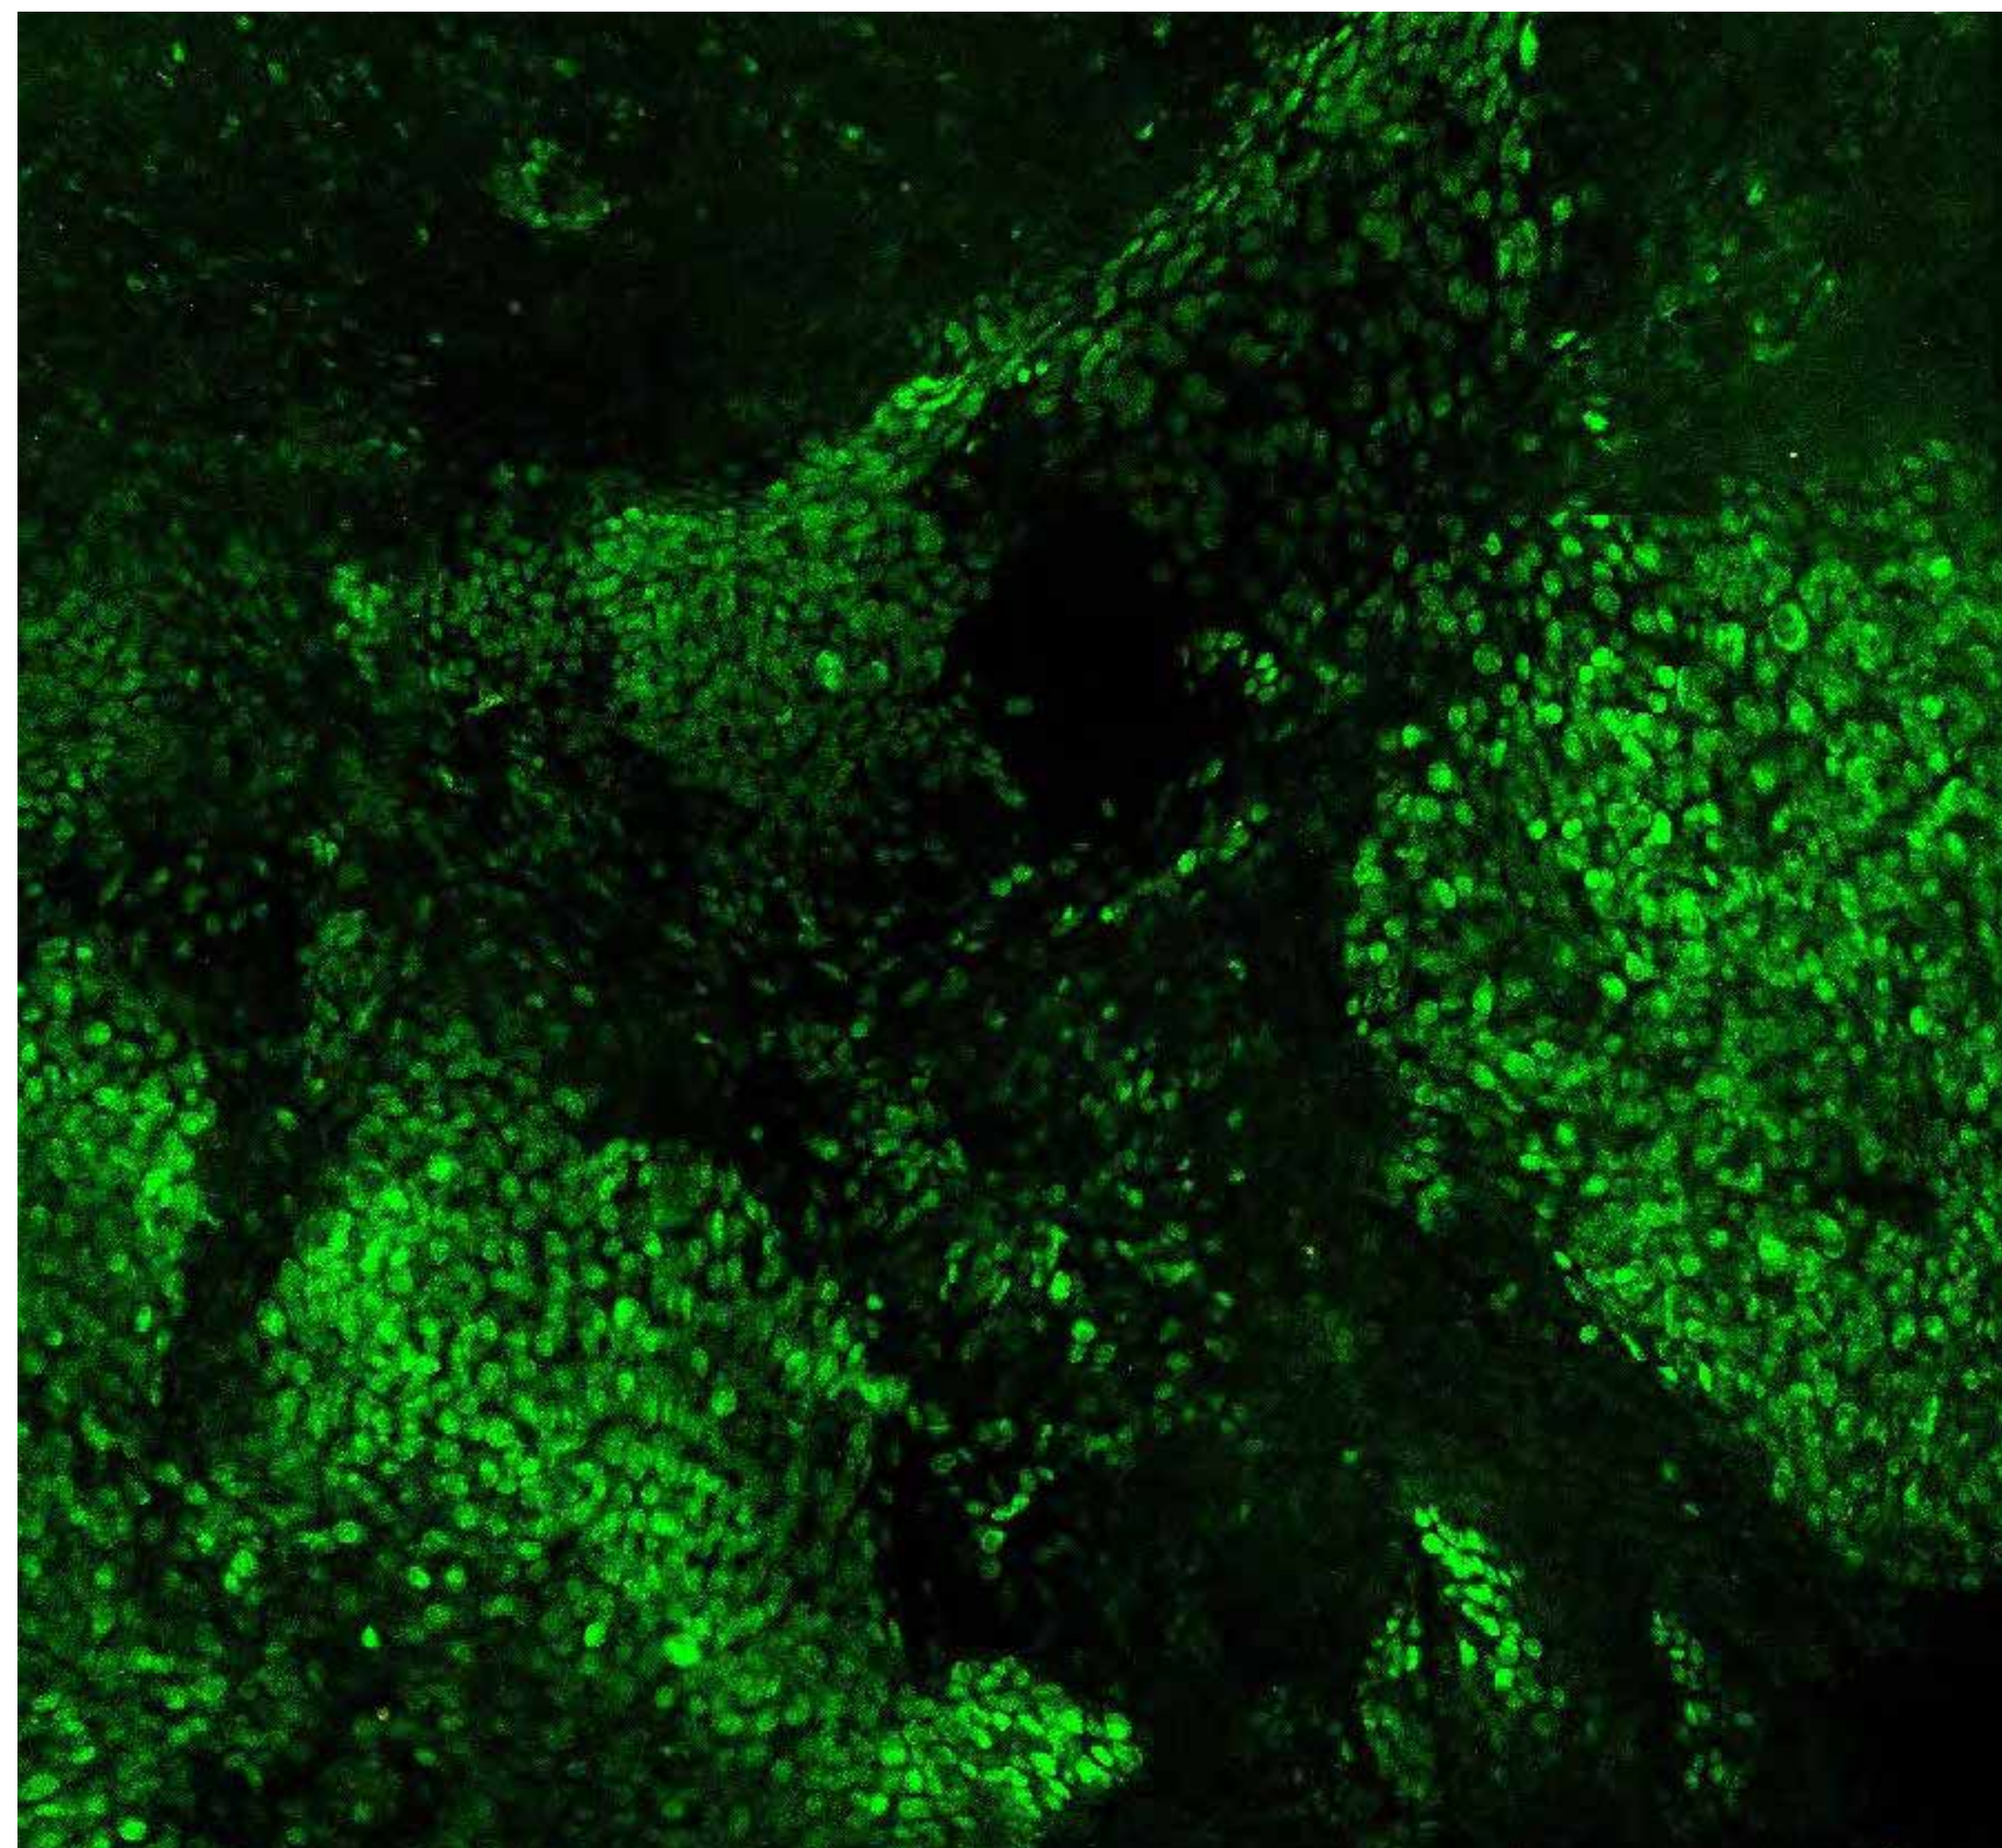

PARPi-FL (green) + Autofluorescence (red/yellow)



9813

Close-up

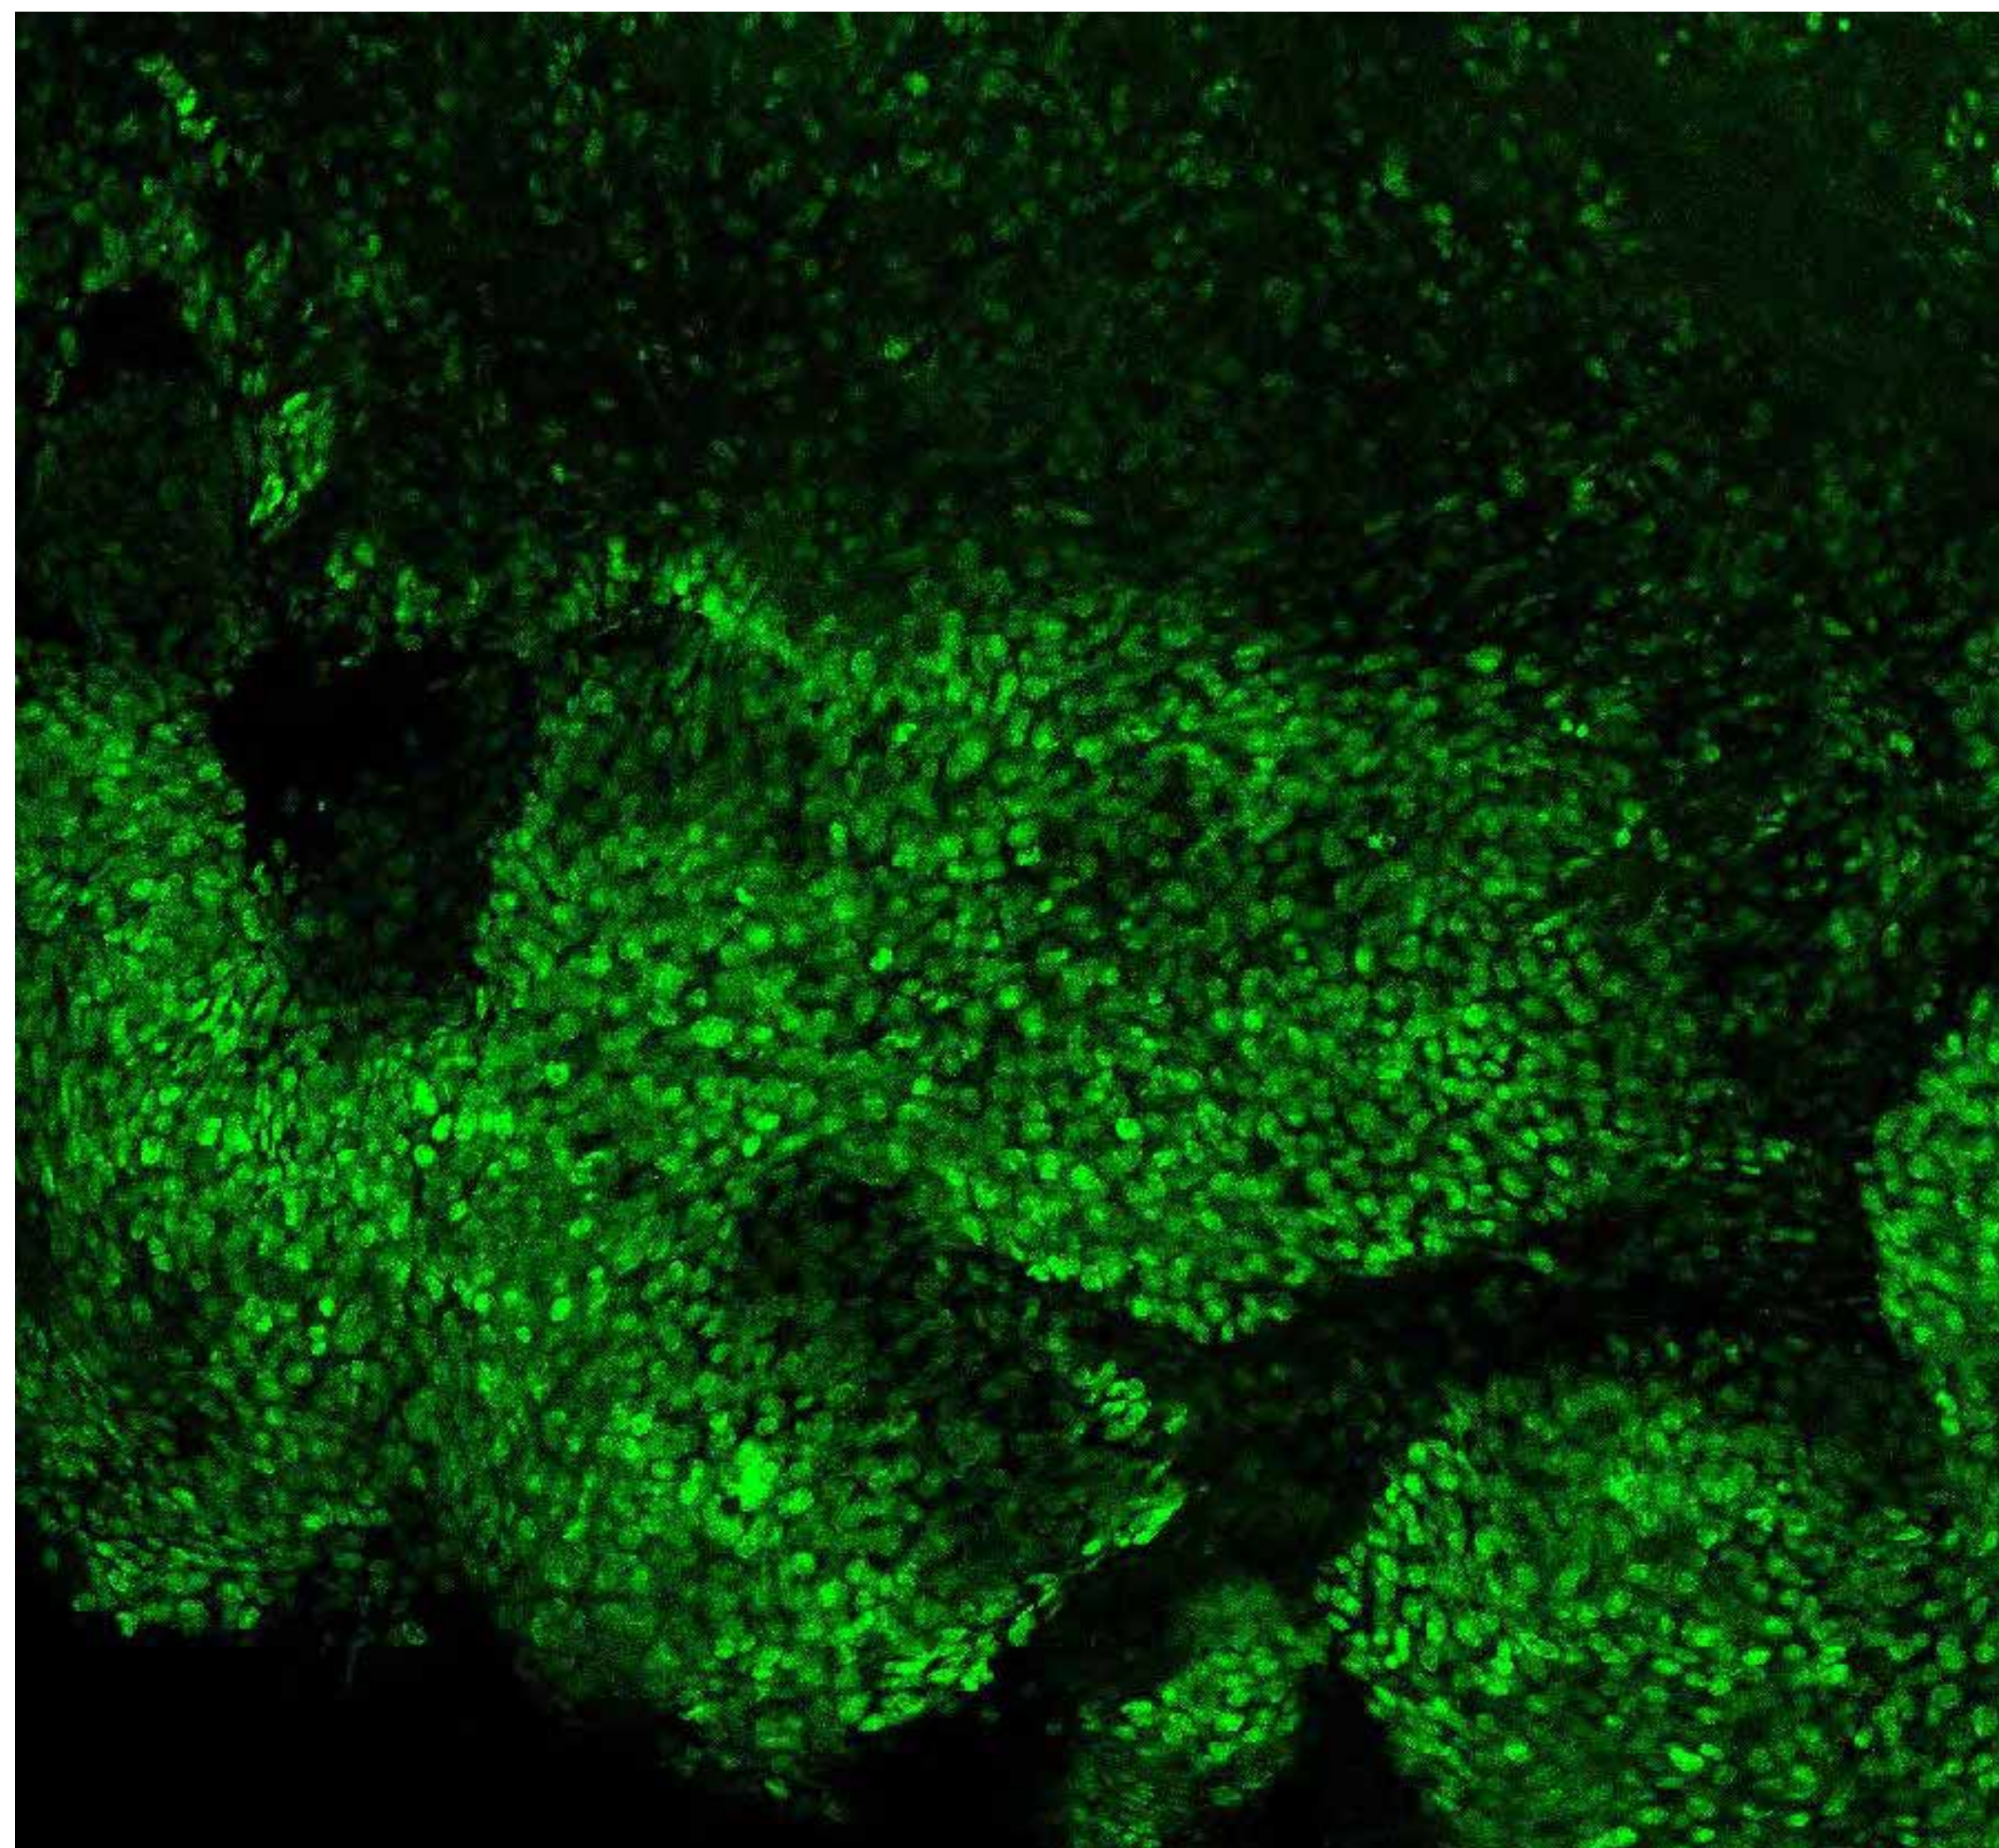

PARPi-FL only (green)

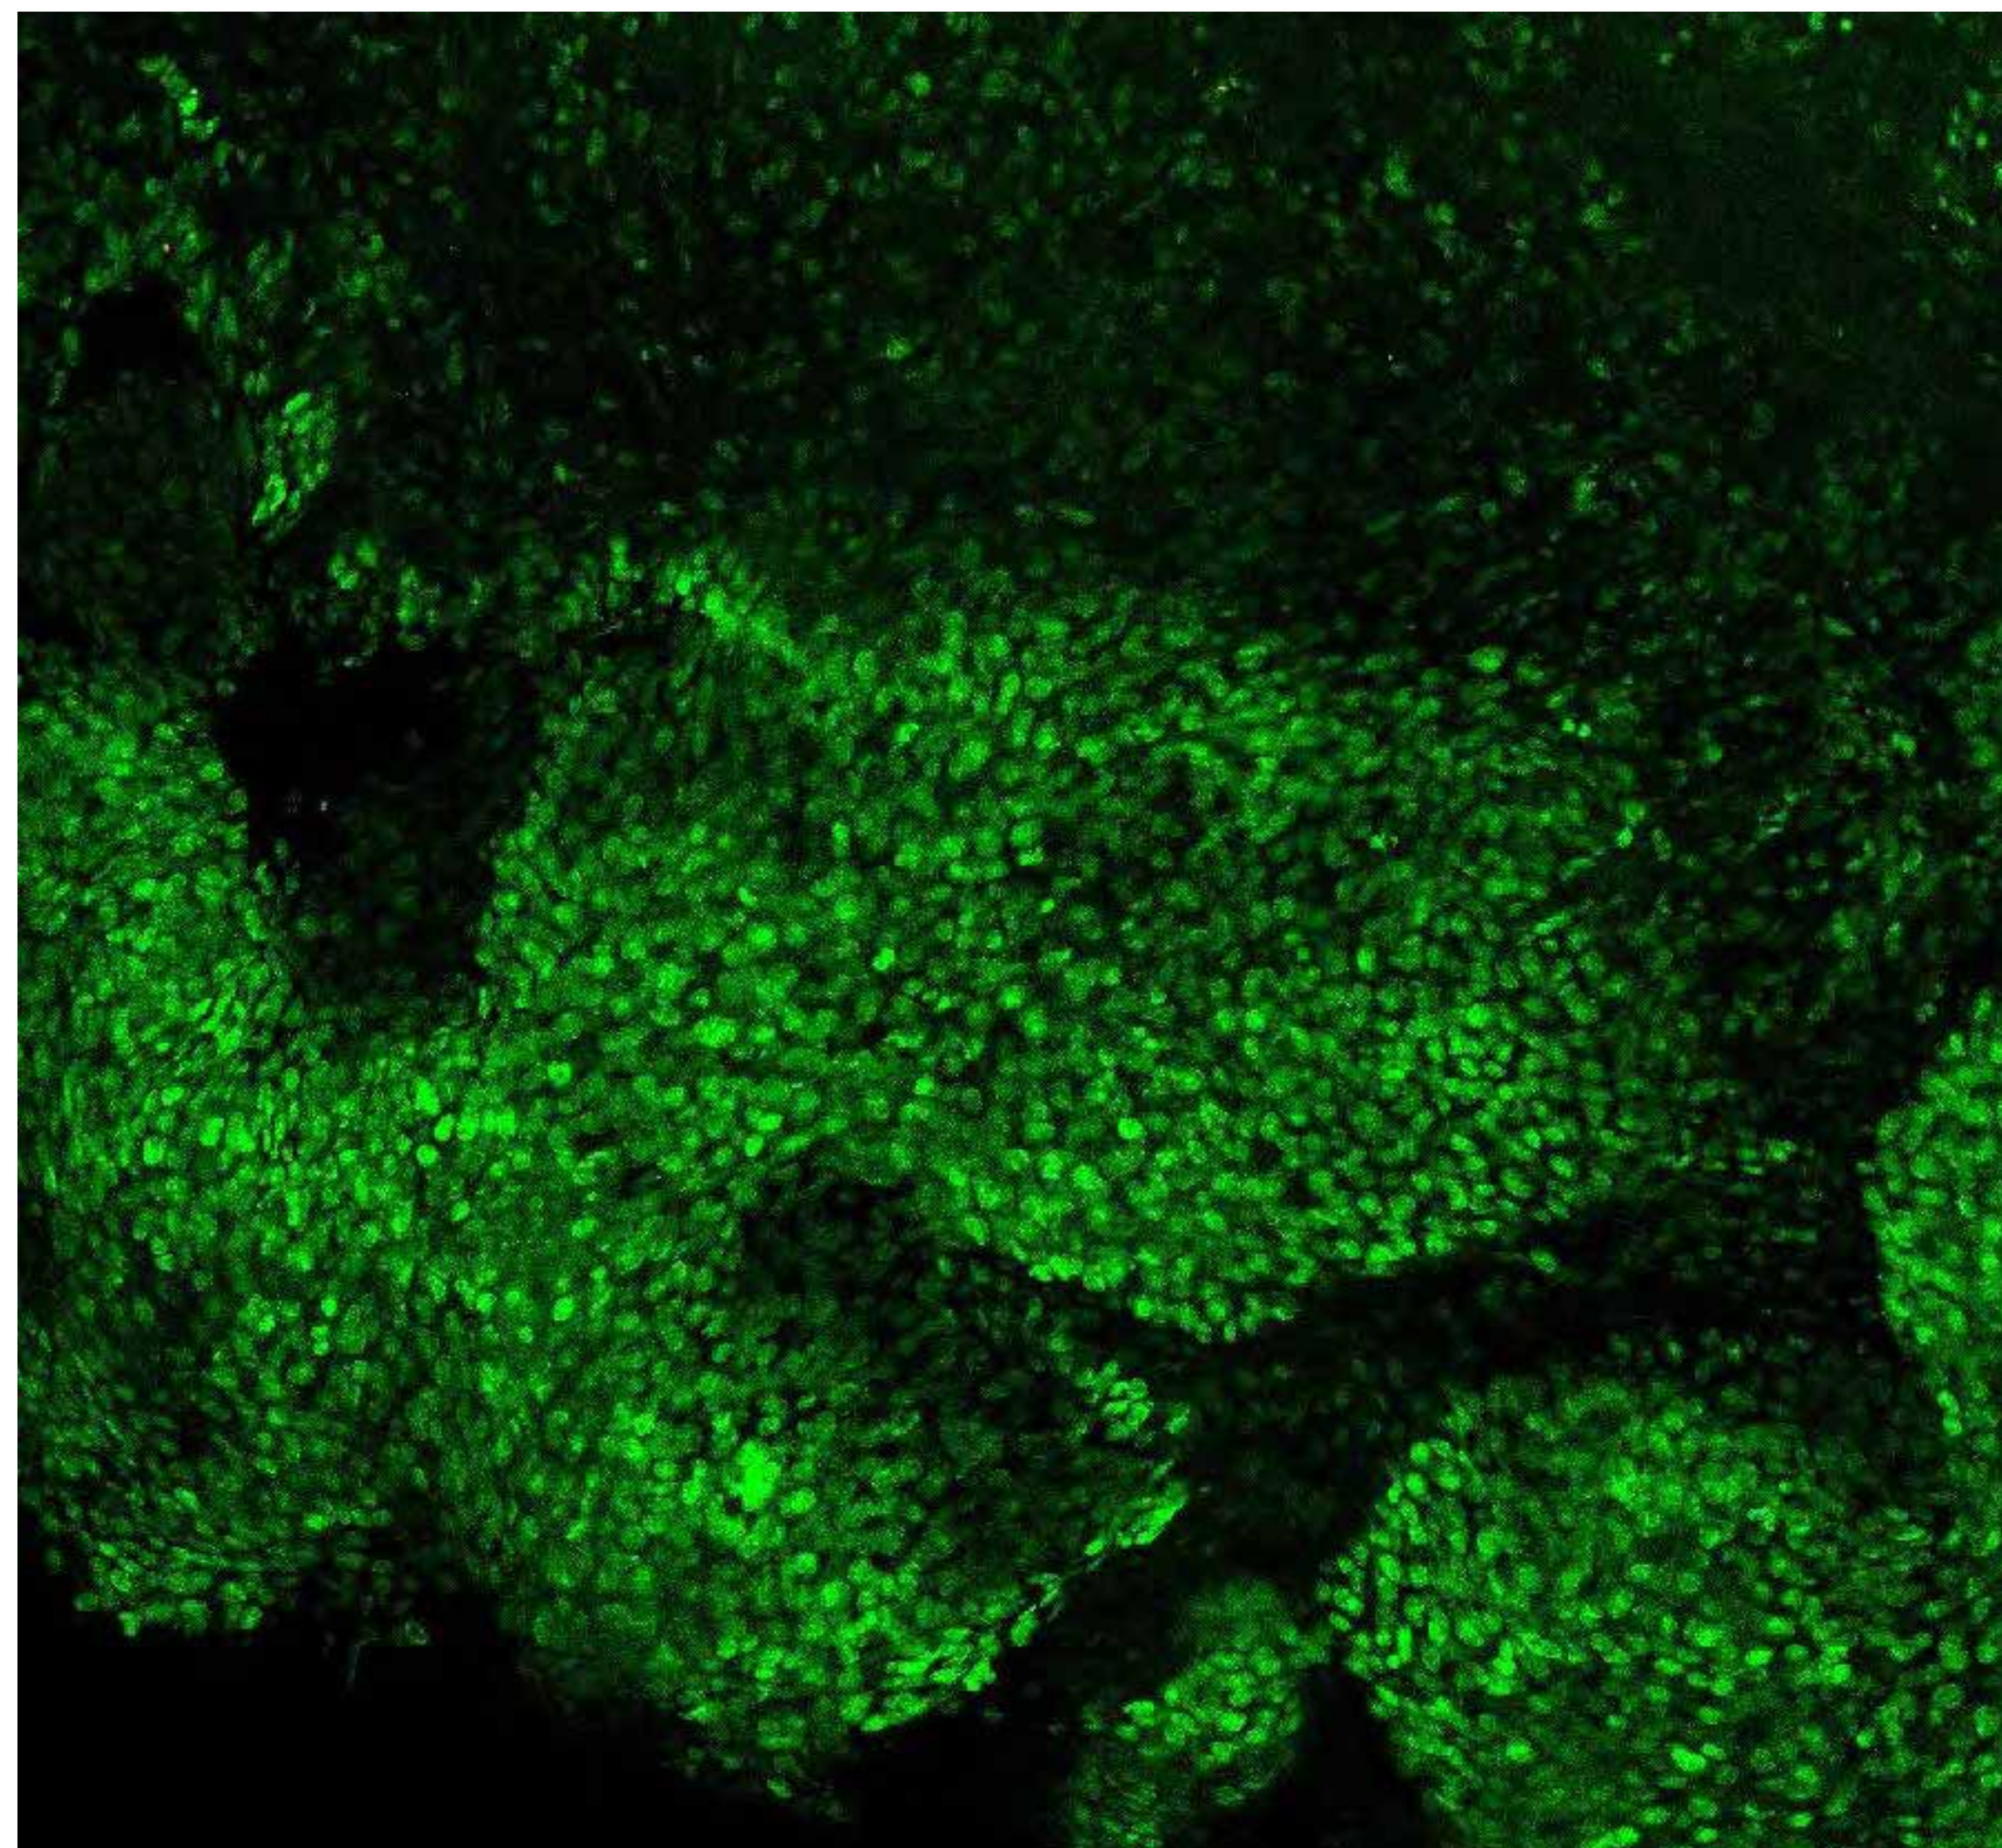

PARPi-FL (green) + Autofluorescence (red/yellow)



9813

Close-up

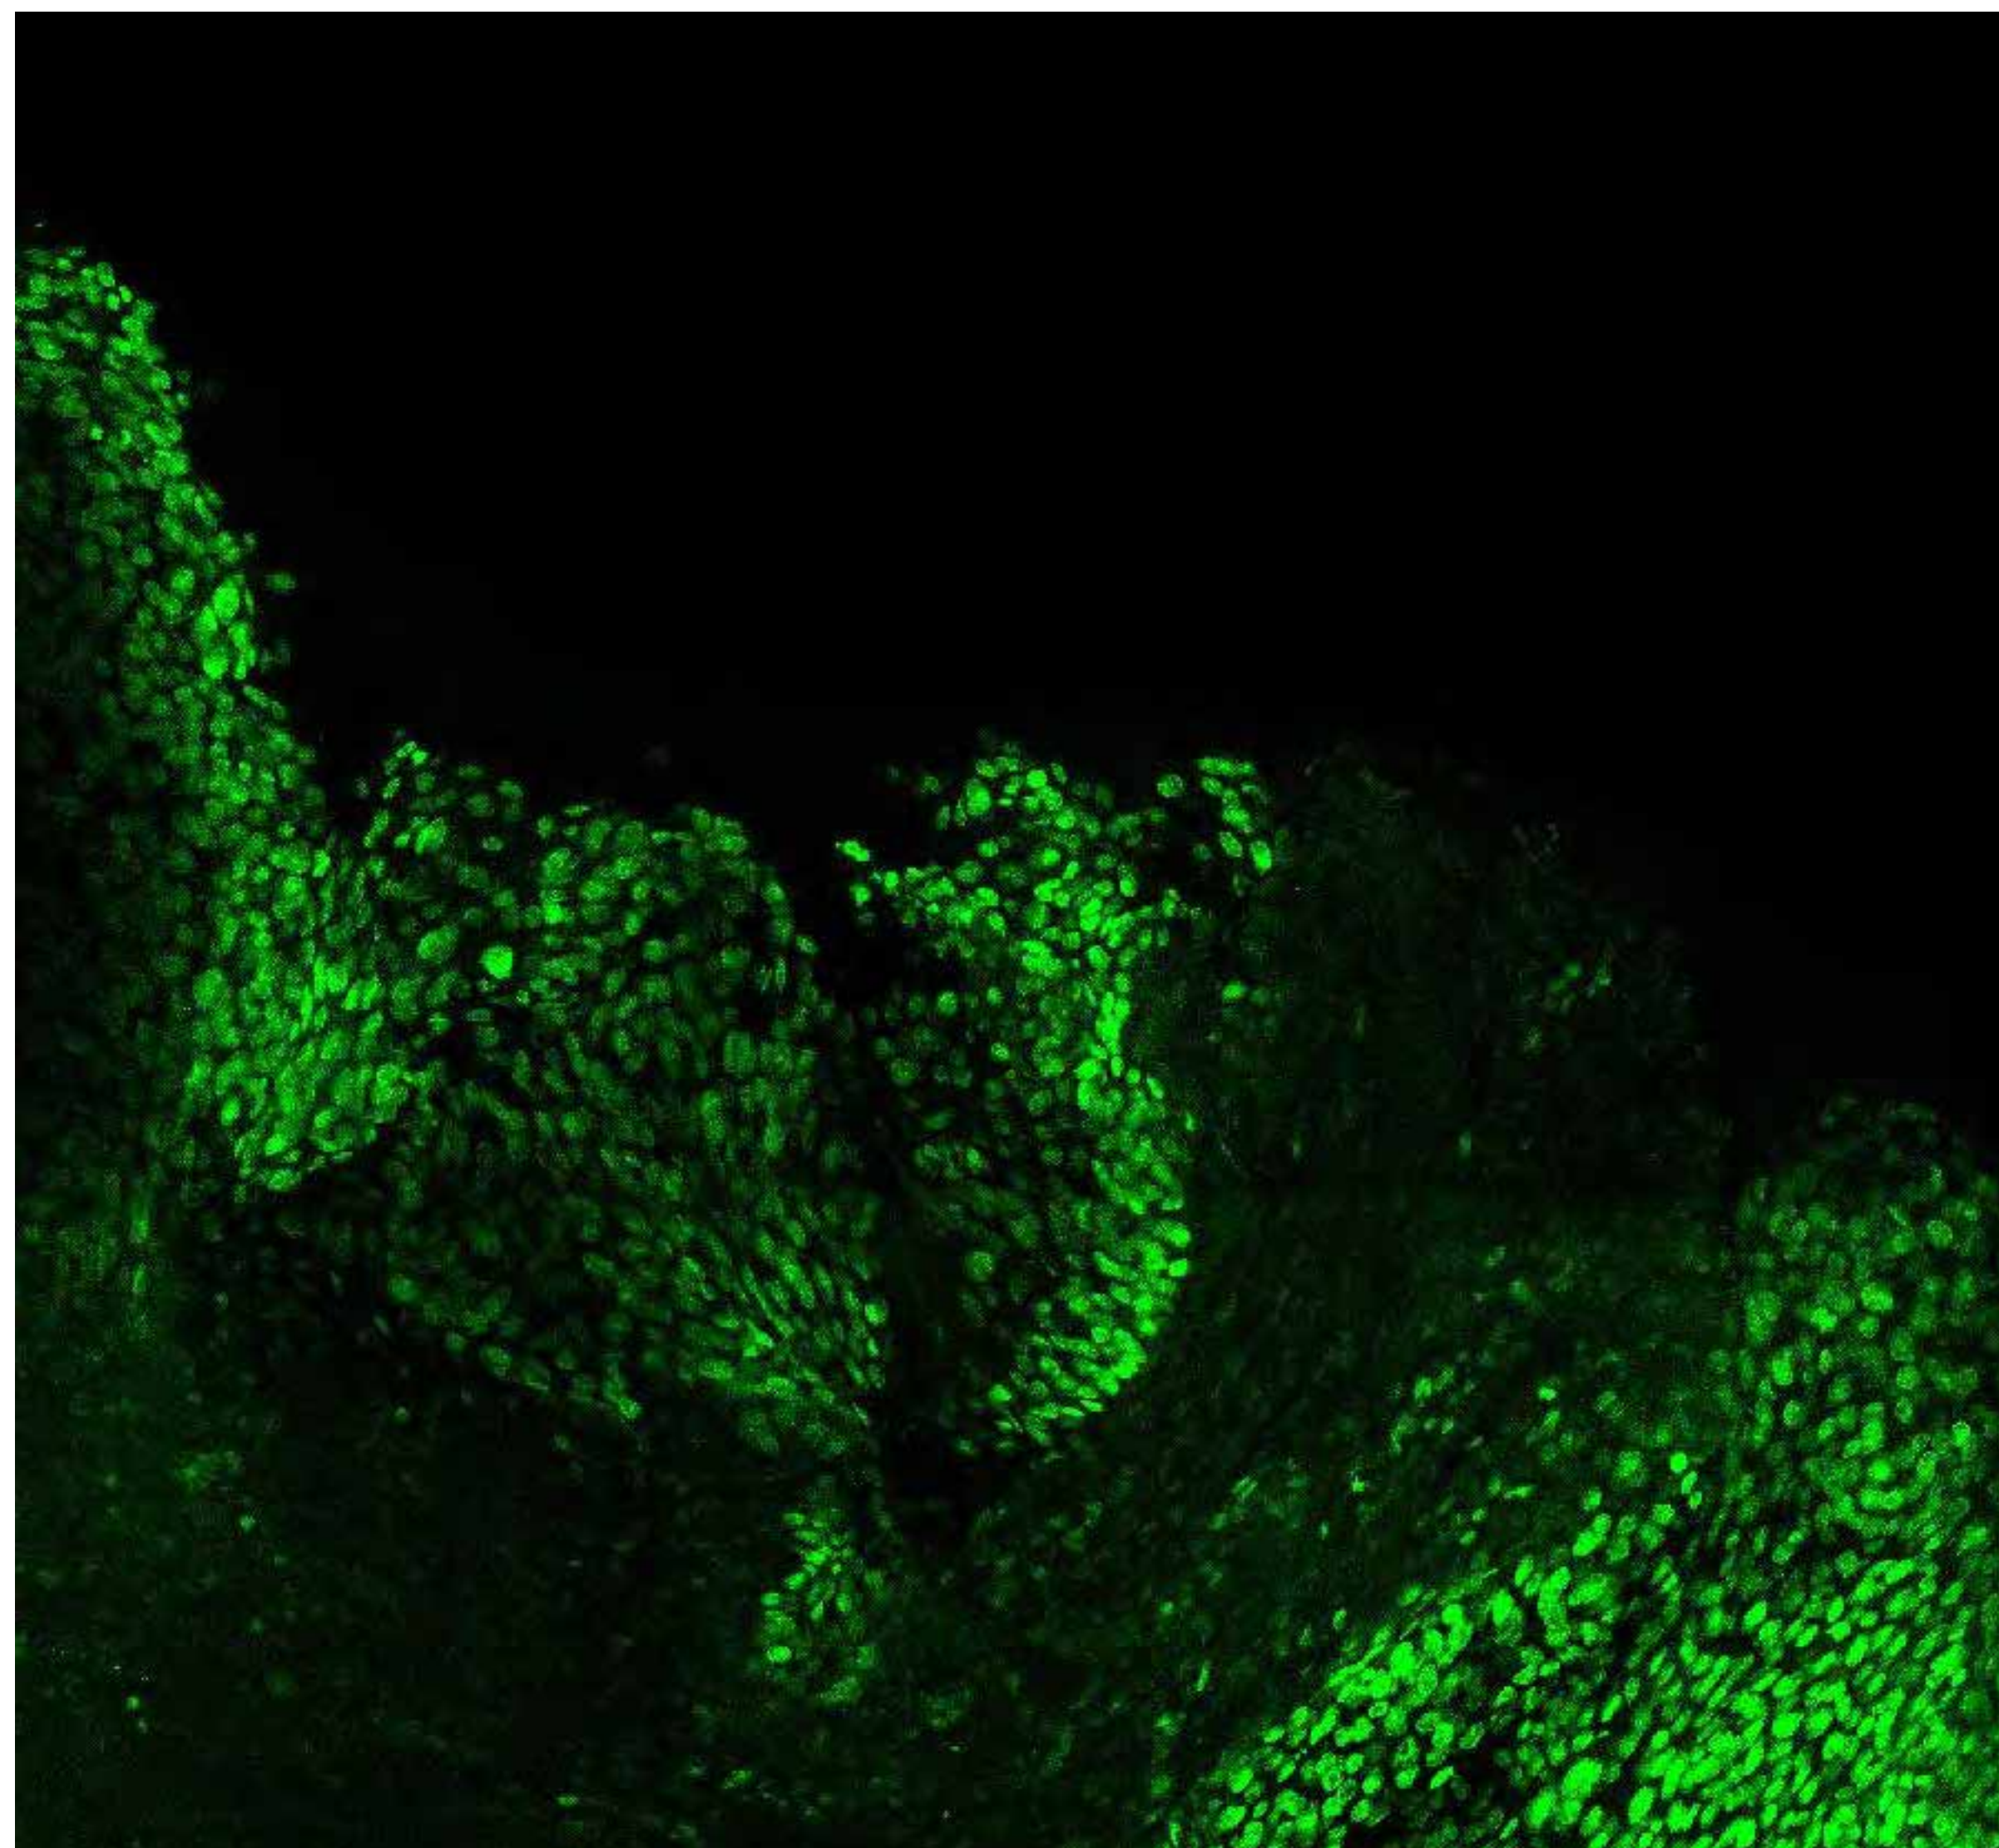

PARPi-FL only (green)

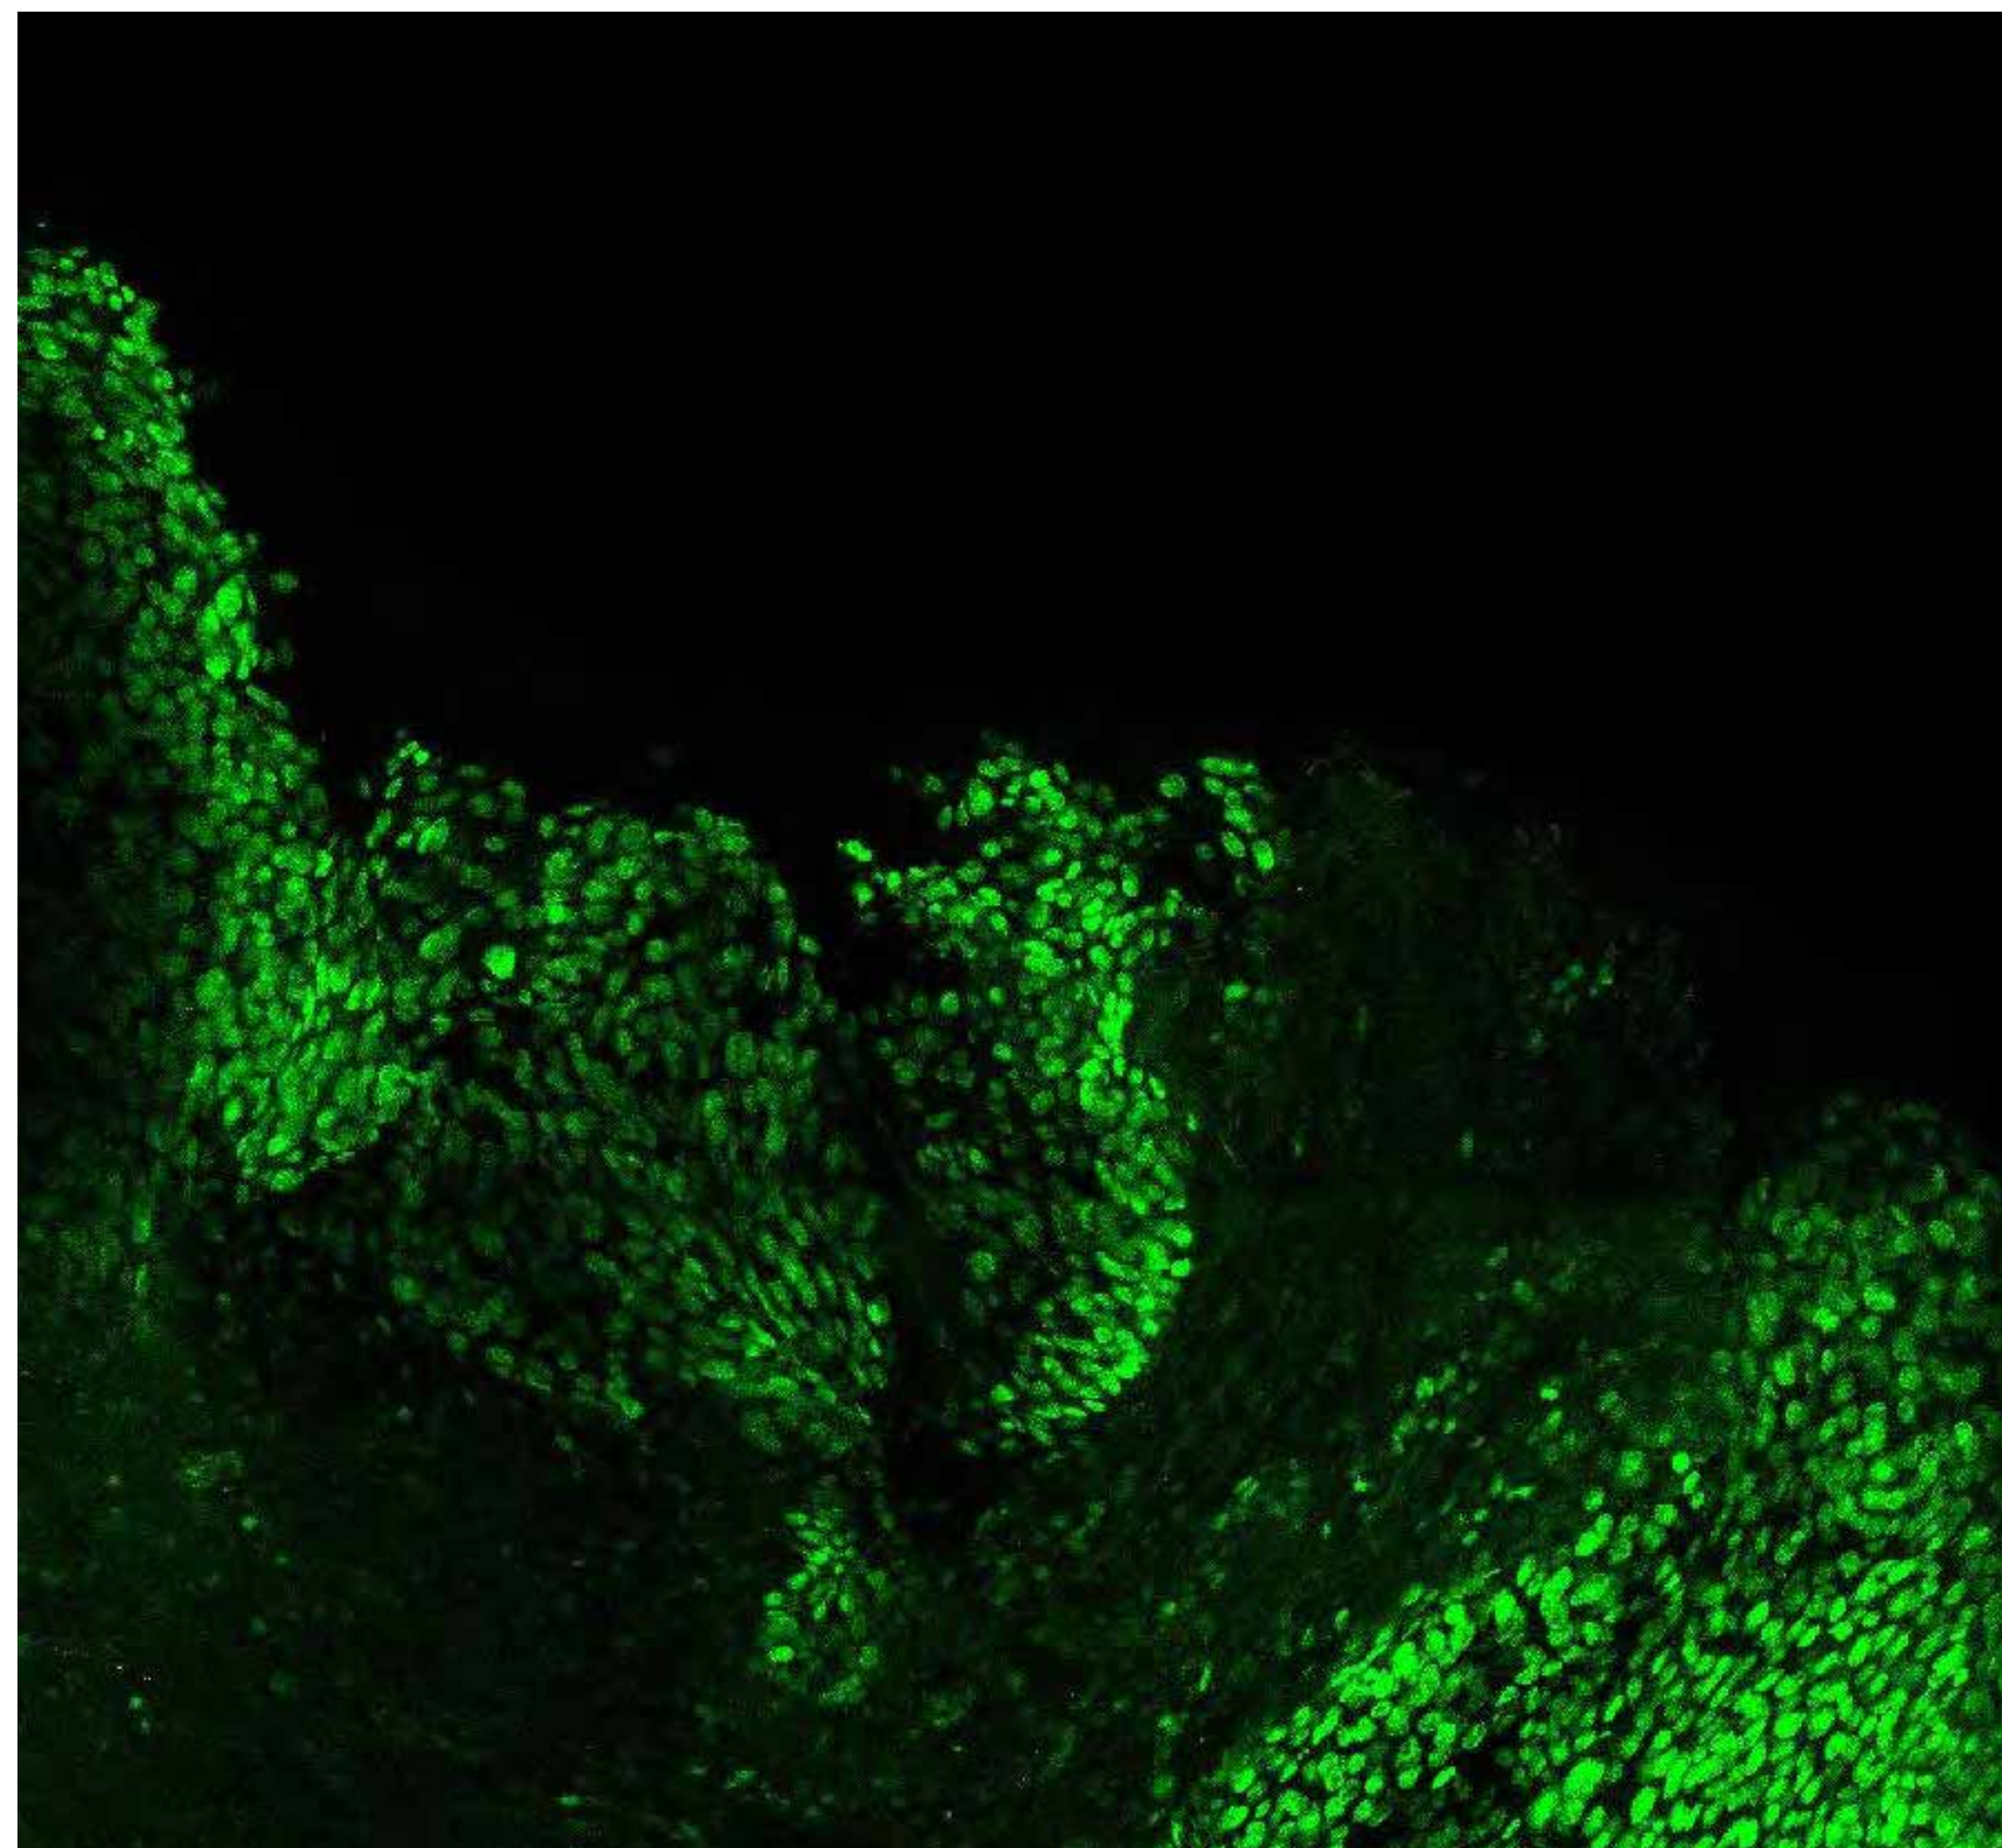

PARPi-FL (green) + Autofluorescence (red/yellow)



9813

Close-up

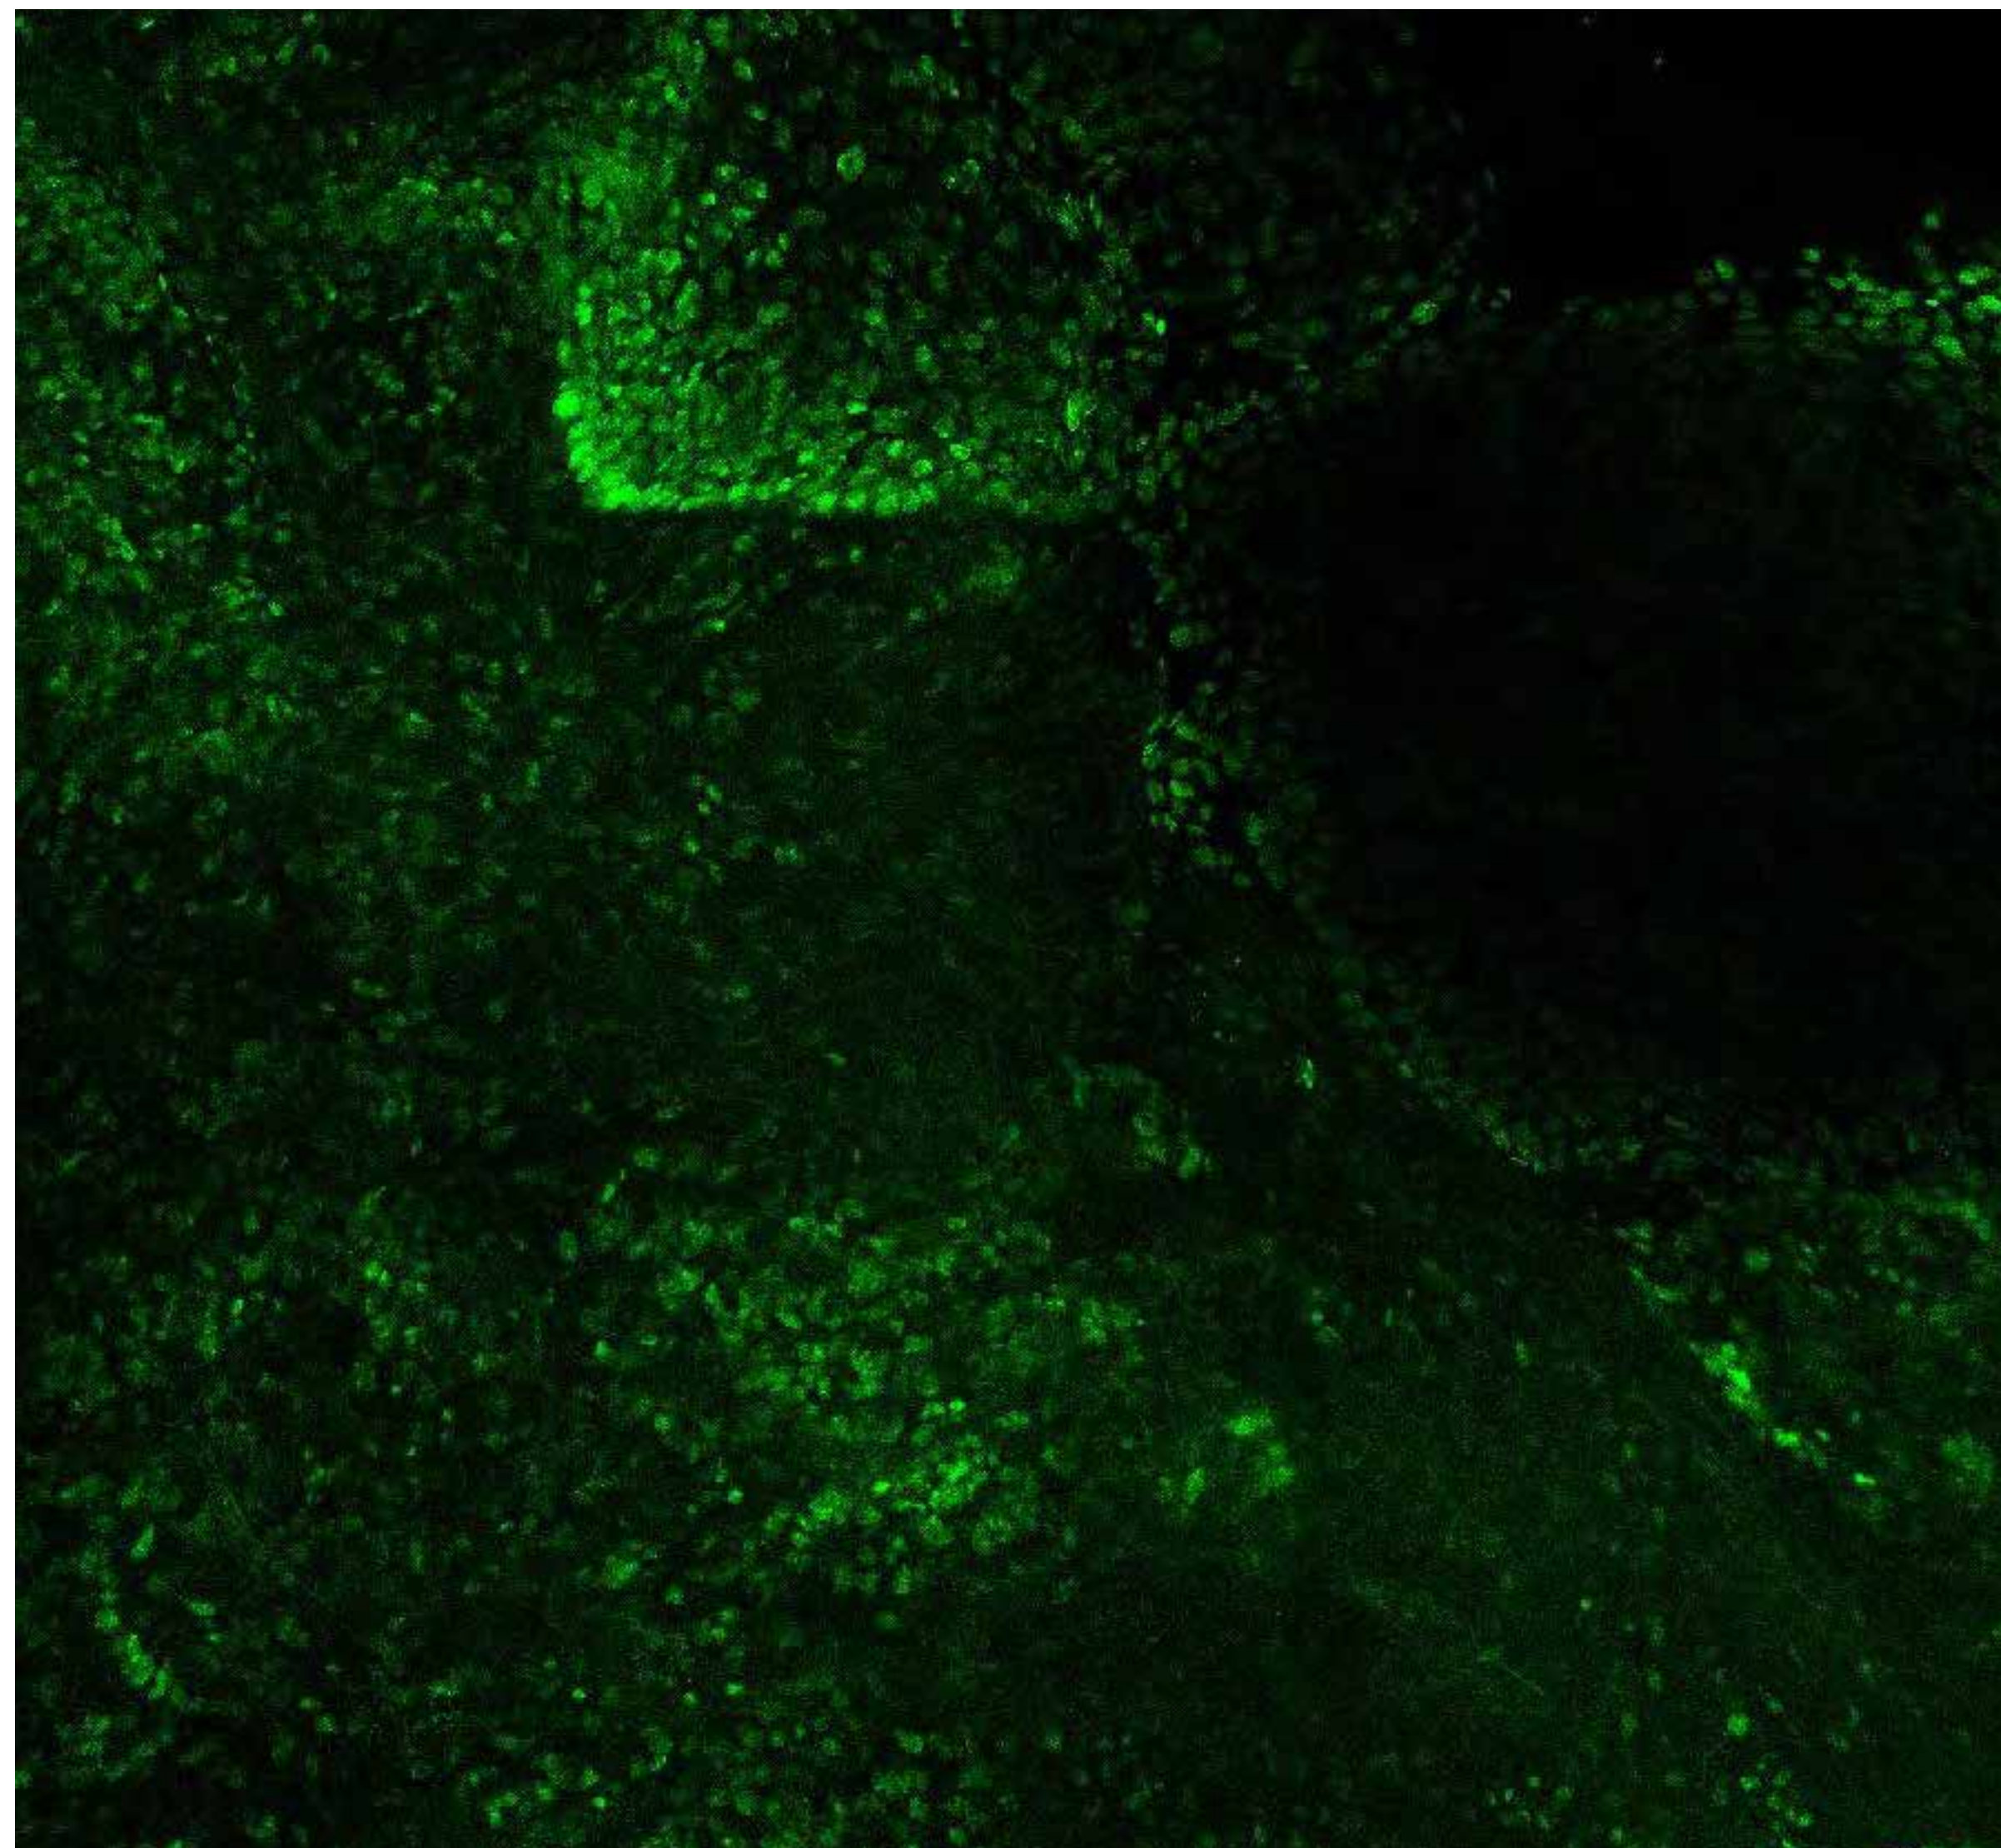

PARPi-FL only (green)

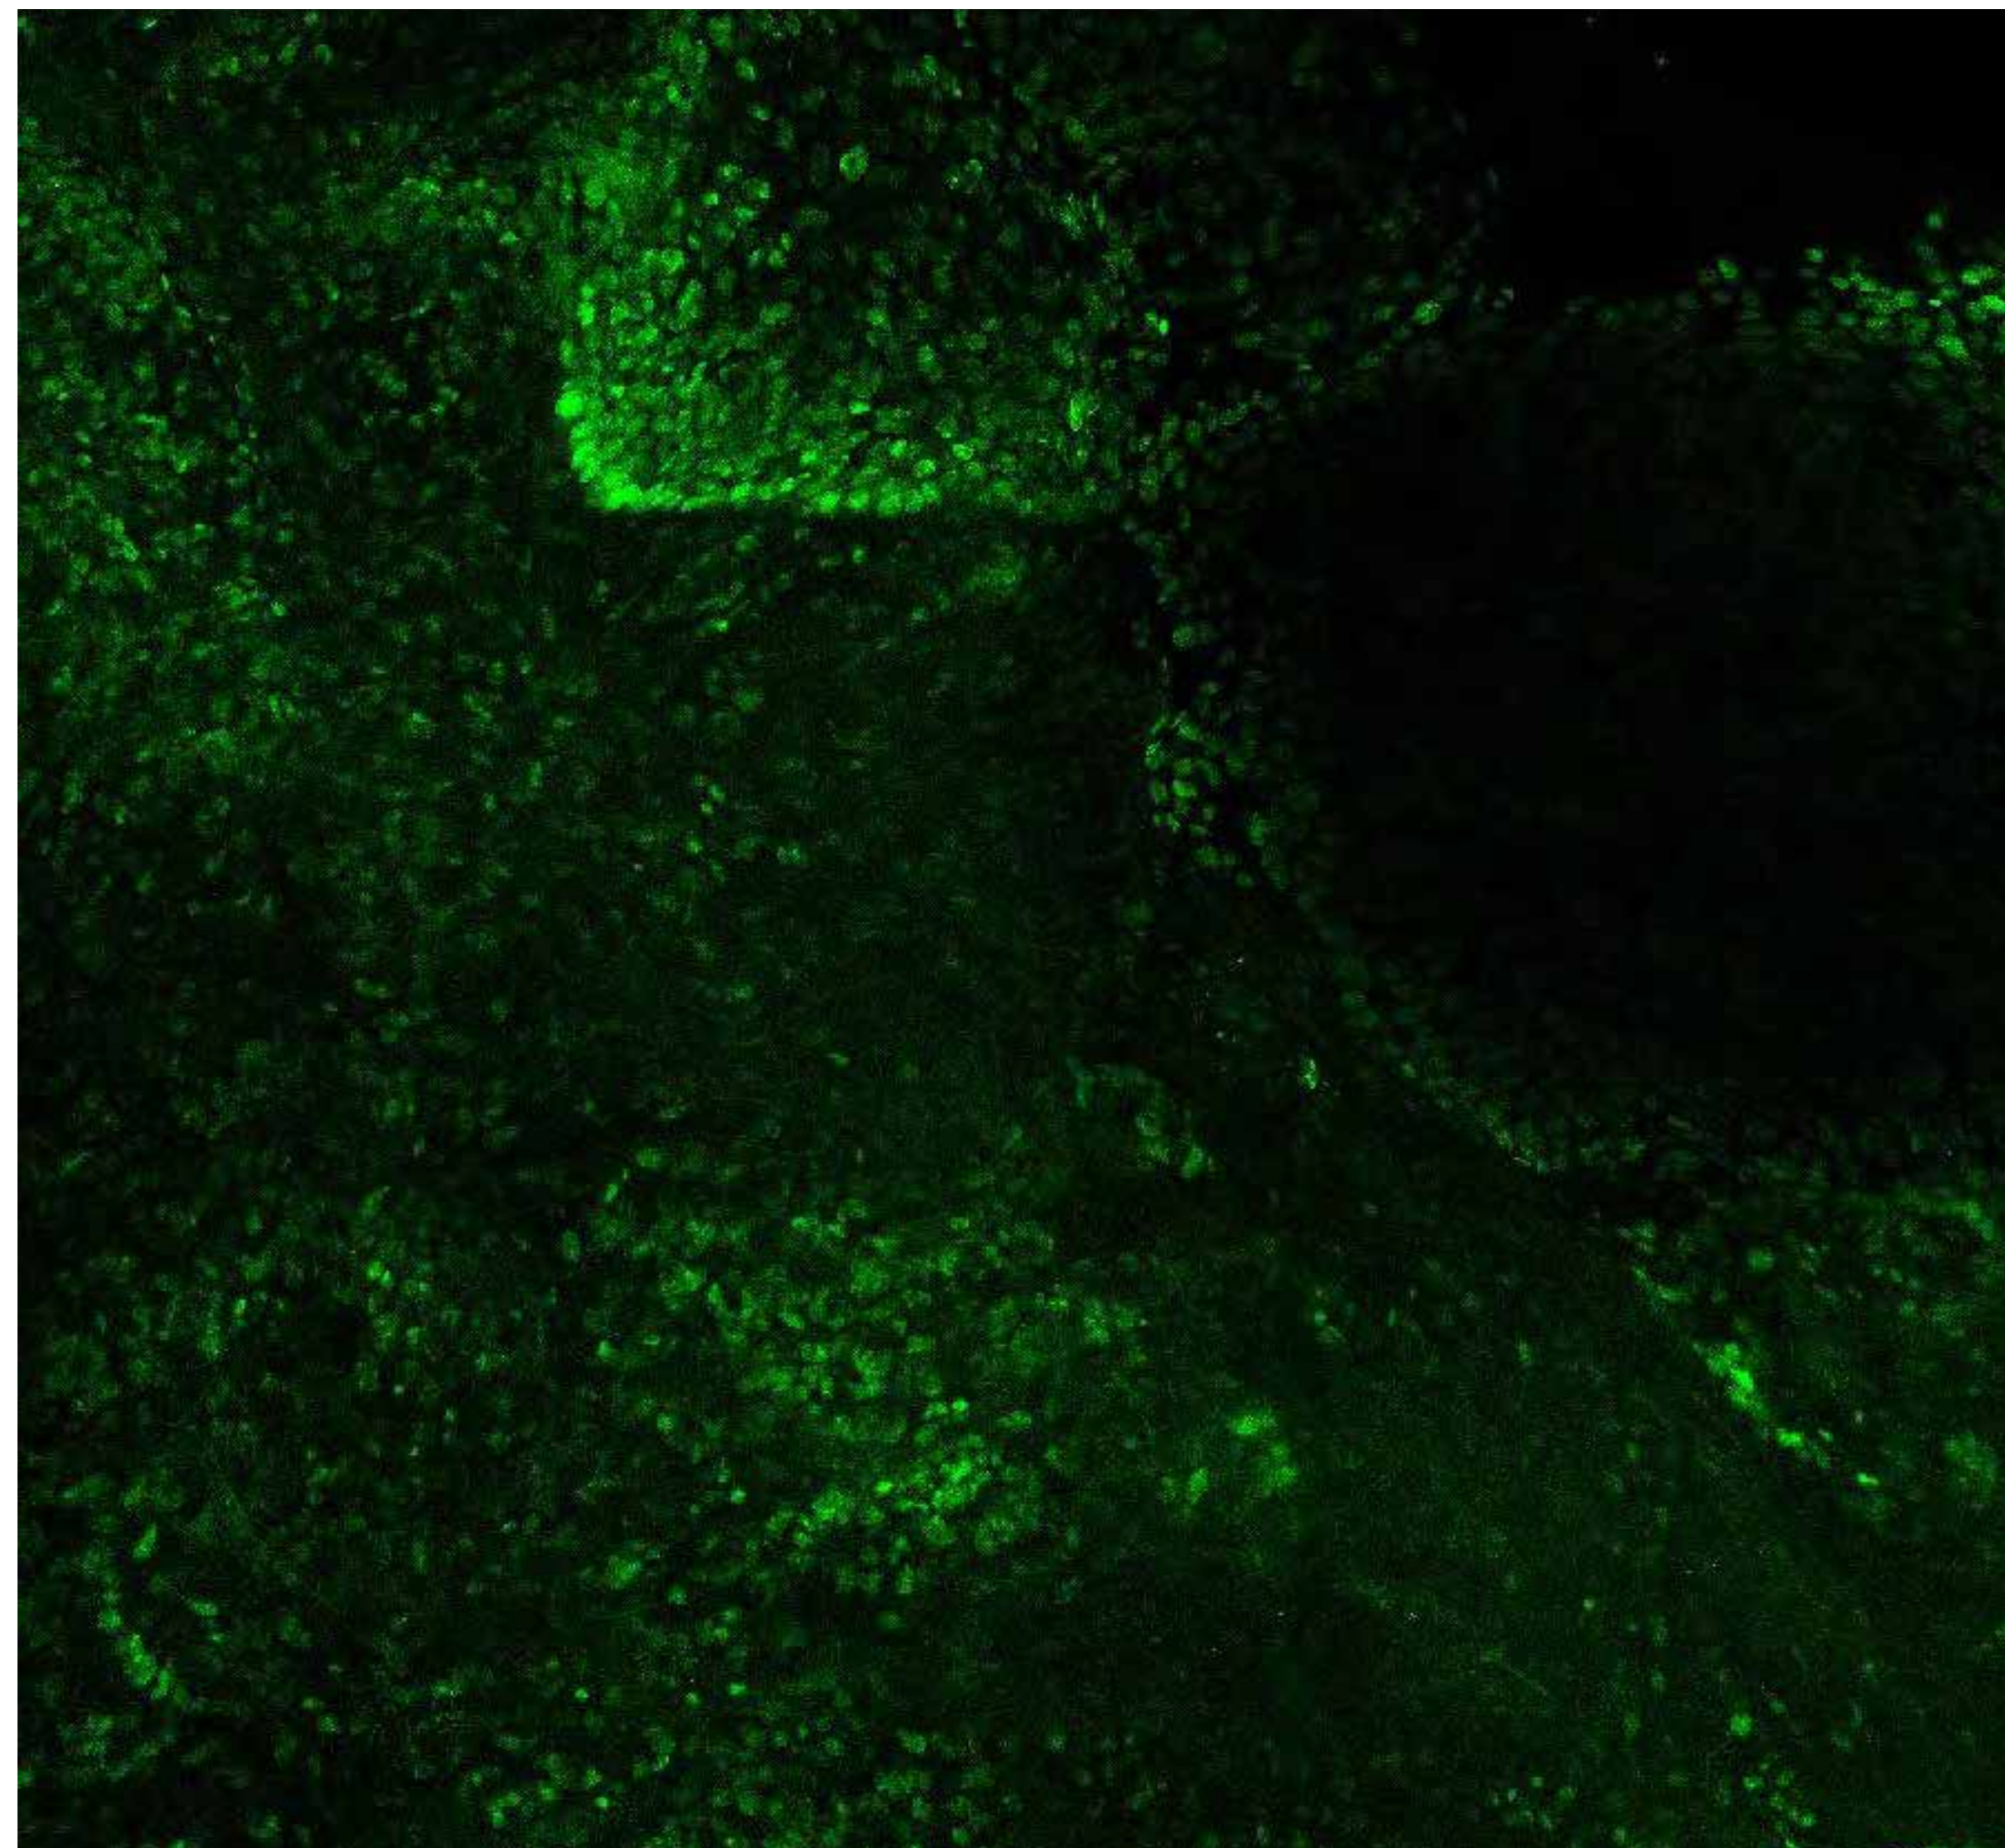

PARPi-FL (green) + Autofluorescence (red/yellow)



9813

10

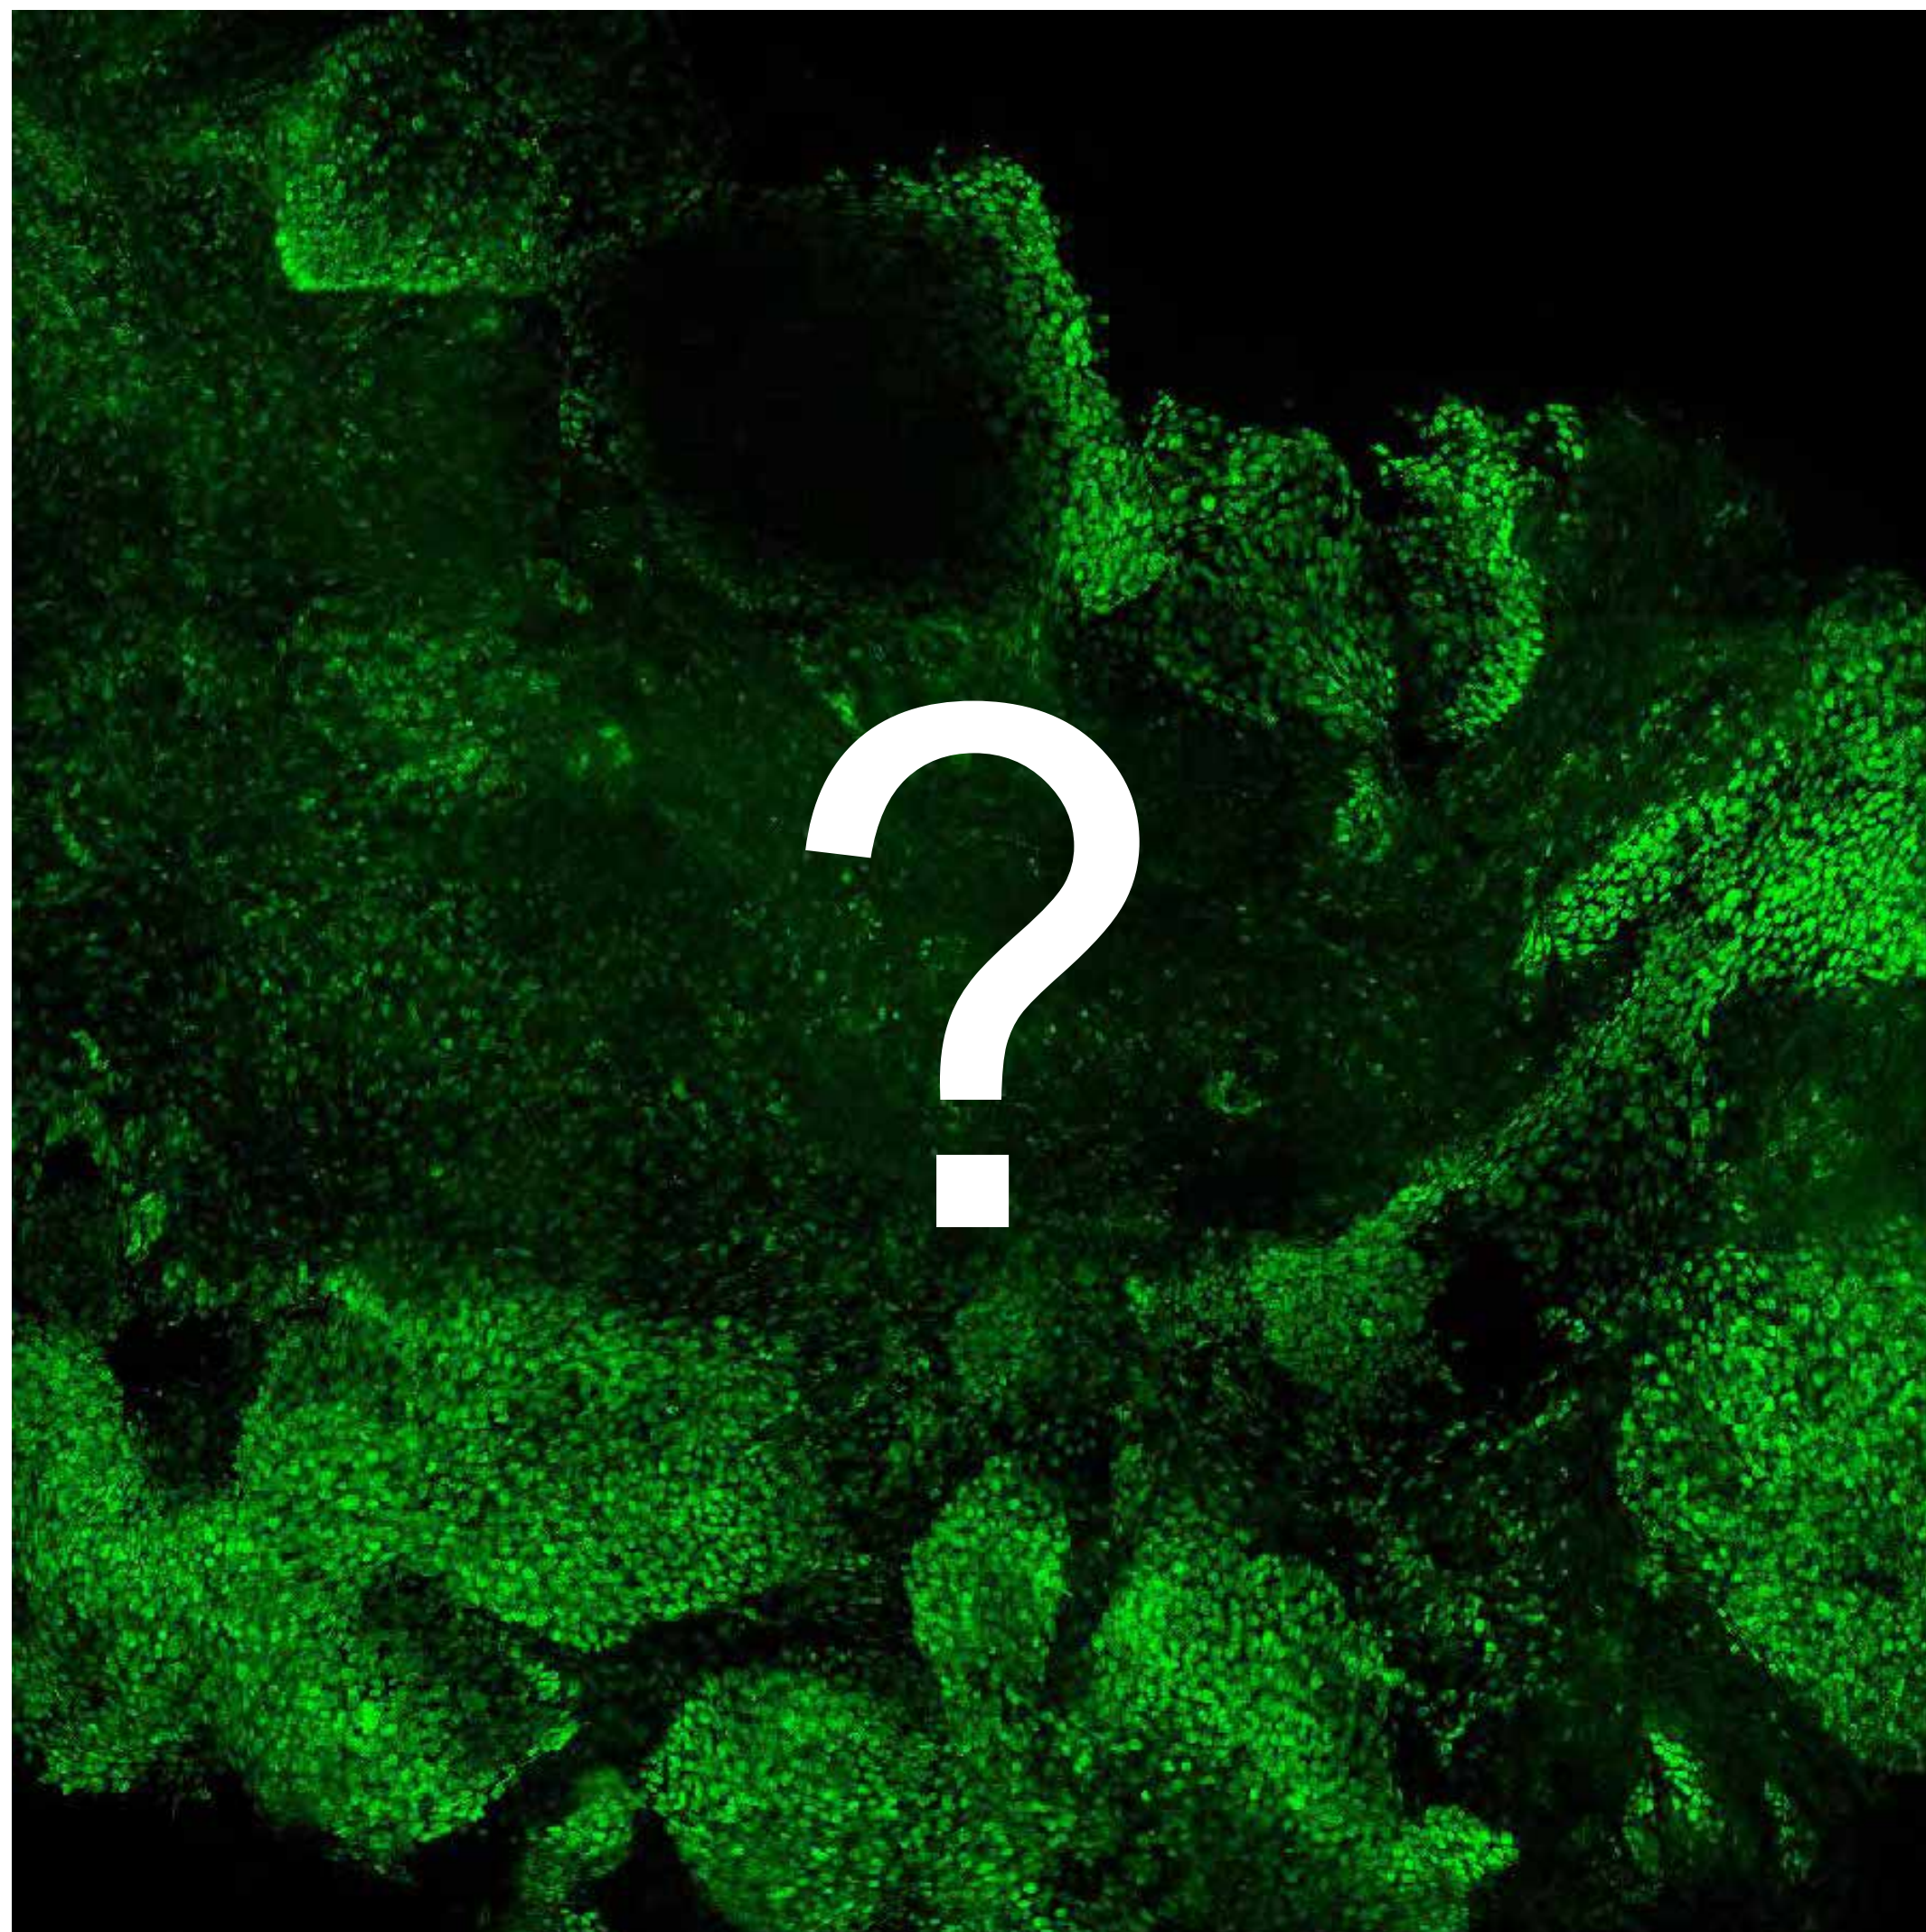

Tumor

Margin



**Congratulations,  
you are done!**

Please hand your scoring sheet to the study supervisor and have a nice day.
